# Supplementary material for: TMEM106B Puncta Is Increased in Multiple Sclerosis Plaques, and Reduced Protein in Mice Results in Delayed Lipid Clearance Following CNS Injury
Source: MDPI journal article supplement (doi:10.3390/cells12131734), 2023-06-27
Supplement: s1 [file s1]

| Accession  | Description                                                       | Gene Symbol | Volcano | RRMS/<br>trl | p-value | Z-score | Control-1 | Control-2 | Control-3 | Control-4 | Control-5 | RRMS-1 | RRMS-2 | RRMS-3 | RRMS-4 | RRMS-5 |
|------------|-------------------------------------------------------------------|-------------|---------|--------------|---------|---------|-----------|-----------|-----------|-----------|-----------|--------|--------|--------|--------|--------|
| P24310     | Cytochrome c oxidase subunit 7A1, mitochondrial                   | COX7A1      |         | 5.25         | 2.39    |         | -0.40     | -0.46     | -0.53     | -0.46     | -0.46     | 1.93   | 1.86   | -0.54  | -0.48  | -0.47  |
| Q9NUM4     | Transmembrane protein 106B                                        | TMEM106B    |         | 3.67         | 6.20    |         | 0.71      | -1.09     | -1.36     | -1.27     | -0.69     | 0.54   | 1.24   | 0.49   | 1.09   | 0.34   |
| P00491     | Purine nucleoside phosphorylase                                   | PNP         |         | 3.42         | 6.30    |         | -0.14     | -0.20     | -1.18     | -0.99     | -1.12     | 0.26   | 1.37   | 1.77   | -0.21  | 0.45   |
| P46926     | Glucosamine-6-phosphate isomerase 1                               | GNPDA1      |         | 3.17         | 4.61    |         | -0.76     | -0.64     | -0.76     | -0.41     | -0.84     | 1.85   | 1.29   | 1.08   | -0.37  | -0.44  |
| P09455     | Retinol-binding protein 1                                         | RBP1        |         | 3.17         | 3.57    |         | 1.05      | -0.74     | -1.59     | -0.62     | -0.83     | 1.12   | 1.23   | 0.06   | -0.52  | 0.84   |
| P42330     | Aldo-keto reductase family 1 member C3                            | AKR1C3      |         | 3.17         | 3.50    |         | -0.91     | -1.01     | -0.77     | 1.00      | -0.99     | 0.93   | -0.99  | 0.51   | 1.10   | 1.12   |
| Q9B540     | Latexin                                                           | LXN         |         | 3.14         | 3.75    |         | -0.96     | -0.11     | -1.77     | 0.05      | 0.00      | -0.48  | 0.47   | 2.05   | 0.28   | 0.47   |
| Q9UL68     | Myelin transcription factor 1-like protein                        | MYT1L       |         | 3.12         | 3.17    |         | 0.57      | -0.78     | -0.86     | -0.78     | -0.75     | 0.32   | 0.43   | 0.30   | -0.74  | 2.29   |
| Q5VW36     | Focadhesin                                                        | FOCAD       |         | 3.11         | 1.98    |         | 0.95      | -0.86     | -0.29     | -0.84     | -0.86     | 0.81   | 2.11   | -0.12  | -0.05  | -0.84  |
| Q16881     | Thioredoxin reductase 1, cytoplasmic                              | TXNRD1      |         | 3.03         | 4.78    |         | -1.60     | -0.12     | -0.06     | 0.30      | -1.92     | 0.97   | 0.91   | 0.38   | 0.39   | 0.74   |
| P15259     | Phosphoglycerate mutase 2                                         | PGAM2       |         | 3.00         | 3.77    |         | -0.83     | -0.91     | 0.10      | -0.38     | -0.92     | 1.21   | -0.84  | 1.70   | -0.30  | 1.17   |
| Q5Y777     | G-protein coupled receptor-associated sorting protein 1           | GRASP1      |         | 2.95         | 2.29    |         | 1.57      | -1.24     | -0.85     | -0.82     | -0.77     | 0.89   | 1.30   | -0.47  | -0.15  | 0.55   |
| Q8NCW5     | NAD(P)H-hydrate epimerase                                         | NAXE        |         | 2.94         | 3.54    |         | 0.55      | -0.97     | -0.24     | -1.07     | -1.00     | 1.30   | 1.08   | 1.39   | -0.82  | -0.23  |
| Q92823     | Neuronal cell adhesion molecule                                   | NRCAM       |         | 2.91         | 3.54    |         | 0.41      | -0.65     | -2.03     | -0.14     | -0.30     | 1.50   | 1.02   | 0.82   | -0.34  | -0.30  |
| AOA0C4DH68 | Immunoglobulin kappa variable 2-24                                | IGKV2-24    |         | 2.91         | 4.17    |         | 0.70      | -0.92     | -1.01     | -0.80     | -0.92     | 0.53   | 1.55   | 1.09   | -0.90  | 0.70   |
| P15153     | Ras-related C3 botulinum toxin substrate 2                        | RAC2        |         | 2.87         | 4.60    |         | -0.60     | -0.61     | -0.87     | -0.67     | -0.68     | 1.60   | 1.35   | -0.92  | 0.24   | 1.15   |
| P14136     | Glial fibrillary acidic protein                                   | GFAP        |         | 2.85         | 4.24    |         | -0.10     | -1.23     | -0.59     | -0.49     | -0.73     | 1.81   | -0.06  | 0.07   | -0.39  | 1.71   |
| O60664     | Perilipin-3                                                       | PLIN3       |         | 2.84         | 1.75    |         | -0.72     | -0.67     | 1.27      | -0.79     | -0.84     | -0.78  | -0.79  | 0.71   | 1.33   | 1.27   |
| Q96AX1     | Vacuolar protein sorting-associated protein 33A                   | VPS33A      |         | 2.84         | 2.27    |         | 0.16      | -0.02     | -1.51     | 0.70      | -1.41     | -0.63  | -0.38  | 1.62   | 0.73   | 0.73   |
| P01019     | Angiotensinogen                                                   | AGT         |         | 2.83         | 3.29    |         | 1.23      | -1.35     | -0.68     | -0.49     | -1.34     | 1.10   | 1.07   | 0.84   | -0.24  | -0.14  |
| P01700     | Immunoglobulin lambda variable 1-47                               | IGLV1-47    |         | 2.76         | 4.08    |         | 0.02      | -0.03     | -1.72     | 0.41      | -1.68     | 0.48   | -0.02  | 1.50   | 0.42   | 0.62   |
| P36959     | GMP reductase 1                                                   | GMFR        |         | 2.74         | 4.81    |         | -1.13     | -1.25     | 1.03      | -0.62     | -1.37     | 1.06   | 0.20   | 0.74   | 0.33   | 1.01   |
| P54803     | Galactocerebrosidase                                              | GALC        |         | 2.73         | 6.91    |         | -0.58     | -1.29     | -1.55     | 0.12      | -0.38     | 1.32   | 1.42   | -0.19  | 0.53   | 0.61   |
| Q9BUT1     | 3-hydroxybutyrate dehydrogenase type 2                            | BDH2        |         | 2.72         | 4.69    |         | -0.54     | -0.87     | 0.27      | 0.09      | -2.17     | 0.62   | 0.42   | 1.50   | 0.09   | 0.60   |
| Q7Z744     | PX domain-containing protein kinase-like protein                  | PKX         |         | 2.72         | 2.23    |         | -0.66     | -2.24     | 0.55      | 0.54      | -0.27     | 0.14   | -0.71  | 0.93   | 0.88   | 0.84   |
| P07741     | Adenine phosphoribosyltransferase                                 | APRT        |         | 2.71         | 3.53    |         | -0.43     | 0.70      | -1.46     | 0.29      | -1.94     | 0.82   | 1.11   | -0.02  | 0.38   | 0.54   |
| P01591     | Immunoglobulin J chain                                            | JCHAIN      |         | 2.70         | 5.30    |         | -0.82     | -1.51     | 0.40      | -0.49     | -0.89     | 0.46   | 0.92   | 1.77   | -0.49  | 0.65   |
| Q63HR2     | Tensin-2                                                          | TNS2        |         | 2.70         | 1.79    |         | 1.45      | -0.76     | -0.84     | -0.79     | -0.83     | 1.50   | 1.25   | -0.48  | -0.52  | 0.02   |
| P11387     | DNA topoisomerase 1                                               | TOP1        |         | 2.68         | 5.15    |         | 0.65      | -1.14     | -0.87     | -0.75     | -1.15     | 1.20   | 0.23   | 1.45   | -0.51  | 0.89   |
| Q13938     | Calcyphosin                                                       | CAPS        |         | 2.68         | 6.30    |         | -0.49     | -1.99     | -0.55     | -0.37     | -0.16     | 1.60   | 0.33   | 0.31   | 0.05   | 1.25   |
| Q95154     | Aflatoxin B1 aldehyde reductase member 3                          | AKR7A3      |         | 2.67         | 10.39   |         | -0.13     | -1.22     | -1.10     | -0.50     | -1.22     | 1.37   | 0.87   | 1.20   | 0.66   | 0.08   |
| P02787     | Serotransferrin                                                   | TF          |         | 2.64         | 2.81    |         | -0.04     | -2.30     | -0.01     | 0.43      | -0.46     | -0.36  | 0.10   | 1.60   | 0.66   | 0.38   |
| O14980     | Exportin-1                                                        | XPO1        |         | 2.62         | 5.77    |         | 0.10      | -0.45     | -1.52     | 0.05      | -1.66     | 0.91   | 1.19   | 1.20   | 0.09   | 0.09   |
| Q9NMV4     | CXXC motif containing zinc binding protein                        | CZIB        |         | 2.61         | 6.52    |         | -1.26     | -1.45     | -0.10     | -1.36     | 0.33      | 1.25   | 0.73   | 0.40   | 0.74   | 0.72   |
| O15067     | Phosphoribosylformylglycinamide synthase                          | PFAS        |         | 2.57         | 2.48    |         | 1.21      | -1.07     | -0.49     | -1.19     | -0.64     | 1.59   | 1.05   | 0.38   | -0.12  | -0.71  |
| Q9Y2W1     | Thyroid hormone receptor-associated protein 3                     | THRAP3      |         | 2.53         | 2.28    |         | 0.20      | -1.82     | -0.82     | -0.10     | 0.46      | 1.98   | 0.77   | -0.07  | -0.14  | -0.47  |
| Q96C23     | Aldose 1-epimerase                                                | GALM        |         | 2.52         | 6.94    |         | -1.07     | -0.30     | -1.32     | 0.12      | -1.12     | 1.72   | -0.01  | 0.74   | 0.14   | 1.10   |
| Q96TA1     | Protein Niban 2                                                   | NIBAN2      |         | 2.45         | 4.65    |         | 0.19      | -1.63     | 0.12      | -0.23     | -1.58     | 1.45   | 0.91   | -0.15  | 0.03   | 0.90   |
| Q92673     | Sortilin-related receptor                                         | SORL1       |         | 2.44         | 5.77    |         | -0.19     | -0.73     | -0.92     | -0.23     | -1.45     | 0.31   | 2.24   | 0.24   | 0.35   | 0.37   |
| P01742     | Immunoglobulin heavy variable 1-69                                | IGHV1-69    |         | 2.42         | 3.50    |         | 0.18      | -0.70     | -0.87     | -0.70     | -0.75     | 1.68   | -0.59  | 1.21   | -0.71  | 1.25   |
| P00739     | Haptoglobin-related protein                                       | HPR         |         | 2.42         | 2.65    |         | 0.34      | 0.58      | -0.38     | -0.66     | -2.19     | -0.17  | 0.66   | 1.31   | -0.40  | 0.91   |
| Q13616     | Cullin-1                                                          | CUL1        |         | 2.40         | 3.89    |         | 0.00      | -0.37     | -2.15     | 0.33      | -0.67     | 0.98   | 1.60   | 0.41   | -0.01  | -0.12  |
| P29375     | Lysine-specific demethylase 5A                                    | KDMA5A      |         | 2.40         | 6.05    |         | -1.04     | -1.24     | -0.07     | -0.70     | -0.58     | 1.16   | 1.84   | 0.86   | 0.02   | -0.26  |
| P50995     | Annexin A11                                                       | ANXA11      |         | 2.39         | 4.01    |         | -0.58     | -1.26     | 0.64      | -0.98     | -0.71     | 1.57   | -0.17  | 0.61   | -0.54  | 1.42   |
| B2RTY4     | Unconventional myosin-IXa                                         | MYO9A       |         | 2.39         | 3.58    |         | 0.62      | -0.56     | -2.34     | -0.32     | -0.21     | 0.89   | 1.00   | 0.71   | -0.32  | 0.54   |
| Q94874     | E3 UFM1-protein ligase 1                                          | UFL1        |         | 2.39         | 4.54    |         | -0.16     | -0.92     | -0.90     | -0.37     | -0.92     | 1.50   | 1.75   | -0.51  | 0.82   | -0.29  |
| Q86VP6     | Cullin-associated NEDD8-dissociated protein 1                     | CAND1       |         | 2.39         | 3.17    |         | 0.60      | -1.23     | -0.80     | -0.71     | -0.43     | 1.54   | 0.02   | 0.02   | -0.72  | 1.70   |
| P10301     | Ras-related protein R-Ras                                         | RRAS        |         | 2.38         | 7.49    |         | -0.74     | -0.71     | -0.74     | -0.24     | -1.47     | 1.54   | 0.67   | 0.39   | -0.19  | 1.48   |
| Q5JVF3     | PCI domain-containing protein 2                                   | PCID2       |         | 2.31         | 3.91    |         | -0.45     | -0.55     | -0.78     | -0.62     | -0.71     | -0.53  | -0.63  | 1.21   | 1.28   | 1.79   |
| Q86TU7     | Actin-histidine N-methyltransferase                               | SETD3       |         | 2.30         | 2.11    |         | -0.14     | 0.02      | -1.07     | 0.06      | -0.91     | 0.33   | 0.25   | 0.00   | -0.97  | 2.43   |
| Q8NH67     | ADP-ribosylation factor GTPase-activating protein 2               | ARFGAP2     |         | 2.29         | 2.86    |         | 1.11      | -0.82     | -1.22     | -0.76     | -0.70     | 0.69   | 0.88   | -1.16  | 1.00   | 0.98   |
| P0CG30     | Glutathione S-transferase theta-2B                                | GSTT2B      |         | 2.28         | 3.12    |         | 0.30      | -1.49     | 0.28      | 0.34      | -2.07     | 0.54   | 0.29   | 1.24   | 0.01   | 0.56   |
| Q9C040     | Tripartite motif-containing protein 2                             | TRIM2       |         | 2.26         | 2.71    |         | -0.51     | -0.90     | -0.03     | -0.39     | -0.62     | 1.88   | 1.71   | -0.91  | -0.30  | 0.09   |
| O75223     | Gamma-glutamylcyclotransferase                                    | GGCT        |         | 2.24         | 2.64    |         | -0.40     | -0.15     | -0.98     | -0.87     | 0.00      | 1.22   | -0.70  | 2.16   | -0.61  | 0.32   |
| O43592     | Exportin-T                                                        | XPO1        |         | 2.24         | 2.67    |         | -0.63     | 0.27      | -1.09     | 1.11      | -2.08     | 0.58   | 0.06   | 0.18   | 1.05   | 0.54   |
| P15531     | Nucleoside diphosphate kinase A                                   | NME1        |         | 2.24         | 3.61    |         | -1.50     | 0.46      | -1.74     | 0.19      | -0.17     | -0.07  | 0.61   | 1.63   | -0.05  | 0.64   |
| Q9Y617     | Phosphoserine aminotransferase                                    | PSAT1       |         | 2.24         | 6.50    |         | -0.34     | -0.95     | -0.51     | 0.06      | -1.88     | 1.46   | -0.18  | 1.15   | 0.50   | 0.68   |
| P08758     | Annexin A5                                                        | ANXA5       |         | 2.23         | 5.32    |         | -1.04     | -0.51     | -0.43     | -0.24     | -1.24     | 1.88   | -0.05  | 0.09   | 0.02   | 1.52   |
| O43665     | Regulator of G-protein signaling 10                               | RGS10       |         | 2.23         | 4.05    |         | 0.41      | -1.29     | -1.67     | 0.65      | -1.16     | 0.28   | 0.11   | 1.00   | 1.07   | 0.60   |
| P48454     | Serine/threonine-protein phosphatase 2B catalytic subunit gamma   | PPP3CC      |         | 2.22         | 2.53    |         | -0.01     | -0.42     | -1.55     | -0.33     | 0.04      | -0.36  | 0.34   | 0.22   | -0.36  | 2.43   |
| P51531     | Probable global transcription activator SNF2L2                    | SMARCA2     |         | 2.22         | 5.82    |         | -0.18     | -1.26     | -0.77     | -0.54     | -0.87     | 1.46   | -0.29  | 0.99   | -0.13  | 1.59   |
| Q9P2P6     | StAR-related lipid transfer protein 9                             | STAR9D      |         | 2.20         | 2.18    |         | 1.05      | -0.86     | -1.04     | -0.90     | -0.26     | 1.52   | 0.96   | 0.94   | -0.95  | -0.45  |
| Q9NQ78     | Kinesin-like protein KIF13B                                       | KIF13B      |         | 2.20         | 3.53    |         | -0.58     | -0.05     | -1.68     | -0.21     | -0.22     | 0.26   | -0.46  | 2.29   | 0.19   | 0.47   |
| O15540     | Fatty acid-binding protein, brain                                 | FABP7       |         | 2.17         | 5.00    |         | -0.57     | -0.36     | -0.57     | 0.37      | -2.17     | 1.37   | -0.14  | 0.86   | 0.48   | 0.72   |
| Q8WX14     | Acyl-coenzyme A thioesterase 11                                   | ACOT11      |         | 2.15         | 2.29    |         | 0.79      | -0.71     | -0.76     | -0.71     | -0.73     | 1.80   | 1.06   | -0.84  | -0.72  | 0.81   |
| Q9Y3D0     | Cytosolic iron-sulfur assembly component 2B                       | CIAO2B      |         | 2.15         | 3.99    |         | -0.82     | -0.99     | -1.02     | 0.85      | -0.90     | -0.89  | 1.36   | 0.46   | 1.02   | 0.93   |
| Q9UNF0     | Protein kinase C and casein kinase substrate in neurons protein 2 | PACSLIN2    |         | 2.14         | 2.39    |         | 1.16      | -1.38     | -0.60     | -1.00     | -0.32     | 1.01   | 1.40   | 0.66   | -0.93  | 0.01   |
| P01834     | Immunoglobulin kappa constant                                     | IGKC        |         | 2.14         | 5.34    |         | -0.07     | -1.90     | -0.17     | -0.59     | -0.59     | 1.39   | -0.10  | 1.40   | -0.22  | 0.85   |
| Q96GR2     | Long-chain-fatty-acid--CoA ligase ACSBG1                          | ACSBG1      |         | 2.13         | 3.59    |         | 0.40      | -1.23     | -1.40     | 0.60      | -1.10     | 1.24   | 1.10   | -0.65  | 0.68   | 0.37   |
| Q96GA7     | Serine dehydratase-like                                           | SDSL        |         | 2.13         | 3.33    |         | 0.84      | -1.37     | -1.12     | 0.31      | -1.30     | 1.62   | 0.14   | -0.24  | 0.40   | 0.72   |
| P28161     | Glutathione S-transferase Mu 2                                    | GSTM2       |         | 2.13         | 6.89    |         | -0.53     | -0.84     | -1.34     | -0.20     | -0.90     | 1.87   | -0.15  | 0.79   | 0.21   | 1.10   |
| Q5VYK3     | Proteasome adapter and scaffold protein ECM29                     | ECPAS       |         | 2.10         | 3.87    |         | 0.58      | 0.10      | -1.66     | -0.39     | -1.49     | 1.38   | 1.00   | 0.68   | -0.37  | 0.17   |
| Q8WTS6     | Histone-lysine N-methyltransferase SETD7                          | SETD7       |         | 2.10         | 5.46    |         | -1.90     | -0.81     | -0.41     | -0.57     | 0.34      | 1.27   | 0.82   | 0.22   | -0.26  | 1.31   |
| O75533     | Splicing factor 3B subunit 1                                      | SF3B1       |         | 2.09         | 3.14    |         | 0.79      | -0.62     | -1.01     | -0.90     | -0.80     | 1.67   | 0.49   | 0.23   | -1.02  | 1.18   |
| Q5EBL8     | PDZ domain-containing protein 11                                  | PDZD11      |         | 2.08         | 2.56    |         | -0.82     | -1.06     | -1.06     | 0.29      | 0.39      | 0.58   | -0.96  | 2.11   | 0.15   | 0.39   |
| P51648     | Aldehyde dehydrogenase family 3 member A2                         | ALDH3A2     |         | 2.06         | 3.43    |         | -0.09     | -0.01     | -0.33     | 0.15      | -2.43     | 1.35   | 0.21   | -0.18  | 0.37   | 0.96   |
| P00390     | Glutathione reductase, mitochondrial                              | GSR         |         | 2.06         | 2.37    |         | -0.46     | -0.86     | -1.04     | -0.36     | 0.54      | 0.43   | -0.90  | 2.24   | -0.27  | 0.67   |
| Q96K76     | Ubiquitin carboxyl-terminal hydrolase 47                          | USP47       |         | 2.06         | 2.27    |         | 0.42      | -0.12     | -2.10     | 0.36      | -0.64     | 1.96   | 0.06   | -0.07  | 0.19   | -0.06  |
| O14939     | Phospholipase D2                                                  | PLD2        |         | 2.06         | 4.57    |         | -1.24     | -1.42     | 0.57      | 0.26      | -1.32     | 1.30   | 1.15   | -0.06  | 0.36   | 0.41   |
| P58107     | Epiplakin                                                         | EPPK1       |         | 2.04         | 2.32    |         | -0.52     | 0.66      | -0.20     | 0.05      | -2.09     | 0.98   | 0.92   | -      |        |        |



|        |                                                                                |           |      |      |       |       |       |       |       |       |       |       |       |       |
|--------|--------------------------------------------------------------------------------|-----------|------|------|-------|-------|-------|-------|-------|-------|-------|-------|-------|-------|
| O00299 | Chloride intracellular channel protein 1                                       | CLIC1     | 1.67 | 4.69 | -0.85 | -0.04 | -0.55 | -0.14 | -1.59 | 1.79  | -0.06 | -0.15 | 0.10  | 1.48  |
| Q8TC07 | TBC1 domain family member 15                                                   | TBC1D15   | 1.67 | 1.19 | -1.03 | 0.62  | -1.54 | 0.35  | 0.29  | 1.16  | 0.64  | -1.61 | 0.51  | 0.62  |
| P35270 | Septaplerin reductase                                                          | SPR       | 1.67 | 2.75 | -0.51 | -0.75 | 0.49  | -0.82 | -0.82 | -0.76 | -0.72 | 1.84  | 1.12  | 0.92  |
| P11172 | Uridine 5'-monophosphate synthase                                              | UMPS      | 1.66 | 1.80 | 0.18  | -0.43 | -0.87 | -0.02 | -0.70 | 0.80  | 2.10  | -1.54 | 0.16  | 0.33  |
| Q14005 | Pro-interleukin-16                                                             | IL16      | 1.65 | 2.73 | -1.53 | 0.39  | -2.10 | 0.57  | 0.21  | 0.23  | 0.19  | 0.36  | 1.02  | 0.66  |
| P80297 | Metallothionein-1X                                                             | MT1X      | 1.65 | 2.00 | 0.24  | 0.39  | -0.06 | -1.18 | -1.30 | 0.76  | 0.19  | 1.78  | -1.30 | 0.49  |
| Q12840 | Kinesin heavy chain isoform 5A                                                 | KIF5A     | 1.65 | 3.98 | -0.77 | -0.13 | -0.94 | -0.47 | -0.77 | 0.38  | 2.23  | 1.13  | -0.52 | -0.14 |
| B9A064 | Immunoglobulin lambda-like polypeptide 5                                       | IGLL5     | 1.64 | 4.05 | -0.38 | -1.34 | 0.32  | -0.68 | -0.87 | 1.59  | -0.42 | 1.20  | -0.55 | 1.14  |
| Q8WVM7 | Cohesin subunit SA-1                                                           | STAG1     | 1.64 | 0.97 | 1.63  | -0.69 | -0.79 | -0.53 | -0.75 | 2.02  | -0.11 | -0.24 | -0.49 | -0.06 |
| Q04760 | Lactoylglutathione lyase                                                       | GLO1      | 1.64 | 4.32 | 0.18  | -1.15 | -0.52 | -0.84 | -0.78 | 0.85  | 0.61  | 2.12  | -0.65 | 0.18  |
| Q14118 | Dystroglycan                                                                   | DAG1      | 1.64 | 2.54 | -0.94 | 0.40  | 0.55  | -1.10 | -1.14 | 1.60  | -1.15 | 0.59  | 0.26  | 0.91  |
| Q5VW32 | BRO1 domain-containing protein BROX                                            | BROX      | 1.63 | 5.01 | -0.44 | -2.05 | -0.64 | 0.56  | -0.75 | 1.39  | 0.20  | 0.21  | 1.02  | 0.49  |
| P51178 | 1-phosphatidylinositol 4,5-bisphosphate phosphodiesterase delta-1              | PLCD1     | 1.63 | 3.91 | -0.03 | -1.27 | -1.08 | 0.45  | -0.94 | 1.39  | -0.87 | 0.17  | 1.28  | 0.90  |
| Q61C98 | GRAM domain-containing protein 4                                               | GRAMD4    | 1.62 | 2.24 | -0.40 | -0.40 | -0.61 | -0.36 | -0.42 | -0.40 | -0.40 | -0.75 | 2.07  | 1.68  |
| O94913 | Pre-mRNA cleavage complex 2 protein Pcf11                                      | PCF11     | 1.61 | 3.95 | 0.60  | -1.66 | -1.79 | 0.30  | -0.50 | 0.57  | 0.45  | 0.16  | 0.79  | 1.09  |
| P37802 | Transgelin-2                                                                   | TAGLN2    | 1.60 | 4.27 | -0.74 | -0.32 | -1.47 | -0.96 | 0.50  | 0.34  | -0.42 | 1.29  | 0.04  | 1.75  |
| Q96B70 | Leukocyte receptor cluster member 9                                            | LENG9     | 1.60 | 2.09 | -0.32 | -0.37 | -0.57 | -0.37 | -0.48 | 2.25  | 1.46  | -0.72 | -0.46 | -0.42 |
| P04003 | C4b-binding protein alpha chain                                                | C4BPA     | 1.59 | 4.47 | -0.70 | -1.23 | 0.84  | -0.32 | -1.72 | 0.93  | 0.19  | 0.48  | 0.09  | 1.44  |
| P00915 | Carbonic anhydrase 1                                                           | CA1       | 1.59 | 2.92 | -0.86 | -0.85 | 0.51  | -0.05 | -1.20 | -0.71 | 0.88  | 2.11  | 0.26  | -0.09 |
| O95837 | Guanine nucleotide-binding protein subunit alpha-14                            | GNA14     | 1.59 | 2.71 | 0.54  | -0.10 | -1.77 | 0.60  | -1.67 | 1.21  | 0.87  | -0.21 | 0.12  | 0.40  |
| Q9NUQ2 | 1-acyl-sn-glycerol-3-phosphate acyltransferase epsilon                         | AGPAT5    | 1.58 | 1.35 | 1.25  | -0.94 | -1.05 | 0.33  | -1.04 | 1.22  | 1.04  | -1.22 | 0.45  | -0.03 |
| Q9ULL5 | Proline-rich protein 12                                                        | PRR12     | 1.58 | 2.04 | 1.08  | -0.16 | -0.90 | 0.01  | -1.97 | 1.16  | 1.29  | -0.23 | -0.10 | -0.18 |
| Q16222 | UDP-N-acetylhexosamine pyrophosphorylase                                       | UAP1      | 1.58 | 3.14 | -0.78 | -0.83 | -1.02 | 1.09  | -0.99 | -0.86 | 0.27  | 1.59  | 0.71  | 0.81  |
| Q9NQZ5 | StAR-related lipid transfer protein 7, mitochondrial                           | STAR7     | 1.57 | 2.30 | -0.52 | 0.23  | 0.01  | 0.49  | -2.32 | 0.59  | 0.48  | -0.80 | 1.18  | 0.67  |
| Q6PD62 | RNA polymerase-associated protein CTR9 homolog                                 | CTR9      | 1.57 | 1.89 | 1.12  | -0.96 | -1.11 | -0.55 | -0.33 | 1.46  | 1.55  | -0.04 | -0.49 | -0.65 |
| Q8N4T8 | Carbonyl reductase family member 4                                             | CBR4      | 1.56 | 2.24 | -1.64 | 0.82  | 0.37  | 0.24  | -1.93 | 0.05  | 0.38  | 1.13  | 0.03  | 0.54  |
| Q96KN2 | Beta-Ala-His dipeptidase                                                       | CNDP1     | 1.56 | 2.22 | 0.42  | -1.39 | -1.60 | 0.15  | 0.38  | -0.17 | -0.57 | 1.53  | 1.20  | 0.05  |
| Q9H977 | WD repeat-containing protein 54                                                | WDR54     | 1.55 | 2.81 | -0.37 | 0.40  | -1.10 | 0.74  | -2.09 | 0.99  | -0.44 | 0.45  | 0.43  | 1.00  |
| Q15323 | Keratin, type 1 cuticular Ha1                                                  | KRT31     | 1.55 | 1.35 | 1.13  | 0.54  | -0.89 | -1.06 | -1.17 | 0.81  | 1.35  | 0.75  | -0.61 | -0.86 |
| Q9UKV8 | Protein argonaute-2                                                            | AGO2      | 1.55 | 2.04 | -0.76 | 0.73  | -0.96 | -0.08 | -0.89 | 1.66  | 0.70  | 1.25  | -0.85 | -0.80 |
| Q04721 | Neurogenic locus notch homolog protein 2                                       | NOTCH2    | 1.55 | 1.26 | -1.24 | -0.33 | -1.41 | 0.61  | 1.00  | -1.36 | 0.24  | 0.72  | 0.88  | 0.88  |
| Q9NZL3 | Zinc finger protein 224                                                        | ZNF224    | 1.55 | 2.91 | 0.93  | -1.09 | -1.28 | -0.96 | 0.00  | -0.95 | 0.21  | 1.09  | 0.78  | 1.28  |
| P60174 | Triosephosphate isomerase                                                      | TP1       | 1.55 | 3.34 | -0.68 | 0.02  | -1.17 | -0.43 | -1.43 | 0.07  | -0.08 | 2.48  | -0.07 | 0.29  |
| Q86XZ4 | Spermatogenesis-associated serine-rich protein 2                               | SPATS2    | 1.55 | 1.71 | 0.81  | 0.85  | -1.23 | -1.06 | -1.08 | 0.97  | 0.90  | 0.84  | -1.15 | 0.15  |
| Q9Y4E8 | Ubiquitin carboxyl-terminal hydrolase 15                                       | USP15     | 1.55 | 1.57 | -0.92 | -0.33 | 1.24  | -0.43 | -1.17 | -1.09 | 0.07  | 1.51  | 1.22  | -0.09 |
| Q8IWJ2 | GRIP and coiled-coil domain-containing protein 2                               | GCC2      | 1.55 | 1.76 | 0.92  | -0.68 | -0.83 | -0.52 | -0.66 | 0.77  | 1.87  | -0.99 | -0.72 | 0.84  |
| Q16637 | Survival motor neuron protein                                                  | SMN1      | 1.54 | 3.44 | 0.24  | -0.55 | -1.70 | 0.78  | -1.48 | 0.00  | 0.55  | 0.21  | 0.41  | 1.56  |
| Q9BWW4 | Single-stranded DNA-binding protein 3                                          | SSBP3     | 1.54 | 2.43 | -0.68 | -0.73 | -0.87 | 0.89  | -0.79 | -0.68 | -0.71 | 0.95  | 0.83  | 1.81  |
| P29376 | Leukocyte tyrosine kinase receptor                                             | LTK       | 1.54 | 1.72 | 1.73  | -0.87 | -0.99 | -0.78 | -0.82 | 0.80  | 1.20  | 0.40  | 0.18  | -0.85 |
| P68036 | Ubiquitin-conjugating enzyme E2 L3                                             | UBE2L3    | 1.54 | 6.49 | -0.01 | -1.18 | -1.60 | -0.09 | -0.70 | 0.08  | 1.59  | 1.35  | 0.21  | 0.38  |
| O15488 | Glycogenin-2                                                                   | GYG2      | 1.54 | 2.00 | -0.13 | -1.65 | -1.14 | 0.66  | 0.36  | 0.93  | -1.33 | 0.76  | 0.85  | 0.69  |
| Q72636 | FERM domain-containing protein 5                                               | FRMD5     | 1.53 | 2.42 | 0.67  | -0.22 | -2.13 | 0.21  | -0.70 | 1.40  | 0.94  | -0.69 | 0.32  | 0.19  |
| Q16527 | Cysteine and glycine-rich protein 2                                            | CSR2      | 1.53 | 1.68 | 0.30  | 0.40  | -2.41 | 0.42  | -0.43 | 0.82  | 0.11  | -0.72 | 0.38  | 1.13  |
| Q9NUJ3 | T-complex protein 11-like protein 1                                            | TC11L1    | 1.52 | 2.98 | -0.53 | 0.16  | -0.80 | -0.65 | -0.76 | 1.21  | 1.60  | -0.96 | -0.59 | 1.33  |
| P43897 | Blongation factor Ts, mitochondrial                                            | TSPM      | 1.52 | 2.02 | -0.34 | -0.73 | 1.26  | -1.00 | -1.11 | 1.13  | 1.64  | -0.75 | -0.07 | -0.03 |
| Q8IWA5 | Choline transporter-like protein 2                                             | SLC44A2   | 1.52 | 2.01 | -1.26 | -1.35 | 0.58  | 0.53  | -0.42 | 1.17  | -1.31 | 0.99  | 0.82  | 0.25  |
| Q14139 | Ubiquitin conjugation factor E4 A                                              | UBE4A     | 1.51 | 3.30 | -0.54 | 0.39  | -0.61 | 0.27  | -2.13 | 1.48  | -0.20 | -0.19 | 0.50  | 1.04  |
| Q6EEV6 | Small ubiquitin-related modifier 4                                             | SUMO4     | 1.51 | 1.36 | -0.85 | -0.95 | -1.07 | -0.77 | 0.65  | -0.89 | -0.87 | 1.46  | 0.83  | 0.91  |
| Q96EK7 | Constitutive coactivator of peroxisome proliferator-activated receptor FAM120B | FAM120B   | 1.51 | 3.62 | 0.93  | -0.52 | -0.17 | -1.48 | -1.53 | 1.12  | -0.12 | 0.16  | 1.40  | 0.22  |
| Q99747 | Gamma-soluble NSF attachment protein                                           | NAPG      | 1.50 | 7.12 | -1.41 | -0.86 | -1.26 | -0.47 | 0.28  | 1.05  | 0.90  | 1.27  | -0.35 | 0.85  |
| P43405 | Tyrosine-protein kinase SYK                                                    | SYK       | 1.50 | 1.17 | 1.08  | -0.39 | -2.01 | -0.11 | 0.14  | 1.21  | 1.20  | -0.79 | -0.04 | -0.27 |
| O15484 | Calpain-5                                                                      | CAPN5     | 1.50 | 1.23 | 1.61  | -0.66 | -0.73 | -0.76 | -0.81 | 1.32  | 1.33  | -0.62 | -0.49 | -0.19 |
| Q723K3 | Pogo transposable element with ZNF domain                                      | POGZ      | 1.50 | 1.96 | 1.13  | -1.60 | -1.78 | -0.17 | 0.47  | 0.93  | 0.85  | -0.03 | -0.16 | 0.36  |
| Q9NRF8 | CTP synthase 2                                                                 | CTPS2     | 1.50 | 4.52 | 0.10  | -0.64 | 0.09  | -0.56 | -2.07 | 0.47  | 1.23  | 1.24  | -0.53 | 0.66  |
| P11171 | Protein 4.1                                                                    | EPB41     | 1.49 | 3.06 | 1.25  | -1.23 | -0.72 | -0.74 | -1.06 | 0.85  | 0.35  | 0.56  | -0.71 | 1.44  |
| Q8N126 | Cell adhesion molecule 3                                                       | CADM3     | 1.49 | 2.53 | -0.17 | 0.94  | -2.37 | -0.15 | -0.55 | 0.27  | 1.39  | 0.35  | 0.11  | 0.17  |
| Q96FS4 | Signal-induced proliferation-associated protein 1                              | SIPA1     | 1.49 | 2.11 | -0.67 | 0.75  | -0.94 | -0.21 | -0.93 | 1.00  | 1.94  | -1.19 | 0.15  | 0.11  |
| Q9H9B4 | Sideroflexin-1                                                                 | SFXN1     | 1.49 | 2.09 | -0.61 | 0.42  | -0.48 | -0.56 | -0.80 | -0.64 | 1.41  | 2.11  | -0.20 | -0.63 |
| Q32P44 | Echinoderm microtubule-associated protein-like 3                               | EML3      | 1.49 | 1.91 | -0.39 | 0.60  | -0.14 | 0.42  | -2.37 | 0.76  | -0.84 | 0.79  | 0.33  | 0.83  |
| Q93069 | Apical junction component 1 homolog                                            | AJM1      | 1.48 | 1.64 | 0.40  | -0.04 | 0.46  | -1.01 | -1.49 | 1.38  | 1.21  | -0.10 | 0.50  | -1.33 |
| Q9GZT4 | Serine racemase                                                                | SRR       | 1.48 | 1.42 | 0.93  | -0.38 | -2.20 | 0.30  | -0.15 | 1.25  | 0.72  | -0.91 | 0.16  | 0.29  |
| Q9Y2D4 | Exocyst complex component 6B                                                   | EXOC6B    | 1.48 | 0.77 | 1.06  | 0.10  | -0.73 | -0.69 | -0.68 | 1.23  | 1.83  | -0.84 | -0.66 | -0.62 |
| Q15274 | Nicotinate-nucleotide pyrophosphorylase [carboxylating]                        | QPRT      | 1.48 | 1.50 | -0.24 | -0.75 | -0.10 | 0.84  | -1.33 | 0.81  | -1.28 | 1.75  | 0.65  | -0.36 |
| P21817 | Ryanodine receptor 1                                                           | RYR1      | 1.48 | 2.47 | -0.38 | -0.44 | -0.68 | -0.44 | -0.41 | -0.51 | -0.45 | 2.25  | 1.47  | -0.41 |
| P06703 | Protein S100-A6                                                                | S100A6    | 1.47 | 1.90 | 0.05  | 0.05  | 0.65  | -0.08 | -2.57 | 1.13  | -0.15 | 0.04  | 0.04  | 0.83  |
| A2RTX5 | Threonine--tRNA ligase 2, cytoplasmic                                          | TARS2     | 1.47 | 2.65 | 0.89  | -0.97 | -0.14 | 0.17  | -2.37 | 0.45  | 0.78  | 0.85  | 0.09  | 0.25  |
| Q15057 | Arf-GAP with coiled-coil, ANK repeat and PH domain-containing p                | ACAP2     | 1.47 | 2.14 | -0.16 | 0.53  | -2.60 | 0.57  | -0.44 | 0.18  | 0.02  | 0.33  | 0.93  | 0.63  |
| O00244 | Copper transport protein ATOX1                                                 | ATOX1     | 1.46 | 1.94 | -0.84 | 0.41  | -0.77 | -0.88 | 0.17  | 0.35  | -1.02 | 2.32  | -0.16 | 0.43  |
| P42126 | Enoyl-CoA delta isomerase 1, mitochondrial                                     | EC1       | 1.46 | 2.52 | -0.57 | -0.77 | 0.38  | -0.67 | -0.67 | -0.47 | -0.53 | 2.47  | 0.24  | 0.60  |
| P01619 | Immunoglobulin kappa variable 3-20                                             | IGKV3-20  | 1.46 | 1.46 | 0.95  | -1.65 | 0.51  | -1.65 | 0.28  | 0.96  | -0.26 | 1.01  | -0.46 | 0.31  |
| P50416 | Carnitine O-palmitoyltransferase 1, liver isoform                              | CPT1A     | 1.46 | 2.60 | -2.39 | 0.01  | 0.48  | -0.60 | 0.19  | 1.09  | -0.06 | 0.00  | 0.07  | 1.21  |
| Q8IX04 | Ubiquitin-conjugating enzyme E2 variant 3                                      | UEVLD     | 1.46 | 5.69 | -0.33 | -0.63 | -0.66 | 0.24  | -2.13 | 1.21  | 0.30  | 0.44  | 0.28  | 1.28  |
| Q03113 | Guanine nucleotide-binding protein subunit alpha-12                            | GNA12     | 1.46 | 2.05 | -0.36 | -0.28 | 0.45  | -0.37 | -1.41 | 1.33  | 1.22  | -1.58 | 0.19  | 0.81  |
| Q9UFN0 | Protein NipSnap homolog 3A                                                     | NIPSNAP3A | 1.46 | 1.42 | -0.96 | -1.17 | 1.22  | -0.71 | 0.13  | 1.05  | -0.66 | 1.70  | -0.16 | -0.43 |
| P04843 | Dolichyl-diphosphooligosaccharide--protein glycosyltransferase su              | RPN1      | 1.45 | 2.14 | -0.25 | -0.41 | -0.64 | -0.32 | -0.50 | 1.89  | -0.41 | -0.79 | -0.42 | 1.86  |
| P09668 | Pro-cathepsin H                                                                | CTSH      | 1.44 | 2.33 | -0.24 | -0.38 | -0.59 | -0.50 | -0.55 | -0.39 | -0.48 | 2.50  | -0.41 | 1.05  |
| P31937 | 3-hydroxyisobutyrate dehydrogenase, mitochondrial                              | HIBADH    | 1.44 | 1.77 | -0.48 | 0.89  | -0.87 | -0.57 | -0.74 | 0.17  | 2.29  | -0.64 | 0.55  |       |
| Q08345 | Epithelial discoidin domain-containing receptor 1                              | DDR1      | 1.44 | 1.59 | 1.01  | -1.17 | -1.35 | 0.45  | -0.57 | 1.52  | -1.13 | 0.42  | 0.14  | 0.67  |
| Q99707 | Methionine synthase                                                            | MTR       | 1.44 | 4.16 | -0.85 | 0.41  | -2.24 | -0.12 | -0.23 | 0.30  | 0.59  | 1.51  | 0.55  | 0.09  |
| Q9Y5P4 | Ceramide transfer protein                                                      | CERT      | 1.44 | 3.44 | 0.48  | -0.82 | -2.41 | 0.39  | -0.52 | 0.40  | 0.75  | 0.78  | 0.29  | 0.66  |
| P55001 | Microfibrillar-associated protein 2                                            | MFAP2     | 1.44 | 1.75 | 0.46  | -1.08 | 1.08  | -1.05 | -1.15 | 0.69  | 1.14  | 0.07  | -1.14 | 0.99  |
| P63098 | Calcineurin subunit B type 1                                                   | PPP3R1    | 1.43 | 1.52 | 0.91  | -1.10 | -1.27 | -1.04 | 0.92  | 1.22  | -0.14 | 1.22  | -0.64 | -0.09 |
| P61626 | Lysosome C                                                                     | LYZ       | 1.43 | 1.81 | -0.65 | -0.83 | -0.96 | -0.65 | 1.30  | -0.77 | -0.73 | 1.34  | 0.82  | 1.12  |

|         |                                                                 |            |      |      |       |       |       |       |       |       |       |       |       |       |
|---------|-----------------------------------------------------------------|------------|------|------|-------|-------|-------|-------|-------|-------|-------|-------|-------|-------|
| Q13867  | Bleomycin hydrolase                                             | BLMH       | 1.42 | 2.04 | -0.52 | -1.24 | -0.61 | 0.09  | 0.30  | -0.16 | -0.98 | 2.33  | 0.36  | 0.43  |
| P56537  | Eukaryotic translation initiation factor 6                      | EIF6       | 1.42 | 2.05 | 0.40  | -0.45 | -1.13 | -0.91 | 0.12  | 1.09  | -0.83 | 1.04  | -0.95 | 1.63  |
| P02788  | Lactotransferrin                                                | LTF        | 1.41 | 4.61 | -0.87 | 0.10  | -1.10 | -0.52 | -0.84 | 1.01  | 1.93  | 0.92  | 0.04  | -0.67 |
| Q9UIA9  | Exportin-7                                                      | XP07       | 1.41 | 5.40 | -0.36 | -0.66 | -0.87 | -0.03 | -1.49 | 0.08  | 1.31  | 1.85  | -0.31 | 0.48  |
| Q15417  | Calponin-3                                                      | CNN3       | 1.41 | 5.92 | 0.14  | -1.41 | -0.80 | -0.34 | -1.08 | 1.30  | 0.26  | -0.47 | 0.87  | 1.53  |
| P78559  | Microtubule-associated protein 1A                               | MAP1A      | 1.41 | 2.66 | -0.26 | -0.61 | -0.65 | -0.29 | -0.65 | -1.19 | 0.97  | 1.72  | -0.49 | 1.45  |
| Q8BWWH5 | Probable tRNA pseudouridine synthase 1                          | TRUB1      | 1.41 | 1.76 | -1.46 | -1.59 | -0.26 | 0.30  | 1.24  | 0.05  | -0.63 | 0.90  | 0.26  | 1.18  |
| Q14203  | Dynactin subunit 1                                              | DCTN1      | 1.41 | 2.10 | -1.15 | -0.15 | -0.35 | -0.44 | 0.03  | -0.65 | -0.16 | 0.83  | -0.43 | 2.46  |
| Q16666  | Gamma-interferon-inducible protein 16                           | IFI16      | 1.41 | 1.35 | 0.91  | -2.71 | -0.09 | 0.33  | 0.05  | 0.49  | 0.61  | 0.15  | 0.26  | 0.01  |
| Q15459  | Splicing factor 3A subunit 1                                    | SF3A1      | 1.41 | 2.81 | -0.18 | -0.69 | -2.15 | -0.30 | 0.93  | 1.53  | 0.60  | -0.11 | -0.03 | 0.42  |
| A6NDG6  | Glycerol-3-phosphate phosphatase                                | PGP        | 1.40 | 2.53 | 1.14  | -1.47 | -0.08 | -0.27 | -1.57 | 0.34  | 0.08  | 1.63  | -0.22 | 0.42  |
| Q8NBR6  | Ubiquitin carboxyl-terminal hydrolase MINDY-2                   | MINDY2     | 1.40 | 4.75 | -0.07 | -0.27 | -2.12 | 0.23  | -0.98 | 1.17  | 0.28  | 0.08  | 0.31  | 1.37  |
| Q8TD19  | Serine/threonine-protein kinase Nek9                            | NEK9       | 1.40 | 2.93 | -0.63 | 0.79  | -1.87 | 0.10  | -0.83 | 1.30  | 1.03  | -0.73 | 0.13  | 0.70  |
| Q9NPB8  | Glycerophosphocholine phosphodiesterase GPCPD1                  | GPCPD1     | 1.40 | 2.46 | 0.90  | -1.71 | 0.11  | -0.30 | -1.17 | 0.88  | 1.57  | -0.25 | -0.48 | 0.47  |
| P20472  | Parvalbumin alpha                                               | PVALB      | 1.40 | 1.73 | -0.32 | 0.03  | -0.59 | -0.47 | -0.46 | -0.50 | -0.41 | 2.68  | -0.48 | 0.53  |
| Q9NR19  | Acetyl-coenzyme A synthetase, cytoplasmic                       | ACSS2      | 1.39 | 1.95 | -0.59 | 0.24  | -2.35 | 0.47  | 0.32  | 0.39  | -0.51 | 1.46  | 0.46  | 0.10  |
| Q9UN52  | COP9 signalosome complex subunit 3                              | COPS3      | 1.39 | 1.94 | 1.27  | -0.71 | -0.86 | -0.76 | -0.82 | -0.72 | 1.26  | 1.30  | -0.73 | 0.77  |
| P35219  | Carbonic anhydrase-related protein                              | CA8        | 1.38 | 2.19 | -0.65 | -0.71 | -1.00 | 1.05  | -0.71 | -0.75 | -0.77 | 1.00  | 1.14  | 1.41  |
| P06702  | Protein S100A9                                                  | S100A9     | 1.38 | 1.91 | 0.95  | -0.37 | -2.02 | -0.89 | 0.46  | 0.31  | 0.43  | 1.42  | -0.66 | 0.37  |
| P00505  | Aspartate aminotransferase, mitochondrial                       | GOT2       | 1.38 | 1.63 | -1.08 | 0.41  | 0.22  | -0.86 | -0.37 | -0.44 | -0.89 | 2.13  | -0.20 | 1.09  |
| Q9Y216  | Myotubularin-related protein 7                                  | MTMR7      | 1.38 | 1.95 | -1.32 | 0.36  | -0.06 | 1.12  | -2.04 | -0.23 | 0.59  | -0.03 | 0.86  | 0.76  |
| Q99613  | Eukaryotic translation initiation factor 3 subunit C            | EIF3C      | 1.38 | 2.85 | 0.66  | -0.65 | -1.46 | -0.44 | -0.52 | 1.02  | 1.82  | -0.74 | -0.38 | 0.69  |
| O43660  | Pleiotropic regulator 1                                         | PLRG1      | 1.38 | 1.58 | -0.46 | -1.52 | -0.63 | 0.31  | 0.67  | -0.37 | 2.12  | -0.28 | 0.72  | -0.57 |
| P00492  | Hypoxanthine-guanine phosphoribosyltransferase                  | HPRT1      | 1.37 | 2.11 | -0.66 | -0.48 | -0.20 | -0.25 | -0.53 | -0.83 | 0.87  | 2.53  | -0.14 | -0.33 |
| Q40763  | Signal transducer and activator of transcription 3              | STAT3      | 1.37 | 1.34 | 0.69  | -0.22 | -2.58 | 0.22  | 0.40  | 0.97  | 0.60  | -0.47 | 0.11  | 0.27  |
| P09234  | U1 small nuclear ribonucleoprotein C                            | SNRPC      | 1.37 | 1.11 | -0.94 | -1.03 | 0.31  | 0.51  | -0.11 | -0.99 | -1.02 | 0.24  | 1.47  | 1.57  |
| Q93954  | Protein farnesyltransferase/geranyltransferase type-1 subunit A | FNTA       | 1.37 | 6.64 | -0.42 | -0.91 | -1.03 | -0.74 | -0.84 | 2.11  | 0.01  | 0.61  | 0.32  | 0.88  |
| Q5QJ74  | Tubulin-specific chaperone cofactor E-like protein              | TBCLE      | 1.37 | 2.43 | 1.01  | -2.13 | -0.90 | 0.01  | -0.20 | 1.43  | -0.25 | 0.26  | 0.18  | 0.60  |
| P0D0X2  | Immunoglobulin alpha-2 heavy chain                              | IGHA2      | 1.37 | 2.75 | -1.92 | 0.41  | -0.48 | 0.15  | -0.49 | 2.03  | -0.38 | 0.58  | -0.13 | 0.25  |
| Q5VWQ8  | Disabled homolog 2-interacting protein                          | DAB2IP     | 1.37 | 2.45 | -0.02 | 0.20  | -0.34 | -0.04 | -1.98 | 1.72  | 1.11  | -0.79 | -0.14 | 0.27  |
| P47897  | Glutamine-tRNA ligase                                           | QARS       | 1.36 | 3.80 | 0.40  | -0.83 | 0.00  | -0.19 | -2.27 | 1.32  | 0.38  | 0.64  | -0.23 | 0.77  |
| Q14515  | SPARC-like protein 1                                            | SPARCL1    | 1.36 | 1.13 | 1.35  | -0.55 | -1.10 | -0.78 | -0.17 | 1.37  | 1.12  | 0.53  | -1.08 | -0.68 |
| P28370  | Probable global transcription activator SNF2L1                  | SMARCA1    | 1.36 | 3.35 | 0.15  | -1.52 | -1.18 | -0.24 | 0.16  | 0.58  | 2.16  | 0.28  | -0.33 | -0.06 |
| P49137  | MAP kinase-activated protein kinase 2                           | MAPKAPK2   | 1.36 | 1.44 | 1.09  | -1.03 | -1.16 | 0.63  | -1.05 | 1.32  | 0.49  | -1.20 | 0.25  | 0.65  |
| P08754  | Guanine nucleotide-binding protein G(i) subunit alpha           | GNAI3      | 1.35 | 3.02 | -0.17 | 0.24  | -0.70 | 0.37  | -2.23 | 1.15  | -0.22 | -0.35 | 0.84  | 1.07  |
| Q96QK1  | Vacuolar protein sorting-associated protein 35                  | VPS35      | 1.35 | 3.30 | -1.04 | 0.55  | 0.06  | -0.36 | -1.81 | 1.13  | 1.44  | -0.67 | 0.04  | 0.66  |
| P04040  | Catalase                                                        | CAT        | 1.35 | 3.64 | 0.30  | -1.52 | 0.27  | -0.79 | -1.00 | 0.90  | 0.03  | 1.99  | -0.32 | 0.15  |
| O60271  | C-Jun-amino-terminal kinase-interacting protein 4               | SPAG9      | 1.34 | 0.67 | 1.39  | -0.15 | -0.74 | -0.63 | -0.69 | 1.22  | 1.66  | -0.78 | -0.62 | -0.65 |
| P12111  | Collagen alpha-3(VI) chain                                      | COL6A3     | 1.34 | 3.31 | -0.33 | -0.44 | 0.61  | -1.21 | -1.24 | 0.72  | 1.95  | -0.28 | -0.56 | 0.78  |
| P26038  | Moesin                                                          | MSN        | 1.34 | 4.95 | 0.07  | -1.40 | 0.02  | -0.23 | -1.66 | 1.93  | 0.15  | 0.39  | 0.20  | 0.53  |
| Q68DK2  | Zinc finger FYVE domain-containing protein 26                   | ZFYVE26    | 1.34 | 1.96 | -0.56 | -0.70 | -0.77 | -0.59 | 0.69  | 1.75  | -0.74 | -1.08 | 0.92  | 1.07  |
| P01042  | Kininogen-1                                                     | KNG1       | 1.33 | 1.88 | 0.95  | -1.72 | 0.89  | -0.52 | -1.48 | 0.70  | 0.79  | 0.23  | -0.51 | 0.67  |
| Q9P286  | Serine/threonine-protein kinase PAK 5                           | PAK5       | 1.33 | 3.02 | 0.23  | -0.63 | -2.48 | 0.25  | 0.07  | 0.66  | 0.89  | 0.94  | 0.36  | -0.29 |
| P25325  | 3-mercaptopyruvate sulfurtransferase                            | MPST       | 1.33 | 3.94 | 0.31  | -1.03 | -0.04 | -0.20 | -1.89 | 0.93  | 0.28  | 1.51  | 0.76  | -0.63 |
| Q9NQ48  | Leucine zipper transcription factor-like protein 1              | LZTF1      | 1.33 | 2.84 | -0.70 | -0.53 | -0.48 | 0.17  | -0.95 | 0.34  | 2.58  | -0.32 | 0.22  | -0.33 |
| Q15049  | Membrane protein MLC1                                           | MLC1       | 1.33 | 4.23 | -0.34 | -1.51 | -0.38 | -0.17 | -0.67 | 0.86  | -0.96 | 1.75  | 0.36  | 1.05  |
| O75131  | Copine-3                                                        | CPNE3      | 1.33 | 1.86 | 0.17  | -1.25 | -0.56 | 0.21  | -0.42 | 1.78  | -1.57 | 0.09  | 0.65  | 0.90  |
| P11217  | Glycogen phosphorylase, muscle form                             | PYGM       | 1.32 | 3.90 | -0.21 | -1.20 | -0.21 | -0.24 | -1.09 | 1.94  | 0.39  | -0.42 | -0.37 | 1.41  |
| P48163  | NADP-dependent malic enzyme                                     | ME1        | 1.32 | 4.38 | -0.43 | -1.66 | -0.02 | -0.89 | -0.04 | 1.10  | 0.77  | 1.69  | -0.74 | 0.23  |
| P54920  | Alpha-soluble NSF attachment protein                            | NAPA       | 1.32 | 4.60 | -2.33 | -0.74 | -0.52 | 0.10  | 0.20  | 1.01  | 0.89  | 0.14  | 0.46  | 0.81  |
| Q4G0X4  | BTB/POZ domain-containing protein KCTD21                        | KCTD21     | 1.32 | 2.25 | -0.39 | -0.63 | -0.90 | 0.52  | -0.72 | 1.87  | -0.70 | -0.99 | 0.88  | 1.05  |
| O94760  | N(G),N(G)-dimethylarginine dimethylaminohydrolase 1             | DDAH1      | 1.32 | 3.71 | -0.18 | -1.09 | -1.64 | -0.65 | 0.78  | 0.51  | 0.95  | 1.67  | -0.36 | 0.01  |
| P09525  | Annexin A4                                                      | ANXA4      | 1.32 | 2.12 | -0.07 | -0.07 | 0.04  | -0.57 | -1.36 | 0.51  | -1.28 | 1.58  | -0.30 | 1.52  |
| Q13491  | Neuronal membrane glycoprotein M6-b                             | GPMB6      | 1.31 | 3.05 | -0.43 | -1.04 | -0.98 | 0.80  | -0.85 | -0.16 | -0.45 | 1.83  | 1.36  | -0.08 |
| Q9HD42  | Charged multivesicular body protein 1a                          | CHMP1A     | 1.31 | 2.59 | 1.38  | -0.18 | -1.31 | -1.81 | -0.44 | 0.50  | 0.60  | 1.09  | 0.22  | -0.05 |
| O95825  | Quinone oxidoreductase-like protein 1                           | CRYZL1     | 1.31 | 0.85 | 1.49  | -1.09 | -0.10 | -0.20 | -1.12 | 1.15  | 1.45  | -0.51 | -0.47 | -0.61 |
| P35240  | Merlin                                                          | NF2        | 1.31 | 2.73 | -0.33 | 0.58  | -1.60 | 0.48  | -1.46 | 1.25  | 0.62  | -0.88 | 0.62  | 0.72  |
| P47895  | Aldehyde dehydrogenase family 1 member A3                       | ALDH1A3    | 1.30 | 2.85 | -0.35 | -0.40 | -0.81 | -0.42 | -0.60 | 0.91  | 0.15  | 2.49  | -0.58 | -0.40 |
| Q16816  | Phosphorylase b kinase gamma catalytic chain, skeletal muscle/f | PHKG1      | 1.30 | 2.54 | 0.22  | -0.07 | -2.68 | 0.43  | -0.25 | 0.97  | 0.39  | 0.13  | 0.52  | 0.36  |
| Q9H223  | BH domain-containing protein 4                                  | BHD4       | 1.30 | 3.59 | -0.15 | 0.89  | -1.28 | -0.46 | -1.78 | 1.24  | -0.03 | -0.02 | 0.35  | 1.24  |
| Q96NY7  | Chloride intracellular channel protein 6                        | CLIC6      | 1.30 | 1.03 | 0.49  | 0.46  | -0.64 | -0.94 | -0.57 | 0.04  | 0.61  | -0.69 | -1.01 | 2.25  |
| Q61A00  | Dehydrogenase/reductase SDR family member 7B                    | DHRS7B     | 1.30 | 2.17 | -0.33 | -0.46 | -0.61 | -0.35 | -0.41 | -0.34 | -0.35 | -0.85 | 1.51  | 2.19  |
| Q9NZU5  | LIM and cysteine-rich domains protein 1                         | LMCD1      | 1.30 | 2.13 | -1.06 | 0.36  | -1.51 | 0.46  | -0.34 | 1.02  | -1.39 | 0.64  | 0.70  | 1.13  |
| P12271  | Retinaldehyde-binding protein 1                                 | RLBP1      | 1.29 | 3.08 | -0.49 | 0.19  | -2.51 | 0.60  | -0.44 | 0.84  | 0.56  | 0.16  | 0.22  | 0.88  |
| Q14152  | Eukaryotic translation initiation factor 3 subunit A            | EIF3A      | 1.29 | 3.57 | -0.78 | -0.87 | -0.50 | -0.54 | -0.24 | 2.10  | 0.74  | -0.62 | -0.49 | 1.20  |
| Q8NDH3  | Probable aminopeptidase NPEPL1                                  | NPEPL1     | 1.29 | 2.30 | 0.68  | -2.45 | -0.29 | -0.09 | 0.01  | 0.54  | 1.13  | 0.84  | 0.04  | -0.41 |
| P48539  | Calmodulin regulator protein PCP4                               | PCP4       | 1.29 | 2.66 | -0.31 | -0.43 | -0.63 | -0.54 | -0.57 | -0.44 | -0.41 | 2.14  | -0.43 | 1.61  |
| Q8NF24  | Neuroigin-2                                                     | NLG2       | 1.29 | 0.99 | 1.66  | -0.39 | -1.18 | -0.10 | -1.14 | 1.29  | 1.06  | -0.16 | -0.36 | -0.68 |
| P27986  | Phosphatidylinositol 3-kinase regulatory subunit alpha          | PIK3R1     | 1.29 | 3.34 | -0.14 | -1.13 | -1.17 | -0.60 | 0.38  | 1.13  | 1.83  | 0.02  | 0.59  | -0.92 |
| Q01433  | AMP deaminase 2                                                 | AMPD2      | 1.29 | 2.03 | 0.78  | 0.32  | -1.03 | -0.55 | -1.45 | 0.57  | 0.82  | 1.63  | -1.08 | -0.02 |
| Q9NSY1  | BMP-2-inducible protein kinase                                  | BMP2K      | 1.28 | 2.18 | 0.29  | 0.69  | -0.93 | 0.06  | -2.15 | 1.08  | 0.10  | -0.59 | 0.30  | 1.16  |
| Q9NUY8  | TBC1 domain family member 23                                    | TBC1D23    | 1.28 | 1.49 | -0.60 | 0.10  | -1.25 | -0.32 | 0.49  | 1.60  | 0.93  | -1.63 | 0.79  | -0.11 |
| O76071  | Probable cytosolic iron-sulfur protein assembly protein CIAO1   | CIAO1      | 1.28 | 1.89 | 0.62  | -0.02 | -2.42 | 0.42  | -0.46 | 0.47  | 0.49  | -0.70 | 0.61  | 1.01  |
| Q8N145  | Leucine-rich repeat LGI family member 3                         | LGI3       | 1.28 | 1.09 | -1.83 | -0.32 | 0.98  | 0.63  | -0.70 | -1.29 | 0.08  | 0.97  | 0.74  | 0.74  |
| P13716  | Delta-aminolevulinic acid dehydratase                           | ALAD       | 1.28 | 3.61 | -0.73 | -1.17 | -0.09 | -0.47 | -0.43 | 1.02  | -0.95 | 2.11  | 0.51  | 0.21  |
| Q9Y6G9  | Cytoplasmic dynein 1 light intermediate chain 1                 | DYNLC11    | 1.28 | 3.21 | -0.93 | -0.10 | -0.15 | -0.98 | -0.53 | 0.48  | 1.87  | -0.23 | -0.92 | 1.50  |
| Q9Y365  | START domain-containing protein 10                              | STARTD10   | 1.28 | 1.11 | 0.65  | -0.57 | -1.16 | 0.09  | -0.28 | 1.71  | 1.31  | -1.46 | -0.06 | -0.23 |
| Q5SGD2  | Protein phosphatase 1L                                          | PPM1L      | 1.27 | 2.26 | 0.58  | -0.76 | -2.61 | 0.31  | 0.26  | 0.56  | 0.16  | 0.61  | 0.52  | 0.35  |
| Q96D46  | 60S ribosomal export protein NMD3                               | NMD3       | 1.27 | 2.54 | 0.46  | -0.34 | -2.66 | 0.07  | 0.11  | 0.84  | 0.18  | 0.05  | 0.63  | 0.65  |
| Q92945  | Far upstream element-binding protein 2                          | KHSRP      | 1.27 | 2.79 | -0.17 | 0.72  | -2.06 | -0.15 | -0.71 | 0.51  | -0.09 | 1.65  | -0.42 | 0.72  |
| P0DP03  | Immunoglobulin heavy variable 3-30-5                            | IGHV3-30-5 | 1.27 | 1.17 | -0.99 | -1.05 | 0.57  | 0.45  | -0.28 | -1.03 | -1.04 | 1.57  | 0.76  | 1.05  |
| Q9Y696  | Chloride intracellular channel protein 4                        | CLIC4      | 1.27 | 3.14 | -1.19 | -0.79 | 0.14  | 0.73  | -1.41 | 1.61  | -0.67 | -0.07 | 0.80  | 0.87  |
| O00471  | Exocyst complex component 5                                     | EXOC5      | 1.27 | 1.59 | -1.14 | 0.30  | -1.36 | 0.71  | -0.14 | 0.35  | 1.03  | -1.53 | 0.63  | 1.14  |



|        |                                                                           |           |      |      |       |       |       |       |       |       |       |       |       |       |
|--------|---------------------------------------------------------------------------|-----------|------|------|-------|-------|-------|-------|-------|-------|-------|-------|-------|-------|
| P06396 | Gelsolin                                                                  | GSN       | 1.26 | 3.14 | -0.75 | 0.40  | -0.29 | -0.04 | -1.84 | 2.00  | 0.03  | -0.36 | 0.04  | 0.82  |
| A0JNW5 | UHRF1-binding protein 1-like                                              | UHRF1BP1L | 1.26 | 1.67 | 0.60  | 0.05  | -2.18 | 0.67  | -0.85 | -0.34 | 0.78  | -0.38 | 0.34  | 1.31  |
| Q96DB2 | Histone deacetylase 11                                                    | HDAC11    | 1.26 | 0.78 | 0.72  | -0.38 | -0.51 | -0.40 | -0.39 | -0.37 | 2.65  | -0.57 | -0.40 | -0.35 |
| Q9H4A3 | Serine/threonine-protein kinase WNK1                                      | WNK1      | 1.26 | 1.36 | 1.54  | -1.12 | -0.91 | -0.36 | -0.60 | 1.37  | 1.26  | -0.23 | -0.25 | -0.69 |
| U75925 | E3 SUMO-protein ligase PIAS1                                              | PIAS1     | 1.25 | 1.93 | 0.67  | -1.79 | -0.30 | -1.05 | 0.62  | 1.43  | -0.99 | 0.67  | 0.36  | 0.38  |
| Q5JSZ5 | Protein PRRC2B                                                            | PRRC2B    | 1.25 | 1.22 | 1.20  | -1.02 | -0.79 | -0.63 | -0.10 | 1.19  | 0.11  | -0.91 | -0.71 | 1.66  |
| Q7KZF4 | Staphylococcal nuclease domain-containing protein 1                       | SDN1      | 1.25 | 2.58 | -1.27 | -0.17 | -0.09 | -0.57 | -0.24 | 0.39  | -0.50 | 2.51  | -0.39 | 0.33  |
| P42566 | Epidermal growth factor receptor substrate 15                             | EPS15     | 1.25 | 2.05 | 0.12  | -0.20 | -2.67 | 0.24  | 0.49  | 0.76  | 0.02  | -0.06 | 0.86  | 0.44  |
| Q9B5T9 | Rhotein                                                                   | RTKN      | 1.24 | 1.59 | -1.10 | 0.52  | -1.44 | 0.22  | 0.17  | 0.35  | 1.03  | -1.53 | 0.51  | 1.27  |
| O00267 | Transcription elongation factor SPT5                                      | SUPT5H    | 1.24 | 1.19 | 0.87  | -1.79 | 0.27  | -1.28 | 0.61  | 1.14  | 0.33  | 0.60  | -1.05 | 0.31  |
| Q16513 | Serine/threonine-protein kinase N2                                        | PKN2      | 1.24 | 1.91 | 0.70  | -0.73 | -0.84 | -0.25 | -0.76 | 0.68  | -0.62 | -1.10 | 1.05  | 1.86  |
| Q9Y678 | Coatomer subunit gamma-1                                                  | COPG1     | 1.24 | 2.56 | -0.75 | -0.15 | -0.71 | 0.00  | -0.76 | 0.81  | 2.10  | -1.22 | -0.20 | 0.86  |
| O95248 | Myotubularin-related protein 5                                            | SBF1      | 1.24 | 1.71 | 0.87  | -0.50 | -0.80 | -0.65 | -0.66 | 1.06  | 2.13  | -0.78 | -0.42 | -0.25 |
| Q9ULL4 | Plexin-B3                                                                 | PLXNB3    | 1.24 | 3.43 | -0.33 | -0.63 | -0.87 | -0.46 | -0.59 | 1.50  | -0.56 | 1.83  | -0.74 | 0.85  |
| P28331 | NADH-ubiquinone oxidoreductase 75 kDa subunit, mitochondrial              | NDUFS1    | 1.24 | 1.03 | 0.89  | -0.70 | 0.10  | -0.92 | -0.56 | 1.70  | 1.28  | -1.13 | -0.85 | 0.19  |
| Q96DR7 | Rho guanine nucleotide exchange factor 26                                 | ARHGEP26  | 1.23 | 2.70 | -0.16 | -1.07 | -1.36 | 0.60  | -0.32 | 1.57  | -1.08 | 1.15  | 0.73  | -0.05 |
| Q9Y2E4 | Disco-interacting protein 2 homolog C                                     | DIP2C     | 1.23 | 2.83 | 0.45  | 0.27  | -2.41 | -0.13 | -0.62 | 1.38  | 0.71  | 0.24  | 0.18  | -0.06 |
| Q08945 | FACT complex subunit SSRP1                                                | SSRP1     | 1.23 | 1.33 | 1.53  | -1.25 | -0.11 | -0.85 | -0.76 | 1.52  | -0.48 | 0.70  | -0.76 | 0.45  |
| P61326 | Protein mago nashi homolog                                                | MAGO H    | 1.23 | 2.97 | 0.51  | -1.85 | -1.56 | 0.46  | -0.07 | 0.17  | -0.38 | 1.01  | 0.88  | 0.84  |
| Q16656 | Nuclear respiratory factor 1                                              | NRF1      | 1.23 | 1.61 | -0.84 | -0.97 | -1.14 | 0.16  | 1.16  | -1.10 | -0.29 | 0.54  | 1.29  | 1.20  |
| P51153 | Ras-related protein Rab-13                                                | RAB13     | 1.23 | 2.26 | -0.61 | 0.85  | -0.97 | -0.77 | -0.59 | 0.92  | 0.05  | -1.37 | 0.92  | 1.56  |
| Q9UL18 | Protein argonaute-1                                                       | AGO1      | 1.22 | 1.00 | -1.30 | -0.18 | 0.31  | -0.05 | 0.06  | -1.75 | 0.38  | 1.95  | 0.27  | 0.33  |
| Q96HH9 | GRAM domain-containing protein 2B                                         | GRAMD2B   | 1.22 | 1.14 | -0.61 | -1.53 | -0.75 | 0.92  | 0.70  | 0.84  | -0.72 | -0.93 | 0.80  | 1.28  |
| Q96D96 | Voltage-gated hydrogen channel 1                                          | HVCN1     | 1.22 | 1.72 | 0.63  | -0.68 | -0.36 | -0.69 | -0.68 | 0.98  | -0.65 | -1.01 | 0.31  | 2.14  |
| Q16650 | T-box brain protein 1                                                     | TBR1      | 1.22 | 1.43 | 1.18  | -0.43 | -0.98 | -0.59 | -0.68 | 1.11  | 1.46  | 0.74  | -0.67 | -1.13 |
| O14558 | Heat shock protein beta-6                                                 | HSPB6     | 1.22 | 1.86 | -0.17 | 0.47  | -1.33 | -0.13 | -0.68 | 1.97  | -1.05 | -0.45 | 0.26  | 1.11  |
| Q06187 | Tyrosine-protein kinase BTK                                               | BTK       | 1.22 | 2.19 | -1.41 | 0.16  | -0.51 | -0.76 | 0.48  | 2.16  | 0.80  | -0.05 | -0.11 | -0.76 |
| Q08AF3 | Schlafen family member 5                                                  | SLFN5     | 1.21 | 1.55 | 1.28  | -0.02 | -1.03 | -0.89 | -0.93 | 0.92  | 1.45  | -0.43 | -1.02 | 0.68  |
| P34931 | Heat shock 70 kDa protein 1-like                                          | HSPA1L    | 1.21 | 1.34 | -0.20 | -0.25 | -0.46 | -0.24 | -0.35 | -0.20 | -0.25 | -0.56 | -0.31 | 2.83  |
| Q9P0S3 | ORM1-like protein 1                                                       | ORMDL1    | 1.21 | 1.24 | -0.61 | 1.49  | -0.86 | -0.62 | -0.76 | -0.71 | 0.62  | -0.96 | 1.12  | 1.29  |
| Q5T9C2 | Protein FAM102A                                                           | FAM102A   | 1.21 | 1.75 | 0.38  | 0.20  | -1.24 | 0.02  | -1.11 | 1.67  | 1.15  | -1.37 | 0.04  | 0.26  |
| Q96FZ7 | Charged multivesicular body protein 6                                     | CHMP6     | 1.20 | 1.41 | 1.39  | -0.76 | -0.99 | -0.36 | -0.77 | 0.66  | 1.77  | -1.00 | -0.28 | 0.33  |
| P67936 | Tropomyosin alpha-4 chain                                                 | TPM4      | 1.20 | 2.64 | -1.66 | 0.57  | -0.61 | -0.03 | -0.55 | 0.11  | 1.79  | 1.27  | -0.31 | -0.58 |
| O43776 | Asparagine--tRNA ligase, cytoplasmic                                      | NARS      | 1.20 | 4.74 | 0.19  | -2.03 | -0.80 | 0.39  | -1.03 | 1.13  | 1.11  | 0.08  | 0.55  | 0.41  |
| O43175 | D-3-phosphoglycerate dehydrogenase                                        | PHGDH     | 1.20 | 4.44 | -0.78 | -0.74 | -0.45 | 0.20  | -1.35 | 2.07  | -0.41 | -0.14 | 0.67  | 0.93  |
| Q43929 | Origin recognition complex subunit 4                                      | ORC4      | 1.20 | 1.77 | 0.79  | -1.04 | 0.75  | -1.12 | -1.13 | 0.38  | -0.09 | 1.01  | 1.44  | -0.98 |
| Q9H054 | Probable ATP-dependent RNA helicase DDX47                                 | DDX47     | 1.20 | 2.64 | 1.00  | -0.70 | -1.07 | -0.71 | -0.81 | 0.25  | 2.01  | 0.54  | -0.86 | 0.35  |
| Q14353 | Guanidinoacetate N-methyltransferase                                      | GAMT      | 1.19 | 2.75 | 0.69  | -1.45 | -0.66 | 0.53  | -1.45 | 1.30  | 0.14  | -0.72 | 0.65  | 0.98  |
| O95864 | Acyl-CoA 6-desaturase                                                     | FADS2     | 1.19 | 1.84 | 0.71  | -1.46 | -1.63 | 1.02  | -0.48 | 0.82  | 0.42  | -0.43 | 1.18  | -0.16 |
| Q96DF8 | Splicing factor ESS-2 homolog                                             | ESS2      | 1.19 | 2.65 | -0.23 | -0.50 | -0.72 | -0.55 | -0.46 | -0.53 | -0.42 | 1.93  | 1.83  | -0.36 |
| Q86T12 | Dipeptidyl peptidase 9                                                    | DPP9      | 1.19 | 1.40 | 1.15  | -0.81 | -0.65 | -0.25 | -0.94 | 1.69  | 1.35  | -0.22 | -0.54 | -0.79 |
| Q9UK22 | F-box only protein 2                                                      | FBXO2     | 1.19 | 3.05 | -0.73 | -0.53 | -0.40 | 0.36  | -1.26 | 1.65  | 0.58  | -1.24 | 0.28  | 1.28  |
| Q12846 | Syntaxin-4                                                                | STX4      | 1.19 | 1.92 | 0.29  | 0.37  | -0.48 | -0.04 | -1.99 | 1.27  | 0.69  | -1.32 | 0.59  | 0.63  |
| Q96CN7 | Isochorismatase domain-containing protein 1                               | ISOC1     | 1.18 | 1.24 | -0.57 | -0.68 | 0.53  | 0.04  | -0.71 | -0.73 | -0.69 | 2.50  | 0.39  | -0.08 |
| Q15428 | Splicing factor 3A subunit 2                                              | SF3A2     | 1.18 | 2.03 | 1.43  | -0.90 | -1.55 | -0.20 | -0.72 | 1.02  | 1.31  | -0.62 | 0.05  | 0.18  |
| Q86U86 | Protein polybromo-1                                                       | PBRM1     | 1.18 | 2.21 | 0.06  | -1.13 | -1.20 | -0.99 | 1.23  | 0.50  | 0.53  | 1.25  | 0.79  | -1.03 |
| Q726B0 | Coiled-coil domain-containing protein 91                                  | CCCD91    | 1.18 | 2.33 | 1.03  | -0.95 | -0.61 | -1.14 | -0.45 | 1.40  | 1.19  | -0.88 | -0.48 | 0.89  |
| P62304 | Small nuclear ribonucleoprotein E                                         | SNRPE     | 1.18 | 1.18 | -1.33 | 0.53  | 0.55  | 0.41  | -1.46 | -1.43 | 0.33  | 0.75  | 0.47  | 1.19  |
| Q16537 | Serine/threonine-protein phosphatase 2A 56 kDa regulatory subunit PPP2R5E | PPP2R5E   | 1.18 | 1.93 | -1.00 | -0.72 | -0.56 | -1.09 | 1.51  | -1.06 | 0.43  | 1.27  | 0.58  | 0.65  |
| O15160 | DNA-directed RNA polymerases I and III subunit RPAC1                      | POLR1C    | 1.18 | 1.78 | 1.20  | -1.45 | -1.78 | 0.56  | -0.33 | -0.38 | 0.60  | 1.07  | 0.45  | 0.07  |
| Q99536 | Synaptic vesicle membrane protein VAT-1 homolog                           | VAT1      | 1.18 | 2.38 | 1.03  | -1.51 | 0.14  | -0.27 | -1.55 | 1.19  | 1.30  | -0.20 | -0.01 | -0.13 |
| Q13107 | Ubiquitin carboxyl-terminal hydrolase 4                                   | USP4      | 1.17 | 1.61 | 0.24  | -0.90 | -1.13 | 0.34  | -0.22 | 0.59  | 2.22  | -1.19 | 0.00  | 0.05  |
| Q9H469 | F-box/LRR-repeat protein 15                                               | FBXL15    | 1.17 | 0.96 | 1.22  | -1.11 | -1.22 | 0.08  | -0.09 | 1.37  | 1.11  | -1.26 | 0.12  | -0.23 |
| Q15173 | Serine/threonine-protein phosphatase 2A 56 kDa regulatory subunit PPP2R5B | PPP2R5B   | 1.17 | 3.00 | 1.08  | -1.10 | -1.78 | -0.01 | -0.70 | 1.68  | 0.22  | 0.20  | 0.14  | 0.27  |
| Q8NEU8 | DCC-interacting protein 13-beta                                           | APPL2     | 1.17 | 3.02 | 0.06  | -0.56 | -1.71 | 0.34  | -0.61 | 1.53  | -0.46 | -0.60 | 0.58  | 1.42  |
| P53990 | IST1 homolog                                                              | IST1      | 1.17 | 4.16 | -1.79 | -0.94 | -0.64 | -0.39 | 0.81  | 0.49  | -0.38 | 1.52  | 0.46  | 0.89  |
| Q12904 | Aminoacyl tRNA synthase complex-interacting multifunctional protein 1     | AIMP1     | 1.17 | 2.86 | -0.19 | -1.05 | 0.03  | -0.75 | -0.55 | 0.37  | 1.60  | -0.97 | -0.30 | 1.80  |
| Q03013 | Glutathione S-transferase Mu 4                                            | GSTM4     | 1.17 | 1.13 | 0.73  | -1.38 | -0.89 | 0.57  | -0.30 | 0.93  | 1.04  | -1.69 | 0.31  | 0.67  |
| Q9HBL8 | NmrA-like family domain-containing protein 1                              | NMRAL1    | 1.16 | 0.93 | 1.26  | -0.60 | -1.47 | 0.07  | -0.35 | 1.04  | 1.09  | -1.51 | 0.46  | 0.00  |
| Q6ZUJ8 | Phosphoinositide 3-kinase adapter protein 1                               | PIK3AP1   | 1.16 | 1.86 | -0.27 | 0.12  | 0.70  | -1.11 | -1.27 | 0.48  | 0.08  | 0.68  | -1.25 | 1.83  |
| Q96115 | Selenocysteine lyase                                                      | SCLY      | 1.16 | 2.23 | -0.32 | -0.49 | -0.64 | -0.30 | -0.44 | -0.42 | -0.34 | 2.62  | 0.78  | -0.44 |
| P58546 | Myotrophin                                                                | MTPN      | 1.16 | 5.45 | -0.66 | 0.42  | -0.34 | -1.25 | -1.51 | 1.10  | 1.07  | 1.12  | -0.61 | 0.66  |
| P51003 | Poly(A) polymerase alpha                                                  | PAPOLA    | 1.16 | 2.39 | -1.47 | -1.62 | 0.75  | 0.60  | -0.42 | -0.05 | -0.18 | 1.65  | 0.58  | 0.16  |
| O75052 | Carboxyl-terminal PDZ ligand of neuronal nitric oxide synthase protein 1  | NOS1AP    | 1.16 | 1.43 | -0.90 | 0.40  | 1.12  | -1.04 | -1.08 | 0.89  | 1.30  | -1.35 | 0.27  | 0.39  |
| Q9NTJ4 | Alpha-mannosidase 2C1                                                     | MAN2C1    | 1.15 | 1.04 | -0.85 | 0.19  | -1.16 | 0.12  | 0.50  | -1.01 | -1.00 | 1.96  | 0.70  | 0.54  |
| O14782 | Kinesin-like protein KIF3C                                                | KIF3C     | 1.15 | 1.88 | -0.65 | -0.08 | -2.33 | 0.62  | 0.57  | -0.33 | 0.03  | 0.26  | 0.47  | 1.43  |
| Q8WUM4 | Programmed cell death 6-interacting protein                               | PDCD6IP   | 1.15 | 7.22 | -1.15 | -0.11 | -0.17 | -0.74 | -1.57 | 1.16  | 1.45  | 0.79  | -0.33 | 0.67  |
| Q5TC84 | Opioid growth factor receptor-like protein 1                              | OGFRLL1   | 1.15 | 2.46 | -1.14 | 0.72  | -1.39 | -0.21 | -0.17 | 1.79  | 0.59  | -1.10 | 0.53  | 0.38  |
| P49189 | 4-trimethylaminobutyraldehyde dehydrogenase                               | ALDH9A1   | 1.15 | 2.93 | -0.48 | -1.14 | 0.09  | -0.22 | -0.79 | 1.16  | -0.65 | 2.24  | -0.11 | -0.11 |
| P04733 | Metallothionein-1F                                                        | MT1F      | 1.15 | 1.81 | -0.19 | 0.05  | -0.70 | -0.45 | -0.58 | 0.69  | -0.67 | 2.57  | -0.60 | -0.11 |
| Q9NZ39 | Diphosphoinositol polyphosphate phosphohydrolase 2                        | NUDT4     | 1.15 | 4.21 | -1.53 | 0.64  | -1.33 | -1.45 | 0.41  | 0.80  | 0.68  | 0.50  | 0.59  | 0.69  |
| O15040 | Tectonin beta-propeller repeat-containing protein 2                       | TECPR2    | 1.15 | 1.57 | 1.22  | -0.43 | -1.61 | -0.05 | -0.74 | 1.63  | 1.07  | -0.37 | -0.39 | -0.33 |
| Q9NUQ7 | Ufm1-specific protease 2                                                  | UFSF2     | 1.15 | 2.21 | -0.81 | 0.28  | -2.02 | 0.76  | -0.25 | 0.74  | -0.69 | -0.01 | 0.50  | 1.51  |
| P07108 | Acyl-CoA-binding protein                                                  | DBI       | 1.15 | 1.86 | -1.77 | 0.59  | -0.39 | -0.65 | 0.40  | 0.49  | 0.00  | 2.01  | -0.71 | 0.03  |
| Q86UP2 | Kinectin                                                                  | KTN1      | 1.15 | 1.91 | 0.98  | -1.41 | -0.79 | -0.21 | -0.42 | 0.76  | 1.40  | -0.54 | -0.97 | 1.19  |
| P50213 | Isocitrate dehydrogenase [NAD] subunit alpha, mitochondrial               | IDH3A     | 1.14 | 2.73 | -0.51 | -2.22 | 1.16  | -0.18 | -0.69 | 0.58  | 1.04  | 0.71  | 0.02  | 0.09  |
| Q9BUV0 | Arginine/serine-rich protein 1                                            | RSRP1     | 1.14 | 1.44 | 0.88  | -0.04 | -2.06 | -0.73 | 0.42  | 1.11  | 1.21  | -0.49 | -0.52 | 0.21  |
| P50135 | Histamine N-methyltransferase                                             | HNMT      | 1.14 | 2.45 | 0.79  | -1.03 | -0.17 | -0.58 | -1.20 | -0.05 | 0.76  | 2.15  | -0.54 | -0.14 |
| O95336 | 6-phosphogluconolactonase                                                 | PGLS      | 1.14 | 4.92 | -1.26 | -0.23 | -0.30 | -0.62 | -0.94 | -0.62 | 1.79  | 1.44  | 0.18  | 0.56  |
| Q9H074 | Polyadenylate-binding protein-interacting protein 1                       | PAIP1     | 1.14 | 1.25 | 1.41  | -0.78 | -1.02 | -0.12 | -0.86 | 0.89  | -0.80 | 1.28  | -0.87 | 0.87  |
| Q13188 | Serine/threonine-protein kinase 3                                         | STK3      | 1.14 | 2.23 | -0.26 | -0.52 | -0.55 | -0.47 | -0.40 | -0.36 | -0.37 | -0.78 | 2.18  | 1.53  |
| Q13547 | Histone deacetylase 1                                                     | HDAC1     | 1.14 | 2.11 | -0.29 | -0.34 | -0.61 | -0.42 | -0.46 | -0.38 | -0.37 | -0.86 | 1.61  | 2.11  |
| P28065 | Proteasome subunit beta type-9                                            | PSMB9     | 1.14 | 3.08 | 0.72  | -2.28 | -0.04 | -0.42 | -0.53 | 1.13  | 0.74  | 0.98  | -0.09 | -0.21 |

|        |                                                             |          |      |      |       |       |       |       |       |       |       |       |       |       |
|--------|-------------------------------------------------------------|----------|------|------|-------|-------|-------|-------|-------|-------|-------|-------|-------|-------|
| O14949 | Cytochrome b-c1 complex subunit 8                           | UQCRCQ   | 1.14 | 3.45 | -0.29 | -0.62 | -0.81 | -0.48 | -0.69 | -0.77 | 1.64  | 0.96  | -0.56 | 1.63  |
| O75828 | Carbonyl reductase [NADPH] 3                                | CBR3     | 1.14 | 2.04 | -0.20 | -0.35 | -1.29 | 0.44  | -0.58 | 1.07  | -1.59 | 0.38  | 0.51  | 1.60  |
| O00291 | Huntingtin-interacting protein 1                            | HIP1     | 1.14 | 3.44 | -1.26 | -0.55 | -0.81 | 0.50  | -0.59 | 1.28  | 0.27  | -1.00 | 0.44  | 1.72  |
| Q9C0E8 | Endoplasmic reticulum junction formation protein lunapark   | LNPK     | 1.14 | 4.70 | -1.79 | -0.49 | -0.34 | 0.42  | -0.92 | 1.29  | -0.15 | -0.24 | 1.41  | 0.83  |
| P16539 | Mitogen-activated protein kinase 14                         | MAPK14   | 1.13 | 1.69 | 0.81  | -0.68 | -1.25 | 0.51  | -1.09 | 0.41  | 1.35  | -1.36 | 0.33  | 0.97  |
| P22033 | Methylmalonyl-CoA mutase, mitochondrial                     | MMUT     | 1.13 | 2.08 | -1.47 | -1.86 | 1.02  | 0.00  | 0.31  | -0.46 | 0.35  | 0.70  | 1.17  | 0.24  |
| P06737 | Glycogen phosphorylase, liver form                          | PYGL     | 1.13 | 2.12 | -0.54 | -0.70 | -0.97 | 1.06  | -0.84 | 0.43  | 1.82  | -1.19 | 0.67  | 0.26  |
| Q8NAP3 | Zinc finger and BTB domain-containing protein 38            | ZBTB38   | 1.13 | 0.91 | 1.37  | -0.54 | -0.72 | -0.58 | -0.60 | 1.66  | 1.29  | -0.75 | -0.56 | -0.56 |
| O14745 | Na(+)/H(+) exchange regulatory cofactor NHE-RF1             | SLC9A3R1 | 1.13 | 1.78 | -0.15 | -0.55 | -0.78 | -1.65 | 1.35  | 0.20  | 0.10  | 1.84  | -0.29 | -0.08 |
| Q9H6T3 | RNA polymerase II-associated protein 3                      | RPAP3    | 1.13 | 1.68 | -0.74 | -1.05 | -1.13 | 0.95  | 0.28  | -0.82 | -0.80 | 0.86  | 1.06  | 1.39  |
| P51687 | Sulfite oxidase, mitochondrial                              | SUOX     | 1.13 | 1.78 | -0.30 | 0.13  | -0.66 | -0.54 | -0.48 | -0.55 | -0.43 | 2.54  | -0.55 | 0.84  |
| Q15326 | Zinc finger MYND domain-containing protein 11               | ZMYND11  | 1.13 | 1.60 | 0.90  | -1.70 | -1.34 | -0.16 | 0.65  | 0.61  | 1.60  | -0.08 | -0.22 | -0.26 |
| Q7LBR1 | Charged multivesicular body protein 1b                      | CHMP1B   | 1.13 | 2.60 | -0.01 | -2.64 | 0.37  | -0.01 | -0.08 | -0.06 | 0.31  | 0.86  | 0.27  | 0.99  |
| Q9ULB1 | Neurexin-1                                                  | NRXN1    | 1.12 | 1.44 | -0.21 | -0.48 | -0.54 | 0.12  | -0.48 | -0.44 | 2.75  | 0.19  | -0.52 | -0.39 |
| P27635 | 60S ribosomal protein L10                                   | RPL10    | 1.12 | 1.28 | 0.16  | -0.22 | 0.80  | -1.19 | -0.95 | 0.54  | 1.07  | -1.55 | -0.13 | 1.46  |
| Q5T5Y3 | Calmodulin-regulated spectrin-associated protein 1          | CAMSAP1  | 1.12 | 1.24 | 0.59  | 0.16  | -2.74 | 0.58  | 0.00  | 0.15  | 0.66  | -0.14 | 0.35  | 0.40  |
| P14384 | Carboxypeptidase M                                          | CPM      | 1.12 | 1.74 | 0.35  | -0.89 | -0.98 | 0.64  | -0.88 | -0.78 | -0.89 | 1.72  | 1.11  | 0.59  |
| Q12965 | Unconventional myosin-Ie                                    | MYO1E    | 1.12 | 1.70 | 0.52  | -0.24 | 0.15  | 0.35  | -2.52 | 0.82  | 0.49  | -0.74 | 0.45  | 0.71  |
| P11802 | Cyclin-dependent kinase 4                                   | CDK4     | 1.12 | 2.23 | 0.03  | -0.58 | -0.83 | -0.19 | -0.59 | 2.33  | 0.91  | -0.78 | -0.74 | 0.44  |
| Q8WVC6 | Dephospho-CoA kinase domain-containing protein              | DCAKD    | 1.12 | 3.04 | 0.73  | -1.12 | -1.83 | 0.36  | -0.65 | 0.86  | -0.29 | 1.54  | 0.34  | 0.05  |
| Q9HCC0 | Methylcrotonoyl-CoA carboxylase beta chain, mitochondrial   | MCCCC2   | 1.12 | 2.79 | -1.61 | 0.44  | -0.58 | -1.08 | 0.48  | 1.56  | -0.14 | 1.23  | -0.63 | 0.34  |
| Q15814 | Tubulin-specific chaperone C                                | TBCC     | 1.11 | 1.73 | 0.29  | -0.04 | -2.50 | 0.40  | 0.09  | 1.50  | 0.41  | -0.27 | 0.00  | 0.11  |
| Q6UX71 | Plexin domain-containing protein 2                          | PLXD2    | 1.11 | 2.43 | -0.31 | -0.47 | -0.64 | -0.28 | -0.63 | -0.49 | -0.55 | 1.60  | -0.38 | 2.13  |
| P16152 | Carbonyl reductase [NADPH] 1                                | CBR1     | 1.11 | 3.68 | -0.59 | -0.40 | 0.06  | 0.18  | -2.01 | 1.76  | -0.29 | -0.08 | 0.31  | 1.07  |
| P05155 | Plasma protease C1 inhibitor                                | SERPINC1 | 1.11 | 1.63 | -0.59 | -0.85 | -0.80 | 0.57  | -0.02 | -0.74 | -0.71 | 2.30  | 0.06  | 0.78  |
| P02763 | Alpha-1-acid glycoprotein 1                                 | ORM1     | 1.11 | 0.96 | 1.55  | -0.23 | -1.34 | -1.27 | 0.18  | 0.74  | 0.40  | 1.18  | -0.99 | -0.20 |
| Q13409 | Cytoplasmic dynein 1 intermediate chain 2                   | DYNC1I2  | 1.11 | 2.84 | -0.63 | -0.45 | -0.35 | 0.05  | -1.13 | 2.53  | -0.09 | -0.58 | 0.17  | 0.47  |
| Q9NR12 | PDZ and LIM domain protein 7                                | PDLIM7   | 1.11 | 1.30 | 0.90  | 0.85  | -1.13 | -0.96 | -1.06 | 0.73  | 0.26  | -1.25 | 0.28  | 1.38  |
| Q6UWP2 | Dehydrogenase/reductase SDR family member 11                | DHRS11   | 1.11 | 1.83 | -0.35 | -0.52 | 0.03  | -0.46 | -0.59 | 1.27  | -0.60 | 2.34  | -0.61 | -0.50 |
| Q92888 | Rho guanine nucleotide exchange factor 1                    | ARHGEP1  | 1.11 | 0.96 | 1.59  | -0.59 | -0.78 | -0.63 | -0.70 | 1.49  | 1.10  | -0.87 | -0.67 | 0.08  |
| P19652 | Alpha-1-acid glycoprotein 2                                 | ORM2     | 1.10 | 1.35 | -0.17 | -0.30 | -0.43 | -0.22 | -0.39 | -0.38 | -0.34 | 2.84  | -0.30 | -0.31 |
| P21589 | 5'-nucleotidase                                             | NTSE     | 1.10 | 2.08 | -1.18 | -0.34 | -0.09 | 1.06  | -1.40 | -1.28 | 0.56  | 0.80  | 1.04  | 0.84  |
| Q6NTE8 | MRN complex-interacting protein                             | MRNIP    | 1.10 | 2.72 | 0.52  | -0.20 | -0.78 | -0.27 | -1.61 | 1.25  | 1.48  | -0.98 | -0.23 | 0.81  |
| Q8IYJ1 | Copine-9                                                    | CPNE9    | 1.10 | 1.35 | -0.11 | -0.27 | -0.49 | -0.25 | -0.40 | -0.22 | 2.82  | -0.55 | -0.27 | -0.26 |
| Q9UK61 | Protein TASF1                                               | TASF1    | 1.10 | 0.94 | 1.23  | -1.03 | -1.16 | -0.81 | 0.68  | 0.94  | 1.31  | -1.15 | 0.05  | -0.06 |
| Q99623 | Prohibitin-2                                                | PHB2     | 1.10 | 1.19 | 1.37  | 0.62  | -0.79 | -1.13 | -1.39 | 0.39  | 1.16  | 0.70  | -0.96 | 0.03  |
| Q9UKV3 | Apoptotic chromatin condensation inducer in the nucleus     | ACIN1    | 1.10 | 2.42 | 1.28  | -0.97 | -1.27 | -0.74 | -0.46 | 1.81  | 0.65  | -0.44 | -0.17 | 0.31  |
| O14981 | TATA-binding protein-associated factor 172                  | BTAF1    | 1.10 | 1.29 | 1.38  | -1.43 | -1.13 | -0.27 | 0.05  | 0.82  | 1.09  | 0.85  | -0.37 | -0.99 |
| Q9NT15 | Sister chromatid cohesion protein PDS5 homolog B            | PDS5B    | 1.10 | 1.71 | 1.18  | -0.03 | -1.07 | 0.12  | -1.93 | 1.40  | -0.59 | -0.09 | 0.66  | 0.26  |
| Q15257 | Serine/threonine-protein phosphatase 2A activator           | PTPA     | 1.10 | 3.57 | -0.33 | 0.05  | -2.39 | 0.34  | -0.47 | 1.24  | 0.39  | -0.21 | 0.39  | 0.98  |
| Q9Y6M4 | Casein kinase I isoform gamma-3                             | CSNK1G3  | 1.10 | 2.44 | -1.18 | -0.10 | 0.47  | 0.61  | -1.99 | 0.35  | 1.27  | 0.34  | -0.65 | 0.88  |
| Q8N122 | Regulatory-associated protein of mTOR                       | RPTOR    | 1.10 | 0.65 | 0.98  | 0.01  | -2.51 | -0.21 | -0.10 | 1.16  | 1.43  | -1.53 | -0.11 | -0.14 |
| Q9UPT5 | Exocyst complex component 7                                 | EXOC7    | 1.10 | 1.57 | -0.02 | 0.77  | -2.51 | -0.26 | 0.37  | -0.59 | 0.81  | 0.78  | 0.13  | 0.51  |
| Q12768 | WASH complex subunit 5                                      | WASHC5   | 1.09 | 1.94 | -0.99 | -0.28 | 0.46  | 0.06  | -1.15 | 1.18  | 0.80  | -1.59 | 0.17  | 1.35  |
| P24928 | DNA-directed RNA polymerase II subunit RPB1                 | POLR2A   | 1.09 | 1.12 | 0.02  | 0.05  | -1.23 | 0.33  | -0.45 | 1.27  | 1.67  | -1.49 | 0.42  | -0.59 |
| Q8TD26 | Chromodomain-helicase-DNA-binding protein 6                 | CHD6     | 1.09 | 1.21 | 0.49  | -0.86 | -1.01 | -0.88 | 0.93  | 0.32  | 0.98  | 1.70  | -0.90 | -0.77 |
| P52298 | Nuclear cap-binding protein subunit 2                       | NCBP2    | 1.09 | 2.33 | 1.52  | -0.87 | -1.04 | -0.81 | -0.92 | 1.25  | 0.84  | 0.22  | -0.80 | 0.61  |
| P0COL5 | Complement C4-B                                             | C4B      | 1.09 | 0.90 | -1.18 | -1.27 | 1.12  | 0.48  | -0.21 | -0.42 | -1.07 | 1.66  | 0.43  | 0.45  |
| Q13363 | C-terminal-binding protein 1                                | CTBP1    | 1.09 | 0.98 | 0.55  | 0.59  | -2.77 | 0.29  | 0.16  | 0.42  | 0.53  | -0.15 | 0.29  | 0.08  |
| P12235 | ADP/ATP translocase 1                                       | SLC25A4  | 1.09 | 1.83 | -1.22 | -1.40 | 0.72  | -0.36 | 0.47  | -1.32 | 1.06  | 0.78  | 0.18  | 1.08  |
| P11413 | Glucose-6-phosphate 1-dehydrogenase                         | G6PD     | 1.08 | 4.59 | -0.61 | -0.30 | -0.18 | -0.88 | -1.26 | -0.09 | 0.53  | 0.24  | 0.16  | 2.40  |
| Q5SRE7 | Phytanoyl-CoA dioxygenase domain-containing protein 1       | PHYHD1   | 1.08 | 1.08 | 0.35  | -0.16 | -2.25 | 0.80  | 0.04  | 0.78  | -0.31 | -0.96 | 1.00  | 0.71  |
| Q01995 | Transgelin                                                  | TAGLN    | 1.08 | 1.62 | 0.10  | 0.07  | -1.22 | -0.34 | -0.31 | -1.59 | 0.48  | 1.33  | -0.17 | 1.65  |
| Q8NFP9 | Neurobeachin                                                | NBEA     | 1.08 | 0.58 | 0.87  | 0.05  | -1.54 | -0.15 | 0.03  | 1.58  | 1.25  | -0.75 | -0.26 | -1.08 |
| P02679 | Fibrinogen gamma chain                                      | FGG      | 1.08 | 4.97 | -0.73 | -0.90 | 0.45  | -1.13 | -0.93 | 0.77  | 0.87  | 1.19  | -0.90 | 1.31  |
| P14550 | Aldo-keto reductase family 1 member A1                      | AKR1A1   | 1.08 | 3.14 | -1.16 | -0.21 | 0.08  | -0.10 | -1.20 | 1.15  | -1.42 | 0.98  | 0.68  | 1.19  |
| P00325 | All-trans-retinol dehydrogenase [NAD(+)] ADH1B              | ADH1B    | 1.08 | 1.11 | 0.20  | -1.77 | 1.17  | 0.14  | -1.00 | -0.55 | -0.56 | 1.58  | 0.51  | 0.28  |
| P38919 | Eukaryotic initiation factor 4A-III                         | EIF4A3   | 1.08 | 3.00 | 0.25  | -0.49 | -0.58 | 0.38  | -2.02 | 0.20  | -0.78 | 0.84  | 0.68  | 1.53  |
| O43813 | Glutathione S-transferase LANCL1                            | LANCL1   | 1.08 | 5.64 | -0.37 | -1.06 | -0.63 | 0.39  | -1.73 | 0.65  | -0.36 | 1.55  | 0.68  | 0.88  |
| Q9Y247 | Protein FAM50B                                              | FAM50B   | 1.08 | 2.69 | 0.24  | -1.48 | 0.73  | -0.27 | -1.53 | -0.81 | 0.19  | 0.58  | 1.09  | 1.25  |
| O43809 | Cleavage and polyadenylation specificity factor subunit 5   | NUDT21   | 1.07 | 1.08 | 0.24  | -0.67 | -1.10 | 0.16  | 0.13  | -1.31 | 2.34  | 0.06  | 0.20  | -0.05 |
| Q9BZC7 | ATP-binding cassette sub-family A member 2                  | ABCA2    | 1.07 | 0.89 | 0.97  | -0.43 | -1.34 | 0.42  | -0.66 | 1.65  | 0.73  | -1.46 | 0.25  | -0.11 |
| Q12789 | General transcription factor 3C polypeptide 1               | GTFC3    | 1.07 | 0.89 | 1.27  | -0.81 | -0.97 | -0.36 | -0.18 | 1.54  | 1.25  | -1.00 | 0.10  | -0.84 |
| P11940 | Polyadenylate-binding protein 1                             | PABPC1   | 1.07 | 2.74 | 1.38  | -0.96 | -0.75 | -0.54 | -1.50 | 1.18  | 1.08  | 0.58  | -0.08 | -0.40 |
| O60934 | Nibrin                                                      | NBN      | 1.07 | 1.87 | -0.49 | -0.64 | -0.89 | 0.98  | -0.79 | -0.69 | 1.52  | -0.99 | 1.33  | 0.67  |
| Q96T58 | Mx2-interacting protein                                     | SPEN     | 1.07 | 1.81 | 0.70  | -1.96 | -0.50 | -0.20 | 0.17  | 0.15  | 2.06  | -0.04 | -0.14 | -0.25 |
| Q96PM5 | RING finger and CHY zinc finger domain-containing protein 1 | RCHY1    | 1.07 | 2.27 | 0.55  | -0.77 | -1.05 | 0.05  | -0.87 | 2.33  | 0.32  | -0.81 | 0.17  | 0.09  |
| Q96HC4 | PDZ and LIM domain protein 5                                | PDLIM5   | 1.07 | 1.56 | 1.47  | -0.95 | -0.92 | -0.37 | -0.83 | 1.36  | 1.31  | -0.77 | -0.34 | 0.04  |
| Q9BUP3 | Oxidoreductase HTATIP2                                      | HTATIP2  | 1.07 | 1.18 | -0.01 | 1.23  | 0.04  | -1.30 | -1.27 | 0.65  | -1.33 | 0.90  | -0.01 | 1.09  |
| P39060 | Collagen alpha-1(XVIII) chain                               | COL18A1  | 1.07 | 1.79 | 0.16  | -1.29 | 1.25  | -1.76 | -0.15 | -0.63 | 0.54  | 0.23  | 0.32  | 1.33  |
| Q9P2T1 | GMP reductase 2                                             | GMPT2    | 1.07 | 1.69 | -0.92 | -1.20 | 0.78  | 0.24  | -0.61 | 0.82  | -1.53 | 1.51  | 0.46  | 0.45  |
| Q8TER5 | Rho guanine nucleotide exchange factor 40                   | ARHGEP40 | 1.07 | 2.13 | -0.76 | 0.43  | -1.11 | -0.39 | -0.21 | -0.03 | -0.87 | 2.43  | 0.13  | 0.38  |
| O95861 | 3'(2'),5'-bisphosphate nucleotidase 1                       | BPNT1    | 1.07 | 2.70 | -0.60 | 0.11  | -0.04 | 0.56  | -2.39 | -0.14 | 0.62  | 1.34  | 0.61  | -0.06 |
| Q14558 | Phosphoribosyl pyrophosphate synthase-associated protein 1  | PRPSAP1  | 1.07 | 1.87 | 0.59  | -2.23 | 0.27  | 0.39  | -0.87 | 1.22  | 0.25  | 0.94  | -0.05 | -0.51 |
| Q9NXD2 | Myotubularin-related protein 10                             | MTMR10   | 1.06 | 1.66 | 0.20  | -1.01 | 0.07  | 0.28  | -1.24 | 1.35  | -1.70 | 0.91  | 0.33  | 0.82  |
| Q12802 | A-kinase anchor protein 13                                  | AKAP13   | 1.06 | 1.97 | 0.78  | 0.16  | -2.47 | 0.12  | -0.53 | 0.62  | 0.61  | -0.54 | 0.36  | 0.89  |
| O95628 | CCR4-NOT transcription complex subunit 4                    | CNOT4    | 1.06 | 1.23 | -0.12 | -0.24 | -0.45 | -0.24 | -0.36 | -0.23 | 2.82  | -0.61 | -0.33 | -0.23 |
| P04899 | Guanine nucleotide-binding protein G(i) subunit alpha-2     | GNAI2    | 1.06 | 3.36 | -1.44 | 0.08  | -0.10 | 0.59  | -1.79 | 1.52  | 0.28  | -0.41 | 0.73  | 0.54  |
| Q16890 | Tumor protein D53                                           | TPD52L1  | 1.06 | 1.39 | 0.18  | -0.78 | -1.85 | 0.50  | 0.47  | 0.74  | 0.40  | -1.34 | 0.32  | 1.36  |
| P57052 | Splicing regulator RBM11                                    | RBM11    | 1.06 | 0.98 | 0.45  | -0.79 | -0.93 | 1.02  | -0.88 | 0.45  | -0.86 | -1.07 | 1.23  | 1.38  |
| Q6SPF0 | Atherin                                                     | SAMD1    | 1.06 | 2.18 | -0.18 | -1.52 | -1.52 | 0.49  | 0.71  | -0.54 | -0.39 | 0.59  | 1.26  | 1.10  |
| P27797 | Calreticulin                                                | CALR     | 1.06 | 2.60 | -1.38 | -0.05 | 1.12  | -0.39 | -1.58 | 1.13  | 0.65  | -0.64 | 0.10  | 1.04  |
| P31948 | Stress-induced-phosphoprotein 1                             | STIP1    | 1.06 | 1.85 | -0.82 | -1.63 | -0.26 | 0.00  | 0.90  | -0.47 | 0.08  | 2.13  | -0.01 | 0.08  |

|        |                                                                  |             |      |      |       |       |       |       |       |       |       |       |       |       |
|--------|------------------------------------------------------------------|-------------|------|------|-------|-------|-------|-------|-------|-------|-------|-------|-------|-------|
| Q13228 | Methanethiol oxidase                                             | SELENBP1    | 1.06 | 1.94 | -1.89 | -0.52 | -0.13 | 0.03  | 0.65  | -0.95 | 0.22  | 1.86  | 0.23  | 0.52  |
| Q562E7 | WD repeat-containing protein 81                                  | WDR81       | 1.05 | 1.54 | 0.45  | 0.45  | -2.04 | 0.21  | -0.66 | 0.85  | 1.04  | -1.29 | 0.44  | 0.56  |
| Q9P2J5 | Leucine-tRNA ligase, cytoplasmic                                 | LARS        | 1.05 | 1.57 | 0.60  | -1.50 | -1.73 | 0.64  | 0.37  | 0.35  | 0.99  | -0.97 | 0.58  | 0.69  |
| Q9BU02 | Thiamine-triphosphatase                                          | THTPA       | 1.05 | 1.30 | -0.76 | 0.95  | -1.11 | 0.45  | -0.94 | -0.86 | -0.95 | 1.36  | 0.90  | 0.96  |
| P35244 | Replication protein A 14 kDa subunit                             | RPA3        | 1.05 | 2.00 | -0.05 | 0.30  | -0.36 | 0.28  | -2.07 | 1.12  | 1.30  | -1.09 | 0.05  | 0.53  |
| Q96T76 | MMS19 nucleotide excision repair protein homolog                 | MMS19       | 1.04 | 2.95 | 0.53  | -1.67 | -0.68 | -0.05 | -0.57 | -0.19 | 2.22  | 0.05  | -0.05 | 0.41  |
| P09110 | 3-ketoacyl-CoA thiolase, peroxisomal                             | ACAA1       | 1.04 | 1.44 | -0.83 | -0.90 | 0.51  | 0.64  | -0.95 | -0.95 | -0.96 | 1.43  | 1.13  | 0.87  |
| Q9H4A6 | Golgi phosphoprotein 3                                           | GOLPH3      | 1.04 | 1.32 | -0.42 | -0.54 | -0.77 | -0.62 | 0.92  | -0.61 | -0.49 | 0.79  | -0.53 | 2.28  |
| Q95870 | Phosphatidylserine lipase ABHD16A                                | ABHD16A     | 1.04 | 1.52 | -1.64 | 0.35  | -1.86 | 0.50  | 1.03  | 0.03  | 0.20  | -0.20 | 0.94  | 0.66  |
| P23515 | Oligodendrocyte-myelin glycoprotein                              | OMG         | 1.04 | 1.60 | -0.75 | -1.19 | -0.29 | 0.17  | 0.39  | -0.53 | 0.75  | 2.23  | 0.19  | -0.96 |
| Q9UHB9 | Signal recognition particle subunit SRP68                        | SRP68       | 1.04 | 1.61 | 0.80  | -0.99 | 0.22  | 0.00  | -1.67 | 1.08  | 1.09  | -1.16 | -0.25 | 0.88  |
| Q6PML9 | Zinc transporter 9                                               | SLC30A9     | 1.04 | 1.78 | -1.29 | -0.67 | 1.16  | -0.82 | -0.14 | -1.17 | 1.56  | 0.87  | -0.02 | 0.52  |
| P51570 | Galactokinase                                                    | GALK1       | 1.03 | 2.56 | -0.21 | -0.02 | -1.24 | 0.04  | -0.89 | 1.93  | 0.59  | -1.33 | 0.25  | 0.87  |
| P48506 | Glutamate-cysteine ligase catalytic subunit                      | GCLC        | 1.03 | 2.14 | -0.53 | 0.31  | -0.05 | 0.06  | -1.78 | 0.55  | 1.97  | -1.04 | 0.15  | 0.37  |
| Q9P2D3 | HEAT repeat-containing protein 5B                                | HEATR5B     | 1.03 | 1.08 | 1.21  | 0.18  | -1.16 | -0.38 | -1.07 | 1.21  | 1.18  | -1.39 | -0.06 | 0.27  |
| P09874 | Poly [ADP-ribose] polymerase 1                                   | PARP1       | 1.03 | 5.47 | -1.10 | -1.28 | -0.43 | 0.38  | -0.94 | 0.63  | 1.83  | 0.51  | 0.87  | -0.46 |
| P28482 | Mitogen-activated protein kinase 1                               | MAPK1       | 1.03 | 8.72 | -1.15 | -0.35 | -0.70 | -0.34 | -1.46 | 0.73  | 1.21  | 1.59  | -0.04 | 0.53  |
| Q9NZJ7 | Mitochondrial carrier homolog 1                                  | MTCH1       | 1.03 | 1.86 | 0.57  | -0.98 | 0.79  | -0.37 | -1.84 | 1.31  | 0.52  | -0.94 | 0.09  | 0.85  |
| Q15181 | Inorganic pyrophosphatase                                        | PPA1        | 1.03 | 4.16 | -1.27 | -1.20 | 0.51  | -0.24 | -0.75 | 1.65  | 0.52  | 1.24  | 0.23  | -0.69 |
| P61956 | Small ubiquitin-related modifier 2                               | SUMO2       | 1.03 | 2.41 | -2.25 | -0.23 | -0.53 | 0.25  | 0.59  | -0.04 | -0.43 | 1.54  | 0.63  | 0.46  |
| O15056 | Synaptotagmin-2                                                  | SYNJ2       | 1.03 | 1.20 | 1.30  | -1.04 | -1.09 | 0.54  | -1.04 | 1.32  | 0.76  | -0.41 | 0.58  | -0.92 |
| P42785 | Lysosomal Pro-X carboxypeptidase                                 | PRCP        | 1.03 | 1.27 | -0.73 | -0.65 | -0.38 | -0.48 | 0.83  | -0.63 | -0.65 | 2.28  | -0.47 | 0.87  |
| Q96PV6 | Leukocyte receptor cluster member 8                              | LENG8       | 1.02 | 1.07 | -0.85 | -1.05 | -1.21 | 0.63  | 1.26  | -0.31 | -1.06 | 1.29  | 0.66  | 0.63  |
| P45973 | Chromobox protein homolog 5                                      | CBX5        | 1.02 | 2.17 | 0.19  | -1.56 | -1.38 | 0.18  | 0.56  | 1.94  | -0.12 | -0.50 | 0.23  | 0.47  |
| Q9Y2D5 | A-kinase anchor protein 2                                        | AKAP2       | 1.02 | 0.68 | 1.04  | -0.62 | -0.89 | 0.02  | -0.41 | 1.75  | 1.31  | -0.99 | -0.79 | -0.44 |
| P19174 | 1-phosphatidylinositol 4,5-bisphosphate phosphodiesterase gamma  | PLCG1       | 1.02 | 3.56 | -0.14 | -0.70 | -0.98 | -1.19 | 0.23  | 0.79  | 1.97  | 1.00  | -0.69 | -0.29 |
| Q96BR1 | Serine/threonine-protein kinase Sgk3                             | SGK3        | 1.02 | 1.44 | 1.00  | -0.87 | -1.08 | 0.50  | -1.05 | 1.28  | 0.04  | -1.21 | 0.14  | 1.27  |
| O94952 | F-box only protein 21                                            | FBXO21      | 1.02 | 1.38 | -0.45 | -0.64 | -0.79 | -0.62 | 1.02  | -0.57 | -0.60 | 1.64  | -0.60 | 1.61  |
| Q2TAY7 | WD40 repeat-containing protein SMU1                              | SMU1        | 1.02 | 2.00 | 0.60  | -2.11 | -1.11 | 0.29  | 0.39  | 0.83  | 0.62  | 0.04  | 1.10  | -0.65 |
| P18887 | DNA repair protein XRCC1                                         | XRCC1       | 1.02 | 1.37 | 1.03  | -1.09 | -2.38 | 0.25  | 0.65  | 0.34  | 0.43  | 0.51  | 0.19  | 0.07  |
| Q8IX03 | Protein KIBRA                                                    | WWC1        | 1.02 | 1.75 | -0.55 | -0.66 | -0.92 | 1.07  | -0.69 | 1.67  | -0.63 | -1.02 | 1.03  | 0.71  |
| O95373 | Importin-7                                                       | IPO7        | 1.02 | 2.05 | 1.46  | -0.29 | -1.92 | -0.17 | -1.09 | 1.17  | -0.09 | 0.03  | 0.22  | 0.67  |
| Q9NYS7 | WD repeat and SOCS box-containing protein 2                      | WSB2        | 1.02 | 1.28 | 1.08  | -0.59 | -0.70 | -0.59 | -0.60 | -0.54 | 1.07  | 2.04  | -0.64 | -0.52 |
| P61129 | Zinc finger CCHC domain-containing protein 6                     | ZC3H6       | 1.02 | 1.02 | 0.50  | -0.54 | -0.74 | -0.47 | 0.05  | 0.55  | 2.49  | -0.76 | -0.54 | -0.54 |
| Q9CGD6 | CNK3/IPCEF1 fusion protein                                       | CNK3/IPCEF1 | 1.01 | 1.50 | 1.44  | -1.28 | -0.52 | 0.05  | -1.25 | 0.75  | -1.20 | 0.50  | 0.64  | 0.88  |
| Q01629 | Interferon-induced transmembrane protein 2                       | IFITM2      | 1.01 | 1.31 | -1.32 | -0.04 | 0.68  | 0.68  | -1.41 | -1.41 | 0.64  | 1.12  | 0.79  | 0.27  |
| O14727 | Apoptotic protease-activating factor 1                           | APAF1       | 1.01 | 0.76 | 1.31  | -0.42 | -0.45 | -0.86 | -0.50 | 1.53  | 1.46  | -0.56 | -0.81 | -0.69 |
| Q9H269 | Vacuolar protein sorting-associated protein 16 homolog           | VPS16       | 1.01 | 2.98 | 0.47  | 0.00  | -0.68 | -0.85 | -1.41 | 1.09  | 0.81  | 1.74  | -0.64 | -0.53 |
| P08238 | Heat shock protein HSP 90-beta                                   | HSP90AB1    | 1.01 | 4.13 | -0.79 | 0.31  | -0.71 | -0.49 | -1.32 | 1.00  | 1.10  | -0.75 | -0.09 | 1.74  |
| O15347 | High mobility group protein B3                                   | HMGB3       | 1.01 | 1.13 | 0.61  | -0.14 | 0.74  | 0.18  | -2.70 | 0.57  | 0.01  | -0.17 | 0.48  | 0.43  |
| P17302 | Gap junction alpha-1 protein                                     | GJA1        | 1.01 | 2.24 | -0.08 | -1.20 | -1.73 | -0.16 | 1.10  | 1.08  | -0.23 | -0.16 | -0.05 | 1.43  |
| Q15149 | Plectin                                                          | PLEC        | 1.01 | 2.79 | 0.53  | -0.21 | -1.11 | -0.20 | -1.38 | 2.19  | -0.46 | 0.55  | -0.26 | 0.36  |
| P27694 | Replication protein A 70 kDa DNA-binding subunit                 | RPA1        | 1.01 | 3.97 | 0.76  | -1.23 | -1.69 | -0.14 | -0.59 | 1.72  | 0.40  | -0.11 | 0.15  | 0.73  |
| P50479 | PDZ and LIM domain protein 4                                     | PDLIM4      | 1.01 | 2.68 | 0.40  | 0.58  | -1.47 | 0.02  | -1.86 | 1.39  | 0.62  | 0.06  | -0.37 | 0.65  |
| P36871 | Phosphoglucomutase-1                                             | PGM1        | 1.00 | 1.61 | 1.13  | -1.32 | -0.31 | -0.65 | -0.50 | 1.51  | 1.40  | 0.12  | -0.67 | -0.72 |
| P34896 | Serine hydroxymethyltransferase, cytosolic                       | SHMT1       | 1.00 | 2.56 | 0.24  | -1.00 | -0.21 | -0.69 | -0.67 | 1.17  | 2.24  | -0.54 | -0.52 | -0.03 |
| O14773 | Tripeptidyl-peptidase 1                                          | TPP1        | 1.00 | 2.84 | -0.20 | -1.74 | -1.18 | -0.35 | 1.07  | -0.30 | 0.57  | 1.61  | 0.00  | 0.53  |
| P78508 | ATP-sensitive inward rectifier potassium channel 10              | KCNJ10      | 1.00 | 0.94 | 0.94  | -0.39 | 0.73  | -0.36 | -2.01 | 0.74  | 1.19  | -1.00 | -0.28 | 0.46  |
| Q03135 | Caveolin-1                                                       | CAV1        | 1.00 | 1.78 | -0.32 | -1.00 | 1.10  | 0.29  | -1.83 | 0.26  | 1.47  | 0.32  | -0.80 | 0.52  |
| P55087 | Aquaporin-4                                                      | AQP4        | 1.00 | 2.90 | 0.05  | -1.03 | -0.06 | 0.48  | -1.86 | 1.55  | -0.47 | 1.28  | 0.06  | 0.00  |
| Q9HCM4 | Band 4.1-like protein 5                                          | EPB41L5     | 1.00 | 1.52 | 0.36  | -0.82 | -1.62 | 0.84  | -0.33 | 1.29  | 0.03  | -1.33 | 0.96  | 0.62  |
| Q9GZT8 | NIF3-like protein 1                                              | NIF3L1      | 1.00 | 2.11 | 1.03  | -0.80 | -1.03 | 0.74  | -1.99 | 0.73  | 0.69  | 0.82  | 0.02  | -0.21 |
| Q6DKJ4 | Nucleoredoxin                                                    | NXN         | 1.00 | 2.02 | -0.22 | -0.43 | -0.64 | -0.29 | -0.47 | -0.24 | -0.41 | -0.86 | 1.15  | 2.40  |
| Q13907 | Isopentenyl-diphosphate Delta-isomerase 1                        | ID1I        | 1.00 | 1.85 | 0.64  | -1.97 | -0.65 | 1.19  | -1.08 | 0.78  | -0.21 | 0.24  | 0.99  | 0.06  |
| Q9H5N1 | Rab GTPase-binding effector protein 2                            | RABEP2      | 0.99 | 0.87 | 1.21  | -0.33 | -0.69 | -0.58 | -0.64 | 0.92  | 2.02  | -0.85 | -0.59 | -0.46 |
| P09488 | Glutathione S-transferase Mu 1                                   | GSTM1       | 0.99 | 2.77 | -1.04 | 0.65  | -1.75 | 0.37  | -0.58 | 1.43  | -0.58 | -0.18 | 0.57  | 1.10  |
| Q9Y4P1 | Cysteine protease ATG4B                                          | ATG4B       | 0.99 | 1.73 | 0.81  | 0.56  | -1.10 | -0.14 | -1.87 | 1.36  | 0.47  | -0.90 | 0.15  | 0.65  |
| O94903 | Pyridoxal phosphate homeostasis protein                          | PLPBP       | 0.99 | 3.40 | -0.34 | 0.44  | -1.45 | -0.60 | -0.73 | 0.50  | -0.18 | 2.32  | 0.11  | -0.07 |
| Q15349 | Ribosomal protein S6 kinase alpha-2                              | RPS6KA2     | 0.99 | 3.94 | 0.30  | -1.13 | -1.15 | -0.45 | -0.50 | 0.64  | 0.61  | 2.20  | -0.48 | -0.04 |
| O43747 | AP-1 complex subunit gamma-1                                     | APIG1       | 0.99 | 1.66 | -0.02 | -0.17 | -0.35 | -0.25 | -0.97 | 0.37  | 2.56  | -1.03 | -0.29 | 0.15  |
| P62136 | Serine/threonine-protein phosphatase PP1-alpha catalytic subunit | PPP1CA      | 0.99 | 3.14 | 0.07  | -1.01 | -2.22 | 0.84  | -0.32 | 0.54  | 1.02  | -0.18 | 0.81  | 0.46  |
| Q9Y530 | ADP-ribose glycohydrolase OARD1                                  | OARD1       | 0.99 | 1.68 | 0.35  | -0.74 | -1.01 | 0.39  | -0.72 | -0.74 | 1.37  | -1.23 | 1.03  | 1.30  |
| P41226 | Ubiquitin-like modifier-activating enzyme 7                      | UBA7        | 0.99 | 1.01 | -0.36 | -0.39 | -0.36 | -0.04 | -0.06 | -1.03 | -0.45 | -0.91 | 1.83  | 1.78  |
| P23526 | Adenosylhomocysteinase                                           | AHCY        | 0.99 | 1.87 | -0.32 | -0.95 | 0.54  | -0.60 | -0.54 | 0.50  | -0.64 | 2.48  | 0.06  | -0.52 |
| Q9GZP4 | PITH domain-containing protein 1                                 | PITHD1      | 0.99 | 1.75 | 1.13  | 0.25  | -1.15 | -0.77 | -1.20 | -0.39 | -0.26 | 1.93  | -0.12 | 0.59  |
| P55345 | Protein arginine N-methyltransferase 2                           | PRMT2       | 0.99 | 2.49 | 0.01  | 0.06  | 0.71  | -0.69 | -2.34 | 0.56  | -0.58 | 0.47  | 0.74  | 1.06  |
| P54136 | Arginine-tRNA ligase, cytoplasmic                                | RARS        | 0.98 | 2.19 | -1.64 | -0.59 | 1.20  | -0.13 | -0.87 | -0.53 | -0.16 | 1.22  | 0.10  | 1.39  |
| P35555 | Fibrillin-1                                                      | FBN1        | 0.98 | 0.72 | 0.66  | -1.19 | -0.56 | -0.63 | 0.85  | 1.89  | 0.81  | -0.84 | -0.86 | -0.12 |
| P00747 | Plasminogen                                                      | PLG         | 0.98 | 1.42 | 0.36  | 0.14  | -0.07 | 0.09  | -2.01 | 1.47  | -1.22 | 0.06  | 0.13  | 1.06  |
| P46976 | Glycogenin-1                                                     | GYG1        | 0.98 | 1.05 | -0.48 | -1.78 | -0.78 | 1.01  | 0.84  | -0.11 | 0.48  | 0.27  | 1.46  | -0.91 |
| Q92736 | Ryanodine receptor 2                                             | RYR2        | 0.98 | 1.51 | 1.26  | -1.25 | -0.18 | 0.26  | -1.67 | 0.98  | 1.06  | -0.85 | -0.02 | 0.42  |
| P16930 | Fumarylacetoacetase                                              | FAH         | 0.98 | 1.17 | 0.29  | -0.63 | -1.16 | 0.60  | -0.43 | -1.00 | -0.66 | 2.21  | 0.33  | 0.43  |
| P50395 | Rab GDP dissociation inhibitor beta                              | GDI2        | 0.98 | 3.13 | -0.29 | -0.78 | 0.42  | -0.17 | -1.71 | 1.57  | 0.72  | 1.14  | 0.03  | -0.94 |
| P23396 | 40S ribosomal protein S3                                         | RPS3        | 0.98 | 5.18 | 0.21  | -1.18 | -0.80 | 0.16  | -1.66 | 1.50  | 1.23  | -0.15 | 0.11  | 0.57  |
| P04080 | Cystatin-B                                                       | CSTB        | 0.98 | 3.93 | -0.88 | -0.65 | -0.39 | 0.32  | -1.32 | 0.80  | -1.05 | 1.74  | 0.80  | 0.64  |
| P38571 | Lysosomal acid lipase/cholesteryl ester hydrolase                | LIPA        | 0.98 | 1.40 | 0.44  | -1.50 | -1.79 | 0.40  | 0.95  | 0.04  | 0.40  | 1.08  | 0.69  | -0.71 |
| P0D182 | Trafficking protein particle complex subunit 2B                  | TRAPPC2B    | 0.98 | 1.54 | -0.59 | -0.60 | -0.91 | 1.15  | -0.63 | -0.71 | -1.05 | 1.30  | 1.43  | 1.43  |
| Q9H1K0 | Rabenosyn-5                                                      | RBSN        | 0.98 | 1.37 | 1.27  | -0.77 | -1.97 | 0.06  | -0.06 | 0.77  | 1.25  | 0.40  | -0.20 | -0.75 |
| Q99598 | Translin-associated protein X                                    | TSNAX       | 0.98 | 1.81 | -0.58 | 0.70  | -1.07 | 0.12  | -0.96 | -0.70 | -0.91 | 1.82  | 1.14  | 0.45  |
| Q9H9A6 | Leucine-rich repeat-containing protein 40                        | LRRC40      | 0.97 | 0.74 | 1.44  | 0.39  | -1.69 | -0.12 | -0.93 | 1.30  | 0.19  | -1.09 | 0.18  | 0.32  |
| Q8N8L2 | Zinc finger protein 491                                          | ZNF491      | 0.97 | 1.22 | 0.58  | -1.32 | -1.44 | 0.19  | 0.65  | 0.43  | 1.51  | 0.36  | 0.35  | -1.30 |
| P16885 | 1-phosphatidylinositol 4,5-bisphosphate phosphodiesterase gamma  | PLCG2       | 0.97 | 1.92 | -2.29 | 1.17  | 0.35  | -0.76 | -0.40 | 0.06  | 1.13  | 0.14  | 0.17  | 0.44  |
| Q8N6N7 | Acyl-CoA-binding domain-containing protein 7                     | ACBD7       | 0.97 | 1.41 | -1.04 | -0.50 | -1.05 | -1.07 | 2.11  | -0.18 | 0.35  | 0.40  | 0.22  | 0.76  |

|        |                                                                   |           |      |      |       |       |       |       |       |       |       |       |       |       |
|--------|-------------------------------------------------------------------|-----------|------|------|-------|-------|-------|-------|-------|-------|-------|-------|-------|-------|
| P49821 | NADH dehydrogenase [ubiquinone] flavoprotein 1, mitochondrial     | NDUFV1    | 0.97 | 1.01 | -0.67 | -0.28 | 1.39  | -0.79 | -0.81 | 1.32  | -0.72 | -1.11 | 0.40  | 1.27  |
| P17066 | Heat shock 70 kDa protein 6                                       | HSPA6     | 0.96 | 1.38 | -0.31 | 0.65  | -0.74 | -0.47 | -0.64 | -0.52 | -0.45 | -0.95 | 1.92  | 1.51  |
| Q9ULP9 | TBC1 domain family member 24                                      | TBC1D24   | 0.96 | 1.97 | -0.30 | 0.28  | -1.60 | 0.03  | -0.32 | -1.14 | -0.16 | 1.52  | 0.11  | 1.59  |
| Q9Y478 | 5'-AMP-activated protein kinase subunit beta-1                    | PRKAB1    | 0.96 | 1.17 | 0.73  | -0.08 | -2.05 | 0.26  | -0.16 | 1.33  | 1.25  | -0.50 | -0.01 | -0.77 |
| Q9Y5B8 | Nucleoside diphosphate kinase 7                                   | NME7      | 0.96 | 2.28 | 0.04  | -1.72 | -1.11 | 0.04  | 0.66  | 0.81  | 1.58  | -0.78 | -0.26 | 0.72  |
| Q9BR76 | Coronin-1B                                                        | CORO1B    | 0.96 | 4.06 | -0.86 | -1.22 | -0.48 | -0.92 | 0.54  | 0.60  | 1.92  | 1.04  | -0.54 | -0.08 |
| Q9UK41 | Vacuolar protein sorting-associated protein 28 homolog            | VPS28     | 0.96 | 1.70 | 0.84  | 0.26  | -2.56 | 0.43  | -0.76 | 0.67  | 0.07  | 0.14  | 0.59  | 0.32  |
| P52306 | Rap1 GTPase-GDP dissociation stimulator 1                         | RAP1GDS1  | 0.96 | 2.34 | -1.75 | 1.18  | -0.29 | -0.61 | -0.64 | 0.85  | 1.51  | -0.51 | -0.31 | 0.58  |
| P78386 | Keratin, type II cuticular Hb5                                    | KRT85     | 0.96 | 0.71 | 0.82  | 1.21  | -1.10 | -0.83 | -0.98 | 0.70  | 0.62  | 1.28  | -0.92 | -0.81 |
| Q9NRZ7 | 1-acyl-sn-glycerol-3-phosphate acyltransferase gamma              | AGPAT3    | 0.96 | 2.94 | -0.61 | -0.80 | 0.67  | 0.06  | -1.75 | -0.42 | 0.84  | -0.18 | 0.33  | 1.86  |
| P10599 | Thioredoxin                                                       | TXN       | 0.96 | 0.88 | -0.16 | 0.37  | 0.15  | -1.23 | -0.19 | 0.13  | 0.25  | 2.36  | -0.52 | -1.16 |
| P04196 | Histidine-rich glycoprotein                                       | HRG       | 0.96 | 1.41 | 1.06  | -0.65 | -0.69 | -0.58 | -0.65 | -0.49 | -0.61 | 1.58  | -0.63 | 1.65  |
| P23469 | Receptor-type tyrosine-protein phosphatase epsilon                | PTPRE     | 0.96 | 1.30 | 0.13  | -0.15 | 1.39  | -1.16 | -1.62 | 0.54  | 1.58  | -0.32 | -0.38 | -0.01 |
| Q6P6C2 | RNA demethylase ALKBH5                                            | ALKBH5    | 0.95 | 1.46 | 1.17  | -0.80 | -1.04 | -0.78 | -0.09 | -0.91 | -0.86 | 0.86  | 1.25  | 1.19  |
| Q5HY17 | Metaxin-3                                                         | MTX3      | 0.95 | 1.36 | 0.77  | 1.07  | -0.14 | -1.56 | -1.60 | 0.86  | 1.16  | -0.08 | -0.37 | -0.10 |
| Q96LD4 | E3 ubiquitin-protein ligase TRIM47                                | TRIM47    | 0.95 | 1.35 | 0.76  | -0.43 | 0.30  | -0.73 | -1.37 | 1.53  | -1.41 | 0.40  | -0.18 | 1.10  |
| Q8N3F0 | Maturin                                                           | MTURN     | 0.95 | 1.59 | 0.16  | 0.83  | -0.70 | 0.56  | -2.55 | 0.14  | -0.10 | 0.61  | 0.46  | 0.60  |
| Q13402 | Unconventional myosin-VIIa                                        | MYO7A     | 0.95 | 0.82 | 1.43  | -0.89 | -0.09 | -0.89 | -0.54 | 1.36  | 0.85  | -1.11 | -0.84 | 0.72  |
| P28838 | Cytosol aminopeptidase                                            | LAP3      | 0.95 | 3.73 | -0.47 | -0.12 | -0.62 | -1.20 | -0.53 | 1.42  | -0.30 | 1.97  | -0.65 | 0.51  |
| Q9BZ30 | Crooked neck-like protein 1                                       | CRNKL1    | 0.95 | 1.31 | 1.36  | -0.43 | -2.07 | -0.33 | 0.04  | 1.29  | 0.73  | -0.59 | 0.10  | -0.10 |
| P46100 | Transcriptional regulator ATRX                                    | ATRX      | 0.95 | 0.71 | 1.17  | -0.96 | -1.57 | 0.05  | 0.43  | 1.07  | 1.28  | -0.98 | 0.08  | -0.57 |
| Q9BXW6 | Oxysterol-binding protein-related protein 1                       | OSBPL1A   | 0.95 | 3.41 | -0.45 | -0.82 | -0.11 | 0.77  | -2.07 | 0.34  | 0.29  | -0.22 | 0.70  | 1.58  |
| O15355 | Protein phosphatase 1G                                            | PPM1G     | 0.95 | 2.91 | 0.83  | -1.38 | -0.89 | -0.33 | -0.65 | 1.59  | 0.24  | -0.44 | -0.42 | 1.46  |
| P07738 | Bisphosphoglycerate mutase                                        | BPGM      | 0.95 | 1.00 | -0.90 | 0.09  | -1.73 | 0.53  | 0.86  | -1.51 | 0.46  | 0.89  | 0.76  | 0.54  |
| P16402 | Histone H1.3                                                      | HIST1H1D  | 0.95 | 2.09 | 0.22  | -1.39 | 0.87  | 0.19  | -1.88 | 1.13  | -0.32 | 0.30  | -0.20 | 1.09  |
| P61457 | Pterin-4-alpha-carbinolamine dehydratase                          | PCBD1     | 0.95 | 1.32 | -0.10 | -0.35 | -0.44 | -0.22 | -0.39 | -0.29 | -0.38 | 2.83  | -0.30 | -0.37 |
| O60483 | G-protein coupled receptor 37-like 1                              | GPR37L1   | 0.94 | 1.85 | -1.15 | -0.15 | -0.63 | 1.16  | -1.03 | -0.20 | -0.93 | 1.43  | 1.38  | 0.14  |
| Q09161 | Nuclear cap-binding protein subunit 1                             | NCBP1     | 0.94 | 1.36 | -0.41 | -0.49 | -0.70 | 0.64  | -0.53 | -0.53 | -0.51 | -0.91 | 1.49  | 1.96  |
| Q8NI27 | THO complex subunit 2                                             | THOC2     | 0.94 | 2.62 | -1.09 | -1.06 | 0.63  | -1.28 | 0.53  | 1.10  | -0.17 | 1.54  | -0.70 | 0.50  |
| P20338 | Ras-related protein Rab-4A                                        | RAB4A     | 0.94 | 3.47 | -0.02 | -1.25 | -1.62 | 0.95  | -0.78 | 0.96  | 1.36  | 0.03  | 0.67  | -0.32 |
| P16401 | Histone H1.5                                                      | HIST1H1B  | 0.94 | 4.40 | -0.64 | -0.83 | 0.74  | -0.69 | -1.60 | 0.62  | 0.48  | 0.31  | -0.26 | 1.88  |
| O95831 | Apoptosis-inducing factor 1, mitochondrial                        | AIFM1     | 0.94 | 2.04 | -0.27 | -0.12 | -0.69 | -0.61 | -0.35 | -0.47 | -0.41 | 1.45  | -0.74 | 2.21  |
| P13451 | Peptidyl-prolyl cis-trans isomerase FKBP5                         | FKBP5     | 0.94 | 3.00 | -1.97 | -0.53 | 0.27  | 0.17  | -0.41 | 0.75  | -0.96 | 1.59  | 0.45  | 0.63  |
| P49789 | Bis(5'-adenosyl)-triphosphatase                                   | FHIT      | 0.94 | 0.96 | 1.74  | -1.33 | -0.51 | -0.61 | -0.41 | 1.10  | 1.11  | 0.24  | -0.56 | -0.77 |
| P34913 | Bifunctional epoxide hydrolase 2                                  | EPHX2     | 0.94 | 1.67 | -0.25 | 0.25  | -0.69 | -0.47 | -0.61 | -0.46 | -0.54 | 2.53  | 0.78  | -0.56 |
| Q8N3E9 | 1-phosphatidylinositol 4,5-bisphosphate phosphodiesterase delta-3 | PLCD3     | 0.94 | 2.25 | 0.56  | -1.49 | -1.25 | 0.65  | -0.54 | 1.60  | -0.33 | -0.63 | 0.97  | 0.43  |
| P10768 | S-formylglutathione hydrolase                                     | ESD       | 0.94 | 1.59 | -1.43 | -0.38 | 0.18  | -0.01 | -0.02 | 0.28  | -1.23 | 2.25  | 0.04  | 0.31  |
| P12931 | Proto-oncogene tyrosine-protein kinase Src                        | SRC       | 0.93 | 2.05 | -1.56 | -0.01 | -0.94 | 0.51  | 0.06  | -0.39 | 1.03  | -0.97 | 0.54  | 1.73  |
| P01861 | Immunoglobulin heavy constant gamma 4                             | IGHG4     | 0.93 | 1.23 | 0.78  | -0.79 | 0.06  | -0.70 | -0.71 | 1.79  | -0.01 | -0.98 | -0.82 | 1.39  |
| P98082 | Disabled homolog 2                                                | DAB2      | 0.93 | 0.98 | -0.74 | 0.96  | 0.23  | -0.68 | -0.91 | 0.40  | 0.96  | -1.13 | -0.85 | 1.77  |
| Q66K14 | TBC1 domain family member 9B                                      | TBC1D9B   | 0.93 | 1.81 | 1.14  | -0.61 | -1.98 | 0.15  | -0.48 | 1.00  | 1.41  | -0.37 | -0.04 | -0.20 |
| P00738 | Haptoglobin                                                       | HP        | 0.93 | 1.41 | -1.34 | 0.11  | 1.10  | 0.08  | -1.45 | 0.35  | -1.02 | 1.54  | 0.05  | 0.57  |
| Q00587 | Cdc42 effector protein 1                                          | CDC42EP1  | 0.93 | 0.81 | -0.34 | -1.16 | 0.40  | 1.29  | -1.16 | 0.24  | -1.12 | 0.13  | -0.03 | 1.74  |
| Q9Y5Y2 | Cytosolic Fe-S cluster assembly factor NUBP2                      | NUBP2     | 0.93 | 1.71 | 1.46  | -0.38 | -1.47 | -0.26 | -1.06 | 1.43  | -0.07 | -0.61 | -0.01 | 0.97  |
| Q09028 | Histone-binding protein RBBP4                                     | RBBP4     | 0.93 | 2.21 | -0.38 | -0.53 | -1.64 | 1.07  | -0.56 | 0.54  | -1.16 | 0.97  | 0.88  | 1.30  |
| P60002 | Transcription elongation factor 1 homolog                         | ELOF1     | 0.93 | 1.42 | 0.82  | -0.87 | -1.13 | 0.57  | -0.89 | 0.92  | -0.86 | 1.44  | -0.86 | 0.87  |
| P31749 | RAC-alpha serine/threonine-protein kinase                         | AKT1      | 0.93 | 1.03 | 1.23  | -1.43 | -0.47 | 0.14  | -0.65 | 1.57  | 0.90  | -0.33 | 0.20  | -1.16 |
| Q9H3F6 | BTB/POZ domain-containing adaptor for CUL3-mediated RhoA de       | CTD1D10   | 0.93 | 1.48 | 1.44  | -0.16 | -1.49 | -0.43 | -0.91 | 0.71  | 0.64  | 0.53  | -1.27 | 0.93  |
| P15554 | Telomeric repeat-binding factor 2                                 | TERF2     | 0.93 | 2.06 | -0.56 | -0.64 | -0.91 | 0.90  | -0.75 | -0.81 | -0.74 | 0.58  | 1.82  | 1.11  |
| P30086 | Phosphatidylethanolamine-binding protein 1                        | PEBP1     | 0.93 | 1.53 | -0.37 | -0.28 | 0.06  | -0.74 | -0.32 | -0.12 | -0.45 | 2.78  | -0.37 | -0.19 |
| Q7L576 | Cytoplasmic FMRI-interacting protein 1                            | CYFI1P1   | 0.93 | 2.68 | 0.55  | -1.79 | -0.24 | 0.77  | -1.70 | 0.90  | 0.11  | 0.02  | 0.99  | 0.39  |
| P54687 | Branched-chain-amino-acid aminotransferase, cytosolic             | BCAT1     | 0.93 | 1.62 | -0.12 | -0.30 | -0.53 | -0.30 | -0.50 | -0.31 | -0.27 | 2.83  | -0.25 | -0.25 |
| P08134 | Rho-related GTP-binding protein RhoC                              | RHO       | 0.92 | 3.11 | -0.86 | 0.69  | -0.41 | -0.33 | -1.60 | 1.88  | -0.52 | -0.15 | 0.28  | 1.01  |
| P39748 | Flap endonuclease 1                                               | FEN1      | 0.92 | 1.66 | 1.31  | -2.16 | 0.04  | 0.12  | -1.05 | 0.33  | 0.83  | -0.25 | 0.82  | 0.01  |
| P00966 | Argininosuccinate synthase                                        | ASS1      | 0.92 | 3.20 | 0.06  | 0.07  | -0.60 | -0.04 | -2.04 | 0.68  | 0.78  | -0.47 | -0.21 | 1.77  |
| P00813 | Adenosine deaminase                                               | ADA       | 0.92 | 1.15 | -0.43 | -0.60 | -0.81 | -0.62 | 1.17  | -0.56 | -0.68 | 1.91  | 1.16  | -0.54 |
| Q9NVZ3 | Adaptin ear-binding coat-associated protein 2                     | NECAP2    | 0.92 | 2.05 | -0.66 | -0.49 | 1.03  | 0.03  | -1.85 | -1.00 | 0.38  | 0.72  | 0.42  | 1.41  |
| Q14232 | Translation initiation factor eIF-2B subunit alpha                | EIF2B1    | 0.92 | 3.94 | -1.41 | 0.22  | -0.01 | 0.15  | -1.83 | -0.07 | 0.62  | 1.49  | -0.13 | 0.98  |
| P53611 | Geranylgeranyl transferase type-2 subunit beta                    | RABGGTB   | 0.92 | 3.00 | 0.21  | -0.45 | -0.98 | 0.64  | -1.88 | 0.88  | 1.00  | -0.92 | 0.54  | 0.95  |
| Q9Y6X9 | ATPase MORC2                                                      | MORC2     | 0.92 | 0.73 | 0.68  | -0.32 | -0.70 | -0.14 | -0.43 | 1.63  | 1.62  | -1.34 | -0.19 | -0.81 |
| P12956 | X-ray repair cross-complementing protein 6                        | XRCC6     | 0.92 | 3.07 | 0.59  | -1.70 | -1.34 | 0.51  | -0.58 | 1.45  | -0.20 | -0.24 | 0.64  | 0.88  |
| Q7L2H7 | Eukaryotic translation initiation factor 3 subunit M              | EIF3M     | 0.91 | 1.09 | 0.80  | -0.64 | -1.45 | 0.02  | 0.04  | 1.54  | 1.20  | -1.22 | -0.65 | 0.37  |
| O00264 | Membrane-associated progesterone receptor component 1             | PGRMCI1   | 0.91 | 1.90 | -0.81 | 0.92  | 0.50  | -0.21 | -2.31 | 0.81  | 0.39  | -0.41 | 0.19  | 0.92  |
| Q15345 | Leucine-rich repeat-containing protein 41                         | LRRC41    | 0.91 | 1.39 | 1.48  | -0.74 | -0.79 | -0.70 | -0.72 | 1.26  | 0.97  | -1.00 | -0.60 | 0.86  |
| P39880 | Homeobox protein cut-like 1                                       | CUX1      | 0.91 | 1.56 | -0.33 | -0.67 | -0.74 | 0.71  | -0.60 | -0.50 | 2.05  | 1.33  | -0.66 | -0.58 |
| O95678 | Keratin, type II cytoskeletal 75                                  | KRT75     | 0.91 | 0.71 | -0.55 | 1.57  | -0.66 | -0.62 | -0.62 | -0.65 | -0.54 | 1.86  | 0.75  | -0.54 |
| P43121 | Cell surface glycoprotein MUC18                                   | MUCAM     | 0.91 | 1.40 | -0.86 | 0.95  | -0.52 | 0.02  | -1.08 | -0.95 | -0.93 | 1.45  | 1.28  | 0.64  |
| P41218 | Myeloid cell nuclear differentiation antigen                      | MNDA      | 0.91 | 1.62 | 0.28  | -0.69 | -0.89 | 0.70  | -1.06 | 0.19  | -1.44 | 1.58  | 1.17  | 0.16  |
| Q9NR30 | Nucleolar RNA helicase 2                                          | DDX21     | 0.91 | 3.28 | 0.02  | -0.54 | 0.03  | 0.17  | -2.28 | -0.01 | 0.21  | 1.80  | 0.38  | 0.23  |
| Q5VZE5 | N-alpha-acetyltransferase 35, NatC auxiliary subunit              | NAA35     | 0.91 | 0.85 | 0.66  | 0.57  | -1.27 | 0.23  | -1.21 | 1.00  | 1.46  | -1.38 | 0.16  | -0.22 |
| O60763 | General vesicular transport factor p115                           | USO1      | 0.90 | 0.94 | 1.38  | 0.01  | -0.79 | -0.32 | -1.37 | 1.23  | 1.26  | -1.04 | -0.52 | 0.17  |
| O95671 | Probable bifunctional dTTP/UTP pyrophosphatase/methyltransferase  | ASMTL     | 0.90 | 1.11 | 1.57  | -1.92 | -0.59 | -0.03 | -0.29 | 0.81  | 1.08  | -0.53 | 0.33  | -0.44 |
| Q68CY4 | NADH-cytochrome b5 reductase 2                                    | CYBSR2    | 0.90 | 1.16 | -0.22 | -0.33 | -0.46 | -0.35 | 0.02  | -0.39 | -0.34 | 2.82  | -0.36 | -0.39 |
| P28702 | Retinoic acid receptor RXR-beta                                   | RXR8      | 0.90 | 1.60 | 0.21  | -1.01 | -1.21 | -1.03 | 1.40  | -0.97 | 0.40  | 0.05  | 1.15  | 1.02  |
| P63208 | S-phase kinase-associated protein 1                               | SKP1      | 0.90 | 1.04 | 0.17  | 0.27  | -0.62 | -1.44 | 0.43  | -0.79 | -0.12 | 2.24  | -0.61 | 0.48  |
| Q8IX11 | Mitochondrial Rho GTPase 2                                        | RHOT2     | 0.90 | 1.19 | -0.38 | -0.56 | -0.66 | -0.54 | 0.79  | -0.54 | -0.53 | -0.91 | 1.28  | 2.04  |
| P09871 | Complement C1s subcomponent                                       | C1S       | 0.90 | 1.18 | 0.13  | 0.97  | -1.01 | -0.38 | -1.01 | -0.93 | 1.29  | 0.62  | -1.04 | 1.37  |
| P27824 | Calnexin                                                          | CANX      | 0.90 | 2.72 | 0.34  | -0.04 | -0.48 | -0.43 | -1.72 | 1.41  | 0.56  | -1.06 | -0.02 | 1.44  |
| P18669 | Phosphoglycerate mutase 1                                         | PGAM1     | 0.89 | 4.13 | -1.45 | 0.52  | 0.05  | -0.23 | -1.95 | 1.01  | 0.89  | 0.44  | -1.03 | 0.86  |
| P07093 | Glia-derived nexin                                                | SERPINE2  | 0.89 | 1.47 | -0.02 | -0.78 | -2.00 | -0.22 | 1.46  | -0.58 | 0.52  | 1.12  | 0.59  | -0.08 |
| Q5TEA3 | Uncharacterized protein C20orf194                                 | C20orf194 | 0.89 | 0.86 | 0.42  | 0.72  | 0.41  | 0.02  | -2.61 | 0.53  | 0.40  | -0.69 | 0.18  | 0.63  |
| P50502 | Hsc70-interacting protein                                         | ST13      | 0.89 | 2.06 | -0.58 | -1.30 | -0.19 | -0.67 | 0.77  | 0.35  | 1.25  | 1.71  | -1.11 | -0.24 |
| P14317 | Hematopoietic lineage cell-specific protein                       | HCLS1     | 0.89 | 0.72 | 1.11  | 0.40  | -1.98 | -0.15 | -0.26 | 1.10  | 1.24  | -0.77 | -0.29 | -0.40 |



|         |                                                                  |           |      |      |       |       |       |       |       |       |       |       |       |       |
|---------|------------------------------------------------------------------|-----------|------|------|-------|-------|-------|-------|-------|-------|-------|-------|-------|-------|
| Q15661  | Trypsin alpha/beta-1                                             | TPSAB1    | 0.89 | 1.31 | -0.03 | -0.30 | -0.55 | -0.23 | -0.37 | 2.81  | -0.24 | -0.60 | -0.21 | -0.27 |
| O15173  | Membrane-associated progesterone receptor component 2            | PGRCM2    | 0.89 | 2.11 | -0.43 | 0.09  | -0.14 | -1.26 | -0.30 | 1.23  | -0.72 | -0.55 | -0.10 | 2.19  |
| Q14320  | Protein FAM50A                                                   | FAM50A    | 0.89 | 1.59 | 0.40  | -0.55 | -1.78 | 0.31  | -0.02 | -0.65 | -0.48 | 0.45  | 0.21  | 2.09  |
| O75563  | Src kinase-associated phosphoprotein 2                           | SKAP2     | 0.89 | 0.98 | 0.31  | 0.84  | -1.84 | 0.24  | -0.68 | 1.12  | 0.95  | -1.33 | -0.19 | 0.58  |
| Q98V20  | Methylthioribose-1-phosphate isomerase                           | MR11      | 1.21 | 1.14 | 1.21  | -1.14 | -1.59 | 0.32  | -0.69 | 1.38  | -0.30 | 0.66  | 0.67  | -0.51 |
| Q9Y237  | Peptidyl-prolyl cis-trans isomerase NIMA-interacting 4           | PIN4      | 0.88 | 2.02 | -0.66 | 0.06  | 0.83  | 0.19  | -2.38 | -0.53 | 0.41  | 0.75  | 1.03  | 0.31  |
| Q99816  | Tumor susceptibility gene 101 protein                            | TSG101    | 0.88 | 3.27 | 0.15  | -0.34 | 0.07  | -1.03 | -1.46 | 1.17  | 1.35  | -1.10 | 0.07  | 1.13  |
| O14733  | Dual specificity mitogen-activated protein kinase kinase 7       | MAP2K7    | 0.88 | 0.88 | 1.02  | -0.64 | -2.43 | 0.41  | 0.58  | 0.63  | 0.40  | -0.54 | 0.52  | 0.06  |
| Q14914  | Prostaglandin reductase 1                                        | PTGR1     | 0.88 | 4.52 | -0.73 | -0.45 | -0.24 | -0.01 | -1.67 | 1.09  | 0.95  | 1.57  | -0.86 | 0.35  |
| A11GUS  | Rho guanine nucleotide exchange factor 37                        | ARHGGEF37 | 0.88 | 1.30 | 0.79  | -0.53 | -0.63 | -0.56 | -0.51 | 1.28  | 2.05  | -0.87 | -0.52 | -0.51 |
| Q96RT1  | Erbin                                                            | ERBIN     | 0.88 | 1.98 | -1.45 | 0.96  | -0.02 | 0.39  | -1.80 | -0.41 | 0.36  | 0.05  | 0.52  | 1.42  |
| O14618  | Copper chaperone for superoxide dismutase                        | CCS       | 0.88 | 2.44 | -0.23 | 0.72  | -1.72 | -0.11 | -0.83 | 1.62  | 0.75  | -0.99 | 0.01  | 0.78  |
| Q07954  | Prolow-density lipoprotein receptor-related protein 1            | LRP1      | 0.88 | 1.63 | 0.65  | 1.16  | -0.87 | -1.88 | -0.75 | -0.46 | 0.65  | -0.24 | 0.53  | 1.20  |
| O95394  | Phosphoacetylglucosamine mutase                                  | PGM3      | 0.88 | 2.03 | -1.35 | -0.60 | 0.41  | 1.16  | -1.58 | 0.88  | -0.86 | 0.69  | 0.47  | 0.79  |
| P40306  | Proteasome subunit beta type-10                                  | PSMB10    | 0.88 | 2.51 | -0.70 | -2.02 | 0.38  | 0.25  | -0.11 | 0.67  | -0.99 | 1.44  | 0.31  | 0.78  |
| Q14571  | Inositol 1,4,5-trisphosphate receptor type 2                     | ITPR2     | 0.87 | 1.39 | 0.52  | -1.43 | -2.08 | 0.27  | 1.18  | 0.70  | -0.09 | 0.16  | 0.16  | 0.61  |
| P49336  | Cyclin-dependent kinase 8                                        | CDK8      | 0.87 | 1.17 | 1.26  | -0.57 | -0.81 | -0.49 | -0.69 | 0.82  | -0.48 | 2.05  | -0.61 | -0.48 |
| P32455  | Guanylate-binding protein 1                                      | GBP1      | 0.87 | 1.21 | 0.46  | 1.08  | -0.35 | -1.16 | -1.37 | 1.34  | 0.93  | 0.05  | -1.25 | 0.26  |
| Q8NF28  | Cell adhesion molecule 4                                         | CADM4     | 0.87 | 1.03 | -0.91 | 0.23  | 0.60  | 0.06  | -1.18 | -0.88 | 0.51  | 2.18  | 0.14  | -0.76 |
| Q96N67  | Dedicator of cytokinesis protein 7                               | DOCK7     | 0.87 | 1.52 | -2.35 | 0.69  | -0.76 | 0.72  | 0.09  | 1.14  | 0.57  | -0.35 | -0.10 | 0.35  |
| P13010  | X-ray repair cross-complementing protein 5                       | XRCC5     | 0.87 | 2.05 | 0.39  | -1.49 | -0.75 | 0.52  | -0.60 | 1.42  | -1.44 | 0.50  | 0.76  | 0.71  |
| Q9UIA0  | Cytohesin-4                                                      | CYTH4     | 0.87 | 0.79 | 0.92  | 0.45  | -0.86 | -0.70 | -0.77 | 1.45  | 1.52  | -1.02 | -0.19 | -0.79 |
| Q9UCF7  | Cytoplasmic phosphatidylinositol transfer protein 1              | PITPNK1   | 0.87 | 1.18 | -0.02 | 0.86  | -1.05 | 0.35  | -1.44 | 0.90  | 0.80  | -1.65 | 0.73  | 0.52  |
| P54198  | Protein HIRA                                                     | HIRA      | 0.87 | 1.26 | 1.35  | -0.58 | -0.90 | -0.52 | -0.72 | 1.17  | 1.75  | -0.37 | -0.64 | -0.53 |
| Q8NSD0  | WD and tetratricopeptide repeats protein 1                       | WDTC1     | 0.87 | 1.24 | 1.07  | 0.37  | -1.09 | -0.66 | -1.05 | 0.92  | 1.80  | -0.07 | -0.47 | -0.82 |
| Q13618  | Cullin-3                                                         | CUL3      | 0.87 | 1.34 | 1.18  | -0.46 | -0.39 | -0.65 | -1.12 | 1.55  | 1.51  | -0.44 | -0.59 | -0.58 |
| O14497  | AT-rich interactive domain-containing protein 1A                 | ARID1A    | 0.87 | 2.41 | -0.55 | -0.67 | 0.41  | -0.55 | -0.87 | -0.83 | -0.88 | 0.84  | 1.49  | 1.62  |
| Q71F56  | Mediator of RNA polymerase II transcription subunit 13-like      | MED13L    | 0.87 | 1.48 | -0.09 | -0.26 | -0.60 | -0.32 | -0.35 | -0.19 | -0.40 | 2.82  | -0.38 | -0.22 |
| Q13642  | Four and a half LIM domains protein 1                            | FHL1      | 0.87 | 2.01 | 0.32  | -0.72 | -1.83 | -0.02 | 0.34  | 1.55  | 0.62  | -1.19 | 0.11  | 0.83  |
| O75083  | WD repeat-containing protein 1                                   | WDR1      | 0.87 | 2.83 | -1.54 | -0.25 | -0.73 | 0.40  | -0.29 | 1.99  | -0.45 | -0.52 | 0.26  | 1.13  |
| Q9H0W9  | Ester hydrolase C11orf54                                         | C11orf54  | 0.86 | 1.15 | 1.13  | -0.54 | -0.68 | -0.55 | -0.65 | 0.55  | -0.55 | 2.27  | -0.45 | -0.53 |
| O75190  | DnaJ homolog subfamily B member 6                                | DNAJB6    | 0.86 | 1.58 | 0.00  | -1.36 | -0.59 | 0.24  | 0.05  | -0.71 | -1.04 | 2.00  | 0.42  | 0.98  |
| Q9POV9  | Septin-10                                                        | SEPTIN10  | 0.86 | 3.28 | -0.46 | -1.45 | 0.57  | -1.57 | 0.31  | 1.42  | 0.83  | -0.08 | -0.48 | 0.91  |
| Q8TAD8  | Smad nuclear-interacting protein 1                               | SNIP1     | 0.86 | 1.69 | 1.00  | -1.05 | -1.26 | -0.55 | 0.16  | 1.39  | 1.40  | 0.11  | -0.18 | -1.02 |
| P30043  | Flavin reductase (NADPH)                                         | BLVRB     | 0.86 | 2.30 | 0.15  | -0.44 | -0.95 | 0.10  | -1.01 | 1.52  | 1.11  | -1.60 | 0.36  | 0.77  |
| P10398  | Serine/threonine-protein kinase A-Raf                            | ARAF      | 0.86 | 1.22 | -0.64 | 0.03  | -1.15 | -0.90 | 1.33  | -0.82 | -0.81 | 1.16  | 0.49  | 1.33  |
| P21810  | Biglycan                                                         | BGN       | 0.86 | 1.06 | 0.58  | 0.42  | 0.33  | -0.99 | -1.55 | -1.47 | 0.46  | 0.74  | 0.04  | 1.44  |
| P68402  | Platelet-activating factor acetylhydrolase 1B subunit beta       | PAFAH1B2  | 0.86 | 5.06 | -0.09 | -1.75 | -0.48 | 0.23  | -1.15 | -0.16 | 1.04  | 1.73  | 0.34  | 0.29  |
| Q86X55  | Histone-arginine methyltransferase CARM1                         | CARM1     | 0.86 | 2.99 | -0.42 | 0.61  | -0.81 | -0.21 | -1.62 | 1.63  | 1.28  | -0.82 | 0.42  | -0.05 |
| Q9Y333  | U6 snRNA-associated Sm-like protein LSM2                         | LSM2      | 0.86 | 1.27 | -0.15 | -0.23 | -0.55 | -0.17 | -0.36 | 2.81  | -0.24 | -0.61 | -0.23 | -0.28 |
| Q8TF39  | Zinc finger protein 483                                          | ZNF483    | 0.86 | 1.34 | 1.36  | -0.14 | -1.69 | 0.54  | -1.54 | 0.67  | 0.21  | -0.54 | 0.87  | 0.27  |
| Q9P0K9  | DOMON domain-containing protein FRRS1L                           | FRRS1L    | 0.86 | 1.29 | 1.18  | -0.65 | -0.80 | -0.59 | -0.55 | 1.28  | -0.50 | 1.81  | -0.69 | -0.51 |
| Q9ULBC2 | Epidermal growth factor receptor substrate 15-like 1             | EPS15L1   | 0.86 | 1.23 | 0.87  | 0.22  | -1.25 | -0.47 | -0.73 | 0.61  | 2.04  | -1.15 | 0.00  | -0.14 |
| Q8TCU6  | Phosphatidylinositol 3,4,5-trisphosphate-dependent Rac exchanger | PREX1     | 0.86 | 0.80 | 1.30  | -0.51 | -1.41 | -0.32 | -0.03 | 1.50  | 1.05  | -1.24 | -0.10 | -0.24 |
| Q15293  | Reticulocalbin-1                                                 | RCN1      | 0.86 | 0.93 | -0.67 | 0.59  | 0.58  | -0.12 | -1.46 | 1.01  | 0.86  | -1.84 | 0.47  | 0.60  |
| P78371  | T-complex protein 1 subunit beta                                 | CCT2      | 0.85 | 2.80 | 0.26  | -0.21 | -1.20 | -0.37 | -0.91 | 0.35  | 0.74  | 2.28  | -0.76 | -0.19 |
| P22234  | Multifunctional protein ADE2                                     | PAICS     | 0.85 | 1.48 | -0.10 | -1.85 | 0.32  | -0.92 | 1.01  | 1.26  | -0.25 | 1.28  | -0.40 | -0.34 |
| P53602  | Diphosphomevalonate decarboxylase                                | MVD       | 0.85 | 2.92 | -1.69 | 0.41  | -0.47 | 0.75  | -1.46 | 0.44  | 1.16  | -0.60 | 0.95  | 0.50  |
| P49411  | Alpha-aminoadipic semialdehyde dehydrogenase                     | ALDH7A1   | 0.85 | 1.27 | -0.33 | -0.71 | -0.16 | -0.37 | 0.14  | 0.64  | -1.34 | 2.43  | -0.01 | -0.28 |
| P12532  | Creatine kinase U-type, mitochondrial                            | CKMT1A    | 0.85 | 1.70 | -0.81 | -0.74 | -0.16 | -0.54 | 0.49  | -0.16 | -0.39 | 2.64  | -0.31 | -0.02 |
| P24534  | Blongation factor 1-beta                                         | EEF1B2    | 0.85 | 2.41 | 0.13  | -0.45 | -1.01 | -0.36 | -0.57 | 1.47  | 1.17  | -1.54 | -0.02 | 1.18  |
| Q8N944  | APC membrane recruitment protein 3                               | AMER3     | 0.85 | 1.79 | -0.25 | 0.10  | -0.80 | -0.40 | -0.51 | 2.43  | 0.97  | -0.91 | -0.34 | -0.29 |
| Q99973  | Telomerase protein component 1                                   | TEP1      | 0.85 | 1.19 | 1.40  | -0.88 | -0.10 | -0.89 | -0.83 | 1.26  | 0.92  | 0.88  | -0.84 | -0.91 |
| Q9HCG8  | Pre-mRNA-splicing factor CWC22 homolog                           | CWC22     | 0.85 | 1.99 | 0.51  | -0.60 | -0.84 | -0.50 | -0.53 | 1.33  | 1.94  | -1.10 | 0.33  | -0.54 |
| O14672  | Disintegrin and metalloproteinase domain-containing protein 10   | ADAM10    | 0.85 | 1.60 | -0.20 | -0.40 | -0.64 | -0.21 | -0.27 | -0.38 | -0.21 | 2.82  | -0.34 | -0.17 |
| P49720  | Proteasome subunit beta type-3                                   | PSMB3     | 0.85 | 2.05 | -0.62 | -1.85 | -0.03 | -0.41 | 0.96  | 0.04  | -0.63 | 1.86  | 0.20  | 0.47  |
| Q9UBB6  | Neurochondrin                                                    | NCDN      | 0.85 | 2.86 | -0.83 | 0.02  | 0.70  | -0.76 | -1.54 | 0.61  | 1.82  | -0.26 | -0.63 | 0.85  |
| P05141  | ADP/ATP translocase 2                                            | SLC25A5   | 0.85 | 1.63 | 1.92  | -1.26 | -1.14 | -0.95 | -0.28 | 0.86  | -0.13 | 0.43  | -0.14 | 0.69  |
| P30530  | Tyrosine-protein kinase receptor UFO                             | AXL       | 0.85 | 1.17 | -0.38 | -0.51 | -0.69 | 0.95  | -0.67 | -0.53 | -0.56 | -0.87 | 1.74  | 1.54  |
| O00422  | Histone deacetylase complex subunit SAP18                        | SAP18     | 0.85 | 0.90 | 1.27  | -0.50 | -0.61 | -0.58 | -0.63 | 1.61  | 1.43  | -0.86 | -0.56 | -0.57 |
| P29762  | Cellular retinoic acid-binding protein 1                         | CRABP1    | 0.85 | 1.04 | -0.06 | -0.18 | -0.35 | -0.61 | -0.02 | 1.14  | 1.71  | -1.58 | -0.95 | 0.91  |
| P55081  | Microfibrillar-associated protein 1                              | MFAP1     | 0.85 | 1.08 | -0.36 | -0.96 | -1.33 | 0.58  | 0.84  | -0.66 | -0.88 | 1.62  | 1.15  | -0.01 |
| P25787  | Proteasome subunit alpha type-2                                  | PSMA2     | 0.85 | 3.25 | -1.16 | -2.03 | 0.14  | -0.24 | 0.66  | 0.17  | 0.26  | 1.50  | -0.13 | 0.82  |
| Q96CB8  | Integrator complex subunit 12                                    | INTS12    | 0.85 | 1.10 | 0.04  | -1.21 | -0.09 | -0.70 | 0.71  | 1.68  | 1.23  | -1.46 | 0.08  | -0.28 |
| P48637  | Glutathione synthetase                                           | GSS       | 0.85 | 1.16 | 0.56  | 0.35  | -1.74 | -1.02 | 0.55  | 0.75  | 0.70  | 1.39  | -0.67 | -0.88 |
| Q13325  | Interferon-induced protein with tetratricopeptide repeats 5      | IFIT5     | 0.85 | 1.24 | 0.03  | -1.44 | -1.66 | 0.92  | 0.77  | 0.63  | 0.47  | -1.07 | 0.87  | 0.47  |
| Q15435  | Protein phosphatase 1 regulatory subunit 7                       | PPP1R7    | 0.85 | 2.47 | 0.29  | -1.20 | -0.63 | 0.74  | -1.38 | -1.17 | 0.59  | 1.25  | 1.07  | 0.44  |
| P55036  | 26S proteasome non-ATPase regulatory subunit 4                   | PSMD4     | 0.85 | 1.87 | 0.84  | 0.21  | -1.77 | 0.41  | -1.53 | 0.38  | 0.39  | 1.42  | 0.16  | -0.50 |
| Q86UX7  | Fermitin family homolog 3                                        | FERMT3    | 0.84 | 2.20 | -0.54 | 0.81  | -0.69 | -0.34 | -1.29 | 2.30  | -0.19 | -0.25 | -0.37 | 0.55  |
| O75821  | Eukaryotic translation initiation factor 3 subunit G             | EIF3G     | 0.84 | 0.98 | 1.39  | -0.08 | -1.04 | -0.24 | -1.16 | 1.42  | 1.07  | -1.10 | -0.43 | 0.17  |
| P17661  | Desmin                                                           | DES       | 0.84 | 0.54 | 1.31  | -0.71 | -0.82 | 0.28  | -0.74 | 1.24  | 1.56  | -0.82 | -0.65 | -0.64 |
| Q6GMV2  | SET and MYND domain-containing protein 5                         | SMYD5     | 0.84 | 1.83 | 1.29  | -1.23 | -0.62 | -0.46 | -0.77 | 1.47  | 1.40  | -0.44 | -0.54 | -0.10 |
| P30038  | Delta-1-pyrroline-5-carboxylate dehydrogenase, mitochondrial     | ALDH4A1   | 0.84 | 1.85 | -1.23 | 0.16  | 0.23  | -0.78 | -0.22 | 2.00  | -0.84 | 1.35  | -0.38 | -0.28 |
| Q3KQV9  | UDP-N-acetylhexosamine pyrophosphorylase-like protein 1          | UAP1L1    | 0.84 | 3.36 | -0.16 | -2.26 | 0.86  | -0.60 | -0.58 | 1.10  | 0.34  | 0.31  | -0.01 | 1.00  |
| P06132  | Uroporphyrinogen decarboxylase                                   | UROD      | 0.84 | 1.50 | -0.10 | -0.37 | -0.50 | -0.39 | -0.28 | -0.40 | -0.24 | 2.83  | -0.32 | -0.23 |
| P48059  | LIM and senescent cell antigen-like-containing domain protein 1  | LIMS1     | 0.84 | 3.97 | -1.92 | -0.34 | -1.09 | 0.31  | 0.15  | 0.97  | -0.59 | 0.24  | 1.14  | 1.12  |
| Q9Y6Y1  | Calmodulin-binding transcription activator 1                     | CAMTA1    | 0.84 | 0.80 | 1.44  | -0.58 | -0.72 | -0.51 | -0.58 | 1.34  | 1.55  | -0.80 | -0.56 | -0.56 |
| Q9UHL4  | Dipeptidyl peptidase 2                                           | DPP7      | 0.84 | 0.99 | 0.71  | -0.43 | -0.58 | -0.39 | -0.48 | -0.40 | -0.47 | 2.64  | -0.49 | -0.11 |
| Q6PJ69  | Tripartite motif-containing protein 65                           | TRIM65    | 0.84 | 0.60 | -1.03 | 0.52  | 0.45  | 0.44  | -1.14 | -1.15 | -1.15 | 1.19  | 0.65  | 1.22  |
| Q5VZK9  | F-actin-uncapping protein LRRC16A                                | CARMIL1   | 0.84 | 1.47 | 1.23  | 0.23  | -1.42 | -0.92 | -0.66 | 0.49  | 0.55  | 0.24  | -1.20 | 1.45  |
| P12268  | Inosine-5'-monophosphate dehydrogenase 2                         | IMPDH2    | 0.84 | 1.22 | 0.23  | 0.04  | -1.16 | 0.24  | -0.72 | 2.18  | 0.41  | -1.44 | 0.06  | 0.17  |
| P51149  | Ras-related protein Rab-7a                                       | RAB7A     | 0.84 | 1.40 | 1.30  | -1.21 | -0.31 | 0.04  | -1.30 | 1.98  | -0.31 | -0.17 | 0.11  | -0.13 |
| P08603  | Complement factor H                                              | CFH       | 0.84 | 1.06 | -1.34 | -1.44 | 1.02  | 0.85  | -0.30 | -0.20 | -0.96 | 1.27  | 0.74  | 0.36  |

|        |                                                                     |          |      |      |       |       |       |       |       |       |       |       |       |       |
|--------|---------------------------------------------------------------------|----------|------|------|-------|-------|-------|-------|-------|-------|-------|-------|-------|-------|
| P00736 | Complement C1r subcomponent                                         | C1R      | 0.84 | 1.62 | -0.56 | 0.81  | -1.14 | 0.15  | -0.94 | 1.23  | -0.87 | -0.64 | 0.18  | 1.77  |
| Q9Y508 | E3 ubiquitin-protein ligase RNF114                                  | RNF114   | 0.84 | 0.95 | 0.50  | -0.37 | -1.51 | 0.70  | -0.42 | 1.26  | -0.15 | -1.64 | 0.73  | 0.90  |
| Q9NV59 | Pyridoxine-5'-phosphate oxidase                                     | PNPO     | 0.84 | 1.07 | -1.16 | 0.42  | -0.50 | 0.34  | -0.34 | 0.55  | -1.92 | 1.58  | 0.45  | 0.58  |
| Q96Q11 | CCA tRNA nucleotidyltransferase 1, mitochondrial                    | TRNT1    | 0.84 | 1.28 | -1.20 | -0.12 | 0.26  | 1.03  | -1.36 | -1.39 | 0.59  | 0.62  | 1.37  | 0.20  |
| P30622 | CAP-Gly domain-containing linker protein 1                          | CLIP1    | 0.84 | 0.87 | 0.52  | 0.37  | -1.22 | -0.99 | 0.28  | 1.51  | 1.20  | -1.37 | -0.60 | 0.30  |
| Q96JM3 | Chromosome alignment-maintaining phosphoprotein 1                   | CHAMP1   | 0.83 | 0.71 | 1.08  | -1.22 | -1.41 | 0.38  | 0.30  | 0.98  | 0.43  | -1.49 | 0.08  | 0.88  |
| P01602 | Immunoglobulin kappa variable 1-5                                   | IGKV1-5  | 0.83 | 1.15 | -0.01 | -0.26 | -0.54 | -0.15 | -0.37 | 2.80  | -0.22 | -0.60 | -0.34 | -0.32 |
| P13693 | Translationally-controlled tumor protein                            | TPT1     | 0.83 | 4.11 | -0.39 | 0.64  | -0.65 | -0.90 | -1.62 | 0.91  | 0.26  | 1.61  | -0.66 | 0.81  |
| P62937 | Peptidyl-prolyl cis-trans isomerase A                               | PPIA     | 0.83 | 2.64 | -1.63 | 0.48  | 0.77  | -0.05 | -1.99 | 0.51  | 0.87  | 0.10  | 0.34  | 0.62  |
| P15121 | Aldo-keto reductase family 1 member B1                              | AKR1B1   | 0.83 | 1.32 | -0.94 | -1.56 | 1.02  | 0.80  | -0.74 | 0.38  | -1.08 | 1.01  | 1.05  | 0.07  |
| P55884 | Eukaryotic translation initiation factor 3 subunit B                | EIF3B    | 0.83 | 2.31 | -1.95 | 0.90  | -0.64 | 0.07  | -0.49 | 0.77  | -0.64 | 0.02  | 0.33  | 1.62  |
| P40121 | Macrophage-capping protein                                          | CAPG     | 0.83 | 1.31 | -1.64 | 0.98  | -0.75 | 0.53  | -0.53 | 1.36  | -0.28 | -1.09 | 0.53  | 0.90  |
| P49736 | DNA replication licensing factor MCM2                               | MCM2     | 0.83 | 1.01 | 0.28  | 0.25  | -1.18 | -1.09 | 0.57  | 0.27  | -0.04 | 2.17  | -0.16 | -1.07 |
| Q96MU7 | YTH domain-containing protein 1                                     | YTHDC1   | 0.83 | 0.96 | 0.95  | -1.56 | -0.46 | -0.61 | 0.56  | 0.79  | 1.16  | 0.77  | -0.16 | -1.46 |
| Q13501 | Sequestosome-1                                                      | SQSTM1   | 0.83 | 1.55 | -1.14 | 0.00  | -0.21 | -0.58 | 0.30  | -0.52 | 0.51  | 2.50  | -0.60 | -0.26 |
| Q66P33 | ADP-ribosylation factor-like protein 6-interacting protein 4        | ARL6IP4  | 0.82 | 1.36 | 0.15  | -2.05 | -1.00 | -0.07 | 1.48  | 0.24  | 1.14  | 0.40  | -0.07 | -0.22 |
| Q86T65 | Disheveled-associated activator of morphogenesis 2                  | DAAM2    | 0.82 | 2.31 | -2.10 | -0.24 | -0.20 | 1.04  | -0.61 | -0.49 | 0.38  | 1.00  | 1.29  | -0.05 |
| Q07890 | Son of sevenless homolog 2                                          | SOS2     | 0.82 | 0.65 | 0.70  | 1.05  | -1.31 | 0.00  | -1.25 | 0.72  | 0.99  | -1.46 | -0.12 | 0.68  |
| Q81Z81 | ELMO domain-containing protein 2                                    | ELMOD2   | 0.82 | 1.54 | 0.31  | -0.07 | -2.44 | 0.29  | 0.30  | 1.17  | -0.36 | -0.55 | 0.50  | 0.85  |
| Q727L1 | Schlafen family member 11                                           | SLFN11   | 0.82 | 1.12 | -0.06 | -0.30 | -0.46 | -0.20 | -0.29 | -0.25 | -0.24 | -0.68 | -0.33 | 2.81  |
| P21953 | 2-oxoisovalerate dehydrogenase subunit beta, mitochondrial          | BCKDHB   | 0.82 | 1.90 | 0.42  | -1.37 | -0.17 | 0.63  | -1.36 | 0.57  | 0.80  | 0.58  | 1.24  | -1.35 |
| P37837 | Transaldolase                                                       | TALDO1   | 0.82 | 1.27 | -0.49 | -0.50 | -0.06 | -0.01 | -0.40 | -0.56 | -0.48 | 2.74  | 0.23  | -0.48 |
| Q13424 | Alpha-1-syntrophin                                                  | SNTA1    | 0.82 | 2.38 | -1.97 | -0.90 | 0.57  | 0.14  | 0.02  | 0.41  | -0.88 | 1.57  | 0.59  | 0.44  |
| Q9NRX1 | RNA-binding protein PNO1                                            | PNO1     | 0.82 | 0.85 | 0.52  | -1.01 | -1.14 | 0.65  | -0.04 | 1.77  | 0.52  | -1.15 | 0.73  | -0.85 |
| Q75947 | ATP synthase subunit d, mitochondrial                               | ATP5PD   | 0.82 | 0.84 | 1.37  | -0.71 | -0.82 | -0.66 | -0.19 | 1.36  | 1.53  | -0.87 | -0.37 | -0.64 |
| Q93100 | Phosphorylase b kinase regulatory subunit beta                      | PHKB     | 0.82 | 1.24 | -0.02 | 0.31  | -1.58 | 0.39  | -0.46 | 1.71  | -1.51 | 0.21  | 0.07  | 0.88  |
| P36955 | Pigment epithelium-derived factor                                   | SERPINF1 | 0.82 | 1.27 | 1.41  | 0.03  | -1.49 | -0.76 | -0.56 | 0.84  | 0.14  | 1.39  | -1.11 | 0.12  |
| Q43414 | ERI1 exonuclease 3                                                  | ERI3     | 0.82 | 1.88 | 0.92  | -1.11 | -1.49 | 0.85  | -1.02 | -0.82 | 1.00  | 0.17  | 0.99  | 0.51  |
| Q9Y3A5 | Ribosome maturation protein SBDS                                    | SBDS     | 0.82 | 2.92 | -0.21 | -1.38 | 0.67  | 0.12  | -1.63 | 0.93  | 1.72  | -0.24 | 0.20  | -0.18 |
| Q9BXC9 | Bardet-Biedl syndrome 2 protein                                     | BBS2     | 0.81 | 1.46 | 0.54  | 0.21  | -2.51 | 0.06  | 0.15  | 0.79  | -0.75 | 0.99  | 0.12  | 0.41  |
| Q12765 | Secernin-1                                                          | SCRN1    | 0.81 | 4.08 | -1.30 | -0.52 | 0.25  | 0.43  | -1.81 | 1.74  | 0.05  | 0.40  | 0.49  | 0.27  |
| Q9NTM9 | Copper homeostasis protein cutC homolog                             | CUTC     | 0.81 | 4.12 | 0.85  | -1.30 | -1.72 | -0.40 | -0.41 | 1.14  | 1.21  | -0.10 | 0.71  | 0.02  |
| Q9HCS7 | Pre-mRNA-splicing factor SYF1                                       | XAB2     | 0.81 | 1.81 | 0.86  | -1.95 | -0.17 | -0.61 | 0.09  | 0.78  | 1.44  | 0.72  | -0.25 | -0.90 |
| Q86YQ8 | Copine-8                                                            | CPNE8    | 0.81 | 1.88 | -0.23 | -0.43 | -0.53 | -0.36 | -0.39 | -0.34 | 2.16  | -0.98 | -0.41 | 1.51  |
| Q9UBQ5 | Eukaryotic translation initiation factor 3 subunit K                | EIF3K    | 0.81 | 0.96 | 1.36  | -1.26 | 0.04  | 0.01  | -1.26 | 1.11  | -1.18 | -0.27 | 0.37  | 1.08  |
| Q92609 | TBC1 domain family member 5                                         | TBC1D5   | 0.81 | 0.99 | 1.38  | 0.23  | -1.32 | -0.44 | -0.99 | -1.15 | 1.22  | 0.36  | -0.32 | 1.04  |
| Q95210 | Starch-binding domain-containing protein 1                          | STBD1    | 0.81 | 0.81 | -0.60 | 0.57  | -1.59 | 0.87  | -0.21 | -0.04 | 1.37  | 0.37  | 0.80  | -1.53 |
| Q43924 | Retinal rod rhodopsin-sensitive cGMP 3',5'-cyclic phosphodiesterase | PDE6D    | 0.81 | 2.61 | -0.41 | -1.58 | -0.01 | 0.47  | -0.75 | 0.44  | -1.18 | 1.04  | 0.30  | 1.68  |
| Q96A65 | Exocyst complex component 4                                         | EXOC4    | 0.81 | 1.67 | 1.01  | 0.15  | -2.15 | 0.29  | -1.02 | 0.50  | 1.24  | -0.52 | 0.35  | 0.16  |
| P55263 | Adenosine kinase                                                    | ADK      | 0.80 | 0.99 | -0.43 | -0.81 | -0.90 | 0.47  | 0.51  | -1.86 | 0.03  | 1.49  | 0.57  | 0.93  |
| Q00505 | Importin subunit alpha-4                                            | KPNA3    | 0.80 | 3.47 | -1.22 | -1.41 | -0.92 | 0.13  | 0.74  | 1.02  | 0.04  | -0.67 | 1.21  | 1.08  |
| P61513 | 60S ribosomal protein L37a                                          | RPL37A   | 0.80 | 4.31 | 0.45  | -1.51 | -1.42 | 0.14  | -0.66 | 1.04  | 1.38  | -0.46 | 0.13  | 0.91  |
| Q86UK7 | E3 ubiquitin-protein ligase ZNF598                                  | ZNF598   | 0.80 | 1.59 | 1.46  | -0.27 | -2.29 | -0.39 | -0.20 | 0.42  | 0.89  | -0.32 | 0.43  | 0.28  |
| Q96ME1 | F-box/LRR-repeat protein 18                                         | FBXL18   | 0.80 | 1.19 | -0.72 | 0.72  | -1.06 | 0.63  | -0.89 | -0.91 | 0.83  | 1.79  | 0.45  | -0.84 |
| P51606 | N-acetylglucosamine 2-epimerase                                     | RENBP    | 0.80 | 1.19 | 1.18  | 0.24  | -0.66 | -1.01 | -1.06 | 0.65  | -0.99 | 1.30  | -0.78 | 1.13  |
| Q9BSJ8 | Extended synaptotagmin-1                                            | ESYT1    | 0.80 | 3.37 | -0.81 | 0.32  | -0.48 | 0.20  | -1.86 | 1.99  | -0.30 | 0.01  | 0.32  | 0.61  |
| Q9UBU9 | Nuclear RNA export factor 1                                         | NXF1     | 0.80 | 1.17 | 0.23  | -1.35 | -0.50 | -0.45 | 0.77  | -0.40 | -1.15 | 2.06  | 0.24  | 0.55  |
| P10644 | cAMP-dependent protein kinase type I-alpha regulatory subunit       | PRKAR1A  | 0.80 | 2.17 | -0.31 | 0.21  | -0.52 | 0.12  | -1.54 | 1.94  | -0.27 | -1.06 | 0.40  | 1.04  |
| P02675 | Fibrinogen beta chain                                               | FGB      | 0.80 | 3.77 | -1.13 | -0.47 | 0.87  | -1.11 | -0.95 | 0.75  | 1.12  | 0.91  | -0.98 | 0.99  |
| P28799 | Progranulin                                                         | GRN      | 0.80 | 1.56 | -1.00 | -1.58 | 0.63  | -0.65 | 0.99  | 0.22  | -0.52 | 1.28  | -0.57 | 1.20  |
| Q9UGK8 | Secretion-regulating guanine nucleotide exchange factor             | SERGEF   | 0.80 | 1.17 | 1.29  | -0.53 | -0.84 | -0.59 | -0.63 | -0.55 | -0.62 | 1.64  | -0.55 | 1.38  |
| Q29RF7 | Sister chromatid cohesion protein PDS5 homolog A                    | PDS5A    | 0.80 | 0.83 | 0.83  | -0.31 | -0.04 | -0.28 | -1.20 | 1.27  | 1.58  | -1.57 | 0.06  | -0.33 |
| P49116 | Nuclear receptor subfamily 2 group C member 2                       | NR2C2    | 0.80 | 1.41 | -0.21 | -0.92 | 0.03  | 0.05  | -0.50 | 0.34  | -0.21 | 2.63  | -0.75 | -0.46 |
| Q9HBG6 | Intraflagellar transport protein 122 homolog                        | IFT122   | 0.80 | 1.02 | 1.16  | -0.83 | -2.07 | 0.33  | 0.23  | 0.70  | -0.32 | -0.58 | 0.11  | 1.26  |
| Q9UH62 | Armadillo repeat-containing X-linked protein 3                      | ARMCX3   | 0.80 | 2.14 | -0.08 | -0.59 | -0.61 | -0.47 | -0.37 | -0.33 | -0.58 | 0.81  | -0.36 | 2.59  |
| Q9NV79 | Armadillo repeat-containing protein 1                               | ARMC1    | 0.80 | 0.70 | 1.67  | -0.66 | -0.70 | -0.59 | -0.59 | -0.55 | -0.60 | 1.38  | -0.64 | 1.28  |
| Q9GZM7 | Tubulointerstitial nephritis antigen-like                           | TINAGL1  | 0.80 | 0.70 | -0.97 | -0.65 | 1.84  | -0.99 | -0.09 | -0.99 | 0.79  | 0.47  | -0.49 | 1.09  |
| P30626 | Sorcin                                                              | SRI      | 0.80 | 2.91 | 0.32  | -1.19 | -0.66 | -1.23 | 0.32  | 1.16  | 1.58  | 0.93  | -0.60 | -0.63 |
| Q00059 | Transcription factor A, mitochondrial                               | TFAM     | 0.80 | 1.11 | 1.28  | -1.22 | 0.24  | -0.55 | -0.99 | 0.90  | 1.31  | 0.73  | -0.70 | -0.99 |
| Q75340 | Programmed cell death protein 6                                     | PDCD6    | 0.80 | 3.55 | -1.38 | -1.37 | -0.60 | -0.09 | 0.74  | 0.03  | -0.29 | 1.57  | 0.08  | 1.32  |
| Q13362 | Serine/threonine-protein phosphatase 2A 56 kDa regulatory subunit   | PPP2R5C  | 0.79 | 1.28 | -0.11 | -0.31 | -0.53 | -0.27 | -0.24 | -0.24 | 2.81  | -0.66 | -0.27 | -0.17 |
| P98175 | RNA-binding protein 10                                              | RBM10    | 0.79 | 1.01 | 1.04  | -0.87 | -2.34 | 0.48  | 0.50  | 0.46  | 0.98  | -0.13 | 0.05  | -0.17 |
| Q95398 | Rap guanine nucleotide exchange factor 3                            | RAPGEF3  | 0.79 | 0.81 | -0.40 | -0.55 | -0.73 | 1.29  | -0.58 | 1.73  | -0.58 | -0.80 | 1.27  | -0.64 |
| Q07157 | Tight junction protein ZO-1                                         | TJP1     | 0.79 | 2.00 | -2.14 | -0.25 | -0.85 | 0.61  | -1.03 | -0.37 | 0.03  | 0.40  | 0.70  | 1.19  |
| Q07866 | Kinesin light chain 1                                               | KLC1     | 0.79 | 1.95 | -2.05 | 0.67  | -1.14 | 0.55  | 0.07  | -0.58 | 0.84  | 0.09  | 0.30  | 1.26  |
| P55084 | Trifunctional enzyme subunit beta, mitochondrial                    | HADHB    | 0.79 | 0.63 | 1.39  | -0.46 | -0.16 | 0.04  | -1.59 | 0.98  | 1.42  | -1.02 | -0.06 | -0.52 |
| P02760 | Protein AMBP                                                        | AMBP     | 0.79 | 1.47 | -0.19 | -0.21 | -0.60 | -0.28 | -0.33 | -0.40 | -0.29 | 2.82  | -0.34 | -0.18 |
| P53778 | Mitogen-activated protein kinase 12                                 | MAPK12   | 0.79 | 1.02 | -0.37 | -0.65 | -0.78 | 1.21  | -0.59 | -0.48 | -0.59 | -0.83 | 1.45  | 1.63  |
| P49773 | Histidine triad nucleotide-binding protein 1                        | HINT1    | 0.79 | 1.94 | -0.92 | -1.30 | 0.44  | -0.16 | 0.04  | 0.43  | 2.36  | 0.06  | 0.06  | -0.57 |
| P10809 | 60 kDa heat shock protein, mitochondrial                            | HSPD1    | 0.79 | 1.65 | -0.63 | -0.83 | 0.54  | -0.78 | -0.01 | 1.63  | 1.11  | 0.97  | -0.66 | -1.33 |
| Q0AV96 | RNA-binding protein 47                                              | RBM47    | 0.79 | 1.14 | -0.47 | 0.57  | -0.74 | -0.51 | -0.15 | -0.57 | 1.71  | -0.93 | -0.66 | 1.75  |
| P35573 | Glycogen debranching enzyme                                         | AGL      | 0.79 | 1.46 | 1.83  | -1.08 | -1.12 | -0.09 | -1.10 | 1.41  | 0.02  | 0.11  | 0.06  | -0.04 |
| Q96GG9 | DCN1-like protein 1                                                 | DCUN1D1  | 0.78 | 2.73 | -1.51 | -0.78 | 0.60  | 0.35  | -0.99 | -0.09 | -0.87 | 1.10  | 0.69  | 1.49  |
| P28062 | Proteasome subunit beta type-8                                      | PSMB8    | 0.78 | 1.68 | -1.19 | -1.79 | 0.63  | 0.24  | 0.42  | 0.53  | -1.05 | 1.42  | 0.50  | 0.30  |
| Q94985 | Calsyntenin-1                                                       | CLSTN1   | 0.78 | 0.79 | 1.24  | 0.09  | -1.88 | -0.15 | -0.24 | 1.23  | 0.93  | 0.30  | -0.41 | -1.10 |
| Q90666 | Neuroblast differentiation-associated protein AHNK                  | AHNK     | 0.78 | 0.86 | -0.03 | -1.86 | 1.57  | -0.55 | -0.16 | 1.04  | 0.07  | -0.64 | -0.46 | 1.02  |
| P51888 | Prolargin                                                           | PRELP    | 0.78 | 2.48 | -0.25 | -0.59 | -0.51 | -0.29 | -0.70 | 1.26  | -0.63 | -1.21 | 1.39  | 1.54  |
| Q8N6Y2 | Leucine-rich repeat-containing protein 17                           | LRRCL17  | 0.78 | 1.39 | -0.14 | -0.25 | -0.54 | -0.24 | -0.38 | -0.35 | -0.27 | 2.83  | -0.39 | -0.27 |
| Q9BX67 | Junctional adhesion molecule C                                      | JAM3     | 0.78 | 1.46 | -0.12 | -0.39 | -0.51 | -0.31 | -0.29 | -0.34 | -0.23 | 2.83  | -0.31 | -0.33 |
| P30084 | Enoyl-CoA hydratase, mitochondrial                                  | ECHS1    | 0.78 | 1.14 | -0.48 | 0.20  | 1.02  | -1.19 | -0.82 | -0.13 | -0.60 | 2.12  | -0.65 | 0.54  |
| P55011 | Solute carrier family 12 member 2                                   | SLC12A2  | 0.78 | 2.09 | 0.07  | 1.20  | -1.59 | -0.26 | -1.40 | 0.82  | -0.15 | -0.43 | 0.33  | 1.41  |
| Q86XN8 | RNA-binding protein MEX3D                                           | MEX3D    | 0.78 | 0.95 | 1.09  | 0.57  | -1.00 | -0.84 | -0.93 | 0.70  | 1.74  | 0.29  | -0.89 | -0.73 |
| Q9UBS8 | E3 ubiquitin-protein ligase RNF14                                   | RNF14    | 0.78 | 0.85 | 0.24  | -1.50 | -1.63 | 1.03  | 0.83  | -0.09 | 0.32  | -0.87 | 0.96  | 0.69  |

|        |                                                                    |          |      |      |       |       |       |       |       |       |       |       |       |       |
|--------|--------------------------------------------------------------------|----------|------|------|-------|-------|-------|-------|-------|-------|-------|-------|-------|-------|
| Q02153 | Guanylate cyclase soluble subunit beta-1                           | GUCY1B1  | 0.78 | 2.03 | 0.44  | -2.24 | -0.26 | 1.00  | -0.92 | 0.35  | -0.33 | 1.08  | 0.62  | 0.27  |
| Q9HB07 | UPF0160 protein MYG1, mitochondrial                                | C12orf10 | 0.78 | 1.44 | 0.27  | -0.56 | 0.78  | -1.29 | -0.73 | 1.63  | 1.13  | -0.12 | -1.35 | 0.24  |
| P12081 | Histidine--tRNA ligase, cytoplasmic                                | HARS     | 0.77 | 4.13 | -1.54 | -1.23 | 0.82  | -0.02 | -1.00 | 0.45  | 0.23  | 1.16  | -0.19 | 1.34  |
| O00754 | Lysosomal alpha-mannosidase                                        | MAN2B1   | 0.77 | 1.40 | -0.20 | 0.00  | -0.61 | -0.42 | -0.32 | -0.24 | -0.29 | 2.81  | -0.46 | -0.26 |
| Q6DD88 | Atlastin-3                                                         | ATL3     | 0.77 | 0.77 | 0.67  | -0.70 | 0.57  | 0.27  | -1.74 | 1.40  | 0.27  | -1.51 | 0.47  | 0.31  |
| Q8TBC4 | NEDD8-activating enzyme E1 catalytic subunit                       | UBA3     | 0.77 | 1.70 | 0.25  | -0.71 | -1.12 | -1.29 | 1.17  | 0.12  | 0.25  | 0.15  | -0.71 | 1.88  |
| Q7KZ17 | Serine/threonine-protein kinase MARK2                              | MARK2    | 0.77 | 1.34 | 1.05  | 0.07  | -1.17 | -0.48 | -0.91 | 1.42  | 1.17  | 0.61  | -0.62 | -1.14 |
| Q6P9B6 | MTOR-associated protein MEAK7                                      | MEAK7    | 0.77 | 0.86 | -0.42 | -0.55 | -0.76 | -0.61 | 1.31  | 1.66  | -0.56 | -0.82 | -0.59 | 1.33  |
| O75167 | Phosphatase and actin regulator 2                                  | PHACTR2  | 0.77 | 0.55 | 0.80  | 0.30  | -0.87 | -0.11 | -0.82 | 1.49  | 1.63  | -0.97 | -0.73 | -0.71 |
| Q9Y6F9 | Protein Wnt-6                                                      | WNT6     | 0.77 | 1.18 | -0.01 | -0.37 | -0.57 | -0.18 | -0.23 | -0.19 | 2.79  | -0.71 | -0.30 | -0.22 |
| O60841 | Eukaryotic translation initiation factor 5B                        | EIF5B    | 0.77 | 3.58 | -0.10 | -1.08 | 0.59  | -0.26 | -1.87 | 0.16  | 0.07  | 1.16  | -0.23 | 1.57  |
| Q9HD89 | Resistin                                                           | RETN     | 0.76 | 1.05 | -0.68 | -0.69 | -0.88 | -0.68 | 1.75  | -0.69 | 1.47  | 0.45  | -0.70 | 0.65  |
| Q15046 | Lysine--tRNA ligase                                                | KARS     | 0.76 | 4.36 | -1.47 | -1.09 | -0.30 | 0.68  | -0.83 | -0.53 | 0.99  | 1.65  | 0.50  | 0.40  |
| P62829 | 60S ribosomal protein L23                                          | RPL23    | 0.76 | 2.72 | 0.95  | -1.61 | -0.87 | 0.43  | -1.26 | 0.48  | 0.88  | -0.67 | 0.57  | 1.10  |
| Q5EBM0 | UMP-CMP kinase 2, mitochondrial                                    | CMPK2    | 0.76 | 0.83 | -0.55 | 0.46  | -1.71 | 0.12  | 0.68  | -0.31 | 0.70  | 1.39  | -1.46 | 0.67  |
| Q9HB90 | Ras-related GTP-binding protein C                                  | RRAGC    | 0.76 | 2.60 | 1.33  | -1.61 | -0.26 | -0.64 | -1.11 | 0.05  | 1.44  | -0.38 | 0.50  | 0.68  |
| Q8WUJ8 | PHD finger protein 10                                              | PHF10    | 0.76 | 1.07 | 0.51  | -0.31 | -1.26 | -1.08 | 0.92  | 0.19  | 1.57  | -1.35 | 0.85  | -0.05 |
| O75396 | Vesicle-trafficking protein SEC22b                                 | SEC22B   | 0.76 | 1.40 | -0.16 | 0.03  | -0.61 | 0.08  | -0.87 | 0.63  | -1.29 | 2.30  | -0.54 | 0.44  |
| Q92598 | Heat shock protein 105 kDa                                         | HSPH1    | 0.76 | 3.94 | -0.66 | -0.19 | 0.50  | -0.64 | -1.87 | 0.85  | 1.78  | 0.19  | -0.45 | 0.49  |
| Q9Y262 | Eukaryotic translation initiation factor 3 subunit L               | EIF3L    | 0.76 | 1.50 | 1.51  | -1.77 | -0.38 | -0.22 | -0.73 | 0.06  | 0.96  | 1.20  | 0.06  | -0.71 |
| Q9Y252 | Lambda-crystallin homolog                                          | CRYL1    | 0.75 | 1.66 | -0.34 | -1.11 | -0.18 | 0.32  | -0.41 | 0.64  | -1.70 | 1.91  | 0.56  | 0.31  |
| P41229 | Lysine-specific demethylase 5C                                     | KDM5C    | 0.75 | 2.70 | -0.51 | -0.90 | 0.51  | 0.14  | -1.55 | 2.08  | -0.52 | -0.28 | 0.59  | 0.44  |
| Q8N8N7 | Prostaglandin reductase 2                                          | PTGR2    | 0.75 | 3.24 | 0.01  | -0.19 | -0.56 | -0.35 | -1.55 | 2.18  | -0.57 | -0.08 | 1.00  | 0.09  |
| P02511 | Alpha-crystallin B chain                                           | CRYAB    | 0.75 | 2.18 | 0.19  | -0.98 | -0.19 | 0.53  | -1.57 | 1.82  | -0.74 | -0.53 | 0.72  | 0.75  |
| Q96EQ0 | Small glutamine-rich tetratricopeptide repeat-containing protein b | SGTB     | 0.75 | 0.54 | 1.19  | 0.47  | -1.11 | -0.16 | -1.08 | 1.06  | 1.33  | 0.28  | -1.03 | -0.94 |
| P04066 | Tissue alpha-L-fucosidase                                          | FUCA1    | 0.75 | 1.62 | -0.04 | -0.33 | -0.72 | -0.33 | -0.32 | -0.40 | -0.20 | 2.80  | -0.29 | -0.18 |
| O15061 | Synemin                                                            | SYNM     | 0.75 | 0.56 | 1.31  | 0.06  | -1.38 | 0.16  | -0.87 | 1.61  | -0.75 | -0.92 | 0.01  | 0.76  |
| Q9UJC5 | SH3 domain-binding glutamic acid-rich-like protein 2               | SHBBGRL2 | 0.75 | 2.43 | -0.27 | -1.01 | -0.16 | 0.09  | -0.90 | -0.80 | -0.10 | 0.06  | 0.64  | 2.45  |
| P32929 | Cystathionine gamma-lyase                                          | CTH      | 0.75 | 1.44 | -0.09 | -0.43 | -0.51 | -0.24 | -0.31 | -0.28 | -0.45 | 2.82  | -0.29 | -0.21 |
| P68104 | Elongation factor 1-alpha 1                                        | EEF1A1   | 0.75 | 2.73 | -1.02 | -0.17 | -1.67 | 0.46  | 0.08  | 1.30  | -0.47 | -0.58 | 0.53  | 1.55  |
| Q99733 | Nucleosome assembly protein 1-like 4                               | NAP1L4   | 0.75 | 4.03 | -0.85 | 0.48  | -0.62 | -0.33 | -1.59 | 0.60  | 1.60  | -0.66 | 0.08  | 1.28  |
| P11766 | Alcohol dehydrogenase class-3                                      | ADH5     | 0.75 | 3.17 | -1.05 | -1.39 | 0.74  | 0.22  | -1.05 | 0.14  | -0.59 | 1.78  | 0.54  | 0.68  |
| P45984 | Mitogen-activated protein kinase 9                                 | MAPK9    | 0.75 | 1.55 | 1.34  | 0.14  | -0.60 | -0.27 | -2.26 | 1.11  | 0.62  | -0.18 | 0.02  | 0.08  |
| Q72312 | VPS35 endosomal protein sorting factor-like                        | VPS35L   | 0.74 | 0.88 | 0.71  | -0.11 | -1.57 | 0.24  | -0.31 | 1.07  | 0.79  | -1.79 | 0.02  | 0.95  |
| O00214 | Galectin-8                                                         | LGAL8    | 0.74 | 3.33 | -0.87 | -0.66 | -0.73 | 0.24  | -0.72 | -0.78 | -0.12 | 2.24  | 0.88  | 0.53  |
| Q15102 | Platelet-activating factor acetylhydrolase 1B subunit gamma        | PAFAH1B3 | 0.74 | 1.95 | -1.74 | 0.77  | -0.39 | 0.21  | -0.72 | 0.99  | 0.59  | -1.13 | -0.01 | 1.43  |
| O94856 | Neurofascin                                                        | NFASC    | 0.74 | 1.50 | -0.39 | -1.76 | -0.37 | 0.02  | 0.95  | 0.89  | -0.16 | 1.61  | 0.31  | -1.09 |
| Q9BTZ2 | Dehydrogenase/reductase SDR family member 4                        | DHR54    | 0.74 | 0.91 | 0.66  | 0.17  | -1.33 | 0.67  | -1.23 | 1.16  | 0.57  | -1.63 | 0.40  | 0.56  |
| P25398 | 40S ribosomal protein S12                                          | RPS12    | 0.74 | 4.30 | -0.45 | -0.89 | -0.78 | -1.16 | 0.19  | 1.54  | 1.57  | 0.84  | -0.63 | -0.22 |
| P25311 | Zinc-alpha-2-glycoprotein                                          | AZGP1    | 0.74 | 1.38 | 0.00  | -0.26 | -0.46 | -0.35 | -0.47 | -0.34 | -0.27 | 2.82  | -0.40 | -0.27 |
| P49758 | Regulator of G-protein signaling 6                                 | RGSG     | 0.74 | 2.05 | -0.43 | 0.40  | -0.11 | -0.73 | -1.12 | 1.37  | 1.17  | -1.45 | -0.28 | 1.18  |
| P52888 | Thimet oligopeptidase                                              | THOP1    | 0.74 | 2.49 | 0.31  | -0.99 | 0.45  | -0.08 | -1.89 | 0.38  | 0.90  | 1.68  | -0.16 | -0.59 |
| Q9NUP9 | Protein lin-7 homolog C                                            | LIN7C    | 0.74 | 0.76 | -1.17 | 0.22  | 0.61  | 0.83  | -1.41 | 0.81  | 0.54  | -1.68 | 0.65  | 0.60  |
| P23142 | Fibulin-1                                                          | FBLN1    | 0.74 | 0.81 | -0.04 | 0.18  | -0.65 | -0.50 | 0.00  | 0.56  | -2.22 | 1.47  | 0.29  | 0.91  |
| Q15032 | R3H domain-containing protein 1                                    | R3HDM1   | 0.74 | 2.12 | 0.03  | -0.52 | -0.54 | -0.49 | -0.58 | 2.07  | -0.41 | -0.85 | -0.32 | 1.61  |
| P21964 | Catechol O-methyltransferase                                       | COMT     | 0.74 | 1.57 | -1.55 | 0.24  | -1.00 | 1.04  | -0.33 | 0.98  | 0.24  | -1.35 | 0.95  | 0.78  |
| Q92997 | Segment polarity protein dishevelled homolog DVL-3                 | DVL3     | 0.73 | 1.87 | 0.01  | -0.79 | -0.45 | -0.60 | -0.08 | 0.18  | -0.06 | 2.69  | -0.72 | -0.17 |
| P62736 | Actin, aortic smooth muscle                                        | ACTA2    | 0.73 | 0.79 | -0.55 | 1.08  | 0.29  | 0.34  | -2.12 | -0.75 | -0.41 | 0.99  | 0.08  | 1.05  |
| Q9Y6R7 | IgGfC-binding protein                                              | FCGBP    | 0.73 | 2.01 | 0.93  | 0.32  | -1.44 | -0.24 | -1.48 | 0.80  | 0.66  | -0.93 | 0.06  | 1.33  |
| Q03519 | Antigen peptide transporter 2                                      | TAP2     | 0.73 | 1.13 | -0.32 | -0.44 | -0.69 | 0.83  | -0.67 | 1.04  | -0.54 | -0.92 | -0.45 | 2.16  |
| Q9BZG1 | Ras-related protein Rab-34                                         | RAB34    | 0.73 | 1.85 | -0.86 | -0.35 | -0.54 | -0.02 | -0.13 | 0.87  | -1.15 | 0.04  | -0.24 | 2.38  |
| Q8NFH3 | Nucleoporin Nup43                                                  | NUP43    | 0.73 | 1.33 | -0.14 | -0.69 | -1.10 | 0.72  | -0.24 | 1.04  | -0.76 | -1.35 | 1.08  | 1.44  |
| Q13480 | GRB2-associated-binding protein 1                                  | GAB1     | 0.73 | 1.46 | -0.02 | -1.31 | -0.01 | 0.37  | -0.59 | 0.97  | -1.15 | -0.94 | 1.54  | 1.14  |
| O14562 | Ubiquitin domain-containing protein UBFD1                          | UBFD1    | 0.73 | 1.91 | -1.46 | -1.02 | 0.02  | 0.03  | 0.57  | -0.77 | 1.64  | 1.35  | 0.24  | -0.59 |
| P13639 | Elongation factor 2                                                | EEF2     | 0.73 | 2.50 | 0.31  | -0.46 | -0.34 | 0.29  | -2.01 | 1.57  | 1.13  | -0.79 | -0.01 | 0.30  |
| Q6ZM13 | Gliomedin                                                          | GLDN     | 0.72 | 1.13 | -0.66 | -0.50 | -0.21 | 0.32  | -0.27 | -2.16 | 1.07  | 0.85  | 0.37  | 1.20  |
| P13591 | Neural cell adhesion molecule 1                                    | NCAM1    | 0.72 | 2.73 | -0.48 | 0.20  | -0.47 | 0.23  | -1.81 | 1.36  | 0.24  | 1.31  | 0.54  | -1.13 |
| P30046 | D-dopachrome decarboxylase                                         | DDT      | 0.72 | 1.01 | 0.08  | -0.75 | 0.28  | -0.38 | -0.42 | -0.19 | -1.61 | 2.25  | 0.20  | 0.54  |
| Q658Y4 | Protein FAM91A1                                                    | FAM91A1  | 0.72 | 0.91 | -1.36 | 0.48  | 0.87  | -1.42 | 0.37  | 0.74  | -1.51 | 0.79  | 0.57  | 0.48  |
| P30520 | Adenylosuccinate synthetase isozyme 2                              | ADSS     | 0.72 | 0.87 | 1.29  | -0.17 | -1.13 | -0.52 | -0.51 | 1.37  | 1.28  | 0.31  | -0.80 | -1.12 |
| O75832 | 26S proteasome non-ATPase regulatory subunit 10                    | PSMD10   | 0.72 | 1.43 | 0.33  | -0.23 | -0.27 | 0.48  | -1.82 | 1.64  | -0.80 | -0.78 | 0.40  | 1.06  |
| Q9UN36 | Protein NDRG2                                                      | NDRG2    | 0.72 | 1.20 | -1.12 | -0.68 | -0.05 | 0.31  | 0.19  | 0.22  | -1.01 | 2.42  | 0.16  | -0.43 |
| Q07812 | Apoptosis regulator BAX                                            | BAX      | 0.72 | 0.84 | 1.13  | 0.11  | -1.03 | -0.27 | -0.95 | 1.37  | 1.51  | -1.00 | -0.67 | -0.22 |
| Q9Y4B5 | Microtubule cross-linking factor 1                                 | MTCL1    | 0.72 | 0.74 | 1.64  | -0.90 | -1.02 | -0.21 | -0.41 | 1.12  | 1.27  | -0.27 | -0.09 | -1.14 |
| P16401 | 26S proteasome non-ATPase regulatory subunit 5                     | PSMD5    | 0.72 | 0.78 | 0.57  | 0.31  | -1.81 | 0.70  | -0.71 | 1.23  | -1.07 | -0.72 | 0.66  | 0.84  |
| Q01826 | DNA-binding protein SATB1                                          | SATB1    | 0.72 | 0.87 | 0.14  | -0.64 | -0.86 | 0.97  | -0.65 | -0.65 | 0.77  | -0.66 | -0.58 | 2.16  |
| O75815 | Breast cancer anti-estrogen resistance protein 3                   | BCAR3    | 0.72 | 0.83 | 0.65  | 0.62  | -1.28 | 0.25  | -1.23 | 0.99  | 1.27  | -1.53 | 0.20  | 0.07  |
| P01009 | Alpha-1-antitrypsin                                                | SERPINA1 | 0.72 | 1.24 | -0.49 | -0.49 | 0.77  | -1.23 | 0.07  | -0.27 | -0.07 | 2.23  | -1.04 | 0.52  |
| Q9Y5X1 | Sorting nexin-9                                                    | SNX9     | 0.72 | 0.53 | 1.06  | 0.45  | -1.54 | -0.35 | -0.31 | 1.30  | 0.81  | -1.63 | -0.10 | 0.31  |
| Q13576 | Ras GTPase-activating-like protein IQGAP2                          | IQGAP2   | 0.72 | 0.67 | 1.14  | -0.98 | 1.01  | -0.97 | -1.04 | 1.39  | 0.33  | -1.21 | -0.12 | 0.45  |
| Q13129 | Zinc finger protein RIF                                            | RIF      | 0.72 | 1.45 | -0.17 | -0.29 | -0.49 | -0.24 | -0.43 | -0.36 | -0.28 | 2.83  | -0.28 | -0.31 |
| O00622 | CCN family member 1                                                | CCN1     | 0.71 | 1.48 | -0.05 | -0.36 | -0.63 | -0.29 | -0.30 | -0.21 | -0.35 | 2.82  | -0.25 | -0.38 |
| Q9UM19 | Hippocalcin-like protein 4                                         | HPCAL4   | 0.71 | 0.61 | 1.43  | -0.87 | 0.39  | -0.80 | -0.91 | 1.27  | 0.94  | -1.02 | -0.89 | 0.49  |
| Q9HCD6 | Protein TANC2                                                      | TANC2    | 0.71 | 1.62 | -0.86 | -0.01 | -0.67 | 0.74  | -0.88 | -0.32 | -1.39 | 1.79  | 0.71  | 0.88  |
| Q8IY95 | Transmembrane protein 192                                          | TMEM192  | 0.71 | 0.80 | -0.72 | 1.15  | -1.01 | 0.45  | -0.84 | 1.08  | 1.35  | -1.17 | 0.50  | -0.80 |
| O43143 | Pre-mRNA-splicing factor ATP-dependent RNA helicase DHX15          | DHX15    | 0.71 | 3.54 | 0.02  | -2.35 | -0.70 | -0.16 | 0.41  | 0.12  | -0.08 | 0.64  | 0.79  | 1.31  |
| P16070 | CD44 antigen                                                       | CD44     | 0.71 | 0.70 | -1.34 | -0.41 | 1.13  | 0.25  | 0.51  | -0.12 | -0.69 | 1.76  | 0.06  | -0.14 |
| Q9BRS8 | La-related protein 6                                               | LARP6    | 0.71 | 3.42 | 0.69  | -0.94 | -0.68 | 0.33  | -2.23 | 0.52  | 0.38  | 1.20  | 0.40  | 0.32  |
| Q9NXR8 | Inhibitor of growth protein 3                                      | ING3     | 0.71 | 0.81 | 0.65  | -0.35 | -0.56 | -0.39 | -0.35 | 2.66  | -0.36 | -0.72 | -0.31 | -0.27 |
| O15013 | Rho guanine nucleotide exchange factor 10                          | ARHGEP10 | 0.71 | 0.83 | 0.84  | -1.16 | -0.73 | -0.75 | 0.80  | 1.03  | 1.12  | -1.60 | -0.13 | 0.56  |
| A6NGB9 | WAS/WASL-interacting protein family member 3                       | WIPF3    | 0.71 | 0.89 | 0.81  | 0.80  | -2.20 | 0.33  | -0.80 | -0.71 | 1.03  | -0.18 | 0.23  | 0.68  |
| Q8NBS9 | Thioredoxin domain-containing protein 5                            | TXNDC5   | 0.71 | 0.81 | -0.79 | -0.97 | 0.35  | 1.35  | -0.92 | 1.23  | -0.98 | 0.40  | 1.15  | -0.83 |
| Q38SD2 | Leucine-rich repeat serine/threonine-protein kinase 1              | LRRK1    | 0.71 | 0.77 | 0.96  | -0.59 | -0.84 | 0.13  | -0.60 | 2.28  | -0.66 | 0.52  | -0.59 | -0.61 |

|        |                                                                      |          |      |      |       |       |       |       |       |       |       |       |       |       |
|--------|----------------------------------------------------------------------|----------|------|------|-------|-------|-------|-------|-------|-------|-------|-------|-------|-------|
| P98095 | Fibulin-2                                                            | FBLN2    | 0.71 | 1.20 | -0.16 | -0.35 | -0.39 | -0.17 | -0.31 | -0.14 | -0.29 | -0.64 | -0.36 | 2.82  |
| P08123 | Collagen alpha-2(I) chain                                            | COL1A2   | 0.70 | 0.80 | 0.13  | 0.10  | 1.18  | -0.12 | -2.26 | 0.20  | 0.82  | -0.85 | -0.22 | 1.01  |
| P14868 | Aspartate--tRNA ligase, cytoplasmic                                  | DARS     | 0.70 | 2.41 | -0.04 | -1.61 | -0.22 | -0.15 | -0.18 | 2.19  | 0.12  | -0.83 | -0.17 | 0.88  |
| P00352 | Retinal dehydrogenase 1                                              | ALDH1A1  | 0.70 | 1.05 | 0.07  | -2.67 | 0.15  | 0.00  | 1.21  | 0.29  | -0.01 | 0.30  | 0.22  | 0.43  |
| P61970 | Nuclear transport factor 2                                           | NUTF2    | 0.70 | 1.40 | -1.18 | -0.17 | -0.12 | 0.47  | -0.52 | -0.94 | -0.71 | 2.24  | 0.81  | 0.12  |
| Q3LXA3 | Triokinase/FMN cyclase                                               | TKFC     | 0.70 | 2.38 | -0.07 | -1.82 | -0.06 | -0.01 | -0.18 | 1.83  | -1.07 | 0.94  | 0.49  | -0.04 |
| Q96VQ1 | Glucocorticoid-induced transcript 1 protein                          | GLCC11   | 0.70 | 0.61 | -0.33 | 0.90  | -0.50 | -0.45 | -0.40 | -0.48 | -0.46 | 2.58  | -0.47 | -0.39 |
| P78563 | Double-stranded RNA-specific editase 1                               | ADARB1   | 0.70 | 2.18 | 0.60  | -1.50 | 0.93  | -0.88 | -1.18 | 0.26  | 0.85  | 1.12  | -0.90 | 0.70  |
| Q14644 | Ras GTPase-activating protein 3                                      | RASA3    | 0.70 | 0.89 | 0.30  | 0.22  | -1.45 | 0.17  | -0.31 | 0.74  | 0.10  | -1.94 | 1.08  | 1.08  |
| Q9Y4X5 | E3 ubiquitin-protein ligase ARIH1                                    | ARIH1    | 0.70 | 1.86 | -0.26 | -1.56 | -1.38 | 0.09  | 1.28  | 0.14  | -0.21 | 1.68  | 0.25  | -0.02 |
| O75643 | U5 small nuclear ribonucleoprotein 200 kDa helicase                  | SNRNP200 | 0.70 | 2.65 | -1.14 | -0.55 | 0.87  | 0.13  | -1.59 | -0.05 | -0.65 | 0.72  | 0.61  | 1.66  |
| Q13404 | Ubiquitin-conjugating enzyme E2 variant 1                            | UBE2V1   | 0.70 | 2.91 | 0.78  | -0.33 | 0.01  | -0.58 | -2.42 | 0.59  | 0.34  | 1.19  | -0.07 | 0.48  |
| Q9BQG0 | Myb-binding protein 1A                                               | MYBBP1A  | 0.70 | 0.88 | 1.35  | -0.69 | 0.74  | -2.14 | -0.33 | 0.41  | 0.51  | 0.43  | -0.78 | 0.48  |
| P35268 | 60S ribosomal protein L22                                            | RPL22    | 0.70 | 6.09 | -1.39 | -0.50 | -1.18 | 0.32  | -0.76 | -0.40 | 0.75  | 0.47  | 1.03  | 1.66  |
| Q6ZRS2 | Helicase SRCAP                                                       | SRCAP    | 0.69 | 0.78 | 1.43  | -0.52 | -0.71 | -0.59 | -0.54 | 1.10  | 1.75  | -0.82 | -0.50 | -0.58 |
| P62906 | 60S ribosomal protein L10a                                           | RPL10A   | 0.69 | 2.18 | -0.93 | -1.50 | -0.80 | 0.50  | 0.71  | -0.49 | 1.37  | 1.43  | 0.24  | -0.53 |
| P98170 | E3 ubiquitin-protein ligase XIAP                                     | XIAP     | 0.69 | 0.72 | 1.07  | 0.27  | -1.44 | -0.48 | -0.32 | 0.95  | -0.28 | -1.44 | 0.14  | 1.51  |
| Q9NTZ6 | RNA-binding protein 12                                               | RBM12    | 0.69 | 0.94 | 1.65  | 0.40  | -1.83 | -0.53 | -0.81 | 0.89  | 0.76  | 0.29  | -0.36 | -0.48 |
| P16435 | NADPH--cytochrome P450 reductase                                     | POR      | 0.69 | 1.70 | -0.35 | 0.62  | -0.56 | -0.18 | -1.28 | 1.93  | 0.36  | -0.87 | -0.81 | 1.12  |
| P30101 | Protein disulfide-isomerase A3                                       | PDIA3    | 0.69 | 1.81 | -1.24 | 0.44  | 0.40  | -0.26 | -1.13 | 1.33  | 0.64  | -1.50 | 0.18  | 1.15  |
| P12814 | Alpha-actinin-1                                                      | ACTN1    | 0.69 | 0.61 | -0.13 | 0.92  | -2.03 | 0.04  | 0.44  | -0.90 | 1.34  | 0.96  | -0.15 | -0.49 |
| P08246 | Neutrophil elastase                                                  | ELANE    | 0.69 | 0.82 | 0.35  | -1.18 | 0.39  | -1.04 | 0.49  | 0.91  | -1.07 | 1.32  | -1.15 | 0.98  |
| P02768 | Serum albumin                                                        | ALB      | 0.69 | 0.92 | -0.20 | -0.12 | 0.19  | -0.84 | -0.14 | 0.16  | -1.17 | 2.53  | -0.58 | 0.17  |
| P07711 | Cathepsin L1                                                         | CTSL     | 0.69 | 1.02 | -0.47 | -0.55 | -0.76 | -0.62 | 1.22  | -0.59 | -0.63 | 1.86  | -0.65 | 1.18  |
| Q53GT1 | Kelch-like protein 22                                                | KLHL22   | 0.69 | 0.78 | 0.94  | -0.13 | -2.57 | 0.60  | 0.19  | -0.01 | -0.32 | 0.86  | 0.48  | -0.04 |
| Q9Y4C2 | TRPM8 channel-associated factor 1                                    | TCAF1    | 0.69 | 0.99 | 0.65  | 0.73  | -1.78 | -0.54 | -0.20 | -0.17 | 1.89  | 0.54  | -0.62 | -0.50 |
| Q9H0U4 | Ras-related protein Rab-1B                                           | RAB1B    | 0.69 | 4.75 | -1.00 | -0.31 | -1.33 | -0.62 | 0.04  | 1.13  | 1.36  | 0.55  | -0.97 | 1.17  |
| O95163 | Blongator complex protein 1                                          | ELP1     | 0.69 | 0.86 | -0.40 | -0.08 | -0.96 | 1.27  | -0.86 | -0.93 | -0.84 | -0.04 | 1.37  | 1.46  |
| P62280 | 40S ribosomal protein S11                                            | RPS11    | 0.68 | 3.50 | -1.04 | -1.85 | -0.88 | 1.22  | -0.31 | 0.56  | 0.19  | 0.46  | 1.13  | 0.53  |
| P15559 | NAD(P)H dehydrogenase [quinone] 1                                    | NQO1     | 0.68 | 5.39 | -1.99 | -0.99 | 0.21  | -0.20 | -0.39 | 0.52  | 0.34  | 1.74  | 0.16  | 0.61  |
| P02649 | Apolipoprotein E                                                     | APOE     | 0.68 | 1.08 | 0.03  | 0.30  | -2.16 | -0.47 | 1.07  | -0.09 | -0.30 | 1.17  | -0.58 | 1.03  |
| P07947 | Tyrosine-protein kinase Yes                                          | YES1     | 0.68 | 0.80 | -0.99 | -0.57 | 0.31  | 0.68  | -0.40 | 1.08  | -2.11 | 0.66  | 0.75  | 0.59  |
| Q53H82 | Endoribonuclease LACTB2                                              | LACTB2   | 0.68 | 1.40 | 1.15  | -0.57 | -0.91 | -0.63 | -0.53 | 1.54  | -0.49 | 1.59  | -0.70 | -0.45 |
| Q81VF2 | Protein AHNK2                                                        | AHNK2    | 0.68 | 0.32 | 0.73  | -1.43 | 0.67  | 0.76  | -1.17 | 0.61  | -0.41 | 0.79  | 0.89  | -1.44 |
| Q14160 | Protein scribble homolog                                             | SCRIB    | 0.68 | 0.79 | 1.52  | -0.18 | -0.24 | -0.12 | -1.93 | 1.08  | 0.86  | -0.97 | -0.16 | 0.15  |
| Q6VEQ5 | WAS protein family homolog 2                                         | WASH2P   | 0.68 | 1.91 | 0.61  | 0.79  | -1.26 | -0.93 | -1.05 | 0.81  | 0.08  | 0.70  | -1.15 | 1.41  |
| Q13137 | Calcium-binding and coiled-coil domain-containing protein 2          | CALCOCO2 | 0.68 | 0.96 | 0.58  | -0.45 | -1.05 | -0.81 | 0.60  | 1.37  | 0.56  | -1.23 | -0.92 | 1.34  |
| Q86VB7 | Scavenger receptor cysteine-rich type 1 protein M130                 | CD163    | 0.68 | 0.91 | -0.46 | 1.57  | -0.81 | -0.67 | -0.70 | -0.12 | -0.73 | 1.52  | -0.75 | 1.14  |
| Q9Y316 | Protein MEMO1                                                        | MEMO1    | 0.68 | 1.32 | -0.15 | -0.31 | -0.60 | -0.21 | -0.21 | -0.21 | -0.32 | -0.62 | -0.17 | 2.81  |
| Q9Y315 | Deoxyribose-phosphate aldolase                                       | DERA     | 0.68 | 1.09 | 2.06  | -1.02 | -0.44 | -1.28 | -0.57 | -0.18 | 0.60  | 0.80  | -0.50 | 0.53  |
| Q9UMX0 | Ubiquitin-1                                                          | UBQLN1   | 0.68 | 0.94 | 0.00  | 0.62  | -1.82 | -0.01 | 0.12  | -1.72 | 1.12  | 0.30  | 0.63  | 0.77  |
| Q96AC6 | Kinesin-like protein KIFC2                                           | KIFC2    | 0.68 | 1.07 | 0.80  | -1.79 | -0.66 | 0.36  | 0.08  | -0.79 | 1.19  | 1.41  | 0.14  | -0.73 |
| Q12929 | Epidermal growth factor receptor kinase substrate 8                  | EPS8     | 0.68 | 0.92 | -0.31 | 0.09  | 0.72  | -0.12 | -1.46 | 1.51  | 0.54  | -1.74 | -0.03 | 0.80  |
| Q9HCU5 | Prolactin regulatory element-binding protein                         | PREB     | 0.68 | 1.01 | 0.06  | 0.19  | 0.38  | 0.25  | -2.04 | 1.70  | 0.15  | -1.22 | 0.41  | 0.12  |
| Q9UHQ9 | NADH-cytochrome b5 reductase 1                                       | CYBSR1   | 0.68 | 1.57 | -1.97 | 0.52  | 0.69  | 0.46  | -1.34 | -0.56 | -0.17 | 0.50  | 1.04  | 0.83  |
| Q9BSA4 | Protein tweety homolog 2                                             | TTYH2    | 0.67 | 0.53 | -0.31 | -1.18 | -0.50 | 0.64  | 0.67  | -1.23 | 1.24  | 1.00  | 0.91  | -1.23 |
| O00231 | 26S proteasome non-ATPase regulatory subunit 11                      | PSMD11   | 0.67 | 2.06 | 0.47  | 0.68  | -1.31 | -1.46 | -0.34 | 1.60  | 0.46  | -1.02 | 0.16  | 0.74  |
| Q15262 | Receptor-type tyrosine-protein phosphatase kappa                     | PTPRK    | 0.67 | 0.77 | -1.92 | 0.27  | 0.59  | 0.32  | -0.19 | -0.68 | -1.06 | 1.63  | 0.52  | 0.53  |
| Q15386 | Ubiquitin-protein ligase E3C                                         | UBEC3    | 0.67 | 1.56 | -1.05 | 0.17  | -0.88 | 0.24  | -0.12 | -1.41 | 0.84  | 2.07  | 0.13  | 0.01  |
| Q95147 | Dual specificity protein phosphatase 14                              | DUSP14   | 0.67 | 1.26 | -0.02 | -0.35 | -0.61 | -0.27 | -0.19 | -0.26 | -0.11 | -0.81 | -0.15 | 2.76  |
| Q9UBQ7 | Glyoxylate reductase/hydroxypyruvate reductase                       | GRHPR    | 0.67 | 2.65 | -1.34 | -1.31 | 0.22  | 0.20  | -0.06 | -0.13 | 0.00  | 2.24  | 0.52  | -0.34 |
| Q06323 | Proteasome activator complex subunit 1                               | PSME1    | 0.67 | 0.74 | 0.82  | -0.65 | -1.17 | -0.41 | 0.49  | 0.68  | -1.38 | 1.43  | 1.01  | -0.83 |
| Q709C8 | Vacuolar protein sorting-associated protein 13C                      | VPS13C   | 0.67 | 1.00 | -0.58 | -0.29 | 0.01  | 0.00  | -0.33 | -1.11 | -0.81 | 2.52  | 0.14  | 0.44  |
| Q9P120 | Zinc finger and BTB domain-containing protein 4                      | ZBTB4    | 0.67 | 0.88 | 1.31  | -0.61 | -0.88 | -0.70 | -0.16 | -0.56 | -0.69 | 1.43  | 1.52  | -0.67 |
| O75521 | Enoyl-CoA delta isomerase 2, mitochondrial                           | ECI2     | 0.67 | 1.04 | -0.81 | -0.27 | 1.23  | -0.95 | -0.39 | -1.01 | -0.89 | 1.34  | 0.33  | 1.42  |
| Q53SF7 | Cordon-bleu protein-like 1                                           | COBLL1   | 0.67 | 0.96 | -0.64 | -0.54 | -0.85 | 0.68  | 0.22  | -1.04 | -1.34 | 1.38  | 0.94  | 1.18  |
| Q9NRV9 | Heme-binding protein 1                                               | HEBP1    | 0.67 | 5.15 | -0.78 | -1.80 | -0.27 | -0.58 | 0.17  | 0.00  | 1.45  | 1.59  | -0.02 | 0.24  |
| Q9UM54 | Unconventional myosin-VI                                             | MYO6     | 0.67 | 0.92 | -0.30 | -0.31 | -0.08 | -0.07 | -0.36 | 2.72  | -0.37 | -1.07 | -0.09 | -0.06 |
| Q9UHY7 | Enolase-phosphatase E1                                               | ENOPH1   | 0.66 | 1.00 | -2.26 | 0.20  | 0.08  | 0.67  | 0.16  | -0.26 | -1.08 | 0.65  | 0.84  | 1.01  |
| P06454 | Prothymosin alpha                                                    | PTMA     | 0.66 | 0.86 | -0.17 | 0.26  | -0.56 | -0.17 | -0.42 | -0.33 | -0.33 | 2.76  | -0.61 | -0.44 |
| Q9Y6P5 | Sestrin-1                                                            | SESN1    | 0.66 | 0.80 | 1.19  | -0.84 | -1.31 | -0.15 | 0.16  | 1.61  | 0.48  | -1.39 | -0.27 | 0.53  |
| P18077 | 60S ribosomal protein L35a                                           | RPL35A   | 0.66 | 2.08 | 0.09  | -1.99 | -0.06 | 0.45  | -0.45 | 0.71  | 0.90  | -1.24 | 0.30  | 1.30  |
| Q9NRW7 | Vacuolar protein sorting-associated protein 45                       | VPS45    | 0.66 | 1.06 | 1.33  | -0.49 | -1.45 | 0.07  | -0.66 | 1.69  | -1.11 | -0.10 | 0.16  | 0.57  |
| Q9Y547 | Intraflagellar transport protein 25 homolog                          | HSPB11   | 0.66 | 1.16 | 0.02  | -0.15 | -0.57 | -0.30 | -0.35 | -0.30 | -0.28 | -0.60 | -0.28 | 2.80  |
| Q16720 | Plasma membrane calcium-transporting ATPase 3                        | ATP2B3   | 0.66 | 1.52 | -1.71 | 0.95  | 0.31  | -0.49 | -0.65 | 0.26  | 0.83  | -0.83 | -0.38 | 1.69  |
| P46734 | Dual specificity mitogen-activated protein kinase kinase 3           | MAP2K3   | 0.66 | 0.51 | 1.50  | -0.20 | -1.18 | 0.31  | -1.09 | 1.45  | -0.28 | -1.25 | 0.35  | 0.40  |
| Q8WUY8 | N-acetyltransferase 14                                               | NAT14    | 0.66 | 2.16 | -0.23 | 0.33  | -2.10 | 0.57  | -0.58 | 1.33  | -0.37 | -0.56 | 0.44  | 1.16  |
| Q13114 | TNF receptor-associated factor 3                                     | TRAF3    | 0.66 | 0.52 | 1.53  | -0.16 | -1.13 | -0.22 | -0.69 | 1.38  | 1.22  | -0.60 | -0.37 | -0.96 |
| P17858 | ATP-dependent 6-phosphofructokinase, liver type                      | PFKL     | 0.66 | 4.04 | -1.31 | -1.14 | -0.05 | 0.86  | -1.30 | 0.43  | 1.57  | 0.28  | 0.88  | -0.23 |
| Q81U25 | 5-phosphohydroxy-L-lysine phospho-lyase                              | PHYKPL   | 0.66 | 0.74 | -0.80 | -0.86 | -0.97 | 0.61  | 1.12  | 0.44  | 0.26  | 1.85  | -0.86 | -0.79 |
| Q6ICL3 | Transport and Golgi organization protein 2 homolog                   | TANGO2   | 0.66 | 1.33 | 0.73  | -0.68 | -0.81 | 0.02  | -0.71 | -0.65 | -0.72 | 2.37  | -0.10 | 0.55  |
| P34932 | Heat shock 70 kDa protein 4                                          | HSPA4    | 0.66 | 3.93 | -0.85 | 0.26  | -0.32 | -0.45 | -1.53 | -0.10 | 0.43  | 2.27  | 0.46  | -0.16 |
| Q9NZL9 | Methionine adenosyltransferase 2 subunit beta                        | MAT2B    | 0.65 | 1.22 | 0.06  | -0.57 | -0.07 | 0.08  | -0.89 | 0.12  | -1.15 | 2.55  | -0.16 | 0.03  |
| P05091 | Aldehyde dehydrogenase, mitochondrial                                | ALDH2    | 0.65 | 0.88 | -1.60 | -0.21 | 1.34  | -0.19 | -0.37 | 0.74  | -1.51 | 0.95  | 0.00  | 0.84  |
| O00743 | Serine/threonine-protein phosphatase 6 catalytic subunit             | PPP6C    | 0.65 | 1.05 | 0.38  | -1.06 | -0.48 | 0.36  | -0.41 | 1.61  | 0.72  | -1.94 | 0.33  | 0.49  |
| O75936 | Gamma-butyrobetaine dioxygenase                                      | BBOX1    | 0.65 | 1.59 | -2.26 | -0.08 | 1.12  | 0.23  | -0.66 | 0.97  | -0.15 | -0.45 | 0.37  | 0.91  |
| Q16891 | MICOS complex subunit MIC60                                          | IMMT     | 0.65 | 1.14 | 1.97  | -0.87 | -0.88 | -0.72 | -0.79 | 0.28  | -0.83 | 1.20  | 0.17  | 0.47  |
| Q9Y2T2 | AP-3 complex subunit mu-1                                            | AP3M1    | 0.65 | 1.21 | -0.36 | 0.36  | -2.38 | 0.83  | 0.20  | 0.59  | -0.08 | -0.79 | 0.61  | 1.01  |
| Q9UBX1 | Cathepsin F                                                          | CTSF     | 0.65 | 0.50 | -0.33 | -0.39 | -0.52 | -0.42 | 1.00  | -0.42 | 2.53  | -0.65 | -0.42 | -0.39 |
| Q8WUY3 | Protein prune homolog 2                                              | PRUNE2   | 0.65 | 0.78 | 0.15  | 0.90  | -2.60 | 0.72  | -0.13 | 0.00  | -0.13 | -0.14 | 0.46  | 0.79  |
| O60262 | Guanine nucleotide-binding protein G(I)/G(S)/G(O) subunit gamma GNG7 | GNG7     | 0.65 | 1.18 | -0.30 | -0.39 | -0.84 | -0.56 | 0.77  | 2.23  | -0.39 | -1.01 | -0.40 | 0.90  |
| Q6XQN6 | Nicotinate phosphoribosyltransferase                                 | NAPRT    | 0.65 | 2.42 | -0.17 | -0.88 | -0.36 | 0.59  | -1.36 | 1.41  | 0.55  | 0.98  | -1.46 | 0.70  |
| Q13627 | Dual specificity tyrosine-phosphorylation-regulated kinase 1A        | DYRK1A   | 0.65 | 0.77 | 1.43  | -1.18 | -1.85 | -0.12 | 0.77  | 0.89  | -0.26 | -0.53 | 0.26  | 0.59  |



|         |                                                               |          |      |      |       |       |       |       |       |       |       |       |       |       |
|---------|---------------------------------------------------------------|----------|------|------|-------|-------|-------|-------|-------|-------|-------|-------|-------|-------|
| Q8N5X7  | Eukaryotic translation initiation factor 4E type 3            | EIF4E3   | 0.65 | 1.00 | -0.06 | -0.14 | -0.47 | -0.24 | -0.28 | 2.80  | -0.29 | -0.74 | -0.28 | -0.29 |
| Q9BYM8  | RanBP-type and C3HC4-type zinc finger-containing protein 1    | RBCK1    | 0.65 | 0.80 | 0.59  | 0.57  | -1.22 | 0.17  | -1.08 | 1.44  | -0.61 | -1.39 | 0.96  | 0.58  |
| P11216  | Glycogen phosphorylase, brain form                            | PYG8     | 0.65 | 3.96 | -0.87 | -0.31 | 0.03  | -0.27 | -1.51 | 1.15  | -0.44 | 2.07  | -0.02 | 0.19  |
| Q92784  | Zinc finger protein DPF3                                      | DPF3     | 0.64 | 1.18 | -0.12 | -0.26 | -0.40 | -0.19 | -0.40 | -0.25 | 2.80  | -0.73 | -0.36 | -0.08 |
| P52895  | Aldo-keto reductase family 1 member C2                        | AKR1C2   | 0.64 | 0.87 | 0.69  | 0.62  | -0.01 | 0.32  | -2.68 | 0.46  | -0.21 | 0.15  | -0.10 | 0.76  |
| P32969  | 60S ribosomal protein L9                                      | RPL9     | 0.64 | 5.35 | -0.43 | -1.40 | 0.18  | 0.06  | -1.78 | -0.13 | 1.21  | 0.29  | 0.79  | 1.21  |
| Q9U115  | Transgelin-3                                                  | TAGLN3   | 0.64 | 1.09 | -0.76 | 0.23  | -0.86 | -0.46 | 0.61  | -1.67 | 1.57  | 1.19  | -0.32 | 0.47  |
| O14818  | Proteasome subunit alpha type-7                               | PSMA7    | 0.64 | 1.69 | -0.86 | -1.69 | -0.56 | 0.12  | 1.29  | -0.13 | -0.55 | 1.69  | 0.40  | 0.30  |
| G6UN15  | Pre-mRNA 3'-end-processing factor FIP1                        | FIP1L1   | 0.64 | 0.55 | 0.17  | -0.02 | -0.84 | -0.78 | 0.77  | -0.78 | 1.96  | 1.14  | -0.83 | -0.78 |
| Q12849  | G-rich sequence factor 1                                      | GRSF1    | 0.64 | 0.99 | 1.06  | -0.28 | -1.29 | 0.53  | -1.16 | 0.52  | 0.03  | -1.46 | 1.11  | 0.94  |
| Q04446  | 1,4-alpha-glucan-branching enzyme                             | GBE1     | 0.64 | 1.54 | -0.22 | -0.08 | -1.58 | 0.33  | -0.06 | 0.40  | -1.76 | 1.11  | 0.66  | 1.19  |
| Q9H165  | B-cell lymphoma/leukemia 11A                                  | BCL11A   | 0.64 | 1.05 | 1.09  | -0.63 | -0.75 | -0.40 | -0.51 | -0.54 | -0.58 | 0.41  | 2.33  | -0.42 |
| Q9HC35  | Echinoderm microtubule-associated protein-like 4              | EBL4     | 0.64 | 1.33 | -0.06 | -0.26 | -0.54 | -0.31 | -0.34 | -0.21 | -0.10 | -0.70 | -0.28 | 2.79  |
| Q9UBR2  | Cathepsin Z                                                   | CTSZ     | 0.64 | 0.83 | -0.45 | 1.29  | -0.76 | -0.46 | -0.62 | -0.60 | -0.61 | 2.04  | -0.65 | 0.82  |
| Q5VZL5  | Zinc finger MYM-type protein 4                                | ZMYM4    | 0.64 | 0.75 | 0.43  | -0.04 | -1.14 | -0.69 | 0.52  | 0.40  | 2.29  | -0.17 | -0.94 | -0.66 |
| Q7L112  | Synaptic vesicle glycoprotein 2B                              | SV2B     | 0.64 | 1.23 | 0.44  | 0.95  | -2.03 | -0.28 | -0.43 | 0.17  | 0.72  | 1.43  | 0.00  | -0.97 |
| Q04828  | Aldo-keto reductase family 1 member C1                        | AKR1C1   | 0.64 | 1.55 | -0.29 | -0.94 | -0.86 | 0.62  | -0.15 | 1.67  | -1.36 | -0.52 | 0.57  | 1.27  |
| P27361  | Mitogen-activated protein kinase 3                            | MAPK3    | 0.64 | 1.60 | -0.57 | 0.91  | -0.31 | -0.04 | -1.63 | 0.75  | 1.60  | -1.32 | 0.10  | 0.51  |
| P20023  | Complement receptor type 2                                    | CR2      | 0.63 | 0.74 | 0.48  | -0.59 | 0.59  | -0.68 | -0.72 | 2.06  | -0.67 | -0.89 | 1.08  | -0.67 |
| P26447  | Protein S100-A4                                               | S100A4   | 0.63 | 1.05 | -0.26 | -0.46 | -0.70 | -0.41 | 0.61  | -0.31 | -0.40 | 2.67  | -0.30 | -0.44 |
| O76021  | Ribosomal L1 domain-containing protein 1                      | RS1D1    | 0.63 | 0.75 | 1.06  | -1.83 | -1.20 | 0.01  | 1.04  | 1.21  | -0.57 | 0.43  | -0.17 | 0.03  |
| Q9Y420  | U6 snRNA-associated Sm-like protein LSM4                      | LSM4     | 0.63 | 0.74 | -0.62 | 0.76  | 0.54  | -0.73 | -0.86 | -0.69 | -0.78 | 1.69  | -0.72 | 1.41  |
| O75146  | Huntingtin-interacting protein 1-related protein              | HIP1R    | 0.63 | 2.16 | 0.53  | -0.21 | -0.62 | 0.19  | -1.90 | -0.03 | -0.98 | 1.64  | 0.80  | 0.59  |
| Q5VTR2  | E3 ubiquitin-protein ligase BRE1A                             | RNF20    | 0.63 | 0.73 | -0.74 | -1.00 | -1.04 | 0.85  | 1.03  | -0.92 | -0.98 | 0.59  | 1.12  | 1.09  |
| O43293  | Death-associated protein kinase 3                             | DAPK3    | 0.63 | 1.14 | 1.57  | -0.73 | -0.84 | -0.61 | -0.66 | 1.06  | 0.64  | -0.99 | -0.67 | 1.24  |
| Q9NQA3  | WAS protein family homolog 6                                  | WASH6P   | 0.63 | 1.30 | -0.02 | -0.17 | -0.67 | -0.37 | -0.24 | 2.77  | -0.24 | -0.72 | -0.22 | -0.13 |
| P13798  | Acylamino-acid-releasing enzyme                               | APEH     | 0.63 | 1.07 | -0.54 | -0.36 | 0.46  | -0.47 | -0.33 | 0.53  | -1.51 | 2.34  | -0.05 | -0.06 |
| Q16363  | Laminin subunit alpha-4                                       | LAMA4    | 0.63 | 0.72 | -1.55 | 0.43  | 0.23  | 0.63  | -0.62 | -1.78 | 0.15  | 1.27  | 0.66  | 0.57  |
| P35080  | Profilin-2                                                    | PFN2     | 0.63 | 3.30 | 0.14  | -1.08 | -1.23 | 0.57  | -1.00 | 1.59  | 0.70  | -1.02 | 0.60  | 0.74  |
| P49754  | Vacuolar protein sorting-associated protein 41 homolog        | VPS41    | 0.63 | 0.59 | 1.80  | -0.67 | -0.84 | -0.35 | -0.69 | 1.33  | 0.98  | -0.96 | -0.01 | -0.60 |
| P30044  | Peroxisomal protein, mitochondrial                            | PRDX5    | 0.63 | 2.58 | -1.64 | -0.58 | 0.62  | -0.95 | 0.30  | 1.15  | 0.65  | -0.59 | -0.47 | 1.51  |
| P0DMV9  | Heat shock 70 kDa protein 1B                                  | HSPA1B   | 0.63 | 3.14 | -0.66 | 0.82  | 0.36  | -1.19 | -1.93 | 0.58  | 0.88  | 0.78  | -0.46 | 0.83  |
| O14576  | Cytoplasmic dynein 1 intermediate chain 1                     | DYNC1I1  | 0.63 | 1.45 | -1.21 | 0.61  | 0.19  | 0.76  | -1.89 | -0.80 | -0.24 | 1.09  | 0.74  | 0.74  |
| A6NHL2  | Tubulin alpha chain-like 3                                    | TUBAL3   | 0.63 | 0.37 | -0.84 | -0.91 | -1.09 | 1.07  | 1.27  | -0.91 | -0.91 | 0.86  | 0.89  | 0.57  |
| P07951  | Tropomyosin beta chain                                        | TPM2     | 0.63 | 0.84 | 1.09  | -0.15 | 0.81  | -1.75 | -1.02 | 0.85  | 0.63  | 0.92  | -0.48 | -0.91 |
| Q9BSJ2  | Gamma-tubulin complex component 2                             | TUBGCP2  | 0.63 | 0.75 | -0.44 | -0.77 | -0.69 | 0.59  | 0.38  | 1.15  | 1.60  | -1.79 | -0.31 | 0.28  |
| P29218  | Inositol monophosphatase 1                                    | IMPA1    | 0.63 | 0.69 | -0.82 | -0.16 | -0.53 | -0.25 | 0.89  | -0.69 | -1.01 | 2.38  | 0.16  | 0.03  |
| Q9NY33  | Dipeptidyl peptidase 3                                        | DPP3     | 0.62 | 0.59 | 0.74  | -0.44 | 0.52  | -0.53 | -1.05 | 1.42  | -0.99 | 1.57  | -0.18 | -1.06 |
| Q9NZ43  | Vesicle transport protein USE1                                | USE1     | 0.62 | 0.80 | 0.57  | 0.82  | -1.94 | 0.60  | -1.01 | 0.03  | -0.92 | -0.13 | 0.89  | 1.10  |
| P29401  | Transketolase                                                 | TKT      | 0.62 | 1.10 | -1.24 | -0.94 | 0.41  | -0.61 | 1.15  | 0.65  | -0.78 | 1.88  | -0.22 | -0.30 |
| P62979  | Ubiquitin-40S ribosomal protein S27a                          | RPS27A   | 0.62 | 4.77 | -1.84 | -0.62 | 0.17  | -0.68 | -0.19 | -0.38 | 0.89  | 1.83  | 0.19  | 0.61  |
| Q8TDDQ7 | Glucosamine-6-phosphate isomerase 2                           | GNPDA2   | 0.62 | 0.56 | -0.81 | -0.25 | 0.44  | -0.09 | -0.03 | -0.90 | -0.93 | 2.45  | -0.39 | 0.51  |
| P62258  | 14-3-3 protein epsilon                                        | YWHAE    | 0.62 | 1.91 | 0.28  | 1.18  | -0.65 | -1.26 | -1.39 | 1.39  | 0.02  | 0.99  | -0.78 | 0.24  |
| P02671  | Fibrinogen alpha chain                                        | FGA      | 0.62 | 1.17 | -1.37 | -0.46 | 2.07  | -0.47 | -1.10 | 0.99  | -0.06 | 0.45  | -0.11 | 0.07  |
| Q86X95  | Corepressor interacting with RBPJ 1                           | CIR1     | 0.62 | 0.68 | 0.10  | -1.09 | -1.13 | -0.42 | 1.69  | 0.37  | -1.06 | 1.21  | -0.43 | 0.75  |
| Q9H553  | Alpha-1,3/1,6-mannosyltransferase ALG2                        | ALG2     | 0.62 | 0.76 | 0.42  | -0.19 | -0.54 | -0.73 | 0.09  | 0.40  | 1.84  | -2.03 | 0.27  | 0.47  |
| Q8N1G0  | Zinc finger protein 687                                       | ZNF687   | 0.62 | 0.70 | 0.23  | -0.45 | -0.81 | -0.35 | 0.50  | 0.54  | -1.06 | 2.38  | -0.21 | -0.76 |
| P14618  | Pyruvate kinase PKM                                           | PKM      | 0.62 | 1.59 | -0.38 | -1.40 | 1.04  | 0.06  | -0.96 | 0.10  | -0.89 | 1.87  | 0.74  | -0.18 |
| Q9UHA4  | Regulator complex protein LAMTOR3                             | LAMTOR3  | 0.62 | 1.01 | -0.37 | -0.58 | -0.91 | 1.47  | -0.76 | -0.54 | -0.60 | 1.65  | -0.52 | 1.16  |
| P62888  | 60S ribosomal protein L30                                     | RPL30    | 0.62 | 2.23 | -1.03 | -1.43 | 0.33  | 0.75  | -0.66 | -0.75 | -0.28 | 1.80  | 0.87  | 0.41  |
| O43427  | Acidic fibroblast growth factor intracellular-binding protein | FIBP     | 0.62 | 0.78 | -0.71 | -0.51 | 0.10  | 1.16  | -0.98 | -0.87 | 0.56  | -1.27 | 1.12  | 1.41  |
| O75208  | Ubiquitin biosynthesis protein COQ9, mitochondrial            | COQ9     | 0.62 | 1.34 | -0.06 | -0.42 | -0.51 | -0.28 | -0.24 | -0.12 | 2.79  | -0.74 | -0.27 | -0.15 |
| P62841  | 40S ribosomal protein S15                                     | RPS15    | 0.61 | 1.03 | 0.26  | -1.48 | 1.46  | -0.11 | -1.31 | -0.13 | 1.35  | -0.60 | -0.23 | 0.79  |
| Q7L523  | Ras-related GTP-binding protein A                             | RRAGA    | 0.61 | 1.37 | 0.25  | -0.50 | -2.34 | 0.52  | 0.60  | 0.43  | -0.74 | -0.11 | 0.90  | 0.99  |
| P25789  | Proteasome subunit alpha type-4                               | PSMA4    | 0.61 | 1.59 | -0.67 | -1.67 | 0.07  | -0.19 | 0.84  | -0.41 | -0.62 | 2.07  | 0.39  | 0.21  |
| O95865  | N(G),N(G)-dimethylarginine dimethylaminohydrolase 2           | DDAH2    | 0.61 | 1.95 | -0.61 | -1.32 | -0.26 | 0.01  | 0.85  | 0.30  | -0.91 | 2.23  | 0.12  | -0.42 |
| P10746  | Uroporphyrinogen-III synthase                                 | URO3     | 0.61 | 0.95 | -0.15 | 1.30  | -0.22 | 0.06  | -2.10 | 0.75  | 1.36  | -0.56 | -0.15 | -0.28 |
| Q9Y485  | DmX-like protein 1                                            | DMXL1    | 0.61 | 1.98 | -2.13 | 0.67  | -0.15 | 0.17  | -0.46 | -0.35 | 0.18  | 1.27  | -0.52 | 1.31  |
| Q16698  | 2,4-dienoyl-CoA reductase, mitochondrial                      | DECR1    | 0.61 | 0.50 | -1.62 | -0.02 | 0.00  | 0.46  | 0.53  | -1.73 | 0.33  | 1.61  | 0.44  | 0.00  |
| Q02108  | Guanylate cyclase soluble subunit alpha-1                     | GUCY1A1  | 0.61 | 0.90 | 0.80  | 0.65  | -1.35 | 0.59  | -1.77 | 1.15  | -0.94 | 0.15  | 0.66  | 0.05  |
| Q07955  | Serine/arginine-rich splicing factor 1                        | SRSF1    | 0.61 | 0.94 | -1.93 | 0.13  | 0.72  | -0.49 | 0.47  | -0.47 | -0.18 | 1.89  | -0.54 | 0.39  |
| O75116  | Rho-associated protein kinase 2                               | ROCK2    | 0.61 | 1.10 | 1.22  | -0.04 | -1.20 | -0.82 | -0.41 | 0.29  | 1.92  | -1.01 | -0.43 | 0.48  |
| Q8WUJ4  | General transcription factor 3C polypeptide 2                 | GTFC2    | 0.61 | 0.66 | 0.08  | -0.48 | -1.75 | 0.67  | 0.67  | -0.21 | -1.55 | 1.07  | 0.92  | 0.58  |
| P41567  | Eukaryotic translation initiation factor 1                    | EIF1     | 0.60 | 0.47 | 0.17  | -1.42 | 1.49  | -1.36 | 0.50  | 0.19  | -0.33 | 1.47  | -0.57 | -0.14 |
| P25788  | Proteasome subunit alpha type-3                               | PSMA3    | 0.60 | 1.31 | -0.81 | -1.41 | 0.16  | -0.33 | 0.99  | -0.43 | -0.67 | 2.12  | 0.09  | 0.30  |
| P17174  | Aspartate aminotransferase, cytoplasmic                       | GOT1     | 0.60 | 0.69 | -0.60 | -0.37 | 0.46  | -0.37 | 0.00  | -0.33 | -0.81 | 2.67  | -0.23 | -0.43 |
| Q9UH65  | Switch-associated protein 70                                  | SWAP70   | 0.60 | 1.46 | -2.13 | 0.52  | 0.10  | 0.88  | -0.91 | 0.38  | -0.18 | -0.41 | 0.29  | 1.47  |
| Q14677  | Clahtin interactor 1                                          | CLINT1   | 0.60 | 1.28 | -0.23 | -0.01 | -1.09 | -0.16 | 0.06  | 1.11  | 1.18  | -1.54 | -0.78 | 1.45  |
| Q5FW63  | Proline-rich transmembrane protein 3                          | PRRT3    | 0.60 | 0.94 | 0.97  | 0.92  | -1.32 | -0.96 | -0.72 | 0.99  | 1.52  | -0.64 | -0.24 | -0.54 |
| P51911  | Calponin-1                                                    | CNN1     | 0.60 | 1.11 | 1.49  | -0.42 | -1.64 | -0.58 | -0.10 | 1.12  | 0.92  | -0.89 | -0.53 | 0.62  |
| Q92597  | Protein NDRG1                                                 | NDRG1    | 0.60 | 1.00 | -1.79 | 0.08  | -0.12 | -0.89 | 1.57  | 0.06  | -0.97 | 1.01  | 0.61  | 0.44  |
| Q9C0K0  | B-cell lymphoma/leukemia 11B                                  | BCL11B   | 0.60 | 0.39 | 1.81  | -0.55 | -0.68 | -0.52 | -0.59 | 1.66  | 0.68  | -0.78 | -0.55 | -0.48 |
| Q96K94  | Cytosolic non-specific dipeptidase                            | CNDP2    | 0.60 | 2.76 | -0.83 | -0.08 | 0.64  | -0.24 | -1.82 | 0.69  | -0.85 | 1.73  | 0.46  | 0.31  |
| Q99436  | Proteasome subunit beta type-7                                | PSMB7    | 0.60 | 1.63 | -0.97 | -1.58 | 0.29  | -0.43 | 1.03  | 0.09  | -0.35 | 1.99  | -0.28 | 0.20  |
| P07900  | Heat shock protein HSP 90-alpha                               | HSP90AA1 | 0.60 | 1.91 | -0.05 | -0.41 | 0.19  | -0.39 | -1.25 | 1.46  | 1.27  | -1.39 | -0.51 | 1.06  |
| Q8NDV7  | Trinucleotide repeat-containing gene 6A protein               | TNRC6A   | 0.60 | 0.63 | 0.64  | 0.80  | -0.93 | -0.63 | -0.69 | -0.73 | -0.64 | 2.00  | -0.71 | 0.87  |
| P48643  | T-complex protein 1 subunit epsilon                           | CCT5     | 0.60 | 1.45 | 1.51  | -0.63 | -1.59 | -0.66 | -0.16 | 1.49  | 0.42  | 0.64  | -0.52 | -0.50 |
| P11586  | C-1-tetrahydrofolate synthase, cytoplasmic                    | MTFHD1   | 0.60 | 1.49 | -0.14 | 0.23  | -1.27 | 0.28  | -0.68 | 1.27  | -0.37 | -1.43 | 0.45  | 1.66  |
| Q8TCD5  | 5'(3')-deoxyribonucleotidase, cytosolic type                  | NTSC     | 0.60 | 1.08 | 0.79  | -1.89 | 0.21  | -0.01 | -0.33 | 1.26  | -1.34 | -0.16 | 0.45  | 1.02  |
| P42677  | 40S ribosomal protein S27                                     | RPS27    | 0.60 | 5.35 | -0.53 | -0.46 | -0.90 | -0.20 | -1.37 | 1.16  | 1.10  | -0.63 | 0.15  | 1.67  |
| Q9HC78  | Zinc finger and BTB domain-containing protein 20              | ZBTB20   | 0.60 | 0.53 | 0.41  | -1.17 | -2.01 | 0.82  | 1.26  | 0.61  | -0.56 | -0.16 | 0.64  | 0.16  |
| Q96NN9  | Apoptosis-inducing factor 3                                   | AIFM3    | 0.60 | 1.59 | -2.05 | -0.25 | -0.46 | 0.34  | 0.78  | -0.51 | 0.27  | -0.57 | 1.49  | 0.96  |
| P13796  | Plastin-2                                                     | LCP1     | 0.60 | 0.82 | -0.93 | 0.70  | -0.80 | -0.29 | 0.32  | -0.09 | -0.65 | 2.46  | -0.13 | -0.58 |

|        |                                                                          |          |      |      |       |       |       |       |       |       |       |       |       |       |
|--------|--------------------------------------------------------------------------|----------|------|------|-------|-------|-------|-------|-------|-------|-------|-------|-------|-------|
| Q9UGI8 | Testin                                                                   | TES      | 0.60 | 1.20 | -0.01 | -0.32 | -0.60 | -0.20 | -0.25 | -0.16 | -0.26 | -0.85 | -0.11 | 2.76  |
| Q9UPQ0 | LIM and calponin homology domains-containing protein 1                   | LIMCH1   | 0.60 | 0.67 | -2.23 | 0.83  | -0.43 | 0.72  | 0.28  | -0.91 | -0.42 | 0.71  | 0.70  | 0.75  |
| Q9NRN5 | Olfactomedin-like protein 3                                              | OLFML3   | 0.60 | 1.03 | -0.21 | 0.89  | -0.80 | -0.43 | -0.64 | 1.38  | 1.85  | -1.04 | -0.61 | -0.40 |
| Q86XL3 | Ankyrin repeat and LIM domain-containing protein 2                       | ANKLE2   | 0.60 | 0.74 | 1.86  | -0.63 | -1.02 | -0.24 | -0.88 | 1.49  | -0.50 | 0.51  | -0.73 | 0.14  |
| Q9Y3P9 | Rab GTPase-activating protein 1                                          | RABGAP1  | 0.60 | 0.48 | 0.38  | 0.06  | -1.48 | 0.09  | 0.32  | 1.15  | 1.21  | -1.93 | -0.02 | 0.22  |
| P22676 | Calretinin                                                               | CALB2    | 0.60 | 0.68 | 0.40  | -0.49 | 1.00  | -1.88 | 0.12  | 0.24  | 0.29  | 1.45  | -1.33 | 0.19  |
| Q8ND56 | Protein LSM14 homolog A                                                  | LSM14A   | 0.60 | 0.69 | 1.09  | -1.52 | -1.67 | 0.74  | 0.50  | -0.84 | -0.08 | 0.32  | 0.84  | 0.63  |
| I15021 | Microtubule-associated serine/threonine-protein kinase 4                 | MAST4    | 0.60 | 0.55 | 0.80  | 0.10  | -1.63 | 0.62  | -0.60 | 1.00  | 0.38  | -1.78 | 0.51  | 0.60  |
| P51957 | Serine/threonine-protein kinase Nek4                                     | NEK4     | 0.60 | 1.20 | -0.14 | -0.26 | -0.45 | -0.33 | -0.20 | 2.80  | -0.18 | -0.74 | -0.27 | -0.23 |
| O43488 | Aflatoxin B1 aldehyde reductase member 2                                 | AKR7A2   | 0.60 | 1.06 | -1.03 | 0.27  | -0.59 | 0.57  | -0.45 | -0.99 | -1.28 | 1.61  | 0.94  | 0.95  |
| O43314 | Inositol hexakisphosphate and diphosphoinositol-pentakisphosphat         | PPIP5K2  | 0.59 | 0.33 | 1.42  | 0.05  | -0.62 | -0.43 | -0.87 | 1.35  | 1.37  | -1.04 | -0.38 | -0.85 |
| P16615 | Sarcoplasmic/endoplasmic reticulum calcium ATPase 2                      | ATP2A2   | 0.59 | 1.53 | 0.19  | 0.07  | 0.32  | -0.21 | -1.96 | 0.61  | 1.42  | -1.21 | -0.26 | 1.03  |
| Q8TF68 | Zinc finger protein 384                                                  | ZNF384   | 0.59 | 0.78 | 0.09  | -1.11 | -1.22 | 0.84  | 0.45  | 1.13  | -1.07 | 0.62  | 1.26  | -0.99 |
| O75864 | Protein phosphatase 1 regulatory subunit 37                              | PPP1R37  | 0.59 | 0.72 | -0.02 | -0.24 | -1.57 | -0.37 | 1.32  | -1.28 | 1.49  | 0.84  | -0.09 | -0.08 |
| P24539 | ATP synthase F(0) complex subunit B1, mitochondrial                      | ATP5PB   | 0.59 | 1.07 | -0.69 | -1.08 | 0.81  | 0.78  | -1.03 | 0.77  | -1.00 | 1.37  | 0.92  | -0.84 |
| Q76N89 | E3 ubiquitin-protein ligase HECW1                                        | HECW1    | 0.59 | 0.49 | 0.49  | 0.54  | -0.92 | -0.46 | -0.28 | 1.45  | 1.14  | 0.60  | -1.68 | -0.86 |
| Q965I9 | Spermatid perinuclear RNA-binding protein                                | STRBP    | 0.59 | 0.75 | -1.33 | 0.37  | 1.02  | 0.48  | -1.46 | -1.32 | 1.15  | 0.72  | 0.04  | 0.32  |
| P07737 | Profilin-1                                                               | PFN1     | 0.59 | 3.22 | -0.68 | -0.32 | 0.72  | -0.12 | -2.20 | 1.28  | 0.29  | -0.44 | 0.56  | 0.92  |
| Q2TAA2 | Isoamyl acetate-hydrolyzing esterase 1 homolog                           | IAH1     | 0.59 | 0.57 | -1.02 | 0.25  | 0.41  | 0.72  | -1.09 | -1.11 | -1.14 | 1.57  | 0.58  | 0.82  |
| Q9P253 | Vacuolar protein sorting-associated protein 18 homolog                   | VPS18    | 0.59 | 1.67 | -0.27 | -0.62 | 0.97  | -1.20 | -0.58 | 0.04  | 2.01  | 0.41  | -1.20 | 0.44  |
| O14950 | Myosin regulatory light chain 12B                                        | MYL12B   | 0.59 | 2.23 | -2.46 | 0.51  | 0.52  | -0.22 | -0.46 | -0.33 | 0.54  | 1.11  | 0.08  | 0.70  |
| Q9NR31 | GTP-binding protein SAR1a                                                | SAR1A    | 0.59 | 2.17 | 0.23  | 0.50  | -1.99 | 0.34  | -1.10 | 0.38  | -0.96 | 1.03  | 0.94  | 0.63  |
| Q9BQA1 | Methylosome protein 50                                                   | WDR77    | 0.59 | 0.50 | 0.64  | -1.60 | 0.09  | -0.23 | 0.46  | 0.80  | -1.83 | 1.30  | 0.19  | 0.19  |
| Q9UHC6 | Contactin-associated protein-like 2                                      | CNTNAP2  | 0.59 | 1.88 | 0.03  | -1.95 | -1.41 | 1.22  | 0.21  | 0.49  | 0.02  | -0.13 | 1.13  | 0.38  |
| O15354 | Prosaposin receptor GPR37                                                | GPR37    | 0.59 | 0.66 | 0.10  | -1.29 | -1.11 | 0.52  | 0.95  | -0.88 | -0.44 | 1.52  | 1.16  | -0.54 |
| P20674 | Cytochrome c oxidase subunit 5A, mitochondrial                           | COX5A    | 0.59 | 0.37 | 1.53  | -0.46 | -0.90 | 0.09  | -0.76 | 1.04  | 1.53  | -0.94 | -0.81 | -0.32 |
| P83916 | Chromobox protein homolog 1                                              | CBX1     | 0.59 | 1.17 | 0.27  | -0.89 | -0.39 | -0.34 | 0.02  | 1.37  | 0.62  | 0.13  | -2.02 | 1.23  |
| P08865 | 40S ribosomal protein SA                                                 | RPSA     | 0.59 | 1.00 | 1.30  | -1.21 | -0.06 | -0.47 | -0.71 | 0.71  | 1.81  | 0.08  | -0.33 | -1.11 |
| O43852 | Calumenin                                                                | CALU     | 0.59 | 2.12 | -0.11 | -0.52 | -0.74 | -0.38 | -0.36 | 1.85  | 1.74  | -1.18 | -0.12 | -0.18 |
| O75940 | Survival of motor neuron-related-splicing factor 30                      | SMNDC1   | 0.58 | 1.04 | 0.11  | -0.33 | -0.49 | -0.23 | -0.29 | -0.30 | -0.30 | -0.77 | -0.18 | 2.78  |
| A7EZV4 | Zinc finger SWIM domain-containing protein 8                             | ZSWIM8   | 0.58 | 1.45 | 1.05  | -0.23 | -0.88 | -1.52 | 0.06  | 0.83  | 0.55  | 1.57  | -0.33 | -1.10 |
| P02745 | Complement C1q subcomponent subunit A                                    | C1QA     | 0.58 | 2.93 | 0.26  | -1.49 | 0.16  | -1.10 | -0.27 | 1.14  | 1.21  | -0.94 | -0.27 | 1.30  |
| Q9UBK8 | Methionine synthase reductase                                            | MTRR     | 0.58 | 0.84 | -0.44 | -0.51 | -0.79 | 1.37  | -0.64 | -0.48 | -0.46 | -0.97 | 1.43  | 1.49  |
| P48444 | Coatomer subunit delta                                                   | ARCN1    | 0.58 | 1.26 | -0.38 | 0.74  | -0.56 | 0.57  | -1.74 | -0.18 | -0.06 | -0.73 | 0.36  | 1.98  |
| Q86X76 | Deaminated glutathione amidase                                           | NIT1     | 0.58 | 2.05 | 1.34  | -0.99 | -1.62 | 0.51  | -1.24 | 1.18  | 0.40  | -0.19 | 0.43  | 0.18  |
| P49327 | Fatty acid synthase                                                      | FASN     | 0.58 | 0.90 | 1.20  | -0.30 | -1.22 | -0.57 | -0.17 | 1.06  | 1.76  | -1.08 | -0.46 | -0.21 |
| Q13428 | Treacle protein                                                          | TCOF1    | 0.58 | 2.13 | -1.10 | 0.03  | -0.16 | 0.88  | -1.64 | -0.05 | -0.88 | 0.38  | 0.98  | 1.55  |
| Q9P2W9 | Syntaxin-18                                                              | STX18    | 0.58 | 1.73 | 1.24  | 0.41  | -1.75 | 0.02  | -1.73 | 0.82  | 0.26  | 0.42  | 0.53  | -0.22 |
| Q9BVK6 | Transmembrane emp24 domain-containing protein 9                          | TMED9    | 0.58 | 0.58 | 1.36  | 0.69  | -1.02 | -0.83 | -0.94 | 1.02  | -0.94 | 1.18  | 0.28  | -0.81 |
| P62861 | 40S ribosomal protein S30                                                | FAU      | 0.58 | 2.09 | -0.27 | -1.24 | 1.28  | -1.10 | -0.64 | -0.09 | 1.68  | 0.08  | -0.64 | 0.93  |
| Q9H329 | Band 4.1-like protein 4B                                                 | EPB41L4B | 0.58 | 1.00 | -0.40 | -2.25 | -0.23 | 0.86  | 0.85  | 0.22  | -0.82 | 0.86  | 0.89  | 0.02  |
| O75676 | Ribosomal protein S6 kinase alpha-4                                      | RPS6KA4  | 0.57 | 0.38 | 1.34  | -0.57 | -1.57 | 0.12  | 0.17  | 1.17  | 0.89  | -0.20 | 0.11  | -1.46 |
| P32121 | Beta-arrestin-2                                                          | ARRB2    | 0.57 | 2.05 | -1.43 | -1.31 | 0.46  | 0.79  | -0.45 | -0.15 | -0.88 | 0.45  | 1.20  | 1.32  |
| Q93088 | Betaine-homocysteine S-methyltransferase 1                               | BHMT     | 0.57 | 0.75 | 0.20  | 1.04  | -1.45 | 0.60  | -1.30 | 0.22  | -1.29 | 1.25  | 0.07  | 0.67  |
| Q8NIW1 | Rho guanine nucleotide exchange factor 28                                | ARHGEF28 | 0.57 | 1.47 | -0.09 | -0.37 | -0.44 | -0.30 | -0.41 | -0.04 | 2.76  | -0.85 | -0.12 | -0.13 |
| Q96DI7 | U5 small nuclear ribonucleoprotein 40 kDa protein                        | SNRNP40  | 0.57 | 0.74 | -0.02 | 0.27  | -2.43 | 1.01  | 0.26  | -0.25 | -0.59 | -0.02 | 0.90  | 0.86  |
| P60900 | Proteasome subunit alpha type-6                                          | PSMA6    | 0.57 | 1.18 | -0.64 | -2.13 | 0.21  | -0.03 | 1.27  | -0.07 | -0.25 | 1.45  | 0.43  | -0.24 |
| P51692 | Signal transducer and activator of transcription 5B                      | STAT5B   | 0.57 | 1.43 | 0.16  | -1.28 | -2.26 | 0.83  | 0.96  | 0.48  | 0.20  | 0.40  | 0.45  | 0.05  |
| Q13838 | Spliceosome RNA helicase DDX39B                                          | DDX39B   | 0.57 | 1.50 | 1.07  | -0.41 | -1.30 | 0.28  | -1.19 | 1.20  | 0.77  | -1.40 | 0.57  | 0.42  |
| P05413 | Fatty acid-binding protein, heart                                        | FABP3    | 0.57 | 0.85 | -0.40 | 0.46  | -0.75 | -0.80 | 0.46  | -0.22 | -0.70 | 2.53  | -0.53 | -0.06 |
| P26599 | Polypyrimidine tract-binding protein 1                                   | PTBP1    | 0.57 | 1.04 | -1.34 | -0.86 | 0.32  | 0.78  | -0.08 | 0.08  | -1.73 | 1.02  | 1.08  | 0.74  |
| Z29728 | 2'-5'-oligoadenylate synthase 2                                          | OAS2     | 0.57 | 0.87 | -0.31 | 1.21  | -0.80 | -0.44 | -0.69 | -0.43 | -0.55 | -0.89 | 0.87  | 2.03  |
| P54577 | Tyrosine-tRNA ligase, cytoplasmic                                        | YARS     | 0.57 | 1.61 | 0.37  | -0.43 | -1.13 | -0.51 | 0.01  | 1.58  | 1.61  | -1.24 | -0.64 | 0.37  |
| P37235 | Hippocalcin-like protein 1                                               | HPCAL1   | 0.57 | 1.05 | -0.46 | -0.62 | -0.89 | -0.52 | 1.28  | -0.64 | -0.66 | 1.74  | 1.26  | -0.50 |
| P05090 | Apolipoprotein D                                                         | APOD     | 0.57 | 1.19 | 0.57  | -0.32 | -1.97 | -0.45 | 0.85  | 0.59  | -0.83 | 1.50  | -0.47 | 0.53  |
| P50542 | Peroxisomal targeting signal 1 receptor                                  | PEX5     | 0.57 | 1.45 | 0.75  | -2.43 | 0.38  | 0.02  | -0.27 | 1.18  | -0.63 | 0.70  | 0.21  | 0.09  |
| P62987 | Ubiquitin-60S ribosomal protein L40                                      | UBA52    | 0.57 | 1.55 | 0.10  | -2.36 | 1.05  | -0.05 | -0.36 | -0.65 | 0.32  | 0.16  | 0.86  | 0.94  |
| P52292 | Importin subunit alpha-1                                                 | KPNA2    | 0.57 | 0.82 | -0.70 | 0.75  | -2.52 | 0.47  | 0.99  | 0.12  | 0.39  | 0.38  | 0.23  | -0.11 |
| P50440 | Glycine amidinotransferase, mitochondrial                                | GATM     | 0.57 | 0.66 | -0.51 | -0.98 | 0.27  | -0.40 | 0.79  | -0.58 | -0.96 | 2.33  | 0.36  | -0.31 |
| Q9NVX7 | Kelch repeat and BTB domain-containing protein 4                         | KBTBD4   | 0.57 | 0.68 | -0.85 | -0.99 | 0.96  | 1.04  | -1.00 | -0.88 | -0.87 | 0.36  | 0.85  | 1.39  |
| Q69YQ0 | Cytospin-A                                                               | SPECC1L  | 0.56 | 0.83 | -0.46 | 1.71  | -0.89 | -0.71 | -0.64 | 0.79  | -0.69 | -1.02 | 0.66  | 1.26  |
| P48729 | Casein kinase I isoform alpha                                            | CSNK1A1  | 0.56 | 0.89 | 1.13  | -1.63 | -0.89 | 0.72  | -0.37 | 0.84  | -0.26 | -1.20 | 0.71  | 0.95  |
| O14795 | Protein unc-13 homolog B                                                 | UNC13B   | 0.56 | 0.91 | -0.32 | -0.42 | -0.84 | 0.99  | -0.48 | -0.58 | -0.45 | -0.90 | 0.85  | 2.17  |
| Q9UBL6 | Copine-7                                                                 | CPNE7    | 0.56 | 0.99 | -1.49 | -0.13 | 0.29  | -0.70 | 0.88  | 0.11  | -0.39 | 2.17  | -0.73 | -0.02 |
| Q8IY45 | Protein AMN1 homolog                                                     | AMN1     | 0.56 | 0.66 | -1.21 | 0.20  | 0.73  | 0.99  | -1.53 | -0.02 | -1.36 | 0.99  | 0.39  | 0.82  |
| O94832 | Unconventional myosin-Id                                                 | MYO1D    | 0.56 | 1.54 | -0.60 | 0.15  | -1.02 | 0.44  | -0.59 | 0.48  | -1.79 | 1.61  | 0.92  | 0.41  |
| P35606 | Coatomer subunit beta'                                                   | COPB2    | 0.56 | 1.31 | 1.34  | -0.96 | -0.90 | -0.21 | -0.68 | 1.68  | 1.17  | -0.58 | -0.62 | -0.23 |
| Q8NGU4 | Cohesin subunit SA-2                                                     | STA2     | 0.56 | 1.49 | 0.38  | -1.42 | -1.64 | 0.22  | 0.89  | 0.92  | 1.03  | -1.08 | 0.36  | 0.34  |
| P56556 | NADH dehydrogenase [ubiquinone] 1 alpha subcomplex subunit 6             | NDUFA6   | 0.56 | 0.62 | -0.44 | -0.54 | 1.50  | -0.65 | -0.65 | -0.59 | -0.66 | 2.12  | -0.30 | 0.20  |
| P18074 | General transcription and DNA repair factor IIH helicase subunit : ERCC2 | ERCC2    | 0.56 | 0.53 | -0.05 | 0.19  | -1.11 | 0.13  | 0.14  | -0.55 | -1.46 | 0.51  | -0.04 | 2.24  |
| O43615 | Mitochondrial import inner membrane translocase subunit TIM44            | TIM44    | 0.56 | 0.73 | -0.58 | -0.73 | 1.41  | -0.66 | -0.34 | -0.77 | 1.78  | -1.04 | 0.07  | 0.86  |
| Q86U44 | N6-adenosine-methyltransferase catalytic subunit                         | METTL3   | 0.56 | 1.02 | 1.05  | -1.38 | 0.00  | -0.91 | 0.07  | -0.66 | 2.16  | -0.11 | -0.06 | -0.16 |
| P22059 | Oxysterol-binding protein 1                                              | OSBP     | 0.56 | 2.33 | -0.88 | 0.53  | 0.69  | -0.21 | -2.31 | 0.28  | 0.87  | 0.27  | -0.29 | 1.04  |
| O95169 | NADH dehydrogenase [ubiquinone] 1 beta subcomplex subunit 8, r           | NDUFB8   | 0.56 | 1.50 | -0.79 | -0.88 | -1.25 | 0.46  | 0.90  | -0.78 | 1.60  | 0.78  | 0.76  | -0.81 |
| Q9BRA2 | Thioredoxin domain-containing protein 17                                 | TXNDC17  | 0.56 | 1.23 | -0.87 | -0.54 | -0.51 | -0.34 | 0.90  | 1.04  | -1.93 | 1.05  | 0.36  | 0.84  |
| P01011 | Alpha-1-antichymotrypsin                                                 | SERPINA3 | 0.56 | 0.77 | 0.10  | -0.80 | 1.04  | -1.76 | 0.50  | -0.18 | 0.24  | 1.53  | -1.12 | 0.47  |
| P02792 | Ferritin light chain                                                     | FTL      | 0.56 | 2.36 | -0.15 | -1.09 | -1.48 | -0.84 | 1.40  | -0.25 | 0.74  | 1.42  | -0.25 | 0.50  |
| Q86UV5 | Ubiquitin carboxyl-terminal hydrolase 48                                 | USP48    | 0.56 | 0.55 | -0.14 | -1.15 | -1.38 | 0.51  | 1.46  | -1.14 | 1.26  | 0.35  | 0.53  | -0.30 |
| P14696 | LRP chaperone MESD                                                       | MESD     | 0.56 | 0.74 | -0.92 | 0.35  | 1.90  | -1.09 | -1.15 | 0.72  | 0.99  | 0.01  | -0.18 | -0.62 |
| Q723C6 | Autophagy-related protein 9A                                             | ATG9A    | 0.55 | 3.13 | -0.20 | -0.51 | -1.65 | -0.32 | 0.12  | 0.40  | 0.74  | 1.37  | -1.26 | 1.30  |
| P08567 | Pleckstrin                                                               | PLEK     | 0.55 | 0.54 | 0.74  | 0.23  | 0.78  | -0.42 | -2.02 | 0.64  | 1.22  | -1.19 | -0.33 | 0.35  |
| O94906 | Pre-mRNA-processing factor 6                                             | PRPF6    | 0.55 | 0.75 | 0.82  | -0.53 | -1.34 | 0.28  | -0.15 | 0.43  | 1.73  | -1.60 | 0.60  | -0.23 |
| P78318 | Immunoglobulin-binding protein 1                                         | IGBP1    | 0.55 | 0.51 | 0.03  | -0.72 | 1.35  | 0.66  | -1.97 | -0.54 | -0.82 | 0.73  | 0.63  | 0.66  |

|        |                                                                 |           |      |      |       |       |       |       |       |       |       |       |       |       |
|--------|-----------------------------------------------------------------|-----------|------|------|-------|-------|-------|-------|-------|-------|-------|-------|-------|-------|
| Q9Y303 | N-acetylglucosamine-6-phosphate deacetylase                     | AMDHD2    | 0.55 | 0.90 | -0.18 | 0.61  | -0.83 | 0.77  | -1.43 | -0.40 | -1.44 | 1.04  | 1.24  | 0.63  |
| Q96T23 | Remodeling and spacing factor 1                                 | RSF1      | 0.55 | 0.49 | 1.70  | 0.07  | -2.04 | -0.39 | 0.02  | 0.83  | 0.77  | 0.05  | -0.44 | -0.57 |
| Q9UI08 | Ena/VASP-like protein                                           | EVL       | 0.55 | 0.88 | -0.17 | -0.19 | -2.40 | 1.05  | 0.64  | -0.68 | 0.18  | 0.90  | 0.61  | 0.05  |
| Q13976 | cGMP-dependent protein kinase 1                                 | PRKG1     | 0.55 | 0.71 | 0.86  | -0.39 | 1.12  | -1.23 | -1.24 | 1.35  | -1.14 | -0.11 | -0.05 | 0.81  |
| Q86XE0 | Sorting nexin-32                                                | SNX32     | 0.55 | 0.69 | 0.91  | 1.06  | -0.97 | -1.06 | -0.79 | 0.35  | 0.50  | -0.01 | -1.40 | 1.41  |
| Q15334 | Lethal(2) giant larvae protein homolog 1                        | LLGL1     | 0.55 | 1.65 | 0.07  | -2.28 | -0.22 | 0.28  | 0.47  | 1.38  | -0.94 | 0.07  | 0.57  | 0.59  |
| P05230 | Fibroblast growth factor 1                                      | FGF1      | 0.55 | 1.28 | -0.27 | -1.23 | 0.99  | 0.72  | -1.60 | 1.23  | -0.63 | -0.53 | 1.03  | 0.30  |
| Q43164 | E3 ubiquitin-protein ligase Praja-2                             | PJA2      | 0.55 | 0.70 | 0.56  | -1.33 | -1.59 | 0.62  | 0.87  | -1.20 | 0.63  | -0.08 | 1.13  | 0.38  |
| Q9Y388 | RNA-binding motif protein, X-linked 2                           | RBMX2     | 0.55 | 0.76 | 1.05  | 0.07  | -1.19 | 0.30  | -1.15 | 0.26  | 1.82  | -0.60 | 0.48  | -1.05 |
| Q9BQ67 | Glutamate-rich WD repeat-containing protein 1                   | GRW01     | 0.55 | 0.50 | -0.12 | -0.26 | -2.11 | 0.90  | 0.94  | -0.61 | -0.89 | 0.75  | 0.82  | 0.58  |
| Q9KUW7 | Calcium-dependent secretion activator 2                         | CADPS2    | 0.55 | 0.61 | -0.22 | 1.52  | -2.18 | 0.14  | -0.04 | -0.26 | 0.92  | -0.72 | 0.24  | 0.60  |
| Q9HC38 | Glyoxalase domain-containing protein 4                          | GL0D4     | 0.55 | 1.00 | -0.17 | -0.08 | -0.40 | -0.32 | -0.24 | -1.66 | 0.38  | 2.39  | 0.17  | -0.07 |
| P00568 | Adenylate kinase isoenzyme 1                                    | AK1       | 0.55 | 1.33 | 0.47  | 0.19  | -0.99 | -0.15 | -0.98 | 1.99  | -0.77 | -0.95 | 0.03  | 1.15  |
| P51809 | Vesicle-associated membrane protein 7                           | VAMP7     | 0.55 | 1.29 | -2.12 | 0.44  | -0.67 | 0.54  | 0.41  | 0.77  | -1.20 | 0.93  | 0.66  | 0.24  |
| Q9UM56 | Synaptodin-2                                                    | SYNPO2    | 0.55 | 0.75 | 0.19  | 0.97  | -1.27 | 0.37  | -1.17 | 1.27  | -0.29 | -1.34 | 0.08  | 1.19  |
| Q14999 | Cullin-7                                                        | CUL7      | 0.55 | 0.48 | 0.86  | 0.66  | -1.18 | 0.17  | -1.14 | 1.34  | 1.14  | -1.38 | -0.16 | -0.31 |
| Q43633 | Charged multivesicular body protein 2a                          | CHMP2A    | 0.55 | 0.70 | 1.41  | -1.46 | -1.67 | 0.60  | 0.25  | -0.75 | 0.09  | 0.36  | 0.96  | 0.21  |
| P51151 | Ras-related protein Rab-9A                                      | RAB9A     | 0.54 | 1.60 | 0.76  | -0.53 | -1.98 | 0.63  | -0.52 | 0.98  | -0.05 | -1.02 | 1.01  | 0.72  |
| Q9POK7 | Ankycorbin                                                      | RAI14     | 0.54 | 0.80 | -0.27 | -0.43 | 0.44  | -0.32 | -0.42 | -0.40 | -0.27 | -0.74 | -0.31 | 2.72  |
| Q96HD9 | N-acyl-aromatic-L-amino acid amidohydrolase (carboxylate-formi  | ACY3      | 0.54 | 1.34 | 0.00  | -0.34 | -0.64 | -0.17 | -0.35 | -0.35 | -0.40 | 2.80  | -0.44 | -0.11 |
| O15394 | Neural cell adhesion molecule 2                                 | NCAM2     | 0.54 | 0.52 | -1.11 | 0.53  | -0.06 | 0.69  | -0.73 | -1.12 | -1.23 | 1.55  | 1.06  | 0.42  |
| P62140 | Serine/threonine-protein phosphatase PP1-beta catalytic subunit | PPP1CB    | 0.54 | 2.21 | -0.01 | -0.72 | -1.99 | 0.33  | 0.36  | 1.09  | 0.16  | -1.09 | 0.67  | 1.20  |
| Q96IU4 | Protein ABHD14B                                                 | ABHD14B   | 0.54 | 1.29 | -1.49 | 0.25  | 0.17  | 0.62  | -0.94 | 0.15  | -1.52 | 0.34  | 1.08  | 1.34  |
| P48147 | Prolyl endopeptidase                                            | PREP      | 0.54 | 0.21 | -1.56 | 0.62  | 0.54  | 0.61  | -0.51 | -0.68 | -1.60 | 0.88  | 0.68  | 1.01  |
| P04792 | Heat shock protein beta-1                                       | HSPB1     | 0.54 | 1.09 | 0.09  | 0.25  | -0.42 | -0.22 | -0.96 | 1.64  | -0.09 | -1.59 | -0.27 | 1.57  |
| Q81Y16 | Exocyst complex component 8                                     | EXOC8     | 0.54 | 0.62 | 1.36  | 0.00  | -1.14 | -0.68 | -0.32 | 1.38  | 1.40  | -0.75 | -0.79 | -0.46 |
| P10412 | Histone H1.4                                                    | HIST1H1E  | 0.54 | 1.76 | 0.89  | -1.39 | -0.09 | 0.65  | -1.84 | -0.47 | -0.16 | 0.42  | 1.13  | 0.86  |
| P16083 | Ribosylidihyronicotinamide dehydrogenase [quinone]              | NQO2      | 0.54 | 0.48 | 1.22  | -0.09 | -0.13 | -0.76 | -0.87 | 0.15  | 0.27  | 2.08  | -0.93 | -0.94 |
| Q9NP58 | ATP-binding cassette sub-family B member 6, mitochondrial       | ABCB6     | 0.54 | 0.80 | 0.79  | -0.80 | -0.95 | -0.32 | 0.32  | 1.60  | -0.65 | -1.16 | -0.30 | 1.49  |
| Q96KQ4 | Apoptosis-stimulating of p53 protein 1                          | PPP1R13B  | 0.54 | 0.61 | 0.67  | 0.71  | -1.53 | -0.59 | -0.04 | 1.15  | 0.60  | -1.79 | 0.14  | 0.67  |
| O95376 | E3 ubiquitin-protein ligase ARIH2                               | ARIH2     | 0.54 | 0.66 | 1.10  | 0.46  | -2.63 | 0.34  | -0.12 | 0.18  | 0.37  | 0.12  | 0.51  | -0.32 |
| A4D1P6 | WD repeat-containing protein 91                                 | WDR91     | 0.54 | 0.63 | 1.85  | -0.34 | -2.11 | -0.34 | 0.14  | 0.62  | 0.34  | -0.48 | -0.04 | 0.37  |
| Q9P2F6 | Rho GTPase-activating protein 20                                | ARHGAP20  | 0.53 | 1.18 | 1.00  | -1.39 | -0.59 | 1.02  | -1.36 | 0.05  | -0.83 | 1.14  | 0.92  | 0.04  |
| P54105 | Methylosome subunit pICln                                       | CLNS1A    | 0.53 | 1.21 | 0.52  | 0.19  | -0.63 | -0.32 | -1.11 | 0.90  | -0.35 | -1.70 | 1.17  | 1.33  |
| O14662 | Syntaxin-16                                                     | STX16     | 0.53 | 0.64 | -0.66 | 1.11  | -1.29 | 0.42  | -0.38 | 0.69  | 0.91  | -1.44 | -0.62 | 1.26  |
| Q9NV70 | Exocyst complex component 1                                     | EXOC1     | 0.53 | 1.22 | -1.93 | -0.17 | -1.21 | 1.00  | 0.95  | 0.34  | -0.25 | -0.42 | 1.06  | 0.64  |
| P08236 | Beta-glucuronidase                                              | GUSB      | 0.53 | 0.71 | -0.31 | -0.60 | 1.13  | -0.58 | -0.52 | -0.60 | -0.59 | 2.37  | -0.53 | 0.23  |
| Q7LBC6 | Lysine-specific demethylase 3B                                  | KDM3B     | 0.53 | 0.56 | 1.14  | -0.34 | -1.99 | 0.06  | 0.42  | 1.40  | 0.22  | -1.17 | 0.27  | -0.01 |
| Q9P2Q2 | FERM domain-containing protein 4A                               | FRMD4A    | 0.53 | 3.14 | 0.10  | -0.03 | -1.10 | 0.40  | -1.91 | -0.02 | 1.44  | 1.36  | -0.03 | -0.22 |
| Q9UP95 | Solute carrier family 12 member 4                               | SLC12A4   | 0.53 | 1.18 | -0.30 | -0.51 | -0.68 | 0.55  | -0.40 | -0.31 | -0.36 | -0.93 | 0.39  | 2.55  |
| Q5SSJ5 | Heterochromatin protein 1-binding protein 3                     | HP1BP3    | 0.53 | 1.13 | -0.31 | -1.32 | 0.84  | 0.58  | -1.04 | -0.29 | -1.16 | 1.70  | 0.83  | 0.17  |
| O43896 | Kinesin-like protein KIF1C                                      | KIF1C     | 0.53 | 0.91 | 0.45  | 0.02  | -0.71 | 0.79  | -1.61 | 1.06  | 1.24  | -1.52 | 0.29  | 0.00  |
| O15382 | Branched-chain-amino-acid aminotransferase, mitochondrial       | BCAT2     | 0.53 | 0.97 | -0.01 | -0.21 | -0.43 | -0.26 | -0.26 | -0.23 | -0.21 | -0.84 | -0.33 | 2.78  |
| Q96FV2 | Secernin-2                                                      | SCRN2     | 0.53 | 1.02 | -1.49 | 0.21  | 0.18  | 0.12  | -0.19 | 1.41  | -1.83 | 0.13  | 0.40  | 1.07  |
| Q9Y266 | Nuclear migration protein nudC                                  | NUDC      | 0.53 | 1.07 | 1.17  | 0.38  | -0.69 | -0.13 | -1.95 | 1.29  | 0.62  | -0.94 | -0.21 | 0.46  |
| Q6P589 | Tumor necrosis factor alpha-induced protein 8-like protein 2    | TNFAIP8L2 | 0.53 | 1.13 | -0.42 | -0.58 | -0.84 | 1.18  | -0.60 | -0.67 | -0.64 | 1.60  | -0.54 | 1.53  |
| P53367 | Arfap1n-1                                                       | ARFIP1    | 0.53 | 0.57 | 1.56  | -0.53 | -0.69 | -0.49 | -0.57 | 1.59  | -0.49 | -0.93 | -0.58 | 1.14  |
| Q92794 | Histone acetyltransferase KAT6A                                 | KAT6A     | 0.53 | 0.51 | 1.28  | -0.90 | -1.06 | -0.90 | 0.93  | 0.58  | 0.75  | 1.12  | -0.94 | -0.85 |
| P62910 | 60S ribosomal protein L32                                       | RPL32     | 0.53 | 0.72 | 1.01  | -1.63 | -0.92 | -0.75 | 1.41  | 0.71  | 0.96  | -0.06 | -0.72 | 0.01  |
| Q9Y2H6 | Fibronectin type-III domain-containing protein 3A               | FNDC3A    | 0.53 | 0.55 | 0.76  | 0.31  | -1.74 | 0.18  | -0.22 | 0.31  | 0.93  | -1.84 | 0.58  | 0.72  |
| P45381 | Aspartoacylase                                                  | ASPA      | 0.53 | 0.47 | 0.47  | -1.65 | 0.82  | 0.72  | -0.97 | -0.06 | -0.11 | 1.26  | 0.82  | -1.29 |
| Q9BRF8 | Serine/threonine-protein phosphatase CPPED1                     | CPPED1    | 0.53 | 0.41 | 1.18  | -1.12 | 0.33  | 0.15  | -1.08 | -1.09 | -0.85 | 1.69  | 0.41  | 0.38  |
| Q9P287 | BRCA2 and CDKN1A-interacting protein                            | BCCIP     | 0.53 | 0.59 | 0.55  | -0.77 | -1.04 | 1.30  | -0.80 | 1.34  | -0.89 | -1.07 | 0.53  | 0.83  |
| O60942 | mRNA-capping enzyme                                             | RNGTT     | 0.53 | 0.52 | 1.43  | -1.21 | 0.51  | -0.13 | -1.28 | 0.97  | 1.20  | -0.50 | -0.96 | -0.04 |
| O00560 | Syntenin-1                                                      | SDCBP     | 0.52 | 2.48 | -1.92 | -0.10 | 0.66  | -0.63 | -0.21 | -0.24 | 1.96  | 0.68  | 0.00  | -0.20 |
| Q96AC1 | Fermitin family homolog 2                                       | FERMT2    | 0.52 | 2.57 | 1.22  | -1.66 | -0.68 | -0.34 | -0.79 | 1.78  | 0.19  | 0.50  | 0.10  | -0.31 |
| Q15759 | Mitogen-activated protein kinase 11                             | MAPK11    | 0.52 | 0.42 | 0.70  | -0.04 | -0.85 | 0.10  | -0.47 | 1.20  | 1.69  | -1.61 | 0.09  | -0.81 |
| P17655 | Calpain-2 catalytic subunit                                     | CAPN2     | 0.52 | 0.99 | 0.99  | -0.98 | -0.11 | -0.07 | -0.97 | 1.73  | -1.61 | 0.61  | 0.10  | 0.32  |
| Q9HCJ3 | Ribonucleoprotein PTB-binding 2                                 | RAVER2    | 0.52 | 0.53 | 0.80  | 0.63  | -0.24 | -0.90 | -0.97 | 0.05  | -0.87 | -1.25 | 1.21  | 1.55  |
| P11310 | Medium-chain specific acyl-CoA dehydrogenase, mitochondrial     | ACADM     | 0.52 | 0.50 | 0.68  | -1.70 | 0.98  | -0.62 | 0.02  | 0.14  | -0.55 | 1.88  | -0.61 | -0.23 |
| P62380 | TATA box-binding protein-like protein 1                         | TBP1L     | 0.52 | 0.69 | -0.70 | -0.72 | -1.08 | 0.56  | 1.10  | 0.45  | 0.20  | 1.90  | -0.90 | -0.80 |
| Q9H3P2 | Negative elongation factor A                                    | NELFA     | 0.52 | 0.61 | -0.29 | -1.22 | -1.36 | 1.07  | 1.03  | -0.62 | -0.89 | 0.25  | 1.15  | 0.88  |
| Q99959 | Plakophilin-2                                                   | PKP2      | 0.52 | 0.19 | -1.08 | 0.54  | 0.93  | -1.24 | 0.59  | -1.14 | -1.12 | 1.15  | 0.71  | 0.66  |
| P18206 | Vinculin                                                        | VCL       | 0.52 | 0.61 | 0.63  | -0.13 | -2.21 | -0.34 | 1.27  | 0.50  | 0.40  | 0.81  | -0.95 | 0.02  |
| P28290 | Protein ITPRID2                                                 | ITPRID2   | 0.52 | 1.02 | -0.12 | -0.33 | -0.43 | -0.07 | -0.27 | 2.80  | -0.32 | -0.73 | -0.21 | -0.32 |
| Q04759 | Protein kinase C theta type                                     | PRKCQ     | 0.52 | 0.68 | 1.88  | -0.68 | -0.72 | -0.63 | -0.70 | 0.49  | 0.82  | -1.00 | 1.14  | -0.61 |
| O14744 | Protein arginine N-methyltransferase 5                          | PRMT5     | 0.52 | 0.44 | -0.05 | -0.56 | 0.83  | -1.18 | 0.37  | 0.51  | -1.89 | 1.56  | -0.03 | 0.44  |
| Q5M775 | Cytospin-B                                                      | SPECC1    | 0.52 | 0.48 | 0.72  | 0.25  | -1.39 | -0.03 | -0.18 | 0.24  | 2.17  | -1.01 | 0.04  | -0.82 |
| O15034 | RIMS-binding protein 2                                          | RIMBP2    | 0.52 | 0.66 | -0.88 | 0.93  | -1.17 | 0.14  | 0.15  | 0.75  | 1.63  | 0.61  | -1.08 | -1.08 |
| Q9UKY7 | Protein CDV3 homolog                                            | CDV3      | 0.52 | 0.36 | 0.59  | 0.20  | 0.32  | -1.59 | -0.01 | 1.28  | 1.21  | -0.20 | -1.68 | -0.12 |
| Q96I20 | PRKC apoptosis WT1 regulator protein                            | PAWR      | 0.52 | 1.06 | 0.10  | -0.22 | -0.55 | -0.22 | -0.36 | -0.29 | -0.26 | -0.68 | -0.31 | 2.78  |
| P35813 | Protein phosphatase 1A                                          | PPM1A     | 0.52 | 1.24 | -2.14 | 0.71  | 0.59  | 0.27  | -0.78 | -0.87 | 1.31  | 0.52  | 0.02  | 0.38  |
| P28070 | Proteasome subunit beta type-4                                  | PSMB4     | 0.52 | 1.63 | -0.88 | -1.78 | 0.42  | -0.17 | 0.76  | -0.07 | -0.33 | 2.04  | 0.07  | -0.06 |
| Q96GX9 | Methylthioribulose-1-phosphate dehydratase                      | APIP      | 0.51 | 0.75 | -0.67 | 0.40  | -1.46 | 0.51  | 0.29  | 0.41  | -1.67 | 1.68  | 0.14  | 0.37  |
| Q15233 | Non-POU domain-containing octamer-binding protein               | NONO      | 0.51 | 2.47 | 0.94  | 0.13  | -1.24 | -0.27 | -1.77 | 1.40  | 0.35  | -0.69 | 0.30  | 0.84  |
| P5VW22 | Lysophospholipase-like protein 1                                | LYPLAL1   | 0.51 | 0.72 | 0.88  | 0.07  | -1.79 | 0.81  | -0.85 | 1.42  | -0.73 | -0.78 | 0.45  | 0.51  |
| Q7406  | mRNA export factor                                              | RAE1      | 0.51 | 0.80 | -0.47 | 0.70  | -0.75 | -0.50 | 0.06  | -0.68 | -0.54 | 2.56  | -0.43 | 0.07  |
| Q4J6C6 | Prolyl endopeptidase-like                                       | PREPL     | 0.51 | 1.79 | -0.01 | -1.75 | 0.95  | 0.15  | -1.12 | -0.04 | 1.81  | 0.49  | -0.48 | -0.01 |
| Q8NFV9 | Rab effector MyRIP                                              | MYRIP     | 0.51 | 0.55 | 0.04  | 0.68  | -2.01 | -0.06 | 0.66  | -0.27 | 1.17  | 1.15  | -0.25 | -1.10 |
| Q5H9L2 | Transcription elongation factor A protein-like 5                | TCEAL5    | 0.51 | 1.01 | -0.10 | -0.30 | -0.42 | -0.23 | -0.16 | -0.13 | -1.00 | 2.75  | -0.21 | -0.19 |
| P60228 | Eukaryotic translation initiation factor 3 subunit E            | EIF3E     | 0.51 | 1.53 | 0.29  | -0.27 | -0.36 | -0.28 | -1.02 | 1.69  | 0.94  | -1.70 | -0.24 | 0.95  |
| P14621 | Acylphosphatase-2                                               | ACYP2     | 0.51 | 1.16 | -1.06 | -1.22 | 0.38  | 0.14  | 0.46  | 0.22  | -1.74 | 0.99  | 0.51  | 1.31  |
| Q96T49 | Protein phosphatase 1 regulatory inhibitor subunit 16B          | PPP1R16B  | 0.50 | 0.53 | -0.47 | 0.70  | -1.59 | 0.73  | -0.05 | -1.87 | 0.53  | 0.68  | 0.89  | 0.45  |

|        |                                                                         |         |      |      |       |       |       |       |       |       |       |       |       |       |
|--------|-------------------------------------------------------------------------|---------|------|------|-------|-------|-------|-------|-------|-------|-------|-------|-------|-------|
| O75508 | Claudin-11                                                              | CLDN11  | 0.50 | 0.58 | 1.40  | -0.21 | -0.41 | -0.82 | -0.70 | 1.55  | 1.29  | -0.47 | -1.02 | -0.61 |
| P22392 | Nucleoside diphosphate kinase B                                         | NME2    | 0.50 | 1.29 | -0.56 | 0.81  | -1.52 | -0.80 | 0.66  | 0.94  | -0.36 | 1.68  | -0.91 | 0.05  |
| Q01469 | Fatty acid-binding protein 5                                            | FABP5   | 0.50 | 0.73 | 0.50  | -0.59 | -0.38 | -0.61 | 0.17  | 0.57  | -1.29 | 2.34  | -0.10 | -0.60 |
| Q9BS26 | Endoplasmic reticulum resident protein 44                               | ERP44   | 0.50 | 1.04 | -0.32 | 0.89  | -0.71 | -0.51 | -0.55 | 1.73  | -0.46 | -0.98 | -0.64 | 1.56  |
| O60547 | GDP-mannose 4,6 dehydratase                                             | GMDS    | 0.50 | 0.80 | 0.04  | 0.36  | 0.44  | 0.17  | -1.97 | -1.47 | -0.15 | 1.32  | 0.80  | 0.45  |
| Q14185 | Dedicator of cytokinesis protein 1                                      | DOCK1   | 0.50 | 0.69 | -0.84 | -0.69 | 1.44  | -0.38 | -0.48 | 1.00  | 0.11  | -1.68 | 1.21  | 0.31  |
| Q9Y3S1 | Serine/threonine-protein kinase WNK2                                    | WNK2    | 0.50 | 0.77 | -2.14 | 0.07  | -0.37 | 1.01  | 0.59  | -1.14 | 0.39  | 1.02  | 0.65  | -0.08 |
| Q9H1K1 | Iron-sulfur cluster assembly enzyme ISCU, mitochondrial                 | ISCU    | 0.50 | 1.45 | 0.45  | -0.31 | -2.41 | 0.03  | 0.70  | -0.69 | 0.95  | 0.78  | -0.13 | 0.63  |
| Q14576 | ELAV-like protein 3                                                     | ELAVL3  | 0.50 | 1.85 | -0.32 | -1.87 | -1.24 | 1.01  | 0.59  | 0.05  | 1.08  | -0.45 | 1.04  | 0.11  |
| P25685 | DnaJ homolog subfamily B member 1                                       | DNAJB1  | 0.50 | 0.79 | -0.87 | 1.18  | -0.63 | -0.15 | -0.49 | -0.18 | -0.07 | -1.53 | 1.19  | 1.55  |
| P04271 | Protein S100-B                                                          | S100B   | 0.50 | 0.17 | -1.13 | 0.42  | 0.90  | -1.17 | 0.73  | -1.16 | -1.14 | 0.73  | 0.92  | 0.89  |
| Q9H0C8 | Integrin-linked kinase-associated serine/threonine phosphatase 2C       | ILKAP   | 0.50 | 0.59 | 0.17  | 0.11  | -1.77 | 0.75  | -0.01 | 0.88  | 0.36  | -1.86 | 0.74  | 0.63  |
| Q96TC7 | Regulator of microtubule dynamics protein 3                             | RMDN3   | 0.50 | 0.84 | -1.41 | 1.16  | 0.59  | -0.65 | -0.68 | 1.51  | -0.63 | -1.04 | 0.58  | 0.57  |
| O75822 | Eukaryotic translation initiation factor 3 subunit J                    | EIF3J   | 0.50 | 2.03 | -2.28 | -0.26 | 0.13  | 0.24  | 0.24  | 1.17  | 0.48  | 0.12  | 1.07  | -0.92 |
| O00442 | RNA 3'-terminal phosphate cyclase                                       | RTCA    | 0.50 | 0.32 | -1.28 | 0.41  | 1.00  | -1.03 | 0.45  | -1.09 | -1.06 | 1.38  | 0.63  | 0.58  |
| Q96KR1 | Zinc finger RNA-binding protein                                         | ZFR     | 0.50 | 1.49 | 0.19  | -2.00 | -0.92 | 1.31  | -0.16 | 0.23  | -0.73 | 0.42  | 1.19  | 0.47  |
| P63220 | 40S ribosomal protein S21                                               | RPS21   | 0.50 | 2.21 | -0.08 | 0.32  | -0.72 | -0.91 | -0.71 | -1.49 | 1.42  | 1.20  | -0.19 | 1.15  |
| O95622 | Adenylate cyclase type 5                                                | ADCY5   | 0.49 | 1.59 | -0.75 | 1.22  | -2.17 | -0.30 | 0.35  | 0.12  | 1.01  | 0.23  | -0.51 | 0.82  |
| P27348 | 14-3-3 protein theta                                                    | YWHAQ   | 0.49 | 2.03 | 0.40  | 0.39  | -0.35 | -0.64 | -1.73 | 1.41  | 1.29  | -0.89 | -0.53 | 0.64  |
| Q9ULE6 | Paladin                                                                 | PALD1   | 0.49 | 0.93 | 0.35  | -2.75 | 0.35  | 0.09  | 0.84  | 0.04  | 0.00  | 0.14  | 0.53  | 0.42  |
| Q9UBF8 | Phosphatidylinositol 4-kinase beta                                      | PI4KB   | 0.49 | 1.71 | 0.09  | -0.49 | -0.93 | -0.17 | -0.29 | -0.16 | -0.20 | -1.29 | 1.43  | 2.00  |
| Q96PU4 | E3 ubiquitin-protein ligase UHRF2                                       | UHRF2   | 0.49 | 0.78 | 0.87  | 0.18  | 0.01  | -0.90 | -0.08 | -0.71 | 1.87  | -0.22 | 1.08  | -1.07 |
| Q8NC51 | Plasminogen activator inhibitor 1 RNA-binding protein                   | SERBP1  | 0.49 | 0.48 | 0.59  | 0.72  | 0.51  | -2.17 | -0.28 | 0.43  | 1.01  | -0.27 | -1.17 | 0.64  |
| A0M266 | Shootin-1                                                               | SHTN1   | 0.49 | 0.67 | 1.40  | -0.08 | -0.64 | -0.82 | -0.69 | 2.00  | 0.38  | -0.44 | -0.04 | -1.07 |
| Q93074 | Mediator of RNA polymerase II transcription subunit 12                  | MED12   | 0.49 | 0.71 | 1.10  | 0.52  | -1.34 | 0.02  | -1.17 | 1.12  | -1.12 | 0.65  | 0.94  | -0.72 |
| P26012 | Integrin beta-8                                                         | ITGB8   | 0.49 | 0.72 | -1.19 | -0.05 | -1.16 | 0.91  | 0.61  | -1.21 | 0.40  | -0.68 | 0.94  | 1.43  |
| P16219 | Short-chain specific acyl-CoA dehydrogenase, mitochondrial              | ACADS   | 0.49 | 0.47 | -1.65 | -0.33 | 0.15  | 0.64  | 0.57  | -0.12 | -1.78 | 1.00  | 0.94  | 0.58  |
| Q14258 | E3 ubiquitin/ISG15 ligase TRIM25                                        | TRIM25  | 0.49 | 0.98 | 0.51  | 0.51  | -2.46 | 0.00  | 0.31  | 1.01  | 0.75  | -0.70 | -0.30 | 0.39  |
| P46108 | Adapter molecule crk                                                    | CRK     | 0.49 | 4.97 | -1.39 | -0.79 | -1.07 | 0.15  | -0.15 | 1.20  | -0.18 | 1.67  | -0.38 | 0.93  |
| P08237 | ATP-dependent 6-phosphofructokinase, muscle type                        | PFKM    | 0.48 | 3.33 | -1.01 | -1.62 | 0.63  | 0.30  | -0.91 | -0.02 | 0.16  | 1.93  | 0.50  | 0.04  |
| P07998 | Ribonuclease pancreatic                                                 | RNASE1  | 0.48 | 0.40 | -0.15 | -0.54 | 0.69  | 0.65  | -1.19 | -1.17 | -1.10 | 1.74  | 0.86  | 0.22  |
| Q14195 | Dihydropyrimidine-related protein 3                                     | DPYSL3  | 0.48 | 2.30 | -0.61 | -0.86 | 0.46  | -0.87 | -0.27 | 1.58  | -1.05 | 1.78  | -0.21 | 0.05  |
| P50895 | Basal cell adhesion molecule                                            | BCAM    | 0.48 | 0.78 | 1.41  | -0.53 | -0.61 | -0.81 | -0.41 | 1.45  | -0.99 | 1.15  | -1.01 | 0.35  |
| Q02790 | Peptidyl-prolyl cis-trans isomerase FKBP4                               | FKBP4   | 0.48 | 1.15 | -2.01 | 1.19  | 0.25  | 0.22  | -0.94 | 1.08  | -0.17 | -0.70 | 0.16  | 0.93  |
| Q8IXF0 | Neuronal PAS domain-containing protein 3                                | NPAS3   | 0.48 | 1.10 | -0.04 | -0.26 | -0.46 | -0.09 | -0.44 | -0.07 | 2.78  | -0.75 | -0.37 | -0.29 |
| Q59EK9 | RUN domain-containing protein 3A                                        | RUNDC3A | 0.48 | 0.60 | -0.15 | 1.01  | -2.45 | 0.36  | 0.46  | -0.85 | 0.11  | 0.69  | 0.23  | 0.59  |
| P61966 | AP-1 complex subunit sigma-1A                                           | AP1S1   | 0.48 | 0.48 | -0.10 | 0.46  | -0.97 | -0.93 | 0.91  | 0.43  | 1.82  | -1.24 | 0.52  | -0.91 |
| Q9C026 | E3 ubiquitin-protein ligase TRIM9                                       | TRIM9   | 0.48 | 0.66 | -1.45 | -1.40 | 0.08  | 0.48  | 1.46  | -0.77 | -0.60 | 0.74  | 0.71  | 0.75  |
| P11182 | Lipoamide acyltransferase component of branched-chain alpha-keto        | DBT     | 0.48 | 0.68 | 0.61  | -1.49 | 1.26  | -1.53 | 0.30  | -0.28 | -0.06 | -0.60 | 0.49  | 1.31  |
| Q9BXJ9 | N-alpha-acetyltransferase 15, NatA auxiliary subunit                    | NAA15   | 0.48 | 0.56 | -2.32 | 0.26  | 0.81  | 0.48  | 0.06  | -1.20 | 0.00  | 0.63  | 0.58  | 0.70  |
| Q75592 | E3 ubiquitin-protein ligase MYCBP2                                      | MYCBP2  | 0.48 | 0.78 | 1.13  | -0.86 | -1.30 | 0.19  | -0.10 | 0.94  | 1.14  | -1.53 | -0.36 | 0.76  |
| P15880 | 40S ribosomal protein S2                                                | RPS2    | 0.48 | 1.74 | -0.54 | -1.45 | 0.84  | -0.10 | -0.49 | -0.11 | -0.36 | 2.30  | -0.36 | 0.26  |
| P30041 | Peroxisomal protein 6                                                   | PRDX6   | 0.48 | 1.64 | -0.57 | -1.11 | -0.74 | 0.55  | 0.18  | 1.10  | -1.84 | 0.76  | 0.87  | 0.79  |
| O75874 | Isocitrate dehydrogenase [NADP] cytoplasmic                             | IDH1    | 0.48 | 1.57 | -0.32 | 1.06  | -1.61 | -0.24 | -0.50 | -0.72 | -0.05 | 2.05  | 0.37  | -0.03 |
| O00161 | Synaptosomal-associated protein 23                                      | SNAP23  | 0.48 | 0.65 | -0.63 | 0.92  | -1.12 | 0.84  | -0.83 | 0.60  | -0.80 | -1.23 | 0.91  | 1.33  |
| Q9NYB9 | Abl interactor 2                                                        | ABI2    | 0.48 | 0.58 | 0.33  | 0.90  | -2.58 | -0.03 | 0.63  | 0.52  | 0.59  | 0.36  | -0.31 | -0.41 |
| Q9HBF4 | Zinc finger FYVE domain-containing protein 1                            | ZFYVE1  | 0.48 | 0.82 | -0.21 | -0.22 | -0.44 | 0.24  | -0.38 | -1.89 | -0.39 | 1.94  | 0.45  | 0.91  |
| P09936 | Ubiquitin carboxyl-terminal hydrolase isozyme L1                        | UCHL1   | 0.48 | 1.92 | -0.54 | 0.33  | 0.08  | -0.27 | -1.48 | 0.18  | 2.37  | 0.23  | -0.11 | -0.79 |
| Q9Y5U9 | Immediate early response 3-interacting protein 1                        | IER3IP1 | 0.48 | 0.98 | -0.09 | -0.32 | -0.37 | -0.09 | -0.33 | -0.30 | -0.34 | -0.66 | -0.33 | 2.81  |
| Q9UQ80 | Proliferation-associated protein 2G4                                    | PA2G4   | 0.48 | 1.58 | 0.13  | -0.18 | 0.39  | 0.47  | -2.47 | 0.72  | 0.73  | -0.78 | 0.07  | 0.91  |
| P07195 | L-lactate dehydrogenase B chain                                         | LDHB    | 0.47 | 1.12 | -0.52 | -0.74 | 0.32  | 0.03  | -0.39 | -0.42 | -0.53 | 2.61  | 0.37  | -0.73 |
| P07384 | Calpain-1 catalytic subunit                                             | CAPN1   | 0.47 | 1.36 | 1.85  | -1.08 | -0.53 | -0.28 | -1.44 | 0.02  | -0.14 | 1.36  | -0.08 | 0.32  |
| Q92575 | UBX domain-containing protein 4                                         | UBXN4   | 0.47 | 1.05 | 0.12  | -0.36 | -0.45 | -0.30 | -0.25 | -0.30 | -0.17 | -0.88 | -0.16 | 2.75  |
| P07305 | Histone H1.0                                                            | H1FO    | 0.47 | 1.43 | 0.71  | -0.91 | 0.89  | -0.03 | -2.21 | 0.08  | -0.46 | 0.34  | 0.34  | 1.24  |
| Q5HYK7 | SH3 domain-containing protein 19                                        | SH3D19  | 0.47 | 0.34 | 1.56  | -0.03 | -1.02 | -0.89 | -0.09 | 1.28  | 1.05  | -1.10 | -0.87 | 0.10  |
| P63165 | Small ubiquitin-related modifier 1                                      | SUMO1   | 0.47 | 0.44 | -0.82 | -0.92 | -1.03 | 0.63  | 1.56  | -0.92 | -0.90 | 0.67  | 0.91  | 0.80  |
| P02749 | Beta-2-glycoprotein 1                                                   | APOH    | 0.47 | 1.60 | -1.32 | -1.63 | 1.35  | -0.55 | 0.48  | 0.03  | 0.22  | 0.47  | -0.40 | 1.34  |
| P54829 | Tyrosine-protein phosphatase non-receptor type 5                        | PTPN5   | 0.47 | 1.44 | -0.34 | -0.33 | -0.73 | 0.55  | -0.70 | 1.75  | 1.22  | -0.07 | 0.32  | -1.67 |
| Q15121 | Astrocytic phosphoprotein PEA-15                                        | PEA15   | 0.47 | 1.17 | 0.50  | 0.63  | -0.54 | -1.34 | -0.57 | 1.39  | 1.04  | -0.98 | -1.06 | 0.91  |
| P49792 | E3 SUMO-protein ligase RanBP2                                           | RANBP2  | 0.47 | 0.61 | -0.04 | 1.12  | -0.39 | -1.58 | 0.13  | -0.26 | 1.83  | -1.15 | 0.54  | -0.20 |
| Q9H7E2 | Tudor domain-containing protein 3                                       | TDRD3   | 0.47 | 0.66 | 0.84  | 0.16  | -0.22 | -0.26 | -1.35 | 1.33  | 0.69  | 0.43  | 0.32  | -1.95 |
| Q9NQ88 | Fructose-2,6-bisphosphatase TIGAR                                       | TIGAR   | 0.47 | 1.11 | -1.34 | 0.15  | -0.16 | 0.82  | -1.03 | 0.90  | -1.25 | -0.62 | 0.79  | 1.44  |
| Q07352 | mRNA decay activator protein ZFP36L1                                    | ZFP36L1 | 0.47 | 1.73 | -0.96 | 0.29  | -1.38 | -0.26 | 1.41  | 1.28  | -0.23 | 1.14  | -0.32 | -0.98 |
| Q9NVH1 | DnaJ homolog subfamily C member 11                                      | DNAJC11 | 0.47 | 0.62 | 0.76  | 1.31  | -1.01 | -0.85 | -0.99 | 0.66  | -0.79 | 0.25  | -0.82 | 1.48  |
| Q8IY17 | Neuropathy target esterase                                              | PNPLA6  | 0.47 | 1.60 | 1.09  | -1.66 | -0.03 | 0.46  | -1.51 | -0.42 | 0.21  | -0.26 | 1.09  | 1.04  |
| Q96G46 | tRNA-dihydrouridine(47) synthase [NAD(P)(+)]-like                       | DUS3L   | 0.47 | 0.73 | 0.79  | -0.69 | -0.96 | -0.75 | 0.71  | -0.68 | 1.41  | 1.57  | -0.73 | -0.67 |
| P51148 | Ras-related protein Rab-5C                                              | RAB5C   | 0.47 | 3.54 | 0.30  | -1.75 | 0.28  | 0.11  | -1.72 | -0.21 | 0.94  | 0.16  | 1.16  | 0.73  |
| P35711 | Transcription factor SOX-5                                              | SOX5    | 0.46 | 0.41 | -0.77 | 1.01  | -0.98 | 1.14  | -0.95 | 0.75  | -0.80 | -1.16 | 1.17  | 0.58  |
| Q70E73 | Ras-associated and pleckstrin homology domains-containing protein RAPH1 | RAPH1   | 0.46 | 0.55 | 0.37  | 0.44  | -2.68 | 0.55  | 0.60  | 0.01  | 0.00  | -0.40 | 0.49  | 0.63  |
| Q14019 | Coactosin-like protein                                                  | COTL1   | 0.46 | 1.84 | -0.39 | -0.80 | 0.75  | 0.62  | -1.99 | 0.67  | -1.07 | 0.78  | 0.95  | 0.47  |
| Q66K74 | Microtubule-associated protein 15                                       | MAP15   | 0.46 | 1.37 | -0.25 | -0.50 | -1.41 | -0.72 | 1.42  | -0.05 | 0.05  | 0.79  | -0.95 | 1.63  |
| Q9P2R6 | Arginine-glutamic acid dipeptide repeats protein                        | REER    | 0.46 | 2.68 | -0.81 | 0.44  | -0.05 | -2.39 | 0.43  | 0.82  | 0.72  | -0.42 | 0.85  | 0.41  |
| Q99543 | DnaJ homolog subfamily C member 2                                       | DNAJC2  | 0.46 | 0.38 | 0.70  | -0.83 | -1.28 | -0.26 | 1.16  | 0.75  | 1.62  | -0.14 | -1.05 | -0.68 |
| Q9Y224 | RNA transcription, translation and transport factor protein             | RTRAF   | 0.46 | 0.61 | -0.90 | -0.28 | -0.86 | -0.39 | 1.67  | 0.85  | -1.06 | -0.09 | -0.47 | 1.53  |
| P19404 | NADH dehydrogenase [ubiquinone] flavoprotein 2, mitochondrial           | NDUFV2  | 0.46 | 0.38 | -0.91 | 0.61  | -0.21 | 1.11  | -1.11 | -1.08 | -1.06 | 1.07  | 1.34  | 0.23  |
| P61077 | Ubiquitin-conjugating enzyme E2 D3                                      | UBE2D3  | 0.46 | 0.96 | -0.28 | -0.10 | -2.47 | 0.92  | 0.79  | -0.06 | -0.35 | 0.57  | 0.96  | 0.02  |
| P52948 | Nuclear pore complex protein Nup98-Nup96                                | NUP98   | 0.46 | 0.66 | -0.35 | -0.60 | -0.70 | 1.38  | -0.55 | -0.61 | -0.51 | -0.95 | 1.65  | 1.25  |
| O60674 | Tyrosine-protein kinase JAK2                                            | JAK2    | 0.46 | 0.59 | -0.30 | -0.46 | -0.81 | 1.47  | -0.64 | -0.47 | -0.62 | -0.96 | 1.52  | 1.28  |
| O94819 | Kelch repeat and BTB domain-containing protein 11                       | KBTBD11 | 0.46 | 1.87 | -1.33 | -0.26 | 0.35  | 1.15  | -1.76 | -0.46 | 0.44  | 0.87  | 1.19  | -0.19 |
| P68871 | Hemoglobin subunit beta                                                 | HBB     | 0.46 | 1.28 | -0.10 | -0.94 | -0.56 | -0.09 | 0.26  | -1.47 | 0.53  | 2.28  | 0.26  | -0.17 |
| P17844 | Probable ATP-dependent RNA helicase DDX5                                | DDX5    | 0.46 | 0.66 | 1.43  | -1.64 | -1.21 | -0.30 | 0.89  | 0.86  | 0.53  | -0.90 | 0.20  | 0.15  |
| P40925 | Malate dehydrogenase, cytoplasmic                                       | MDH1    | 0.46 | 0.55 | -0.19 | -0.10 | -0.01 | -0.38 | -0.05 | -0.02 | -1.21 | 2.66  | -0.22 | -0.47 |
| Q9Y6F6 | Protein MRV11                                                           | MRV11   | 0.45 | 0.50 | 1.33  | 0.41  | -0.93 | -0.53 | -0.92 | 1.27  | 1.23  | -1.10 | -0.84 | 0.08  |



|        |                                                                   |          |      |      |       |       |       |       |       |       |       |       |       |       |
|--------|-------------------------------------------------------------------|----------|------|------|-------|-------|-------|-------|-------|-------|-------|-------|-------|-------|
| Q95571 | Persulfide dioxygenase ETHE1, mitochondrial                       | ETHE1    | 0.45 | 0.49 | -0.76 | 0.90  | 1.23  | -0.95 | -1.06 | -0.98 | -0.92 | 1.05  | 0.67  | 0.82  |
| Q61N85 | Serine/threonine-protein phosphatase 4 regulatory subunit 3A      | PPP4R3A  | 0.45 | 0.56 | 1.46  | -1.04 | -1.21 | -0.15 | 0.22  | -0.36 | 0.88  | -1.37 | 0.41  | 1.14  |
| Q8N1G2 | Cap-specific mRNA (nucleoside-2'-O-)-methyltransferase 1          | CMTR1    | 0.45 | 0.56 | 1.44  | -1.08 | -1.23 | 1.29  | -1.16 | 0.60  | -0.27 | 0.03  | 0.80  | -0.43 |
| Q9UPU9 | Protein Smaug homolog 1                                           | SAMD4A   | 0.45 | 0.65 | 0.60  | -0.25 | -0.54 | -0.28 | -0.35 | 2.66  | -0.37 | -0.82 | -0.35 | -0.30 |
| P49321 | Nuclear autoantigenic sperm protein                               | NASP     | 0.45 | 0.50 | -0.47 | -0.62 | -0.80 | 1.85  | -0.61 | -0.61 | -0.50 | 1.27  | -0.66 | 1.15  |
| P30519 | Heme oxygenase 2                                                  | HMOX2    | 0.45 | 0.61 | 0.24  | 1.10  | 0.12  | 0.19  | -2.44 | 0.66  | 0.69  | -0.89 | 0.17  | 0.15  |
| Q9BQ90 | Kelch domain-containing protein 3                                 | KLHDC3   | 0.45 | 0.47 | 1.10  | -0.79 | -0.65 | -0.33 | 0.06  | 1.28  | 1.73  | -0.98 | -0.75 | -0.67 |
| P49757 | Protein numb homolog                                              | NUMB     | 0.45 | 0.69 | -0.51 | 1.27  | -1.06 | 0.25  | -0.81 | -0.82 | 0.69  | -1.14 | 0.53  | 1.60  |
| Q9BWU0 | Kanadaplin                                                        | SLC4A1AP | 0.45 | 1.48 | 0.59  | 0.68  | -1.63 | -0.29 | -0.90 | 0.11  | 0.67  | -0.90 | -0.17 | 1.83  |
| Q8WVV9 | Heterogeneous nuclear ribonucleoprotein L-like                    | HNRNPL   | 0.45 | 0.91 | 1.26  | -2.01 | -0.95 | 0.25  | 0.37  | 0.78  | 1.00  | -0.35 | 0.32  | -0.67 |
| P61221 | ATP-binding cassette sub-family E member 1                        | ABCE1    | 0.45 | 1.80 | -0.52 | 0.20  | -1.68 | 0.16  | 0.04  | 0.33  | 0.52  | 1.87  | 0.40  | -1.34 |
| P62328 | Thymosin beta-4                                                   | TMSB4X   | 0.45 | 0.91 | 0.12  | -1.03 | -1.20 | 0.10  | 0.94  | -0.99 | -0.89 | 1.75  | 0.45  | 0.75  |
| Q9NR45 | Sialic acid synthase                                              | NANS     | 0.45 | 1.49 | -1.82 | 1.56  | -0.14 | -0.36 | -0.82 | 1.12  | -0.02 | -0.67 | 0.37  | 0.78  |
| Q9UPR0 | Inactive phospholipase C-like protein 2                           | PLCL2    | 0.45 | 0.79 | 1.18  | -1.40 | 0.20  | -0.45 | -0.49 | 1.87  | -0.18 | 0.59  | -0.20 | -1.12 |
| Q96HU1 | Small G protein signaling modulator 3                             | SGSM3    | 0.45 | 0.55 | 1.20  | -0.96 | -1.13 | -0.90 | 1.08  | 0.58  | -0.04 | -1.21 | 1.26  | 0.12  |
| Q9UPY8 | Microtubule-associated protein RP/EB family member 3              | MAPRE3   | 0.45 | 0.70 | -0.19 | 0.43  | -0.33 | -0.30 | -0.50 | -0.55 | 2.65  | -0.94 | -0.33 | 0.07  |
| P55209 | Nucleosome assembly protein 1-like 1                              | NAP1L1   | 0.45 | 1.51 | 0.07  | -0.31 | -1.28 | 0.50  | -0.59 | 1.63  | 0.70  | -1.73 | 0.66  | 0.33  |
| Q9BYG3 | MK167 FHA domain-interacting nucleolar phosphoprotein             | NIFK     | 0.45 | 1.04 | 0.20  | -0.13 | -0.70 | -0.14 | -0.46 | -0.14 | -0.24 | -0.81 | -0.30 | 2.72  |
| Q92743 | Serine protease HTRA1                                             | HTRA1    | 0.44 | 0.53 | 1.46  | -0.14 | -0.64 | -1.04 | -0.32 | 1.77  | -0.67 | -0.21 | -0.99 | 0.79  |
| P14624 | Inter-alpha-trypsin inhibitor heavy chain H4                      | ITIH4    | 0.44 | 1.53 | -1.74 | -0.30 | -0.81 | 1.84  | -0.62 | -0.03 | 0.26  | 0.02  | 1.14  | 0.26  |
| P24821 | Tenascin                                                          | TNC      | 0.44 | 0.50 | -0.69 | -1.36 | 0.33  | 0.91  | 0.16  | 0.22  | -1.63 | 1.17  | 1.23  | -0.34 |
| Q9UKU0 | Long-chain-fatty-acid--CoA ligase 6                               | ACSL6    | 0.44 | 0.83 | -0.24 | 0.81  | -0.50 | 0.16  | -1.23 | 0.72  | 0.68  | -1.97 | 0.33  | 1.24  |
| P40939 | Trifunctional enzyme subunit alpha, mitochondrial                 | HADHA    | 0.44 | 1.83 | -0.10 | -2.30 | 0.33  | 0.92  | -0.69 | 0.59  | 0.01  | -0.03 | 1.39  | -0.13 |
| P30048 | Thioredoxin-dependent peroxide reductase, mitochondrial           | PRDX3    | 0.44 | 0.34 | -1.77 | 0.03  | 0.54  | 0.31  | 0.43  | -1.85 | 0.17  | 1.17  | 0.48  | 0.49  |
| Q9NRX4 | 14 kDa phosphohistidine phosphatase                               | PHPT1    | 0.44 | 0.95 | 0.81  | 0.28  | -0.81 | 0.38  | -1.75 | 1.20  | 0.25  | -1.49 | 0.50  | 0.64  |
| Q15853 | Upstream stimulatory factor 2                                     | USF2     | 0.44 | 0.65 | 0.70  | -0.80 | -1.29 | -0.60 | 1.18  | -0.05 | -1.09 | -0.38 | 0.72  | 1.61  |
| Q9UJ70 | N-acetyl-D-glucosamine kinase                                     | NAGK     | 0.44 | 2.38 | -0.03 | -1.84 | 0.50  | 0.30  | -1.06 | 0.95  | -1.10 | 0.66  | 0.43  | 1.20  |
| P51784 | Ubiquitin carboxyl-terminal hydrolase 11                          | USP11    | 0.44 | 0.30 | 0.32  | -0.72 | -0.21 | -0.33 | 0.53  | 0.64  | -0.97 | 0.49  | -1.65 | 1.91  |
| P23193 | Transcription elongation factor A protein 1                       | TCEA1    | 0.44 | 0.67 | -0.95 | -0.16 | -1.33 | 1.04  | 0.57  | -1.03 | -1.00 | 0.78  | 0.89  | 1.20  |
| Q8N2G6 | Zinc finger CCHC domain-containing protein 24                     | ZCCHC24  | 0.44 | 2.23 | -0.12 | -0.22 | -0.86 | -0.18 | -0.78 | -0.56 | -0.20 | 0.74  | 2.55  | -0.38 |
| Q81YB7 | DIS3-like exonuclease 2                                           | DIS3L2   | 0.44 | 1.27 | -1.81 | 1.05  | -0.35 | 0.32  | -0.59 | 1.77  | -0.05 | -0.85 | 0.09  | 0.42  |
| Q9H2G4 | Testis-specific Y-encoded-like protein 2                          | TSPYL2   | 0.44 | 0.96 | -0.23 | -0.70 | 1.24  | -0.64 | -0.79 | -0.60 | -0.71 | 1.90  | 1.07  | -0.54 |
| P07339 | Cathepsin D                                                       | CTSD     | 0.44 | 0.72 | -0.44 | -0.57 | -0.73 | -1.02 | 1.88  | -0.84 | 0.92  | 1.06  | -0.71 | 0.45  |
| Q75150 | E3 ubiquitin-protein ligase BRE1B                                 | RNF40    | 0.44 | 0.31 | 1.07  | -1.02 | 0.23  | -0.81 | 0.10  | 2.14  | -0.22 | 0.15  | -1.03 | -0.61 |
| P23434 | Glycine cleavage system H protein, mitochondrial                  | GCSH     | 0.44 | 0.38 | -0.35 | -0.44 | 1.23  | -0.44 | -0.51 | -0.45 | -0.53 | 2.41  | -0.49 | -0.43 |
| Q15847 | Adipogenesis regulatory factor                                    | ADIRF    | 0.44 | 0.32 | -0.46 | -0.58 | -0.67 | -0.56 | 1.84  | -0.57 | 1.82  | 0.29  | -0.54 | -0.56 |
| Q96C24 | Synaptotagmin-like protein 4                                      | SYTL4    | 0.44 | 0.37 | 0.11  | 0.81  | -1.27 | 0.58  | -0.73 | 1.23  | -1.05 | -1.35 | 0.83  | 0.84  |
| Q75964 | ATP synthase subunit g, mitochondrial                             | ATP5MG   | 0.44 | 0.63 | 1.00  | -0.84 | 0.72  | -0.82 | -0.84 | 1.84  | 0.59  | -1.26 | -0.24 | -0.13 |
| Q13303 | Voltage-gated potassium channel subunit beta-2                    | KCNAB2   | 0.43 | 0.91 | 0.97  | 0.23  | 0.01  | -1.10 | -1.18 | -0.18 | 1.05  | 0.88  | -1.62 | 0.95  |
| O14929 | Histone acetyltransferase type B catalytic subunit                | HAT1     | 0.43 | 0.94 | 0.09  | -0.18 | -0.56 | -0.06 | -0.42 | -0.26 | -0.29 | -0.88 | -0.16 | 2.74  |
| Q06830 | Peroxiorexin-1                                                    | PRDX1    | 0.43 | 0.99 | -1.16 | -1.39 | 0.45  | -0.51 | 1.46  | 0.87  | -0.66 | 1.34  | -0.33 | -0.08 |
| Q9NPH2 | Inositol-3-phosphate synthase 1                                   | ISYNA1   | 0.43 | 0.40 | -0.97 | -0.08 | -0.40 | 0.41  | 0.50  | -1.01 | -1.09 | 2.25  | 0.42  | -0.03 |
| P62244 | 40S ribosomal protein S15a                                        | RPS15A   | 0.43 | 1.70 | -0.02 | -1.88 | 0.34  | 0.22  | -0.37 | 0.66  | -1.55 | 1.10  | 0.73  | 0.76  |
| Q6P2M8 | Calcium/calmodulin-dependent protein kinase type 1B               | PNCK     | 0.43 | 0.41 | 0.61  | -1.69 | 0.26  | 0.12  | 0.16  | 0.39  | 1.56  | 0.09  | 0.24  | -1.73 |
| P02774 | Vitamin D-binding protein                                         | GC       | 0.43 | 0.70 | 1.49  | -0.83 | -1.04 | 0.31  | -0.80 | 0.26  | 0.38  | 1.71  | -0.84 | -0.66 |
| Q9Y6D9 | Mitotic spindle assembly checkpoint protein MAD1                  | MAD1L1   | 0.43 | 0.70 | 1.12  | 0.16  | -2.19 | -0.14 | 0.18  | -0.30 | -0.21 | 1.63  | 0.02  | -0.28 |
| O43684 | Mitotic checkpoint protein BUB3                                   | BUB3     | 0.43 | 2.62 | -1.44 | 0.40  | -1.20 | -0.31 | 0.28  | 0.50  | -0.47 | -0.46 | 0.70  | 2.00  |
| P04259 | Keratin, type II cytoskeletal 6B                                  | KRT6B    | 0.43 | 0.72 | 0.22  | -1.33 | 0.47  | -1.18 | 0.93  | -0.36 | 0.18  | 1.84  | -1.04 | 0.25  |
| P00441 | Superoxide dismutase [Cu-Zn]                                      | SOD1     | 0.43 | 0.37 | -0.21 | 0.21  | 0.62  | -0.79 | -0.34 | -0.02 | -1.32 | 2.39  | -0.56 | 0.02  |
| Q2TAC6 | Kinesin-like protein KIF19                                        | KIF19    | 0.43 | 0.40 | 0.05  | -0.67 | -0.83 | 1.51  | -0.59 | -0.53 | -0.66 | -0.96 | 1.40  | 1.28  |
| O14986 | Phosphatidylinositol 4-phosphate 5-kinase type-1 beta             | PIPSKB1B | 0.43 | 0.73 | 0.70  | 1.00  | -0.94 | -0.76 | -0.89 | 0.84  | 0.26  | -1.09 | -0.76 | 1.64  |
| Q9HAB8 | Phosphopantothenate--cysteine ligase                              | PPCS     | 0.43 | 0.47 | -1.54 | 1.10  | -0.19 | -0.03 | 0.04  | 0.85  | 0.96  | -1.87 | 0.32  | 0.36  |
| P21291 | Cysteine and glycine-rich protein 1                               | CSRP1    | 0.43 | 1.20 | -0.26 | -0.11 | -1.95 | 0.59  | 0.41  | 1.09  | -1.25 | -0.37 | 0.83  | 1.02  |
| O43598 | 2'-deoxynucleoside 5'-phosphate N-hydrolase 1                     | DNPH1    | 0.43 | 0.40 | -0.72 | -0.86 | -0.98 | 0.91  | 1.12  | -0.82 | -0.24 | 1.51  | 0.95  | -0.88 |
| Q14765 | Signal transducer and activator of transcription 4                | STAT4    | 0.43 | 0.97 | 0.70  | -0.59 | -0.87 | 0.54  | -0.90 | 1.64  | 0.68  | -1.41 | 0.87  | -0.65 |
| Q9Y5S2 | Serine/threonine-protein kinase MRCK beta                         | CDC42BPB | 0.43 | 0.67 | 0.62  | 0.29  | -1.31 | 0.27  | -0.70 | 1.95  | 0.71  | -1.02 | 0.12  | -0.93 |
| P49407 | Beta-arrestin-1                                                   | ARRB1    | 0.43 | 1.20 | -1.30 | -1.12 | 0.84  | 0.84  | -0.58 | -0.60 | -0.72 | 1.73  | 0.60  | 0.32  |
| Q9UM22 | Mammalian ependymin-related protein 1                             | EPDR1    | 0.43 | 1.00 | 0.98  | -1.08 | -1.25 | -0.89 | 1.09  | 0.54  | 1.18  | 0.82  | -0.71 | -0.68 |
| P62993 | Growth factor receptor-bound protein 2                            | GRB2     | 0.43 | 1.12 | -0.48 | 0.40  | -0.47 | 0.21  | -0.94 | 0.25  | -1.67 | 2.03  | 0.71  | -0.03 |
| Q15034 | Probable E3 ubiquitin-protein ligase HERC3                        | HERC3    | 0.43 | 0.73 | 0.65  | -0.79 | -1.10 | 0.01  | 0.34  | 0.35  | 1.75  | -1.42 | 0.95  | -0.73 |
| Q72392 | Trafficking protein particle complex subunit 11                   | TRAPPC11 | 0.42 | 0.84 | 0.45  | 1.11  | -2.03 | 0.37  | -0.92 | 0.15  | 1.36  | -0.68 | -0.14 | 0.32  |
| P61586 | Transforming protein RhoA                                         | RHOA     | 0.42 | 1.87 | 0.21  | -0.12 | -0.12 | 0.34  | -2.13 | 1.88  | -0.69 | -0.02 | 0.41  | 0.24  |
| O95848 | Uridine diphosphate glucose pyrophosphatase NUDT14                | NUDT14   | 0.42 | 1.09 | 1.55  | 0.03  | -0.32 | -1.72 | -0.77 | 0.78  | -0.52 | 0.91  | 0.81  | -0.76 |
| P52565 | Rho GDP-dissociation inhibitor 1                                  | ARHGDI1A | 0.42 | 1.42 | -0.96 | 1.32  | -0.04 | 0.24  | -2.10 | 0.32  | 1.33  | -0.12 | 0.02  | -0.03 |
| P13489 | Ribonuclease inhibitor                                            | RNH1     | 0.42 | 1.35 | 0.21  | -0.45 | 0.56  | 0.75  | -2.55 | 0.76  | -0.31 | 0.08  | 0.84  | 0.12  |
| Q10567 | AP-1 complex subunit beta-1                                       | APIB1    | 0.42 | 1.98 | -0.38 | 0.87  | -0.58 | -0.21 | -1.59 | 1.12  | 1.17  | -1.41 | 0.33  | 0.69  |
| P05556 | Integrin beta-1                                                   | ITGB1    | 0.42 | 0.74 | 0.89  | 0.02  | -1.35 | 0.62  | -1.08 | 1.38  | 0.33  | 1.01  | -1.18 | -0.64 |
| P17026 | Zinc finger protein 22                                            | ZNF22    | 0.42 | 1.77 | 0.55  | -0.46 | -1.62 | 0.78  | -1.01 | -0.42 | -0.77 | 0.88  | 0.51  | 1.55  |
| Q9NZN5 | Rho guanine nucleotide exchange factor 12                         | ARHGEF12 | 0.42 | 1.73 | -1.84 | -0.02 | 0.32  | 0.05  | -0.24 | -1.28 | 0.92  | -0.12 | 0.60  | 1.61  |
| P13510 | Acid ceramidase                                                   | ASAH1    | 0.42 | 0.86 | -1.43 | -0.49 | -0.61 | 0.32  | 1.20  | -0.12 | -1.45 | 1.34  | 0.40  | 0.85  |
| B5ME19 | Eukaryotic translation initiation factor 3 subunit C-like protein | EIF3CL   | 0.42 | 1.02 | 0.13  | -0.12 | -0.71 | -0.08 | -0.43 | -0.28 | -0.26 | -0.86 | -0.10 | 2.72  |
| P12036 | Neurofilament heavy polypeptide                                   | NFHH     | 0.42 | 1.23 | -0.94 | -1.89 | 0.58  | -0.54 | 1.42  | 0.60  | -0.58 | 1.06  | 0.01  | 0.28  |
| P41252 | Isoleucine--tRNA ligase, cytoplasmic                              | IARS     | 0.42 | 2.45 | 0.21  | -0.82 | -1.76 | -0.03 | 0.22  | 0.56  | 1.27  | -0.89 | -0.29 | 1.53  |
| P22570 | NADPH:adrenodoxin oxidoreductase, mitochondrial                   | FDXR     | 0.42 | 0.53 | -0.28 | -0.72 | 2.12  | -1.14 | -0.68 | 0.73  | 1.01  | -0.43 | 0.00  | -0.63 |
| Q92973 | Transporthin-1                                                    | TNPO1    | 0.42 | 1.01 | -0.88 | -0.48 | -0.38 | 0.32  | 0.22  | 0.71  | -1.70 | -0.35 | 0.55  | 1.98  |
| P28066 | Proteasome subunit alpha type-5                                   | PSMA5    | 0.42 | 1.12 | -1.13 | -1.51 | -0.02 | 0.04  | 1.36  | -0.24 | -0.33 | 1.83  | 0.21  | -0.22 |
| P61201 | COP9 signalosome complex subunit 2                                | COPS2    | 0.42 | 0.68 | -1.14 | 1.37  | -1.77 | 0.82  | -0.14 | -0.50 | 0.98  | -0.55 | 0.64  | 0.29  |
| P52758 | 2-iminobutanate/2-iminopropanate deaminase                        | RIDA     | 0.42 | 0.41 | -0.85 | -0.75 | -0.53 | 0.85  | 0.74  | -0.85 | -1.51 | 1.42  | 0.91  | 0.57  |
| P62942 | Peptidyl-prolyl cis-trans isomerase FKBP1A                        | FKBP1A   | 0.42 | 1.17 | 0.46  | 0.44  | -1.38 | 0.11  | -0.94 | -1.37 | 1.28  | 1.19  | 0.74  | -0.54 |
| Q86VW0 | SEC14 domain and spectrin repeat-containing protein 1             | SESTD1   | 0.41 | 0.98 | 0.77  | -0.53 | 0.53  | -0.30 | -1.61 | 0.33  | 1.95  | -1.12 | 0.05  | -0.08 |
| P61247 | 40S ribosomal protein S3a                                         | RPS3A    | 0.41 | 0.78 | 1.06  | -0.85 | 0.56  | -0.35 | -1.36 | 1.18  | 0.32  | 0.98  | 0.01  | -1.55 |
| Q9NZD2 | Glycolipid transfer protein                                       | GLTP     | 0.41 | 0.44 | 0.72  | -1.02 | -1.19 | 0.56  | 0.35  | -0.25 | -1.03 | 2.08  | 0.12  | -0.34 |
| P57721 | Poly(rC)-binding protein 3                                        | PCBP3    | 0.41 | 0.75 | 0.91  | -2.06 | -0.89 | 0.52  | 0.60  | 0.81  | 0.11  | -1.08 | 0.32  | 0.75  |

|         |                                                                  |           |      |      |       |       |       |       |       |       |       |       |       |       |
|---------|------------------------------------------------------------------|-----------|------|------|-------|-------|-------|-------|-------|-------|-------|-------|-------|-------|
| P0DP04  | Immunoglobulin heavy variable 3-43D                              | IGHV3-43D | 0.41 | 0.38 | -1.18 | 0.49  | 0.47  | 0.39  | -0.69 | -1.26 | -1.28 | 1.23  | 0.64  | 1.18  |
| P21399  | Cytoplasmic aconitase hydratase                                  | ACO1      | 0.41 | 1.39 | -0.31 | 0.88  | -1.72 | 1.03  | -1.38 | -0.81 | 0.36  | 0.58  | 0.39  | 0.98  |
| P53041  | Serine/threonine-protein phosphatase 5                           | PPP5C     | 0.41 | 0.83 | 0.34  | -0.32 | -0.75 | 0.22  | -0.51 | -1.35 | 0.03  | 2.47  | -0.05 | -0.07 |
| P06060  | Myosin light polypeptide 6                                       | MYL6      | 0.41 | 2.20 | -0.91 | 1.72  | -1.38 | -0.79 | -0.73 | 0.77  | 0.38  | 0.12  | -0.32 | 1.14  |
| Q00796  | Sorbitol dehydrogenase                                           | SORD      | 0.41 | 1.01 | 0.89  | -0.42 | 0.91  | -0.70 | -1.84 | 1.67  | 0.08  | -0.39 | -0.52 | 0.32  |
| Q96P70  | Importin-9                                                       | IPO9      | 0.41 | 0.57 | 1.18  | -1.23 | -0.62 | 0.04  | -0.10 | 1.26  | -1.42 | 1.25  | 0.30  | -0.67 |
| Q07021  | Complement component 1 Q subcomponent-binding protein, mito      | C1QB8P    | 0.41 | 0.48 | 0.98  | -1.16 | -0.74 | -0.61 | 0.91  | 0.79  | -1.39 | 1.46  | -0.46 | 0.23  |
| Q9NP72  | Ras-related protein Rab-18                                       | RAB18     | 0.41 | 1.74 | -0.92 | 0.68  | 0.31  | 0.29  | -2.11 | -0.69 | 1.49  | 0.20  | 0.55  | 0.20  |
| Q14204  | Cytoplasmic dynein 1 heavy chain 1                               | DYNC1H1   | 0.41 | 0.87 | 0.54  | 0.35  | -1.52 | 0.57  | -0.98 | 1.57  | 0.26  | -1.45 | 0.62  | 0.04  |
| P53396  | ATP-citrate synthase                                             | ACLY      | 0.41 | 0.55 | -0.61 | -0.39 | 0.36  | -0.20 | 0.13  | -0.74 | -0.92 | -0.15 | -0.09 | 2.62  |
| Q6L8Q7  | 2',5'-phosphodiesterase 12                                       | PDE12     | 0.41 | 0.81 | 0.78  | 0.43  | -0.24 | 0.35  | -2.30 | 1.10  | 0.39  | -1.09 | 0.39  | 0.19  |
| Q96F63  | Coiled-coil domain-containing protein 97                         | CCDC97    | 0.41 | 0.75 | 1.29  | -0.53 | -0.74 | -0.37 | -0.56 | 2.14  | -0.53 | -0.80 | -0.46 | 0.57  |
| Q9NVP1  | ATP-dependent RNA helicase DDX18                                 | DDX18     | 0.41 | 0.81 | 0.27  | 0.37  | -1.05 | 0.28  | -0.86 | 0.57  | -0.89 | 1.77  | 0.90  | -1.36 |
| P49748  | Very long-chain specific acyl-CoA dehydrogenase, mitochondrial   | ACADVL    | 0.41 | 1.67 | -1.89 | -1.54 | 1.04  | 0.94  | -0.32 | 0.18  | -0.01 | 0.76  | 0.50  | 0.33  |
| Q8NBF2  | NHL repeat-containing protein 2                                  | NHLRC2    | 0.41 | 0.47 | -1.21 | 0.29  | 0.81  | 0.26  | -0.77 | 1.28  | 0.40  | -1.98 | 0.41  | 0.51  |
| P20618  | Proteasome subunit beta type-1                                   | PSMB1     | 0.41 | 1.05 | -0.97 | -1.43 | 0.31  | -0.10 | 0.99  | -0.62 | -0.61 | 2.02  | 0.31  | 0.10  |
| Q7RTV0  | PHD finger-like domain-containing protein 5A                     | PHF5A     | 0.40 | 1.33 | 0.92  | 0.98  | -1.93 | -0.32 | -1.10 | 0.52  | 0.18  | -0.54 | 0.04  | 1.26  |
| Q9Y6C9  | Mitochondrial carrier homolog 2                                  | MTCH2     | 0.40 | 3.75 | 0.23  | -0.69 | -1.05 | -0.27 | -1.09 | -0.20 | -0.16 | 1.87  | -0.22 | 1.58  |
| Q12860  | Contactin-1                                                      | CNTN1     | 0.40 | 1.38 | -0.35 | 0.53  | -0.84 | -0.08 | -0.77 | -1.41 | 0.70  | 2.06  | 0.60  | -0.44 |
| Q96HY6  | DDRKG domain-containing protein 1                                | DDRKG1    | 0.40 | 0.40 | 0.77  | 0.64  | -1.35 | 0.64  | -1.23 | 0.49  | 0.10  | -1.63 | 0.54  | 1.03  |
| Q02543  | 60S ribosomal protein L18a                                       | RPL18A    | 0.40 | 1.08 | -0.25 | -1.87 | -1.06 | 0.11  | 1.80  | 0.01  | 0.40  | -0.27 | 0.24  | 0.89  |
| Q03591  | Complement factor H-related protein 1                            | CFHR1     | 0.40 | 0.44 | 1.10  | -0.21 | -1.34 | 0.36  | -0.49 | 0.79  | 0.62  | -1.76 | -0.26 | 1.19  |
| Q95502  | Neuronal pentraxin receptor                                      | NPTXR     | 0.40 | 1.19 | 0.67  | 0.50  | -0.93 | -0.40 | -1.16 | 1.53  | -0.42 | 1.40  | 0.02  | -1.21 |
| P21359  | Neurofibromin                                                    | NF1       | 0.40 | 0.73 | 0.70  | -0.17 | -1.21 | 0.68  | -0.88 | 1.16  | 1.40  | -0.82 | 0.43  | -1.27 |
| Q9POL0  | Vesicle-associated membrane protein-associated protein A         | VAPA      | 0.40 | 1.67 | 0.55  | -0.19 | -1.32 | 0.06  | -0.81 | -0.12 | 1.75  | 1.43  | -0.35 | -1.01 |
| Q43426  | Synaptotagmin-1                                                  | SYNJ1     | 0.40 | 3.77 | -0.77 | -0.76 | -0.73 | -0.69 | -0.05 | 1.37  | 2.11  | -0.15 | 0.30  | -0.62 |
| P24666  | Low molecular weight phosphotyrosine protein phosphatase         | ACP1      | 0.40 | 0.92 | -0.53 | -0.92 | 0.39  | -1.00 | 0.97  | -1.50 | 0.24  | 1.55  | -0.23 | 1.02  |
| Q06278  | Aldehyde oxidase                                                 | AOX1      | 0.39 | 1.01 | -0.20 | -0.68 | 0.92  | -0.41 | -0.80 | 0.28  | -0.43 | 2.43  | -0.71 | -0.40 |
| Q567U6  | Coiled-coil domain-containing protein 93                         | CCDC93    | 0.39 | 0.74 | -0.46 | 1.41  | -0.27 | 0.56  | -2.16 | 0.86  | 0.52  | -0.82 | 0.10  | 0.25  |
| Q5JSH3  | WD repeat-containing protein 44                                  | WDR44     | 0.39 | 1.14 | 1.29  | -0.60 | -0.77 | -0.08 | -1.11 | 0.68  | 1.97  | -0.77 | -0.27 | -0.35 |
| Q96S15  | GATOR complex protein WDR24                                      | WDR24     | 0.39 | 0.96 | 0.03  | -0.38 | -0.52 | -0.04 | -0.24 | -0.35 | -0.25 | -0.71 | -0.31 | 2.78  |
| P50225  | Sulfotransferase 1A1                                             | SULT1A1   | 0.39 | 0.60 | -1.09 | 0.54  | -0.85 | 0.94  | -0.30 | 0.20  | -1.74 | 0.03  | 0.83  | 1.44  |
| O00186  | Syntaxin-binding protein 3                                       | STXB3P3   | 0.39 | 0.84 | 1.59  | -0.51 | -1.10 | 0.05  | -1.04 | 1.23  | 0.98  | -1.21 | 0.06  | -0.05 |
| P31930  | Cytochrome b-c1 complex subunit 1, mitochondrial                 | UQCRC1    | 0.39 | 0.86 | 0.35  | -0.21 | 0.42  | -0.17 | -1.42 | 1.33  | 1.38  | -1.71 | -0.03 | 0.06  |
| Q96BP3  | Peptidylprolyl isomerase domain and WD repeat-containing protein | PPWD1     | 0.39 | 0.75 | 0.30  | 1.13  | -0.71 | -1.54 | -0.10 | 0.58  | -1.70 | 0.37  | 0.73  | 0.93  |
| Q9H4G4  | Golgi-associated plant pathogenesis-related protein 1            | GLIPR2    | 0.39 | 0.87 | 0.33  | -0.12 | -0.59 | -2.10 | 1.43  | 0.90  | -0.08 | -0.80 | 0.72  | 0.31  |
| P52735  | Guanine nucleotide exchange factor VAV2                          | VAV2      | 0.39 | 0.56 | 1.58  | -0.48 | -0.68 | -0.50 | -0.63 | 1.34  | -0.50 | -0.92 | -0.59 | 1.38  |
| O60216  | Double-strand-break repair protein rad21 homolog                 | RAD21     | 0.39 | 0.90 | 1.15  | -1.26 | -1.25 | 0.29  | 0.02  | 1.75  | 0.43  | -1.08 | 0.06  | -0.11 |
| Q9Y5V3  | Melanoma-associated antigen D1                                   | MAGED1    | 0.39 | 0.88 | 0.86  | 0.21  | 0.07  | -0.36 | -1.81 | 0.56  | 0.93  | -1.58 | 0.05  | 1.08  |
| Q9UGR2  | Zinc finger CCHC domain-containing protein 7B                    | ZC3H7B    | 0.39 | 0.65 | 1.46  | -0.52 | -2.01 | 0.25  | -0.01 | 0.77  | 1.14  | -0.63 | 0.01  | -0.46 |
| Q9GXC2  | BTB/POZ domain-containing protein KCTD12                         | KCTD12    | 0.39 | 3.30 | -0.72 | 0.36  | 0.13  | -0.19 | -2.20 | 0.42  | 0.68  | 1.33  | 0.81  | -0.61 |
| Q92541  | RNA polymerase-associated protein RTF1 homolog                   | RTF1      | 0.38 | 0.55 | -0.40 | -0.48 | 1.35  | -0.54 | -0.64 | -0.47 | 2.17  | -0.88 | -0.50 | 0.39  |
| Q9UL15  | BAG family molecular chaperone regulator 5                       | BAG5      | 0.38 | 0.45 | -1.55 | -0.63 | 0.29  | 0.17  | 1.13  | -1.74 | 0.64  | 1.11  | 0.36  | 0.22  |
| Q9BYV8  | Centrosomal protein of 41 kDa                                    | CEP41     | 0.38 | 0.66 | 1.40  | 0.64  | -1.76 | -1.52 | 0.40  | -0.22 | 0.67  | 0.22  | 0.59  | -0.41 |
| P62256  | Ubiquitin-conjugating enzyme E2 H                                | UBE2H     | 0.38 | 0.64 | 0.39  | 0.08  | -0.76 | 0.58  | -1.10 | 1.33  | -0.26 | -1.87 | 0.63  | 0.97  |
| P42025  | Beta-centractin                                                  | ACTR1B    | 0.38 | 0.90 | -0.29 | 0.38  | -0.58 | -0.19 | -0.40 | -1.36 | -0.20 | 2.50  | 0.28  | -0.14 |
| O60343  | TBC1 domain family member 4                                      | TBC1D4    | 0.38 | 0.81 | -1.12 | -1.20 | 0.25  | 0.97  | 0.13  | -0.23 | -1.59 | 0.99  | 1.13  | 0.68  |
| P04406  | Glyceraldehyde 3-phosphate dehydrogenase                         | GAPDH     | 0.38 | 0.65 | -0.99 | -0.83 | 0.38  | 0.94  | -0.31 | -0.05 | -1.34 | 1.76  | 1.01  | -0.56 |
| Q86TN4  | tRNA 2'-phosphotransferase 1                                     | TRPT1     | 0.38 | 0.45 | 0.64  | -0.81 | -0.94 | 1.37  | -0.86 | 0.29  | -0.72 | -1.19 | 1.14  | 1.06  |
| Q9H4M9  | BH domain-containing protein 1                                   | BHD1      | 0.38 | 0.40 | -2.27 | 1.54  | 0.15  | 0.24  | -0.20 | -0.71 | 0.32  | -0.24 | 0.54  | 0.63  |
| Q75891  | Cytosolic 10-formyltetrahydrofolate dehydrogenase                | ALDH1L1   | 0.38 | 0.66 | -1.13 | -1.97 | 0.58  | 0.08  | 1.59  | 0.02  | -0.42 | 0.09  | 0.32  | 0.84  |
| O14966  | Ras-related protein Rab-7L1                                      | RAB29     | 0.38 | 0.67 | 0.05  | -0.23 | -0.55 | 0.64  | -0.76 | 1.26  | -1.62 | -0.93 | 0.68  | 1.46  |
| Q02978  | Mitochondrial 2-oxoglutarate/malate carrier protein              | SLC25A11  | 0.38 | 0.72 | 1.83  | -0.41 | -0.95 | -0.85 | -0.51 | -0.59 | -0.43 | -0.46 | 1.32  | 1.05  |
| O60888  | Protein CutA                                                     | CUTA      | 0.38 | 0.28 | -0.61 | -0.74 | 0.93  | -0.68 | 0.71  | -0.66 | -0.73 | 2.15  | -0.72 | 0.35  |
| Q9H9C1  | Spermatogenesis-defective protein 39 homolog                     | VIPAS39   | 0.38 | 1.20 | -0.32 | 1.57  | -0.94 | -0.37 | -1.27 | -0.41 | 1.78  | -0.32 | -0.29 | 0.55  |
| Q9Y6U3  | Adseverin                                                        | SCIN      | 0.38 | 0.55 | -0.18 | -0.20 | -1.82 | -0.33 | 1.83  | 1.16  | -0.39 | -0.19 | -0.48 | 0.61  |
| Q7Z3D6  | D-glutamate cyclase, mitochondrial                               | DGLUCY    | 0.38 | 0.32 | -1.12 | 0.41  | 1.30  | 0.25  | -1.26 | -0.32 | 0.71  | -1.52 | 0.58  | 0.99  |
| Q8N0W3  | L-fucose kinase                                                  | FCSK      | 0.38 | 0.65 | -0.03 | -0.91 | -0.10 | 0.80  | -0.58 | 0.35  | -1.86 | 1.86  | 0.37  | 0.10  |
| Q9NRY5  | Protein FAM114A2                                                 | FAM114A2  | 0.38 | 0.54 | -0.92 | 1.22  | 0.12  | -0.36 | -0.75 | 0.13  | -1.42 | -1.78 | 0.07  | 0.86  |
| Q68E01  | Integrator complex subunit 3                                     | INTS3     | 0.38 | 0.55 | 0.63  | -1.12 | -0.54 | -0.27 | 0.59  | 2.00  | 0.89  | -0.32 | -0.98 | -0.89 |
| Q9H4A4  | Aminopeptidase B                                                 | RNPEP     | 0.37 | 0.65 | -1.61 | 0.49  | 0.79  | -0.01 | -0.48 | 0.83  | -1.86 | 0.50  | 0.60  | 0.74  |
| Q9Y371  | Endophilin-B1                                                    | SH3GLB1   | 0.37 | 0.55 | -0.09 | 1.30  | -2.29 | 0.69  | -0.33 | 0.40  | -0.22 | -0.68 | 0.72  | 0.50  |
| Q9UBF2  | Coatmer subunit gamma-2                                          | COPG2     | 0.37 | 0.68 | -1.69 | -0.17 | -0.35 | 0.56  | 0.80  | -1.48 | -0.34 | 0.99  | 1.25  | 0.43  |
| Q8N9F0  | N-acetylglutamate synthetase                                     | NAT8L     | 0.37 | 0.40 | 0.36  | 1.23  | -1.33 | 0.56  | -1.35 | 0.36  | 0.29  | -1.51 | 0.66  | 0.73  |
| A043242 | 26S proteasome non-ATPase regulatory subunit 3                   | PSMD3     | 0.37 | 0.56 | 0.94  | -1.54 | 0.27  | -0.81 | 0.43  | -0.33 | 1.87  | 0.35  | -1.05 | -0.12 |
| Q9BT40  | Inositol polyphosphate 5-phosphatase K                           | INPP5K    | 0.37 | 0.60 | 0.88  | 0.66  | -1.75 | 0.30  | -0.85 | 0.74  | 0.39  | -1.48 | 0.09  | 1.01  |
| A1L390  | Pleckstrin homology domain-containing family G member 3          | PLEKHG3   | 0.37 | 0.83 | 0.04  | -0.12 | -0.48 | -0.28 | -0.19 | -0.31 | -0.24 | -1.03 | -0.13 | 2.72  |
| P63244  | Receptor of activated protein C kinase 1                         | RACK1     | 0.37 | 2.40 | -0.87 | -2.38 | -0.01 | 0.83  | 0.19  | 0.46  | 1.07  | 0.22  | 0.63  | -0.15 |
| P13987  | CD59 glycoprotein                                                | CD59      | 0.37 | 1.34 | 0.11  | 1.45  | -2.14 | -0.27 | -0.61 | -0.22 | -0.11 | 0.70  | -0.04 | 1.14  |
| P63302  | Selenoprotein W                                                  | SELENOW   | 0.37 | 0.78 | 0.93  | -0.24 | -2.21 | 0.49  | 0.09  | 0.97  | 1.04  | -0.97 | -0.08 | -0.01 |
| Q5VU43  | Myomegalin                                                       | PDE4DIP   | 0.37 | 0.62 | -1.05 | -1.19 | -0.21 | 0.60  | 1.07  | -1.25 | -0.49 | 1.65  | 0.43  | 0.44  |
| O00541  | Pescadillo homolog                                               | PES1      | 0.37 | 0.53 | -0.97 | 0.00  | -1.33 | 0.69  | 0.93  | -0.32 | 1.09  | -1.56 | 0.44  | 1.01  |
| O60504  | Vinexin                                                          | SORBS3    | 0.37 | 0.36 | 1.71  | -0.01 | -0.90 | 0.37  | -1.66 | -0.39 | 0.75  | -1.00 | 0.48  | 0.65  |
| Q76013  | Keratin, type I cuticular Ha6                                    | KRT36     | 0.37 | 0.64 | 1.33  | 0.93  | -1.71 | -0.82 | -0.53 | 0.04  | 0.04  | 1.34  | -0.80 | 0.18  |
| Q05639  | Blongation factor 1-alpha 2                                      | EEF1A2    | 0.37 | 1.10 | -0.01 | -0.34 | -1.25 | 0.55  | -0.20 | 1.59  | -0.25 | -1.71 | 0.54  | 1.09  |
| Q13617  | Cullin-2                                                         | CUL2      | 0.37 | 1.15 | 0.54  | -0.97 | -1.43 | 1.04  | -0.45 | -0.35 | 1.90  | -0.12 | 0.51  | -0.65 |
| P36405  | ADP-ribosylation factor-like protein 3                           | ARL3      | 0.37 | 1.89 | -0.53 | 0.05  | -0.19 | -0.01 | -1.21 | 1.88  | 0.79  | -1.62 | 0.25  | 0.60  |
| O95834  | Echinoderm microtubule-associated protein-like 2                 | EMIL2     | 0.37 | 0.65 | 0.35  | -0.99 | 1.78  | -0.91 | -1.04 | 0.61  | 0.00  | 1.34  | -0.57 | -0.56 |
| P59665  | Neutrophil defensin 1                                            | DEFA1     | 0.37 | 0.32 | 0.81  | -1.50 | -0.60 | -0.58 | 1.43  | 0.29  | -1.45 | 0.58  | 0.11  | 0.90  |
| Q14847  | LIM and SH3 domain protein 1                                     | LASP1     | 0.37 | 0.68 | 0.50  | 1.24  | -2.40 | -0.41 | 0.21  | -0.44 | 0.70  | 0.61  | -0.33 | 0.32  |
| Q15370  | Blongin-B                                                        | EL0B      | 0.37 | 1.12 | -0.02 | 0.39  | -1.51 | 0.34  | -0.46 | 1.03  | 0.92  | -1.90 | 0.65  | 0.56  |
| Q06210  | Glutamine-fructose-6-phosphate aminotransferase [isomerizing]    | GFPT1     | 0.37 | 0.36 | 0.89  | -0.13 | 0.33  | -1.60 | 0.01  | 0.94  | 0.65  | -1.93 | 0.69  | 0.13  |
| O15068  | Guanine nucleotide exchange factor DBS                           | MCF2L     | 0.37 | 0.69 | 0.14  | 0.10  | -0.62 | 1.38  | -1.87 | -0.80 | -0.39 | -0.02 | 1.37  | 0.70  |

|         |                                                                   |          |      |      |       |       |       |       |       |       |       |       |       |       |
|---------|-------------------------------------------------------------------|----------|------|------|-------|-------|-------|-------|-------|-------|-------|-------|-------|-------|
| P06753  | Tropomyosin alpha-3 chain                                         | TPM3     | 0.37 | 0.57 | -1.29 | 0.75  | -0.24 | -0.24 | 0.29  | -0.31 | 0.01  | 2.35  | -0.43 | -0.89 |
| Q8NBQ5  | Estradiol 17-beta-dehydrogenase 11                                | HSD17B11 | 0.37 | 0.43 | -0.80 | 1.28  | -0.66 | 0.80  | -1.20 | 0.50  | -0.21 | -1.42 | 1.32  | 0.37  |
| P27338  | Amine oxidase [flavin-containing] B                               | MAOB     | 0.37 | 0.88 | -0.87 | -0.79 | 0.90  | 0.61  | -0.89 | 0.81  | -1.77 | 0.17  | 1.18  | 0.65  |
| Q76054  | SEC14-like protein 2                                              | SEC14L2  | 0.37 | 0.59 | -0.32 | 0.44  | -0.35 | 0.18  | -0.71 | 1.46  | -0.21 | -2.06 | 0.35  | 1.23  |
| Q6MZT1  | Regulator of G-protein signaling 7-binding protein                | RGS7BP   | 0.37 | 1.30 | 0.09  | -0.31 | -0.64 | -0.07 | -0.52 | 0.10  | -0.13 | -1.03 | -0.14 | 2.66  |
| P78417  | Glutathione S-transferase omega-1                                 | GSTO1    | 0.37 | 0.39 | -1.32 | -1.25 | 2.04  | 0.39  | -0.39 | -0.57 | -0.26 | 0.74  | 0.53  | 0.09  |
| O60749  | Sorting nexin-2                                                   | SNX2     | 0.37 | 1.27 | -1.92 | 0.84  | 0.60  | 0.40  | -1.31 | 0.50  | 0.49  | -0.82 | 1.11  | 0.12  |
| P19823  | Inter-alpha-trypsin inhibitor heavy chain H2                      | ITI1H2   | 0.37 | 0.39 | -0.61 | -0.97 | 0.98  | 0.72  | -0.65 | 0.93  | 0.45  | 1.43  | -1.24 | -1.05 |
| S50238  | Cysteine-rich protein 1                                           | CRIP1    | 0.37 | 1.19 | 0.16  | -0.20 | -0.65 | -0.32 | -0.35 | -0.04 | -0.09 | -0.82 | -0.41 | 2.73  |
| Q9NWH9  | SAFB-like transcription modulator                                 | SLTM     | 0.37 | 0.98 | 1.58  | -0.07 | 0.11  | -1.20 | -1.56 | 1.13  | -0.73 | 0.88  | -0.01 | -0.12 |
| Q8WVX19 | Transcriptional repressor p66-beta                                | GATAD2B  | 0.37 | 0.61 | 1.63  | -1.27 | -0.13 | -0.13 | -0.88 | 1.04  | 0.86  | 0.58  | -0.48 | -1.24 |
| Q460N5  | Protein mono-ADP-ribosyltransferase PARP14                        | PARP14   | 0.36 | 0.58 | -0.07 | 0.56  | -0.84 | -0.06 | -0.35 | 0.95  | 2.19  | -1.19 | -0.71 | -0.48 |
| Q9Y265  | RuvB-like 1                                                       | RUVBL1   | 0.36 | 1.67 | 0.02  | -0.75 | -1.40 | -0.84 | 1.29  | -0.67 | 1.22  | 1.13  | -0.67 | 0.67  |
| P62495  | Eukaryotic peptide chain release factor subunit 1                 | ETF1     | 0.36 | 0.67 | -1.21 | -0.14 | 0.60  | 0.83  | -0.90 | -1.65 | -0.32 | 0.55  | 1.22  | 1.02  |
| Q6WVCQ1 | Myosin phosphatase Rho-interacting protein                        | MPRI1    | 0.36 | 1.24 | -0.30 | -1.19 | 1.00  | -0.40 | -0.49 | 0.45  | -0.95 | 2.18  | 0.14  | -0.45 |
| Q14966  | Zinc finger protein 638                                           | ZNF638   | 0.36 | 0.26 | 0.53  | 0.66  | -1.82 | 0.13  | 0.14  | 0.26  | 0.62  | 1.16  | 0.10  | -1.78 |
| O43837  | Isocitrate dehydrogenase [NAD] subunit beta, mitochondrial        | IDH3B    | 0.36 | 0.87 | 0.55  | -1.06 | 1.67  | -0.91 | -1.29 | 1.15  | 0.69  | 0.08  | -0.68 | -0.19 |
| O75995  | SAM and SH3 domain-containing protein 3                           | SASH3    | 0.36 | 0.38 | -0.64 | 0.90  | -0.90 | 0.86  | -0.74 | -0.65 | -0.77 | 1.96  | 0.62  | -0.65 |
| Q6ZM10  | Protein phosphatase 1 regulatory subunit 21                       | PPP1R21  | 0.36 | 0.42 | -1.32 | 0.82  | 0.03  | 0.44  | -0.52 | 0.44  | 1.49  | -1.88 | 0.29  | 0.21  |
| P20962  | Parathyroid hormone                                               | PTMS     | 0.36 | 0.56 | 0.11  | 0.64  | -1.98 | -0.21 | 0.73  | 0.27  | 1.24  | 0.83  | -0.33 | -1.30 |
| Q9UBF6  | RING-box protein 2                                                | RNF7     | 0.36 | 0.30 | 0.32  | 0.33  | -1.92 | 0.57  | 0.28  | 0.48  | -1.84 | 0.65  | 0.67  | 0.46  |
| P60842  | Eukaryotic initiation factor 4A-1                                 | EIF4A1   | 0.36 | 1.29 | 0.57  | -0.65 | -0.15 | 0.62  | -1.79 | 1.08  | 0.09  | -1.42 | 0.59  | 1.06  |
| P16333  | Cytoplasmic protein NCK1                                          | NCK1     | 0.36 | 0.36 | 0.36  | 0.95  | -1.90 | 0.88  | -0.77 | 0.65  | -0.95 | -0.72 | 0.81  | 0.70  |
| Q9UG56  | Phosphatidylserine decarboxylase proenzyme, mitochondrial         | PLSD     | 0.36 | 0.58 | 0.76  | 1.37  | -1.02 | -0.23 | -1.62 | -0.45 | 0.92  | -0.57 | -0.30 | 1.15  |
| P07197  | Neurofilament medium polypeptide                                  | NEFM     | 0.36 | 1.62 | -0.38 | -0.17 | 1.40  | -0.94 | -1.57 | 0.41  | 0.53  | 1.57  | -0.80 | -0.05 |
| Q13625  | Apoptosis-stimulating of p53 protein 2                            | TP53BP2  | 0.36 | 0.47 | 0.12  | -1.66 | 1.28  | 0.06  | -0.42 | 1.09  | -1.58 | 0.01  | 0.31  | 0.79  |
| P38646  | Stress-70 protein, mitochondrial                                  | HSPA9    | 0.36 | 0.67 | -1.14 | 0.06  | 1.86  | -1.46 | -0.17 | -0.78 | 0.78  | 0.41  | -0.33 | 0.76  |
| Q9UIC8  | Leucine carboxyl methyltransferase 1                              | LCMT1    | 0.36 | 0.56 | -1.16 | -0.39 | -0.88 | 0.75  | 0.97  | -0.89 | -1.28 | 1.04  | 0.85  | 1.00  |
| Q05397  | Focal adhesion kinase 1                                           | PTK2     | 0.36 | 1.09 | -0.12 | -0.07 | 1.30  | -1.14 | -1.20 | -0.65 | 0.89  | 1.74  | -0.52 | -0.24 |
| Q9UEY8  | Gamma-adducin                                                     | ADD3     | 0.36 | 1.31 | -0.56 | -1.34 | -0.68 | 0.58  | 0.57  | 0.30  | -1.45 | 1.74  | 0.73  | 0.10  |
| Q13232  | Nucleoside diphosphate kinase 3                                   | NME3     | 0.36 | 0.44 | 0.26  | 0.68  | -1.66 | 0.11  | 0.01  | 0.87  | 0.01  | -1.86 | 1.15  | 0.41  |
| Q9HBH5  | Retinol dehydrogenase 14                                          | RDH14    | 0.35 | 0.54 | -0.29 | 1.61  | -0.87 | -0.51 | -0.64 | -0.47 | 1.52  | -0.92 | -0.54 | 1.11  |
| Q92994  | Transcription factor IIIB 90 kDa subunit                          | BRF1     | 0.35 | 0.60 | 0.87  | -0.26 | -0.62 | -0.25 | -0.49 | -0.37 | 2.54  | -0.83 | -0.22 | -0.36 |
| Q99584  | Protein S100-A13                                                  | S100A13  | 0.35 | 0.71 | 0.03  | -1.49 | -1.49 | 0.16  | 1.89  | 0.12  | 0.16  | 0.66  | 0.46  | -0.50 |
| Q9Y646  | Carboxypeptidase Q                                                | CPQ      | 0.35 | 0.46 | 0.51  | 0.96  | -0.79 | -0.07 | -1.22 | 0.27  | -0.99 | 2.08  | -0.55 | -0.21 |
| P50750  | Cyclin-dependent kinase 9                                         | CDK9     | 0.35 | 0.59 | 1.41  | -0.37 | -0.81 | -0.53 | -0.44 | -0.43 | -0.56 | -0.10 | -0.41 | 2.25  |
| Q9BQ3   | Golgi reassembly-stacking protein 1                               | GORASP1  | 0.35 | 0.30 | 0.63  | -1.04 | -1.21 | 0.87  | 0.33  | 0.99  | -1.09 | -1.22 | 0.95  | 0.79  |
| P83881  | 60S ribosomal protein L36a                                        | RPL36A   | 0.35 | 1.58 | 0.18  | -2.50 | 0.00  | 0.48  | 0.19  | -0.33 | -0.06 | 0.13  | 0.46  | 1.45  |
| Q12913  | Receptor-type tyrosine-protein phosphatase eta                    | PTPRJ    | 0.35 | 0.47 | -0.60 | 1.64  | -0.97 | 0.15  | -0.84 | -0.74 | 1.17  | -1.18 | 0.52  | 0.84  |
| O00308  | NEDD4-like E3 ubiquitin-protein ligase WWP2                       | WWP2     | 0.35 | 0.39 | 0.22  | 0.17  | -0.54 | 0.72  | -1.10 | -0.19 | 1.38  | -1.86 | -0.03 | 1.23  |
| Q5T9A4  | ATPase family AAA domain-containing protein 3B                    | ATAD3B   | 0.35 | 0.25 | 1.19  | -1.04 | 0.74  | -0.17 | -1.07 | 1.17  | 1.21  | -1.29 | -0.44 | -0.31 |
| P07858  | Cathepsin B                                                       | CTSB     | 0.35 | 0.54 | -0.42 | -0.33 | 0.17  | -1.34 | 1.24  | -0.43 | 0.84  | 1.41  | -1.52 | 0.40  |
| Q9ULC4  | Malignant T-cell-amplified sequence 1                             | MCTS1    | 0.35 | 0.89 | 0.57  | 0.48  | -0.14 | 0.23  | -2.19 | 0.38  | 1.59  | -0.90 | 0.21  | -0.23 |
| P80404  | 4-aminobutyrate aminotransferase, mitochondrial                   | ABAT     | 0.35 | 0.84 | 0.03  | -0.94 | -0.63 | 0.06  | 0.46  | -0.23 | -0.68 | 2.57  | -0.03 | -0.62 |
| P62826  | GTP-binding nuclear protein Ran                                   | RAN      | 0.35 | 0.88 | 1.35  | -0.55 | -0.81 | -0.75 | -0.29 | 0.90  | 1.85  | -1.03 | -0.20 | -0.48 |
| P07602  | Prosaposin                                                        | PSAP     | 0.35 | 0.45 | 0.15  | -1.12 | -1.09 | -0.64 | 2.10  | -0.66 | 0.88  | 0.45  | -0.44 | 0.37  |
| Q9Y2V2  | Calcium-regulated heat-stable protein 1                           | CARHSP1  | 0.35 | 1.30 | 0.20  | -0.73 | -0.87 | 1.44  | -1.45 | 1.28  | 0.23  | -0.72 | 1.04  | -0.43 |
| Q8N910  | Synaptotagmin-2                                                   | SYT2     | 0.35 | 0.40 | 0.65  | -0.36 | 0.24  | 0.16  | -1.23 | 1.31  | -1.85 | -0.43 | 0.34  | 1.17  |
| Q81WX8  | Calcium homeostasis endoplasmic reticulum protein                 | CHERP    | 0.35 | 0.38 | 1.38  | -1.14 | -1.30 | 0.19  | 0.36  | 1.13  | -0.05 | -1.46 | 0.68  | 0.22  |
| P46779  | 60S ribosomal protein L28                                         | RPL28    | 0.35 | 0.50 | -0.17 | -2.11 | -0.10 | -0.17 | 1.88  | 0.66  | 0.26  | -0.54 | -0.07 | 0.35  |
| Q9Y2T3  | Guanine deaminase                                                 | GDA      | 0.34 | 0.68 | -0.60 | 0.04  | -0.42 | 0.53  | -0.41 | -1.03 | 0.68  | 2.01  | 0.63  | -1.43 |
| P62879  | Guanine nucleotide-binding protein G(I)/G(S)/G(T) subunit beta-2  | GNB2     | 0.34 | 1.60 | -1.07 | 0.81  | -1.50 | 0.50  | -0.38 | 0.81  | 0.52  | -1.43 | 0.66  | 1.08  |
| O15254  | Peroxisomal acyl-coenzyme A oxidase 3                             | ACOX3    | 0.34 | 1.50 | 0.31  | -0.36 | -0.82 | -0.18 | -0.57 | -0.22 | -0.44 | 2.72  | -0.09 | -0.35 |
| Q8WUJ8  | Cotranscriptional regulator FAM172A                               | FAM172A  | 0.34 | 0.98 | 0.27  | -0.33 | -0.53 | -0.18 | -0.41 | 2.71  | -0.19 | -0.95 | -0.21 | -0.18 |
| Q32M24  | Leucine-rich repeat flightless-interacting protein 1              | LRRFIP1  | 0.34 | 0.87 | -0.42 | 1.78  | -1.13 | -0.59 | -0.67 | -0.77 | 1.40  | 0.47  | -0.67 | 0.62  |
| Q15833  | Syntaxin-binding protein 2                                        | STXB2    | 0.34 | 0.46 | 1.45  | -0.83 | 0.81  | -0.19 | -1.84 | 0.50  | 1.09  | -0.69 | -0.44 | 0.15  |
| P61160  | Actin-related protein 2                                           | ACTR2    | 0.34 | 0.39 | 0.79  | 0.79  | -1.20 | 0.21  | -1.10 | 0.93  | 1.55  | -1.18 | -0.17 | -0.61 |
| P60763  | Ras-related C3 botulinum toxin substrate 3                        | RAC3     | 0.34 | 0.36 | 0.63  | 1.22  | 0.07  | 0.12  | -2.53 | -0.28 | 0.61  | -0.30 | 0.09  | 0.37  |
| Q00325  | Phosphate carrier protein, mitochondrial                          | SLC25A3  | 0.34 | 0.47 | 0.70  | 0.71  | -1.73 | 0.37  | -0.66 | 0.83  | 0.78  | -1.50 | 0.88  | -0.37 |
| P63092  | Guanine nucleotide-binding protein G(s) subunit alpha isoforms st | GNAS     | 0.34 | 1.53 | -0.77 | 0.90  | -0.79 | 0.48  | -1.40 | 1.06  | -0.60 | -0.99 | 1.23  | 0.89  |
| P17931  | Galectin-3                                                        | LGALS3   | 0.34 | 1.42 | 0.62  | 0.38  | -2.10 | 0.39  | -0.80 | 1.19  | 0.17  | -0.88 | 1.02  | 0.01  |
| Q9NZM4  | BH domain-containing protein 2                                    | BHD2     | 0.34 | 0.59 | -0.88 | 0.69  | 0.74  | 0.09  | -1.39 | -1.20 | 0.10  | -0.44 | 0.46  | 1.85  |
| P15328  | Folate receptor alpha                                             | FOLR1    | 0.34 | 0.37 | 1.70  | -0.47 | -0.67 | -0.54 | -0.50 | 1.05  | -0.57 | -0.92 | -0.57 | 1.51  |
| P26639  | Threonine--tRNA ligase, cytoplasmic                               | TARS     | 0.34 | 0.63 | -2.25 | 0.00  | 1.43  | 0.10  | -0.09 | 0.45  | -0.93 | 0.10  | 0.34  | 0.82  |
| Q15746  | Myosin light chain kinase, smooth muscle                          | MYLK     | 0.34 | 0.63 | -1.14 | 0.35  | -0.36 | 1.47  | -1.10 | 0.56  | -0.30 | -1.36 | 1.12  | 0.77  |
| P15374  | Ubiquitin carboxyl-terminal hydrolase isozyme L3                  | UCHL3    | 0.33 | 0.87 | -0.94 | 1.80  | -0.17 | 0.24  | -1.99 | -0.24 | 0.35  | -0.15 | 0.48  | 0.62  |
| Q1KMD3  | Heterogeneous nuclear ribonucleoprotein U-like protein 2          | HNRNPUL2 | 0.33 | 0.56 | 1.18  | -1.01 | -1.57 | 0.44  | 0.25  | 1.32  | 0.26  | -1.37 | 0.46  | 0.04  |
| P23588  | Eukaryotic translation initiation factor 4B                       | EIF4B    | 0.33 | 0.63 | 0.84  | 0.71  | -0.03 | -0.50 | -1.82 | 0.97  | 1.15  | -0.74 | -1.09 | 0.50  |
| Q9UL26  | Ras-related protein Rab-22A                                       | RAB22A   | 0.33 | 0.54 | 1.43  | -0.11 | -0.97 | -0.18 | -0.87 | 1.10  | 1.40  | -1.37 | -0.01 | -0.42 |
| P51610  | Host cell factor 1                                                | HCFC1    | 0.33 | 0.80 | 1.46  | -0.89 | -1.22 | 0.20  | -0.52 | -0.16 | 1.91  | 0.20  | -0.34 | -0.66 |
| Q81WB7  | WD repeat and FYVE domain-containing protein 1                    | WDFY1    | 0.33 | 0.23 | 1.95  | -0.42 | -1.86 | -0.14 | 0.15  | 0.86  | 0.09  | -0.84 | -0.02 | 0.24  |
| P00387  | NADH-cytochrome b5 reductase 3                                    | CYB5R3   | 0.33 | 0.64 | -1.66 | -0.92 | 1.10  | -0.21 | 0.90  | -1.19 | 0.88  | 1.06  | -0.09 | 0.14  |
| Q9NSD9  | Phenylalanine--tRNA ligase beta subunit                           | FARS5B   | 0.33 | 0.56 | 1.95  | -0.91 | 0.06  | -0.45 | -1.37 | -0.54 | 0.71  | 1.10  | 0.00  | -0.55 |
| P02747  | Complement C1q subcomponent subunit C                             | C1QC     | 0.33 | 2.22 | -2.20 | 0.75  | 0.09  | -0.75 | 0.05  | -0.12 | 1.28  | -0.08 | -0.17 | 1.16  |
| P10253  | Lysosomal alpha-glucosidase                                       | GAA      | 0.33 | 0.26 | -0.61 | 1.30  | -0.80 | -0.70 | 0.45  | -0.66 | -0.68 | 2.05  | -0.64 | 0.29  |
| O94973  | AP-2 complex subunit alpha-2                                      | AP2A2    | 0.33 | 0.73 | 0.41  | 0.91  | -1.29 | -0.37 | -0.56 | 0.30  | 2.17  | -0.83 | -0.61 | -0.13 |
| Q3SXM5  | Inactive hydroxysteroid dehydrogenase-like protein 1              | HSDL1    | 0.33 | 0.37 | -0.89 | 0.93  | 1.02  | -0.84 | -0.73 | -0.93 | 1.25  | 0.28  | -1.18 | 1.08  |
| Q16760  | Diacylglycerol kinase delta                                       | DGKD     | 0.33 | 0.78 | 0.56  | 0.09  | -0.94 | 0.50  | -1.17 | -1.64 | 1.53  | 0.79  | 0.62  | -0.36 |
| Q13310  | Polyadenylate-binding protein 4                                   | PABPC4   | 0.33 | 0.65 | 1.00  | 0.76  | -0.45 | 0.32  | -2.45 | 0.24  | -0.66 | 0.58  | 0.21  | 0.47  |
| Q8TAT6  | Nuclear protein localization protein 4 homolog                    | NPLOC4   | 0.33 | 1.19 | -0.82 | 1.48  | -1.54 | 0.53  | -0.98 | 0.49  | -0.65 | -0.28 | 0.55  | 1.22  |
| A3KMH1  | von Willebrand factor A domain-containing protein 8               | VWA8     | 0.33 | 0.39 | 1.19  | -0.62 | -0.82 | 0.34  | -0.61 | 1.56  | 1.30  | -1.00 | -0.72 | -0.62 |
| O60941  | Dystrobrein beta                                                  | DTNB     | 0.33 | 0.46 | -0.10 | -0.45 | -0.64 | 0.92  | -0.34 | -0.60 | -0.20 | -0.78 | -0.32 | 2.51  |
| Q9H7Z7  | Prostaglandin E synthase 2                                        | PTGES2   | 0.33 | 0.39 | -0.56 | -0.74 | -1.04 | 0.27  | 1.55  | -0.31 | -0.81 | 1.36  | 1.12  | -0.84 |

|        |                                                                       |          |      |      |       |       |       |       |       |       |       |       |       |       |
|--------|-----------------------------------------------------------------------|----------|------|------|-------|-------|-------|-------|-------|-------|-------|-------|-------|-------|
| O75899 | Gamma-aminobutyric acid type B receptor subunit 2                     | GABBR2   | 0.33 | 0.60 | -0.01 | 0.46  | -1.02 | 1.28  | -1.46 | -1.52 | 0.73  | 0.14  | 0.94  | 0.47  |
| P20839 | Inosine 5'-monophosphate dehydrogenase 1                              | IMPDH1   | 0.33 | 1.82 | 0.46  | -0.63 | -0.81 | 0.41  | -1.24 | 1.35  | 1.56  | -0.64 | 0.56  | -1.02 |
| Q16678 | Cytochrome P450 1B1                                                   | CYP1B1   | 0.33 | 0.47 | 0.86  | -1.10 | 0.86  | 0.58  | -1.82 | -0.28 | 0.71  | -1.10 | 0.51  | 0.78  |
| P09493 | Tropomyosin alpha-1 chain                                             | TPM1     | 0.33 | 0.26 | 0.64  | 0.69  | 0.22  | -1.91 | 0.01  | -0.01 | -0.72 | 1.68  | -0.96 | 0.36  |
| Q9H4M3 | F-box only protein 44                                                 | FBXO44   | 0.33 | 0.32 | 0.92  | 0.24  | -1.17 | 0.57  | -1.00 | -1.02 | 0.34  | -1.19 | 0.88  | 1.44  |
| P61254 | 60S ribosomal protein L26                                             | RPL26    | 0.33 | 0.83 | 0.73  | -1.87 | 0.57  | -0.04 | -0.38 | 0.33  | 1.07  | -1.38 | -0.17 | 1.14  |
| Q08117 | TLE family member 5                                                   | TLE5     | 0.32 | 0.40 | -0.28 | -0.48 | -0.72 | -0.52 | 1.47  | -0.43 | -0.44 | 2.24  | -0.49 | -0.34 |
| P49593 | Protein phosphatase 1F                                                | PPM1F    | 0.32 | 1.75 | -1.87 | 0.09  | 0.63  | 0.02  | -0.60 | -0.53 | 1.28  | 1.47  | 0.27  | -0.75 |
| Q9UHX1 | Poly(U)-binding-splicing factor PUF60                                 | PUF60    | 0.32 | 0.61 | -1.42 | 1.82  | -1.42 | 0.62  | -0.38 | -0.41 | 0.48  | -0.29 | 0.78  | 0.22  |
| Q13496 | Myotubularin                                                          | MTM1     | 0.32 | 0.36 | -2.16 | 0.75  | 0.17  | 0.82  | -0.06 | -0.21 | -1.23 | 0.20  | 0.90  | 0.82  |
| Q8WX12 | Connector enhancer of kinase suppressor of ras 2                      | CNKSR2   | 0.32 | 0.53 | 0.12  | 0.53  | -2.36 | 0.37  | 0.66  | -0.81 | 0.76  | 1.02  | 0.20  | -0.49 |
| Q7Z5R6 | Amyloid beta A4 precursor protein-binding family B member 1-ini       | APBB1IP  | 0.32 | 0.62 | -0.27 | 0.66  | -1.91 | 0.94  | -0.19 | 0.30  | -0.18 | -1.34 | 1.08  | 0.91  |
| Q99829 | Copine-1                                                              | CPNE1    | 0.32 | 0.47 | -1.01 | 0.95  | -0.24 | -0.29 | -0.03 | 1.49  | -1.82 | -0.33 | 0.17  | 1.12  |
| P31150 | Rab GDP dissociation inhibitor alpha                                  | GDI1     | 0.32 | 0.95 | -0.28 | -0.22 | 1.18  | 0.32  | -2.11 | -0.79 | -0.03 | 1.39  | 0.60  | -0.07 |
| P15104 | Glutamine synthetase                                                  | GLUL     | 0.32 | 0.52 | -0.34 | -0.99 | 0.19  | -0.50 | 0.95  | -0.31 | -0.90 | 2.31  | -0.65 | 0.23  |
| Q14678 | KN motif and ankyrin repeat domain-containing protein 1               | KANK1    | 0.32 | 0.56 | 0.22  | -0.44 | 0.68  | -0.59 | -0.59 | 2.50  | -0.54 | -0.98 | -0.33 | 0.07  |
| Q8TD55 | Pleckstrin homology domain-containing family O member 2               | PLEKHO2  | 0.32 | 0.44 | -1.28 | 0.51  | -0.14 | 1.45  | -1.13 | -0.20 | -1.24 | 0.99  | 1.07  | -0.05 |
| Q01196 | Runt-related transcription factor 1                                   | RUNX1    | 0.32 | 0.29 | -0.25 | -0.41 | -0.55 | -0.40 | 1.22  | -0.39 | 2.40  | -0.72 | -0.49 | -0.40 |
| Q9UGJ0 | 5'-AMP-activated protein kinase subunit gamma-2                       | PRKAG2   | 0.32 | 0.30 | -0.39 | 1.83  | -0.74 | -0.46 | -0.64 | 0.77  | -0.48 | -0.88 | -0.56 | 1.55  |
| P45983 | Mitogen-activated protein kinase 8                                    | MAPK8    | 0.32 | 0.38 | 0.95  | 0.37  | -2.34 | -0.18 | 0.68  | 0.73  | 0.95  | -0.26 | -0.24 | -0.66 |
| Q75251 | NADH dehydrogenase [ubiquinone] iron-sulfur protein 7, mitochondrion  | NDUFS7   | 0.32 | 0.32 | 0.13  | 0.52  | 1.32  | -1.21 | -1.19 | -0.10 | 0.02  | -1.41 | 0.60  | 1.32  |
| Q9BXT4 | Tudor domain-containing protein 1                                     | TDRD1    | 0.32 | 0.32 | -0.37 | -0.49 | -0.56 | 1.51  | -0.51 | -0.42 | -0.47 | 2.23  | -0.51 | -0.39 |
| P54727 | UV excision repair protein RAD23 homolog B                            | RAD23B   | 0.32 | 0.71 | 1.11  | -0.33 | -1.39 | -0.77 | 0.51  | 1.54  | 0.48  | 0.73  | -0.87 | -1.00 |
| Q9H7D0 | Dedicator of cytokinesis protein 5                                    | DOCK5    | 0.32 | 0.32 | -0.84 | -0.61 | -1.14 | 1.10  | 1.06  | -0.97 | -1.05 | 0.42  | 0.97  | 1.07  |
| P12110 | Collagen alpha-2(VI) chain                                            | COL6A2   | 0.32 | 0.59 | -1.48 | 1.05  | 1.47  | -0.43 | -1.38 | -0.11 | 0.88  | 0.13  | -0.64 | 0.49  |
| Q14315 | Filamin-C                                                             | FLNC     | 0.32 | 0.40 | 1.01  | 0.61  | -0.17 | -0.50 | -1.48 | 1.07  | 1.26  | -1.47 | -0.48 | 0.15  |
| Q6NUP7 | Serine/threonine-protein phosphatase 4 regulatory subunit 4           | PPP4R4   | 0.32 | 0.35 | 1.30  | 0.00  | 0.11  | -0.37 | -1.52 | 0.74  | 1.03  | -1.74 | 0.46  | -0.01 |
| P60201 | Myelin proteolipid protein                                            | PLP1     | 0.31 | 0.40 | -0.21 | -0.45 | 0.98  | -0.40 | -0.48 | -0.12 | -1.64 | 2.15  | -0.12 | 0.27  |
| Q14643 | Inositol 1,4,5-trisphosphate receptor type 1                          | ITPR1    | 0.31 | 0.96 | -1.66 | -0.85 | 0.83  | 0.63  | -0.07 | -1.08 | 1.26  | -0.61 | 1.00  | 0.54  |
| P16403 | Histone H1.2                                                          | HIST1H1C | 0.31 | 0.68 | 0.75  | -1.50 | 1.32  | 0.18  | -1.61 | 0.27  | -0.12 | 0.04  | -0.53 | 1.19  |
| Q9B267 | FERM domain-containing protein 8                                      | FRMD8    | 0.31 | 0.50 | 1.02  | -0.28 | -0.68 | -0.35 | -0.36 | 2.48  | -0.28 | -0.81 | -0.34 | -0.38 |
| O95931 | Chromobox protein homolog 7                                           | CBX7     | 0.31 | 0.50 | 1.01  | -0.35 | -0.61 | -0.36 | -0.35 | 2.45  | -0.41 | -0.95 | -0.36 | -0.07 |
| P31946 | 14-3-3 protein beta/alpha                                             | YWHA8    | 0.31 | 0.51 | -0.19 | 0.45  | -0.17 | -0.58 | -0.18 | 2.48  | 0.28  | -1.19 | -0.84 | -0.06 |
| P23458 | Tyrosine-protein kinase JAK1                                          | JAK1     | 0.31 | 0.36 | 1.28  | -1.48 | -0.32 | 0.19  | -0.15 | 1.08  | 1.13  | -1.59 | -0.15 | 0.01  |
| Q3ZCW2 | Galectin-related protein                                              | LGALS1   | 0.31 | 1.19 | -0.14 | -0.58 | -1.11 | 0.30  | 0.18  | -1.53 | 0.45  | 2.17  | 0.09  | 0.16  |
| P51858 | Hepatoma-derived growth factor                                        | HDFGF    | 0.31 | 0.63 | -0.79 | -0.29 | 2.15  | -0.60 | -1.27 | -0.46 | -0.34 | 0.70  | -0.02 | 0.93  |
| P05204 | Non-histone chromosomal protein HMG-17                                | HMG17    | 0.31 | 0.80 | 0.25  | -0.27 | 0.92  | -0.17 | -1.68 | -0.87 | -0.67 | 1.78  | -0.16 | 0.87  |
| P00918 | Carbonic anhydrase 2                                                  | CA2      | 0.31 | 1.42 | -0.70 | -1.02 | 1.48  | 0.52  | -1.82 | 0.07  | -0.49 | 0.84  | 0.80  | 0.32  |
| Q9NX46 | ADP-ribose glycohydrolase ARH3                                        | ADPRHL2  | 0.31 | 1.55 | 0.40  | -0.50 | -1.66 | -0.70 | 0.86  | 1.52  | -0.19 | 1.29  | -0.36 | -0.67 |
| P46782 | 40S ribosomal protein S5                                              | RPS5     | 0.31 | 0.50 | 0.01  | 0.37  | 1.01  | -0.53 | -1.51 | -0.50 | -1.31 | 1.74  | 0.17  | 0.54  |
| P01116 | GTPase KRas                                                           | KRAS     | 0.31 | 0.38 | -0.28 | 1.14  | -2.12 | 0.67  | 0.09  | -0.90 | -0.65 | 0.63  | 0.81  | 0.62  |
| Q8IXH7 | Negative elongation factor C/D                                        | NELFCD   | 0.31 | 0.26 | 1.28  | 0.03  | -1.34 | -0.26 | -0.08 | 1.21  | 1.25  | -1.47 | -0.11 | -0.53 |
| P05198 | Eukaryotic translation initiation factor 2 subunit 1                  | EIF2S1   | 0.31 | 0.89 | 0.46  | 0.41  | -0.01 | -0.48 | -1.44 | 0.06  | 2.26  | -1.06 | -0.24 | 0.04  |
| Q9HA64 | Ketosamine-3-kinase                                                   | FKBP1    | 0.31 | 1.33 | -0.30 | -0.87 | 0.61  | 0.97  | -1.83 | -0.46 | -0.37 | 0.33  | 1.73  | 0.21  |
| Q9Y4K3 | TNF receptor-associated factor 6                                      | TRAF6    | 0.31 | 0.30 | 0.00  | -0.48 | -1.97 | 1.34  | 0.71  | 0.09  | -0.42 | -0.86 | 1.24  | 0.35  |
| Q9Y5B9 | FACT complex subunit SPT16                                            | SUPT16H  | 0.31 | 0.24 | 2.03  | -0.73 | -0.56 | -0.28 | -0.79 | 1.53  | -0.03 | -0.99 | -0.12 | -0.06 |
| Q9Y5P6 | Mannose-1-phosphate guanyltransferase beta                            | GMPPB    | 0.30 | 1.10 | -0.89 | -0.01 | -0.74 | 1.55  | -1.15 | -0.32 | 1.47  | -0.64 | 1.08  | -0.35 |
| Q8TC12 | Retinol dehydrogenase 11                                              | RDH11    | 0.30 | 0.54 | 0.91  | 0.31  | -0.96 | 0.11  | -1.05 | 1.49  | 1.22  | -1.36 | 0.03  | -0.69 |
| Q03426 | Mevalonate kinase                                                     | MVK      | 0.30 | 0.32 | 0.75  | -0.02 | -1.86 | 1.03  | -0.35 | 0.46  | -1.46 | -0.23 | 0.89  | 0.78  |
| Q13029 | PR domain zinc finger protein 2                                       | PRDM2    | 0.30 | 0.50 | 1.09  | -0.91 | -1.13 | 0.33  | -0.03 | -0.84 | 0.62  | -1.33 | 0.68  | 1.51  |
| O43581 | Synaptotagmin-7                                                       | SYT7     | 0.30 | 0.93 | 0.37  | -0.15 | -1.60 | 0.80  | -0.51 | -1.56 | 0.84  | 0.27  | 1.48  | 0.06  |
| Q99836 | Myeloid differentiation primary response protein MyD88                | MYD88    | 0.30 | 0.89 | -0.23 | 0.06  | 0.58  | -0.68 | -0.80 | -1.00 | -0.97 | 1.76  | -0.27 | 1.55  |
| P03153 | Serine/threonine-protein phosphatase 2A 65 kDa regulatory subunit     | PPP2R1A  | 0.30 | 0.93 | -1.17 | 1.53  | -0.31 | 0.19  | -1.33 | 0.10  | 1.46  | -1.04 | 0.19  | 0.38  |
| P50914 | 60S ribosomal protein L14                                             | RPL14    | 0.30 | 1.08 | 0.97  | -0.39 | 0.27  | -0.54 | -1.54 | 0.82  | 0.73  | -1.43 | -0.27 | 1.37  |
| Q9UBB4 | Ataxin-10                                                             | ATXN10   | 0.30 | 0.34 | -1.73 | 0.01  | 0.61  | 0.28  | 0.35  | -0.93 | -1.28 | 1.38  | 0.34  | 0.96  |
| Q5T8P6 | RNA-binding protein 26                                                | RBM26    | 0.30 | 0.33 | 1.06  | -0.21 | -1.20 | -0.98 | 0.89  | -0.04 | 1.77  | -0.51 | -1.07 | 0.31  |
| Q8N461 | F-box/LRR-repeat protein 16                                           | FBXL16   | 0.30 | 0.61 | 0.73  | -0.79 | -0.67 | 0.45  | -0.50 | 1.00  | 1.91  | -1.29 | -0.04 | -0.81 |
| Q9Y285 | Phenylalanine-tRNA ligase alpha subunit                               | FARSA    | 0.30 | 0.50 | 0.93  | -1.98 | -0.88 | 0.76  | 0.53  | 0.01  | 0.76  | -1.19 | 0.47  | 0.59  |
| Q9BWM7 | Sideroflexin-3                                                        | SFXN3    | 0.30 | 0.37 | -0.77 | 1.12  | 0.01  | 0.17  | -1.03 | -0.93 | 1.63  | -0.41 | -0.99 | 1.19  |
| O60832 | H/ACA ribonucleoprotein complex subunit DKC1                          | DKC1     | 0.30 | 0.68 | -0.21 | 0.20  | 1.19  | 0.05  | -2.07 | -0.55 | 0.24  | 1.51  | -0.68 | 0.33  |
| P50583 | Bis(5'-nucleosyl)-tetraphosphatase [asymmetrical]                     | NUDT2    | 0.30 | 0.59 | 0.37  | 0.26  | -1.38 | 0.98  | -0.98 | 0.61  | -1.73 | 0.09  | 0.94  | 0.83  |
| P08319 | All-trans-retinol dehydrogenase [NAD(+)] ADH4                         | ADH4     | 0.30 | 0.24 | -0.43 | -0.44 | 1.60  | -0.45 | -0.61 | -0.53 | -0.50 | 2.14  | -0.19 | -0.59 |
| O95081 | Arf-GAP domain and FG repeat-containing protein 2                     | AGFG2    | 0.30 | 0.31 | 0.89  | 0.36  | -2.43 | 0.58  | 0.17  | -0.24 | -0.72 | -0.16 | 0.87  | 0.68  |
| P35637 | RNA-binding protein FUS                                               | FUS      | 0.30 | 1.10 | 0.61  | -1.62 | -1.87 | 0.76  | 0.86  | 0.34  | 0.89  | 0.37  | 0.06  | -0.39 |
| Q7Z4W1 | L-xylulose reductase                                                  | DCXR     | 0.30 | 0.31 | -0.45 | -0.58 | 0.13  | 0.18  | 0.29  | -0.90 | -1.51 | 0.36  | 0.24  | 2.25  |
| Q9Y3E1 | Hepatoma-derived growth factor-related protein 3                      | HDGFL3   | 0.30 | 0.62 | 1.04  | -0.15 | 1.06  | -0.95 | -1.78 | -0.07 | 0.41  | -0.64 | -0.35 | 1.43  |
| Q9Y6B6 | GTP-binding protein SAR1b                                             | SAR1B    | 0.30 | 0.31 | -0.50 | 0.52  | -1.65 | 0.71  | 0.51  | -0.49 | -1.41 | 0.05  | 0.87  | 1.41  |
| P39019 | 40S ribosomal protein S19                                             | RPS19    | 0.30 | 0.29 | 0.41  | -0.33 | -1.29 | 0.49  | 0.32  | 0.56  | -2.14 | 1.23  | 0.45  | 0.30  |
| Q9HCE5 | N6-adenosine-methyltransferase non-catalytic subunit                  | METT1L14 | 0.30 | 0.39 | 1.27  | -1.25 | -1.44 | 0.44  | 0.45  | 0.32  | 1.15  | 0.21  | -1.35 | 0.19  |
| Q96D71 | RaiBP1-associated Eps domain-containing protein 1                     | REPS1    | 0.30 | 1.23 | 0.04  | 1.16  | -1.60 | -0.64 | -0.30 | -1.01 | 0.32  | 1.82  | -0.10 | 0.33  |
| Q02880 | DNA topoisomerase 2-beta                                              | TOP2B    | 0.29 | 0.33 | 1.92  | -0.77 | -0.56 | -0.81 | -0.24 | 1.36  | 0.87  | -0.59 | -0.75 | -0.43 |
| P62249 | 40S ribosomal protein S16                                             | RPS16    | 0.29 | 1.13 | -0.55 | -1.86 | 1.61  | -0.30 | -0.17 | 0.59  | -0.41 | -0.49 | 0.30  | 1.30  |
| Q4G0N4 | NAD kinase 2, mitochondrial                                           | NADK2    | 0.29 | 1.86 | -0.65 | -1.39 | 1.17  | 0.20  | -1.15 | 1.05  | -0.03 | -1.05 | 0.82  | 1.02  |
| Q9H3P7 | Golgi resident protein GCP60                                          | ACBD3    | 0.29 | 0.29 | 0.58  | 0.11  | -1.40 | 0.23  | 0.08  | -0.22 | 2.06  | -1.52 | -0.09 | 0.18  |
| Q99459 | Cell division cycle 5-like protein                                    | CDC5L    | 0.29 | 0.72 | 1.12  | -0.65 | -0.36 | 0.14  | -1.14 | 1.07  | -1.43 | 1.15  | 0.88  | -0.78 |
| P09960 | Leukotriene A-4 hydrolase                                             | LTA4H    | 0.29 | 3.04 | 0.61  | -1.79 | -0.81 | 0.64  | -1.17 | -0.59 | 0.81  | 1.15  | 0.61  | 0.55  |
| Q9H5S1 | Serine/threonine-protein phosphatase PGAM5, mitochondrial             | PGAM5    | 0.29 | 0.66 | 1.22  | -0.75 | -1.10 | -0.26 | 0.06  | 0.90  | 1.55  | -1.57 | -0.05 | -0.01 |
| Q12830 | Nucleosome-remodeling factor subunit BPTF                             | BPTF     | 0.29 | 0.27 | 1.56  | -1.12 | -1.29 | -0.11 | 0.59  | 0.62  | 1.17  | -1.06 | 0.23  | -0.59 |
| Q9NSK0 | Kinesin light chain 4                                                 | KLC4     | 0.29 | 0.75 | -1.28 | 0.94  | -1.76 | 0.70  | 0.47  | -0.73 | -0.26 | 0.79  | 1.20  | -0.09 |
| Q9NPJ3 | Acyl-coenzyme A thioesterase 13                                       | ACOT13   | 0.29 | 0.89 | -0.34 | -0.68 | 1.72  | -0.26 | -1.48 | 1.01  | 0.47  | -1.23 | 0.18  | 0.62  |
| O94919 | Endonuclease domain-containing 1 protein                              | ENDOD1   | 0.29 | 0.64 | 0.36  | -2.57 | 0.26  | 0.87  | 0.26  | 0.47  | -0.65 | 0.16  | 0.85  | -0.01 |
| P22694 | cAMP-dependent protein kinase catalytic subunit beta                  | PRKACB   | 0.29 | 0.89 | 1.20  | -0.29 | -0.55 | 0.26  | -1.66 | 1.28  | 0.69  | -1.39 | -0.07 | 0.52  |
| Q8IYD1 | Eukaryotic peptide chain release factor GTP-binding subunit ERF3/GSP2 | ERF3     | 0.29 | 0.86 | 0.75  | 0.49  | -1.20 | 0.18  | -1.23 | 0.61  | 1.31  | -1.66 | 0.19  | 0.57  |



|        |                                                                        |          |      |      |       |       |       |       |       |       |       |       |       |       |
|--------|------------------------------------------------------------------------|----------|------|------|-------|-------|-------|-------|-------|-------|-------|-------|-------|-------|
| P55010 | Eukaryotic translation initiation factor 5                             | EIF5     | 0.29 | 0.52 | 0.23  | 0.97  | -0.94 | 0.33  | -1.27 | 1.09  | 0.79  | -1.84 | 0.27  | 0.36  |
| P62633 | Cellular nucleic acid-binding protein                                  | CNBP     | 0.29 | 0.40 | 1.07  | 0.98  | -0.18 | -0.72 | -1.69 | 0.78  | 1.23  | -0.49 | -1.06 | 0.08  |
| P24386 | Rab proteins geranylgeranyltransferase component A 1                   | CHM      | 0.29 | 0.32 | -1.01 | 0.75  | 0.48  | 0.55  | -1.19 | -1.12 | -1.24 | 0.95  | 0.68  | 1.16  |
| P19623 | Spermidine synthase                                                    | SRM      | 0.29 | 0.78 | 1.95  | -1.23 | -0.49 | -0.29 | -0.89 | 1.49  | 0.22  | -0.49 | -0.05 | -0.23 |
| Q96I18 | DISP complex protein LRCH3                                             | LRCH3    | 0.28 | 0.30 | -0.45 | 1.83  | -0.69 | -0.53 | -0.56 | 0.25  | -0.64 | -0.90 | 1.76  | -0.07 |
| P04004 | Vitronectin                                                            | VTN      | 0.28 | 0.21 | -0.67 | 0.23  | 1.60  | -0.75 | -0.71 | -0.74 | -0.76 | 1.09  | -0.71 | 1.42  |
| Q7Z222 | Elongation factor-like GTPase 1                                        | EFL1     | 0.28 | 1.24 | 0.14  | -1.09 | -0.25 | -0.69 | 0.51  | -1.01 | 0.83  | 0.89  | -1.13 | 1.80  |
| O00159 | Unconventional myosin-Ic                                               | MYO1C    | 0.28 | 0.57 | 0.77  | -0.05 | -0.94 | 0.11  | -0.63 | 1.57  | -1.89 | -0.14 | 0.16  | 1.02  |
| P55265 | Double-stranded RNA-specific adenosine deaminase                       | ADAR     | 0.28 | 0.29 | 1.86  | -0.67 | -1.13 | -0.02 | -0.43 | 1.66  | -0.39 | -0.86 | -0.04 | 0.04  |
| Q2M3C7 | A-kinase anchor protein SPHKAP                                         | SPHKAP   | 0.28 | 0.26 | 0.56  | -1.05 | 0.24  | 0.96  | -1.07 | -0.89 | -0.33 | 1.63  | 0.95  | -0.99 |
| P49418 | Amphiphysin                                                            | AMPH     | 0.28 | 0.45 | -2.44 | 0.43  | 0.14  | 0.39  | 0.89  | -0.87 | 0.18  | 1.02  | 0.26  | 0.01  |
| P46821 | Microtubule-associated protein 1B                                      | MAP1B    | 0.28 | 0.54 | 1.01  | -0.60 | 0.35  | 0.05  | -1.50 | -0.17 | 1.97  | -1.15 | -0.04 | 0.07  |
| Q96J17 | Spatacsin                                                              | SPG11    | 0.28 | 0.38 | 1.11  | -0.41 | -1.38 | 0.53  | -0.35 | 0.41  | 0.29  | -1.76 | 0.20  | 1.36  |
| P19338 | Nucleolin                                                              | NCL      | 0.28 | 0.47 | -1.04 | 0.24  | 0.16  | 0.41  | -0.38 | -0.14 | -2.15 | 1.04  | 0.81  | 1.07  |
| Q6ZNW5 | GDP-D-glucose phosphorylase 1                                          | GDPGP1   | 0.28 | 0.31 | -0.56 | 1.73  | -0.95 | 0.03  | -0.67 | 0.61  | 1.61  | -0.97 | -0.21 | -0.62 |
| O00629 | Importin subunit alpha-3                                               | KPNA4    | 0.28 | 0.64 | -0.65 | 1.01  | -0.98 | 0.63  | -0.81 | -0.73 | 0.58  | 1.22  | 0.42  | 1.74  |
| Q9BSW7 | Synaptotagmin-17                                                       | SYT17    | 0.28 | 0.46 | -1.04 | 1.54  | -1.21 | -0.62 | 0.72  | -0.25 | 0.08  | 1.62  | -0.69 | -0.16 |
| Q76N11 | Kinase non-catalytic C-lobe domain-containing protein 1                | KNDC1    | 0.28 | 0.44 | 1.01  | -0.09 | -0.89 | 0.19  | -0.80 | -0.02 | 2.26  | -1.13 | -0.23 | -0.30 |
| P84243 | Histone H3.3                                                           | H3F3A    | 0.28 | 0.41 | 0.08  | -1.79 | 1.86  | 0.09  | -0.80 | 0.57  | -0.99 | 0.18  | 0.21  | 0.58  |
| Q76041 | Nebulette                                                              | NEBL     | 0.28 | 0.67 | 0.68  | 0.65  | -2.27 | 0.30  | -0.20 | 1.09  | -0.19 | -1.00 | 0.17  | 0.76  |
| Q9NTX5 | Ethylmalonyl-CoA decarboxylase                                         | ECHDC1   | 0.28 | 0.42 | -0.44 | -1.66 | -0.27 | 0.78  | 1.02  | -0.89 | -1.04 | 1.21  | 0.95  | 0.33  |
| P02746 | Complement C1q subcomponent subunit B                                  | C1QB     | 0.28 | 1.64 | -1.20 | 0.20  | 0.30  | -0.40 | -0.60 | 0.27  | -0.36 | -0.81 | 0.14  | 2.45  |
| Q9BW85 | Splicing factor YJU2                                                   | YJU2     | 0.28 | 0.27 | 1.24  | -1.26 | -1.45 | 0.52  | 0.58  | 1.08  | -1.30 | 0.25  | 0.48  | -0.14 |
| Q7Z4K8 | Tripartite motif-containing protein 46                                 | TRIM46   | 0.28 | 0.51 | 1.04  | -0.88 | -1.82 | 0.76  | 0.24  | 0.82  | 0.80  | -1.30 | -0.08 | 0.43  |
| P10909 | Clusterin                                                              | CLU      | 0.28 | 0.32 | 1.76  | 0.26  | -0.81 | -0.84 | -0.80 | 0.94  | 1.32  | -0.65 | -0.79 | -0.38 |
| Q7Z333 | Probable helicase senataxin                                            | SETX     | 0.28 | 0.24 | 1.07  | 0.68  | 0.00  | -1.01 | -1.08 | 1.54  | -0.36 | -1.25 | -0.53 | 0.93  |
| P31399 | Bifunctional purine biosynthesis protein PURH                          | ATIC     | 0.28 | 0.93 | 1.08  | -1.84 | -0.34 | 0.73  | -0.72 | 0.31  | -1.13 | 0.48  | 1.29  | 0.14  |
| P20340 | Ras-related protein Rab-6A                                             | RAB6A    | 0.28 | 0.31 | 0.28  | -1.03 | 1.93  | -0.43 | -1.18 | -0.20 | 0.40  | 1.30  | -0.35 | -0.72 |
| Q15651 | High mobility group nucleosome-binding domain-containing protein HMGN3 | HMGN3    | 0.28 | 0.37 | 1.09  | -0.16 | 1.14  | -0.87 | -1.70 | 0.64  | -0.83 | 0.88  | -0.79 | 0.60  |
| Q9BRJ7 | Tudor-interacting repair regulator protein                             | NUDT16L1 | 0.28 | 0.24 | -1.18 | -0.30 | 0.26  | 0.70  | 0.18  | -1.30 | -1.42 | 1.30  | 0.92  | 0.82  |
| Q9UH16 | Probable ATP-dependent RNA helicase DDX20                              | DDX20    | 0.28 | 0.24 | 1.51  | -0.83 | -1.02 | -0.42 | 0.42  | 0.43  | 1.46  | -1.13 | -0.90 | 0.48  |
| O95757 | Heat shock 70 kDa protein 4L                                           | HSPA4L   | 0.28 | 0.47 | 0.66  | 0.77  | -1.29 | 0.18  | -0.92 | 1.20  | 0.71  | -1.78 | -0.06 | 0.55  |
| Q7Z699 | Sprouty-related, EVH1 domain-containing protein 1                      | SPRED1   | 0.28 | 0.45 | -0.33 | 1.34  | -0.90 | -0.05 | -0.65 | -0.46 | 2.10  | -0.91 | 0.38  | -0.52 |
| Q92619 | Rho GTPase-activating protein 45                                       | ARHGAP45 | 0.28 | 0.26 | 1.50  | -0.15 | -0.74 | -0.28 | -0.69 | 2.06  | -0.54 | -0.86 | 0.27  | -0.56 |
| P48739 | Phosphatidylinositol transfer protein beta isoform                     | PITPNB   | 0.27 | 0.39 | 1.32  | -0.55 | -1.00 | 0.46  | -0.74 | 1.62  | -0.28 | 0.29  | 0.38  | -1.50 |
| P51970 | NADH dehydrogenase [ubiquinone] 1 alpha subcomplex subunit 8           | NDUFAB8  | 0.27 | 0.49 | 1.29  | -0.39 | -1.64 | 0.71  | -0.60 | 1.34  | -0.53 | -0.61 | -0.52 | 0.95  |
| P21333 | Filamin-A                                                              | FLNA     | 0.27 | 0.32 | 1.79  | -0.33 | -0.71 | -0.77 | -0.41 | 1.63  | 0.39  | -0.23 | -1.24 | -0.13 |
| O43526 | Potassium voltage-gated channel subfamily KQT member 2                 | KCNQ2    | 0.27 | 0.93 | 0.00  | 1.44  | -0.30 | -0.41 | -1.82 | -0.83 | 1.54  | 0.43  | 0.23  | -0.27 |
| P12004 | Proliferating cell nuclear antigen                                     | PCNA     | 0.27 | 0.39 | -0.55 | -0.53 | 0.95  | -0.50 | 0.10  | -0.43 | -1.50 | 1.30  | -0.53 | 1.68  |
| Q16773 | Kynurenine--oxoglutarate transaminase 1                                | KYAT1    | 0.27 | 0.26 | 0.63  | 0.45  | -1.17 | 0.44  | -0.70 | 1.18  | -2.09 | 0.55  | 0.38  | 0.35  |
| Q92522 | Histone H1x                                                            | H1FX     | 0.27 | 0.60 | -0.59 | -0.70 | 0.82  | 0.67  | -0.96 | -0.92 | -1.13 | 0.06  | 1.04  | 1.71  |
| Q99435 | Protein kinase C-binding protein NELL2                                 | NELL2    | 0.27 | 0.41 | -0.94 | -0.19 | 0.50  | 0.82  | -0.72 | -0.14 | -1.74 | 1.76  | 0.70  | -0.04 |
| P60983 | Glia maturation factor beta                                            | GMBF     | 0.27 | 1.41 | 0.73  | 0.64  | -2.28 | -0.44 | -0.15 | 0.63  | 0.93  | 0.90  | -0.74 | -0.21 |
| O75326 | Semaphorin-7A                                                          | SEMA7A   | 0.27 | 1.18 | 1.59  | -0.88 | -0.56 | -0.14 | -1.33 | 0.30  | -0.52 | 1.62  | -0.60 | 0.51  |
| O75369 | Filamin-B                                                              | FLNB     | 0.27 | 1.13 | 0.48  | -0.18 | 0.12  | -0.16 | -1.54 | 0.05  | 2.18  | -0.30 | -1.12 | 0.48  |
| P34949 | Mannose-6-phosphate isomerase                                          | MPI      | 0.27 | 0.55 | -0.51 | -0.18 | 1.12  | 0.68  | -1.80 | 1.57  | 0.16  | 0.44  | -0.74 | -0.72 |
| O14807 | Ras-related protein M-Ras                                              | MRAS     | 0.27 | 1.02 | -0.25 | 0.03  | -0.64 | 0.53  | -0.85 | 0.49  | -0.01 | -1.84 | 0.72  | 1.83  |
| P09913 | Interferon-induced protein with tetratricopeptide repeats 2            | IFIT2    | 0.27 | 0.28 | -0.16 | 2.06  | -1.37 | -0.24 | -0.68 | 0.99  | -0.68 | -0.51 | -0.17 | 0.76  |
| Q9H6R3 | Acyl-CoA synthetase short-chain family member 3, mitochondrial         | ACSS3    | 0.27 | 0.35 | 0.03  | -1.21 | 1.20  | 0.24  | -0.73 | 1.25  | -0.55 | -1.63 | 0.63  | 0.77  |
| Q5H9R4 | Armadillo repeat-containing X-linked protein 4                         | ARMCX4   | 0.27 | 1.01 | 0.25  | -0.22 | -0.86 | -0.22 | -0.15 | -0.02 | 2.64  | -0.99 | -0.32 | -0.13 |
| Q96Q42 | Alsin                                                                  | ALS2     | 0.27 | 0.45 | -0.96 | 0.28  | 1.16  | -1.91 | 0.83  | -0.52 | 0.99  | -0.31 | -0.45 | 0.88  |
| Q8WXX5 | DnaJ homolog subfamily C member 9                                      | DNAJC9   | 0.26 | 0.29 | -0.41 | 1.89  | -0.77 | -0.59 | -0.53 | -0.54 | -0.59 | -0.81 | 1.25  | 1.08  |
| Q9BVG4 | Protein PBDC1                                                          | PBDC1    | 0.26 | 0.46 | -0.36 | -0.37 | -0.82 | -0.40 | 1.34  | 2.11  | -0.40 | -1.03 | -0.50 | 0.42  |
| Q86UR5 | Regulating synaptic membrane exocytosis protein 1                      | RIMS1    | 0.26 | 2.00 | 1.14  | -1.74 | -1.05 | -0.08 | -0.19 | 0.29  | -0.56 | 1.74  | 0.18  | 0.26  |
| Q6N069 | N-alpha-acetyltransferase 16, NatA auxiliary subunit                   | NAA16    | 0.26 | 0.81 | 0.04  | -0.18 | -0.42 | -0.15 | -0.30 | 2.67  | -0.32 | -1.20 | -0.05 | -0.09 |
| Q9ULV4 | Coronin-1C                                                             | CORO1C   | 0.26 | 0.72 | -1.56 | -0.58 | 0.62  | -0.01 | 0.65  | -0.67 | -1.08 | 1.87  | 0.42  | 0.34  |
| Q15018 | BRISC complex subunit Abraxas 2                                        | ABRAXAS2 | 0.26 | 0.49 | -1.40 | 1.07  | 0.86  | 0.81  | -1.99 | -0.09 | 0.36  | 0.28  | 0.45  | -0.34 |
| O14841 | 5-oxoprolinase                                                         | OPLAL    | 0.26 | 0.35 | 1.26  | -0.77 | -0.21 | -0.72 | 0.67  | 1.26  | -0.24 | -1.51 | -0.08 | 1.05  |
| Q9BW62 | Katanin p60 ATPase-containing subunit A-like 1                         | KATNAL1  | 0.26 | 0.38 | 0.60  | 0.76  | 0.22  | 0.39  | -2.47 | -0.16 | 0.73  | -0.76 | 0.77  | -0.07 |
| P18433 | Receptor-type tyrosine-protein phosphatase alpha                       | PTPRA    | 0.26 | 0.46 | -1.97 | 0.94  | -0.01 | 1.09  | -0.66 | -0.40 | -0.71 | 0.18  | 1.36  | 0.18  |
| P36873 | Serine/threonine-protein phosphatase PP1-gamma catalytic subunit       | PPP1CC   | 0.26 | 1.19 | -0.72 | 0.11  | -1.63 | 1.24  | -0.32 | 1.21  | -0.10 | -1.09 | 1.22  | 0.07  |
| O00330 | Pyruvate dehydrogenase protein X component, mitochondrial              | PDXH     | 0.26 | 0.59 | -0.50 | -0.33 | 0.10  | 0.58  | -0.62 | -1.55 | -1.14 | 1.46  | 0.78  | 1.21  |
| O60641 | Clathrin coat assembly protein AP180                                   | SNAP91   | 0.26 | 0.48 | -0.90 | 0.41  | -0.85 | 0.12  | 0.59  | -1.65 | 0.53  | 1.94  | 0.19  | -0.37 |
| Q92610 | Zinc finger protein 592                                                | ZNF592   | 0.26 | 0.24 | -0.28 | -0.53 | -0.61 | -0.46 | 1.53  | -0.44 | -0.36 | -0.67 | 2.19  | -0.38 |
| Q9BY11 | Protein kinase C and casein kinase substrate in neurons protein 1      | PACSLN1  | 0.26 | 0.40 | -1.24 | -0.51 | 0.14  | -0.01 | 1.09  | -1.42 | 0.35  | 1.95  | -0.14 | -0.19 |
| O95674 | Phosphatidate cytidyltransferase 2                                     | CDS2     | 0.26 | 0.20 | -0.41 | 0.61  | -0.61 | 0.64  | -0.52 | -0.41 | 2.48  | -0.76 | -0.53 | -0.49 |
| Q08380 | Galectin-3-binding protein                                             | LGALS3BP | 0.26 | 0.43 | 0.03  | -1.44 | 0.15  | 0.46  | 0.24  | -0.45 | -1.50 | 1.84  | 0.88  | -0.20 |
| P25786 | Proteasome subunit alpha-type-1                                        | PSMA1    | 0.26 | 0.47 | -0.95 | -1.36 | 0.39  | 0.04  | 1.27  | -0.66 | -0.71 | 1.83  | 0.38  | -0.23 |
| O00160 | Unconventional myosin-II                                               | MYO1F    | 0.26 | 0.36 | -2.00 | 0.95  | -0.07 | 0.75  | -0.12 | 0.39  | -0.93 | -0.80 | 0.57  | 1.25  |
| P52597 | Heterogeneous nuclear ribonucleoprotein F                              | HNRNPFF  | 0.26 | 0.43 | 0.55  | -1.38 | -1.43 | 0.83  | 0.86  | 0.70  | -1.24 | -0.39 | 0.80  | 0.71  |
| Q13126 | S-methyl-5'-thioadenosine phosphorylase                                | MTAP     | 0.26 | 0.20 | 0.04  | -0.38 | 0.89  | -1.48 | 0.64  | -1.11 | -1.07 | 1.44  | 0.99  | 0.04  |
| Q7Z6Z7 | E3 ubiquitin-protein ligase HUWE1                                      | HUWE1    | 0.25 | 0.40 | -0.49 | -1.69 | 1.11  | -0.29 | 0.82  | -0.26 | -0.08 | 1.75  | 0.00  | -0.87 |
| P49721 | Proteasome subunit beta type-2                                         | PSMB2    | 0.25 | 0.68 | -0.84 | -1.72 | 0.74  | -0.34 | 1.32  | -0.27 | -0.48 | 1.61  | 0.17  | -0.18 |
| Q92769 | Histone deacetylase 2                                                  | HDAC2    | 0.25 | 1.35 | 1.44  | -1.12 | -1.61 | 0.03  | -0.19 | 0.65  | -0.82 | 0.03  | 0.23  | 1.36  |
| Q5SW79 | Centrosomal protein of 170 kDa                                         | CEP170   | 0.25 | 0.56 | 1.33  | -0.11 | 0.25  | 0.00  | -2.18 | 0.98  | 0.28  | 0.71  | -0.42 | -0.83 |
| Q99715 | Collagen alpha-1(XII) chain                                            | COL12A1  | 0.25 | 0.17 | 0.92  | -0.35 | 0.69  | -1.34 | -0.16 | 0.95  | 1.31  | -1.57 | -0.75 | 0.30  |
| P48443 | Retinoic acid receptor RXR-gamma                                       | RXRG     | 0.25 | 0.50 | -0.12 | -0.86 | 2.02  | -0.78 | -0.91 | 0.46  | -0.34 | 1.34  | -0.03 | -0.77 |
| P17028 | Zinc finger protein 24                                                 | ZNF24    | 0.25 | 0.55 | 0.44  | 0.45  | -1.68 | 0.30  | -0.21 | 1.68  | 0.61  | -1.57 | 0.06  | -0.09 |
| P26232 | Catenin alpha-2                                                        | CTNNA2   | 0.25 | 0.26 | -2.53 | 0.57  | 0.71  | 0.48  | 0.40  | -0.72 | 0.60  | -0.38 | 0.40  | 0.46  |
| P05164 | Myeloperoxidase                                                        | MPO      | 0.25 | 0.32 | 0.16  | -1.25 | -1.44 | 0.91  | 1.18  | -0.95 | -0.33 | 1.43  | 0.07  | 0.21  |
| Q7Z3E5 | LisH domain-containing protein ARMC9                                   | ARMC9    | 0.25 | 0.20 | -0.96 | -0.28 | -1.18 | 0.83  | 1.32  | -1.01 | -1.05 | 1.02  | 0.91  | 0.41  |
| Q9HCM2 | Plexin-A4                                                              | PLXNA4   | 0.25 | 0.31 | 0.06  | 1.44  | -0.04 | 0.21  | -2.10 | 1.43  | -0.33 | -0.33 | 0.11  | -0.46 |
| P28288 | ATP-binding cassette sub-family D member 3                             | ABCD3    | 0.25 | 0.39 | -0.88 | 0.01  | 0.41  | -0.21 | 0.14  | 0.91  | -1.05 | -1.57 | 0.39  | 1.86  |

|        |                                                                             |          |      |      |       |       |       |       |       |       |       |       |       |       |
|--------|-----------------------------------------------------------------------------|----------|------|------|-------|-------|-------|-------|-------|-------|-------|-------|-------|-------|
| Q9BQ19 | Nuclear receptor-interacting protein 2                                      | NRIP2    | 0.25 | 0.30 | -0.95 | -1.12 | 1.09  | 0.42  | 0.15  | -1.05 | -1.05 | 1.59  | 0.87  | 0.05  |
| Q6NYC1 | Bifunctional arginine demethylase and lysyl-hydroxylase JMJD6               | JMJD6    | 0.25 | 0.46 | 0.34  | -0.94 | -1.44 | 0.35  | 1.08  | 0.38  | -1.29 | -0.67 | 0.98  | 1.19  |
| Q03518 | Antigen peptide transporter 1                                               | TAP1     | 0.25 | 0.35 | -0.26 | 1.19  | -0.63 | -0.39 | -0.38 | -0.29 | -0.34 | -0.82 | -0.47 | 2.40  |
| P63096 | Guanine nucleotide-binding protein (G(i)) subunit alpha-1                   | GNAI1    | 0.25 | 0.40 | -0.12 | 1.78  | -2.16 | 0.47  | -0.51 | -0.17 | 0.53  | -0.29 | 0.55  | -0.07 |
| Q9ULA0 | Aspartyl aminopeptidase                                                     | DNPEP    | 0.25 | 0.38 | 0.96  | -1.65 | 0.64  | -0.65 | 0.20  | 1.72  | 0.33  | 0.01  | -0.47 | -1.09 |
| Q8IUX7 | Adipocyte enhancer-binding protein 1                                        | AEBP1    | 0.25 | 0.23 | 1.70  | -0.32 | 0.33  | -0.55 | -1.49 | 1.31  | 0.11  | -0.72 | -0.92 | 0.55  |
| P02730 | Band 3 anion transport protein                                              | SLC4A1   | 0.24 | 0.16 | 1.52  | -0.11 | -1.00 | -0.95 | 0.30  | 1.51  | 0.55  | -1.12 | -0.90 | 0.19  |
| Q96FC7 | Phytanoyl-CoA hydroxylase-interacting protein-like                          | PHYHPL   | 0.24 | 0.63 | 0.66  | -1.25 | -0.33 | 0.51  | -0.39 | 1.66  | -0.77 | -1.48 | 0.70  | 0.68  |
| P27815 | cAMP-specific 3',5'-cyclic phosphodiesterase 4A                             | PDE4A    | 0.24 | 0.22 | 0.31  | 0.19  | 0.48  | 0.82  | -2.11 | -1.21 | -0.66 | 0.51  | 0.80  | 0.86  |
| P00338 | L-lactate dehydrogenase A chain                                             | LDHA     | 0.24 | 0.65 | -0.08 | -0.01 | -0.48 | 0.60  | -0.85 | -0.56 | -0.28 | 2.37  | 0.48  | -1.19 |
| Q9UG63 | ATP-binding cassette sub-family F member 2                                  | ABCF2    | 0.24 | 0.70 | -1.13 | -1.99 | -1.07 | 0.67  | 0.39  | 0.61  | -0.51 | -0.62 | 0.86  | 0.51  |
| P50453 | Serpin B9                                                                   | SERPINB9 | 0.24 | 0.21 | -0.05 | -1.13 | 0.85  | -0.06 | 0.08  | -1.17 | -0.34 | 1.26  | -1.09 | 1.65  |
| O43823 | A-kinase anchor protein 8                                                   | AKAP8    | 0.24 | 0.34 | 0.97  | -2.01 | -0.38 | 0.03  | 0.92  | 1.43  | -0.68 | -0.60 | 0.38  | -0.07 |
| Q9UQE7 | Structural maintenance of chromosomes protein 3                             | SMC3     | 0.24 | 0.32 | 1.32  | 0.17  | -0.19 | -0.25 | -1.48 | 1.30  | 1.06  | -1.33 | 0.00  | -0.60 |
| Q00978 | Interferon regulatory factor 9                                              | IRF9     | 0.24 | 0.19 | 0.38  | -0.72 | -0.74 | -0.66 | 1.47  | -0.67 | 0.75  | -0.94 | 1.72  | -0.59 |
| P06400 | Retinoblastoma-associated protein                                           | RB1      | 0.24 | 0.27 | 1.25  | -0.32 | -1.42 | 0.05  | 0.07  | 0.82  | 1.28  | 0.58  | -1.14 | -1.17 |
| Q8N3R9 | MAGUK p55 subfamily member 5                                                | MPP5     | 0.24 | 0.26 | 0.70  | 0.64  | -1.46 | -0.17 | -0.07 | -1.20 | -1.30 | 0.74  | 1.04  | 1.08  |
| Q9HAV4 | Exportin-5                                                                  | XPO5     | 0.23 | 0.30 | -0.28 | -0.33 | -0.55 | 1.17  | -0.43 | -0.41 | -0.37 | -0.78 | -0.44 | 2.42  |
| Q14331 | Protein FRG1                                                                | FRG1     | 0.23 | 0.28 | 0.81  | -0.28 | 0.34  | 0.59  | -1.85 | 0.17  | -1.68 | 0.19  | 0.71  | 1.00  |
| Q8N1N4 | Keratin, type II cytoskeletal 78                                            | KRT78    | 0.23 | 0.44 | -0.57 | -0.15 | 0.85  | -0.78 | 0.07  | -0.54 | -0.15 | 2.42  | -1.07 | -0.07 |
| Q7LSN7 | Lysophosphatidylcholine acyltransferase 2                                   | LPCAT2   | 0.23 | 0.43 | 1.34  | 0.13  | -0.86 | -1.91 | 0.73  | 1.34  | -0.10 | -0.39 | -0.51 | 0.23  |
| Q5T5C0 | Syntaxin-binding protein 5                                                  | STXBP5   | 0.23 | 0.46 | -0.40 | 1.41  | -0.71 | 0.18  | -1.09 | 0.76  | 1.18  | -1.75 | 0.13  | 0.28  |
| P61081 | NEDD8-conjugating enzyme Ubc12                                              | UBE2M    | 0.23 | 0.81 | 0.48  | -0.43 | -1.17 | 0.67  | -0.53 | -0.45 | -0.55 | -0.83 | 0.60  | 2.22  |
| Q9Y2H5 | Pleckstrin homology domain-containing family A member 6                     | PLEKHA6  | 0.23 | 0.28 | 1.65  | -0.28 | -0.32 | 0.02  | -1.45 | 1.34  | 0.82  | -1.15 | -0.33 | -0.29 |
| P99999 | Cytochrome c                                                                | CYCS     | 0.23 | 0.34 | -0.86 | -0.39 | -0.36 | -0.55 | 1.69  | -1.30 | 0.04  | 1.77  | -0.05 | 0.01  |
| P53004 | Biliverdin reductase A                                                      | BLVRA    | 0.23 | 1.33 | 0.37  | -1.99 | -1.26 | 0.72  | 0.71  | -0.47 | -0.03 | -0.05 | 1.20  | 0.80  |
| P42229 | Signal transducer and activator of transcription 5A                         | STAT5A   | 0.23 | 0.31 | -0.54 | 0.47  | -0.86 | 1.28  | -0.77 | -0.58 | -0.67 | -1.02 | 1.25  | 1.45  |
| Q92783 | Signal transducing adapter molecule 1                                       | STAM     | 0.23 | 0.66 | -1.21 | 2.01  | -0.11 | -0.43 | -1.09 | 0.31  | 1.00  | -0.91 | 0.02  | 0.41  |
| P63241 | Eukaryotic translation initiation factor 5A-1                               | EIF5A    | 0.23 | 0.92 | -0.73 | -1.52 | -0.26 | 0.72  | 0.71  | 1.26  | -0.59 | -1.26 | 1.09  | 0.58  |
| Q99962 | Endophilin-A1                                                               | SH3GL2   | 0.23 | 0.75 | -1.40 | 0.53  | 0.29  | -0.21 | -0.13 | -0.57 | 2.45  | -0.33 | -0.34 | -0.28 |
| A1Z1Q3 | ADP-ribose glycohydrolase MACROD2                                           | MACROD2  | 0.23 | 0.27 | -1.94 | 0.61  | 0.78  | -0.76 | 0.93  | -0.72 | -0.07 | 0.47  | -0.61 | 1.30  |
| Q13043 | Serine/threonine-protein kinase 4                                           | STK4     | 0.23 | 0.33 | 0.97  | 0.74  | -1.10 | 0.25  | -1.30 | 1.31  | -0.19 | -1.54 | 0.26  | 0.60  |
| Q9P227 | Rho GTPase-activating protein 23                                            | ARHGAP23 | 0.23 | 0.24 | 0.04  | 1.28  | 0.21  | 0.56  | -2.43 | -0.46 | -0.46 | 0.11  | 0.66  | 0.49  |
| O95996 | Adenomatous polyposis coli protein 2                                        | APC2     | 0.23 | 0.37 | -1.54 | 0.42  | 0.64  | -0.14 | 0.12  | -1.91 | -0.01 | 0.83  | 0.32  | 1.26  |
| Q8TDJ6 | Dmx-like protein 2                                                          | DMXL2    | 0.23 | 0.25 | 1.38  | 0.39  | -1.89 | 0.03  | -0.25 | 1.27  | 0.52  | -1.19 | -0.17 | -0.08 |
| O95140 | Mitofusin-2                                                                 | MFN2     | 0.22 | 0.43 | 1.49  | -1.38 | -0.41 | 0.16  | -0.42 | -0.26 | 1.33  | -1.47 | 0.32  | 0.65  |
| O95573 | Long-chain-fatty-acid--CoA ligase 3                                         | ACSL3    | 0.22 | 0.36 | -0.15 | 1.26  | -0.36 | 0.38  | -1.61 | 0.80  | 0.65  | -1.72 | 0.05  | 0.70  |
| P40926 | Malate dehydrogenase, mitochondrial                                         | MDH2     | 0.22 | 0.38 | 1.03  | -0.36 | 0.15  | -0.75 | -0.57 | 0.33  | 0.48  | 1.91  | -0.62 | -1.59 |
| Q13190 | Syntaxin-5                                                                  | STX5     | 0.22 | 0.40 | 0.63  | 0.67  | -0.25 | 0.84  | -2.42 | -0.66 | -0.14 | -0.13 | 0.69  | 0.78  |
| Q14123 | Calcium/calmodulin-dependent 3',5'-cyclic nucleotide phosphodiesterase 1    | PDE1C    | 0.22 | 0.21 | 1.22  | 0.02  | -0.60 | 0.55  | -1.48 | 0.96  | 1.05  | -1.41 | 0.39  | -0.71 |
| Q9UPP5 | AP2-interacting clathrin-endocytosis protein                                | KIAA1107 | 0.22 | 0.60 | 0.27  | 0.27  | -1.71 | 0.40  | 0.01  | 0.78  | 0.62  | -1.97 | 0.61  | 0.73  |
| Q71U19 | Histone H2A.V                                                               | H2AFV    | 0.22 | 0.31 | 0.38  | -1.96 | 0.80  | 0.20  | 0.16  | 0.27  | -1.68 | 0.87  | 0.81  | 0.15  |
| P04075 | Fructose-bisphosphate aldolase A                                            | ALDOA    | 0.22 | 0.37 | -0.37 | 0.00  | 0.28  | -0.90 | 0.49  | 0.01  | -0.63 | 2.52  | -0.65 | -0.75 |
| Q76G19 | PDZ domain-containing protein 4                                             | PDZD4    | 0.22 | 0.22 | -1.55 | 0.48  | 0.40  | 0.44  | -0.08 | -1.29 | 1.86  | -0.78 | 0.52  | 0.00  |
| Q9UQD0 | Sodium channel protein type 8 subunit alpha                                 | SCN8A    | 0.22 | 0.17 | 1.72  | 0.16  | -0.88 | -0.35 | -0.90 | 0.90  | 1.38  | -1.04 | -0.43 | -0.57 |
| Q9Y3B4 | Splicing factor 3B subunit 6                                                | SF3B6    | 0.22 | 0.22 | -1.00 | 0.89  | 0.46  | 0.47  | -1.13 | -1.19 | -1.19 | 0.68  | 0.67  | 1.33  |
| P09104 | Gamma-enolase                                                               | ENO2     | 0.22 | 0.30 | -0.21 | 0.21  | 0.21  | -0.99 | 0.37  | -0.08 | -0.61 | 2.52  | -0.58 | -0.84 |
| Q9UJW0 | Dynactin subunit 4                                                          | DCTN4    | 0.22 | 0.40 | 0.57  | -0.07 | -1.68 | 0.32  | 0.33  | 0.92  | 1.50  | -1.56 | 0.00  | -0.32 |
| Q00722 | 1-phosphatidylinositol 4,5-bisphosphate phosphodiesterase beta-2            | PLCB2    | 0.22 | 0.22 | 1.55  | -0.48 | -0.65 | -0.35 | -0.38 | 2.17  | -0.40 | -0.74 | -0.33 | -0.38 |
| Q9UKN8 | General transcription factor 3C polypeptide 4                               | GTF3C4   | 0.22 | 0.43 | 1.26  | -0.64 | -1.15 | -0.60 | 0.56  | 0.63  | -0.75 | -1.36 | 1.25  | 0.80  |
| Q14697 | Neutral alpha-glucosidase AB                                                | GANAB    | 0.22 | 0.45 | -0.39 | -0.18 | 2.04  | -0.23 | -1.84 | 0.63  | 0.45  | -0.71 | 0.34  | -0.11 |
| Q6UVK1 | Chondroitin sulfate proteoglycan 4                                          | CSPG4    | 0.21 | 0.30 | -0.68 | -0.68 | 0.13  | 1.66  | -0.85 | -0.70 | -0.79 | -0.27 | 1.81  | 0.37  |
| Q15208 | Serine/threonine-protein kinase 38                                          | STK38    | 0.21 | 0.32 | -0.60 | -0.39 | -0.78 | 0.72  | 0.62  | -0.73 | -0.77 | -1.09 | 1.33  | 1.70  |
| P06733 | Alpha-enolase                                                               | ENO1     | 0.21 | 0.34 | -0.34 | -1.09 | 0.97  | -0.18 | 0.19  | -0.34 | -1.23 | 2.21  | 0.18  | -0.36 |
| Q9P2A4 | ABI gene family member 3                                                    | ABI3     | 0.21 | 0.20 | 0.96  | 0.85  | -1.70 | 0.11  | -0.50 | 1.66  | -0.75 | -0.89 | 0.25  | 0.01  |
| Q9P258 | Protein RCC2                                                                | RCC2     | 0.21 | 0.21 | 0.67  | -0.68 | 1.15  | -2.17 | 0.73  | -0.27 | -0.16 | 0.55  | -0.66 | 0.83  |
| P50749 | Ras association domain-containing protein 2                                 | RASSF2   | 0.21 | 0.24 | -1.09 | 0.30  | -1.72 | 1.08  | 1.08  | -0.54 | 0.57  | -0.96 | 0.87  | 0.40  |
| Q9P121 | Neurotrimin                                                                 | NTM      | 0.21 | 0.36 | 0.49  | 1.31  | 0.04  | -0.53 | -1.80 | -0.07 | -0.58 | 1.73  | -0.45 | -0.14 |
| Q9UL25 | Ras-related protein Rab-21                                                  | RAB21    | 0.21 | 0.91 | -0.55 | 0.99  | 0.49  | 0.44  | -2.46 | 0.02  | -0.44 | 0.10  | 0.64  | 0.78  |
| Q9GZR7 | ATP-dependent RNA helicase DDX24                                            | DDX24    | 0.21 | 0.36 | -0.27 | 0.98  | -0.93 | -0.22 | -0.05 | -0.69 | -1.85 | 0.79  | 1.03  | 1.21  |
| Q6PCB7 | Long-chain fatty acid transport protein 1                                   | SLC27A1  | 0.21 | 0.34 | 0.69  | -1.22 | 0.16  | -0.62 | 0.54  | 1.05  | 1.01  | -2.00 | -0.03 | 0.43  |
| P06732 | Creatine kinase M-type                                                      | CKM      | 0.21 | 0.16 | 0.76  | -0.65 | -0.71 | 0.98  | -0.62 | 0.21  | 2.14  | -0.84 | -0.65 | -0.62 |
| P46109 | Crk-like protein                                                            | CRKL     | 0.21 | 0.91 | -0.65 | 0.77  | -0.74 | 0.51  | -0.96 | 0.81  | -0.77 | -1.40 | 1.04  | 1.40  |
| P68400 | Casein kinase II subunit alpha                                              | CSNK2A1  | 0.21 | 0.51 | 0.65  | -0.44 | 0.00  | 1.07  | -1.94 | 0.63  | 0.08  | -1.41 | 0.94  | 0.42  |
| O14910 | Protein lin-7 homolog A                                                     | LIN7A    | 0.21 | 0.44 | 0.41  | -0.07 | -1.31 | 0.18  | 0.20  | 1.08  | 1.48  | -1.86 | 0.28  | -0.38 |
| Q9Y4L1 | Hypoxia up-regulated protein 1                                              | HYOU1    | 0.21 | 0.23 | -1.65 | 0.50  | 0.73  | 0.56  | -0.47 | -0.79 | -0.72 | -0.56 | 0.65  | 1.75  |
| P23528 | Cofilin-1                                                                   | CFL1     | 0.21 | 1.52 | 0.65  | -1.56 | -1.40 | 0.67  | 0.06  | -0.17 | -0.72 | 0.93  | 1.53  | 0.00  |
| Q9NSC5 | Homer protein homolog 3                                                     | HOMER3   | 0.21 | 0.27 | -0.54 | 0.77  | -1.06 | -0.70 | 1.16  | -0.67 | -0.76 | 1.15  | -0.81 | 1.47  |
| P29992 | Guanine nucleotide-binding protein subunit alpha-11                         | GNA11    | 0.21 | 0.54 | -1.85 | -0.02 | 0.56  | 0.90  | -0.28 | -0.74 | -0.83 | -0.24 | 1.24  | 1.25  |
| Q9P0J1 | [Pyruvate dehydrogenase [acetyl-transferring]]-phosphatase 1, mitochondrial | PDP1     | 0.20 | 0.22 | 0.23  | -0.89 | 0.83  | 0.61  | -1.09 | 1.29  | 1.36  | -1.35 | -0.31 | -0.68 |
| Q92845 | Kinesin-associated protein 3                                                | KIFAP3   | 0.20 | 0.11 | 1.21  | -0.24 | -1.23 | 0.15  | -0.05 | 0.80  | 1.51  | -1.69 | -0.09 | -0.37 |
| O60346 | PH domain leucine-rich repeat-containing protein phosphatase 1              | PHLPP1   | 0.20 | 0.20 | -0.76 | -0.87 | 1.56  | 0.84  | -1.04 | -0.86 | 0.43  | 0.74  | 0.98  | -1.00 |
| O14879 | Interferon-induced protein with tetratricopeptide repeats 3                 | IFIT3    | 0.20 | 0.24 | 0.85  | 1.29  | -1.19 | -0.07 | -1.22 | 0.79  | 0.77  | -1.56 | 0.20  | 0.13  |
| O94887 | FERM, ARHGGEF and pleckstrin domain-containing protein 2                    | FARP2    | 0.20 | 0.27 | 0.54  | -0.23 | -0.93 | 1.08  | -0.83 | -1.35 | -0.87 | 0.00  | 1.32  | 1.27  |
| O15126 | Secretory carrier-associated membrane protein 1                             | SCAMP1   | 0.20 | 0.20 | 0.65  | 1.72  | -1.51 | -0.90 | -0.24 | 0.33  | 0.49  | -0.10 | -1.22 | 0.79  |
| Q92889 | DNA repair endonuclease XPF                                                 | ERCC4    | 0.20 | 0.23 | -0.40 | 1.97  | -0.71 | -0.51 | -0.67 | -0.54 | -0.64 | 0.33  | 1.65  | -0.47 |
| Q9GZN8 | UPF0687 protein C20orf27                                                    | C20orf27 | 0.20 | 1.10 | -1.50 | -0.99 | 1.04  | -0.45 | 0.66  | -1.22 | -0.06 | 1.06  | 1.16  | 0.29  |
| P69905 | Hemoglobin subunit alpha                                                    | HBA1     | 0.20 | 0.57 | -0.29 | -1.34 | -0.26 | 0.76  | 0.40  | -1.84 | 0.33  | 1.58  | 0.58  | 0.08  |
| Q15813 | Tubulin-specific chaperone E                                                | TBCE     | 0.20 | 0.32 | -0.42 | 0.92  | -0.16 | 1.26  | -2.03 | -0.06 | -0.11 | -0.92 | 1.10  | 0.43  |
| Q9NXV6 | CDKN2A-interacting protein                                                  | CDKN2AIP | 0.20 | 0.26 | 0.95  | -0.40 | -1.09 | -0.78 | 0.96  | -0.03 | 1.59  | -1.18 | -0.82 | 0.79  |
| Q9NUU7 | ATP-dependent RNA helicase DDX19A                                           | DDX19A   | 0.20 | 0.56 | 0.64  | 0.95  | -1.14 | 0.33  | -1.49 | 1.58  | -0.36 | -1.09 | 0.10  | 0.49  |
| Q9UDT6 | CAP-Gly domain-containing linker protein 2                                  | CLIP2    | 0.20 | 0.12 | 1.53  | -0.12 | 0.26  | -0.78 | -1.07 | 0.72  | 1.51  | -1.33 | -0.41 | -0.30 |
| O95487 | Protein transport protein Sec24B                                            | SEC24B   | 0.20 | 0.43 | -0.05 | -0.78 | -0.80 | 0.30  | 0.74  | 0.60  | -2.21 | 0.75  | 0.36  | 1.08  |

|        |                                                                      |           |      |      |       |       |       |       |       |       |       |       |       |       |
|--------|----------------------------------------------------------------------|-----------|------|------|-------|-------|-------|-------|-------|-------|-------|-------|-------|-------|
| Q15052 | Rho guanine nucleotide exchange factor 6                             | ARHGEF6   | 0.20 | 0.50 | -0.06 | -0.04 | -0.44 | 0.17  | -0.29 | 0.59  | 1.83  | -2.21 | 0.19  | 0.27  |
| P31146 | Coronin-1A                                                           | CORO1A    | 0.19 | 0.53 | -0.52 | 1.80  | -0.15 | -0.16 | -1.64 | -0.35 | 1.42  | -0.54 | -0.30 | 0.45  |
| Q9Y6K5 | 2'-5'-oligoadenylate synthase 3                                      | OAS3      | 0.19 | 0.25 | 1.31  | 0.71  | -0.31 | -0.10 | -1.95 | 0.72  | -0.64 | -0.14 | -0.75 | 1.16  |
| P01112 | GTPase HRas                                                          | HRAS      | 0.19 | 0.52 | -0.54 | 1.06  | -0.12 | -0.42 | -0.66 | -1.44 | 2.20  | 0.13  | -0.02 | -0.20 |
| P60891 | Ribose-phosphate pyrophosphokinase 1                                 | PRPS1     | 0.19 | 0.56 | -0.64 | 0.52  | 0.45  | 0.30  | -1.35 | 0.12  | -0.38 | -0.21 | 2.22  | -1.03 |
| Q9Y4D1 | Disheveled-associated activator of morphogenesis 1                   | DAAM1     | 0.19 | 0.20 | -1.23 | 1.30  | 0.75  | 0.39  | -1.49 | 0.29  | -1.39 | 0.10  | 0.52  | 0.76  |
| P50607 | Tubby protein homolog                                                | TUB       | 0.19 | 0.45 | 0.38  | -1.54 | -0.72 | 0.69  | 0.60  | -1.53 | 0.00  | 0.91  | -0.18 | 1.39  |
| Q9UQN3 | Charged multivesicular body protein 2b                               | CHMP2B    | 0.19 | 0.37 | 1.47  | 0.10  | -0.02 | 0.12  | -2.18 | 0.15  | 0.94  | -1.03 | 0.26  | 0.18  |
| Q9Y4G6 | Talin-2                                                              | TLN2      | 0.19 | 0.32 | -1.12 | 0.97  | -0.26 | 0.25  | -0.28 | -1.82 | 1.17  | 1.34  | 0.05  | -0.32 |
| Q8WYP5 | Protein ELYS                                                         | AHCTF1    | 0.19 | 0.31 | 0.92  | -1.01 | -0.88 | 0.83  | -0.28 | -0.35 | -0.68 | -1.16 | 1.00  | 1.63  |
| O43491 | Band 4.1-like protein 2                                              | EPB41L2   | 0.19 | 0.60 | -0.13 | -0.47 | 0.14  | 0.17  | -0.50 | 1.62  | 1.45  | -1.81 | 0.16  | -0.63 |
| P43003 | Excitatory amino acid transporter 1                                  | SLC1A3    | 0.19 | 0.42 | -1.11 | 0.04  | -0.79 | 0.26  | 1.04  | -1.15 | -0.95 | 1.82  | 0.25  | 0.60  |
| Q99497 | Protein/nucleic acid deglycase DJ-1                                  | PARK7     | 0.19 | 0.33 | -0.90 | -0.46 | 0.36  | -0.27 | 0.82  | -1.47 | -0.16 | 2.22  | -0.03 | -0.11 |
| O95251 | Histone acetyltransferase KAT7                                       | KAT7      | 0.19 | 0.18 | 0.83  | -0.09 | -1.69 | 0.33  | 0.37  | 1.00  | 0.70  | -1.90 | 0.32  | 0.14  |
| Q9P1A6 | Disks large-associated protein 2                                     | DLGAP2    | 0.19 | 0.10 | -0.27 | 0.48  | -0.16 | -0.38 | 0.18  | -0.45 | 2.54  | -1.28 | -0.35 | -0.31 |
| P23743 | Diacylglycerol kinase alpha                                          | DGKA      | 0.19 | 0.36 | -1.18 | 1.29  | -0.40 | -0.28 | 0.10  | -1.88 | 0.79  | -0.14 | 1.07  | 0.63  |
| Q96NW4 | Ankyrin repeat domain-containing protein 27                          | ANKRD27   | 0.19 | 0.27 | 0.62  | 0.58  | -2.62 | 0.45  | 0.58  | 0.20  | -0.30 | -0.41 | 0.75  | 0.14  |
| P02790 | Hemopexin                                                            | HPX       | 0.19 | 0.16 | 0.96  | 0.43  | 0.19  | -0.32 | -1.48 | -0.40 | 0.01  | 1.81  | -1.44 | 0.25  |
| P40429 | 60S ribosomal protein L13a                                           | RPL13A    | 0.19 | 0.27 | -0.60 | -1.58 | -0.66 | 0.29  | 2.17  | -0.68 | 0.03  | 0.21  | 0.21  | 0.62  |
| P00450 | Ceruloplasmin                                                        | CP        | 0.19 | 0.33 | 1.30  | -0.86 | -0.03 | -1.14 | 0.28  | 1.28  | 1.10  | 0.20  | -1.04 | -1.10 |
| Q92620 | Pre-mRNA-splicing factor ATP-dependent RNA helicase PRP16            | DHX38     | 0.19 | 0.25 | 1.70  | -0.88 | -1.07 | 0.27  | -0.37 | 0.75  | -0.85 | -1.14 | 0.56  | 1.02  |
| P21926 | CD9 antigen                                                          | CD9       | 0.19 | 0.26 | -0.28 | -0.45 | 0.99  | 0.18  | -0.81 | -0.50 | -1.34 | 2.19  | 0.30  | -0.29 |
| P00488 | Coagulation factor XIII A chain                                      | F13A1     | 0.19 | 0.29 | -0.80 | 0.46  | 1.48  | 0.46  | -1.99 | -0.83 | -0.43 | 0.60  | 0.57  | 0.49  |
| P35580 | Myosin-10                                                            | MYH10     | 0.19 | 0.28 | -1.40 | -0.66 | 0.22  | 1.10  | 0.36  | -1.08 | -0.90 | 1.05  | 1.45  | -0.12 |
| Q15436 | Protein transport protein Sec23A                                     | SEC23A    | 0.18 | 0.32 | 1.35  | -0.22 | -1.53 | 0.31  | -0.35 | 0.56  | 1.39  | -1.53 | -0.02 | 0.04  |
| Q8N2F6 | Armadillo repeat-containing protein 10                               | ARMC10    | 0.18 | 0.17 | 2.03  | -0.54 | -0.71 | -0.48 | -0.54 | 1.58  | -0.08 | -0.88 | -0.51 | 0.13  |
| O60333 | Kinesin-like protein KIF1B                                           | KIF1B     | 0.18 | 0.17 | 0.11  | 1.07  | -1.41 | 1.21  | -1.23 | 0.69  | 0.23  | -1.43 | 0.27  | 0.48  |
| P09382 | Galactin-1                                                           | LGALS1    | 0.18 | 0.53 | -0.57 | -0.36 | 0.48  | 0.43  | -0.67 | 0.13  | -1.31 | 2.26  | 0.42  | -0.80 |
| Q9UNH7 | Sorting nexin-6                                                      | SNX6      | 0.18 | 0.23 | -1.35 | 1.29  | -0.13 | 0.49  | -0.62 | 0.05  | -1.63 | 0.42  | 0.08  | 1.42  |
| Q9NPF4 | Probable tRNA N6-adenosine threonylcarbamoyltransferase              | OSGEP     | 0.18 | 0.32 | -1.02 | -0.09 | 1.18  | 0.23  | -0.74 | -1.64 | 0.27  | 1.72  | 0.37  | -0.29 |
| P35250 | Replication factor C subunit 2                                       | RFC2      | 0.18 | 0.19 | 0.53  | -0.71 | -1.42 | 0.90  | 0.43  | -1.15 | -1.18 | 0.50  | 1.26  | 0.82  |
| P84098 | 60S ribosomal protein L19                                            | RPL19     | 0.18 | 0.22 | -0.28 | -1.86 | 0.10  | -0.09 | 1.83  | 1.32  | -0.21 | -0.30 | -0.05 | -0.45 |
| Q9HC98 | Serine/threonine-protein kinase Nek6                                 | NBK6      | 0.18 | 0.32 | -0.16 | -0.22 | -0.20 | -0.10 | 0.24  | 1.48  | -0.16 | -2.33 | 0.47  | 0.98  |
| P11142 | Heat shock cognate 71 kDa protein                                    | HSPA8     | 0.18 | 0.77 | -0.91 | 0.43  | 1.57  | -0.09 | -1.95 | -0.62 | 0.45  | 1.05  | -0.03 | 0.10  |
| P68133 | Actin, alpha skeletal muscle                                         | ACTA1     | 0.18 | 0.51 | -0.18 | 1.19  | -0.87 | 0.29  | -1.09 | 0.44  | 0.92  | -1.85 | 0.13  | 1.02  |
| Q05682 | Caldesmon                                                            | CALD1     | 0.18 | 0.34 | 0.32  | 0.65  | 1.16  | -0.77 | -1.83 | 0.86  | -0.06 | -0.63 | -0.86 | 1.15  |
| Q81207 | Ankyrin repeat domain-containing protein 13A                         | ANKRD13A  | 0.18 | 0.20 | 0.55  | -0.98 | 0.94  | 0.19  | -0.99 | -0.97 | 0.26  | -1.38 | 1.43  | 0.94  |
| Q9Y3B2 | Exosome complex component CSL4                                       | EXOSC1    | 0.18 | 0.21 | 1.27  | -0.90 | -0.94 | 1.06  | -0.79 | 0.73  | -0.89 | -1.14 | 0.94  | 0.65  |
| Q04206 | Transcription factor p65                                             | RELA      | 0.18 | 0.22 | -0.68 | 0.79  | -1.92 | 0.89  | 0.62  | 0.63  | -1.01 | -0.20 | 1.22  | -0.34 |
| Q96P53 | WD repeat and FYVE domain-containing protein 2                       | WDFY2     | 0.18 | 0.15 | -1.65 | -0.21 | 0.61  | 0.60  | 0.43  | -0.57 | -1.65 | 0.92  | 1.11  | 0.42  |
| O00154 | Cytosolic acyl coenzyme A thioester hydrolase                        | ACOT7     | 0.18 | 0.44 | 0.74  | -1.45 | 0.39  | -0.18 | -0.09 | 0.14  | -0.49 | 2.08  | 0.08  | -1.24 |
| Q9Y613 | Epsin-1                                                              | EPN1      | 0.18 | 0.41 | -1.68 | 1.37  | -0.40 | -0.15 | 0.31  | -1.03 | 1.56  | -0.43 | -0.15 | 0.60  |
| Q5TA50 | Ceramide-1-phosphate transfer protein                                | CPTP      | 0.18 | 0.21 | 0.14  | 0.63  | 0.14  | 0.70  | -1.63 | 0.78  | 0.31  | -1.90 | 0.07  | 1.04  |
| O75380 | NADH dehydrogenase [ubiquinone] iron-sulfur protein 6, mitochondrion | NDUFS6    | 0.18 | 0.29 | -2.57 | 0.84  | 0.97  | 0.60  | -0.25 | 0.32  | 0.39  | -0.23 | 0.04  | -0.11 |
| Q9Y566 | SH3 and multiple ankyrin repeat domains protein 1                    | SHANK1    | 0.18 | 0.22 | -0.11 | 1.20  | -0.63 | -0.44 | -0.34 | -0.43 | 2.38  | -0.80 | -0.46 | -0.37 |
| O14787 | Transportin-2                                                        | TNPO2     | 0.18 | 0.21 | 0.76  | 0.69  | -1.53 | 0.78  | -1.00 | 0.66  | 0.12  | -1.68 | 0.55  | 0.64  |
| Q9NV17 | ATPase family AAA domain-containing protein 3A                       | ATAD3A    | 0.18 | 0.17 | 0.66  | -0.81 | 1.54  | -0.25 | -1.39 | 0.44  | 0.43  | -1.62 | 0.39  | 0.62  |
| Q9HAV0 | Guanine nucleotide-binding protein subunit beta-4                    | GNB4      | 0.18 | 0.45 | -0.60 | 1.77  | -1.91 | 0.77  | -0.63 | 0.47  | -0.15 | -0.54 | 0.36  | 0.46  |
| Q9H9E3 | Conserved oligomeric Golgi complex subunit 4                         | COG4      | 0.18 | 0.27 | -0.24 | -0.36 | -0.75 | -0.23 | 1.21  | -0.34 | -0.44 | -0.75 | -0.48 | 2.37  |
| P46777 | 60S ribosomal protein L5                                             | RPL5      | 0.18 | 0.51 | -0.89 | -1.48 | 2.13  | -0.73 | 0.30  | -0.35 | 0.69  | 0.47  | -0.16 | 0.02  |
| Q13322 | Growth factor receptor-bound protein 10                              | GRB10     | 0.17 | 0.21 | -0.16 | -0.23 | -1.99 | 0.85  | 1.22  | 0.49  | 0.91  | -1.04 | 0.53  | -0.59 |
| Q96RL7 | Vacuolar protein sorting-associated protein 13A                      | VPS13A    | 0.17 | 0.32 | 0.06  | 0.24  | -1.79 | 0.20  | 0.87  | -1.53 | 0.31  | -0.29 | 1.49  | 0.45  |
| Q12792 | Twinfilin-1                                                          | TWF1      | 0.17 | 0.66 | -0.25 | -0.74 | 1.38  | 0.22  | -1.44 | 1.27  | 0.93  | -1.36 | 0.13  | -0.15 |
| Q13247 | Serine/arginine-rich splicing factor 6                               | SRSF6     | 0.17 | 0.28 | -0.78 | 1.28  | 0.14  | -2.02 | 1.00  | -0.59 | 0.63  | 0.25  | -0.60 | 0.69  |
| Q9BXF6 | Rab11 family-interacting protein 5                                   | RAB11FIP5 | 0.17 | 0.32 | 0.50  | 0.68  | -2.32 | 0.80  | -0.09 | 0.79  | 0.25  | -1.19 | 0.23  | 0.36  |
| Q81WR0 | Zinc finger CCH domain-containing protein 7A                         | ZC3H7A    | 0.17 | 0.33 | -0.35 | -0.21 | 0.22  | -0.32 | 0.20  | -1.40 | -0.10 | 2.55  | -0.23 | -0.35 |
| P60709 | Actin, cytoplasmic 1                                                 | ACTB      | 0.17 | 0.69 | -0.70 | 1.39  | -0.73 | 0.79  | -1.62 | 0.42  | 1.16  | -1.07 | 0.01  | 0.34  |
| O15372 | Eukaryotic translation initiation factor 3 subunit H                 | EIF3H     | 0.17 | 0.56 | -0.98 | 1.19  | -0.42 | 0.41  | -0.92 | -0.80 | -1.34 | 1.23  | 0.50  | 1.11  |
| Q99590 | Protein SCAF11                                                       | SCAF11    | 0.17 | 0.34 | -0.33 | -0.42 | -1.01 | 1.86  | -0.56 | -0.55 | -0.56 | 0.52  | 1.64  | -0.58 |
| Q9BRZ2 | E3 ubiquitin-protein ligase TRIM56                                   | TRIM56    | 0.17 | 0.17 | 0.32  | 0.03  | -1.88 | 0.24  | 1.04  | 0.53  | -1.75 | 0.14  | 0.60  | 0.72  |
| P14174 | Macrophage migration inhibitory factor                               | MIF       | 0.17 | 0.31 | -0.56 | -0.08 | 1.29  | -0.27 | -0.80 | -1.08 | -0.22 | 2.23  | -0.19 | -0.30 |
| O43149 | Zinc finger ZZ-type and EF-hand domain-containing protein 1          | ZZEF1     | 0.17 | 0.31 | -1.47 | 0.41  | -0.15 | -0.47 | 0.95  | -1.72 | -0.36 | 1.08  | 0.33  | 1.09  |
| Q8TDB6 | E3 ubiquitin-protein ligase DTX3L                                    | DTX3L     | 0.17 | 0.21 | 1.37  | -0.62 | -0.93 | -0.07 | -0.05 | -0.65 | 2.20  | -0.19 | -0.42 | -0.63 |
| Q96GK7 | Fumarylacetoacetate hydrolase domain-containing protein 2A           | FAHD2A    | 0.17 | 0.15 | -1.61 | -0.30 | 1.38  | 0.15  | 0.16  | -1.64 | 0.28  | 1.23  | 0.28  | 0.07  |
| Q03154 | Aminocyclase-1                                                       | ACY1      | 0.17 | 0.27 | -0.20 | -0.30 | 1.10  | -0.47 | -0.51 | -0.07 | -0.48 | 2.40  | -0.93 | -0.55 |
| Q9UHY1 | Nuclear receptor-binding protein                                     | NRBP1     | 0.17 | 0.21 | -1.01 | -0.45 | 0.15  | 0.88  | 0.13  | -1.78 | -0.66 | 1.57  | 0.91  | 0.26  |
| Q08357 | Sodium-dependent phosphate transporter 2                             | SLC20A2   | 0.17 | 0.26 | -0.21 | 1.64  | -0.72 | -0.48 | -0.59 | 0.25  | -0.51 | -0.88 | -0.45 | 1.96  |
| Q8N568 | Serine/threonine-protein kinase DCLK2                                | DCLK2     | 0.17 | 0.22 | 0.77  | -0.30 | -1.07 | 0.36  | -0.05 | 0.31  | 0.00  | -1.84 | 1.89  | -0.06 |
| P07099 | Epoxide hydrolase 1                                                  | EPHX1     | 0.16 | 0.53 | -0.85 | -0.37 | 1.48  | 0.63  | -1.58 | -1.01 | -0.48 | 0.95  | 0.86  | 0.37  |
| Q9UHD1 | Cysteine and histidine-rich domain-containing protein 1              | CHORDC1   | 0.16 | 1.01 | -1.81 | 0.35  | -1.43 | 1.26  | 0.45  | 0.25  | 0.49  | -0.39 | 1.11  | -0.28 |
| Q13144 | Translation initiation factor eIF-2B subunit epsilon                 | EIF2B5    | 0.16 | 0.62 | 0.06  | -0.20 | -0.30 | 0.63  | -0.97 | 0.91  | 0.36  | -2.05 | 0.03  | 1.54  |
| Q9HAS0 | Protein Njmu-R1                                                      | C17orf75  | 0.16 | 0.16 | -0.56 | 0.70  | -0.87 | 1.21  | -0.70 | -0.58 | -0.75 | -1.07 | 1.27  | 1.36  |
| Q13023 | A-kinase anchor protein 6                                            | AKAP6     | 0.16 | 0.25 | -0.53 | 1.42  | -0.97 | 0.70  | -0.97 | -0.78 | 0.65  | -1.23 | 0.45  | 1.26  |
| P35908 | Keratin, type II cytoskeletal 2 epidermal                            | KRT2      | 0.16 | 0.22 | -0.71 | -1.45 | 1.38  | -0.19 | 0.66  | -0.85 | 0.59  | 1.52  | -0.16 | -0.78 |
| Q9BWH6 | RNA polymerase II-associated protein 1                               | RPAP1     | 0.16 | 0.31 | 0.04  | -0.34 | 0.67  | 0.68  | -1.46 | -0.55 | -1.70 | 0.51  | 1.18  | 0.98  |
| O75937 | DnaJ homolog subfamily C member 8                                    | DNAJC8    | 0.16 | 0.34 | -1.99 | -0.48 | 1.00  | 0.63  | 0.38  | -0.62 | -0.54 | -0.53 | 0.97  | 1.18  |
| O95478 | Ribosome biogenesis protein NSA2 homolog                             | NSA2      | 0.16 | 0.14 | -0.62 | -0.73 | -0.96 | 0.07  | 2.04  | 1.26  | 0.30  | 0.23  | -0.86 | -0.71 |
| Q9NXG2 | THUMP domain-containing protein 1                                    | THUMPD1   | 0.16 | 0.21 | -0.61 | -0.01 | 1.22  | 0.02  | -0.92 | -0.87 | 0.95  | 1.83  | -0.87 | -0.74 |
| O00294 | Tubby-related protein 1                                              | TULP1     | 0.16 | 0.15 | 1.24  | -0.84 | 1.13  | -0.78 | -0.96 | 0.69  | 1.14  | -1.16 | -0.83 | 0.36  |
| Q15717 | ELAV-like protein 1                                                  | ELAVL1    | 0.16 | 0.44 | 0.88  | 0.49  | -1.37 | 0.51  | -1.08 | 1.02  | -1.16 | -0.92 | 0.60  | 1.04  |
| P61225 | Ras-related protein Rap-2b                                           | RAP2B     | 0.16 | 0.09 | 1.08  | 0.55  | -1.02 | 0.22  | -0.96 | 1.30  | 1.24  | -1.15 | -0.94 | -0.33 |
| P53384 | Cytosolic Fe-S cluster assembly factor NUBP1                         | NUBP1     | 0.16 | 0.23 | 0.62  | 1.38  | 0.02  | -1.37 | -0.97 | 0.65  | -1.39 | -0.48 | 0.55  | 1.00  |
| Q92859 | Neogenin                                                             | NEO1      | 0.15 | 0.27 | -0.13 | 0.80  | -0.85 | 0.38  | -0.57 | -0.56 | -0.38 | 2.46  | -0.62 | -0.51 |

|            |                                                                           |          |      |      |       |       |       |       |       |       |       |       |       |       |
|------------|---------------------------------------------------------------------------|----------|------|------|-------|-------|-------|-------|-------|-------|-------|-------|-------|-------|
| Q92562     | Polyphosphoinositide phosphatase                                          | FIG4     | 0.15 | 0.29 | 1.56  | 0.46  | -0.37 | -0.12 | -1.94 | 0.41  | 1.29  | -0.45 | -0.30 | -0.55 |
| Q9UKM9     | RNA-binding protein Raly                                                  | RALY     | 0.15 | 0.13 | 0.56  | -2.17 | -0.24 | 0.91  | 0.75  | 0.09  | -1.26 | 0.10  | 0.90  | 0.35  |
| O75170     | Serine/threonine-protein phosphatase 6 regulatory subunit 2               | PPP6R2   | 0.15 | 0.20 | -1.25 | 1.72  | -0.77 | 0.64  | -0.61 | 0.51  | -1.34 | -0.09 | 1.00  | 0.20  |
| O75140     | GATOR complex protein DEPDC5                                              | DEPDC5   | 0.15 | 0.15 | -1.36 | -0.55 | 0.63  | 0.67  | 0.40  | -2.10 | 0.65  | 0.73  | 0.65  | 0.27  |
| Q15369     | Blonlin-C                                                                 | ELOC     | 0.15 | 0.42 | 0.14  | 0.72  | -0.38 | 0.04  | -1.07 | 1.28  | 0.97  | -2.10 | -0.01 | 0.42  |
| Q9UK99     | F-box only protein 3                                                      | FBXO3    | 0.15 | 0.18 | -0.34 | 1.88  | -0.78 | -0.48 | -0.53 | -0.48 | -0.56 | -1.01 | 1.08  | 1.23  |
| Q9UPN3     | Microtubule-actin cross-linking factor 1, isoforms 1/2/3/5                | MACF1    | 0.15 | 0.18 | -1.49 | -0.08 | 0.79  | 0.54  | -0.02 | -1.62 | 0.08  | 1.56  | 0.73  | -0.50 |
| Q9H954     | Calcium-binding protein 39-like                                           | CAB39L   | 0.15 | 0.16 | -0.50 | -0.68 | -0.84 | 0.19  | 1.61  | -0.67 | -0.71 | 1.86  | -0.63 | 0.37  |
| Q86YT6     | E3 ubiquitin-protein ligase MIB1                                          | MIB1     | 0.15 | 0.13 | 1.70  | 0.23  | -1.23 | -0.18 | -0.71 | 0.72  | 1.15  | -1.45 | -0.30 | 0.07  |
| O75886     | Signal transducing adapter molecule 2                                     | STAM2    | 0.15 | 0.19 | -0.16 | -0.15 | 0.06  | -0.08 | 0.04  | -2.56 | 1.02  | 0.76  | 0.86  | 0.21  |
| Q5V125     | Serine/threonine-protein kinase MRCK alpha                                | CDC42BPA | 0.15 | 0.32 | 1.71  | 0.56  | -0.98 | -0.47 | -1.26 | 1.12  | 0.94  | -0.51 | -0.56 | -0.54 |
| Q7RTN6     | STE20-related kinase adapter protein alpha                                | STRADA   | 0.15 | 0.37 | 0.91  | 0.41  | -0.06 | -0.02 | -1.73 | 0.11  | 2.00  | -0.82 | -0.44 | -0.35 |
| Q81YU2     | E3 ubiquitin-protein ligase HACE1                                         | HACE1    | 0.15 | 0.22 | 0.07  | 1.38  | -0.90 | -0.32 | -0.53 | 1.38  | -0.13 | -1.79 | -0.03 | 0.88  |
| O75128     | Protein cordon-bleu                                                       | COBL     | 0.15 | 0.15 | 0.27  | -0.18 | -1.99 | 1.06  | 0.62  | -0.41 | -1.07 | -0.30 | 0.90  | 1.10  |
| P42345     | Serine/threonine-protein kinase mTOR                                      | MTOR     | 0.15 | 0.22 | -1.14 | 0.48  | 0.14  | 0.87  | -0.67 | -1.03 | -1.38 | 1.47  | 1.03  | 0.22  |
| P46778     | 60S ribosomal protein L21                                                 | RPL21    | 0.15 | 0.48 | -0.60 | -1.88 | -0.09 | 0.69  | 1.25  | 0.13  | 0.85  | -1.33 | 0.34  | 0.64  |
| P50990     | T-complex protein 1 subunit theta                                         | CCT8     | 0.15 | 0.41 | 0.55  | 0.15  | 0.35  | 0.08  | -1.67 | 1.06  | 1.57  | -1.34 | -0.16 | -0.58 |
| O95292     | Vesicle-associated membrane protein-associated protein B/C                | VAPB     | 0.15 | 0.14 | -1.33 | 0.72  | 0.10  | 0.39  | -0.09 | -1.34 | -1.16 | 1.70  | 0.45  | 0.56  |
| O43707     | Alpha-actinin-4                                                           | ACTN4    | 0.15 | 0.22 | -1.06 | -0.05 | 0.84  | -0.10 | 0.07  | -0.41 | -1.23 | 2.32  | -0.07 | -0.31 |
| Q8N335     | Glycerol-3-phosphate dehydrogenase 1-like protein                         | GPDI1L   | 0.15 | 0.12 | 0.21  | -1.10 | -0.88 | 0.78  | 0.82  | -0.24 | -0.71 | 1.68  | 0.77  | -1.32 |
| Q8WUX9     | Charged multivesicular body protein 7                                     | CHMP7    | 0.15 | 0.16 | -0.12 | 1.14  | -0.33 | 0.54  | -1.46 | 0.45  | 0.52  | -1.87 | 0.04  | 1.09  |
| Q92499     | ATP-dependent RNA helicase DDX1                                           | DDX1     | 0.15 | 0.28 | 0.94  | -0.29 | -1.74 | 1.04  | -0.35 | 0.61  | -1.03 | -0.85 | 1.20  | 0.46  |
| AOA087WW87 | Immunoglobulin kappa variable 2-40                                        | IGKV2-40 | 0.14 | 0.10 | 0.43  | 0.89  | 0.47  | -1.78 | -0.15 | 0.64  | -0.09 | 0.74  | -1.80 | 0.64  |
| Q13813     | Spectrin alpha chain, non-erythrocytic 1                                  | SPTAN1   | 0.14 | 0.62 | 0.83  | 0.16  | -0.10 | -1.44 | -0.24 | 0.36  | 1.61  | 0.98  | -1.33 | -0.83 |
| P05166     | Propionyl-CoA carboxylase beta chain, mitochondrial                       | PCCB     | 0.14 | 0.24 | -0.97 | -0.99 | 1.92  | -1.23 | 0.92  | -0.20 | -0.27 | 0.49  | -0.41 | 0.72  |
| Q9Y4D7     | Plexin-D1                                                                 | PLXND1   | 0.14 | 0.08 | -1.20 | 1.47  | -1.33 | 0.70  | 0.24  | -0.58 | -1.22 | 0.50  | 0.62  | 0.80  |
| Q9NSI8     | SAM domain-containing protein SAMSN-1                                     | SAMSN1   | 0.14 | 0.18 | -0.01 | 1.66  | -1.04 | -0.02 | -0.84 | 0.84  | -0.79 | -1.25 | 0.22  | 1.23  |
| Q8N9R8     | Protein SCAI                                                              | SCAI     | 0.14 | 0.15 | -0.12 | 1.50  | -0.19 | -0.52 | -0.89 | -0.65 | 1.65  | -1.46 | 0.08  | 0.61  |
| Q9BPY3     | Protein FAM118B                                                           | FAM118B  | 0.14 | 0.20 | -0.16 | 0.32  | -1.74 | 0.69  | 0.62  | 1.23  | -1.65 | 0.19  | -0.29 | 0.80  |
| P30039     | Phenazine biosynthesis-like domain-containing protein                     | PBLD     | 0.14 | 0.10 | 1.81  | -0.82 | 0.57  | -0.87 | -0.84 | 0.85  | -0.82 | -1.07 | 0.49  | 0.69  |
| Q13042     | Cell division cycle protein 16 homolog                                    | CDC16    | 0.14 | 1.42 | -1.27 | -1.43 | -0.59 | 1.34  | 0.45  | 0.36  | -0.85 | 1.32  | 0.06  | 0.63  |
| P26358     | DNA (cytosine-5)-methyltransferase 1                                      | DNMT1    | 0.14 | 0.21 | -0.83 | -0.75 | -0.43 | 0.16  | 1.56  | -0.57 | -1.44 | 1.45  | 0.09  | 0.77  |
| P46937     | Transcriptional coactivator YAP1                                          | YAP1     | 0.14 | 0.10 | -1.15 | 1.00  | -1.38 | 0.82  | 0.57  | -1.26 | -0.15 | -0.42 | 0.88  | 1.09  |
| Q9UKK3     | Protein mono-ADP-ribosyltransferase PARP4                                 | PARP4    | 0.14 | 0.32 | 2.15  | -0.77 | -0.15 | -0.01 | -1.67 | 0.57  | -0.65 | 0.00  | 0.02  | 0.50  |
| Q96FN4     | Copine-2                                                                  | CPNE2    | 0.14 | 0.11 | -0.03 | -0.17 | -0.35 | 0.59  | -0.21 | 1.16  | -2.51 | 0.65  | 0.48  | 0.39  |
| Q9P1Z2     | Calcium-binding and coiled-coil domain-containing protein 1               | CALCOCO1 | 0.14 | 0.14 | 0.33  | 1.34  | -0.58 | 0.08  | -1.37 | 1.03  | 0.80  | -1.78 | 0.11  | 0.04  |
| P29966     | Myristoylated alanine-rich C-kinase substrate                             | MARCKS   | 0.14 | 0.31 | -0.37 | -0.33 | 1.85  | -1.41 | 0.04  | 0.65  | 0.43  | 0.35  | -1.48 | 0.47  |
| O00571     | ATP-dependent RNA helicase DDX3X                                          | DDX3X    | 0.14 | 0.75 | 0.87  | 0.10  | -0.20 | -0.22 | -1.47 | 1.48  | -0.28 | -1.36 | -0.26 | 1.34  |
| Q6UWR7     | Ectonucleotide pyrophosphatase/phosphodiesterase family member ENPP6      | ENPP6    | 0.14 | 0.14 | -0.03 | -0.01 | 0.15  | 0.41  | -0.72 | 0.75  | -2.34 | 1.25  | 0.80  | -0.25 |
| Q5VWX1     | KH domain-containing, RNA-binding, signal transduction-associate KHDRBS2  | KHDRBS2  | 0.14 | 0.24 | 1.27  | -0.28 | -0.71 | -0.28 | -0.33 | 2.32  | -0.43 | -0.92 | -0.29 | -0.35 |
| Q9BQ17     | PH and SEC7 domain-containing protein 2                                   | PSD2     | 0.14 | 0.27 | -1.72 | 0.89  | 0.16  | 0.71  | -0.40 | 0.19  | -0.58 | -1.37 | 0.93  | 1.20  |
| P02794     | Ferritin heavy chain                                                      | FTHL     | 0.14 | 0.29 | -0.96 | -0.89 | -0.81 | 0.05  | 2.20  | -0.88 | 0.10  | 0.88  | 0.45  | -0.14 |
| Q02218     | 2-oxoglutarate dehydrogenase, mitochondrial                               | OGDH     | 0.14 | 0.21 | 0.14  | -0.18 | 1.61  | -1.03 | -0.83 | 0.45  | 1.75  | -0.84 | -0.70 | -0.37 |
| P52788     | Spermine synthase                                                         | SMS      | 0.14 | 0.27 | -1.78 | 0.15  | 0.69  | 0.35  | 0.21  | 1.08  | -1.65 | -0.46 | 0.52  | 0.89  |
| Q9C0C9     | (E3-independent) E2 ubiquitin-conjugating enzyme                          | UBE2O    | 0.14 | 0.37 | -0.08 | 1.92  | -1.56 | 0.28  | -1.06 | -0.01 | 0.76  | 0.64  | -0.07 | -0.81 |
| P34897     | Serine hydroxymethyltransferase, mitochondrial                            | SHMT2    | 0.14 | 0.11 | -0.83 | 0.16  | 0.78  | 0.62  | -0.90 | -0.80 | -0.86 | 2.01  | -0.82 | 0.64  |
| P11047     | Laminin subunit gamma-1                                                   | LAMC1    | 0.14 | 0.41 | -0.80 | 0.13  | 0.98  | -0.16 | -0.70 | -0.90 | -0.80 | 2.26  | 0.40  | -0.41 |
| P48047     | ATP synthase subunit O, mitochondrial                                     | ATP5PO   | 0.14 | 0.21 | 1.69  | -0.60 | -0.22 | -0.52 | -0.64 | 1.29  | 1.24  | -1.05 | -0.73 | -0.46 |
| O95219     | Sorting nexin-4                                                           | SNX4     | 0.14 | 0.18 | 1.22  | 1.32  | -0.19 | -0.92 | -1.69 | -0.04 | 0.86  | -0.92 | -0.25 | 0.61  |
| Q9BTD8     | RNA-binding protein 42                                                    | RBM42    | 0.13 | 0.13 | 0.11  | -0.26 | -0.35 | 0.35  | -0.04 | -0.10 | -2.39 | 1.48  | 0.67  | 0.53  |
| Q53FT3     | Protein HIKeshi                                                           | HIKESH1  | 0.13 | 0.12 | 1.01  | -1.07 | -1.28 | 0.46  | 0.71  | 1.04  | 0.67  | 0.69  | -1.12 | -1.10 |
| Q8ND71     | GTPase IMAP family member 8                                               | GIMAP8   | 0.13 | 0.16 | -0.87 | 0.84  | -1.92 | 0.99  | 0.73  | -0.85 | -0.60 | 0.66  | 0.89  | 0.13  |
| Q13572     | Inositol-tetrakisphosphate 1-kinase                                       | ITPK1    | 0.13 | 0.26 | -2.07 | 0.61  | -0.26 | 0.53  | 0.82  | 0.14  | -1.46 | 0.17  | 0.84  | 0.66  |
| O96028     | Histone-lysine N-methyltransferase NSD2                                   | NSD2     | 0.13 | 0.16 | -0.21 | -0.43 | -0.68 | 1.53  | -0.45 | -0.37 | 2.17  | -0.72 | -0.48 | -0.37 |
| Q7L9L4     | MOB kinase activator 1B                                                   | MOB1B    | 0.13 | 0.39 | -0.30 | -1.39 | 1.75  | 0.08  | -0.67 | 0.11  | -1.17 | 1.44  | 0.08  | 0.06  |
| Q9NXC5     | GATOR complex protein MIOS                                                | MIOS     | 0.13 | 0.14 | -0.53 | -0.45 | -0.66 | 0.86  | 0.57  | -1.23 | -1.41 | 1.62  | 0.88  | 0.34  |
| Q5JR12     | Protein phosphatase 1J                                                    | PPM1J    | 0.13 | 0.27 | -0.11 | 1.68  | -0.74 | -0.55 | -0.65 | 1.36  | -0.20 | -1.21 | -0.63 | 1.06  |
| Q9BSQ5     | Cerebral cavernous malformations 2 protein                                | CCM2     | 0.13 | 0.17 | 0.32  | -0.52 | 0.60  | 0.91  | -1.56 | -1.76 | -0.27 | 0.55  | 0.75  | 0.99  |
| Q969Q0     | 60S ribosomal protein L36a-like                                           | RPL36AL  | 0.13 | 0.54 | -0.55 | -0.86 | 1.03  | -0.26 | -0.05 | -0.23 | 1.67  | -1.45 | -0.56 | 1.26  |
| Q6Y7W6     | GRB10-interacting GYF protein 2                                           | GIGYF2   | 0.13 | 0.09 | 0.30  | -0.13 | -1.51 | 0.43  | 0.78  | 0.83  | 1.41  | -1.58 | 0.24  | -0.77 |
| O43464     | Serine protease HTRA2, mitochondrial                                      | HTRA2    | 0.13 | 0.31 | -0.27 | -0.44 | 1.92  | -1.47 | -0.15 | 0.31  | -1.33 | 0.68  | 0.01  | 0.75  |
| Q12972     | Nuclear inhibitor of protein phosphatase 1                                | PPP1R8   | 0.13 | 0.10 | 1.02  | -1.29 | -1.37 | 0.78  | 0.71  | 0.30  | 0.41  | -1.55 | 0.79  | 0.20  |
| Q5JTJ3     | Cytochrome c oxidase assembly factor 6 homolog                            | COA6     | 0.13 | 0.12 | -1.06 | 1.05  | -0.05 | -1.09 | 0.98  | -1.18 | -1.09 | 0.70  | 0.79  | 0.96  |
| Q9Y4I1     | Unconventional myosin-Va                                                  | MYO5A    | 0.13 | 0.11 | 1.38  | 0.17  | -0.99 | -0.27 | -0.45 | 1.09  | 1.49  | -1.33 | -0.40 | -0.68 |
| Q13546     | Receptor-interacting serine/threonine-protein kinase 1                    | RIPK1    | 0.13 | 0.14 | 0.09  | 1.61  | -0.64 | -0.45 | -0.82 | 1.64  | -0.05 | -1.22 | -0.76 | 0.59  |
| P54619     | 5'-AMP-activated protein kinase subunit gamma-1                           | PRKAG1   | 0.13 | 0.11 | 0.46  | 0.29  | -1.87 | 0.47  | 0.48  | -1.68 | -0.33 | 0.30  | 0.89  | 0.97  |
| Q969E8     | Pre-rRNA-processing protein TSR2 homolog                                  | TSR2     | 0.13 | 0.14 | 1.16  | 0.43  | -1.03 | 0.75  | -1.52 | 0.15  | 0.34  | -1.59 | 0.64  | 0.66  |
| Q9NZ01     | Very-long-chain enoyl-CoA reductase                                       | TECR     | 0.13 | 0.17 | -1.45 | -0.22 | -0.56 | 0.91  | 1.08  | -0.95 | -0.87 | -0.30 | 1.07  | 1.29  |
| P52756     | RNA-binding protein 5                                                     | RBM5     | 0.13 | 0.16 | 0.90  | 0.19  | -2.54 | 0.15  | 1.07  | -0.11 | 0.18  | -0.49 | 0.46  | 0.19  |
| Q9HQ31     | Cdc42 effector protein 4                                                  | CDC42EP4 | 0.12 | 0.20 | 0.46  | 1.22  | -1.05 | -0.77 | -0.14 | 1.48  | -1.05 | -1.27 | 0.39  | 0.73  |
| P30040     | Endoplasmic reticulum resident protein 29                                 | ERP29    | 0.12 | 0.15 | 0.21  | -0.54 | 0.68  | -0.09 | -0.49 | -1.38 | -1.21 | 1.98  | 0.03  | 0.80  |
| Q86SK9     | Stearyl-CoA desaturase 5                                                  | SCD5     | 0.12 | 0.14 | -0.80 | -0.79 | 0.34  | 1.27  | -0.22 | -0.07 | -0.91 | -1.37 | 1.26  | 1.30  |
| Q92828     | Coronin-2A                                                                | CORO2A   | 0.12 | 0.24 | 0.34  | 1.52  | -0.29 | 0.47  | -2.37 | 0.36  | 0.39  | -0.47 | 0.31  | -0.27 |
| P40616     | ADP-ribosylation factor-like protein 1                                    | ARL1     | 0.12 | 0.17 | 0.15  | -2.10 | 0.70  | 0.09  | 0.93  | -1.17 | -0.60 | 0.77  | 0.38  | 0.86  |
| P63151     | Serine/threonine-protein phosphatase 2A 55 kDa regulatory subunit PPP2R2A | PPP2R2A  | 0.12 | 0.34 | -1.11 | -1.38 | -0.40 | 1.39  | 1.03  | -0.76 | -0.34 | -0.32 | 1.22  | 0.65  |
| Q96C19     | EF-hand domain-containing protein D2                                      | EFHD2    | 0.12 | 0.28 | 1.11  | -0.79 | -0.07 | -1.52 | 0.89  | 1.04  | 0.84  | 0.34  | -1.40 | -0.44 |
| P05109     | Protein S100-A8                                                           | S100A8   | 0.12 | 0.08 | -1.05 | 0.85  | -1.26 | 0.55  | 0.80  | -1.17 | -1.10 | 1.14  | 0.55  | 0.69  |
| Q9Y6R0     | Numb-like protein                                                         | NUMBL    | 0.12 | 0.30 | 1.21  | 0.12  | -1.50 | -0.15 | 0.20  | 0.66  | 1.49  | -1.56 | -0.19 | -0.28 |
| O00764     | Pyridoxal kinase                                                          | PDXK     | 0.12 | 0.08 | -0.03 | 1.24  | -1.23 | 0.78  | -1.17 | 0.93  | -0.09 | -1.55 | 0.36  | 0.75  |
| Q01814     | Plasma membrane calcium-transporting ATPase 2                             | ATP2B2   | 0.12 | 0.16 | 1.05  | 0.17  | -1.36 | -0.61 | 0.52  | 1.70  | 0.78  | -0.95 | -0.40 | -0.91 |
| Q15424     | Scaffold attachment factor B1                                             | SAFB     | 0.12 | 0.18 | 0.75  | -0.12 | 0.01  | -0.20 | -0.69 | 1.70  | -1.20 | -1.08 | -0.61 | 1.43  |
| P61964     | WD repeat-containing protein 5                                            | WDR5     | 0.12 | 0.11 | 1.72  | -0.30 | -1.11 | -0.02 | -0.45 | 1.64  | -0.85 | -0.99 | 0.03  | 0.34  |
| Q9Y4W6     | AFG3-like protein 2                                                       | AFG3L2   | 0.12 | 0.09 | -1.59 | 0.91  | 0.94  | 0.49  | -0.89 | -1.31 | -0.61 | 0.42  | 0.58  | 1.05  |



|            |                                                                            |          |      |      |       |       |       |       |       |       |       |       |       |       |
|------------|----------------------------------------------------------------------------|----------|------|------|-------|-------|-------|-------|-------|-------|-------|-------|-------|-------|
| P26196     | Probable ATP-dependent RNA helicase DDX6                                   | DDX6     | 0.11 | 0.54 | -1.12 | -1.71 | 1.36  | 0.59  | 0.17  | -0.31 | 0.00  | -0.47 | -0.04 | 1.51  |
| P51674     | Neuronal membrane glycoprotein M6-a                                        | GPM6A    | 0.11 | 0.19 | 0.09  | 1.02  | -2.06 | 0.71  | -0.04 | -0.84 | -0.46 | 1.13  | 0.90  | -0.45 |
| Q8WV73     | Trafficking protein particle complex subunit 12                            | TRAPPC12 | 0.11 | 0.13 | -0.42 | 2.04  | -0.72 | -0.56 | -0.54 | -0.84 | -0.57 | -0.87 | 0.82  | 1.25  |
| P60033     | CD81 antigen                                                               | CD81     | 0.11 | 0.31 | -0.13 | 0.99  | 0.17  | 0.21  | -1.66 | -0.61 | -1.08 | 1.84  | 0.46  | -0.19 |
| Q14683     | Structural maintenance of chromosomes protein 1A                           | SMC1A    | 0.11 | 0.21 | -0.18 | -0.59 | -0.67 | 1.76  | -0.62 | -0.55 | -1.01 | 1.47  | 0.94  |       |
| P61163     | Alpha-centractin                                                           | ACTR1A   | 0.11 | 0.23 | 0.40  | -0.68 | 0.48  | 0.62  | -1.14 | 0.89  | -2.18 | 0.55  | 0.47  | 0.60  |
| P75110     | Probable phospholipid-transporting ATPase IIA                              | ATP9A    | 0.11 | 0.13 | 0.57  | 0.34  | 0.01  | 0.70  | -1.82 | 1.07  | -0.19 | -1.73 | 0.66  | 0.39  |
| O95486     | Protein transport protein Sec24A                                           | SEC24A   | 0.11 | 0.12 | 0.29  | 0.21  | -1.05 | 0.68  | -0.30 | 0.27  | -0.21 | -2.08 | 0.69  | 1.51  |
| P09417     | Dihydropteridine reductase                                                 | QDPR     | 0.11 | 0.20 | -0.52 | -1.10 | 1.23  | 0.70  | -0.59 | -1.07 | -0.06 | 1.62  | 0.72  | -0.93 |
| Q96HN2     | Adenosylhomocysteinase 3                                                   | AHCYL2   | 0.11 | 0.37 | 0.32  | -1.07 | -0.53 | -0.17 | 0.95  | -1.68 | -0.19 | 1.80  | -0.09 | 0.66  |
| Q9Y3U8     | 60S ribosomal protein L36                                                  | RPL36    | 0.11 | 0.14 | -0.07 | -2.04 | -0.50 | 0.49  | 1.91  | -0.38 | -0.26 | 0.30  | 0.61  | -0.07 |
| P55268     | Laminin subunit beta-2                                                     | LAMB2    | 0.11 | 0.25 | 0.48  | -1.95 | 0.28  | -0.17 | 1.01  | 0.75  | 0.33  | -1.62 | 0.16  | 0.73  |
| Q96PU5     | E3 ubiquitin-protein ligase NEDD4-like                                     | NEDD4L   | 0.11 | 0.11 | 0.72  | 1.13  | -0.21 | 0.58  | -2.38 | -0.03 | 0.35  | -0.88 | 0.42  | 0.30  |
| Q9NSY0     | Nuclear receptor-binding protein 2                                         | NRBP2    | 0.11 | 0.22 | 0.07  | 0.62  | -0.81 | 0.54  | -0.73 | 1.64  | 0.29  | -2.05 | 0.03  | 0.40  |
| Q8WX93     | Palladin                                                                   | PALLD    | 0.11 | 0.26 | -0.38 | 0.69  | 0.24  | 0.01  | -0.93 | 1.64  | 0.17  | -2.12 | 0.22  | 0.44  |
| Q9BYW2     | Histone-lysine N-methyltransferase SETD2                                   | SETD2    | 0.11 | 0.12 | -0.76 | 1.10  | -1.07 | 0.65  | -0.10 | -0.38 | -0.79 | -1.15 | 0.78  | 1.71  |
| O95741     | Copine-6                                                                   | CPNE6    | 0.11 | 0.27 | -0.55 | 1.24  | -0.62 | 0.49  | -0.92 | 0.95  | -0.56 | -1.69 | 0.51  | 1.17  |
| P20020     | Plasma membrane calcium-transporting ATPase 1                              | ATP2B1   | 0.11 | 0.22 | 0.02  | 1.72  | 0.12  | -0.79 | -1.37 | 0.44  | 1.09  | -1.15 | -0.68 | 0.61  |
| Q5HY18     | Rab-like protein 3                                                         | RABL3    | 0.11 | 0.11 | 0.60  | 0.24  | -1.96 | 0.55  | 0.40  | 0.48  | 0.25  | -1.80 | 0.52  | 0.70  |
| Q9Y619     | Testis-expressed protein 264                                               | TEX264   | 0.11 | 0.13 | 0.22  | 1.39  | -0.91 | -0.78 | -0.11 | 1.59  | -0.65 | -1.09 | -0.65 | 0.99  |
| Q96G03     | Phosphoglucomutase-2                                                       | PGM2     | 0.11 | 0.10 | -1.73 | 0.54  | 0.23  | 0.47  | 0.35  | -0.82 | -1.41 | 0.51  | 1.51  | 0.34  |
| Q969P0     | Immunoglobulin superfamily member 8                                        | IGSF8    | 0.11 | 0.13 | -0.43 | -0.37 | 0.40  | 1.15  | -0.95 | -0.93 | -1.20 | 1.53  | 1.21  | -0.41 |
| Q9UJ41     | Rab5 GDP/GTP exchange factor                                               | RABGEF1  | 0.11 | 0.10 | -1.45 | -0.04 | 1.69  | -0.40 | 0.06  | -0.81 | -1.08 | 1.32  | 0.52  | 0.19  |
| O43290     | U4/U6.U5 tri-snRNP-associated protein 1                                    | SART1    | 0.11 | 0.32 | -0.61 | 0.37  | -1.14 | 0.39  | 0.56  | -1.37 | 1.75  | -1.02 | 0.27  | 0.81  |
| Q8NBF6     | Late secretory pathway protein AVL9 homolog                                | AVL9     | 0.11 | 0.21 | -0.04 | 0.54  | -0.18 | -0.44 | -0.18 | 2.47  | 0.14  | -0.40 | -0.56 | -1.35 |
| Q15691     | Microtubule-associated protein RP/EB family member 1                       | MAPRE1   | 0.11 | 0.38 | -1.61 | -0.80 | 0.24  | 0.46  | 1.21  | 0.93  | -1.52 | -0.20 | 0.64  | 0.66  |
| Q71UM5     | 40S ribosomal protein S27-like                                             | RPS27L   | 0.11 | 0.38 | 1.08  | -1.34 | -0.50 | 0.63  | -0.38 | 1.00  | 0.90  | -1.44 | -0.80 | 0.84  |
| P55735     | Protein SEC13 homolog                                                      | SEC13    | 0.10 | 0.25 | 0.90  | 1.08  | -1.52 | 0.20  | -1.01 | 0.18  | 0.04  | -1.47 | 0.53  | 1.07  |
| Q86XK2     | F-box only protein 11                                                      | FBXO11   | 0.10 | 0.16 | -0.28 | -0.64 | -0.95 | 1.49  | 0.14  | -0.66 | -0.47 | -1.04 | 1.82  | 0.58  |
| Q15582     | Transforming growth factor-beta-induced protein ig-h3                      | TGFB1    | 0.10 | 0.10 | -0.37 | -0.55 | 1.78  | -0.44 | -0.57 | -0.54 | -0.47 | 2.00  | -0.44 | -0.40 |
| AP9915     | GMP synthase [glutamine-hydrolyzing]                                       | GMPS     | 0.10 | 0.64 | 1.12  | -0.77 | -1.44 | 0.45  | -0.16 | 0.13  | -1.63 | 1.29  | 0.49  | 0.53  |
| P54289     | Voltage-dependent calcium channel subunit alpha-2/delta-1                  | CACNA2D1 | 0.10 | 0.10 | 0.46  | 1.46  | -1.16 | 0.13  | -1.05 | 0.05  | 0.43  | 1.51  | -0.87 | -0.98 |
| P61266     | Syntaxin-1B                                                                | STX1B    | 0.10 | 0.26 | -0.93 | 2.22  | -0.50 | -0.04 | -1.12 | -0.53 | 0.84  | -0.67 | 0.50  | 0.22  |
| Q969V6     | Myocardin-related transcription factor A                                   | MRTFA    | 0.10 | 0.07 | 0.98  | 0.63  | -1.07 | 0.32  | -0.96 | 0.33  | 1.93  | -0.53 | -0.70 | -0.93 |
| Q9Y6A2     | Cholesterol 24-hydroxylase                                                 | CYP46A1  | 0.10 | 0.31 | 0.00  | -0.32 | 0.19  | 0.40  | -0.69 | -1.76 | -0.31 | 2.19  | 0.46  | -0.15 |
| Q96F86     | Enhancer of mRNA-decapping protein 3                                       | EDC3     | 0.10 | 0.14 | 1.87  | -1.46 | -0.78 | 0.59  | -0.43 | 0.49  | 0.98  | -0.76 | 0.15  | -0.66 |
| Q8NEZ4     | Histone-lysine N-methyltransferase 2C                                      | KMT2C    | 0.10 | 0.08 | 1.00  | -0.74 | -0.85 | 1.25  | -0.78 | 1.32  | -0.71 | -0.91 | 1.05  | -0.63 |
| O15226     | NF-kappa-B-repressing factor                                               | NKRF     | 0.10 | 0.09 | -0.33 | -0.81 | 1.28  | -0.72 | 0.44  | -0.71 | 2.15  | -0.15 | -0.41 | -0.75 |
| O75153     | Clustered mitochondria protein homolog                                     | CLUH     | 0.10 | 0.24 | -0.66 | 1.03  | -0.34 | -0.38 | 0.01  | 1.41  | -0.33 | -2.01 | 0.25  | 1.02  |
| P33121     | Long-chain-fatty-acid--CoA ligase 1                                        | ACSL1    | 0.10 | 0.08 | -1.18 | 0.55  | -0.13 | 0.71  | -0.06 | -1.21 | -1.22 | 0.04  | 0.66  | 1.84  |
| P52564     | Dual specificity mitogen-activated protein kinase kinase 6                 | MAP2K6   | 0.10 | 0.13 | 0.13  | 0.88  | -0.14 | -0.16 | -0.91 | -0.11 | -1.98 | 1.77  | -0.01 | 0.52  |
| Q9HAP6     | Protein lin-7 homolog B                                                    | LIN7B    | 0.10 | 0.11 | 1.64  | -0.40 | -0.56 | -0.42 | -0.42 | -0.39 | 2.11  | -0.73 | -0.47 | -0.36 |
| Q6X4W1     | NMDA receptor synaptonuclear signaling and neuronal migration factor 1     | NSMF     | 0.10 | 0.11 | 2.11  | -0.51 | -0.65 | -0.50 | -0.61 | -0.40 | 1.14  | -0.88 | 0.85  | -0.54 |
| O15069     | NAC-alpha domain-containing protein 1                                      | NACAD    | 0.10 | 0.16 | 0.60  | -1.36 | 1.90  | -0.03 | -1.35 | -0.51 | 0.39  | 0.79  | 0.13  | -0.56 |
| P14735     | Insulin-degrading enzyme                                                   | IDE      | 0.10 | 0.13 | -0.78 | 0.62  | 0.29  | 0.55  | -0.86 | -0.75 | 0.95  | 0.57  | -0.80 | 2.11  |
| Q8TB24     | Ras and Rab interactor 3                                                   | RIN3     | 0.10 | 0.22 | 0.01  | 1.70  | -0.92 | -0.64 | -0.46 | -0.41 | -0.50 | -1.17 | 1.23  | 1.16  |
| Q96AQ6     | Pre-B-cell leukemia transcription factor-interacting protein 1             | PBXIP1   | 0.10 | 0.14 | -0.49 | -0.63 | -0.35 | 0.77  | 0.51  | 0.85  | -2.38 | 0.46  | 0.61  | 0.65  |
| P18085     | ADP-ribosylation factor 4                                                  | ARF4     | 0.10 | 0.32 | -0.58 | 0.67  | -0.76 | 0.92  | -0.69 | 0.36  | -0.21 | -1.92 | 1.15  | 1.06  |
| Q9H7P6     | Multivesicular body subunit 12B                                            | MVB12B   | 0.10 | 0.11 | -1.73 | -0.46 | 0.73  | 1.28  | 0.02  | 0.75  | -1.20 | -0.69 | 1.03  | 0.26  |
| P35237     | Serpin B6                                                                  | SERPINB6 | 0.09 | 0.10 | -0.66 | 1.15  | 0.07  | 0.26  | -0.97 | 0.32  | -2.04 | 1.35  | 0.19  | 0.33  |
| Q9ULC3     | Ras-related protein Rab-23                                                 | RAB23    | 0.09 | 0.33 | 0.08  | 1.15  | -0.63 | 0.03  | -1.09 | 2.11  | -0.46 | -1.17 | 0.17  | -0.18 |
| P51808     | Dynein light chain Tctex-type 3                                            | DYNLT3   | 0.09 | 0.13 | -0.52 | -1.95 | 0.38  | 0.84  | 1.07  | -0.36 | -1.19 | 0.32  | 0.34  | 1.09  |
| Q53EL6     | Programmed cell death protein 4                                            | PDCD4    | 0.09 | 0.10 | 0.22  | -0.08 | -1.20 | 0.97  | -0.06 | 0.57  | -1.03 | -1.42 | 0.28  | 1.75  |
| Q9HB10     | Gamma-parvin                                                               | PARVG    | 0.09 | 0.08 | 1.70  | -0.72 | 0.18  | -0.55 | -0.73 | 1.54  | 0.80  | -0.91 | -0.66 | -0.65 |
| P19634     | Sodium/hydrogen exchanger 1                                                | SLC9A1   | 0.09 | 0.10 | -1.47 | 1.36  | -0.41 | 1.06  | -0.69 | -0.65 | 0.17  | -1.11 | 0.78  | 0.97  |
| P49770     | Translation initiation factor eIF-2B subunit beta                          | EIF2B2   | 0.09 | 0.11 | 1.35  | 0.32  | -1.15 | 0.51  | -1.18 | 1.13  | -0.52 | -1.36 | 0.08  | 0.82  |
| Q8WVC0     | RNA polymerase-associated protein LEO1                                     | LEO1     | 0.09 | 0.11 | 0.06  | 1.02  | -2.12 | 0.83  | 0.04  | 0.24  | 0.38  | -0.93 | 1.13  | -0.66 |
| Q8IW19     | MAX gene-associated protein                                                | MGA      | 0.09 | 0.11 | -1.94 | -0.37 | 0.57  | 0.56  | 1.01  | 0.86  | -0.17 | -1.48 | 0.52  | 0.43  |
| Q12974     | Protein tyrosine phosphatase type IVA 2                                    | PTP4A2   | 0.09 | 0.06 | 1.21  | -0.08 | 0.26  | -0.36 | -1.12 | 1.45  | 1.07  | -1.34 | -0.08 | -1.02 |
| Q99572     | P2X purinoceptor 7                                                         | P2RX7    | 0.09 | 0.22 | -0.17 | -0.66 | 1.72  | -0.58 | -0.62 | -0.68 | -0.75 | 0.57  | 1.77  | -0.60 |
| P36543     | V-type proton ATPase subunit E 1                                           | ATP6V1E1 | 0.09 | 0.27 | 0.01  | 1.07  | -0.19 | 0.84  | -2.10 | -0.76 | -0.55 | 1.23  | 0.53  | -0.07 |
| Q7L3B6     | Hsp90 co-chaperone Cdc37-like 1                                            | CDC37L1  | 0.09 | 0.11 | -0.18 | 1.51  | -0.61 | -0.46 | -0.41 | -0.35 | -0.38 | -0.82 | -0.47 | 2.18  |
| Q9P215     | Pogo transposable element with KRAB domain                                 | POGK     | 0.09 | 0.10 | 1.02  | -0.91 | -1.09 | -0.13 | 0.96  | 0.61  | 1.28  | -1.42 | 0.51  | -0.83 |
| Q15714     | TSC22 domain family protein 1                                              | TSC22D1  | 0.09 | 0.05 | -1.46 | 0.78  | -1.02 | 0.70  | 0.93  | -0.38 | -1.53 | 0.47  | 0.77  | 0.76  |
| Q8TDX7     | Serine/threonine-protein kinase Nek7                                       | NEK7     | 0.09 | 0.10 | 0.81  | 0.42  | -1.55 | 0.37  | -0.20 | 1.07  | -1.71 | -0.64 | 0.49  | 0.94  |
| P26641     | Elongation factor 1-gamma                                                  | EEF1G    | 0.09 | 0.19 | 0.89  | -0.18 | 0.91  | -0.21 | -1.68 | 0.99  | 0.78  | -1.67 | -0.13 | 0.30  |
| Q8WU90     | Zinc finger CCCH domain-containing protein 15                              | ZC3H15   | 0.09 | 0.20 | 1.39  | -0.25 | -1.68 | 0.49  | -0.23 | 0.41  | -0.29 | -1.51 | 0.91  | 0.75  |
| Q9Y3D6     | Mitochondrial fission 1 protein                                            | FIS1     | 0.09 | 0.20 | 0.00  | 0.08  | -0.99 | -0.52 | 1.15  | -0.84 | -1.69 | 0.54  | 1.12  | 1.15  |
| Q6P587     | Acylpyruvase FAHDL1, mitochondrial                                         | FAHDL1   | 0.09 | 0.08 | -0.28 | -0.49 | -0.62 | -0.53 | 1.81  | -0.47 | -0.49 | 1.97  | -0.43 | -0.47 |
| P43304     | Glycerol-3-phosphate dehydrogenase, mitochondrial                          | GPD2     | 0.09 | 0.22 | -0.07 | 0.13  | -0.97 | -0.49 | 1.09  | -0.35 | 1.84  | -1.30 | -0.78 | 0.90  |
| AOA08432D5 | Glutamine amidotransferase-like class 1 domain-containing protein          | GATD3B   | 0.09 | 0.33 | -0.62 | 0.04  | 1.39  | -1.30 | 0.05  | 1.95  | -0.35 | -0.14 | -1.03 | 0.02  |
| P22314     | Ubiquitin-like modifier-activating enzyme 1                                | UBA1     | 0.08 | 0.12 | -2.35 | 0.43  | 0.13  | 1.00  | 0.61  | -0.43 | 0.35  | -0.86 | 0.91  | 0.21  |
| Q96JG6     | Syndetin                                                                   | VPSS0    | 0.08 | 0.11 | -0.19 | 1.58  | 0.21  | -1.41 | -0.35 | -1.32 | 0.58  | 0.66  | -0.82 | 1.06  |
| Q969G3     | SWI/SNF-related matrix-associated actin-dependent regulator of chromatin 1 | SMARCE1  | 0.08 | 0.11 | -0.19 | -0.50 | -0.52 | 1.62  | -0.57 | -0.44 | -0.45 | -0.72 | -0.34 | 2.12  |
| Q16718     | NADH dehydrogenase [ubiquinone] 1 alpha subcomplex subunit 5               | NDUFAS5  | 0.08 | 0.35 | 0.70  | -0.03 | -0.84 | -0.28 | -0.03 | 0.24  | -0.47 | -1.52 | -0.04 | 2.27  |
| P02748     | Complement component C9                                                    | C9       | 0.08 | 0.07 | -0.58 | -0.10 | -0.75 | 0.53  | 0.80  | -0.72 | -0.66 | -0.95 | 0.14  | 2.30  |
| P41222     | Prostaglandin-H2 D-isomerase                                               | PTGDS    | 0.08 | 0.08 | -0.52 | -1.02 | 1.23  | 0.21  | -0.01 | -0.65 | -1.44 | 1.84  | 0.47  | -0.11 |
| P07948     | Tyrosine-protein kinase Lyn                                                | LYN      | 0.08 | 0.12 | -1.97 | 1.40  | -0.22 | 0.56  | -0.38 | -0.48 | -1.06 | 0.14  | 0.61  | 0.96  |
| P46060     | Ran GTPase-activating protein 1                                            | RANGAP1  | 0.08 | 0.12 | 1.20  | -0.21 | 1.31  | -1.12 | 1.27  | 0.80  | 0.82  | -0.18 | -1.25 | -0.01 |
| Q9NX58     | Cell growth-regulating nucleolar protein                                   | LYAR     | 0.08 | 0.12 | -0.85 | 0.63  | 1.80  | -1.28 | -0.48 | -0.81 | -0.64 | 0.15  | 0.19  | 1.28  |
| Q9CS3      | FAS-associated factor 2                                                    | FAF2     | 0.08 | 0.12 | 0.65  | 0.92  | -1.66 | 0.48  | -0.55 | 0.83  | -1.79 | 0.07  | 0.54  |       |
| Q53G44     | Interferon-induced protein 44-like                                         | IFI44L   | 0.08 | 0.11 | 1.02  | -1.09 | -1.44 | 0.71  | 0.65  | -0.46 | 1.62  | -0.01 | -0.02 | -0.97 |
| P35754     | Glutaredoxin-1                                                             | GLRX     | 0.08 | 0.06 | -0.52 | 0.00  | -0.67 | -0.62 | 1.72  | -0.61 | -0.11 | 1.97  | -0.54 | -0.62 |

|        |                                                                             |          |      |      |       |       |       |       |       |       |       |       |       |       |
|--------|-----------------------------------------------------------------------------|----------|------|------|-------|-------|-------|-------|-------|-------|-------|-------|-------|-------|
| Q93052 | Lipoma-preferred partner                                                    | LPP      | 0.08 | 0.08 | 0.11  | 0.85  | -1.27 | 0.28  | -0.08 | 1.25  | 0.02  | -2.00 | -0.14 | 0.98  |
| P49848 | Transcription initiation factor TFIID subunit 6                             | TAF6     | 0.08 | 0.36 | 0.55  | 0.04  | -0.94 | 0.19  | -0.33 | -0.30 | 0.08  | -1.45 | -0.18 | 2.34  |
| P25990 | Protein PML                                                                 | PML      | 0.08 | 0.12 | 0.45  | 0.24  | 1.06  | -0.74 | -1.17 | 0.39  | -1.64 | -0.73 | 1.13  | 1.02  |
| Q63HM9 | PI-PLC X domain-containing protein 3                                        | PLCXD3   | 0.08 | 0.08 | -1.10 | -0.50 | 0.64  | 0.40  | 0.44  | -1.36 | -1.29 | 1.58  | 0.42  | 0.77  |
| O14964 | Hepatocyte growth factor-regulated tyrosine kinase substrate                | HGS      | 0.08 | 0.15 | -0.03 | 1.20  | -0.27 | 0.56  | -1.68 | -0.07 | 1.33  | -1.48 | 0.59  | -0.14 |
| Q6G7Q0 | Ral GTPase-activating protein subunit alpha-1                               | RALGAPA1 | 0.08 | 0.06 | 1.10  | 0.71  | -1.81 | 0.02  | -0.11 | 0.68  | 1.24  | -1.38 | -0.20 | -0.25 |
| P78347 | General transcription factor II-I                                           | TFII     | 0.08 | 0.13 | -0.01 | 0.95  | -1.73 | 1.36  | -0.75 | -1.04 | -0.08 | -0.30 | 1.12  | 0.49  |
| P85037 | Forkhead box protein K1                                                     | FOXK1    | 0.08 | 0.10 | 0.29  | 1.09  | -1.10 | -0.89 | 0.46  | 1.69  | 0.71  | -1.17 | -0.85 | -0.25 |
| Q8N573 | Oxidation resistance protein 1                                              | OKR1     | 0.08 | 0.14 | 0.79  | 0.09  | -0.47 | -0.64 | 0.02  | 2.37  | 0.26  | -0.56 | -0.98 | -0.88 |
| P61204 | ADP-ribosylation factor 3                                                   | ARF3     | 0.08 | 0.21 | 0.69  | -1.98 | -0.70 | 0.96  | 0.73  | -1.07 | -0.27 | 0.64  | 1.01  | -0.02 |
| Q13045 | Protein flightless-1 homolog                                                | FLI1     | 0.08 | 0.15 | 0.79  | 1.17  | -1.61 | 0.25  | -0.82 | 0.88  | -0.13 | -1.52 | 0.28  | 0.71  |
| P07585 | Decorin                                                                     | DCN      | 0.08 | 0.11 | 0.80  | -0.03 | -0.88 | 0.78  | -0.84 | -2.10 | 0.07  | 0.69  | 0.42  | 1.09  |
| Q5T6J7 | Probable gluconokinase                                                      | IDNK     | 0.08 | 0.09 | 1.48  | -0.32 | -0.61 | -0.30 | -0.37 | 2.21  | -0.44 | -0.84 | -0.50 | -0.30 |
| O15111 | Inhibitor of nuclear factor kappa-B kinase subunit alpha                    | CHUK     | 0.08 | 0.09 | 0.63  | -0.31 | -1.61 | 1.31  | -0.15 | 0.86  | -0.08 | -1.68 | 0.68  | 0.35  |
| Q9Y3F4 | Serine-threonine kinase receptor-associated protein                         | STRAP    | 0.08 | 0.09 | 1.52  | -0.02 | -0.60 | -0.42 | -0.60 | 1.81  | 0.57  | -1.33 | -0.50 | -0.43 |
| Q14119 | Vascular endothelial zinc finger 1                                          | VEZF1    | 0.08 | 0.12 | 0.97  | -1.14 | -1.20 | 0.67  | 0.53  | 0.01  | -0.95 | 0.85  | 1.35  | -1.08 |
| Q9BYR9 | Keratin-associated protein 2-4                                              | KRTAP2-4 | 0.08 | 0.05 | -0.42 | 1.92  | -0.56 | -0.48 | -0.53 | -0.39 | -0.46 | 1.87  | -0.47 | -0.48 |
| P08195 | 4F2 cell-surface antigen heavy chain                                        | SLC3A2   | 0.07 | 0.12 | 0.58  | 0.73  | 0.78  | -0.04 | -2.24 | 0.83  | 0.53  | 0.40  | -0.55 | -1.03 |
| Q9UBQ0 | Vacuolar protein sorting-associated protein 29                              | VPS29    | 0.07 | 0.22 | -0.59 | 0.63  | -0.97 | -0.12 | 0.74  | 1.14  | 0.71  | -2.17 | 0.47  | 0.16  |
| Q7L266 | Isoaspartyl peptidase/L-asparaginase                                        | ASRGL1   | 0.07 | 0.08 | -0.38 | 0.20  | -0.06 | -0.52 | 0.64  | 0.37  | -1.64 | 2.22  | -0.48 | -0.36 |
| Q96519 | Methyltransferase-like 26                                                   | METTL26  | 0.07 | 0.10 | 1.37  | 1.00  | -0.58 | 0.23  | -2.17 | 0.04  | 0.39  | 0.16  | 0.39  | -0.82 |
| Q9UQ03 | Coronin-2B                                                                  | CORO2B   | 0.07 | 0.14 | 0.92  | -0.79 | -0.85 | 0.77  | -0.25 | 1.57  | 0.40  | -1.86 | -0.12 | 0.22  |
| Q13009 | T-lymphoma invasion and metastasis-inducing protein 1                       | TIAM1    | 0.07 | 0.06 | 1.25  | -0.01 | -1.24 | 0.11  | -0.20 | 0.73  | 1.35  | -1.86 | 0.00  | -0.14 |
| Q14194 | Dihydropyrimidine-related protein 1                                         | CRMP1    | 0.07 | 0.14 | 0.69  | -1.00 | -0.50 | -1.00 | 1.62  | 0.40  | 0.33  | 1.28  | -0.71 | -1.11 |
| O60826 | Coiled-coil domain-containing protein 22                                    | CCDC22   | 0.07 | 0.08 | 1.52  | -0.11 | -1.07 | 0.41  | -0.87 | 1.18  | 1.11  | -1.25 | -0.53 | -0.39 |
| Q00005 | Serine/threonine-protein phosphatase 2A 55 kDa regulatory subunit           | PPP2R2B  | 0.07 | 0.07 | 1.26  | -0.33 | -1.54 | 0.33  | 0.18  | 1.09  | 0.40  | -1.75 | 0.58  | -0.21 |
| P62263 | 40S ribosomal protein S14                                                   | RPS14    | 0.07 | 0.16 | 0.77  | -0.54 | 1.24  | -0.88 | -0.82 | 0.82  | 0.35  | -1.42 | -0.81 | 1.30  |
| P17252 | Protein kinase C alpha type                                                 | PRKCA    | 0.07 | 0.16 | 0.48  | -0.33 | -1.06 | 0.86  | -0.19 | 1.36  | -0.28 | -2.00 | 0.89  | 0.26  |
| Q9H299 | SH3 domain-binding glutamic acid-rich-like protein 3                        | SH3BGRL3 | 0.07 | 0.14 | 0.96  | 1.28  | -1.23 | 0.16  | -1.37 | 0.80  | 0.65  | -1.30 | -0.32 | 0.37  |
| Q9NTK5 | Obg-like ATPase 1                                                           | OLA1     | 0.07 | 0.17 | -0.46 | 0.77  | 0.64  | -0.49 | -0.69 | 1.11  | 0.89  | -2.10 | -0.37 | 0.71  |
| Q8N9N7 | Leucine-rich repeat-containing protein 57                                   | LRRCS7   | 0.07 | 0.17 | -0.27 | 1.27  | -2.33 | 0.40  | 0.70  | -0.05 | 0.79  | -0.65 | 0.36  | -0.20 |
| Q7L1Q6 | Basic leucine zipper and W2 domain-containing protein 1                     | BZWI     | 0.07 | 0.08 | 0.26  | 0.27  | -0.18 | 0.05  | -0.51 | 1.25  | -0.35 | -2.34 | 0.47  | 1.09  |
| Q14525 | Keratin, type I cuticular Ha3-II                                            | KRT3B    | 0.07 | 0.06 | -0.27 | 1.77  | -0.64 | -0.43 | -0.52 | -0.50 | -0.49 | 2.00  | -0.55 | -0.38 |
| Q9P246 | Stromal interaction molecule 2                                              | STIM2    | 0.07 | 0.11 | -0.24 | 1.53  | -0.55 | -0.41 | -0.49 | -0.39 | -0.34 | -0.88 | -0.39 | 2.16  |
| Q05469 | Hormone-sensitive lipase                                                    | LIPE     | 0.07 | 0.15 | -0.94 | -0.86 | 1.37  | -0.03 | 0.25  | -1.59 | -0.56 | 0.08  | 1.12  | 1.16  |
| P26885 | Peptidyl-prolyl cis-trans isomerase FKBP2                                   | FKBP2    | 0.07 | 0.07 | 0.74  | 0.95  | -1.60 | 0.25  | -0.45 | 1.02  | 0.10  | -1.83 | 0.40  | 0.41  |
| P61916 | NPC intracellular cholesterol transporter 2                                 | NPC2     | 0.07 | 0.06 | -0.43 | -0.51 | -0.05 | -0.56 | 1.47  | -0.54 | -0.50 | 2.22  | -0.63 | -0.47 |
| Q5J513 | Ras-specific guanine nucleotide-releasing factor RalGPS1                    | RALGPS1  | 0.07 | 0.11 | -0.28 | 1.60  | -0.54 | -0.49 | -0.44 | -0.45 | 2.12  | -0.82 | -0.31 | -0.39 |
| Q9NPQ8 | Syembryn-A                                                                  | RIC8A    | 0.07 | 0.10 | 0.24  | 1.07  | -1.67 | 0.79  | -0.58 | 1.04  | -0.07 | -1.62 | 0.43  | 0.36  |
| P61224 | Ras-related protein Rap-1b                                                  | RAP1B    | 0.07 | 0.28 | 0.07  | -2.45 | 0.33  | 0.23  | 1.42  | 0.15  | -0.51 | 0.22  | 0.68  | -0.16 |
| P48507 | Glutamate-cysteine ligase regulatory subunit                                | GCLM     | 0.07 | 0.13 | -0.39 | 0.75  | -0.02 | 0.81  | -1.33 | 1.40  | -1.21 | -1.08 | 1.13  | -0.06 |
| P02765 | Alpha-2-HS-glycoprotein                                                     | AHSG     | 0.07 | 0.07 | 0.96  | -0.43 | 0.72  | 0.33  | -1.68 | 0.65  | 0.54  | 0.96  | -0.44 | -1.62 |
| Q14498 | RNA-binding protein 39                                                      | RBM39    | 0.07 | 0.07 | 1.03  | -0.58 | -0.81 | -0.44 | 0.71  | 1.13  | 0.82  | -1.99 | -0.33 | 0.48  |
| Q15811 | Intersectin-1                                                               | ITSN1    | 0.07 | 0.10 | 1.51  | 0.13  | -1.08 | -0.34 | -0.37 | 1.27  | 1.11  | -1.40 | -0.18 | -0.66 |
| Q8IUD2 | ELKS/Rab6-interacting/CAST family member 1                                  | ERC1     | 0.07 | 0.16 | -1.48 | 0.64  | 0.97  | 0.13  | -0.49 | -0.71 | 1.37  | -1.49 | 0.47  | 0.59  |
| Q13315 | Serine-protein kinase ATM                                                   | ATM      | 0.07 | 0.09 | 1.09  | -0.10 | -2.28 | 1.01  | 0.14  | -0.44 | 0.73  | -0.68 | 0.62  | -0.09 |
| Q99447 | Ethanolamine-phosphate cytidyltransferase                                   | PCYT2    | 0.07 | 0.25 | -1.05 | -1.53 | 0.67  | 1.12  | 0.44  | -0.96 | -0.31 | -0.16 | 1.61  | 0.17  |
| P22695 | Cytochrome b-c1 complex subunit 2, mitochondrial                            | UQCRC2   | 0.07 | 0.19 | -0.68 | -0.87 | 2.30  | -0.41 | -0.61 | -1.00 | 0.05  | 0.91  | 0.32  | -0.01 |
| P20592 | Interferon-induced GTP-binding protein Mx2                                  | MX2      | 0.07 | 0.05 | 0.96  | 1.56  | -0.93 | -0.76 | -0.91 | 0.81  | 1.15  | -0.26 | -0.84 | -0.79 |
| Q99963 | Endophilin-A3                                                               | SH3GL3   | 0.07 | 0.13 | -0.22 | 0.07  | 1.53  | -0.27 | -1.30 | 0.39  | 1.41  | 0.18  | -0.18 | -1.63 |
| Q6IA69 | Glutamine-dependent NAD(+) synthetase                                       | NADSYN1  | 0.06 | 0.08 | -0.68 | -0.99 | 1.53  | 1.06  | -1.03 | -0.84 | -0.85 | 0.98  | 0.02  | 0.81  |
| Q7Z3U7 | Protein MON2 homolog                                                        | MON2     | 0.06 | 0.12 | -0.46 | 1.06  | -1.05 | 1.37  | -1.09 | 0.18  | -1.24 | -0.08 | 1.38  | -0.06 |
| Q9HCB6 | Spondin-1                                                                   | SPON1    | 0.06 | 0.14 | -0.83 | -0.77 | 0.80  | 0.01  | 0.58  | -0.60 | -0.99 | 2.19  | -0.71 | 0.31  |
| Q94827 | Pleckstrin homology domain-containing family G member 5                     | PLEKHG5  | 0.06 | 0.06 | 1.75  | -1.06 | -0.04 | -0.18 | -0.56 | -0.97 | -1.03 | 1.37  | -0.06 | 0.77  |
| O43815 | Striatin                                                                    | STRN     | 0.06 | 0.34 | -0.08 | 0.14  | -1.58 | -0.98 | 2.04  | 0.19  | 0.43  | 0.12  | 0.60  | -0.88 |
| Q15365 | Poly(rC)-binding protein 1                                                  | PCBP1    | 0.06 | 0.17 | 0.28  | 0.12  | -2.29 | 1.27  | 0.38  | 0.00  | -0.21 | -0.79 | 1.11  | 0.14  |
| P61803 | Dolichyl-diphosphooligosaccharide--protein glycosyltransferase subunit DAD1 | DAD1     | 0.06 | 0.06 | 0.75  | -1.15 | -1.30 | 1.07  | 0.54  | -1.04 | -1.11 | 0.78  | 0.71  | 0.76  |
| P61313 | 60S ribosomal protein L15                                                   | RPL15    | 0.06 | 0.06 | -0.82 | -1.48 | -0.01 | -0.13 | 2.35  | -0.32 | -0.32 | 0.63  | 0.02  | 0.08  |
| O75494 | Serine/arginine-rich splicing factor 10                                     | SRSF10   | 0.06 | 0.20 | -2.10 | -0.05 | 0.07  | 0.84  | 0.95  | -0.54 | 0.54  | -0.91 | 1.25  | -0.06 |
| Q96PU8 | Protein quaking                                                             | QKI      | 0.06 | 0.13 | 0.01  | -0.25 | -1.13 | 0.66  | 0.52  | 0.45  | -1.88 | -0.62 | 1.51  | 0.72  |
| Q14240 | Eukaryotic initiation factor 4A-II                                          | EIF4A2   | 0.06 | 0.18 | 0.07  | -1.03 | 0.51  | 0.27  | -0.08 | 0.55  | 1.26  | -2.30 | 0.09  | 0.65  |
| P11021 | Endoplasmic reticulum chaperone BiP                                         | HSPA5    | 0.06 | 0.20 | -0.28 | 1.60  | 1.07  | -1.30 | -1.37 | -0.02 | -0.14 | 0.18  | -0.76 | 1.02  |
| P47914 | 60S ribosomal protein L29                                                   | RPL29    | 0.06 | 0.20 | 0.03  | -0.52 | 0.81  | -1.62 | 1.01  | -0.73 | 1.13  | -0.09 | -1.16 | 1.13  |
| Q99714 | 3-hydroxyacyl-CoA dehydrogenase type-2                                      | HSD17B10 | 0.06 | 0.13 | 0.13  | -0.61 | 1.65  | 0.02  | -1.37 | 1.33  | 0.84  | -1.04 | -0.46 | -0.49 |
| Q15020 | Squamous cell carcinoma antigen recognized by T-cells 3                     | SART3    | 0.06 | 0.07 | -1.73 | 0.63  | 0.71  | -0.04 | 0.32  | -1.71 | 1.43  | 0.14  | 0.13  | 0.11  |
| Q9GZQ8 | Microtubule-associated proteins 1A/1B light chain 3B                        | MAP1LC3B | 0.06 | 0.24 | 1.22  | -0.30 | -1.24 | 0.65  | -0.66 | -0.92 | 0.86  | -0.51 | 1.63  | -0.73 |
| Q9P0L2 | Serine/threonine-protein kinase MARK1                                       | MARK1    | 0.06 | 0.13 | -0.16 | -0.75 | 0.05  | 0.11  | 0.56  | 2.31  | -1.41 | 0.21  | -0.08 | -0.84 |
| Q9ULH1 | Arf-GAP with SH3 domain, ANK repeat and PH domain-containing                | ASAP1    | 0.06 | 0.04 | -0.44 | 1.02  | -1.42 | 0.54  | 0.24  | -0.65 | 1.54  | -1.53 | 0.28  | 0.44  |
| Q15907 | Ras-related protein Rab-11B                                                 | RAB11B   | 0.06 | 0.27 | -0.18 | -0.79 | -0.09 | 1.45  | -0.77 | -0.05 | 0.45  | -1.90 | 1.12  | 0.76  |
| O60884 | DnaJ homolog subfamily A member 2                                           | DNAJA2   | 0.06 | 0.14 | 0.85  | 0.74  | -1.30 | 0.79  | -1.29 | 0.68  | -0.92 | -1.08 | 0.53  | 1.00  |
| P06730 | Eukaryotic translation initiation factor 4E                                 | EIF4E    | 0.06 | 0.13 | -0.78 | 0.20  | -0.17 | 0.77  | -0.20 | -1.90 | -0.92 | 0.64  | 1.03  | 1.33  |
| Q8NBU5 | ATPase family AAA domain-containing protein 1                               | ATAD1    | 0.06 | 0.08 | -0.80 | 0.30  | -1.07 | 1.17  | 0.28  | 0.45  | -0.56 | -1.77 | 1.14  | 0.86  |
| Q9Y281 | Cofilin-2                                                                   | CFL2     | 0.06 | 0.17 | -0.59 | -0.37 | 1.16  | 0.85  | -1.29 | -0.19 | -1.36 | -0.51 | 1.21  | 1.09  |
| O43583 | Density-regulated protein                                                   | DENR     | 0.06 | 0.16 | 0.91  | -0.07 | 1.19  | -1.02 | -1.24 | -0.44 | 1.15  | 1.12  | -1.06 | -0.54 |
| Q96D16 | Mannose-1-phosphate guanylyltransferase alpha                               | GMPPA    | 0.05 | 0.21 | 1.12  | 0.24  | 0.22  | 0.26  | -2.13 | 0.65  | 0.19  | -1.39 | 0.04  | 0.80  |
| O14639 | Actin-binding LIM protein 1                                                 | ABLIM1   | 0.05 | 0.09 | -0.62 | 1.44  | -0.71 | 0.13  | -0.38 | 0.30  | -1.37 | -0.93 | 0.43  | 1.70  |
| Q13509 | Tubulin beta-3 chain                                                        | TUBB3    | 0.05 | 0.14 | 1.12  | -0.11 | 0.08  | 1.06  | -2.35 | 0.54  | -0.44 | 0.10  | 0.53  | -0.52 |
| Q9BQ70 | Transcription factor 25                                                     | TCF25    | 0.05 | 0.09 | -0.25 | 0.07  | -1.35 | 1.16  | 0.23  | 1.55  | -1.46 | -0.53 | 0.89  | -0.31 |
| Q92625 | Ankyrin repeat and SAM domain-containing protein 1A                         | ANKS1A   | 0.05 | 0.08 | 1.03  | -0.79 | -1.07 | -0.68 | 1.40  | 0.75  | -1.27 | 0.48  | 0.90  | 0.90  |
| Q8WVF1 | Protein OSCP1                                                               | OSCP1    | 0.05 | 0.06 | 1.67  | -0.42 | -0.55 | -0.38 | -0.41 | 2.07  | -0.36 | -0.86 | -0.45 | -0.31 |
| P20810 | Calpastatin                                                                 | CAST     | 0.05 | 0.10 | 1.42  | -0.82 | 0.95  | -1.01 | -0.70 | 1.02  | 0.97  | -1.09 | -0.84 | 0.09  |
| O95433 | Activator of 90 kDa heat shock protein ATPase homolog 1                     | AHSA1    | 0.05 | 0.10 | 1.12  | -0.18 | -0.49 | 0.24  | -0.83 | 1.05  | 1.01  | -2.12 | -0.07 | 0.27  |
| P62857 | 40S ribosomal protein S28                                                   | RPS28    | 0.05 | 0.19 | 1.14  | -0.16 | -0.36 | -1.49 | 0.60  | -1.07 | 0.39  | -0.09 | -0.73 | 1.77  |

|        |                                                                  |         |      |      |       |       |       |       |       |       |       |       |       |       |
|--------|------------------------------------------------------------------|---------|------|------|-------|-------|-------|-------|-------|-------|-------|-------|-------|-------|
| P36578 | 60S ribosomal protein L4                                         | RPL4    | 0.05 | 0.07 | -0.67 | -1.41 | -0.40 | -0.04 | 2.42  | -0.45 | 0.17  | 0.26  | -0.28 | 0.40  |
| Q03001 | Dystonin                                                         | DST     | 0.05 | 0.10 | -0.07 | -1.17 | 0.47  | 0.10  | 0.52  | -0.34 | -0.99 | 2.29  | 0.08  | -0.89 |
| Q72569 | BRCA1-associated protein                                         | BRAP    | 0.05 | 0.04 | 0.89  | 1.06  | -1.15 | -0.86 | 0.00  | 1.08  | -1.02 | -1.22 | 0.10  | 1.13  |
| P40603 | ATP-dependent DNA helicase Q1                                    | RECQL   | 0.05 | 0.04 | -0.39 | -1.18 | 0.43  | 0.66  | 0.42  | 0.25  | -2.16 | 1.27  | 0.17  | 0.53  |
| P32321 | Deoxycytidylate deaminase                                        | DCTD    | 0.05 | 0.06 | 0.80  | -0.67 | -0.89 | 1.39  | -0.71 | -0.77 | -0.83 | 1.25  | 1.15  | -0.72 |
| Q9H0R4 | Haloacid dehalogenase-like hydrolase domain-containing protein 2 | HDHD2   | 0.05 | 0.06 | -0.61 | -0.76 | 0.70  | 0.55  | 0.05  | -0.79 | -1.82 | 1.59  | 0.85  | 0.26  |
| P29692 | Elongation factor 1-delta                                        | EEF1D   | 0.05 | 0.04 | -1.35 | 0.18  | 0.87  | 0.76  | -0.52 | -1.17 | -1.31 | 1.24  | 0.86  | 0.43  |
| Q9Y697 | Cysteine desulfurase, mitochondrial                              | NFS1    | 0.05 | 0.05 | -1.22 | 0.27  | 0.78  | 0.21  | -0.11 | -1.90 | 0.90  | -0.79 | 0.92  | 0.94  |
| P28072 | Proteasome subunit beta type-6                                   | PSMB6   | 0.05 | 0.09 | -0.90 | -1.07 | 0.68  | -0.34 | 1.49  | -0.86 | -0.41 | 1.78  | 0.03  | -0.40 |
| Q7KZ85 | Transcription elongation factor SPT6                             | SUPT6H  | 0.05 | 0.03 | -1.57 | 1.19  | 0.15  | 0.53  | -0.35 | -1.62 | -0.42 | 0.49  | 0.37  | 1.22  |
| Q9NZM3 | Intersectin-2                                                    | ITSN2   | 0.05 | 0.07 | 1.30  | -0.95 | -0.34 | -0.21 | 0.10  | 1.66  | 0.88  | -1.50 | -0.42 | -0.52 |
| Q05707 | Collagen alpha-1(XIV) chain                                      | COL14A1 | 0.05 | 0.02 | -1.23 | 0.49  | 1.15  | -0.37 | -0.07 | -1.26 | 1.74  | -0.13 | -0.91 | 0.58  |
| Q15628 | Tumor necrosis factor receptor type 1-associated DEATH domain    | TRADD   | 0.04 | 0.05 | -0.54 | 0.49  | 1.33  | -0.67 | -0.69 | -0.65 | -0.78 | -1.09 | 1.01  | 1.59  |
| Q9ULP0 | Protein NDRG4                                                    | NDRG4   | 0.04 | 0.07 | 0.59  | 1.22  | 0.45  | -0.19 | -2.16 | -0.27 | -0.39 | 1.27  | 0.12  | -0.63 |
| Q8NDY3 | [Protein ADP-ribosylarginine] hydrolase-like protein 1           | ADPRHL1 | 0.04 | 0.07 | 1.56  | -0.34 | -0.66 | -0.36 | -0.31 | 2.13  | -0.43 | -0.88 | -0.28 | -0.44 |
| P14854 | Cytochrome c oxidase subunit 6B1                                 | COX6B1  | 0.04 | 0.08 | -0.20 | 1.48  | -1.34 | -0.26 | 0.21  | -0.92 | -1.23 | 0.68  | 0.17  | 1.41  |
| O76024 | Wolframin                                                        | WFS1    | 0.04 | 0.04 | 0.19  | 0.87  | 0.10  | 0.21  | -1.42 | -0.26 | -1.35 | -0.93 | 1.24  | 1.36  |
| Q04609 | Glutamate carboxypeptidase 2                                     | FOLH1   | 0.04 | 0.07 | -0.40 | -0.91 | 2.00  | -0.67 | -0.12 | -0.90 | -0.80 | 1.38  | 0.43  | 0.00  |
| Q13163 | Dual specificity mitogen-activated protein kinase kinase 5       | MAP2K5  | 0.04 | 0.10 | -0.35 | 1.63  | -1.22 | 0.20  | -0.40 | -1.43 | -0.47 | 1.18  | -0.07 | 0.94  |
| P49750 | YLP motif-containing protein 1                                   | YLPM1   | 0.04 | 0.03 | 0.72  | 0.44  | -1.19 | 1.02  | -1.05 | 0.97  | -1.04 | -1.29 | 0.88  | 0.53  |
| Q13347 | Eukaryotic translation initiation factor 3 subunit I             | EIF3I   | 0.04 | 0.09 | 0.32  | -0.42 | 0.50  | 0.07  | -0.60 | 0.45  | 1.51  | -2.32 | 0.03  | 0.46  |
| O75312 | Zinc finger protein ZPR1                                         | ZPR1    | 0.04 | 0.06 | 0.73  | 0.55  | -0.85 | -0.81 | 0.29  | 1.57  | -0.64 | -1.26 | -0.83 | 1.25  |
| O60890 | Oligophrenin-1                                                   | OPHN1   | 0.04 | 0.05 | 1.82  | -0.68 | -1.02 | -0.74 | 0.54  | 1.29  | 0.65  | -0.61 | -0.42 | -0.84 |
| O00534 | von Willebrand factor A domain-containing protein 5A             | VWASA   | 0.04 | 0.07 | -0.42 | -0.44 | -0.17 | -1.26 | 2.18  | 0.28  | 1.21  | -0.40 | -0.33 | -0.66 |
| P55072 | Transitional endoplasmic reticulum ATPase                        | VCP     | 0.04 | 0.02 | 1.12  | 0.10  | 0.59  | -1.70 | -0.15 | 0.26  | 0.83  | 1.12  | -0.88 | -1.31 |
| O00233 | 26S proteasome non-ATPase regulatory subunit 9                   | PSMD9   | 0.04 | 0.04 | -0.60 | 0.77  | -0.93 | -0.63 | 1.33  | -0.76 | -0.80 | 1.49  | -0.82 | 0.95  |
| P20073 | Annexin A7                                                       | ANXA7   | 0.04 | 0.12 | -0.38 | 1.73  | -0.37 | -0.77 | -0.38 | 0.22  | 0.16  | 1.72  | -1.21 | -0.71 |
| Q96DT6 | Cysteine protease ATG4C                                          | ATG4C   | 0.04 | 0.03 | 0.64  | 0.69  | -1.22 | 0.86  | -1.02 | 1.02  | -1.01 | -1.35 | 0.65  | 0.73  |
| Q08462 | Adenylate cyclase type 2                                         | ADCY2   | 0.04 | 0.04 | -0.08 | -1.39 | 2.50  | -0.68 | -0.42 | -0.17 | -0.08 | 0.24  | 0.22  | -0.15 |
| P46087 | Probable 28S rRNA (cytosine(4447)-C(5))-methyltransferase        | NOP2    | 0.04 | 0.05 | -1.23 | 0.55  | 0.11  | 0.02  | 0.48  | -0.90 | 1.42  | -1.76 | 0.39  | 0.92  |
| P50579 | Methionine aminopeptidase 2                                      | METAP2  | 0.04 | 0.05 | -0.67 | -0.61 | 0.95  | -0.07 | 0.32  | -1.50 | -0.87 | 2.01  | 0.25  | 0.19  |
| Q8NE71 | ATP-binding cassette sub-family F member 1                       | ABCF1   | 0.04 | 0.04 | -0.62 | -0.52 | 0.50  | 0.08  | 0.50  | -1.05 | -1.78 | 1.68  | 0.59  | 0.63  |
| P78344 | Eukaryotic translation initiation factor 4 gamma 2               | EIF4G2  | 0.04 | 0.06 | 0.85  | 0.44  | -0.65 | 0.37  | -1.10 | 0.88  | -0.14 | -2.06 | 0.35  | 1.07  |
| Q96KN4 | Protein LRATD1                                                   | LRATD1  | 0.04 | 0.03 | 1.26  | -0.67 | -0.26 | -0.82 | 0.44  | 1.33  | -1.41 | 1.11  | 0.03  | -1.01 |
| Q6U841 | Sodium-driven chloride bicarbonate exchanger                     | SLC4A10 | 0.04 | 0.05 | -0.94 | 0.62  | -0.76 | 1.01  | 0.01  | -1.14 | 0.01  | -1.30 | 1.32  | 1.18  |
| Q8WY54 | Protein phosphatase 1E                                           | PPM1E   | 0.04 | 0.13 | -1.16 | 0.85  | -0.12 | 0.62  | -0.39 | -1.73 | 1.63  | 0.11  | 0.69  | -0.51 |
| P50552 | Vasodilator-stimulated phosphoprotein                            | VASP    | 0.04 | 0.04 | -1.02 | 0.47  | 1.15  | 0.37  | -1.03 | 0.57  | -2.00 | 0.67  | 0.18  | 0.65  |
| O95168 | NADH dehydrogenase [ubiquinone] 1 beta subcomplex subunit 4      | NDUFB4  | 0.04 | 0.06 | -0.15 | -0.38 | -0.64 | -0.43 | 1.52  | -0.40 | -0.25 | -1.05 | -0.32 | 2.12  |
| O15231 | Zinc finger protein 185                                          | ZNF185  | 0.04 | 0.04 | -0.29 | 1.67  | -0.55 | -0.41 | -0.48 | -0.36 | -0.37 | -0.78 | -0.49 | 2.08  |
| A2RRP1 | Neuroblastoma-amplified sequence                                 | NBAS    | 0.04 | 0.10 | 0.82  | -0.91 | -0.81 | 1.24  | -0.48 | 0.12  | 0.25  | -1.83 | 1.22  | 0.40  |
| Q15147 | 1-phosphatidylinositol 4,5-bisphosphate phosphodiesterase beta-4 | PLCB4   | 0.03 | 0.04 | 1.26  | -1.94 | 0.57  | -0.55 | 0.61  | 0.84  | 0.45  | -1.24 | 0.32  | -0.31 |
| P55290 | Cadherin-13                                                      | CDH13   | 0.03 | 0.03 | -2.06 | 0.46  | 0.12  | 0.69  | 0.74  | -1.00 | -0.97 | 0.33  | 0.74  | 0.94  |
| P15927 | Replication protein A 32 kDa subunit                             | RPA2    | 0.03 | 0.10 | 1.02  | 0.05  | -0.18 | -0.24 | -0.79 | 0.41  | -0.58 | -1.99 | 0.91  | 1.39  |
| Q13561 | Dynactin subunit 2                                               | DCTN2   | 0.03 | 0.09 | 0.57  | 1.36  | -1.12 | -0.96 | 0.03  | -0.06 | 1.64  | -1.14 | -0.71 | 0.41  |
| Q13769 | THO complex subunit 5 homolog                                    | THOC5   | 0.03 | 0.06 | -0.43 | -0.59 | -0.80 | -0.45 | 2.18  | -0.48 | -0.77 | 0.89  | 0.99  | -0.55 |
| Q8NHU6 | Tudor domain-containing protein 7                                | TDRD7   | 0.03 | 0.05 | -0.57 | 0.85  | -1.17 | 1.83  | -1.01 | -0.71 | -0.88 | 0.62  | 0.58  | 0.45  |
| Q9UPW5 | Cytosolic carboxypeptidase 1                                     | AGTPBP1 | 0.03 | 0.08 | -0.62 | -0.07 | 0.16  | 0.24  | 0.18  | -1.35 | 2.51  | -0.30 | -0.37 | -0.37 |
| Q9BR01 | Sulfotransferase 4A1                                             | SULT4A1 | 0.03 | 0.06 | -0.75 | -0.70 | -0.55 | 0.66  | 1.25  | 0.39  | -0.57 | 1.06  | 0.96  | -1.76 |
| Q9NUQ9 | Protein FAM49B                                                   | FAM49B  | 0.03 | 0.06 | 0.64  | 0.17  | 0.13  | -0.48 | -0.54 | -1.30 | -0.45 | 2.25  | -0.32 | -0.99 |
| Q9Y4C0 | Neurexin-3                                                       | NRXN3   | 0.03 | 0.04 | -1.02 | 1.08  | 1.22  | -0.40 | -0.94 | -1.83 | 0.47  | 0.30  | 0.60  | 0.52  |
| Q9UB19 | Headcase protein homolog                                         | HECA    | 0.03 | 0.03 | 0.05  | -1.96 | 0.18  | 0.84  | 0.85  | -1.30 | 0.19  | 0.83  | 0.94  | -0.62 |
| P52757 | Beta-chimaerin                                                   | CHN2    | 0.03 | 0.03 | -0.24 | 0.59  | -1.67 | 0.63  | 0.65  | -1.43 | -0.23 | 1.59  | -0.37 | 0.49  |
| Q9NZB2 | Constitutive coactivator of PPAR-gamma-like protein 1            | FAM120A | 0.03 | 0.03 | -0.09 | -0.40 | 1.79  | -0.07 | -0.46 | -0.61 | 1.91  | -0.17 | -0.45 | -0.62 |
| Q9NWW6 | Nicotinamide riboside kinase 1                                   | NMRK1   | 0.03 | 0.03 | 1.73  | -0.46 | -0.58 | -0.29 | -0.44 | 2.03  | -0.42 | -0.74 | -0.45 | -0.37 |
| Q13153 | Serine/threonine-protein kinase PAK 1                            | PAK1    | 0.03 | 0.08 | -0.29 | 1.21  | -0.78 | -0.79 | 0.55  | -1.36 | 1.44  | 1.14  | -0.40 | -0.71 |
| Q9Y5Z4 | Heme-binding protein 2                                           | HEBP2   | 0.03 | 0.03 | -1.18 | 0.87  | -0.51 | 0.53  | 0.25  | 0.54  | -2.20 | 0.51  | 0.33  | 0.86  |
| Q9H2X9 | Solute carrier family 12 member 5                                | SLC12A5 | 0.03 | 0.04 | 1.05  | -1.86 | -0.08 | 0.74  | 0.09  | -0.05 | 1.36  | -1.21 | 0.52  | -0.55 |
| P11532 | Dystrophin                                                       | DMD     | 0.03 | 0.05 | -1.05 | 1.47  | -0.17 | 0.32  | -0.64 | -0.50 | -1.06 | -0.68 | 0.57  | 1.74  |
| Q9Y2H9 | Microtubule-associated serine/threonine-protein kinase 1         | MAST1   | 0.03 | 0.06 | -0.09 | 0.42  | -2.32 | 1.02  | 0.88  | -0.33 | -0.80 | 0.06  | 0.86  | 0.31  |
| P56192 | Methionine-tRNA ligase, cytoplasmic                              | MARS    | 0.03 | 0.13 | -0.29 | 0.81  | -1.14 | 0.66  | -0.23 | -1.25 | -0.58 | -0.50 | 0.50  | 2.02  |
| P42766 | 60S ribosomal protein L35                                        | RPL35   | 0.03 | 0.04 | -0.55 | -1.53 | 0.77  | -0.41 | 1.66  | -1.02 | 0.69  | 0.32  | -0.75 | 0.82  |
| O75157 | TSC22 domain family protein 2                                    | TSC22D2 | 0.03 | 0.02 | 0.20  | 0.76  | -2.37 | 0.90  | 0.47  | 0.33  | 0.09  | -1.09 | 0.68  | 0.03  |
| O00148 | ATP-dependent RNA helicase DDX39A                                | DDX39A  | 0.03 | 0.02 | 1.16  | -1.71 | 1.55  | -0.08 | -0.97 | 0.26  | -1.04 | 0.26  | 0.30  | 0.27  |
| Q8WKE9 | Stonin-2                                                         | STON2   | 0.03 | 0.02 | 0.86  | -0.58 | -0.94 | 0.59  | 0.05  | 0.59  | 0.84  | -2.26 | 0.74  | 0.11  |
| O00232 | 26S proteasome non-ATPase regulatory subunit 12                  | PSMD12  | 0.02 | 0.07 | 0.09  | 1.50  | -1.21 | -0.42 | -0.06 | 0.37  | 0.27  | -1.96 | 0.79  | 0.65  |
| Q8WWI5 | Choline transporter-like protein 1                               | SLC44A1 | 0.02 | 0.03 | 0.12  | -1.12 | 0.94  | 0.37  | -0.37 | -1.61 | 0.46  | 1.69  | 0.38  | -0.88 |
| Q8N8A6 | ATP-dependent RNA helicase DDX51                                 | DDX51   | 0.02 | 0.03 | 0.56  | -1.26 | 0.23  | 0.02  | 0.40  | -1.13 | 0.88  | -1.60 | 0.45  | 1.44  |
| Q15785 | Mitochondrial import receptor subunit TOM34                      | TOMM34  | 0.02 | 0.03 | 0.95  | -0.10 | -0.56 | 0.48  | -0.81 | 0.40  | 0.70  | -2.31 | 0.40  | 0.85  |
| P62316 | Small nuclear ribonucleoprotein Sm D2                            | SNRPD2  | 0.02 | 0.04 | 1.99  | -1.25 | 0.28  | -0.52 | -0.56 | 1.17  | -1.13 | -0.01 | -0.30 | 0.32  |
| Q6PJ19 | GATOR complex protein WDR59                                      | WDR59   | 0.02 | 0.02 | -1.13 | -0.14 | 0.80  | 0.62  | -0.18 | -1.31 | -1.33 | 0.26  | 0.91  | 1.51  |
| Q9BQS8 | FYVE and coiled-coil domain-containing protein 1                 | FYCO1   | 0.02 | 0.02 | 1.27  | 0.05  | -1.01 | -0.03 | -0.30 | 0.89  | 1.59  | -1.61 | -0.37 | -0.46 |
| Q13367 | AP-3 complex subunit beta-2                                      | AP3B2   | 0.02 | 0.08 | -0.24 | -0.55 | -1.18 | 0.41  | 1.44  | -0.55 | -0.32 | 1.65  | 0.58  | -1.24 |
| P14920 | D-amino-acid oxidase                                             | DAO     | 0.02 | 0.03 | -0.88 | 0.04  | 1.38  | 0.66  | -1.25 | -1.06 | 0.86  | 0.33  | 1.04  | -1.13 |
| Q9P0U4 | CXXC-type zinc finger protein 1                                  | CXXC1   | 0.02 | 0.02 | 1.46  | -0.67 | -0.74 | 0.56  | -0.65 | -0.66 | 1.77  | -0.97 | 0.49  | -0.61 |
| Q9UP29 | Serine/threonine-protein kinase ICK                              | ICK     | 0.02 | 0.03 | -0.38 | -0.51 | 1.94  | -0.49 | -0.60 | -0.38 | -0.42 | 1.84  | -0.57 | -0.44 |
| Q9BXP5 | Serrate RNA effector molecule homolog                            | SRRT    | 0.02 | 0.03 | 0.93  | 0.35  | -1.28 | 0.00  | -0.05 | 0.86  | 0.93  | -2.17 | 0.22  | 0.21  |
| O00213 | Amyloid-beta A4 precursor protein-binding family B member 1      | APBB1   | 0.02 | 0.04 | -0.05 | 0.97  | -1.08 | 0.53  | -0.44 | 0.85  | -0.28 | -2.03 | 0.36  | 1.17  |
| P42224 | Signal transducer and activator of transcription 1-alpha/beta    | STAT1   | 0.02 | 0.03 | 1.31  | 0.27  | -1.96 | 0.43  | -0.09 | 0.11  | 0.52  | -1.55 | 0.56  | 0.40  |
| Q9Y3E7 | Charged multivesicular body protein 3                            | CHMP3   | 0.02 | 0.03 | -1.54 | -0.23 | 1.02  | 0.64  | 0.08  | -1.03 | -1.38 | 0.54  | 1.08  | 0.84  |
| Q15075 | Early endosome antigen 1                                         | EEA1    | 0.02 | 0.05 | 0.97  | 0.48  | 0.19  | -2.22 | 0.51  | -0.11 | 1.15  | 0.45  | -0.89 | -0.54 |
| P22830 | Ferrochelatase, mitochondrial                                    | FECH    | 0.02 | 0.03 | -1.51 | 0.46  | 0.76  | 0.88  | -0.65 | -1.29 | -0.78 | 0.12  | 0.53  | 1.46  |
| Q13416 | Origin recognition complex subunit 2                             | ORC2    | 0.02 | 0.02 | 1.24  | -0.66 | -0.79 | 0.86  | -0.68 | -0.61 | -0.65 | 2.01  | -0.60 | -0.12 |
| Q7LG56 | Ribonucleoside-diphosphate reductase subunit M2 B                | RRM2B   | 0.02 | 0.03 | -0.40 | 0.08  | -0.70 | 0.72  | 0.25  | 0.20  | -1.71 | -1.08 | 1.05  | 1.59  |

|        |                                                                              |          |       |      |
|--------|------------------------------------------------------------------------------|----------|-------|------|
| Q726J4 | FYVE, RhoGEF and PH domain-containing protein 2                              | FGD2     | 0.02  | 0.03 |
| Q13033 | Striatin-3                                                                   | STRN3    | 0.02  | 0.01 |
| O15031 | Plexin-B2                                                                    | PLXNB2   | 0.02  | 0.01 |
| P05067 | Amyloid-beta precursor protein                                               | APP      | 0.02  | 0.01 |
| Q13057 | Bifunctional coenzyme A synthase                                             | COASY    | 0.02  | 0.03 |
| O14936 | Peripheral plasma membrane protein CASK                                      | CASK     | 0.02  | 0.03 |
| Q9H9T3 | Blongator complex protein 3                                                  | ELP3     | 0.02  | 0.02 |
| Q8N5S9 | Calcium/calmodulin-dependent protein kinase kinase 1                         | CAMKK1   | 0.02  | 0.03 |
| P61978 | Heterogeneous nuclear ribonucleoprotein K                                    | HNRNPK   | 0.02  | 0.06 |
| S54652 | Heat shock-related 70 kDa protein 2                                          | HSPA2    | 0.02  | 0.07 |
| Q86VM9 | Zinc finger CCCH domain-containing protein 18                                | ZC3H18   | 0.02  | 0.03 |
| P33176 | Kinesin-1 heavy chain                                                        | KIF5B    | 0.01  | 0.06 |
| P63173 | 60S ribosomal protein L38                                                    | RPL38    | 0.01  | 0.02 |
| P46781 | 40S ribosomal protein S9                                                     | RPS9     | 0.01  | 0.04 |
| Q8NCA5 | Protein FAM98A                                                               | FAM98A   | 0.01  | 0.01 |
| P10155 | 60 kDa SS-A/Ro ribonucleoprotein                                             | RO60     | 0.01  | 0.01 |
| Q8TCE6 | DENN domain-containing protein 10                                            | DENND10  | 0.01  | 0.02 |
| P53999 | Activated RNA polymerase II transcriptional coactivator p15                  | SUB1     | 0.01  | 0.01 |
| S54725 | UV excision repair protein RAD23 homolog A                                   | RAD23A   | 0.01  | 0.01 |
| Q724V5 | Hepatoma-derived growth factor-related protein 2                             | HDGFL2   | 0.01  | 0.02 |
| Q1L5Z9 | LON peptidase N-terminal domain and RING finger protein 2                    | LONRF2   | 0.01  | 0.01 |
| O60927 | E3 ubiquitin-protein ligase PPP1R11                                          | PPP1R11  | 0.01  | 0.01 |
| Q96EM0 | Trans-3-hydroxy-L-proline dehydratase                                        | L3HYPDH  | 0.01  | 0.01 |
| Q9UNF1 | Melanoma-associated antigen D2                                               | MAGED2   | 0.01  | 0.01 |
| Q01484 | Ankyrin-2                                                                    | ANK2     | 0.01  | 0.01 |
| Q8N584 | Tetratricopeptide repeat protein 39C                                         | TTC39C   | 0.01  | 0.01 |
| P40692 | DNA mismatch repair protein Mlh1                                             | MLH1     | 0.01  | 0.00 |
| P24298 | Alanine aminotransferase 1                                                   | GPT      | 0.01  | 0.01 |
| P78357 | Contactin-associated protein 1                                               | CNTNAP1  | 0.01  | 0.01 |
| O75489 | NADH dehydrogenase [ubiquinone] iron-sulfur protein 3, mitochondrion         | NDUFS3   | 0.01  | 0.01 |
| Q9P2X3 | Protein IMPACT                                                               | IMPACT   | 0.01  | 0.01 |
| Q13564 | NEDD8-activating enzyme E1 regulatory subunit                                | NAE1     | 0.01  | 0.02 |
| Q9H0A0 | RNA cytidine acetyltransferase                                               | NAT10    | 0.00  | 0.00 |
| Q61CG6 | Uncharacterized protein KIAA0930                                             | KIAA0930 | 0.00  | 0.00 |
| Q92930 | Ras-related protein Rab-8B                                                   | RAB8B    | 0.00  | 0.02 |
| Q92797 | Symplekin                                                                    | SYMPK    | 0.00  | 0.01 |
| Q8WW11 | LIM domain only protein 7                                                    | LMO7     | 0.00  | 0.00 |
| P21283 | V-type proton ATPase subunit C 1                                             | ATP6V1C1 | 0.00  | 0.01 |
| Q14974 | Importin subunit beta-1                                                      | KPNB1    | 0.00  | 0.00 |
| Q9BVM2 | Protein DPCD                                                                 | DPCD     | 0.00  | 0.00 |
| Q96BF6 | Nucleus accumbens-associated protein 2                                       | NACC2    | 0.00  | 0.00 |
| Q9NQ66 | 1-phosphatidylinositol 4,5-bisphosphate phosphodiesterase beta-1             | PLCB1    | 0.00  | 0.00 |
| Q96BY7 | Autophagy-related protein 2 homolog B                                        | ATG2B    | 0.00  | 0.00 |
| Q07889 | Son of sevenless homolog 1                                                   | SOS1     | 0.00  | 0.00 |
| Q9BPW8 | Protein NipSnap homolog 1                                                    | NIPSNAP1 | 0.00  | 0.00 |
| O00499 | Myc box-dependent-interacting protein 1                                      | BIN1     | 0.00  | 0.00 |
| Q68UL8 | Membrane-associated guanylate kinase, WW and PDZ domain-containing protein 1 | MAGI2    | 0.00  | 0.00 |
| P31689 | DnaJ homolog subfamily A member 1                                            | DNAJA1   | 0.00  | 0.00 |
| Q8NFW8 | N-acylneuraminate cytidylyltransferase                                       | CMAS     | 0.00  | 0.00 |
| Q9NR22 | Protein arginine N-methyltransferase 8                                       | PRMT8    | 0.00  | 0.00 |
| P08708 | 40S ribosomal protein S17                                                    | RPS17    | 0.00  | 0.00 |
| O14972 | Vacuolar protein sorting-associated protein 26C                              | VPS26C   | 0.00  | 0.00 |
| Q9BT73 | Proteasome assembly chaperone 3                                              | PSMG3    | 0.00  | 0.01 |
| O60282 | Kinesin heavy chain isoform 5C                                               | KIF5C    | 0.00  | 0.01 |
| Q6PCE3 | Glucose 1,6-bisphosphate synthase                                            | PGM2L1   | 0.00  | 0.01 |
| P30740 | Leukocyte elastase inhibitor                                                 | SERPINF1 | 0.00  | 0.01 |
| Q9BT78 | COP9 signalosome complex subunit 4                                           | COPS4    | 0.00  | 0.01 |
| P02042 | Hemoglobin subunit delta                                                     | HBD      | -0.01 | 0.01 |
| O95503 | Chromobox protein homolog 6                                                  | CBX6     | -0.01 | 0.01 |
| P36894 | Bone morphogenetic protein receptor type-1A                                  | BMRI1A   | -0.01 | 0.01 |
| P51693 | Amyloid-like protein 1                                                       | APLP1    | -0.01 | 0.01 |
| Q676U5 | Autophagy-related protein 16-1                                               | ATG16L1  | -0.01 | 0.01 |
| P17096 | High mobility group protein HMG-1/HMG-Y                                      | HMG1     | -0.01 | 0.01 |
| Q9HBD1 | Roquin-2                                                                     | RC3H2    | -0.01 | 0.01 |
| P17301 | Integrin alpha-2                                                             | ITGA2    | -0.01 | 0.06 |
| Q8NF50 | Dedicator of cytokinesis protein 8                                           | DOCK8    | -0.01 | 0.01 |
| Q13283 | Ras GTPase-activating protein-binding protein 1                              | G3BP1    | -0.01 | 0.01 |
| P49585 | Choline-phosphate cytidylyltransferase A                                     | PCYT1A   | -0.01 | 0.01 |
| Q15366 | Poly(rC)-binding protein 2                                                   | PCBP2    | -0.01 | 0.01 |
| Q72401 | C-myc promoter-binding protein                                               | DENND4A  | -0.01 | 0.01 |
| P52294 | Importin subunit alpha-5                                                     | KPNA1    | -0.01 | 0.01 |
| O00305 | Voltage-dependent L-type calcium channel subunit beta-4                      | CACNB4   | -0.01 | 0.01 |
| Q96MC5 | bMERB domain-containing protein 1                                            | BMERB1   | -0.01 | 0.01 |
| Q70253 | Protein FRA10AC1                                                             | FRA10AC1 | -0.01 | 0.08 |
| Q8N302 | Angiogenic factor with G patch and FHA domains 1                             | AGGF1    | -0.01 | 0.09 |
| Q92841 | Probable ATP-dependent RNA helicase DDX17                                    | DDX17    | -0.01 | 0.03 |
| Q9NQE9 | Histidine triad nucleotide-binding protein 3                                 | HINT3    | -0.01 | 0.01 |
| Q9H8H3 | Methyltransferase-like protein 7A                                            | METTL7A  | -0.01 | 0.02 |
| O15511 | Actin-related protein 2/3 complex subunit 5                                  | ARPC5    | -0.01 | 0.02 |
| Q13098 | COP9 signalosome complex subunit 1                                           | GPS1     | -0.02 | 0.03 |
| Q03468 | DNA excision repair protein ERCC-6                                           | ERCC6    | -0.02 | 0.12 |
| P18621 | 60S ribosomal protein L17                                                    | RPL17    | -0.02 | 0.02 |
| A4DLU4 | DENN domain-containing protein 11                                            | DENND11  | -0.02 | 0.02 |

|       |       |       |       |       |       |       |       |       |       |
|-------|-------|-------|-------|-------|-------|-------|-------|-------|-------|
| -0.43 | -0.93 | -1.05 | 0.84  | 1.54  | -0.80 | -0.75 | 1.52  | 0.38  | -0.32 |
| 0.95  | 0.15  | -1.62 | -0.16 | 0.66  | 1.21  | 0.74  | -1.72 | -0.12 | -0.09 |
| 0.49  | 1.03  | -1.22 | 0.29  | -0.62 | 1.46  | -1.06 | -1.39 | 0.64  | 0.37  |
| -0.17 | -0.37 | -0.71 | -1.02 | 2.25  | -0.91 | 0.87  | 0.60  | 0.00  | -0.52 |
| 0.91  | -0.22 | -0.77 | 0.43  | -0.40 | 1.42  | -0.05 | -2.17 | 0.17  | 0.67  |
| -2.18 | 1.37  | 0.30  | 0.76  | -0.28 | -0.12 | -0.73 | -0.31 | 0.97  | 0.23  |
| -0.53 | 1.06  | -0.91 | 1.09  | -0.74 | -0.62 | -0.75 | -1.05 | 1.25  | 1.19  |
| 0.43  | -2.03 | 1.25  | 0.32  | -0.02 | -0.66 | -0.79 | 0.99  | 0.91  | -0.40 |
| 2.06  | -0.12 | -1.51 | -0.26 | -0.24 | -0.08 | -0.38 | -0.91 | 0.33  | 1.12  |
| -0.99 | 0.18  | 0.01  | 0.66  | 0.04  | -0.95 | -1.79 | 0.23  | 1.27  | 1.33  |
| 0.47  | -1.29 | -1.50 | 0.48  | 1.78  | -0.32 | -0.78 | 0.27  | 0.04  | 0.82  |
| 1.88  | -0.53 | 0.46  | -0.62 | -1.28 | 1.33  | -0.24 | 0.35  | -0.89 | -0.47 |
| -0.17 | -2.05 | 0.09  | 0.82  | 1.28  | 0.30  | -0.87 | -0.74 | 0.38  | 0.97  |
| -0.02 | -1.97 | 1.65  | 0.28  | 0.01  | -0.97 | 0.68  | -0.66 | 0.50  | 0.51  |
| 1.52  | -0.74 | -1.04 | -0.72 | 0.96  | 1.11  | -0.75 | -1.10 | -0.03 | 0.80  |
| -1.46 | 0.32  | 0.65  | 0.24  | 0.23  | -0.89 | -1.59 | 1.57  | 0.58  | 0.35  |
| -1.04 | 0.74  | -0.72 | 1.46  | -0.46 | -0.65 | -0.79 | -0.81 | 1.46  | 0.82  |
| -0.64 | -0.64 | 0.27  | 0.67  | 0.32  | -1.61 | -0.87 | 2.01  | 0.42  | 0.07  |
| -0.69 | -0.80 | -0.85 | 1.40  | 0.93  | -0.72 | -0.81 | 1.19  | 1.10  | -0.74 |
| 1.73  | 0.10  | 0.19  | -0.21 | -1.84 | -0.52 | 1.09  | -0.24 | -0.85 | 0.55  |
| 1.95  | -0.13 | -0.46 | 0.08  | -1.45 | 0.77  | 0.58  | 0.02  | 0.01  | -1.38 |
| -0.15 | 0.12  | 1.60  | -1.49 | -0.09 | -0.33 | -0.08 | 0.75  | -1.48 | 1.15  |
| 0.54  | -0.90 | -1.00 | 0.99  | 0.36  | -0.86 | -0.88 | 1.45  | 1.18  | -0.88 |
| -0.80 | 1.11  | 0.05  | 1.13  | -1.50 | -0.25 | -0.30 | -1.30 | 0.93  | 0.93  |
| -1.35 | 0.77  | 0.22  | 0.47  | -0.12 | -1.02 | -1.63 | 1.15  | 0.55  | 0.97  |
| 0.65  | 0.15  | 0.46  | -0.10 | -1.18 | 0.68  | 1.22  | 0.26  | 0.08  | -2.22 |
| 1.21  | -1.36 | -0.50 | 0.41  | 0.24  | 0.98  | 1.16  | -1.53 | 0.14  | -0.75 |
| 1.77  | -1.97 | -0.58 | 0.49  | 0.27  | -0.58 | 0.79  | -0.38 | 0.42  | -0.24 |
| 0.80  | 0.57  | 0.24  | 0.29  | -1.92 | -1.58 | -0.44 | 0.41  | 0.76  | 0.88  |
| 1.08  | -1.22 | 1.46  | -1.20 | -0.12 | 0.47  | -1.30 | -0.33 | 0.40  | 0.77  |
| 0.27  | -1.44 | 0.48  | 1.01  | -0.34 | 0.72  | 0.96  | -1.99 | 0.21  | 0.12  |
| 1.01  | -0.56 | 0.41  | 1.15  | -2.03 | 1.03  | -0.94 | 0.11  | 0.09  | -0.27 |
| -1.30 | 0.43  | 0.19  | 0.01  | 0.67  | -1.33 | -1.39 | 1.17  | 0.33  | 1.21  |
| -0.58 | -0.76 | -0.81 | 0.97  | 1.18  | -0.69 | -0.66 | -1.08 | 1.36  | 1.08  |
| 0.34  | 0.01  | 0.62  | -0.28 | -0.72 | 1.51  | 1.25  | -1.67 | 0.08  | -1.12 |
| 1.51  | -0.68 | -0.87 | 0.74  | -0.70 | 0.58  | -0.66 | -1.25 | -0.13 | 1.45  |
| 1.68  | -0.07 | -0.76 | -0.05 | -0.81 | 0.54  | 0.78  | -1.96 | 0.36  | 0.29  |
| 0.21  | 1.62  | -0.43 | 0.21  | -1.62 | -1.26 | -0.68 | 0.62  | 0.37  | 0.95  |
| -1.47 | 1.49  | 0.41  | 0.27  | -0.72 | 0.87  | -0.63 | -1.38 | 0.30  | 0.84  |
| 0.68  | 0.32  | -1.78 | 0.56  | 0.21  | 0.45  | 0.07  | -1.92 | 0.61  | 0.79  |
| -0.32 | -0.49 | -0.61 | -0.49 | 1.91  | -0.46 | -0.50 | 1.87  | -0.44 | -0.46 |
| -0.93 | 0.37  | 0.43  | 0.89  | -0.76 | -1.93 | -0.58 | 0.79  | 1.25  | 0.47  |
| 0.77  | 0.42  | 0.65  | -0.61 | -1.23 | -0.46 | -0.07 | -1.15 | -0.39 | 2.06  |
| 0.39  | 0.66  | -2.31 | 0.79  | 0.46  | 0.21  | -0.03 | -1.17 | 0.91  | 0.08  |
| 0.50  | -0.73 | 1.64  | 0.17  | -1.58 | -1.41 | 0.41  | -0.01 | 0.11  | 0.91  |
| 0.38  | 0.25  | -0.33 | 0.02  | -0.32 | -1.91 | 0.81  | 1.63  | 0.58  | -1.12 |
| 0.41  | 1.00  | -1.70 | 0.10  | 0.19  | -0.01 | 1.19  | -1.76 | 0.62  | -0.04 |
| -0.91 | 0.32  | 1.56  | 0.75  | -1.71 | -1.26 | 0.08  | 0.14  | 0.48  | 0.55  |
| 1.57  | -2.21 | -0.20 | 0.76  | 0.09  | -0.33 | -0.21 | 0.63  | 0.43  | -0.53 |
| 0.29  | 0.29  | -1.62 | 0.83  | 0.22  | -0.47 | 0.07  | -1.72 | 0.89  | 1.22  |
| 0.88  | -0.45 | -0.52 | -0.28 | 0.37  | 1.21  | 1.70  | -0.58 | -1.42 | -0.92 |
| 1.59  | -0.30 | -1.38 | 0.15  | -0.05 | 1.60  | -1.22 | -0.51 | -0.18 | 0.31  |
| 0.09  | -0.43 | -0.75 | 1.36  | -0.25 | -0.16 | -0.42 | -1.13 | -0.46 | 2.16  |
| 0.05  | 1.93  | -0.54 | -0.08 | -1.34 | 0.59  | 0.99  | -1.30 | -0.39 | 0.09  |
| 1.48  | -0.90 | -0.37 | -0.22 | 0.02  | 1.62  | 0.15  | -0.10 | 0.11  | -1.78 |
| -1.27 | 0.37  | 0.28  | -0.16 | 0.79  | -1.10 | -1.49 | 1.47  | 0.16  | 0.96  |
| 0.42  | 0.84  | -2.46 | 0.43  | 0.78  | 0.00  | 0.45  | 0.37  | -0.95 | 0.12  |
| -0.15 | -0.29 | 0.01  | 0.39  | 0.05  | -1.93 | -1.04 | 1.77  | 0.80  | 0.39  |
| 1.27  | -0.70 | -0.77 | -0.64 | 0.84  | 0.71  | 1.64  | -1.05 | -0.78 | -0.53 |
| -0.50 | 1.02  | -0.92 | -0.65 | 1.05  | 1.80  | -0.64 | -0.97 | -0.69 | 0.49  |
| -1.02 | 0.87  | 0.49  | 0.47  | -0.80 | -0.97 | -1.50 | 1.58  | 0.41  | 0.47  |
| -0.46 | -0.39 | 0.59  | 0.51  | -0.22 | -1.37 | -1.66 | 1.13  | 0.52  | 1.35  |
| -0.90 | 0.71  | 1.31  | 0.76  | -1.86 | -0.53 | -0.04 | -0.78 | 0.39  | 0.94  |
| 0.47  | 0.95  | -1.43 | 0.68  | -0.65 | 1.09  | -0.58 | -1.57 | 0.08  | 0.96  |
| 0.90  | 0.92  | -1.47 | -0.04 | -0.22 | 0.46  | 0.81  | -2.00 | 0.16  | 0.49  |
| -0.94 | -0.64 | -0.30 | 0.43  | 1.46  | 0.74  | -2.00 | 0.60  | 0.64  | 0.01  |
| -1.53 | 0.32  | 0.11  | 1.25  | -0.14 | -0.75 | -1.25 | -0.32 | 1.37  | 0.92  |
| -1.14 | -0.35 | -0.98 | 1.23  | 1.25  | -1.58 | 0.45  | -0.05 | 0.87  | 0.29  |
| 0.57  | -1.00 | -1.45 | 0.94  | 0.96  | 0.91  | -1.26 | -0.82 | 0.75  | 0.39  |
| -0.26 | 1.72  | -0.54 | -0.42 | -0.49 | -0.33 | -0.39 | -0.86 | -0.44 | 2.02  |
| 0.45  | 0.28  | -0.24 | -0.31 | -0.17 | 1.64  | 0.68  | -2.32 | -0.07 | 0.06  |
| 0.24  | 1.44  | -1.53 | 1.00  | -1.13 | -1.16 | 0.89  | -0.10 | 0.34  | 0.01  |
| 0.67  | 1.40  | -1.22 | -1.00 | 0.17  | 0.72  | 1.08  | 0.33  | -1.12 | -1.02 |
| 1.13  | -0.08 | -0.72 | 0.42  | -0.63 | -0.02 | 0.74  | -2.25 | 0.81  | 0.61  |
| 1.11  | -0.12 | -0.80 | 0.00  | -0.06 | 0.64  | 0.98  | -2.27 | -0.22 | 0.74  |
| 0.43  | -0.26 | -0.59 | 0.70  | -0.24 | -0.03 | -1.82 | -0.83 | 0.88  | 1.76  |
| -1.50 | -0.08 | 0.44  | 0.86  | 0.29  | -1.23 | -1.28 | 1.16  | 1.08  | 0.25  |
| 0.75  | -0.16 | -1.45 | -0.72 | 1.61  | 0.40  | 0.84  | -1.31 | -0.54 | 0.59  |
| 0.26  | 1.34  | -2.09 | 0.42  | 0.09  | 0.20  | 1.05  | -1.10 | -0.43 | 0.25  |
| -2.30 | 0.80  | -0.18 | 0.65  | 1.07  | -1.04 | 0.29  | 0.34  | 0.44  | -0.08 |
| 1.03  | 0.41  | -1.00 | -0.07 | -0.19 | 0.40  | 0.82  | -2.33 | 0.50  | 0.43  |
| 0.81  | -0.88 | 0.54  | -0.54 | 0.11  | 0.04  | 1.51  | -1.90 | -0.56 | 0.88  |
| 0.19  | -1.41 | -0.92 | 0.29  | 1.88  | -0.44 | -0.70 | -0.10 | 1.33  | -0.12 |



|        |                                                                |           |       |      |       |       |       |       |       |       |       |       |       |       |
|--------|----------------------------------------------------------------|-----------|-------|------|-------|-------|-------|-------|-------|-------|-------|-------|-------|-------|
| O60583 | Cyclin-T2                                                      | CCNT2     | -0.02 | 0.12 | 1.16  | -0.35 | -1.56 | 0.63  | 0.29  | 0.52  | 0.42  | -1.95 | 0.52  | 0.33  |
| Q86Y82 | Syntaxin-12                                                    | STX12     | -0.02 | 0.02 | -1.69 | 1.17  | -0.70 | -0.10 | 1.35  | -1.32 | 0.20  | 0.14  | 0.14  | 0.79  |
| Q9UHL0 | ATP-dependent RNA helicase DDX25                               | DDX25     | -0.02 | 0.02 | 1.96  | -0.20 | -0.95 | 0.37  | -1.15 | 0.11  | 1.29  | -0.97 | -0.13 | -0.33 |
| Q5TA45 | Integrator complex subunit 11                                  | INTS11    | -0.02 | 0.01 | -0.63 | -0.73 | -0.84 | 1.26  | 0.95  | -0.72 | -0.65 | -1.00 | 0.90  | 1.45  |
| Q9BVL4 | Protein adenyltransferase SelO, mitochondrial                  | SELENVO   | -0.02 | 0.01 | 1.49  | -0.50 | -1.36 | -0.04 | 0.41  | 0.82  | 1.27  | -1.40 | -0.31 | -0.40 |
| O00635 | E3 ubiquitin-protein ligase TRIM38                             | TRIM38    | -0.02 | 0.02 | -0.47 | 0.33  | -0.77 | 1.68  | -0.74 | -0.65 | -0.51 | -0.97 | 1.72  | 0.38  |
| Q96N66 | Lysophospholipid acyltransferase 7                             | MBOAT7    | -0.02 | 0.05 | 0.20  | 1.68  | 0.02  | -0.03 | -1.80 | 0.80  | 0.18  | 0.30  | -1.46 | 0.10  |
| P8NSA5 | Zinc finger CCHC-type with G patch domain-containing protein   | ZGPAT     | -0.02 | 0.02 | 1.43  | -0.57 | -1.00 | -0.85 | 1.02  | 1.10  | 0.10  | -1.19 | -0.82 | 0.77  |
| K04090 | Enhancer of rudimentary homolog                                | ERH       | -0.02 | 0.02 | -0.30 | -0.41 | -0.68 | -0.51 | 1.94  | -0.39 | -0.49 | 1.84  | -0.50 | -0.50 |
| Q6ZT12 | E3 ubiquitin-protein ligase UBR3                               | UBR3      | -0.02 | 0.03 | 0.11  | 1.20  | -1.04 | 0.00  | -0.23 | -1.30 | 2.02  | -0.79 | 0.11  | -0.09 |
| Q9BQ24 | Zinc finger FYVE domain-containing protein 21                  | ZFYVE21   | -0.02 | 0.05 | 0.17  | -0.28 | 1.40  | 0.56  | -1.77 | -0.49 | -1.39 | 0.26  | 0.62  | 0.92  |
| Q8TF42 | Ubiquitin-associated and SH3 domain-containing protein B       | UBASH3B   | -0.02 | 0.02 | -0.36 | 1.27  | -0.98 | 0.94  | -0.84 | 0.87  | -1.11 | -1.25 | 0.56  | 0.91  |
| P05114 | Non-histone chromosomal protein HMG-14                         | HMG14     | -0.02 | 0.03 | 0.96  | 0.17  | 1.07  | 0.16  | -2.31 | -0.14 | 0.69  | -0.98 | 0.06  | 0.32  |
| O60486 | Plexin-C1                                                      | PLXNC1    | -0.02 | 0.03 | 1.82  | -0.29 | -1.01 | -0.63 | 0.15  | 0.63  | 1.29  | -1.39 | -0.22 | -0.35 |
| Q8WYL5 | Protein phosphatase Slingshot homolog 1                        | SSH1      | -0.02 | 0.02 | -1.02 | 1.06  | -1.26 | 0.21  | 1.04  | -1.07 | -1.05 | 1.13  | 0.72  | 0.24  |
| Q9NZD8 | Maspardin                                                      | SPG21     | -0.02 | 0.02 | 0.18  | 1.08  | -1.50 | 0.25  | 0.03  | 0.34  | -0.70 | -1.68 | 0.82  | 1.18  |
| P02766 | Transthyretin                                                  | TTR       | -0.02 | 0.02 | 1.51  | 0.26  | -0.65 | -0.56 | -0.53 | -0.51 | -0.52 | 2.12  | -0.61 | -0.51 |
| Q5VUB5 | Protein FAM171A1                                               | FAM171A1  | -0.02 | 0.06 | -0.73 | -0.14 | 0.66  | 0.52  | -0.23 | -0.67 | 1.51  | -0.55 | 1.33  | -1.70 |
| C9798  | Ras GTPase-activating protein 4B                               | RASA4B    | -0.02 | 0.02 | 1.37  | -0.53 | -0.44 | -0.16 | -0.22 | 1.16  | 1.10  | -1.95 | 0.14  | -0.48 |
| P54578 | Ubiquitin carboxyl-terminal hydrolase 14                       | USP14     | -0.02 | 0.07 | 0.10  | 1.95  | -0.78 | -0.14 | -1.02 | -0.05 | 1.05  | -1.53 | 0.24  | 0.19  |
| O15131 | Importin subunit alpha-6                                       | KPNA5     | -0.02 | 0.05 | -0.11 | -0.38 | -0.87 | 1.81  | -0.38 | -0.42 | -0.19 | -0.91 | 1.86  | -0.41 |
| Q15185 | Prostaglandin E synthase 3                                     | PTGES3    | -0.02 | 0.06 | 0.70  | -0.44 | -1.66 | 1.18  | 0.30  | 0.58  | -0.08 | -1.72 | 0.84  | 0.30  |
| Q9H115 | Beta-soluble NSF attachment protein                            | NAPB      | -0.03 | 0.06 | 0.76  | -0.06 | -0.23 | 0.09  | -0.47 | 1.92  | 0.71  | -1.87 | -0.23 | -0.62 |
| Q8TDY4 | Arf-GAP with SH3 domain, ANK repeat and PH domain-containing   | ASAP3     | -0.03 | 0.03 | 0.41  | -0.06 | -0.07 | -0.04 | -0.18 | 1.37  | -0.29 | -2.44 | 0.64  | 0.67  |
| P26992 | Ciliary neurotrophic factor receptor subunit alpha             | CNTRF     | -0.03 | 0.03 | -0.68 | 1.56  | 1.03  | -0.87 | -0.99 | -0.94 | -0.92 | 1.02  | 0.72  | 0.08  |
| Q5TCZ1 | SH3 and PX domain-containing protein 2A                        | SH3PX2A   | -0.03 | 0.03 | 0.07  | 1.28  | -1.86 | 0.90  | -0.35 | 0.02  | 0.03  | -1.43 | 0.73  | 0.61  |
| Q9UKD1 | Glucocorticoid modulatory element-binding protein 2            | GMEB2     | -0.03 | 0.18 | 1.03  | 0.54  | -0.85 | 0.01  | -0.47 | 0.85  | 0.83  | -2.27 | -0.07 | 0.40  |
| Q96MM6 | Heat shock 70 kDa protein 12B                                  | HSPA12B   | -0.03 | 0.14 | 0.80  | -0.04 | -0.92 | 0.31  | 0.04  | 0.43  | -0.12 | -2.17 | 0.07  | 1.58  |
| O95989 | Diphosphoinositol polyphosphate phosphohydrolase 1             | NUDT3     | -0.03 | 0.12 | 0.67  | -0.18 | 0.05  | 1.28  | -1.65 | -0.01 | -1.20 | -0.38 | 1.60  | -0.19 |
| Q92900 | Regulator of nonsense transcripts 1                            | UPF1      | -0.03 | 0.02 | 1.54  | -0.50 | -1.82 | 0.29  | 0.51  | 1.23  | -0.28 | -1.02 | 0.20  | -0.16 |
| P35251 | Replication factor C subunit 1                                 | RFC1      | -0.03 | 0.02 | -0.04 | -0.44 | -1.01 | 0.80  | 0.72  | 1.59  | -0.84 | -1.10 | 1.18  | -0.87 |
| P13807 | Glycogen [starch] synthase, muscle                             | GYS1      | -0.03 | 0.05 | -0.94 | 0.40  | 0.35  | 1.23  | -0.98 | 0.84  | -0.71 | -1.73 | 0.71  | 0.81  |
| P57088 | Transmembrane protein 33                                       | TMEM33    | -0.03 | 0.03 | 1.04  | -0.36 | -1.78 | 0.73  | 0.42  | 0.86  | -1.15 | -1.01 | 0.65  | 0.62  |
| Q9BV86 | N-terminal Xaa-Pro-Lys N-methyltransferase 1                   | NTMT1     | -0.03 | 0.27 | 1.45  | 0.13  | -1.44 | 0.08  | 0.16  | -0.05 | 0.10  | -1.91 | 0.87  | 0.62  |
| Q9H479 | Fructosamine 3-kinase                                          | FN3K      | -0.03 | 0.11 | 0.64  | -0.76 | 1.64  | 0.47  | -1.82 | -0.70 | -0.67 | -0.09 | 0.70  | 0.59  |
| O15083 | ERC protein 2                                                  | ERC2      | -0.03 | 0.02 | -0.05 | -0.95 | 1.02  | -0.80 | 0.82  | 1.07  | 0.21  | -1.22 | -1.29 | 1.19  |
| P28074 | Proteasome subunit beta type-5                                 | PSMB5     | -0.03 | 0.06 | -1.38 | -0.70 | 0.48  | 0.47  | 1.22  | -1.40 | -0.84 | 1.26  | 0.60  | 0.29  |
| Q15596 | Nuclear receptor coactivator 2                                 | NCOA2     | -0.03 | 0.02 | 1.40  | -0.98 | -1.07 | -0.24 | 0.93  | 0.72  | 1.36  | -0.77 | -0.38 | -0.95 |
| Q9ULN7 | Paraneoplastic antigen-like protein 8B                         | PNMA8B    | -0.03 | 0.04 | -1.00 | -1.05 | -0.41 | 0.61  | 1.91  | -1.12 | 0.09  | 0.79  | 0.72  | -0.54 |
| Q92540 | Protein SMG7                                                   | SMG7      | -0.03 | 0.05 | -0.92 | -1.08 | -0.50 | 0.99  | 1.58  | 0.07  | 1.00  | -1.48 | 0.25  | 0.09  |
| Q9NZQ3 | NCK-interacting protein with SH3 domain                        | NCK1PSD   | -0.03 | 0.04 | 1.12  | 0.75  | -1.74 | 0.71  | -0.78 | -0.60 | -0.79 | 1.21  | 0.60  | -0.48 |
| Q5MN26 | WD repeat domain phosphoinositide-interacting protein 3        | WDR45B    | -0.03 | 0.03 | -0.66 | -0.25 | 0.50  | -0.78 | 1.24  | 0.18  | -0.75 | 2.07  | -0.80 | -0.75 |
| Q8TEH3 | DENN domain-containing protein 1A                              | DENND1A   | -0.03 | 0.05 | -1.67 | -0.03 | 1.69  | -1.09 | 1.17  | -0.49 | -0.32 | 0.52  | 0.42  | -0.20 |
| Q86Y13 | E3 ubiquitin-protein ligase DZIP3                              | DZIP3     | -0.03 | 0.26 | 1.10  | 0.90  | -1.37 | 0.17  | -0.44 | 0.35  | 0.57  | -2.03 | 0.47  | 0.28  |
| K8IU81 | Interferon regulatory factor 2-binding protein 1               | IRF2BP1   | -0.03 | 0.03 | 1.93  | -0.88 | -0.82 | 0.56  | -0.74 | 0.76  | 0.37  | -1.00 | 0.71  | -0.89 |
| P01008 | Antithrombin-III                                               | SERPINC1  | -0.03 | 0.12 | -0.70 | 1.71  | -0.12 | -0.63 | -0.09 | -0.69 | -1.48 | 1.54  | 0.26  | 0.20  |
| Q13586 | Stromal interaction molecule 1                                 | STIM1     | -0.04 | 0.05 | 0.04  | 2.19  | -0.83 | -0.65 | -0.68 | -0.65 | 0.85  | -1.06 | 0.52  | 0.27  |
| O43347 | RNA-binding protein Musashi homolog 1                          | MSI1      | -0.04 | 0.04 | -0.23 | 0.87  | -0.25 | -1.83 | 1.51  | 0.40  | -0.51 | 0.05  | -1.02 | 1.02  |
| P68366 | Tubulin alpha-4A chain                                         | TUBA4A    | -0.04 | 0.09 | 1.23  | 0.84  | -2.09 | 0.62  | -0.47 | 0.05  | 0.13  | -1.10 | 0.77  | 0.02  |
| Q9Y490 | Talin-1                                                        | TLN1      | -0.04 | 0.04 | -1.70 | 0.45  | -0.47 | 1.07  | 0.70  | -1.06 | -1.00 | 0.86  | 1.08  | 0.06  |
| Q8WYA6 | Beta-catenin-like protein 1                                    | CTNNBL1   | -0.04 | 0.04 | -0.45 | -0.96 | -0.15 | 0.80  | 0.82  | -1.09 | -0.12 | -1.33 | 0.75  | 1.73  |
| P17010 | Zinc finger X-chromosomal protein                              | ZFX       | -0.04 | 0.06 | -2.07 | 0.11  | -0.01 | 0.82  | 1.24  | -1.36 | 0.03  | 0.36  | 0.67  | 0.22  |
| Q14156 | Protein EFR3 homolog A                                         | EFR3A     | -0.04 | 0.04 | 0.25  | 1.02  | 0.22  | 0.29  | -1.73 | 0.52  | 0.38  | -1.96 | 0.56  | 0.45  |
| Q9NT99 | Leucine-rich repeat-containing protein 4B                      | LRRC4B    | -0.04 | 0.04 | 0.31  | -0.89 | 0.92  | 0.60  | -0.87 | -0.89 | -0.77 | 2.01  | 0.35  | -0.77 |
| Q61B50 | Twinfilin-2                                                    | TWF2      | -0.04 | 0.08 | 0.16  | 0.45  | -1.24 | 0.49  | 0.26  | 0.07  | 1.55  | -2.09 | 0.36  | -0.01 |
| Q8IUC1 | Keratin-associated protein 11-1                                | KRTAP11-1 | -0.04 | 0.05 | -0.16 | 1.81  | -0.58 | -0.53 | -0.47 | -0.54 | -0.53 | 1.96  | -0.50 | -0.46 |
| P43034 | Platelet-activating factor acetylhydrolase 1B subunit alpha    | PAFAH1B1  | -0.04 | 0.15 | 0.45  | -1.49 | 0.28  | 1.67  | -0.70 | 0.43  | 0.43  | -1.41 | 0.89  | 0.29  |
| Q9Y256 | Translation machinery-associated protein 7                     | TMA7      | -0.04 | 0.10 | 0.67  | -0.53 | 1.83  | 0.09  | -1.92 | -0.42 | 0.06  | -0.75 | 0.41  | 0.56  |
| Q08379 | Golgin subfamily A member 2                                    | GOLGA2    | -0.04 | 0.03 | 1.01  | -0.57 | -0.33 | -0.92 | 0.87  | 0.80  | 1.21  | -1.43 | -1.21 | 0.58  |
| O95182 | NADH dehydrogenase [ubiquinone] 1 alpha subcomplex subunit 7   | NDUFA7    | -0.04 | 0.32 | 1.83  | 0.24  | -1.15 | 0.23  | -0.71 | 0.14  | 0.15  | -1.65 | -0.05 | 0.98  |
| Q6NUQ1 | RAD50-interacting protein 1                                    | RINT1     | -0.04 | 0.05 | 0.54  | 0.21  | 0.08  | 0.74  | -1.48 | -0.03 | -0.13 | -1.95 | 0.94  | 1.09  |
| Q06124 | Tyrosine-protein phosphatase non-receptor type 11              | PTPN11    | -0.04 | 0.18 | 0.92  | 0.90  | 0.66  | 0.33  | -2.54 | -0.05 | -0.06 | 0.11  | 0.23  | -0.50 |
| P62854 | 40S ribosomal protein S26                                      | RPS26     | -0.04 | 0.06 | -1.28 | -0.99 | 0.43  | -0.15 | 2.07  | -0.94 | -0.15 | 0.28  | -0.21 | 0.94  |
| Q5TC12 | ATP synthase mitochondrial F1 complex assembly factor 1        | ATPAF1    | -0.04 | 0.03 | 1.12  | -0.09 | -0.87 | 0.21  | -0.32 | 1.16  | 1.23  | -1.93 | 0.01  | -0.52 |
| Q9UBEO | SUMO-activating enzyme subunit 1                               | SAE1      | -0.04 | 0.08 | 1.08  | -1.08 | -0.18 | -0.75 | 1.06  | 1.35  | 0.92  | -1.16 | -0.89 | -0.35 |
| A7XYQ1 | Sine oculis-binding protein homolog                            | SOBP      | -0.04 | 0.43 | 1.33  | 0.24  | -1.10 | -0.10 | 0.19  | 0.73  | -0.03 | -2.22 | 0.51  | 0.44  |
| O75112 | LIM domain-binding protein 3                                   | LDB3      | -0.04 | 0.05 | -0.23 | -0.42 | -0.57 | 1.78  | -0.51 | -0.43 | -0.35 | -0.78 | 1.97  | -0.47 |
| P50148 | Guanine nucleotide-binding protein (Gq) subunit alpha          | GNAQ      | -0.04 | 0.14 | -0.28 | 1.43  | 0.00  | 0.46  | -1.40 | 0.68  | -0.07 | -1.88 | 0.82  | 0.24  |
| P83731 | 60S ribosomal protein L24                                      | RPL24     | -0.04 | 0.11 | 0.41  | -0.87 | 0.54  | -0.36 | 0.43  | -0.43 | 1.46  | -1.69 | -0.78 | 1.30  |
| Q96N96 | Spermatogenesis-associated protein 13                          | SPATA13   | -0.04 | 0.05 | -0.58 | 1.45  | -0.78 | 0.80  | -0.81 | -0.75 | -0.66 | -0.97 | 0.98  | 1.32  |
| Q96LR5 | Ubiquitin-conjugating enzyme E2 E2                             | UBE2E2    | -0.04 | 0.36 | 1.16  | 0.44  | -1.67 | 0.70  | -0.14 | 0.62  | 0.05  | -1.86 | 0.20  | 0.52  |
| O60610 | Protein diaphanous homolog 1                                   | DIAPH1    | -0.04 | 0.05 | -1.43 | 1.14  | -0.50 | 0.69  | 0.17  | -1.62 | 1.24  | -0.49 | 0.70  | 0.10  |
| Q04637 | Eukaryotic translation initiation factor 4 gamma 1             | EIF4G1    | -0.04 | 0.15 | 0.33  | 1.37  | -0.35 | 0.44  | -1.58 | 0.33  | 0.86  | -1.71 | -0.28 | 0.59  |
| Q15631 | Translin                                                       | TSN       | -0.04 | 0.14 | 1.68  | -1.18 | 1.13  | 0.18  | -1.60 | -0.71 | 0.28  | 0.50  | -0.28 | 0.01  |
| P50897 | Palmitoyl-protein thioesterase 1                               | PPT1      | -0.04 | 0.06 | 0.10  | 0.49  | -0.55 | -1.30 | 1.35  | -0.68 | 1.80  | 0.01  | -1.10 | -0.10 |
| Q13162 | Peroxioredoxin-4                                               | PRDX4     | -0.05 | 0.06 | -1.16 | 1.38  | -0.71 | 0.41  | 0.16  | 1.26  | 0.26  | -0.79 | 0.71  | -1.51 |
| Q9HBY8 | Golgi reassembly-stacking protein 2                            | GORASP2   | -0.05 | 0.06 | 0.58  | 0.21  | -0.73 | 0.30  | -0.26 | 0.50  | 0.39  | -2.46 | 0.31  | 1.17  |
| Q0VDF9 | Heat shock 70 kDa protein 14                                   | HSPA14    | -0.05 | 0.05 | -0.16 | 0.25  | -0.64 | 1.04  | -0.42 | -1.45 | -1.45 | 1.35  | 0.96  | 0.52  |
| O94916 | Nuclear factor of activated T-cells 5                          | NFAT5     | -0.05 | 0.04 | 0.31  | -0.92 | -1.08 | 0.79  | 0.97  | 1.48  | 0.78  | -1.21 | -0.08 | -1.03 |
| P08235 | Mineralocorticoid receptor                                     | NR3C2     | -0.05 | 0.14 | -0.08 | -0.25 | -0.59 | 1.74  | -0.62 | 1.82  | -0.23 | -1.23 | -0.54 | -0.02 |
| Q9BYB4 | Guanine nucleotide-binding protein subunit beta-like protein 1 | GNB1L     | -0.05 | 0.06 | 0.59  | -0.39 | -1.33 | 0.29  | 0.93  | 1.29  | 0.70  | -1.54 | 0.48  | -1.02 |
| P38405 | Guanine nucleotide-binding protein (Golf) subunit alpha        | GNAL      | -0.05 | 0.06 | 1.96  | -0.41 | -0.61 | -0.32 | -0.53 | 1.77  | -0.36 | -0.87 | -0.37 | -0.26 |
| P06241 | Tyrosine-protein kinase Fyn                                    | FYN       | -0.05 | 0.11 | -0.43 | 1.51  | -0.76 | 0.34  | -0.51 | 0.96  | -0.09 | -2.02 | 0.33  | 0.67  |

|        |                                                                        |           |       |      |       |       |       |       |       |       |       |       |       |       |
|--------|------------------------------------------------------------------------|-----------|-------|------|-------|-------|-------|-------|-------|-------|-------|-------|-------|-------|
| Q9UBN7 | Histone deacetylase 6                                                  | HDAC6     | -0.05 | 0.08 | 0.23  | 1.14  | -1.01 | 0.35  | -0.58 | 0.17  | -0.22 | -2.04 | 0.92  | 1.05  |
| Q0V0G4 | Secernin-3                                                             | SCRN3     | -0.05 | 0.07 | 2.15  | -0.54 | -0.68 | -0.33 | -0.51 | -0.54 | -0.40 | 1.59  | -0.42 | -0.33 |
| Q9BQ39 | ATP-dependent RNA helicase DDX50                                       | DDX50     | -0.05 | 0.06 | 1.31  | -0.91 | -1.06 | 0.21  | 0.54  | 0.34  | 1.79  | -0.55 | -0.85 | -0.81 |
| Q9HC52 | Chromobox protein homolog 8                                            | CBX8      | -0.05 | 0.05 | -0.59 | -0.62 | -0.95 | 0.59  | 1.64  | -0.64 | -0.58 | -1.07 | 1.19  | 1.01  |
| Q13185 | Chromobox protein homolog 3                                            | CBX3      | -0.05 | 0.12 | -0.15 | -0.38 | 0.69  | -0.05 | 0.07  | 1.02  | -2.50 | -0.10 | 0.52  | 0.88  |
| Q99614 | Tetratricopeptide repeat protein 1                                     | TTC1      | -0.05 | 0.05 | 0.67  | -0.70 | -0.86 | -0.66 | 1.62  | -0.77 | 0.98  | 1.24  | -0.74 | -0.78 |
| Q9UNX3 | 60S ribosomal protein L26-like 1                                       | RPL26L1   | -0.05 | 0.18 | -0.30 | -0.80 | 1.25  | -0.14 | 0.25  | -1.08 | 0.21  | 0.39  | -1.51 | 1.73  |
| Q52100 | Zinc finger CCHC domain-containing protein 13                          | ZC3H13    | -0.05 | 0.37 | 1.42  | 0.47  | -1.04 | 0.26  | -0.62 | 0.46  | 0.56  | -2.08 | -0.06 | 0.62  |
| P32119 | Peroxiredoxin-2                                                        | PRDX2     | -0.05 | 0.06 | -0.94 | -0.07 | -0.19 | -0.26 | 1.55  | -0.68 | -0.90 | 2.03  | -0.46 | -0.07 |
| Q8WU79 | Stromal membrane-associated protein 2                                  | SMAP2     | -0.05 | 0.08 | 1.42  | 0.13  | -1.14 | 0.04  | -0.34 | 1.14  | 1.10  | -1.44 | 0.08  | -0.98 |
| Q9UNE7 | E3 ubiquitin-protein ligase CHIP                                       | STUB1     | -0.05 | 0.08 | 0.00  | 1.58  | -0.49 | -0.23 | -0.75 | 0.80  | 1.02  | -1.98 | -0.15 | 0.19  |
| Q81W45 | ATP-dependent (S)-NAD(P)H-hydrate dehydratase                          | NAXD      | -0.05 | 0.04 | -1.23 | -0.03 | 0.65  | -0.52 | 1.20  | -0.41 | -1.35 | 1.83  | 0.00  | -0.12 |
| Q8WW12 | PEST proteolytic signal-containing nuclear protein                     | PCNP      | -0.05 | 0.17 | 0.91  | -1.90 | 0.88  | 0.68  | -0.32 | 0.65  | -1.60 | 0.13  | 0.45  | 0.12  |
| Q16181 | Septin-7                                                               | SEPTIN7   | -0.05 | 0.27 | 1.04  | 0.83  | -1.42 | -0.75 | 0.68  | 0.10  | 1.43  | -0.90 | -1.14 | 0.14  |
| Q9BW83 | Intraflagellar transport protein 27 homolog                            | IFT27     | -0.05 | 0.09 | 0.72  | 0.37  | -0.82 | 0.93  | -1.08 | 0.42  | -0.69 | -1.78 | 1.02  | 0.89  |
| Q16795 | NADH dehydrogenase [ubiquinone] 1 alpha subcomplex subunit 9           | NDUFA9    | -0.05 | 0.05 | -0.71 | 0.86  | 1.57  | -0.83 | -0.82 | -0.82 | -0.56 | -0.71 | 0.55  | 1.46  |
| Q9BP27 | Target of rapamycin complex 2 subunit MAPKAP1                          | MAPKAP1   | -0.05 | 0.06 | 2.17  | -0.58 | -0.70 | -0.11 | -0.67 | -0.46 | -0.49 | -0.85 | 0.43  | 1.28  |
| P55060 | Exportin-2                                                             | CSE1L     | -0.05 | 0.04 | 0.78  | -0.75 | 0.18  | -0.28 | 0.13  | 0.79  | -2.36 | 1.10  | -0.10 | 0.50  |
| P27707 | Deoxycytidine kinase                                                   | DCK       | -0.05 | 0.06 | 0.75  | 1.57  | -0.89 | -0.53 | -0.80 | 1.22  | -0.66 | -0.96 | -0.67 | 0.98  |
| Q15750 | TGF-beta-activated kinase 1 and MAP3K7-binding protein 1               | TAB1      | -0.05 | 0.10 | 0.72  | 1.08  | -1.02 | 1.08  | -1.71 | -0.04 | -0.33 | -0.99 | 1.04  | 0.18  |
| Q723G6 | Prickle-like protein 2                                                 | PRICKLE2  | -0.05 | 0.06 | 1.48  | -0.12 | -0.98 | -0.12 | -0.16 | 1.05  | 1.35  | -0.20 | -1.46 | -0.84 |
| P56182 | Ribosomal RNA processing protein 1 homolog A                           | RRP1      | -0.05 | 0.13 | -0.05 | -0.43 | -0.96 | -0.49 | 2.11  | -0.30 | -0.39 | 1.55  | -0.45 | -0.60 |
| P06727 | Apolipoprotein A-IV                                                    | APOA4     | -0.05 | 0.05 | -0.61 | 0.20  | 1.43  | -0.02 | -0.92 | -0.83 | -0.91 | 1.50  | -0.90 | 1.06  |
| Q5JV50 | Intracellular hyaluronan-binding protein 4                             | HABP4     | -0.05 | 0.07 | 2.34  | -0.15 | -0.63 | -1.25 | -0.20 | -0.43 | 0.62  | -0.77 | -0.10 | 0.58  |
| P98160 | Basement membrane-specific heparan sulfate proteoglycan core           | HSPG2     | -0.06 | 0.07 | 1.50  | -2.13 | 1.08  | -0.04 | -0.30 | 0.50  | 0.38  | -0.07 | -0.71 | -0.21 |
| Q92882 | Osteoclast-stimulating factor 1                                        | OSTF1     | -0.06 | 0.05 | 0.38  | 0.30  | -0.58 | 0.13  | -0.15 | 2.39  | -0.19 | -1.53 | -0.39 | -0.36 |
| Q12857 | Nuclear factor 1 A-type                                                | NFIA      | -0.06 | 0.08 | 0.44  | -0.11 | -0.46 | 1.18  | -0.93 | -0.92 | -0.92 | 1.12  | 1.57  | -0.96 |
| P62306 | Small nuclear ribonucleoprotein F                                      | SNRPF     | -0.06 | 0.11 | 1.20  | 0.11  | 0.66  | -1.57 | -0.23 | -0.44 | 0.78  | -0.81 | -1.08 | 1.40  |
| Q659C4 | La-related protein 1B                                                  | LARP1B    | -0.06 | 0.12 | -0.90 | 1.05  | 0.00  | 1.27  | -1.24 | 0.04  | -0.97 | -1.01 | 1.34  | 0.43  |
| O75306 | NADH dehydrogenase [ubiquinone] iron-sulfur protein 2, mitochondrion   | NDUFS2    | -0.06 | 0.05 | -1.22 | -0.05 | 0.29  | 0.82  | 0.23  | -1.28 | 0.65  | -1.55 | 0.93  | 1.17  |
| P05023 | Sodium/potassium-transporting ATPase subunit alpha-1                   | ATP1A1    | -0.06 | 0.09 | 1.56  | 0.87  | -1.74 | -0.03 | -0.53 | 1.26  | -0.72 | -0.20 | -0.58 | 0.10  |
| Q9UMY4 | Sorting nexin-12                                                       | SNX12     | -0.06 | 0.20 | -0.65 | 1.45  | -0.24 | -0.04 | -0.24 | -0.09 | 0.81  | -2.05 | -0.16 | 1.21  |
| Q01130 | Serine/arginine-rich splicing factor 2                                 | SRSF2     | -0.06 | 0.09 | 0.78  | 0.79  | -0.37 | -1.48 | 0.41  | -1.29 | -0.10 | 0.19  | -0.68 | 1.75  |
| P49917 | DNA ligase 4                                                           | LIG4      | -0.06 | 0.38 | 1.61  | -0.17 | -1.02 | 0.49  | -0.40 | 0.60  | 0.36  | -2.06 | 0.26  | 0.34  |
| P03897 | NADH-ubiquinone oxidoreductase chain 3                                 | MT-ND3    | -0.06 | 0.50 | 1.32  | 0.08  | -0.27 | -0.07 | -0.40 | 0.94  | 0.01  | -2.33 | 0.83  | -0.09 |
| Q9Y5K5 | Ubiquitin carboxyl-terminal hydrolase isozyme L5                       | UCHL5     | -0.06 | 0.09 | 0.87  | -0.56 | -1.88 | 0.88  | 0.83  | 0.05  | 0.48  | -1.37 | 0.88  | -0.17 |
| Q9BRL6 | Serine/arginine-rich splicing factor 8                                 | SRSF8     | -0.06 | 0.60 | 0.79  | -0.54 | -0.88 | 0.90  | 0.49  | -0.28 | 0.87  | -2.24 | 0.50  | 0.39  |
| Q8N0X7 | Spartin                                                                | SPART     | -0.06 | 0.11 | 0.04  | 1.22  | -1.11 | 0.47  | -0.46 | 0.61  | 0.03  | -2.06 | 0.16  | 1.09  |
| P57772 | Selenocysteine-specific elongation factor                              | EEFSEC    | -0.06 | 0.08 | 1.01  | -0.29 | -1.70 | 0.66  | 0.43  | 0.48  | 0.17  | -1.86 | 0.68  | 0.42  |
| Q9NRG7 | Epimerase family protein SDR39U1                                       | SDR39U1   | -0.06 | 0.08 | -2.08 | 0.32  | 0.44  | 0.54  | 0.91  | -1.27 | -0.51 | 1.10  | 0.27  | 0.28  |
| Q8TF40 | Folliculin-interacting protein 1                                       | FNIP1     | -0.06 | 0.68 | 1.48  | -0.28 | -0.53 | 0.45  | -0.27 | -0.18 | 0.58  | -2.16 | -0.15 | 1.06  |
| Q14257 | Reticulocalbin-2                                                       | RCN2      | -0.06 | 0.09 | 1.43  | 0.77  | 0.56  | -1.85 | -0.76 | 0.57  | 0.69  | -0.93 | -0.60 | 0.14  |
| P62266 | 40S ribosomal protein S23                                              | RPS23     | -0.06 | 0.08 | -0.50 | -1.61 | -0.01 | -0.20 | 2.44  | -0.18 | 0.24  | 0.08  | -0.27 | 0.01  |
| O15145 | Actin-related protein 2/3 complex subunit 3                            | ARPC3     | -0.06 | 0.11 | 0.06  | 1.62  | -0.91 | 0.89  | -1.51 | -0.20 | 0.72  | -1.30 | 0.46  | 0.16  |
| Q08AD1 | Calmodulin-regulated spectrin-associated protein 2                     | CAMSAP2   | -0.06 | 0.25 | 0.27  | 0.97  | -2.08 | 1.31  | -0.12 | -0.84 | -0.74 | 0.20  | 0.74  | 0.29  |
| Q6VY07 | Phosphofurin acidic cluster sorting protein 1                          | PACS1     | -0.06 | 0.14 | 0.22  | 0.26  | -0.40 | 1.01  | -0.88 | -1.30 | 0.31  | -1.45 | 0.59  | 1.64  |
| Q92538 | Golgi-specific brefeldin A-resistance guanine nucleotide exchange GBF1 | GBF1      | -0.07 | 0.73 | 1.00  | -0.39 | -0.89 | 0.49  | 0.69  | 1.30  | 0.35  | -2.09 | -0.41 | -0.05 |
| P09471 | Guanine nucleotide-binding protein G(o) subunit alpha                  | GNAO1     | -0.07 | 0.17 | -0.73 | 2.08  | -0.02 | 0.35  | -1.43 | -0.07 | 0.20  | -1.22 | 0.64  | 0.20  |
| Q8WUD1 | Ras-related protein Rab-2B                                             | RAB2B     | -0.07 | 0.06 | 0.22  | 1.06  | -1.48 | 0.87  | -0.58 | -1.20 | 0.79  | 0.61  | 0.87  | -1.16 |
| Q6UXN9 | WD repeat-containing protein 82                                        | WDR82     | -0.07 | 0.15 | 1.29  | -0.72 | -1.01 | 0.76  | -0.10 | 0.58  | -0.61 | -1.71 | 0.31  | 1.21  |
| P52434 | DNA-directed RNA polymerases I, II, and III subunit RPABC3             | POLR2H    | -0.07 | 0.06 | 1.22  | -1.36 | 1.28  | 0.23  | -1.28 | 0.45  | 0.09  | 0.32  | -1.37 | 0.42  |
| Q9H313 | Protein tweety homolog 1                                               | TTYH1     | -0.07 | 0.18 | -0.58 | 0.56  | 0.77  | 0.78  | -1.28 | -1.16 | -0.28 | 1.55  | 0.72  | -1.09 |
| Q81Y57 | YY1-associated factor 2                                                | YAF2      | -0.07 | 0.63 | 1.48  | -0.17 | -1.28 | 0.72  | 0.04  | -0.43 | 0.68  | -1.90 | 0.49  | 0.37  |
| Q16643 | Drebrin                                                                | DBN1      | -0.07 | 0.13 | 0.75  | 1.31  | -0.62 | 0.05  | -1.31 | 0.59  | 1.21  | -1.63 | -0.44 | 0.09  |
| O43299 | AP-5 complex subunit zeta-1                                            | APSZ1     | -0.07 | 0.52 | 1.12  | 0.68  | -0.83 | -0.13 | -0.17 | 0.16  | 0.32  | -2.38 | 0.67  | 0.56  |
| Q3ZCQ8 | Mitochondrial import inner membrane translocase subunit TIM50          | TIMM50    | -0.07 | 0.07 | -0.50 | 1.15  | -0.81 | -0.73 | 0.99  | -0.67 | 1.47  | -1.08 | -0.76 | 0.94  |
| P10828 | Thyroid hormone receptor beta                                          | THRB      | -0.07 | 0.53 | 1.54  | -0.32 | -1.08 | 0.70  | -0.16 | 0.39  | 0.30  | -2.05 | 0.05  | 0.64  |
| P40818 | Ubiquitin carboxyl-terminal hydrolase 8                                | USP8      | -0.07 | 0.18 | 0.95  | 0.74  | -0.10 | 0.53  | -1.86 | -0.26 | -1.57 | 0.05  | 0.98  | 0.55  |
| P09429 | High mobility group protein B1                                         | HMGB1     | -0.07 | 0.17 | 0.47  | -1.55 | 1.29  | 0.71  | -0.69 | -1.56 | 0.25  | 0.01  | 1.11  | -0.06 |
| Q9NYU2 | UDP-glucose:glycoprotein glucosyltransferase 1                         | UGGT1     | -0.07 | 0.11 | 0.89  | 0.88  | 0.25  | -0.04 | -1.82 | 1.64  | -0.82 | -0.81 | 0.01  | -0.19 |
| P20794 | Serine/threonine-protein kinase MAK                                    | MAK       | -0.07 | 0.17 | -0.23 | 2.42  | -0.94 | -0.39 | -0.61 | -0.55 | 0.28  | 0.92  | -0.29 | -0.61 |
| Q96JC1 | Vam6/Vps39-like protein                                                | VPS39     | -0.07 | 0.14 | 0.20  | -0.56 | -1.41 | 1.28  | 0.70  | 0.47  | -1.68 | -0.48 | 1.01  | 0.48  |
| Q15154 | Pericentriolar material 1 protein                                      | PCM1      | -0.07 | 0.13 | -1.10 | 1.14  | 1.33  | -0.43 | -0.75 | -0.58 | 0.16  | -0.44 | -0.92 | 1.59  |
| Q6PJT7 | Zinc finger CCHC domain-containing protein 14                          | ZC3H14    | -0.07 | 0.12 | -1.15 | 0.97  | -1.66 | 0.73  | 1.28  | -0.33 | -0.18 | -0.90 | 0.43  | 0.80  |
| Q9H0E9 | Bromodomain-containing protein 8                                       | BRD8      | -0.07 | 0.08 | 2.05  | -0.78 | -0.91 | -0.79 | 0.55  | 0.32  | 1.00  | -1.11 | 0.03  | -0.35 |
| Q7LGD7 | RAS guanyl-releasing protein 2                                         | RASGRP2   | -0.07 | 0.07 | 0.40  | 0.29  | -1.92 | 1.02  | 0.31  | 0.37  | -1.78 | 0.59  | 0.42  | 0.29  |
| Q58FF6 | Putative heat shock protein HSP 90-beta 4                              | HSP90AB4P | -0.07 | 0.04 | -1.58 | 0.55  | 0.36  | 1.04  | -0.32 | -1.10 | -1.10 | -0.07 | 1.04  | 1.17  |
| Q12866 | Tyrosine-protein kinase Mer                                            | MERTK     | -0.07 | 0.07 | 0.34  | 0.11  | -1.24 | 0.73  | 0.16  | 0.00  | -1.14 | -1.50 | 1.21  | 1.32  |
| Q13885 | Tubulin beta-2A chain                                                  | TUBB2A    | -0.07 | 0.22 | -0.05 | 1.90  | -1.06 | 0.70  | -1.17 | 0.76  | -0.24 | -1.26 | 0.42  | 0.01  |
| O00562 | Membrane-associated phosphatidylinositol transfer protein 1            | PITPNM1   | -0.07 | 0.12 | 0.89  | 0.65  | -1.48 | 0.41  | -0.29 | 1.29  | -0.23 | -1.85 | 0.37  | 0.26  |
| P49903 | Selenide, water dikinase 1                                             | SEPHS1    | -0.07 | 0.10 | 0.80  | 0.04  | -1.05 | -0.78 | 1.14  | -0.82 | -0.71 | 1.84  | -0.80 | 0.35  |
| P27695 | DNA-(apurinic or apyrimidinic site) lyase                              | APEX1     | -0.07 | 0.36 | 0.18  | -0.16 | 1.07  | -0.13 | -0.46 | -0.01 | -2.18 | -0.13 | 0.16  | 1.67  |
| Q6ZNA1 | Zinc finger protein 836                                                | ZNF836    | -0.08 | 0.17 | 1.00  | -1.27 | -1.54 | 1.09  | 0.97  | 0.55  | -0.96 | -0.24 | 0.72  | -0.31 |
| Q96661 | U2 small nuclear ribonucleoprotein A'                                  | SNRPA1    | -0.08 | 0.08 | 1.16  | 0.55  | 0.19  | -0.82 | -0.96 | -0.84 | -0.87 | 1.66  | -0.89 | 0.82  |
| Q9BXX1 | Krüppel-like factor 16                                                 | KLF16     | -0.08 | 0.53 | 1.54  | -0.15 | -0.93 | -0.02 | 0.24  | 0.70  | 0.17  | -2.22 | 0.40  | 0.26  |
| P05771 | Protein kinase C beta type                                             | PRKCB     | -0.08 | 0.41 | 2.05  | -1.29 | -0.36 | 0.90  | -0.74 | -0.68 | 0.14  | -0.27 | 0.85  | -0.60 |
| O43719 | HIV Tat-specific factor 1                                              | HTATSF1   | -0.08 | 0.04 | 1.60  | -0.98 | -1.07 | 0.07  | 0.45  | 0.97  | 1.18  | -0.70 | -0.45 | -1.06 |
| Q6IPX3 | Transcription elongation factor A protein-like 6                       | TCEAL6    | -0.08 | 0.09 | 0.62  | 1.76  | -0.96 | -0.61 | -0.67 | 0.53  | 1.27  | -1.16 | -0.72 | -0.06 |
| Q94929 | Actin-binding LIM protein 3                                            | ABLIM3    | -0.08 | 0.14 | -0.20 | 1.32  | -1.31 | -0.22 | 0.62  | 1.58  | -0.41 | -1.46 | -0.31 | 0.41  |
| P61758 | Prefoldin subunit 3                                                    | VBP1      | -0.08 | 0.22 | 0.17  | -0.06 | 1.42  | -0.08 | -1.14 | 1.52  | 0.87  | -1.15 | -0.94 | -0.62 |
| P84095 | Rho-related GTP-binding protein RhoG                                   | RHOG      | -0.08 | 0.40 | -0.42 | -0.63 | -0.89 | 1.56  | 0.92  | -1.13 | -0.48 | 0.26  | 1.52  | -0.68 |
| Q9UID3 | Vacuolar protein sorting-associated protein 51 homolog                 | VPS51     | -0.08 | 0.22 | -1.55 | 0.82  | 0.62  | 0.00  | 0.42  | -1.89 | -0.22 | 0.02  | 0.59  | 1.18  |
| P21397 | Amine oxidase [flavin-containing] A                                    | MAOA      | -0.08 | 0.58 | 1.67  | 0.11  | -0.89 | 0.24  | -0.39 | 0.68  | 0.42  | -2.12 | 0.19  | 0.09  |

|        |                                                              |               |       |      |       |       |       |       |       |       |       |       |       |       |
|--------|--------------------------------------------------------------|---------------|-------|------|-------|-------|-------|-------|-------|-------|-------|-------|-------|-------|
| P29597 | Non-receptor tyrosine-protein kinase TYK2                    | TYK2          | -0.08 | 0.09 | -0.56 | 0.22  | -1.53 | 1.24  | 0.76  | -0.16 | -1.27 | -0.69 | 1.18  | 0.82  |
| Q5TEJ8 | Protein THEMIS2                                              | THEMIS2       | -0.08 | 0.14 | -0.43 | 1.64  | -0.74 | 0.52  | -0.79 | -1.15 | 0.42  | -1.18 | 0.46  | 1.25  |
| Q6PLI6 | Kv channel-interacting protein 4                             | KCNIP4        | -0.08 | 0.04 | -1.05 | 0.23  | -1.24 | 1.10  | 1.02  | -1.11 | -1.06 | 0.39  | 1.05  | 0.67  |
| Q13740 | CD166 antigen                                                | ALCAM         | -0.08 | 0.10 | 1.41  | 0.60  | -0.74 | -0.43 | -0.69 | -0.45 | -0.54 | 2.05  | -0.61 | -0.61 |
| Q5VT66 | Mitochondrial amidoxime-reducing component 1                 | 1-Mar         | -0.08 | 0.07 | 1.68  | 0.29  | 0.01  | 0.07  | -1.96 | 0.23  | 1.13  | -0.75 | -0.10 | -0.60 |
| Q96PK6 | RNA-binding protein 14                                       | RBM14         | -0.08 | 0.12 | 1.03  | -1.06 | -1.61 | 0.67  | 1.14  | 0.65  | -0.89 | -0.89 | 0.48  | 0.49  |
| Q86VS8 | Protein Hook homolog 3                                       | HOOK3         | -0.08 | 0.09 | 0.69  | -0.18 | -1.56 | 0.87  | 0.31  | 0.09  | 0.38  | -1.92 | 0.16  | 1.15  |
| Q92747 | Actin-related protein 2/3 complex subunit 1A                 | ARPC1A        | -0.08 | 0.53 | 0.01  | -0.74 | 0.61  | 0.73  | 0.08  | -1.92 | 0.17  | 1.52  | 0.61  | -1.07 |
| Q96RU3 | Formin-binding protein 1                                     | FBNP1         | -0.08 | 0.13 | 1.12  | 0.03  | 0.96  | -0.91 | -1.02 | 1.33  | 0.84  | -1.41 | -0.53 | -0.41 |
| Q6ZNV4 | Netrin receptor UNC5A                                        | UNC5A         | -0.08 | 0.08 | -0.01 | -0.21 | -0.82 | -0.55 | 1.71  | -0.25 | 1.93  | -0.89 | -0.32 | -0.59 |
| P08621 | U1 small nuclear ribonucleoprotein 70 kDa                    | SNRNP70       | -0.08 | 0.30 | 1.08  | -1.21 | 0.37  | -1.19 | 1.36  | -0.66 | 0.41  | -0.13 | -1.10 | 1.06  |
| P52907 | F-actin-capping protein subunit alpha-1                      | CAPZA1        | -0.08 | 0.12 | 1.55  | 0.69  | 0.03  | -0.48 | -1.61 | 0.20  | 1.34  | -0.26 | -0.32 | -1.14 |
| P62191 | 26S proteasome regulatory subunit 4                          | PSMC1         | -0.08 | 0.33 | 1.28  | 1.81  | -1.31 | -0.45 | -0.87 | -0.16 | -0.80 | -0.26 | 0.81  | -0.05 |
| P62081 | 40S ribosomal protein S7                                     | RPS7          | -0.08 | 0.16 | -1.33 | -1.13 | 0.12  | 1.11  | 1.47  | 0.62  | -0.97 | -0.84 | 0.65  | 0.31  |
| P27144 | Adenylate kinase 4, mitochondrial                            | AK4           | -0.08 | 0.10 | 0.19  | 0.77  | 0.83  | -1.86 | 0.20  | -0.83 | 0.75  | -1.41 | 0.55  | 0.80  |
| P23246 | Splicing factor, proline- and glutamine-rich                 | SFPQ          | -0.09 | 0.30 | 2.10  | -0.31 | -0.76 | -0.20 | -0.42 | 0.42  | -1.25 | -0.88 | 0.23  | 1.07  |
| Q81ZU2 | WD repeat-containing protein 17                              | WDR17         | -0.09 | 0.14 | -0.52 | 2.17  | -0.52 | -0.47 | -0.46 | 0.90  | 0.80  | -0.62 | -1.22 | -0.06 |
| A7MD48 | Serine/arginine repetitive matrix protein 4                  | SRRM4         | -0.09 | 0.05 | 1.02  | -0.34 | -1.56 | 0.03  | 0.92  | 1.17  | 0.97  | -0.45 | -0.39 | -1.38 |
| P28289 | Tropomodulin-1                                               | TMOD1         | -0.09 | 0.11 | -0.85 | 0.87  | 0.40  | -1.03 | 0.78  | -0.88 | -0.85 | 1.18  | -0.97 | 1.36  |
| Q9BUF5 | Tubulin beta-6 chain                                         | TUBB6         | -0.09 | 0.16 | 0.15  | 0.48  | -1.51 | 0.95  | 0.16  | 1.57  | -0.02 | -1.58 | 0.44  | -0.63 |
| Q15019 | Septin-2                                                     | SEPTIN2       | -0.09 | 0.22 | 1.09  | 0.47  | -0.14 | -1.87 | 0.76  | 0.66  | 0.95  | -0.31 | -1.44 | -0.17 |
| P54753 | Ephrin type-B receptor 3                                     | EPHB3         | -0.09 | 0.14 | 0.51  | 0.79  | -0.86 | 0.31  | -0.54 | 1.08  | 0.09  | -2.29 | 0.75  | 0.17  |
| P52943 | Cysteine-rich protein 2                                      | CRIP2         | -0.09 | 0.23 | 0.36  | 0.59  | -1.09 | 0.40  | 0.06  | -1.00 | 2.02  | -1.33 | 0.39  | -0.40 |
| Q9GZL7 | Ribosome biogenesis protein WDR12                            | WDR12         | -0.09 | 0.90 | 1.29  | -0.24 | -1.15 | 0.67  | 0.49  | 0.25  | 0.23  | -2.12 | -0.20 | 0.78  |
| Q9BY42 | Replication termination factor 2                             | RTF2          | -0.09 | 0.09 | 1.48  | -1.07 | -1.63 | 0.32  | 1.03  | 0.37  | 0.08  | -1.19 | 0.08  | 0.53  |
| Q9UIF9 | Bromodomain adjacent to zinc finger domain protein 2A        | BAZZA         | -0.09 | 0.14 | 2.05  | -0.40 | -0.83 | 0.02  | -0.63 | 1.48  | -0.39 | -1.06 | 0.01  | -0.25 |
| P49959 | Double-strand break repair protein MRE11                     | MRE11         | -0.09 | 0.18 | 0.94  | 0.46  | -2.20 | 0.87  | 0.19  | 0.18  | -1.27 | 0.16  | -0.09 | 0.76  |
| Q9H4F8 | SPARC-related modular calcium-binding protein 1              | SMOC1         | -0.09 | 0.22 | -0.35 | 1.64  | -0.95 | 0.96  | -0.98 | -0.50 | -0.62 | -0.99 | 0.58  | 1.21  |
| P23610 | Factor VIII intron 22 protein                                | F8A1          | -0.09 | 0.11 | 0.70  | 1.00  | -0.65 | 0.38  | -1.28 | -0.50 | 1.75  | -0.64 | 0.41  | -1.18 |
| Q9ULR3 | Protein phosphatase 1H                                       | PPM1H         | -0.09 | 0.34 | 1.06  | -0.52 | 0.19  | -0.10 | -0.16 | 1.98  | 0.10  | 0.02  | -0.89 | -1.68 |
| Q9UNT1 | Rab-like protein 2B                                          | RABL2B        | -0.09 | 0.10 | 0.70  | -0.47 | -1.01 | 0.85  | 0.06  | -0.41 | 1.48  | -1.90 | 0.76  | -0.07 |
| Q14247 | Src substrate cortactin                                      | CTTN          | -0.09 | 0.26 | 0.05  | 0.88  | -0.28 | 1.26  | -2.12 | -0.74 | -0.95 | 0.31  | 0.56  | 0.46  |
| P49458 | Signal recognition particle 9 kDa protein                    | SRP9          | -0.09 | 0.28 | -0.13 | 0.33  | -1.14 | 1.30  | 0.02  | -1.23 | -1.50 | 0.35  | 1.08  | 0.91  |
| Q15018 | PDZ domain-containing protein 2                              | PDZD2         | -0.09 | 0.22 | -0.40 | -0.82 | -0.01 | -0.61 | 2.16  | 0.72  | -1.32 | 0.55  | -0.64 | 0.38  |
| P00750 | Tissue-type plasminogen activator                            | PLAT          | -0.09 | 1.12 | 1.05  | 0.35  | -0.92 | 0.67  | 0.12  | 0.54  | 0.88  | -2.29 | -0.02 | -0.38 |
| P13647 | Keratin, type II cytoskeletal 5                              | KRT5          | -0.09 | 0.07 | -1.64 | 0.42  | 0.55  | -0.07 | 0.83  | -0.47 | -1.78 | 0.64  | 1.07  | 0.45  |
| Q9BRX2 | Protein pelota homolog                                       | PELO          | -0.09 | 0.10 | -0.27 | -0.54 | 0.43  | 0.37  | 0.17  | -0.95 | -2.04 | 1.55  | 0.65  | 0.65  |
| Q9NQ79 | Cartilage acidic protein 1                                   | CRTAC1        | -0.09 | 0.06 | -1.46 | -0.72 | 1.29  | 0.46  | 0.51  | -1.53 | -0.04 | 1.30  | 0.36  | -0.17 |
| P01023 | Alpha-2-macroglobulin                                        | A2M           | -0.09 | 0.12 | -1.47 | 0.13  | 0.09  | 1.01  | 0.41  | -1.02 | -1.54 | 0.35  | 1.04  | 0.99  |
| Q5VWN6 | Protein TASOR 2                                              | TASOR2        | -0.09 | 0.86 | 1.50  | -0.06 | -0.88 | 0.87  | -0.42 | 0.52  | -0.26 | -2.06 | 0.12  | 0.67  |
| O60266 | Adenylate cyclase type 3                                     | ADCY3         | -0.09 | 0.07 | 1.98  | -0.38 | -0.56 | -0.45 | -0.51 | 1.79  | -0.38 | -0.71 | -0.39 | -0.40 |
| Q9UQ88 | Cyclin-dependent kinase 11A                                  | CDK11A        | -0.09 | 0.14 | -1.09 | 0.13  | 0.33  | 0.02  | 0.82  | 1.13  | -2.31 | 0.13  | 0.56  | 0.28  |
| Q96555 | ATPase WRNIP1                                                | WRNIP1        | -0.09 | 0.10 | 1.21  | -1.93 | -0.34 | 0.11  | 1.10  | 0.60  | 1.01  | -0.77 | -0.36 | -0.62 |
| P49588 | Alanine-tRNA ligase, cytoplasmic                             | AARS          | -0.09 | 0.20 | 1.03  | -0.45 | 0.96  | 0.24  | -1.51 | 0.70  | 0.81  | -1.80 | -0.20 | 0.22  |
| P07196 | Neurofilament light polypeptide                              | NEFL          | -0.09 | 0.14 | 0.75  | -0.57 | 1.48  | -0.43 | -1.03 | 0.56  | 1.20  | -1.70 | -0.09 | -0.16 |
| Q68C22 | Tensin-3                                                     | TNS3          | -0.09 | 0.17 | 0.53  | 0.30  | -1.00 | 0.42  | 0.00  | 0.82  | -0.21 | -2.25 | 0.09  | 1.30  |
| Q96EE3 | Nucleoporin SEH1                                             | SEH1L         | -0.09 | 0.18 | 0.59  | -1.82 | -0.47 | 1.10  | 0.85  | -0.27 | -0.62 | -0.98 | 1.29  | 0.33  |
| P17152 | Transmembrane protein 11, mitochondrial                      | TMEM11        | -0.09 | 0.11 | -0.88 | 0.75  | 0.41  | -0.18 | 0.06  | -0.26 | 1.41  | -1.94 | -0.52 | 1.16  |
| Q86U42 | Polyadenylate-binding protein 2                              | PABPN1        | -0.09 | 0.14 | 0.83  | -0.84 | -0.80 | 0.67  | 0.35  | 0.12  | -2.06 | -0.28 | 0.91  | 1.11  |
| P61106 | Ras-related protein Rab-14                                   | RAB14         | -0.10 | 0.13 | 0.95  | 0.30  | -0.11 | -0.28 | -0.67 | -1.71 | -0.77 | 1.85  | -0.27 | 0.70  |
| Q99873 | Protein arginine N-methyltransferase 1                       | PRMT1         | -0.10 | 0.41 | 0.05  | -0.44 | 0.12  | 1.41  | -0.60 | 0.05  | -0.44 | -2.09 | 0.97  | 0.96  |
| P47813 | Eukaryotic translation initiation factor 1A, X-chromosomal   | EIF1AX        | -0.10 | 0.18 | 1.02  | 0.09  | 0.69  | -1.41 | -0.14 | 0.79  | 0.78  | -2.05 | 0.09  | 0.13  |
| Q9H1P3 | Oxysterol-binding protein-related protein 2                  | OSBPL2        | -0.10 | 0.15 | 0.44  | 1.00  | 0.02  | 0.14  | -1.39 | 1.17  | -0.41 | -1.91 | 0.16  | 0.79  |
| Q14764 | Major vault protein                                          | MVP           | -0.10 | 0.36 | -2.29 | 0.66  | 0.60  | 0.21  | 1.32  | -0.73 | -0.08 | 0.56  | 0.25  | -0.49 |
| Q15836 | Vesicle-associated membrane protein 3                        | VAMP3         | -0.10 | 0.10 | -1.09 | 0.85  | 0.65  | 0.93  | -1.18 | -1.21 | -1.14 | 0.67  | 0.85  | 0.67  |
| P49755 | Transmembrane emp24 domain-containing protein 10             | TMED10        | -0.10 | 0.27 | -0.25 | 0.76  | -0.38 | 0.58  | -0.33 | -0.80 | -2.19 | 0.70  | 0.98  | 0.94  |
| Q96B97 | SH3 domain-containing kinase-binding protein 1               | SHGKB1        | -0.10 | 0.14 | 1.45  | -0.23 | 0.52  | -0.14 | -1.39 | 0.96  | 1.03  | -1.56 | -0.17 | -0.46 |
| P51452 | Dual specificity protein phosphatase 3                       | DUSP3         | -0.10 | 0.20 | -1.53 | 1.11  | 0.32  | 0.27  | 0.10  | -0.50 | 1.18  | -1.80 | 0.41  | 0.43  |
| Q15796 | Mothers against decapentaplegic homolog 2                    | SMAD2         | -0.10 | 0.20 | -0.04 | -0.45 | -0.94 | 1.32  | 0.38  | -0.69 | -1.47 | -0.58 | 1.13  | 1.33  |
| Q147X3 | N-alpha-acetyltransferase 30                                 | NAA30         | -0.10 | 0.10 | -0.34 | 1.27  | 0.07  | 0.34  | -1.20 | 1.66  | 0.05  | -1.44 | -0.84 | 0.42  |
| Q8TEA8 | D-aminoacyl-tRNA deacylase 1                                 | DTD1          | -0.10 | 0.33 | -0.30 | 0.74  | 1.61  | 0.17  | -1.77 | -1.44 | 0.44  | -0.24 | 0.41  | 0.38  |
| Q9NVV2 | E3 ubiquitin-protein ligase RLIM                             | RLIM          | -0.10 | 0.89 | 1.31  | 0.52  | -0.66 | 0.01  | -0.13 | 0.04  | 0.88  | -2.34 | -0.17 | 0.53  |
| P04156 | Major prion protein                                          | PRNP          | -0.10 | 0.26 | -0.01 | 1.74  | -0.37 | -0.64 | -0.37 | -1.87 | 0.36  | 1.23  | -0.29 | 0.21  |
| Q94875 | Sorbin and SH3 domain-containing protein 2                   | SORBS2        | -0.10 | 0.13 | 0.36  | 0.86  | -0.10 | -0.02 | -0.90 | -2.06 | 0.28  | 1.58  | -0.48 | 0.50  |
| O43237 | Cytoplasmic dynein 1 light intermediate chain 2              | DYNC1L2       | -0.10 | 0.24 | -1.84 | 0.98  | 0.94  | 0.86  | -0.61 | -0.91 | -0.91 | 0.74  | 0.65  | 0.10  |
| Q6NVY1 | 3-hydroxyisobutyryl-CoA hydrolase, mitochondrial             | HIBCH         | -0.10 | 0.12 | -1.64 | -0.39 | 1.16  | 0.64  | 0.41  | -0.71 | -1.52 | 0.71  | 0.85  | 0.49  |
| Q8IU85 | Calcium/calmodulin-dependent protein kinase type 1D          | CAMK1D        | -0.10 | 0.23 | 1.02  | 0.41  | -2.28 | 0.95  | 0.22  | -0.54 | -0.53 | -0.16 | 1.02  | -0.11 |
| Q9NX14 | NADH dehydrogenase [ubiquinone] 1 beta subcomplex subunit 11 | NDUF11        | -0.10 | 0.87 | 1.08  | 0.46  | -1.01 | 0.12  | 0.39  | 0.03  | 0.60  | -2.34 | -0.11 | 0.78  |
| O60241 | Adhesion G protein-coupled receptor B2                       | ADGRB2        | -0.10 | 0.70 | 1.41  | 0.57  | -0.56 | 0.02  | -0.58 | -0.06 | 0.40  | -2.29 | 0.47  | 0.62  |
| Q96AG4 | Leucine-rich repeat-containing protein 59                    | LRRCS9        | -0.10 | 0.30 | -0.08 | -0.24 | 1.47  | -0.40 | -0.33 | -0.61 | 2.12  | -1.15 | -0.44 | -0.33 |
| P0DPB6 | DNA-directed RNA polymerases I and III subunit RPAC2         | POLR1D        | -0.10 | 0.94 | 1.11  | 0.46  | -0.88 | 0.22  | 0.20  | 0.23  | 0.56  | -2.45 | 0.59  | -0.03 |
| P61158 | Actin-related protein 3                                      | ACTR3         | -0.10 | 0.21 | 0.38  | 1.78  | -1.58 | 0.36  | -0.64 | -0.43 | 1.28  | -0.91 | -0.09 | -0.15 |
| Q9UJD0 | Regulating synaptic membrane exocytosis protein 3            | RIMS3         | -0.10 | 0.18 | 1.07  | 0.58  | -1.41 | -0.04 | 0.05  | 1.04  | 0.85  | -1.90 | 0.08  | -0.32 |
| Q8TAF3 | WD repeat-containing protein 48                              | WDR48         | -0.10 | 0.26 | -0.36 | -0.94 | -0.06 | 0.18  | 1.53  | -1.65 | 1.27  | 0.40  | 0.54  | -0.92 |
| P41250 | Glycine-tRNA ligase                                          | GARS          | -0.10 | 0.28 | -0.48 | -0.05 | 2.02  | 0.51  | -1.60 | -0.14 | -0.88 | 0.53  | 0.68  | -0.58 |
| P12277 | Creatine kinase B-type                                       | CKB           | -0.10 | 0.21 | 0.11  | 1.15  | -1.05 | 0.20  | -0.11 | 0.98  | -0.27 | -2.16 | 0.31  | 0.84  |
| O00445 | Synaptotagmin-5                                              | SYT5          | -0.10 | 0.12 | 0.58  | 1.18  | -0.21 | -0.08 | -1.30 | 0.05  | 1.60  | -1.60 | -0.55 | 0.33  |
| P07355 | Annexin A2                                                   | ANXA2         | -0.10 | 0.16 | -0.68 | 1.23  | 1.22  | -0.29 | -1.24 | -0.33 | -1.21 | 1.35  | -0.52 | 0.47  |
| E9PQ53 | NADH dehydrogenase [ubiquinone] 1 subunit C2, isoform 2      | NDUFC2-KCTD14 | -0.10 | 0.91 | 0.86  | 0.63  | -1.23 | 0.36  | 0.46  | 0.73  | -0.08 | -2.24 | -0.13 | 0.65  |
| Q9GZV7 | Hyaluronan and proteoglycan link protein 2                   | HAPLN2        | -0.10 | 0.10 | -0.44 | -1.03 | 2.09  | -0.18 | -0.30 | -0.07 | -1.27 | 1.28  | 0.05  | -0.13 |
| P10645 | Chromogranin-A                                               | CHGA          | -0.10 | 0.19 | 0.94  | -0.46 | -0.23 | -1.12 | 1.13  | 0.63  | 1.09  | 0.57  | -1.56 | -0.99 |
| O43399 | Tumor protein D54                                            | TPD52L2       | -0.10 | 0.12 | 0.81  | 0.28  | -2.53 | 0.67  | 0.94  | -0.40 | 0.04  | -0.35 | 0.46  | 0.08  |
| Q96B23 | Uncharacterized protein C18orf25                             | C18orf25      | -0.10 | 0.14 | 0.75  | 1.13  | 0.65  | -0.99 | -1.34 | 0.37  | 0.58  | -1.71 | -0.17 | 0.73  |

|        |                                                                        |          |       |      |       |       |       |       |       |       |       |       |       |       |
|--------|------------------------------------------------------------------------|----------|-------|------|-------|-------|-------|-------|-------|-------|-------|-------|-------|-------|
| Q6PJG2 | ELM2 and SANT domain-containing protein 1                              | ELMSAN1  | -0.10 | 0.20 | 2.01  | -0.31 | -0.64 | -0.22 | -0.55 | -0.45 | 1.68  | -0.97 | -0.30 | -0.24 |
| P56559 | ADP-ribosylation factor-like protein 4C                                | ARL4C    | -0.10 | 0.11 | 2.23  | -0.47 | -0.59 | -0.48 | -0.54 | -0.43 | -0.45 | 1.50  | -0.45 | -0.33 |
| O00592 | Podocalyxin                                                            | PODXL    | -0.10 | 0.18 | -0.29 | 2.29  | -0.70 | -0.45 | -0.60 | -0.42 | -0.47 | 1.39  | -0.51 | -0.24 |
| P16298 | Serine/threonine-protein phosphatase 2B catalytic subunit beta isoform | PPP3CB   | -0.10 | 0.27 | -0.63 | 1.38  | 1.01  | 0.22  | -1.61 | -0.24 | -0.14 | 1.39  | -0.51 | -0.88 |
| P50548 | ETS domain-containing transcription factor ERF                         | ERF      | -0.10 | 0.13 | 1.92  | -0.62 | -0.78 | 0.37  | -0.70 | -0.55 | -0.57 | -0.94 | 0.49  | 1.39  |
| Q8NG37 | Synaptodin                                                             | SYNPO    | -0.11 | 0.12 | 0.28  | 0.66  | -0.32 | -0.27 | -0.17 | -1.55 | -0.12 | 2.35  | -0.48 | -0.38 |
| Q5T0F9 | Coiled-coil and C2 domain-containing protein 1B                        | CC2D1B   | -0.11 | 0.17 | 0.80  | -0.22 | -1.66 | 0.56  | 0.75  | 0.43  | 0.26  | -1.97 | 0.39  | 0.65  |
| Q68EM7 | Rho GTPase-activating protein 17                                       | ARHGAP17 | -0.11 | 0.07 | -1.13 | 0.81  | -1.39 | 1.00  | 0.81  | -0.52 | -1.25 | -0.14 | 0.87  | 0.93  |
| Q02878 | 60S ribosomal protein L6                                               | RPL6     | -0.11 | 0.20 | -0.50 | -1.51 | 0.22  | -0.35 | 2.43  | -0.43 | 0.10  | 0.01  | -0.29 | 0.32  |
| Q96GW7 | Brevican core protein                                                  | BCAN     | -0.11 | 0.17 | 0.27  | -1.03 | 0.37  | -0.35 | 0.98  | -0.59 | -0.88 | 2.16  | -0.02 | -0.92 |
| A6NNA2 | Serine/arginine repetitive matrix protein 3                            | SRRM3    | -0.11 | 0.15 | -1.34 | -0.21 | -0.56 | 0.14  | 2.19  | -0.68 | -0.67 | 0.89  | -0.27 | 0.51  |
| Q16775 | Hydroxyacylglutathione hydrolase, mitochondrial                        | HAGH     | -0.11 | 0.15 | -1.18 | 0.35  | 0.40  | 0.85  | -0.21 | -1.64 | -1.19 | 1.22  | 0.67  | 0.73  |
| P24588 | A-kinase anchor protein 5                                              | AKAP5    | -0.11 | 0.31 | -0.49 | 1.87  | -0.77 | -0.32 | 0.14  | 0.32  | -0.13 | -1.56 | -0.41 | 1.35  |
| Q96CT7 | Coiled-coil domain-containing protein 124                              | CCDC124  | -0.11 | 0.16 | 0.18  | 1.70  | 1.02  | -1.02 | -1.65 | 0.40  | 0.05  | -0.82 | -0.41 | 0.53  |
| P62750 | 60S ribosomal protein L23a                                             | RPL23A   | -0.11 | 0.27 | 0.01  | -0.77 | 0.98  | -1.53 | 1.70  | 0.04  | 0.59  | 0.17  | -1.35 | 0.16  |
| Q9UNZ2 | NSFL1 cofactor p47                                                     | NSFL1C   | -0.11 | 0.21 | 1.41  | 0.88  | -0.33 | -1.51 | -0.15 | 0.56  | 0.99  | -1.55 | -0.37 | 0.07  |
| Q8WWM7 | Ataxin-2-like protein                                                  | ATXN2L   | -0.11 | 0.07 | 1.20  | -0.56 | 0.58  | -0.60 | -0.51 | 1.34  | 1.27  | -1.43 | -0.75 | -0.54 |
| P51649 | Succinate-semialdehyde dehydrogenase, mitochondrial                    | ALDH5A1  | -0.11 | 0.15 | 0.89  | -0.53 | 0.49  | -1.04 | 0.41  | 0.48  | -0.69 | 1.90  | -1.33 | -0.58 |
| O94829 | Importin-13                                                            | IPO13    | -0.11 | 1.04 | 1.67  | 0.40  | -0.85 | 0.31  | -0.34 | 0.09  | -0.19 | -2.11 | 0.74  | 0.28  |
| Q9UKB1 | F-box/WD repeat-containing protein 11                                  | FBXW11   | -0.11 | 0.14 | 0.48  | -0.19 | -1.61 | 0.85  | 0.68  | 0.12  | 0.89  | -1.85 | -0.18 | 0.83  |
| O43505 | Beta-1,4-glucuronyltransferase 1                                       | B4GAT1   | -0.11 | 0.09 | 0.41  | 0.63  | -1.06 | -0.89 | 1.03  | -0.83 | 1.18  | 1.32  | -0.94 | -0.87 |
| P06239 | Tyrosine-protein kinase Lck                                            | LCK      | -0.11 | 0.80 | 1.01  | 0.49  | -1.25 | 0.53  | 0.19  | 0.39  | 0.47  | -2.22 | -0.30 | 0.69  |
| Q55007 | Leucine-rich repeat serine/threonine-protein kinase 2                  | LRRK2    | -0.11 | 0.29 | -0.08 | -0.39 | -0.77 | 1.87  | -0.22 | -0.40 | -0.18 | -1.20 | 1.72  | -0.34 |
| Q96597 | Myeloid-associated differentiation marker                              | MYADM    | -0.11 | 0.35 | -1.67 | 1.10  | 0.13  | 0.94  | -0.03 | -1.88 | 0.11  | 0.53  | 0.36  | 0.42  |
| Q99570 | Phosphoinositide 3-kinase regulatory subunit 4                         | PIK3R4   | -0.11 | 0.09 | 0.82  | -0.11 | -0.71 | 0.14  | -0.01 | 0.96  | 1.07  | -2.39 | 0.14  | 0.07  |
| O94806 | Serine/threonine-protein kinase D3                                     | PRKD3    | -0.11 | 0.36 | 0.17  | -0.23 | 1.27  | -0.12 | -0.60 | 2.08  | -0.29 | -1.49 | -0.35 | -0.44 |
| O43396 | Thioredoxin-like protein 1                                             | TXNL1    | -0.11 | 0.36 | -1.18 | 1.65  | 0.25  | 0.18  | -0.41 | -1.44 | -0.67 | -0.31 | 1.19  | 0.75  |
| Q13630 | GDP-L-fucose synthase                                                  | TSTA3    | -0.11 | 0.22 | 1.50  | 0.08  | 0.15  | -0.48 | -0.94 | -0.04 | 1.95  | -0.93 | -0.45 | -0.84 |
| Q01968 | Inositol polyphosphate 5-phosphatase OCRL                              | OCRL     | -0.11 | 0.23 | 0.65  | 1.61  | -1.89 | 0.62  | -0.66 | 0.00  | 0.14  | -1.15 | 0.45  | 0.23  |
| Q86VV4 | Ran-binding protein 3-like                                             | RANBP3L  | -0.11 | 1.18 | 0.82  | 0.39  | -0.80 | 0.47  | 0.45  | 0.75  | -0.34 | -2.43 | -0.02 | 0.71  |
| Q9UNK9 | Protein angel homolog 1                                                | ANGEL1   | -0.11 | 0.18 | 1.96  | -0.34 | -0.71 | -0.25 | -0.40 | 1.74  | -0.33 | -0.97 | -0.42 | -0.27 |
| Q14344 | Guanine nucleotide-binding protein subunit alpha-13                    | GNA13    | -0.11 | 0.11 | -1.64 | -0.76 | 1.47  | 0.29  | 0.80  | 0.07  | -1.41 | 0.76  | 0.50  | -0.08 |
| P07919 | Cytochrome b-c1 complex subunit 6, mitochondrial                       | UQCRRH   | -0.12 | 1.02 | 1.52  | 0.07  | -0.63 | -0.09 | 0.31  | 0.21  | 0.64  | -2.35 | 0.45  | -0.14 |
| Q04917 | 14-3-3 protein eta                                                     | YWHAH    | -0.12 | 0.23 | 0.69  | 0.51  | -0.07 | -0.23 | -0.57 | 0.06  | 1.18  | -2.37 | -0.10 | 0.91  |
| Q9H3M7 | Thioredoxin-interacting protein                                        | TXNIP    | -0.12 | 0.23 | 0.42  | 0.13  | -0.87 | -0.03 | 0.68  | 1.61  | 0.99  | -1.50 | -0.10 | -1.33 |
| P14927 | Cytochrome b-c1 complex subunit 7                                      | UQCRRB   | -0.12 | 1.24 | 1.47  | 0.37  | -1.20 | 0.60  | 0.12  | -0.19 | 0.54  | -1.96 | -0.47 | 0.72  |
| Q81WZ3 | Ankyrin repeat and KH domain-containing protein 1                      | ANKHD1   | -0.12 | 0.16 | 1.49  | -1.34 | -1.17 | 0.42  | 0.84  | 0.76  | 0.73  | -0.75 | -1.04 | 0.06  |
| Q8NCM8 | Cytoplasmic dynein 2 heavy chain 1                                     | DYNC2H1  | -0.12 | 0.16 | 0.46  | -1.08 | -1.33 | 1.11  | 1.08  | 0.73  | -0.08 | -1.57 | 0.02  | 0.67  |
| P41091 | Eukaryotic translation initiation factor 2 subunit 3                   | EIF2S3   | -0.12 | 0.42 | -0.11 | -1.00 | -0.18 | 2.02  | -0.16 | -0.77 | 0.55  | -1.36 | 1.06  | -0.03 |
| Q8TBK6 | Zinc finger CCHC domain-containing protein 10                          | ZCCHC10  | -0.12 | 1.40 | 2.27  | -0.37 | -0.43 | 0.33  | -0.31 | -0.01 | -0.21 | -1.77 | 0.10  | 0.39  |
| Q9HA23 | mRNA (2'-O-methyladenosine-N(6)-)-methyltransferase                    | PCIF1    | -0.12 | 0.20 | 0.07  | -0.91 | 0.50  | 0.43  | 0.18  | -0.84 | -2.05 | 0.49  | 0.67  | 1.45  |
| O00170 | AH receptor-interacting protein                                        | AIP      | -0.12 | 0.16 | 0.60  | 0.22  | -1.34 | 1.09  | -0.33 | 0.10  | -0.13 | -1.80 | 0.11  | 1.49  |
| O95197 | Reticulon-3                                                            | RTN3     | -0.12 | 0.20 | 0.22  | -0.85 | -1.09 | 0.99  | 1.02  | 1.57  | -1.37 | -0.25 | 0.43  | -0.66 |
| Q9BT88 | Synaptotagmin-11                                                       | SYT11    | -0.12 | 0.19 | 0.23  | 1.64  | 0.46  | -0.07 | -1.98 | -0.29 | 0.79  | -0.98 | 0.56  | -0.36 |
| Q9UKK9 | ADP-sugar pyrophosphatase                                              | NUDT5    | -0.12 | 0.09 | -0.48 | -0.13 | 0.66  | -0.54 | 0.63  | -0.64 | -0.66 | 2.45  | -0.66 | -0.63 |
| Q02252 | Methylmalonate-semialdehyde dehydrogenase [acylating], mitochondrial   | ALDH5A1  | -0.12 | 0.23 | 1.56  | -1.68 | 0.89  | -0.57 | 0.12  | 0.23  | 0.97  | -1.27 | -0.17 | -0.09 |
| Q8N8K9 | Uncharacterized protein KIAA1958                                       | KIAA1958 | -0.12 | 1.16 | 1.14  | 0.87  | -0.34 | 0.10  | -0.47 | 0.18  | 0.15  | -2.47 | 0.60  | 0.24  |
| P07327 | Alcohol dehydrogenase 1A                                               | ADH1A    | -0.12 | 0.12 | -0.37 | -0.44 | 1.92  | -0.37 | -0.57 | -0.53 | -0.45 | 1.86  | -0.56 | -0.51 |
| P62318 | Small nuclear ribonucleoprotein Sm D3                                  | SNRPD3   | -0.12 | 0.26 | 0.65  | -1.68 | 1.03  | -0.61 | 0.97  | -1.07 | -0.81 | 0.47  | -0.12 | 1.17  |
| O00410 | Importin-5                                                             | IPO5     | -0.12 | 0.24 | -1.35 | 0.31  | -0.25 | 0.62  | 1.01  | -1.78 | -0.12 | 1.54  | 0.19  | -0.17 |
| Q9GZU2 | Paternally-expressed gene 3 protein                                    | PEG3     | -0.12 | 0.94 | 1.66  | 0.60  | -1.02 | 0.15  | -0.29 | 0.25  | 0.05  | -2.07 | 0.06  | 0.61  |
| P62269 | 40S ribosomal protein S18                                              | RPS18    | -0.12 | 0.26 | -0.67 | -1.33 | 1.60  | 0.15  | 0.61  | -1.33 | -0.49 | 1.28  | 0.39  | -0.21 |
| A6NFI3 | Zinc finger protein 316                                                | ZNF316   | -0.12 | 0.14 | 0.76  | -0.95 | -1.13 | 0.80  | 0.73  | 1.17  | 0.95  | -1.40 | -0.01 | -0.93 |
| P15170 | Eukaryotic peptide chain release factor GTP-binding subunit ERF3       | GSPT1    | -0.12 | 0.20 | -1.18 | -0.16 | 0.60  | -0.23 | 1.26  | -1.30 | -0.49 | 1.89  | -0.23 | -0.15 |
| Q8TF21 | Ankyrin repeat domain-containing protein 24                            | ANKRD24  | -0.12 | 0.08 | 1.62  | 0.01  | -1.53 | 0.16  | -0.15 | 1.62  | -0.89 | -0.74 | 0.00  | -0.10 |
| P22061 | Protein-L-isoaspartate(D-aspartate) O-methyltransferase                | PCMT1    | -0.12 | 0.41 | -0.59 | 1.94  | 0.44  | -0.13 | -1.13 | -1.06 | 1.29  | -0.18 | -0.75 | 0.15  |
| O14975 | Very long-chain acyl-CoA synthetase                                    | SLC27A2  | -0.12 | 0.22 | -0.10 | 0.71  | -0.80 | -0.38 | 0.88  | -0.48 | -0.57 | -1.12 | -0.36 | 2.23  |
| O75390 | Citrate synthase, mitochondrial                                        | CS       | -0.12 | 0.14 | -1.02 | -0.19 | 0.56  | 0.36  | 0.50  | -1.22 | -1.42 | 1.88  | 0.44  | 0.12  |
| Q92734 | Protein TFG                                                            | TFG      | -0.12 | 0.12 | 0.38  | -0.73 | -0.12 | -0.28 | 0.91  | 0.47  | -2.38 | 0.94  | 0.01  | 0.79  |
| P40227 | T-complex protein 1 subunit zeta                                       | CCT6A    | -0.12 | 0.39 | -1.34 | 1.82  | -0.12 | 0.60  | -0.43 | -0.49 | 1.12  | -1.20 | 0.48  | -0.44 |
| P43490 | Nicotinamide phosphoribosyltransferase                                 | NAMPT    | -0.12 | 0.37 | 1.09  | 0.71  | -1.33 | 0.03  | -0.01 | 1.15  | -0.05 | -2.02 | 0.30  | 0.12  |
| P51553 | Isocitrate dehydrogenase [NAD] subunit gamma, mitochondrial            | IDH3G    | -0.12 | 0.11 | -1.63 | -0.16 | 1.16  | 0.53  | 0.25  | -1.71 | 0.94  | -0.46 | 0.56  | 0.53  |
| Q6P1N0 | Coiled-coil and C2 domain-containing protein 1A                        | CC2D1A   | -0.12 | 0.11 | -0.34 | -0.54 | -1.34 | -0.04 | 2.43  | 0.37  | -0.36 | 0.59  | -0.47 | -0.29 |
| P53805 | Calcipressin-1                                                         | RCAN1    | -0.12 | 0.13 | -0.36 | 1.25  | 0.20  | -0.02 | -0.88 | 1.08  | -2.06 | -0.34 | 0.17  | 0.96  |
| Q9NZN3 | BH domain-containing protein 3                                         | BHD3     | -0.12 | 0.25 | -1.18 | 2.01  | -0.85 | 0.07  | 0.30  | 0.75  | 0.55  | -1.36 | -0.11 | -0.18 |
| Q86YR5 | G-protein-signaling modulator 1                                        | GPSM1    | -0.12 | 0.12 | 0.84  | -0.32 | -0.50 | 0.47  | -0.30 | -1.67 | -0.13 | 2.03  | 0.36  | -0.78 |
| Q9HCE0 | Ectopic P granules protein 5 homolog                                   | EPG5     | -0.12 | 0.16 | 1.44  | -0.59 | -1.01 | 1.05  | -0.66 | 1.45  | -0.60 | -1.00 | -0.58 | 0.50  |
| Q99592 | Zinc finger and BTB domain-containing protein 18                       | ZBTB18   | -0.13 | 0.96 | 1.40  | 0.54  | -1.10 | 0.44  | -0.17 | 0.04  | -0.04 | -2.18 | 0.41  | 0.64  |
| P51797 | Chloride transport protein 6                                           | CLCN6    | -0.13 | 0.14 | 1.09  | 0.44  | 0.28  | -0.57 | -1.04 | 1.43  | 0.56  | -1.40 | -1.26 | 0.47  |
| Q9UKV0 | Histone deacetylase 9                                                  | HDA9     | -0.13 | 0.27 | -0.16 | -0.41 | -0.77 | 2.01  | -0.30 | -0.22 | -0.42 | -1.07 | 1.62  | -0.28 |
| P54764 | Ephrin type-A receptor 4                                               | EPHA4    | -0.13 | 0.27 | -0.43 | 1.68  | -1.15 | 0.94  | -0.67 | -0.29 | 0.45  | -1.47 | 0.00  | 0.95  |
| Q92696 | Geranylgeranyl transferase type-2 subunit alpha                        | RABGGTA  | -0.13 | 0.18 | -1.23 | -0.50 | 1.86  | 0.82  | -0.69 | -1.03 | -0.63 | -0.09 | 0.90  | 0.59  |
| Q9H0Q0 | Protein FAM49A                                                         | FAM49A   | -0.13 | 0.25 | -0.29 | 1.17  | -0.09 | 0.19  | -0.63 | 0.53  | 0.59  | -2.45 | 0.58  | 0.39  |
| Q99729 | Heterogeneous nuclear ribonucleoprotein A/B                            | HNRNPAB  | -0.13 | 0.61 | 1.95  | 0.03  | -1.72 | 0.26  | 0.26  | -0.60 | -1.08 | -0.10 | 0.34  | 0.67  |
| Q9U1J7 | GTP-AMP phosphotransferase AK3, mitochondrial                          | AK3      | -0.13 | 0.15 | -0.98 | -0.33 | 1.00  | 0.08  | 0.45  | -1.92 | -0.89 | 0.72  | 0.91  | 0.95  |
| P42694 | Probable helicase with zinc finger domain                              | HELZ     | -0.13 | 0.11 | 1.67  | -0.68 | -0.77 | -0.65 | 0.61  | 1.48  | 0.61  | -1.00 | -0.65 | -0.61 |
| Q07020 | 60S ribosomal protein L18                                              | RPL18    | -0.13 | 0.10 | -0.89 | -1.47 | 0.42  | 0.27  | 1.81  | -0.88 | -0.62 | 1.05  | 0.47  | -0.17 |
| O75182 | Paired amphipathic helix protein Sin3b                                 | SIN3B    | -0.13 | 0.21 | 2.07  | -0.27 | -0.73 | -0.38 | -0.38 | 1.63  | -0.35 | -0.91 | -0.27 | -0.40 |
| Q8N4Q0 | Prostaglandin reductase 3                                              | ZADH2    | -0.13 | 0.12 | -1.67 | 0.37  | 1.26  | 0.36  | -0.15 | -1.71 | -0.13 | -0.16 | 1.06  | 0.50  |
| P49257 | Protein ERGIC-53                                                       | LMAN1    | -0.13 | 0.13 | -0.06 | -0.95 | 1.11  | 0.18  | -0.09 | 0.77  | 0.01  | -2.30 | 0.83  | 0.49  |
| P61604 | 10 kDa heat shock protein, mitochondrial                               | HSP61    | -0.13 | 0.27 | -1.86 | 0.70  | 0.14  | -0.04 | 1.44  | -1.59 | 0.45  | 0.35  | 0.15  | 0.27  |
| Q12931 | Heat shock protein 75 kDa, mitochondrial                               | TRAP1    | -0.13 | 0.22 | -0.89 | -0.55 | 1.97  | 0.17  | -0.40 | -1.03 | 0.45  | -1.15 | 0.37  | 1.04  |
| P43487 | Ran-specific GTPase-activating protein                                 | RANBP1   | -0.13 | 0.28 | 0.41  | 1.40  | -1.44 | 0.32  | -0.31 | 0.70  | 0.25  | -1.95 | 0.15  | 0.46  |



|        |                                                                   |         |       |      |       |       |       |       |       |       |       |       |       |       |
|--------|-------------------------------------------------------------------|---------|-------|------|-------|-------|-------|-------|-------|-------|-------|-------|-------|-------|
| P26640 | Valine--tRNA ligase                                               | VARS    | -0.13 | 0.30 | 0.55  | -2.04 | 2.07  | -0.17 | 0.02  | 0.25  | -0.31 | -0.16 | -0.15 | -0.05 |
| P18507 | Gamma-aminobutyric acid receptor subunit gamma-2                  | GABRG2  | -0.13 | 0.34 | 0.92  | -2.28 | 0.83  | 0.05  | 0.95  | 0.55  | -0.85 | 0.20  | 0.15  | -0.51 |
| Q01082 | Spectrin beta chain, non-erythrocytic 1                           | SPTBN1  | -0.13 | 0.27 | -0.19 | 1.40  | 0.35  | -0.87 | -0.31 | -0.13 | 1.72  | -1.35 | -1.03 | 0.41  |
| P00558 | Phosphoglycerate kinase 1                                         | PGK1    | -0.13 | 0.27 | -0.29 | 1.04  | 0.26  | 0.25  | -0.88 | 0.12  | -2.35 | 1.00  | 0.55  | 0.30  |
| Q01167 | Forkhead box protein K2                                           | FOXXK2  | -0.13 | 0.17 | -0.86 | -0.36 | 0.02  | 1.13  | 0.32  | -1.04 | -0.94 | 2.16  | -0.08 | -0.34 |
| Q9NR56 | Muscleblind-like protein 1                                        | MBNL1   | -0.13 | 0.13 | 1.21  | -1.11 | -1.63 | 0.93  | 0.78  | 0.40  | 0.02  | -1.19 | 0.75  | -0.16 |
| P26373 | 60S ribosomal protein L13                                         | RPL13   | -0.13 | 0.42 | -0.54 | -1.67 | 0.37  | 1.49  | 0.91  | -0.98 | -0.42 | -0.62 | 0.99  | 0.48  |
| Q8NC96 | Adaptin ear-binding coat-associated protein 1                     | NECAP1  | -0.13 | 0.32 | 0.47  | 2.06  | -1.74 | -0.36 | 0.01  | -0.55 | 0.90  | -0.38 | -0.09 | -0.32 |
| Q8BWJ2 | NuDC domain-containing protein 2                                  | NUDCD2  | -0.13 | 0.25 | -0.01 | 0.85  | -1.78 | 0.20  | 1.08  | 0.90  | -0.98 | -1.24 | 0.26  | 0.71  |
| Q96FW1 | Ubiquitin thioesterase OTUB1                                      | OTUB1   | -0.14 | 0.26 | 0.48  | 0.78  | -0.65 | 0.69  | -0.94 | 0.54  | 0.98  | -2.05 | -0.58 | 0.75  |
| Q7L0J3 | Synaptic vesicle glycoprotein 2A                                  | SV2A    | -0.14 | 0.28 | -0.48 | 0.23  | -0.94 | 1.52  | 0.06  | -0.91 | -0.24 | -1.34 | 1.60  | 0.52  |
| P46531 | Neurogenic locus notch homolog protein 1                          | NOTCH1  | -0.14 | 0.15 | 0.53  | -1.76 | 1.09  | 0.74  | -0.38 | 0.43  | -1.72 | 0.20  | 0.74  | 0.15  |
| Q6H8Q1 | Actin-binding LIM protein 2                                       | ABLIM2  | -0.14 | 0.37 | 0.23  | 1.17  | -1.02 | 0.52  | -0.40 | 0.48  | 0.33  | -2.29 | 0.30  | 0.67  |
| Q14894 | Ketimine reductase mu-crystallin                                  | CRYM    | -0.14 | 0.46 | -0.11 | -0.27 | 0.68  | 0.52  | -0.21 | -2.37 | 0.86  | 0.71  | 0.88  | -0.70 |
| Q02224 | Centromere-associated protein E                                   | CENPE   | -0.14 | 0.25 | -0.03 | 0.10  | -2.10 | 0.91  | 1.46  | 0.70  | -0.54 | -0.79 | 0.43  | -0.14 |
| Q9UPA5 | Protein bassoon                                                   | BSN     | -0.14 | 0.19 | 0.04  | -1.06 | -0.44 | -0.55 | 2.27  | 0.52  | 0.93  | -0.33 | -0.79 | -0.59 |
| Q8IXJ6 | NAD-dependent protein deacetylase sirutin-2                       | SIRT2   | -0.14 | 0.28 | -0.49 | -0.14 | 0.67  | 0.41  | -0.07 | -1.55 | -0.79 | 1.91  | 0.86  | -0.82 |
| Q8TAQ2 | SWI/SNF complex subunit SMARCC2                                   | SMARCC2 | -0.14 | 0.18 | 0.17  | -2.18 | 1.98  | 0.06  | 0.24  | -0.04 | -0.12 | -0.29 | 0.32  | -0.14 |
| Q9NV07 | Alpha-parvin                                                      | PARVA   | -0.14 | 0.21 | -0.35 | -1.16 | -0.27 | -0.46 | 2.54  | 0.50  | -0.22 | -0.46 | -0.42 | 0.31  |
| O95202 | Mitochondrial prototy/calcium exchanger protein                   | LETM1   | -0.14 | 1.27 | 1.71  | 0.72  | -1.13 | -0.17 | 0.24  | -0.11 | 0.55  | -1.92 | -0.25 | 0.35  |
| Q13418 | Integrin-linked protein kinase                                    | ILK     | -0.14 | 0.11 | 0.20  | 0.75  | -0.94 | 0.65  | -0.50 | 0.99  | -2.13 | -0.47 | 0.53  | 0.92  |
| P27105 | Erythrocyte band 7 integral membrane protein                      | STOM    | -0.14 | 0.12 | -1.27 | 0.43  | 0.09  | 0.74  | 0.17  | -1.40 | -1.28 | 1.53  | 0.82  | 0.16  |
| Q8WYV3 | Cysteine/serine-rich nuclear protein 3                            | CSRNP3  | -0.14 | 0.17 | -0.27 | -0.51 | -0.69 | -0.37 | 2.08  | -0.51 | -0.54 | 1.68  | -0.44 | -0.43 |
| Q15413 | Ryanodine receptor 3                                              | RYR3    | -0.14 | 0.30 | -0.84 | -0.18 | 0.33  | 0.80  | 0.29  | -0.83 | -2.11 | 0.80  | 0.62  | 1.12  |
| Q9AE44 | Far upstream element-binding protein 1                            | FUBP1   | -0.14 | 0.44 | 1.59  | -0.88 | -1.20 | 0.35  | 0.73  | -1.31 | -0.40 | -0.55 | 0.70  | 0.97  |
| O75475 | PC4 and SFRS1-interacting protein                                 | PSIP1   | -0.14 | 0.26 | 1.67  | -0.69 | 0.59  | -0.36 | -0.85 | 0.66  | 0.98  | -1.74 | -0.28 | 0.02  |
| P08047 | Transcription factor Sp1                                          | SP1     | -0.14 | 0.19 | -0.32 | -0.41 | -0.66 | -0.37 | 2.02  | -0.37 | -0.42 | -0.76 | 1.73  | -0.44 |
| Q16630 | Cleavage and polyadenylation specificity factor subunit 6         | CPSF6   | -0.14 | 0.16 | -0.52 | -0.01 | 0.82  | 0.94  | -1.01 | -2.10 | -0.21 | 0.41  | 1.09  | 0.58  |
| P21579 | Synaptotagmin-1                                                   | SYT1    | -0.14 | 0.28 | 0.58  | 0.73  | -0.02 | -0.93 | 0.02  | -0.98 | 2.20  | -0.85 | -0.85 | 0.10  |
| O94804 | Serine/threonine-protein kinase 10                                | STK10   | -0.14 | 0.55 | -1.20 | -0.29 | 0.79  | 0.76  | 0.63  | -1.69 | 0.00  | 1.30  | 0.64  | -0.96 |
| Q8TB36 | Ganglioside-induced differentiation-associated protein 1          | GDAP1   | -0.14 | 0.38 | 0.51  | 0.77  | 0.33  | -0.93 | -0.16 | 0.06  | 1.86  | -1.84 | -0.53 | -0.06 |
| Q8N987 | N-terminal EF-hand calcium-binding protein 1                      | NECAB1  | -0.14 | 0.16 | 0.25  | -0.10 | -0.86 | -0.60 | 1.54  | -0.40 | 1.19  | -1.85 | 0.20  | 0.64  |
| Q96L34 | MAP/microtubule affinity-regulating kinase 4                      | MARK4   | -0.14 | 0.13 | -0.26 | 0.57  | -0.25 | 0.32  | -0.20 | 1.10  | 1.37  | -2.23 | 0.13  | -0.57 |
| Q9UH03 | Neuronal-specific septin-3                                        | SEPTIN3 | -0.14 | 0.52 | 0.07  | 1.46  | -0.24 | 0.27  | -0.88 | 0.17  | 1.70  | -1.51 | -0.17 | -0.86 |
| Q6LE66 | Serine/threonine-protein phosphatase 2A 55 kDa regulatory subunit | PPP2R2D | -0.14 | 0.29 | 0.82  | 0.44  | -1.44 | -0.25 | 0.84  | 1.23  | -1.86 | -0.33 | 0.09  | 0.47  |
| P05165 | Propionyl-CoA carboxylase alpha chain, mitochondrial              | PCCA    | -0.14 | 0.12 | -1.09 | -1.18 | 0.39  | 0.25  | 1.80  | -1.08 | -0.54 | 1.10  | 0.53  | -0.19 |
| Q13620 | Cullin-4B                                                         | CUL4B   | -0.14 | 0.99 | 1.62  | 0.06  | 1.19  | -0.25 | -1.48 | -1.27 | 0.06  | 0.87  | -0.44 | -0.37 |
| Q9UDW1 | Cytochrome b-c1 complex subunit 9                                 | UQCRC10 | -0.14 | 1.43 | 1.67  | 0.66  | -1.08 | 0.47  | -0.21 | 0.13  | 0.08  | -2.05 | 0.34  | -0.01 |
| Q9UQ90 | Paraplegin                                                        | SPG7    | -0.14 | 0.21 | -0.28 | -0.40 | 1.81  | -0.37 | -0.47 | 1.94  | -0.55 | -0.84 | -0.43 | -0.41 |
| O9Y352 | Ubiquitin-like modifier-activating enzyme ATG7                    | ATG7    | -0.14 | 0.52 | 1.06  | -1.51 | 1.12  | -0.22 | 0.21  | -0.55 | -0.88 | 1.57  | -0.83 | 0.01  |
| Q9Y6M9 | NADH dehydrogenase [ubiquinone] 1 beta subcomplex subunit 9       | NDUFB9  | -0.14 | 1.76 | 1.88  | -0.22 | -0.94 | 0.87  | 0.15  | 0.04  | 0.43  | -1.85 | -0.38 | 0.00  |
| Q13765 | Nascent polypeptide-associated complex subunit alpha              | NACA    | -0.14 | 0.36 | 0.72  | 0.39  | 0.63  | -0.72 | -0.54 | -0.68 | 0.14  | -1.33 | -0.72 | 2.09  |
| Q6ZN08 | Putative zinc finger protein 66                                   | ZNF66   | -0.14 | 0.29 | 0.98  | -1.49 | -1.28 | 1.12  | 1.06  | 0.46  | -0.88 | -0.26 | 0.74  | -0.45 |
| P36404 | ADP-ribosylation factor-like protein 2                            | ARL2    | -0.15 | 0.46 | 0.46  | 0.00  | 0.51  | 0.52  | -0.87 | 0.11  | -0.52 | -2.25 | 0.87  | 1.18  |
| Q96KQ7 | Histone-lysine N-methyltransferase EHMT2                          | EHMT2   | -0.15 | 0.18 | 0.78  | 0.32  | -2.49 | 0.65  | 0.99  | -0.14 | -0.33 | -0.50 | 0.19  | 0.52  |
| Q5T457 | E3 ubiquitin-protein ligase UBR4                                  | UBR4    | -0.15 | 0.36 | -0.24 | -0.74 | 0.54  | -0.20 | 1.13  | -1.65 | -0.74 | 1.88  | -0.05 | 0.07  |
| Q8NCJ5 | SPRY domain-containing protein 3                                  | SPRYD3  | -0.15 | 0.15 | -1.17 | 0.71  | -0.12 | 0.79  | 0.01  | 1.37  | 0.86  | -1.57 | 0.27  | -1.15 |
| Q9C0I1 | Myotubularin-related protein 12                                   | MTMR12  | -0.15 | 0.33 | -0.86 | -0.74 | 0.96  | -0.74 | 1.82  | -0.25 | -1.28 | 1.05  | -0.26 | 0.30  |
| P61927 | 60S ribosomal protein L37                                         | RPL37   | -0.15 | 0.17 | -0.03 | -1.32 | -0.59 | -0.12 | 2.29  | -0.28 | 0.80  | -0.36 | -0.80 | 0.40  |
| O60299 | Leucine zipper putative tumor suppressor 3                        | LZTS3   | -0.15 | 0.36 | 1.32  | 0.65  | -1.02 | -0.71 | 0.24  | -0.46 | 1.47  | -1.54 | 0.52  | -0.47 |
| O75914 | Serine/threonine-protein kinase PAK 3                             | PAK3    | -0.15 | 0.45 | 1.62  | 1.26  | 0.27  | -1.41 | -1.13 | -0.42 | -0.15 | 0.22  | -0.90 | 0.65  |
| P49589 | Cysteine--tRNA ligase, cytoplasmic                                | CARS    | -0.15 | 0.36 | 1.21  | -0.99 | -0.60 | -0.52 | 1.38  | 1.00  | -1.33 | -0.22 | 0.81  | -0.74 |
| Q93009 | Ubiquitin carboxyl-terminal hydrolase 7                           | USP7    | -0.15 | 0.46 | -1.36 | -0.03 | -0.47 | 0.10  | 2.37  | 0.62  | -0.90 | 0.07  | -0.23 | -0.16 |
| P19838 | Nuclear factor NF-kappa-B p105 subunit                            | NFKB1   | -0.15 | 0.17 | -0.79 | -0.38 | -0.76 | 0.90  | 1.26  | -0.68 | -1.69 | 0.55  | 1.22  | 0.35  |
| Q9NWW4 | Histone PARylation factor 1                                       | HPF1    | -0.15 | 0.28 | 2.12  | -0.38 | -0.77 | -0.19 | -0.40 | 1.53  | -0.33 | -0.96 | -0.32 | -0.30 |
| O95071 | E3 ubiquitin-protein ligase UBR5                                  | UBR5    | -0.15 | 0.18 | 0.66  | -0.14 | -0.13 | 0.03  | -0.15 | -2.24 | 0.72  | 1.53  | 0.41  | -0.68 |
| Q16576 | Histone-binding protein RBBP7                                     | RBBP7   | -0.15 | 0.38 | -1.25 | -0.12 | 0.50  | 0.43  | 0.95  | -0.74 | -1.93 | 0.36  | 0.74  | 1.06  |
| Q9NQ29 | Putative RNA-binding protein Luc7-like 1                          | LUC7L   | -0.15 | 0.18 | 0.82  | -0.61 | -1.51 | 0.08  | 1.47  | 0.49  | -1.29 | -0.57 | -0.01 | 1.12  |
| P62873 | Guanine nucleotide-binding protein G(I)/G(S)/G(T) subunit beta-1  | GNB1    | -0.15 | 0.49 | -0.35 | 2.28  | -1.39 | 0.66  | -0.54 | -0.44 | -0.15 | -0.74 | 0.47  | 0.21  |
| Q8N138 | ORM1-like protein 3                                               | ORMDL3  | -0.15 | 0.19 | 1.28  | 1.25  | -0.96 | -0.54 | -0.76 | 1.31  | -0.57 | -1.03 | -0.67 | 0.70  |
| Q6IAA8 | Regulator complex protein LAMTOR1                                 | LAMTOR1 | -0.15 | 0.20 | -0.25 | 1.93  | -0.62 | -0.31 | -0.47 | -0.37 | -0.47 | -0.81 | -0.45 | 1.81  |
| P38159 | RNA-binding motif protein, X chromosome                           | RBMX    | -0.15 | 0.40 | 1.49  | -0.57 | -1.07 | 0.59  | 0.10  | -1.35 | 1.25  | -1.14 | 0.24  | 0.46  |
| O95630 | STAM-binding protein                                              | STAMPB  | -0.15 | 0.23 | -0.34 | 0.01  | -0.65 | -0.44 | 1.74  | 0.74  | -1.91 | 0.97  | -0.31 | 0.19  |
| Q15654 | Thyroid receptor-interacting protein 6                            | TRIP6   | -0.15 | 0.20 | -0.18 | -0.38 | -0.99 | 0.94  | 0.89  | 0.65  | -0.67 | -1.96 | 0.85  | 0.85  |
| Q9Y4C8 | Probable RNA-binding protein 19                                   | RBM19   | -0.15 | 0.22 | -0.31 | 1.20  | -0.89 | 0.93  | -0.63 | -0.56 | -0.65 | 2.01  | -0.52 | -0.59 |
| P02549 | Spectrin alpha chain, erythrocytic 1                              | SPTA1   | -0.15 | 0.40 | 1.87  | -0.60 | -0.08 | -1.25 | 0.60  | -1.27 | 0.64  | 0.75  | -0.79 | 0.13  |
| P55160 | Nck-associated protein 1-like                                     | NCKAP1L | -0.15 | 0.30 | 1.12  | -0.63 | -0.88 | 1.68  | -0.87 | -0.54 | -0.69 | 1.26  | -0.74 | 0.29  |
| Q8NEN9 | PDZ domain-containing protein 8                                   | PDZD8   | -0.15 | 0.16 | 1.23  | 0.61  | -1.72 | 0.45  | -0.33 | 0.73  | -1.45 | 0.97  | 0.04  | -0.52 |
| O60784 | Target of Myb protein 1                                           | TOM1    | -0.15 | 0.28 | -0.45 | 1.56  | -0.28 | -0.42 | -0.03 | -0.02 | 1.82  | -1.34 | -0.98 | 0.12  |
| P43686 | 26S proteasome regulatory subunit 6B                              | PSMC4   | -0.16 | 0.56 | 1.89  | 0.07  | -0.42 | -0.23 | -0.60 | 0.88  | 1.13  | -0.44 | -1.14 | -1.14 |
| Q04726 | Transducin-like enhancer protein 3                                | TLE3    | -0.16 | 0.20 | 0.79  | 0.27  | -2.26 | 0.57  | 0.92  | -0.05 | 0.12  | -1.13 | 0.86  | -0.09 |
| P53992 | Protein transport protein Sec24C                                  | SEC24C  | -0.16 | 0.53 | -0.04 | 1.66  | -0.50 | 0.45  | -0.88 | -0.59 | -0.69 | -1.14 | 0.04  | 1.70  |
| Q8N6W0 | CUGBP Elav-like family member 5                                   | CELF5   | -0.16 | 0.29 | 0.21  | -1.29 | -0.17 | 0.86  | 0.79  | -0.66 | -0.39 | 1.60  | 0.59  | -1.55 |
| P98171 | Rho GTPase-activating protein 4                                   | ARHGAP4 | -0.16 | 0.12 | -0.65 | 0.64  | -1.10 | -0.60 | 1.89  | 0.98  | 0.06  | -1.10 | -0.70 | 0.59  |
| Q96D09 | G-protein coupled receptor-associated sorting protein 2           | GRASP2  | -0.16 | 0.16 | 1.41  | -0.99 | -1.16 | 0.33  | 0.64  | 0.18  | 1.61  | -0.62 | -0.39 | -1.01 |
| Q86WW8 | Cytochrome c oxidase assembly factor 5                            | COA5    | -0.16 | 1.43 | 1.65  | 0.58  | -1.01 | 0.39  | -0.10 | 0.30  | -0.07 | -2.12 | -0.04 | 0.42  |
| P61769 | Beta-2-microglobulin                                              | B2M     | -0.16 | 0.33 | 0.97  | 0.03  | -2.02 | 0.01  | 1.46  | 0.35  | -0.77 | -0.80 | 0.70  | 0.06  |
| P09622 | Dihydropyridol dehydrogenase, mitochondrial                       | DLD     | -0.16 | 0.35 | 1.24  | -1.04 | 1.27  | -0.46 | -0.54 | 1.42  | -1.19 | 0.44  | -0.51 | -0.63 |
| O75787 | Renin receptor                                                    | ATP6AP2 | -0.16 | 0.20 | -1.00 | 0.36  | -0.09 | -0.58 | 1.60  | 0.61  | -1.46 | 1.36  | -0.02 | -0.78 |
| P98174 | FYVE, RhoGEF and PH domain-containing protein 1                   | FGD1    | -0.16 | 0.18 | -0.46 | 1.13  | -0.82 | 1.26  | -0.85 | -0.69 | 1.03  | -1.02 | 1.18  | -0.75 |
| P29972 | Aquaporin-1                                                       | AQP1    | -0.16 | 0.25 | 0.07  | 0.04  | 1.98  | -0.66 | -1.09 | 0.73  | -1.57 | 0.29  | 0.53  | -0.33 |
| Q8N414 | PiggyBac transposable element-derived protein 5                   | PGBD5   | -0.16 | 0.87 | 0.68  | 1.17  | -1.93 | 0.56  | 0.55  | -0.86 | 0.79  | 0.53  | -0.93 | -0.57 |
| Q13875 | Myelin-associated oligodendrocyte basic protein                   | MOBP    | -0.16 | 0.29 | -0.79 | 0.11  | 1.67  | 0.26  | -0.85 | -1.82 | 0.29  | 1.05  | 0.42  | -0.34 |

|        |                                                                   |           |       |      |       |       |       |       |       |       |       |       |       |       |
|--------|-------------------------------------------------------------------|-----------|-------|------|-------|-------|-------|-------|-------|-------|-------|-------|-------|-------|
| Q08170 | Serine/arginine-rich splicing factor 4                            | SRSF4     | -0.16 | 0.42 | 0.38  | 0.15  | -0.39 | -0.90 | 1.30  | 0.80  | 1.59  | -1.23 | -0.97 | -0.74 |
| Q7L775 | EPH2A-interacting protein 1                                       | EPH2AIP1  | -0.16 | 0.34 | 0.61  | 0.56  | -1.28 | 0.78  | -0.20 | -1.18 | 1.53  | -1.15 | 0.85  | -0.51 |
| O43447 | Peptidyl-prolyl cis-trans isomerase H                             | PPIH      | -0.16 | 0.31 | -1.10 | 0.80  | 0.78  | -0.17 | 0.11  | -1.31 | -1.57 | 0.37  | 1.12  | 0.97  |
| Q8WZ19 | BTB/POZ domain-containing adapter for CUL3-mediated RhoA de       | CTCD13    | -0.16 | 1.32 | 1.41  | 0.74  | -1.08 | 0.09  | 0.27  | 0.24  | 0.08  | -2.17 | -0.21 | 0.63  |
| Q9BQ61 | Telomerase RNA component interacting RNase                        | TRIR      | -0.16 | 0.26 | 1.12  | 1.54  | -0.82 | -0.66 | -0.82 | -0.74 | 0.18  | 1.48  | -0.61 | -0.66 |
| P49006 | MARCKS-related protein                                            | MARCKSL1  | -0.16 | 0.43 | -1.35 | 0.74  | 2.19  | -0.61 | -0.39 | -0.85 | -0.29 | 0.59  | -0.27 | 0.23  |
| Q9GZ21 | N-alpha-acetyltransferase 50                                      | NAA50     | -0.16 | 0.27 | -1.70 | 1.30  | -0.32 | 0.50  | 0.59  | -1.71 | -0.13 | 0.42  | 0.36  | 0.68  |
| Q9BVP2 | Guanine nucleotide-binding protein-like 3                         | GNL3      | -0.17 | 0.29 | 0.04  | -0.08 | -0.43 | 1.24  | -0.37 | -0.08 | -1.86 | -0.83 | 1.50  | 0.87  |
| Q13442 | 28 kDa heat- and acid-stable phosphoprotein                       | PDAP1     | -0.17 | 0.28 | 0.97  | 0.47  | 1.50  | -0.99 | -1.55 | 0.38  | 0.16  | 0.50  | -1.33 | -0.10 |
| Q969E4 | Transcription elongation factor A protein-like 3                  | TCFAL3    | -0.17 | 0.13 | 0.11  | 0.91  | 0.89  | -1.37 | -0.36 | 0.24  | -0.12 | 1.22  | -1.91 | 0.38  |
| O15084 | Serine/threonine-protein phosphatase 6 regulatory ankyrin repeat  | ANKRD28   | -0.17 | 0.19 | 0.62  | 0.37  | -1.65 | 0.74  | 0.19  | 0.90  | -0.22 | -1.94 | 0.66  | 0.34  |
| O57323 | Protein NipSnap homolog 2                                         | NIPSNAP2  | -0.17 | 0.12 | -0.06 | 0.87  | 1.08  | -1.75 | 0.02  | 0.35  | 0.25  | 0.31  | -1.79 | 0.72  |
| P62424 | 60S ribosomal protein L7a                                         | RPL7A     | -0.17 | 0.49 | 0.16  | -1.21 | 2.01  | -0.80 | 0.49  | -0.66 | 0.46  | -0.34 | -1.01 | 0.91  |
| P27987 | Inositol-trisphosphate 3-kinase B                                 | ITPKB     | -0.17 | 0.54 | 0.04  | 1.42  | -0.84 | 0.84  | -0.77 | 0.17  | -1.94 | 0.87  | 0.56  | -0.34 |
| Q8N1B4 | Vacuolar protein sorting-associated protein 52 homolog            | VPSS2     | -0.17 | 0.27 | 1.31  | 1.22  | -1.86 | 0.14  | -0.43 | 0.62  | 0.38  | -1.26 | 0.08  | -0.18 |
| Q9H7V2 | Synapse differentiation-inducing gene protein 1                   | SYNDIG1   | -0.17 | 0.10 | 1.31  | -1.09 | -1.10 | 0.59  | 0.44  | 0.95  | 0.78  | -1.26 | 0.43  | -1.03 |
| P23284 | Peptidyl-prolyl cis-trans isomerase B                             | PPIB      | -0.17 | 0.82 | -0.30 | 0.83  | 1.32  | 0.49  | -1.37 | 0.52  | -0.08 | -1.00 | 1.02  | -1.43 |
| P62308 | Small nuclear ribonucleoprotein G                                 | SNRPG     | -0.17 | 0.38 | 1.30  | -1.60 | 1.19  | -0.65 | 0.25  | -0.55 | -1.17 | 0.38  | -0.16 | 1.00  |
| P60981 | Dextrin                                                           | DSTN      | -0.17 | 0.53 | 0.66  | 0.08  | -0.56 | 1.16  | -0.66 | -0.03 | 0.12  | -2.24 | 1.14  | 0.33  |
| P62847 | 40S ribosomal protein S24                                         | RPS24     | -0.17 | 0.27 | -1.76 | 0.53  | -0.34 | 0.02  | 1.92  | -1.07 | -0.47 | 0.45  | 0.38  | 0.34  |
| Q5JSL3 | Dedicator of cytokinesis protein 11                               | DOCK11    | -0.17 | 0.20 | -0.45 | 1.23  | -0.84 | 1.17  | -0.83 | -0.69 | -0.67 | -1.10 | 0.96  | 1.21  |
| Q8NEL9 | Phospholipase DDHD1                                               | DDHD1     | -0.17 | 0.38 | -0.35 | 1.80  | -0.95 | 0.71  | -0.70 | 0.71  | 1.00  | -1.31 | -0.23 | -0.68 |
| P35269 | General transcription factor IIF subunit 1                        | GTFF2F1   | -0.17 | 0.45 | -0.06 | 0.78  | 0.92  | -0.58 | -0.46 | -0.72 | 1.95  | -1.45 | 0.31  | -0.69 |
| Q8IWB9 | Testis-expressed protein 2                                        | TEX2      | -0.17 | 0.18 | -2.05 | 0.18  | 1.19  | 0.77  | 0.16  | -0.65 | -1.14 | 0.56  | 0.82  | 0.15  |
| Q14978 | Nucleolar and coiled-body phosphoprotein 1                        | NOLC1     | -0.17 | 0.40 | -0.92 | 1.29  | 0.21  | 0.86  | -0.92 | -0.45 | -1.74 | -0.12 | 0.96  | 0.82  |
| Q9C0C2 | 182 kDa tankyrase-1-binding protein                               | TNKS1BP1  | -0.17 | 0.13 | 1.47  | 0.15  | -0.93 | -0.03 | -0.47 | 1.57  | 0.90  | -1.11 | -0.79 | -0.76 |
| P11908 | Ribose-phosphate pyrophosphokinase 2                              | PRPS2     | -0.17 | 0.25 | -0.13 | -0.40 | -0.69 | 2.07  | -0.50 | -0.36 | -0.43 | -0.91 | 1.61  | -0.26 |
| Q53HC9 | EARP and GARP complex-interacting protein 1                       | EIPR1     | -0.17 | 0.28 | 1.90  | -0.29 | -0.61 | 0.45  | -1.06 | 1.22  | -0.01 | -1.04 | 0.39  | -0.95 |
| Q01970 | 1-phosphatidylinositol 4,5-bisphosphate phosphodiesterase beta-3  | PLCB3     | -0.18 | 0.20 | -0.75 | 0.45  | 0.76  | -1.39 | 1.22  | 0.61  | 0.97  | -1.65 | 0.16  | -0.38 |
| Q8N2C7 | Protein unc-80 homolog                                            | UNC80     | -0.18 | 0.20 | 1.29  | -0.22 | -1.60 | 0.23  | 0.57  | 0.69  | 1.41  | -0.89 | -0.76 | -0.72 |
| P41594 | Metabotropic glutamate receptor 5                                 | GRM5      | -0.18 | 0.40 | 1.42  | -1.45 | -0.74 | 0.50  | 0.80  | -1.62 | -0.31 | 0.49  | 0.69  | 0.21  |
| Q9HD20 | Manganese-transporting ATPase 13A1                                | ATP13A1   | -0.18 | 0.14 | 0.91  | 0.71  | -1.28 | 0.01  | -0.14 | 0.67  | 0.93  | -2.15 | 0.05  | 0.28  |
| Q9UHD8 | Septin-9                                                          | SEPTIN9   | -0.18 | 0.75 | 0.20  | 1.85  | 0.65  | -0.20 | -1.58 | 0.68  | 0.48  | -0.77 | -1.11 | -0.19 |
| Q13094 | Lymphocyte cytosolic protein 2                                    | LCP2      | -0.18 | 0.23 | 1.62  | 1.07  | -0.91 | -0.63 | -0.82 | -0.51 | 0.97  | -1.00 | -0.64 | 0.86  |
| P27701 | CD82 antigen                                                      | CD82      | -0.18 | 0.19 | -0.92 | 0.45  | -0.08 | -0.51 | 1.34  | -0.49 | 0.14  | 1.96  | -0.81 | -1.07 |
| Q13619 | Cullin-4A                                                         | CUL4A     | -0.18 | 0.77 | 0.86  | 1.25  | -0.76 | 0.56  | -0.97 | -0.04 | -0.13 | -1.94 | 0.16  | 1.02  |
| P54253 | Ataxin-1                                                          | ATXN1     | -0.18 | 0.22 | 0.93  | -1.05 | -1.18 | 0.67  | 0.94  | 0.45  | -0.95 | -1.38 | 0.94  | 0.63  |
| P41227 | N-alpha-acetyltransferase 10                                      | NAA10     | -0.18 | 0.70 | -1.04 | 0.16  | 0.71  | -0.23 | 1.26  | -2.13 | -0.40 | 0.42  | 0.84  | 0.41  |
| P59998 | Actin-related protein 2/3 complex subunit 4                       | ARPC4     | -0.18 | 0.45 | 0.49  | 1.66  | -1.22 | 0.93  | -1.27 | -0.37 | 0.56  | -1.12 | 0.54  | -0.20 |
| Q99943 | 1-acyl-sn-glycerol-3-phosphate acyltransferase alpha              | AGPAT1    | -0.18 | 0.65 | 0.27  | 1.68  | -0.19 | 0.59  | -1.53 | -1.53 | -0.25 | 0.96  | 0.20  | -0.20 |
| Q15437 | Protein transport protein Sec23B                                  | SEC23B    | -0.18 | 0.79 | -0.01 | 0.83  | -1.62 | 0.61  | 1.13  | 0.07  | -0.14 | -1.87 | 0.59  | 0.40  |
| Q8NEY8 | Periplin-1                                                        | PPHLN1    | -0.18 | 1.24 | 0.43  | -0.25 | -0.99 | -0.06 | 2.23  | 0.37  | -0.32 | -1.59 | 0.09  | 0.08  |
| P28715 | DNA repair protein complementing XP-G cells                       | ERCC5     | -0.18 | 1.64 | 1.16  | 0.61  | -0.87 | 0.53  | 0.24  | 0.70  | 0.33  | -2.34 | -0.29 | -0.09 |
| Q9UFB7 | Zinc finger and BTB domain-containing protein 47                  | ZBTB47    | -0.18 | 0.27 | 0.80  | -0.91 | -0.95 | 0.90  | 0.53  | -0.66 | -0.79 | -1.21 | 0.72  | 1.58  |
| O14531 | Dihydropyrimidinase-related protein 4                             | DPYSL4    | -0.18 | 0.68 | 0.33  | 0.57  | -1.13 | -0.35 | 1.43  | 0.07  | 0.94  | 0.40  | -0.25 | -2.00 |
| O75569 | Interferon-inducible double-stranded RNA-dependent protein kinase | PRKRA     | -0.18 | 0.53 | 1.33  | -1.12 | -1.09 | 1.08  | 0.49  | -1.19 | 0.93  | -0.78 | 0.65  | -0.30 |
| Q96BM9 | ADP-ribosylation factor-like protein 8A                           | ARL8A     | -0.18 | 1.17 | -0.38 | 1.12  | 0.16  | 0.89  | -0.48 | -1.34 | 1.06  | -1.74 | 0.78  | -0.07 |
| P04264 | Keratin, type II cytoskeletal 1                                   | KRT1      | -0.19 | 0.17 | 0.09  | -1.17 | -0.32 | 1.03  | 0.61  | 1.63  | 0.90  | -0.96 | -0.71 | -1.09 |
| O60879 | Protein diaphanous homolog 2                                      | DIAPH2    | -0.19 | 0.23 | -1.36 | 1.12  | -0.16 | 0.72  | 0.00  | -0.45 | 0.90  | -1.90 | 0.36  | 0.77  |
| Q9Y2W6 | Tudor and KH domain-containing protein                            | TDRKH     | -0.19 | 0.16 | 1.92  | 0.27  | -0.98 | -0.13 | -0.84 | 1.24  | 0.49  | -1.08 | -0.79 | -0.10 |
| O00459 | Phosphatidylinositol 3-kinase regulatory subunit beta             | PIK3R2    | -0.19 | 0.20 | 2.06  | -0.47 | -0.56 | -0.33 | -0.41 | -0.46 | 1.70  | -0.72 | -0.44 | -0.37 |
| Q9NZW5 | MAGUK p55 subfamily member 6                                      | MPP6      | -0.19 | 0.32 | 0.68  | 0.35  | -0.82 | 0.54  | -0.32 | 0.75  | 0.59  | -2.48 | 0.23  | 0.47  |
| Q08211 | ATP-dependent RNA helicase A                                      | DHX9      | -0.19 | 0.32 | -0.99 | 1.29  | -0.71 | 0.98  | -0.13 | -0.29 | -1.75 | -0.20 | 1.10  | 0.70  |
| P07203 | Glutathione peroxidase 1                                          | GPX1      | -0.19 | 0.14 | -0.37 | 0.26  | 1.20  | -0.28 | -0.60 | -1.17 | -1.26 | 1.96  | -0.10 | 0.35  |
| P54277 | PMS1 protein homolog 1                                            | PMS1      | -0.19 | 0.15 | -0.34 | -0.49 | 2.02  | -0.47 | -0.50 | -0.49 | -0.48 | 1.77  | -0.48 | -0.52 |
| P46736 | Lys-63-specific deubiquitinase BRCC36                             | BRCC3     | -0.19 | 0.57 | -0.49 | -1.14 | 2.03  | 0.75  | -0.42 | -1.24 | -0.68 | 0.64  | 0.42  | 0.12  |
| O15371 | Eukaryotic translation initiation factor 3 subunit D              | EIF3D     | -0.19 | 0.48 | -0.76 | 1.30  | 0.12  | 0.56  | -0.61 | 0.19  | -0.27 | -2.14 | 0.66  | 0.94  |
| Q8WXA3 | RUN and FYVE domain-containing protein 2                          | RUFY2     | -0.19 | 0.38 | 0.08  | -0.21 | -0.79 | 0.37  | 1.05  | 0.84  | -2.43 | 0.51  | 0.19  | 0.38  |
| P49711 | Transcriptional repressor CTCF                                    | CTCF      | -0.19 | 0.25 | 1.40  | -1.70 | -0.65 | 0.87  | 0.41  | 0.74  | 0.48  | -0.98 | 0.38  | -0.95 |
| Q00577 | Transcriptional activator protein Pur-alpha                       | PURA      | -0.19 | 1.10 | 1.55  | -0.47 | -0.64 | 1.16  | -0.37 | -1.47 | 0.39  | -1.14 | 0.91  | 0.07  |
| Q9BYK8 | Helicase with zinc finger domain 2                                | HELZ2     | -0.19 | 0.13 | 1.26  | -0.18 | -1.31 | -0.31 | 0.72  | 1.17  | 0.07  | 0.94  | -1.18 | -1.18 |
| Q9Y243 | RAC-gamma serine/threonine-protein kinase                         | AKT3      | -0.19 | 0.46 | -0.01 | 0.38  | 0.30  | 0.40  | -0.45 | -0.16 | -2.50 | 1.37  | 0.23  | 0.44  |
| P32004 | Neural cell adhesion molecule L1                                  | L1CAM     | -0.19 | 0.43 | 1.22  | 1.00  | -0.03 | -1.71 | 0.10  | 0.60  | -0.07 | -1.01 | -1.10 | 1.01  |
| Q96RR4 | Calcium/calmodulin-dependent protein kinase kinase 2              | CAMKK2    | -0.19 | 0.34 | -0.04 | 0.38  | 0.24  | 0.18  | -0.29 | 2.27  | -1.57 | 0.15  | -0.35 | -0.97 |
| P25085 | DNA mismatch repair protein Msh3                                  | MSH3      | -0.19 | 1.74 | 1.50  | 0.60  | -0.89 | 0.16  | 0.36  | -0.14 | 0.29  | -2.26 | 0.49  | -0.11 |
| Q9UQB3 | Catenin delta-2                                                   | CTNND2    | -0.19 | 0.46 | -2.06 | 1.38  | 1.37  | 0.27  | -0.36 | -0.26 | -0.71 | -0.09 | 0.01  | 0.43  |
| Q16620 | BDNF/NT-3 growth factors receptor                                 | NTRK2     | -0.19 | 0.16 | -2.05 | 1.04  | -0.37 | 0.89  | 0.72  | -1.14 | 0.15  | -0.45 | 0.73  | 0.49  |
| O00399 | Dynactin subunit 6                                                | DCTN6     | -0.19 | 0.51 | 0.75  | 0.51  | -0.48 | 1.24  | -1.37 | 0.39  | -1.81 | -0.41 | 0.95  | 0.22  |
| P49841 | Glycogen synthase kinase-3 beta                                   | GSK3B     | -0.19 | 0.27 | -1.28 | 0.49  | 0.43  | 0.49  | 0.25  | -1.95 | 1.45  | -0.60 | 0.57  | 0.15  |
| Q9Y4K1 | Beta/gamma crystallin domain-containing protein 1                 | CRYBG1    | -0.20 | 0.68 | 0.07  | -1.82 | 0.25  | 0.34  | 2.01  | -0.60 | -0.92 | 0.19  | 0.04  | 0.44  |
| P30405 | Peptidyl-prolyl cis-trans isomerase F, mitochondrial              | PPIF      | -0.20 | 0.29 | -1.62 | -0.35 | 0.80  | 0.73  | 0.83  | -1.13 | -1.28 | 0.37  | 0.75  | 0.89  |
| P84074 | Neuron-specific calcium-binding protein hippocalcin               | HPCA      | -0.20 | 0.21 | -1.89 | 0.63  | 0.16  | 0.23  | 1.16  | -1.59 | 0.49  | 0.91  | -0.13 | 0.02  |
| Q9Y3Q8 | TSC22 domain family protein 4                                     | TSC22D4   | -0.20 | 0.19 | 0.66  | 1.09  | -1.44 | 0.06  | -0.10 | -1.28 | -1.31 | 0.83  | 0.48  | 1.01  |
| Q9UPN6 | SR-related and CTD-associated factor 8                            | SCAF8     | -0.20 | 0.28 | -1.20 | 0.23  | -0.41 | 1.05  | 0.71  | -1.35 | -1.41 | 0.83  | 0.64  | 0.89  |
| P02689 | Myelin P2 protein                                                 | PMP2      | -0.20 | 0.22 | -0.44 | -0.99 | 2.29  | 0.26  | -0.81 | -0.09 | -1.09 | 0.50  | 0.59  | -0.22 |
| P69892 | Hemoglobin subunit gamma-2                                        | HBG2      | -0.20 | 0.15 | -1.65 | 0.86  | 0.04  | 0.62  | 0.35  | -1.65 | -0.35 | 1.34  | 0.59  | -0.15 |
| Q58FF8 | Putative heat shock protein HSP 90-beta 2                         | HSP90AB2P | -0.20 | 0.51 | -0.09 | -0.35 | -0.96 | 0.33  | 1.74  | -0.32 | -0.49 | -1.14 | -0.45 | 1.73  |
| O60861 | Growth arrest-specific protein 7                                  | GAS7      | -0.20 | 0.62 | -0.57 | 2.05  | 0.12  | -0.59 | -0.23 | -0.66 | 1.32  | -1.29 | -0.40 | 0.26  |
| Q9Y570 | Protein phosphatase methylesterase 1                              | PPME1     | -0.20 | 0.54 | 0.06  | 1.58  | -0.31 | -0.23 | -0.42 | 0.48  | 0.87  | -2.25 | -0.12 | 0.33  |
| Q53T59 | HCLS1-binding protein 3                                           | HSIBP3    | -0.20 | 0.46 | -0.71 | 0.80  | -0.59 | 0.81  | 0.31  | -0.53 | -2.04 | -0.17 | 1.13  | 1.00  |
| Q14166 | Tubulin-tyrosine ligase-like protein 12                           | TTL12     | -0.20 | 0.39 | 1.17  | -0.31 | -1.67 | 1.14  | 0.19  | 0.51  | -1.45 | -0.54 | 0.84  | 0.13  |
| Q8WVM8 | Sec1 family domain-containing protein 1                           | SCFD1     | -0.20 | 0.18 | -2.29 | 0.18  | 0.66  | 0.26  | 1.46  | -0.76 | -0.45 | 0.37  | 0.32  | 0.25  |
| O14682 | Ectoderm-neural cortex protein 1                                  | ENC1      | -0.20 | 0.13 | 0.28  | -0.63 | -0.67 | 0.41  | 0.81  | -0.63 | 2.36  | -0.79 | -0.59 | -0.55 |

|        |                                                                   |          |       |      |       |       |       |       |       |       |       |       |       |       |
|--------|-------------------------------------------------------------------|----------|-------|------|-------|-------|-------|-------|-------|-------|-------|-------|-------|-------|
| Q9NWF9 | E3 ubiquitin-protein ligase RNF216                                | RNF216   | -0.21 | 0.35 | -0.16 | -0.36 | -0.74 | -0.40 | 2.15  | -0.57 | -0.49 | 1.57  | -0.54 | -0.44 |
| Q15819 | Ubiquitin-conjugating enzyme E2 variant 2                         | UBE2V2   | -0.21 | 0.81 | -0.51 | 1.48  | -0.48 | -0.22 | 0.72  | -1.92 | -0.45 | 1.36  | 0.02  | 0.02  |
| P05534 | HLA class I histocompatibility antigen, A-24 alpha chain          | HLA-A    | -0.17 | 0.17 | -0.50 | 1.45  | -0.05 | 0.84  | -1.51 | 0.45  | 0.24  | -1.71 | 0.69  | 0.09  |
| Q92974 | Rho guanine nucleotide exchange factor 2                          | ARHGEP2  | -0.21 | 0.35 | 0.40  | 0.31  | -1.71 | 1.11  | 0.36  | 0.57  | -0.73 | -1.54 | 1.09  | 0.14  |
| Q97546 | Vacuolar protein sorting-associated protein 26A                   | VPS26A   | -0.21 | 1.20 | 1.24  | 1.33  | 0.62  | 0.26  | -2.09 | 0.14  | 0.04  | -0.52 | -0.67 | -0.37 |
| Q9NXA8 | NAD-dependent protein deacetylase sirtuin-5, mitochondrial        | SIRT5    | -0.21 | 1.07 | -0.04 | 1.46  | 0.83  | 0.76  | -1.78 | -0.16 | -1.36 | -0.34 | 0.68  | -0.06 |
| Q6YN16 | Hydroxysteroid dehydrogenase-like protein 2                       | HSDL2    | -0.21 | 0.22 | -1.27 | 0.13  | 0.01  | 0.57  | 0.86  | -1.29 | -1.54 | 1.15  | 0.54  | 0.82  |
| A0FG8R | Extended synaptotagmin-2                                          | ESYT2    | -0.21 | 0.30 | -0.42 | 0.21  | -0.45 | -0.18 | 1.24  | 0.87  | 0.39  | -2.41 | 0.45  | 0.29  |
| Q75882 | Attractin                                                         | ATRN     | -0.21 | 0.26 | 0.71  | 0.40  | -1.18 | -0.91 | 1.35  | -0.85 | 0.82  | 1.25  | -0.97 | -0.62 |
| Q9NP78 | ATP-binding cassette sub-family B member 9                        | ABC89    | -0.21 | 0.32 | -0.21 | 1.14  | -0.39 | 1.13  | -1.23 | -0.15 | -1.53 | -0.66 | 1.21  | 0.69  |
| Q9GZZ9 | Ubiquitin-like modifier-activating enzyme 5                       | UBA5     | -0.21 | 0.41 | 0.64  | 1.24  | -1.22 | 0.55  | -0.67 | 0.60  | 0.65  | -1.99 | 0.23  | -0.04 |
| Q5VWJ9 | Sorting nexin-30                                                  | SNX30    | -0.21 | 0.18 | 1.47  | 0.62  | -1.52 | -0.33 | 0.02  | 1.16  | 0.59  | -1.50 | -0.25 | -0.25 |
| P23443 | Ribosomal protein S6 kinase beta-1                                | RPS6KB1  | -0.21 | 0.38 | -0.25 | 2.30  | -0.65 | -0.43 | -0.47 | -0.37 | -0.28 | -0.84 | -0.34 | 1.33  |
| Q9BTW9 | Tubulin-specific chaperone D                                      | TBCD     | -0.21 | 0.52 | 2.03  | 0.06  | -0.90 | -0.50 | -0.01 | 0.76  | 0.64  | -1.66 | -0.16 | -0.25 |
| Q9HAT2 | Sialate O-acetyltransferase                                       | SLAE     | -0.21 | 0.23 | 1.33  | 0.06  | -2.01 | 0.48  | 0.45  | -1.10 | -0.36 | 1.19  | -0.07 | 0.01  |
| Q75582 | Ribosomal protein S6 kinase alpha-5                               | RPS6KA5  | -0.21 | 0.66 | 0.77  | -1.17 | -0.31 | 0.40  | 1.13  | -0.60 | -1.62 | 1.50  | -0.40 | 0.30  |
| Q9Y4P3 | Transducin beta-like protein 2                                    | TBL2     | -0.21 | 0.19 | 1.16  | -0.95 | -1.13 | 0.50  | 0.70  | 0.75  | 1.16  | -1.32 | -1.04 | 0.17  |
| Q96SW2 | Protein cereblon                                                  | CRBN     | -0.21 | 0.65 | 1.33  | -0.59 | -0.65 | 1.01  | -0.29 | 0.68  | -1.40 | -1.29 | 1.12  | 0.08  |
| O60443 | Gasdermin-E                                                       | GSDME    | -0.21 | 0.30 | -1.65 | 0.11  | 1.07  | 0.32  | 0.55  | -0.08 | -1.91 | 0.79  | 0.65  | 0.14  |
| Q5VWP3 | Muscular LMNA-interacting protein                                 | MLIP     | -0.21 | 0.26 | 1.66  | 1.10  | -1.22 | 0.06  | -1.24 | 0.24  | -1.14 | 0.77  | -0.29 | 0.06  |
| Q9UNZ5 | Leydig cell tumor 10 kDa protein homolog                          | C15orf53 | -0.21 | 0.38 | -1.02 | 0.53  | 0.46  | -0.25 | 0.78  | 1.63  | -1.84 | -0.04 | -0.73 | 0.47  |
| P00167 | Cytochrome b5                                                     | CYB5A    | -0.21 | 0.30 | -0.11 | 2.09  | -0.69 | -0.34 | -0.55 | -0.42 | -0.38 | -0.76 | -0.47 | 1.62  |
| Q9NZ52 | ADP-ribosylation factor-binding protein GGA3                      | GGA3     | -0.21 | 0.46 | 0.74  | 0.70  | -0.66 | 1.69  | -1.85 | 0.36  | 0.32  | -0.30 | -0.03 | -0.96 |
| Q9NZR1 | Tropomodulin-2                                                    | TMO2     | -0.21 | 0.53 | 1.79  | 0.92  | -0.37 | -1.14 | -0.52 | 1.02  | 0.37  | -0.22 | -1.30 | -0.56 |
| P08263 | Glutathione S-transferase A1                                      | GSTA1    | -0.21 | 0.30 | 2.42  | -0.44 | -0.66 | -0.41 | -0.50 | -0.34 | -0.34 | 1.20  | -0.50 | -0.44 |
| P55786 | Puromycin-sensitive aminopeptidase                                | NPEPPS   | -0.21 | 0.66 | 0.69  | 2.06  | -1.04 | -0.24 | -0.63 | 1.26  | -0.49 | -0.34 | -0.52 | -0.73 |
| Q8WUR7 | UPF0235 protein C15orf40                                          | C15orf40 | -0.21 | 0.24 | -1.30 | -0.02 | 0.90  | 0.40  | 0.36  | -1.40 | -1.40 | 0.82  | 1.17  | 0.47  |
| O00625 | Pirin                                                             | PIR      | -0.21 | 0.70 | 0.18  | -0.50 | 1.76  | 0.08  | -0.65 | 1.25  | -1.78 | -0.12 | 0.36  | -0.58 |
| P55809 | Succinyl-CoA:3-ketoacid coenzyme A transferase 1, mitochondria    | OXCT1    | -0.21 | 0.35 | -0.84 | 0.33  | 2.17  | -0.34 | -0.85 | -1.31 | 0.93  | -0.08 | -0.13 | 0.12  |
| O43822 | Cilia- and flagella-associated protein 410                        | CFAP410  | -0.22 | 0.34 | 1.24  | 0.12  | -0.91 | -0.03 | 0.05  | 1.87  | -1.32 | -1.17 | 0.05  | 0.12  |
| Q9NZM1 | Myoferlin                                                         | MYOF     | -0.22 | 0.70 | -0.61 | 1.49  | 0.09  | -1.10 | 0.98  | -0.88 | 1.16  | -0.82 | -0.99 | 0.68  |
| Q9BVC4 | Target of rapamycin complex subunit LST8                          | MLST8    | -0.22 | 0.16 | 0.42  | 0.18  | -1.58 | 0.90  | 0.31  | 1.53  | -0.43 | -1.67 | 0.18  | 0.17  |
| Q17L70 | Histone H2A type 3                                                | HIST3H2A | -0.22 | 0.32 | 0.67  | -1.97 | 1.49  | 0.12  | 0.13  | 0.28  | -1.39 | -0.17 | 0.45  | 0.39  |
| P07996 | Thrombospondin-1                                                  | THBS1    | -0.22 | 0.30 | 0.47  | 0.79  | -1.21 | 1.26  | -0.90 | 0.15  | -1.01 | -1.31 | 0.99  | 0.77  |
| Q53GG5 | PDZ and LIM domain protein 3                                      | PDLIM3   | -0.22 | 0.42 | 0.84  | 1.84  | -1.01 | -0.09 | -1.02 | -0.02 | -0.71 | -0.38 | -0.73 | 1.29  |
| P47756 | F-actin-capping protein subunit beta                              | CAPZB    | -0.22 | 0.90 | -0.36 | 1.30  | 0.48  | 0.73  | -1.10 | -1.96 | -0.52 | 0.86  | 0.59  | -0.03 |
| Q16512 | Serine/threonine-protein kinase N1                                | PKN1     | -0.22 | 0.26 | 0.14  | 0.56  | -1.24 | 0.71  | 0.20  | 1.32  | 0.07  | -1.48 | -1.28 | 1.01  |
| Q9NT62 | Ubiquitin-like-conjugating enzyme ATG3                            | ATG3     | -0.22 | 0.76 | -0.48 | 1.37  | -0.87 | 1.03  | -0.14 | -0.37 | -1.01 | -1.16 | 0.03  | 1.59  |
| Q9NSB4 | Keratin, type II cuticular Hb2                                    | KRT82    | -0.22 | 0.14 | -0.73 | 1.58  | -0.89 | 0.28  | -0.04 | -0.81 | -0.82 | 1.84  | 0.16  | -0.57 |
| Q99615 | DnaJ homolog subfamily C member 7                                 | DNAJC7   | -0.22 | 0.46 | -0.13 | 1.11  | -0.83 | 0.39  | 0.07  | -0.16 | 0.78  | -2.34 | 0.24  | 0.87  |
| Q9Y279 | V-set and immunoglobulin domain-containing protein 4              | VSIG4    | -0.22 | 1.42 | 0.71  | 2.04  | -0.93 | -0.31 | 0.00  | -0.17 | -0.08 | -1.78 | 0.11  | 0.42  |
| Q75683 | Surfeit locus protein 6                                           | SURF6    | -0.22 | 0.20 | -0.57 | -1.60 | 0.26  | 0.49  | 1.70  | 0.35  | 0.31  | 0.29  | 0.35  | -1.58 |
| Q9Y220 | Protein SGT1 homolog                                              | SUGT1    | -0.22 | 0.74 | -0.40 | 1.81  | 0.07  | 0.41  | -0.98 | -0.17 | 0.75  | -1.89 | 0.50  | -0.10 |
| Q75145 | Liprin-alpha-3                                                    | PPFIA3   | -0.22 | 0.31 | -1.16 | 0.90  | -0.14 | 0.83  | 0.00  | -0.69 | -1.81 | -0.08 | 0.94  | 1.22  |
| Q8TBF2 | Prostamide/prostaglandin F synthase                               | PRXL2B   | -0.22 | 0.27 | -1.44 | 0.99  | 0.80  | 0.52  | -0.50 | 0.74  | 0.48  | -0.11 | 0.46  | -1.94 |
| P17812 | CTP synthase 1                                                    | CTPS1    | -0.22 | 0.42 | 0.40  | 0.43  | -0.90 | 0.15  | 0.46  | -1.49 | 2.08  | -0.95 | 0.17  | -0.37 |
| P01034 | Cystatin-C                                                        | CST3     | -0.22 | 0.62 | 0.27  | 0.30  | -0.12 | 1.09  | -0.76 | -1.30 | -1.30 | 1.40  | 1.11  | -0.70 |
| Q81ZP0 | Abl interactor 1                                                  | ABI1     | -0.22 | 0.74 | 1.24  | 0.52  | -0.48 | 0.15  | -0.52 | 1.90  | -0.52 | -1.19 | 0.06  | -1.18 |
| Q00765 | Receptor expression-enhancing protein 5                           | REEP5    | -0.22 | 0.54 | 0.29  | -0.53 | -0.63 | 0.80  | 0.77  | -0.85 | -0.93 | 2.19  | -0.51 | -0.61 |
| O95232 | Luc7-like protein 3                                               | LUC7L3   | -0.22 | 0.50 | 0.30  | -0.87 | -0.89 | -0.36 | 2.49  | 0.06  | 0.29  | -0.45 | -0.83 | 0.26  |
| Q81WZ6 | Bardet-Biedl syndrome 7 protein                                   | BBS7     | -0.22 | 0.47 | 1.54  | -0.27 | -0.94 | 0.22  | 0.06  | -0.16 | -0.87 | -1.51 | 0.37  | 1.56  |
| Q8TB72 | Pumilio homolog 2                                                 | PUM2     | -0.22 | 0.30 | 0.70  | -1.06 | -0.62 | 0.25  | 1.15  | -1.03 | 1.86  | -1.03 | -0.06 | -0.15 |
| Q99523 | Sortilin                                                          | SORT1    | -0.22 | 0.31 | 1.43  | -0.62 | 0.05  | 0.33  | -0.75 | -0.63 | -1.43 | 1.63  | 0.64  | -0.63 |
| P60903 | Protein S100-A10                                                  | S100A10  | -0.22 | 0.19 | -0.91 | 1.37  | 0.62  | -1.07 | 0.26  | -1.10 | -1.08 | 1.09  | -0.22 | 1.05  |
| Q96B18 | Dapper homolog 3                                                  | DACT3    | -0.22 | 0.29 | 2.19  | -0.50 | -0.53 | -0.28 | -0.48 | -0.35 | -0.44 | -0.74 | -0.40 | 1.54  |
| Q96L92 | Sorting nexin-27                                                  | SNX27    | -0.22 | 0.59 | 1.34  | -0.24 | -0.87 | 0.80  | -0.27 | 0.74  | -1.07 | -1.76 | 0.72  | 0.62  |
| Q96RE7 | Nucleus accumbens-associated protein 1                            | NACC1    | -0.22 | 0.21 | 1.05  | -0.74 | -0.85 | -0.61 | 1.44  | -0.71 | 1.14  | -1.04 | -0.64 | 0.95  |
| Q81YB5 | Stromal membrane-associated protein 1                             | SMAP1    | -0.23 | 0.50 | 0.14  | 1.58  | -1.16 | 0.60  | -0.53 | 0.23  | 0.79  | -1.90 | 0.42  | -0.19 |
| Q9NRS6 | Sorting nexin-15                                                  | SNX15    | -0.23 | 0.33 | 1.40  | -0.62 | -1.05 | -0.14 | 0.85  | 0.60  | 0.12  | 0.93  | -0.20 | -1.88 |
| Q6P1J9 | Parafibromin                                                      | CDC73    | -0.23 | 0.68 | 0.66  | 0.84  | -0.97 | 0.33  | 0.00  | 0.91  | -0.11 | -2.39 | 0.26  | 0.48  |
| Q96PY5 | Formin-like protein 2                                             | FMNL2    | -0.23 | 0.41 | -1.23 | -0.80 | 1.99  | 0.13  | 0.46  | -0.29 | -1.45 | 0.50  | 0.37  | 0.33  |
| Q13555 | Calcium/calmodulin-dependent protein kinase type II subunit gamma | CAMK2G   | -0.23 | 0.41 | 1.53  | -1.09 | -1.41 | 0.65  | 0.86  | 0.15  | -0.31 | -1.32 | 0.56  | 0.37  |
| P21246 | Pleiotrophin                                                      | PTN      | -0.23 | 0.29 | 0.81  | 1.03  | 0.68  | -0.29 | -1.84 | -0.52 | 0.88  | -1.13 | -0.50 | 0.87  |
| Q96GY0 | Zinc finger C2HC domain-containing protein 1A                     | ZC2HC1A  | -0.23 | 0.34 | 1.18  | 1.22  | -0.71 | 0.42  | -1.65 | 0.09  | 0.91  | -1.35 | 0.07  | -0.19 |
| P26368 | Splicing factor U2AF 65 kDa subunit                               | U2AF2    | -0.23 | 0.61 | 0.19  | -0.85 | -0.95 | 0.12  | 2.27  | -0.87 | -0.77 | 0.86  | -0.21 | 0.22  |
| Q9BVA1 | Tubulin beta-2B chain                                             | TUBB2B   | -0.23 | 0.28 | -0.14 | 0.17  | 0.13  | -0.03 | 0.27  | 1.31  | -2.56 | -0.17 | 0.44  | 0.59  |
| Q92777 | Synapsin-2                                                        | SYN2     | -0.23 | 0.38 | 0.27  | 1.53  | -0.96 | 0.21  | -0.54 | -1.35 | 1.71  | -0.75 | 0.04  | -0.16 |
| Q9UNW9 | RNA-binding protein Nova-2                                        | NOVA2    | -0.23 | 0.36 | 0.93  | -0.93 | -1.38 | 0.76  | 1.09  | -0.11 | -1.51 | 1.11  | 0.18  | -0.16 |
| Q9Y4J8 | Dystrobrein alpha                                                 | DTNA     | -0.23 | 0.64 | -0.56 | 1.84  | 0.59  | 0.52  | -1.58 | 0.78  | -0.52 | -1.14 | 0.07  | 0.01  |
| P50747 | Biotin-protein ligase                                             | HILCS    | -0.23 | 0.40 | -0.19 | 2.04  | -0.72 | 0.12  | -0.71 | -0.55 | 1.22  | -1.21 | -0.49 | 0.51  |
| Q9H4L5 | Oxysterol-binding protein-related protein 3                       | OSBPL3   | -0.23 | 0.27 | 1.04  | -0.49 | -1.95 | 0.90  | 0.88  | 0.15  | 0.14  | -1.33 | 0.70  | -0.05 |
| Q9H2K8 | Serine/threonine-protein kinase TAO3                              | TAOK3    | -0.23 | 0.21 | -1.75 | 1.00  | -1.14 | 0.38  | -0.48 | -1.05 | -1.03 | 0.40  | 0.64  | 0.74  |
| Q81ZF6 | Adhesion G-protein coupled receptor G4                            | ADGRG4   | -0.23 | 0.46 | -0.66 | -0.71 | -0.19 | 0.11  | 2.05  | -0.61 | -1.42 | 1.08  | 0.47  | -0.12 |
| Q14721 | Potassium voltage-gated channel subfamily B member 1              | KCNB1    | -0.23 | 0.51 | 0.99  | -0.07 | 0.79  | -0.52 | -0.51 | 0.75  | 1.60  | -1.46 | -1.22 | -0.34 |
| P50570 | Dynamin-2                                                         | DNM2     | -0.23 | 0.34 | -1.49 | 0.52  | 0.10  | 0.15  | 1.18  | -0.66 | -1.47 | 1.50  | 0.43  | -0.26 |
| P47985 | Cytochrome b-c1 complex subunit Rieske, mitochondrial             | UQCRCF1  | -0.23 | 0.31 | -1.59 | 1.07  | 0.85  | -0.07 | 0.17  | 0.30  | -0.10 | -0.26 | 1.29  | -1.65 |
| Q13554 | Calcium/calmodulin-dependent protein kinase type II subunit beta  | CAMK2B   | -0.23 | 0.48 | 1.23  | -0.94 | -1.52 | 1.06  | 0.80  | -0.23 | 0.62  | -1.37 | 0.45  | -0.10 |
| P53609 | Geranylgeranyl transferase type-1 subunit beta                    | PGGT1B   | -0.23 | 0.37 | -0.06 | 1.06  | 1.27  | -0.21 | -1.57 | 0.62  | -1.41 | -0.84 | 0.42  | 0.72  |
| P62820 | Ras-related protein Rab-1A                                        | RAB1A    | -0.23 | 0.91 | 1.14  | 1.77  | -1.34 | -0.33 | -0.17 | 0.26  | 0.88  | -0.74 | -1.02 | -0.46 |
| P84103 | Serine/arginine-rich splicing factor 3                            | SRSF3    | -0.23 | 0.88 | 0.43  | -0.83 | -0.10 | -0.16 | 1.71  | -1.33 | -1.39 | 0.19  | 0.36  | 1.14  |
| Q91H92 | Microtubule-associated proteins 1A/1B light chain 3A              | MAP1LC3A | -0.23 | 0.92 | -0.12 | 0.90  | 0.07  | 1.33  | -1.11 | -1.79 | -0.18 | 0.15  | 1.27  | -0.54 |
| Q92530 | Proteasome inhibitor PI31 subunit                                 | PSMF1    | -0.24 | 0.72 | 0.10  | -0.37 | 0.38  | 0.97  | -0.18 | 0.81  | -1.59 | -1.65 | 1.33  | 0.22  |
| O43790 | Keratin, type II cuticular Hb6                                    | KRT86    | -0.24 | 0.15 | -0.39 | 1.86  | -0.20 | -0.45 | -0.60 | -0.51 | -0.56 | 1.91  | -0.55 | -0.50 |

|        |                                                                   |          |       |      |       |       |       |       |       |       |       |       |       |       |
|--------|-------------------------------------------------------------------|----------|-------|------|-------|-------|-------|-------|-------|-------|-------|-------|-------|-------|
| P36776 | Lon protease homolog, mitochondrial                               | LONP1    | -0.24 | 0.69 | -0.56 | 0.71  | 0.48  | 0.35  | -0.12 | -1.28 | 0.96  | -1.95 | 0.20  | 1.20  |
| Q9P2P5 | E3 ubiquitin-protein ligase HECW2                                 | HECW2    | -0.24 | 0.33 | -0.25 | 1.07  | -1.10 | 0.96  | -0.23 | -0.84 | 1.26  | -1.38 | 1.05  | -0.54 |
| Q9UQF2 | C-Jun-amino-terminal kinase-interacting protein 1                 | MAPK8IP1 | -0.24 | 0.38 | 1.06  | 0.08  | 0.85  | -0.67 | -0.81 | 1.33  | 0.80  | -1.82 | -0.40 | -0.42 |
| P16452 | Erythrocyte membrane protein band 4.2                             | EPB42    | -0.24 | 0.36 | -0.99 | 1.39  | -1.38 | 0.75  | 0.71  | -1.21 | 0.83  | -0.49 | 0.76  | -0.37 |
| P40855 | Peroxisomal biogenesis factor 19                                  | PEX19    | -0.24 | 0.31 | 0.14  | 1.82  | -0.99 | 0.39  | -0.94 | -0.76 | -0.71 | 0.73  | -0.84 | 1.16  |
| Q8IXI2 | Mitochondrial Rho GTPase 1                                        | RHOT1    | -0.24 | 0.43 | 0.95  | 0.14  | -0.28 | 0.07  | -0.30 | 1.70  | -1.85 | -1.13 | 0.13  | 0.56  |
| Q5VIR6 | Vacuolar protein sorting-associated protein 53 homolog            | VP53     | -0.24 | 0.28 | -0.95 | 1.23  | -1.35 | 0.38  | 1.08  | -1.09 | 0.87  | -1.04 | 0.39  | 0.49  |
| Q9UEE9 | Craniofacial development protein 1                                | CFDP1    | -0.24 | 0.37 | -0.19 | -0.25 | -0.53 | -0.80 | 2.27  | -0.41 | -0.42 | -0.76 | 1.35  | -0.25 |
| Q92608 | Dedicator of cytokinesis protein 2                                | DOCK2    | -0.24 | 0.36 | 1.10  | 0.54  | -1.26 | 0.41  | -0.30 | -0.27 | 1.69  | -1.49 | 0.24  | -0.65 |
| Q01085 | Nucleolysin TIAR                                                  | TIAL1    | -0.24 | 0.62 | 1.09  | -0.59 | -1.12 | 0.13  | 1.27  | -0.40 | 0.78  | -1.87 | 0.18  | 0.52  |
| Q92804 | TATA-binding protein-associated factor 2N                         | TAF15    | -0.24 | 0.55 | 2.30  | -0.63 | -0.98 | 0.24  | -0.22 | -1.27 | 0.44  | 0.38  | 0.24  | -0.49 |
| Q96B35 | CDK5 regulatory subunit-associated protein 3                      | CDKSRAP3 | -0.24 | 0.39 | -0.61 | -0.40 | -0.56 | -0.63 | 2.72  | 0.05  | 0.24  | -0.47 | -0.24 | -0.10 |
| Q9NP16 | mRNA-decapping enzyme 1A                                          | DCP1A    | -0.24 | 0.40 | 2.10  | -0.11 | -0.69 | -0.28 | -0.49 | -0.10 | -0.45 | -1.07 | 1.50  | -0.42 |
| Q9Y277 | Voltage-dependent anion-selective channel protein 3               | VDAC3    | -0.24 | 0.44 | 1.02  | -0.47 | 0.76  | 0.09  | -0.81 | -1.56 | 0.60  | -1.42 | 0.76  | 1.04  |
| Q8WXH2 | Junctophilin-3                                                    | JPH3     | -0.24 | 0.36 | 1.11  | 0.51  | -0.91 | 1.22  | -1.44 | -0.41 | 0.56  | -1.49 | 0.30  | 0.56  |
| Q6NZI2 | Caveolae-associated protein 1                                     | CAVIN1   | -0.24 | 0.26 | 0.71  | 1.19  | 0.53  | -0.89 | -1.18 | 0.49  | -0.75 | -1.46 | 0.07  | 1.30  |
| P51798 | H(+)/Cl(-) exchange transporter 7                                 | CLCN7    | -0.24 | 0.40 | 0.51  | 0.02  | -1.61 | 0.72  | 0.89  | -0.13 | -0.47 | -1.69 | 0.54  | 1.21  |
| Q9Y250 | Leucine zipper putative tumor suppressor 1                        | LZTS1    | -0.24 | 0.27 | 0.20  | -1.70 | -0.34 | 1.05  | 1.17  | -0.73 | -1.30 | 0.32  | 1.05  | 0.29  |
| Q9NRA0 | Sphingosine kinase 2                                              | SPHK2    | -0.24 | 0.26 | 0.31  | 0.51  | -1.71 | 0.80  | 0.45  | 0.18  | -0.26 | -1.86 | 0.98  | 0.60  |
| Q6SZW1 | Sterile alpha and TIR motif-containing protein 1                  | SARM1    | -0.24 | 0.35 | -0.22 | 2.19  | -0.62 | -0.49 | -0.40 | 1.52  | -0.41 | -0.74 | -0.53 | -0.31 |
| Q3MHD2 | Protein LSM12 homolog                                             | LSM12    | -0.24 | 0.24 | 0.75  | 0.56  | -1.94 | -0.02 | 0.98  | 0.78  | 0.43  | -1.44 | -0.57 | 0.46  |
| P15882 | N-chimaerin                                                       | CHN1     | -0.24 | 0.50 | 0.16  | 0.31  | -1.50 | 1.18  | 0.51  | -0.22 | -1.22 | -1.10 | 1.41  | 0.49  |
| Q9H9G7 | Protein argonaute-3                                               | AGO3     | -0.24 | 0.29 | 0.63  | 1.40  | -1.55 | -0.53 | 0.44  | -1.32 | 0.73  | -0.91 | 0.38  | 0.72  |
| O75061 | Putative tyrosine-protein phosphatase auxilin                     | DNAJC6   | -0.24 | 0.65 | 0.11  | 1.70  | -0.60 | 0.56  | -0.95 | -0.23 | 1.19  | -1.74 | -0.09 | 0.05  |
| Q4KMP7 | TBC1 domain family member 10B                                     | TBC1D10B | -0.25 | 0.35 | -0.35 | 1.80  | -0.41 | 0.44  | -1.01 | -1.70 | -0.49 | 0.31  | 0.58  | 0.83  |
| Q8IZQ5 | Selenoprotein H                                                   | SELENOH  | -0.25 | 0.70 | 0.70  | -1.41 | -0.62 | 0.35  | 1.85  | 0.96  | -0.24 | -1.24 | -0.07 | -0.28 |
| O00273 | DNA fragmentation factor subunit alpha                            | DFFA     | -0.25 | 0.19 | -1.03 | 1.29  | 0.45  | 0.69  | -1.13 | -1.15 | -1.15 | 0.33  | 0.62  | 1.08  |
| P38935 | DNA-binding protein SMUBP-2                                       | IGMBP2   | -0.25 | 0.26 | 0.61  | -0.98 | -0.35 | -0.19 | 1.27  | 0.24  | 1.79  | -1.29 | -0.14 | -0.97 |
| P36507 | Dual specificity mitogen-activated protein kinase kinase 2        | MAP2K2   | -0.25 | 0.45 | 0.66  | 0.55  | -1.20 | 0.72  | -0.13 | 0.48  | 0.39  | -2.35 | 0.42  | 0.46  |
| Q9NQG5 | Regulation of nuclear pre-mRNA domain-containing protein 1B       | RPRD1B   | -0.25 | 0.28 | 0.66  | 0.30  | -1.28 | 1.04  | -0.33 | 0.79  | -1.19 | -1.53 | 0.93  | 0.62  |
| Q9NZC7 | WW domain-containing oxidoreductase                               | WWOX     | -0.25 | 0.35 | 1.04  | 1.11  | -1.01 | -0.61 | -0.06 | 1.59  | -0.66 | -1.14 | -0.83 | 0.57  |
| O15143 | Actin-related protein 2/3 complex subunit 1B                      | ARPC1B   | -0.25 | 0.28 | 1.57  | 0.82  | -0.21 | -0.31 | -1.48 | 0.81  | 0.80  | -1.38 | -0.58 | -0.03 |
| P38606 | V-type proton ATPase catalytic subunit A                          | ATP6V1A  | -0.25 | 0.80 | 0.87  | -0.28 | 0.35  | 0.66  | -0.62 | -0.92 | 1.37  | -0.36 | 0.84  | -1.92 |
| Q969M7 | NEDD8-conjugating enzyme UBE2F                                    | UBE2F    | -0.25 | 0.28 | -1.07 | -0.75 | 1.16  | 1.02  | 0.03  | -1.18 | -1.30 | 1.13  | 0.70  | 0.26  |
| O60502 | Protein O-GlcNAcase                                               | OGA      | -0.25 | 0.90 | 1.10  | 1.19  | -1.62 | 0.65  | -0.27 | -1.09 | 0.36  | 0.16  | 0.71  | -1.19 |
| O5J5P0 | FYVE, RhoGEF and PH domain-containing protein 3                   | FGD3     | -0.25 | 0.26 | 0.03  | -0.25 | 1.68  | -0.95 | -0.15 | 0.97  | 1.08  | -1.39 | -1.07 | 0.04  |
| AK7519 | Ankyrin repeat domain-containing protein 17                       | ANKRD17  | -0.25 | 0.14 | -0.95 | -1.05 | 0.69  | 1.08  | 0.43  | -1.46 | -1.07 | 0.66  | 1.00  | 0.68  |
| Q9UPY3 | Endoribonuclease Dicer                                            | DICER1   | -0.25 | 0.54 | 0.08  | -0.48 | 0.95  | -0.90 | 1.04  | 1.23  | -0.23 | -1.75 | 0.84  | -0.79 |
| P28676 | Grancalcin                                                        | GCA      | -0.25 | 0.34 | -1.21 | 0.75  | 0.63  | 0.19  | 0.10  | -1.43 | -1.54 | 0.77  | 0.94  | 0.80  |
| P36896 | Activin receptor type-1B                                          | ACVR1B   | -0.25 | 0.35 | 2.14  | -0.42 | -0.49 | -0.29 | -0.47 | -0.44 | -0.35 | -0.87 | 1.57  | -0.39 |
| Q9UHJ6 | Sedoheptakinsase                                                  | SHPK     | -0.25 | 0.33 | -0.08 | -0.17 | 0.31  | 0.75  | -0.36 | 0.72  | -0.47 | -2.44 | 0.85  | 0.88  |
| O75368 | SH3 domain-binding glutamic acid-rich-like protein                | SHBBGRL  | -0.25 | 0.34 | 0.24  | 0.05  | 0.35  | 0.34  | -0.51 | -0.40 | -2.35 | 1.58  | 0.28  | 0.43  |
| P15498 | Proto-oncogene vav                                                | VAV1     | -0.25 | 0.38 | 0.68  | 0.99  | -2.24 | 0.00  | 1.09  | -0.51 | -0.25 | -0.04 | 0.85  | -0.57 |
| Q8TCB0 | Interferon-induced protein 44                                     | IFI44    | -0.25 | 0.39 | 0.14  | -1.26 | 0.36  | 1.31  | -0.03 | 0.63  | -1.35 | 0.65  | 0.96  | -1.41 |
| P61086 | Ubiquitin-conjugating enzyme E2 K                                 | UBE2K    | -0.25 | 0.50 | 0.82  | -0.70 | 0.45  | -0.17 | 0.26  | -0.28 | -2.22 | 1.59  | 0.07  | 0.19  |
| P63279 | SUMO-conjugating enzyme UBC9                                      | UBE2I    | -0.25 | 0.48 | -0.83 | -0.06 | -0.91 | 0.78  | 1.65  | -1.52 | -0.88 | 0.63  | 0.50  | 0.65  |
| Q92995 | Ubiquitin carboxyl-terminal hydrolase 13                          | USP13    | -0.25 | 0.15 | 1.27  | -0.05 | 0.26  | -0.18 | -1.09 | 1.09  | 1.38  | -1.27 | -0.27 | -1.14 |
| P15311 | Ezrin                                                             | EZR      | -0.26 | 0.36 | -0.61 | -0.88 | -0.39 | -0.30 | 2.69  | -0.43 | -0.25 | 0.28  | -0.17 | 0.08  |
| Q96A49 | Synapse-associated protein 1                                      | SYAP1    | -0.26 | 0.28 | -0.24 | 0.83  | 0.48  | 1.20  | -1.89 | -0.08 | 0.62  | -1.17 | 0.90  | -0.65 |
| Q96590 | LysM and putative peptidoglycan-binding domain-containing protein | LYSMD1   | -0.26 | 0.35 | -1.25 | -0.24 | 0.92  | 0.86  | 0.20  | -0.92 | -1.78 | 0.54  | 0.84  | 0.85  |
| Q8WU76 | Sec1 family domain-containing protein 2                           | SCFD2    | -0.26 | 0.34 | -1.46 | 0.46  | 0.17  | 1.46  | -0.16 | -0.14 | -1.43 | -0.75 | 0.69  | 1.18  |
| Q9H2H8 | Peptidyl-prolyl cis-trans isomerase-like 3                        | PP1L3    | -0.26 | 0.46 | -0.46 | 1.64  | -0.85 | 0.72  | -0.45 | 0.66  | -0.46 | -1.84 | 0.73  | 0.31  |
| Q6PIU2 | Neutral cholesterol ester hydrolase 1                             | NCEH1    | -0.26 | 0.27 | 1.41  | 0.69  | -0.11 | -0.12 | -1.49 | 0.34  | 1.13  | -1.69 | -0.26 | 0.10  |
| Q9BVA0 | Katanin p80 WD40 repeat-containing subunit B1                     | KATNB1   | -0.26 | 0.84 | 1.20  | 0.72  | -0.97 | 0.53  | -0.47 | 0.56  | 0.40  | -2.25 | 0.28  | 0.01  |
| Q8N4C8 | Missshapen-like kinase 1                                          | MINK1    | -0.26 | 0.54 | -1.30 | 0.59  | 0.44  | 0.95  | 0.02  | -1.66 | -0.66 | -0.54 | 0.86  | 1.29  |
| P13667 | Protein disulfide-isomerase A4                                    | PDI4A    | -0.26 | 0.21 | -1.25 | 0.60  | 0.72  | 0.66  | -0.42 | -1.58 | -1.15 | 0.53  | 1.05  | 0.85  |
| Q15742 | NGF1-A-binding protein 2                                          | NAB2     | -0.26 | 0.38 | 2.05  | -0.19 | -1.12 | 0.26  | -0.48 | 0.84  | -0.75 | -1.30 | 0.23  | 0.46  |
| Q86YD1 | Prostate tumor-overexpressed gene 1 protein                       | PTOV1    | -0.26 | 0.74 | -0.54 | 0.03  | -0.68 | 2.55  | -0.44 | -0.13 | -0.30 | -0.89 | 0.73  | -0.34 |
| Q00839 | Heterogeneous nuclear ribonucleoprotein U                         | HNRNPJ   | -0.26 | 0.62 | 1.52  | -1.11 | -1.26 | 0.69  | 0.94  | 0.60  | -1.18 | -0.67 | 0.55  | -0.09 |
| O75037 | Kinesin-like protein KIF21B                                       | KIF21B   | -0.26 | 0.26 | 1.13  | 0.59  | -2.38 | 0.49  | 0.54  | 0.35  | -0.53 | -0.58 | 0.62  | -0.21 |
| Q96KG9 | N-terminal kinase-like protein                                    | SCYL1    | -0.26 | 0.41 | 0.80  | 1.21  | -0.17 | -0.97 | -0.32 | 0.96  | 1.19  | -0.72 | -1.70 | -0.27 |
| P13929 | Beta-enolase                                                      | ENO3     | -0.26 | 0.37 | 0.07  | -0.49 | -0.14 | -0.14 | 1.21  | -0.29 | -0.93 | 2.26  | -0.72 | -0.82 |
| Q8IZD9 | Dedicator of cytokinesis protein 3                                | DOCK3    | -0.26 | 0.20 | 0.77  | 0.65  | -1.15 | 0.41  | -0.40 | 1.07  | 1.05  | -1.79 | 0.29  | -0.89 |
| Q86YV0 | RAS protein activator like-3                                      | RASAL3   | -0.26 | 0.29 | 1.67  | 0.76  | -1.01 | -0.11 | -0.91 | 1.21  | 0.67  | -0.46 | -0.96 | -0.86 |
| P14415 | Sodium/potassium-transporting ATPase subunit beta-2               | ATP1B2   | -0.26 | 0.68 | -0.39 | 0.41  | 0.96  | 0.76  | -0.89 | 0.37  | -1.87 | 1.03  | 0.71  | -1.10 |
| Q9NVJ2 | ADP-ribosylation factor-like protein 8B                           | ARL8B    | -0.27 | 1.13 | 1.15  | 1.33  | -1.24 | 0.73  | -0.71 | -0.10 | 0.29  | -1.75 | -0.10 | 0.39  |
| Q9NSC2 | Sal-like protein 1                                                | SALL1    | -0.27 | 0.29 | 0.49  | -0.74 | -0.96 | 0.09  | 1.51  | 1.18  | 1.09  | -1.05 | -0.77 | -0.85 |
| Q9NRR5 | Ubiquilin-4                                                       | UBQLM4   | -0.27 | 0.35 | 1.46  | -0.76 | 1.26  | -0.61 | -0.88 | -0.71 | -0.83 | 1.21  | 0.58  | -0.73 |
| Q4AE62 | Glycosyltransferase-like domain-containing protein 1              | GTDC1    | -0.27 | 0.30 | 2.17  | -0.44 | -0.55 | -0.32 | -0.46 | 1.56  | -0.40 | -0.69 | -0.46 | -0.42 |
| Q9P2K5 | Myelin expression factor 2                                        | MYEF2    | -0.27 | 0.35 | 1.13  | -0.95 | -0.41 | 0.32  | 0.39  | 1.02  | -0.68 | -2.00 | 0.30  | 0.88  |
| Q9NNW7 | Thioredoxin reductase 2, mitochondrial                            | TXNRD2   | -0.27 | 0.50 | -0.40 | -0.05 | 1.55  | -0.27 | -0.18 | -0.24 | -1.91 | 0.68  | -0.55 | 1.36  |
| Q7Z739 | YTH domain-containing family protein 3                            | YTHDF3   | -0.27 | 0.31 | -0.06 | -0.91 | -1.11 | 0.98  | 1.54  | -0.04 | 0.77  | -1.24 | -0.81 | 0.90  |
| Q8TF74 | WAS/WASL-interacting protein family member 2                      | WIPF2    | -0.27 | 0.76 | -0.71 | 1.04  | -0.84 | -0.35 | 1.79  | 0.45  | -1.71 | 0.39  | -0.23 | 0.19  |
| Q9Y6D5 | Brefeldin A-inhibited guanine nucleotide-exchange protein 2       | ARFGF2   | -0.27 | 0.54 | 0.55  | 0.08  | -1.17 | 1.87  | -0.64 | -1.30 | 0.33  | -0.80 | 0.97  | 0.11  |
| P62899 | 60S ribosomal protein L31                                         | RPL31    | -0.27 | 0.65 | -0.22 | -0.80 | 1.91  | 0.27  | -0.35 | -1.12 | 0.52  | -1.22 | -0.18 | 1.19  |
| Q15286 | Ras-related protein Rab-35                                        | RAB35    | -0.27 | 0.91 | 0.06  | 0.57  | 0.11  | 0.52  | -0.15 | -2.56 | 0.08  | -0.41 | 0.84  | 0.95  |
| Q14004 | Cyclin-dependent kinase 13                                        | CDK13    | -0.27 | 0.50 | -2.21 | 0.46  | 0.85  | 0.74  | 0.82  | -0.13 | -0.02 | -1.17 | 0.76  | -0.09 |
| Q16566 | Calcium/calmodulin-dependent protein kinase type IV               | CAMK4    | -0.27 | 0.53 | 0.91  | -0.05 | -1.68 | 0.86  | 0.63  | 0.50  | 0.68  | -1.80 | 0.34  | -0.39 |
| P01024 | Complement C3                                                     | C3       | -0.27 | 0.34 | -1.41 | -0.10 | 0.28  | -0.16 | 1.84  | -1.30 | -0.83 | 0.94  | 0.36  | 0.37  |
| P21741 | Midkine                                                           | MDK      | -0.27 | 0.45 | 0.66  | 1.08  | -0.70 | -0.49 | 0.04  | 1.41  | -0.78 | 1.13  | -1.09 | -1.27 |
| Q9BU76 | Multiple myeloma tumor-associated protein 2                       | MMTAG2   | -0.27 | 0.39 | 1.31  | -1.33 | -0.76 | -0.52 | 1.83  | 0.66  | 0.28  | -0.68 | -0.45 | -0.45 |
| P31327 | Carbamoyl-phosphate synthase [ammonia], mitochondrial             | CPS1     | -0.27 | 0.22 | -0.86 | -0.21 | 2.27  | 0.21  | -1.09 | -0.29 | -1.10 | 0.64  | 0.36  | 0.08  |
| O95466 | Formin-like protein 1                                             | FMNL1    | -0.27 | 0.26 | 1.39  | 0.52  | 0.83  | -0.43 | -1.95 | 0.68  | -0.17 | -1.14 | -0.24 | 0.50  |



|        |                                                               |          |       |      |       |       |       |       |       |       |       |       |       |       |
|--------|---------------------------------------------------------------|----------|-------|------|-------|-------|-------|-------|-------|-------|-------|-------|-------|-------|
| P61328 | Fibroblast growth factor 12                                   | FGF12    | -0.27 | 0.79 | -0.29 | 1.76  | 0.30  | 0.84  | -1.65 | -0.38 | -1.07 | -0.62 | 0.43  | 0.68  |
| Q14849 | StAR-related lipid transfer protein 3                         | STAR3    | -0.27 | 0.59 | 0.62  | -0.67 | 1.24  | 0.48  | -0.93 | 1.26  | -0.90 | -1.35 | 0.92  | -0.68 |
| Q9NRZ5 | 1-acyl-sn-glycerol-3-phosphate acyltransferase delta          | AGPAT4   | -0.27 | 0.39 | 2.47  | -0.77 | -0.04 | 0.07  | -1.19 | 0.20  | 0.42  | -0.73 | -0.33 | -0.09 |
| P78509 | Reelin                                                        | RELN     | -0.27 | 0.30 | 1.09  | -1.14 | -1.25 | 0.86  | 0.85  | 0.93  | 0.86  | -0.60 | -0.44 | -1.15 |
| Q14980 | Nuclear mitotic apparatus protein 1                           | NUMA1    | -0.27 | 0.20 | -1.38 | 0.66  | 0.27  | 0.26  | 0.48  | -1.99 | -0.51 | 1.27  | 0.46  | 0.48  |
| Q6P1X6 | UPF0598 protein C8orf82                                       | C8orf82  | -0.27 | 0.29 | -0.57 | 1.33  | -0.79 | 1.14  | -0.72 | -0.64 | -0.73 | -1.07 | 1.40  | 0.64  |
| Q81WE2 | Protein NOX2                                                  | FAM114A1 | -0.27 | 0.44 | 0.52  | 1.15  | -1.03 | 0.65  | -0.71 | -0.73 | -0.77 | -1.26 | 0.69  | 1.49  |
| Q16851 | UTP--glucose-1-phosphate uridylyltransferase                  | UGP2     | -0.27 | 2.11 | 0.04  | 1.08  | 0.15  | 0.60  | 0.20  | -2.18 | -0.87 | 0.92  | 0.77  | -0.70 |
| Q9ULU4 | Protein kinase C-binding protein 1                            | ZMYND8   | -0.27 | 0.56 | 0.65  | -1.99 | 0.79  | 0.26  | 1.00  | 0.45  | 0.12  | -1.55 | 0.49  | -0.23 |
| P62913 | 60S ribosomal protein L11                                     | RPL11    | -0.27 | 1.05 | 0.91  | -0.33 | 0.73  | 0.37  | -0.46 | -2.13 | -1.07 | 0.81  | 0.31  | 0.86  |
| O95777 | U6 snRNA-associated Sm-like protein LSM8                      | LSM8     | -0.27 | 0.43 | 1.96  | -0.14 | -0.71 | -0.07 | -0.49 | 0.33  | -1.74 | 1.02  | -0.39 | 0.22  |
| Q9UPW0 | Forkhead box protein J3                                       | FOXJ3    | -0.27 | 0.80 | -0.41 | 0.84  | 0.42  | -0.84 | 0.96  | 1.25  | 0.81  | -1.53 | -1.31 | -0.18 |
| Q9NP79 | Vacuolar protein sorting-associated protein VTA1 homolog      | VTA1     | -0.27 | 0.47 | -0.01 | 1.97  | -1.19 | 0.42  | -0.57 | 0.12  | 0.31  | -1.70 | 0.33  | 0.33  |
| O00182 | Galectin-9                                                    | LGALS9   | -0.27 | 0.34 | 0.10  | 0.99  | -1.87 | 0.63  | 0.61  | 0.25  | -1.69 | -0.23 | 0.74  | 0.47  |
| Q96QG7 | Myotubularin-related protein 9                                | MTMR9    | -0.27 | 0.69 | -1.62 | 0.97  | -0.36 | 0.88  | 0.99  | -0.75 | 0.22  | 0.17  | 0.94  | -1.42 |
| P52209 | 6-phosphogluconate dehydrogenase, decarboxylating             | PGD      | -0.27 | 0.61 | 0.01  | -0.76 | 0.85  | 0.09  | 0.59  | -0.27 | -2.02 | 1.69  | 0.31  | -0.50 |
| P52789 | Hexokinase-2                                                  | HK2      | -0.27 | 0.38 | 1.80  | -0.56 | 1.26  | -1.03 | -0.95 | 0.61  | 0.33  | -0.64 | 0.19  | -1.00 |
| P42765 | 3-ketoacyl-CoA thiolase, mitochondrial                        | ACAA2    | -0.27 | 0.55 | 0.65  | -0.95 | 1.99  | 0.00  | -0.98 | -0.11 | -1.33 | 0.85  | 0.30  | -0.41 |
| Q9BZ23 | Pantothenate kinase 2, mitochondrial                          | PANK2    | -0.27 | 0.52 | 0.84  | 1.42  | 0.66  | -1.12 | -1.14 | -0.37 | 1.04  | -0.67 | -1.17 | 0.51  |
| Q9BZV1 | UBX domain-containing protein 6                               | UBXN6    | -0.27 | 0.92 | 1.19  | 0.36  | -1.20 | 0.75  | -0.02 | -0.12 | -1.60 | 1.43  | 0.11  | -0.90 |
| Q9BZH6 | WD repeat-containing protein 11                               | WDR11    | -0.28 | 0.26 | 0.98  | 0.51  | -1.19 | 0.57  | -0.51 | 1.10  | 0.79  | -1.47 | -1.25 | 0.47  |
| P15954 | Cytochrome c oxidase subunit 7C, mitochondrial                | COX7C    | -0.28 | 0.33 | -0.23 | -0.53 | 2.17  | -0.38 | -0.58 | -0.43 | -0.22 | -0.87 | -0.44 | 1.51  |
| Q9UKG1 | DCC-interacting protein 13-alpha                              | APPL1    | -0.28 | 0.74 | 0.43  | 1.59  | -0.69 | 0.03  | -0.46 | 0.13  | 0.33  | -2.24 | 0.24  | 0.63  |
| Q9BXP2 | Solute carrier family 12 member 9                             | SLC12A9  | -0.28 | 0.36 | -0.73 | 0.54  | -1.00 | 1.27  | 0.41  | -0.77 | -0.86 | -1.15 | 1.36  | 0.94  |
| Q9Y2A7 | Nck-associated protein 1                                      | NCKAP1   | -0.28 | 0.68 | -1.02 | 0.68  | -0.72 | 0.13  | 1.78  | -1.30 | -0.61 | 1.29  | -0.05 | -0.17 |
| P04632 | Calpain small subunit 1                                       | CAPNS1   | -0.28 | 0.63 | -0.65 | 0.76  | 1.02  | 0.53  | -0.87 | -1.52 | -1.31 | 1.27  | 0.36  | 0.40  |
| Q96RY7 | Intraflagellar transport protein 140 homolog                  | IFT140   | -0.28 | 0.59 | -0.06 | -1.38 | 0.80  | 0.53  | 0.86  | -1.05 | 1.23  | -1.60 | 0.44  | 0.24  |
| Q9H598 | Vesicular inhibitory amino acid transporter                   | SLC32A1  | -0.28 | 0.36 | 1.36  | 1.63  | -0.61 | -0.96 | -0.93 | 0.51  | 0.65  | -1.23 | -0.36 | -0.05 |
| P17987 | T-complex protein 1 subunit alpha                             | TCP1     | -0.28 | 2.08 | 1.35  | -0.71 | 1.71  | 0.43  | -0.80 | -0.97 | -0.59 | -0.76 | 0.87  | -0.53 |
| O95747 | Serine/threonine-protein kinase OSR1                          | OSR1     | -0.28 | 1.13 | -0.18 | 0.51  | 0.41  | -0.08 | 0.66  | -0.67 | -2.32 | -0.28 | 0.59  | 1.37  |
| Q8N999 | Uncharacterized protein C12orf29                              | C12orf29 | -0.28 | 0.47 | 0.48  | -0.56 | -0.79 | 1.97  | -0.50 | -0.40 | -0.50 | -0.91 | 1.53  | -0.33 |
| P18124 | 60S ribosomal protein L7                                      | RPL7     | -0.28 | 0.40 | -1.11 | -1.21 | 0.68  | 0.56  | 1.62  | -1.04 | -0.89 | 0.67  | 0.77  | -0.04 |
| P23381 | Tryptophan--tRNA ligase, cytoplasmic                          | WARS     | -0.28 | 0.26 | -1.37 | -0.31 | 0.73  | -0.03 | 1.33  | -0.62 | -0.25 | 1.63  | 0.14  | -1.26 |
| P61020 | Ras-related protein Rab-5B                                    | RAB5B    | -0.28 | 1.63 | -0.82 | -0.85 | 1.65  | 0.93  | 0.75  | -1.38 | -0.62 | -0.40 | 0.98  | -0.24 |
| P35611 | Alpha-adducin                                                 | ADD1     | -0.28 | 2.75 | 1.48  | 0.78  | 0.27  | 0.65  | -0.85 | -0.90 | 0.39  | -0.46 | 0.52  | -1.88 |
| Q7Z460 | CLIP-associating protein 1                                    | CLASP1   | -0.28 | 0.26 | 0.48  | 0.52  | -0.22 | 0.08  | -0.50 | 0.96  | 0.72  | -2.54 | -0.07 | 0.56  |
| Q9Y4P8 | WD repeat domain phosphoinositide-interacting protein 2       | WIPI2    | -0.28 | 0.75 | 0.92  | -0.01 | -0.70 | 1.06  | -0.35 | 0.35  | -0.11 | -2.34 | 0.82  | 0.36  |
| Q9NRN7 | L-aminoadipate-semialdehyde dehydrogenase-phosphopantetheinyl | AASDPPT  | -0.28 | 0.76 | -0.47 | 0.53  | 0.59  | 1.21  | -0.94 | 0.29  | -1.20 | -1.66 | 1.12  | 0.51  |
| Q00688 | Peptidyl-prolyl cis-trans isomerase FKBP3                     | FKBP3    | -0.28 | 0.62 | 0.47  | -0.87 | 1.59  | -0.36 | -0.04 | -1.99 | 1.17  | -0.08 | 0.06  | 0.06  |
| O14828 | Secretory carrier-associated membrane protein 3               | SCAMP3   | -0.28 | 0.22 | -1.50 | 0.23  | 0.23  | 0.67  | 0.69  | -1.17 | -1.53 | 0.54  | 0.85  | 1.00  |
| P54252 | Ataxin-3                                                      | ATXN3    | -0.28 | 0.88 | -0.69 | 1.91  | -0.09 | 0.39  | -0.48 | -1.16 | -1.47 | 0.79  | 0.51  | 0.30  |
| P51659 | Peroxisomal multifunctional enzyme type 2                     | HSD17B4  | -0.28 | 0.91 | 1.68  | -0.35 | -1.06 | 0.33  | 0.47  | 0.97  | -0.94 | -1.61 | 0.47  | 0.04  |
| P61018 | Ras-related protein Rab-4B                                    | RAB4B    | -0.28 | 0.44 | -0.02 | 1.81  | -0.22 | 0.68  | -1.67 | 0.31  | -1.30 | -0.49 | 0.43  | 0.48  |
| P53355 | Death-associated protein kinase 1                             | DAPK1    | -0.28 | 0.34 | -0.14 | -0.93 | -0.87 | 1.25  | 1.15  | -1.07 | -1.06 | -0.34 | 1.06  | 0.96  |
| Q02952 | A-kinase anchor protein 12                                    | AKAP12   | -0.29 | 0.71 | 0.01  | 2.07  | 1.00  | -0.78 | -1.40 | -0.54 | 0.32  | -0.84 | -0.06 | 0.22  |
| Q99683 | Mitogen-activated protein kinase kinase kinase 5              | MAP3K5   | -0.29 | 0.46 | -1.33 | 0.72  | 0.63  | 1.03  | -0.44 | -0.82 | -1.59 | -0.11 | 1.06  | 0.85  |
| Q9GZ53 | WD repeat-containing protein 61                               | WDR61    | -0.29 | 0.59 | 0.51  | 0.78  | -0.16 | 0.56  | -0.94 | 0.64  | -0.17 | -2.40 | 0.45  | 0.72  |
| O60825 | 6-phosphofructo-2-kinase/fructose-2,6-bisphosphatase 2        | PFKFB2   | -0.29 | 0.35 | -0.92 | 1.05  | 0.05  | 0.77  | -0.47 | -1.03 | -1.32 | -0.44 | 0.63  | 1.68  |
| Q9UJV9 | Probable ATP-dependent RNA helicase DDX41                     | DDX41    | -0.29 | 0.23 | 1.94  | -0.90 | -0.31 | -0.31 | -0.10 | 1.56  | -0.90 | -0.35 | 0.25  | -0.89 |
| Q9UI10 | Translation initiation factor eIF-2B subunit delta            | EIF2B4   | -0.29 | 0.29 | 1.09  | 0.60  | -1.37 | 0.21  | -0.13 | 1.40  | -0.01 | -1.85 | 0.26  | -0.20 |
| Q14699 | Raftlin                                                       | RFTN1    | -0.29 | 0.29 | 0.38  | 0.41  | -0.28 | 0.56  | -0.67 | 1.43  | -0.13 | -2.36 | 0.28  | 0.37  |
| P06756 | Integrin alpha-V                                              | ITGAV    | -0.29 | 0.33 | -0.74 | 1.02  | -1.07 | 0.71  | 0.54  | -0.85 | -0.84 | -1.12 | 1.11  | 1.25  |
| P82987 | ADAMTS-like protein 3                                         | ADAMTSL3 | -0.29 | 0.32 | 1.32  | -0.93 | -1.11 | 0.04  | 1.12  | 0.95  | 0.83  | -1.24 | -0.87 | -0.10 |
| O15020 | Spectrin beta chain, non-erythrocytic 2                       | SPTBN2   | -0.29 | 0.44 | -2.06 | 0.57  | 0.37  | 1.10  | 0.60  | -0.73 | 0.22  | -1.17 | 0.85  | 0.26  |
| Q9UN81 | LINE-1 retrotransposable element ORF1 protein                 | L1RE1    | -0.29 | 0.34 | -2.19 | 0.57  | 0.85  | 0.17  | 1.06  | -0.57 | 0.85  | -0.95 | 0.01  | 0.21  |
| Q9P0K8 | Forkhead box protein J2                                       | FOXJ2    | -0.29 | 1.12 | 0.29  | -0.35 | -0.69 | 2.59  | -0.55 | 0.00  | -0.31 | -1.02 | 0.32  | -0.28 |
| Q96BY2 | Modulator of apoptosis 1                                      | MOAP1    | -0.29 | 1.45 | 0.19  | -0.36 | -0.46 | 2.58  | -0.39 | -0.09 | -0.05 | -1.30 | -0.27 | 0.14  |
| Q64LD2 | WD repeat-containing protein 25                               | WDR25    | -0.29 | 0.36 | 0.86  | -0.72 | 1.81  | -0.73 | -0.75 | 0.71  | -0.75 | 1.07  | -0.80 | -0.71 |
| P39687 | Acidic leucine-rich nuclear phosphoprotein 32 family member A | ANP32A   | -0.29 | 0.44 | 0.86  | 0.08  | 0.85  | -0.78 | -0.43 | -1.41 | -0.97 | 1.93  | 0.13  | -0.26 |
| Q8TDZ2 | [F-actin]-monooxygenase MICAL1                                | MICAL1   | -0.29 | 0.57 | -0.36 | 0.85  | -0.13 | 0.13  | 0.25  | -0.91 | -1.69 | 2.01  | 0.32  | -0.47 |
| Q16204 | Coiled-coil domain-containing protein 6                       | CCDC6    | -0.29 | 0.71 | 2.20  | -1.14 | -0.26 | 0.04  | 0.04  | 0.28  | 1.00  | -0.84 | -0.37 | -0.95 |
| Q8N8R5 | UPF0565 protein C2orf69                                       | C2orf69  | -0.29 | 0.32 | -0.59 | -0.75 | -0.92 | 1.46  | 1.22  | -0.62 | -0.59 | -1.02 | 1.24  | 0.56  |
| Q86VN1 | Vacuolar protein-sorting-associated protein 36                | VPS36    | -0.29 | 0.39 | 0.46  | 0.13  | -1.53 | 0.08  | 1.37  | 0.75  | 0.28  | -1.93 | -0.01 | 0.39  |
| Q9NWT6 | Hypoxia-inducible factor 1-alpha inhibitor                    | HIF1AN   | -0.29 | 0.29 | 0.52  | 0.32  | 0.69  | 0.80  | -1.92 | 0.17  | -0.76 | -1.40 | 0.83  | 0.76  |
| O14810 | Complexin-1                                                   | CPX1     | -0.29 | 0.47 | -0.09 | -0.35 | -0.46 | -0.48 | 1.98  | 0.08  | -0.42 | 1.38  | -1.55 | -0.09 |
| Q12959 | Disks large homolog 1                                         | DLG1     | -0.29 | 0.56 | -0.49 | 0.16  | 0.05  | 0.85  | 0.16  | -2.44 | -0.54 | 0.70  | 0.64  | 0.92  |
| P26378 | ELAV-like protein 4                                           | ELAVL4   | -0.29 | 1.05 | -0.05 | -0.06 | 0.38  | 0.50  | 0.47  | -2.18 | -0.73 | -0.04 | -0.04 | 1.76  |
| Q9NTJ5 | Phosphatidylinositol phosphatase SAC1                         | SACM1L   | -0.29 | 1.44 | -0.18 | 1.26  | -1.02 | 0.41  | 1.04  | 0.07  | -1.78 | -0.99 | 0.23  | 0.95  |
| P63167 | Dynein light chain 1, cytoplasmic                             | DYNLL1   | -0.29 | 2.09 | 1.67  | 0.25  | -0.57 | 0.95  | -0.33 | -0.74 | -0.40 | -1.85 | 0.81  | 0.21  |
| Q9NZ56 | Formin-2                                                      | FMN2     | -0.29 | 0.39 | -0.53 | 2.05  | -1.15 | 0.89  | -0.74 | -0.97 | -0.56 | -0.08 | 0.57  | 0.52  |
| P09543 | 2',3'-cyclic-nucleotide 3'-phosphodiesterase                  | CNP      | -0.29 | 0.38 | -0.99 | -0.91 | 1.54  | 0.57  | 0.29  | -1.37 | -0.37 | 1.15  | 0.78  | -0.69 |
| Q9Y223 | Bifunctional UDP-N-acetylglucosamine 2-epimerase/N-acetylmann | GNE      | -0.30 | 0.49 | -0.17 | -0.42 | -0.67 | -0.42 | 2.31  | -0.31 | -0.45 | -0.76 | -0.45 | 1.33  |
| Q7L014 | Probable ATP-dependent RNA helicase DDX46                     | DDX46    | -0.30 | 0.60 | -0.50 | 0.29  | 0.65  | 0.45  | -0.11 | -0.52 | -2.39 | 0.11  | 1.02  | 1.01  |
| Q8TE77 | Protein phosphatase Slingshot homolog 3                       | SSH3     | -0.30 | 0.36 | -0.01 | 0.61  | -1.13 | 0.19  | 0.82  | 0.40  | 1.09  | -1.64 | 0.96  | -1.29 |
| Q6PUV4 | Complexin-2                                                   | CPX2     | -0.30 | 0.26 | -0.26 | 0.70  | -1.35 | -0.60 | 1.88  | -0.27 | -0.41 | 1.32  | -0.15 | -0.85 |
| Q86T10 | TBC1 domain family member 1                                   | TBC1D1   | -0.30 | 0.35 | 1.15  | 0.51  | -1.65 | 0.80  | -0.33 | 0.53  | -1.63 | -0.17 | -0.18 | 0.98  |
| O94925 | Glutaminase kidney isoform, mitochondrial                     | GLS      | -0.30 | 0.37 | -0.47 | -0.58 | 1.80  | -0.19 | -0.07 | -0.97 | 1.48  | -1.37 | -0.06 | 0.42  |
| P07311 | Acylphosphatase-1                                             | ACYP1    | -0.30 | 2.75 | 0.94  | -0.35 | 1.67  | -0.54 | 0.61  | -1.80 | -0.65 | 0.55  | 0.26  | -0.69 |
| Q9ULU8 | Calcium-dependent secretion activator 1                       | CADPS    | -0.30 | 0.48 | -0.20 | 1.88  | 0.26  | -0.20 | -1.11 | -0.03 | 1.25  | -1.55 | -0.31 | 0.01  |
| Q01518 | Adenylyl cyclase-associated protein 1                         | CAP1     | -0.30 | 1.28 | 0.16  | 1.62  | -0.46 | 0.70  | -0.63 | 0.57  | -1.94 | -0.12 | 0.81  | -0.71 |
| O60689 | Endothelial differentiation-related factor 1                  | EDF1     | -0.30 | 0.88 | 1.63  | -0.33 | 0.99  | -0.85 | -0.41 | 0.43  | 1.00  | -1.63 | -0.67 | -0.16 |
| Q9BZF3 | Oxysterol-binding protein-related protein 6                   | OSBPL6   | -0.30 | 0.31 | 0.76  | 0.40  | -1.78 | 0.80  | 0.24  | 0.24  | 0.44  | -1.90 | 0.76  | 0.04  |
| Q24JP5 | Transmembrane protein 132A                                    | TMEM132A | -0.30 | 0.52 | -1.22 | 1.21  | 0.65  | 1.12  | -1.08 | -0.41 | -0.11 | 0.07  | 1.11  | -1.33 |

|        |                                                                   |           |       |      |       |       |       |       |       |       |       |       |       |       |
|--------|-------------------------------------------------------------------|-----------|-------|------|-------|-------|-------|-------|-------|-------|-------|-------|-------|-------|
| Q2LD37 | Transmembrane protein KIAA1109                                    | KIAA1109  | -0.30 | 0.38 | 0.09  | 1.97  | -1.07 | 0.45  | -0.93 | 0.85  | 0.52  | -1.32 | -0.29 | -0.27 |
| Q15014 | Mortality factor 4-like protein 2                                 | MORF4L2   | -0.30 | 0.24 | -0.99 | 1.25  | -1.19 | 0.99  | 0.27  | -1.04 | -1.11 | -0.02 | 0.88  | 0.96  |
| P26583 | High mobility group protein B2                                    | HMG82     | -0.30 | 0.48 | -1.37 | 0.14  | 1.56  | 0.77  | -0.48 | -1.32 | -1.04 | 0.55  | 0.71  | 0.48  |
| O00203 | AP-3 complex subunit beta-1                                       | AP3B1     | -0.30 | 0.28 | -1.74 | 0.40  | 0.24  | 0.95  | 0.53  | -1.72 | 0.36  | -0.34 | 0.18  | 1.14  |
| Q96525 | 2-aminoethanethiol dioxygenase                                    | ADO       | -0.30 | 0.35 | 0.45  | 1.14  | -0.88 | 0.37  | -0.61 | -0.89 | -1.74 | 0.25  | 0.45  | 1.45  |
| O15027 | Protein transport protein Sec16A                                  | SEC16A    | -0.30 | 0.59 | 1.21  | 0.40  | -2.12 | 0.75  | 0.52  | -0.26 | 0.38  | -1.28 | -0.01 | 0.41  |
| P51116 | Fragile X mental retardation syndrome-related protein 2           | FXR2      | -0.30 | 0.43 | 1.13  | -0.53 | -1.64 | 0.78  | 0.83  | 0.00  | 0.31  | -1.71 | 0.61  | 0.21  |
| O14920 | Inhibitor of nuclear factor kappa-B kinase subunit beta           | IKBKB     | -0.30 | 0.41 | 0.95  | -0.54 | 0.33  | -0.61 | 0.42  | 0.07  | -1.77 | 1.87  | -0.71 | -0.01 |
| O15075 | Serine/threonine-protein kinase DCLK1                             | DCLK1     | -0.30 | 0.52 | 0.56  | 0.50  | -1.23 | 0.80  | 0.06  | 0.66  | 0.93  | -2.17 | 0.31  | -0.41 |
| Q9BRT6 | Protein LLP homolog                                               | LLPH      | -0.30 | 0.31 | -0.63 | -0.71 | -0.19 | -0.10 | 2.06  | -0.69 | -0.71 | 1.53  | 0.11  | -0.67 |
| Q00610 | Clathrin heavy chain 1                                            | CLTC      | -0.31 | 0.77 | -0.53 | 1.63  | -1.27 | 1.74  | -0.61 | -0.47 | 0.26  | -0.86 | 0.12  | 0.00  |
| Q96KP1 | Exocyst complex component 2                                       | EXOC2     | -0.31 | 0.49 | -1.37 | 0.65  | -1.20 | 1.21  | 1.36  | -0.74 | -0.51 | -0.38 | 1.00  | -0.01 |
| Q9Y305 | Acyl-coenzyme A thioesterase 9, mitochondrial                     | ACOT9     | -0.31 | 0.85 | -0.04 | 0.04  | 1.15  | -1.11 | 0.98  | -0.25 | -2.11 | 0.75  | -0.02 | 0.63  |
| Q86YR7 | Probable guanine nucleotide exchange factor MCF2L2                | MCF2L2    | -0.31 | 0.40 | 0.62  | 0.97  | 0.90  | -0.93 | -1.04 | -0.85 | -0.93 | 0.69  | 1.44  | -0.89 |
| Q8N0X4 | Citramalyl-CoA lyase, mitochondrial                               | CLYBL     | -0.31 | 0.33 | 1.14  | -0.93 | 1.42  | -0.25 | -0.94 | 0.07  | 1.06  | -1.29 | -0.87 | 0.57  |
| Q9BSU1 | UPF0183 protein C16orf70                                          | C16orf70  | -0.31 | 0.22 | 0.98  | 0.66  | -0.29 | 0.02  | -1.05 | 0.95  | 1.03  | -2.11 | -0.09 | -0.09 |
| Q96199 | Succinate--CoA ligase [GDP-forming] subunit beta, mitochondrial   | SUCLG2    | -0.31 | 0.31 | 0.57  | -0.15 | 1.63  | -0.71 | -0.92 | -0.36 | 0.74  | -1.23 | -0.87 | 1.31  |
| Q15751 | Probable E3 ubiquitin-protein ligase HERC1                        | HERC1     | -0.31 | 0.22 | 1.42  | -0.35 | -1.43 | 0.47  | 0.19  | 1.42  | -1.23 | -0.04 | 0.44  | -0.90 |
| O00443 | Phosphatidylinositol 4-phosphate 3-kinase C2 domain-containing s  | PIK3C2A   | -0.31 | 0.87 | -0.61 | 0.14  | 0.80  | 1.15  | -0.44 | -2.00 | 0.97  | -0.76 | 0.95  | -0.19 |
| Q96EV8 | Dysbindin                                                         | DTNBP1    | -0.31 | 0.72 | -0.15 | 2.29  | -0.51 | -0.40 | -0.35 | -0.26 | 1.29  | -1.04 | -0.44 | -0.44 |
| Q14168 | MAGUK p55 subfamily member 2                                      | MPP2      | -0.31 | 1.14 | 0.32  | 1.20  | -0.71 | 0.20  | 0.27  | -1.26 | -0.57 | -1.40 | 0.23  | 1.71  |
| Q9ULD0 | 2-oxoglutarate dehydrogenase-like, mitochondrial                  | OGDHIL    | -0.31 | 0.53 | 0.54  | -1.25 | 0.05  | 0.57  | 0.78  | -1.61 | 1.62  | -0.97 | 0.05  | 0.23  |
| O14976 | Cyclin-G-associated kinase                                        | GAK       | -0.31 | 0.52 | 1.18  | 0.93  | -2.21 | 0.41  | 0.38  | -0.51 | 0.34  | -0.99 | 0.42  | 0.05  |
| Q9Y230 | RuvB-like 2                                                       | RUVBL2    | -0.31 | 0.26 | 1.54  | -0.97 | -1.00 | 0.15  | 0.63  | 0.70  | 1.21  | -1.17 | -0.12 | -0.97 |
| Q99418 | Cytohesin-2                                                       | CYTH2     | -0.31 | 1.06 | -0.53 | 1.56  | -0.57 | 0.22  | 0.52  | -1.68 | -1.07 | 0.29  | 0.00  | 1.26  |
| P60866 | 40S ribosomal protein S20                                         | RPS20     | -0.31 | 2.53 | 1.17  | -0.51 | 0.42  | 0.28  | 0.91  | -0.40 | -2.09 | 1.00  | -0.86 | 0.09  |
| Q81WV7 | E3 ubiquitin-protein ligase UBR1                                  | UBR1      | -0.31 | 0.75 | 0.20  | -0.78 | -0.64 | 0.57  | 1.56  | -1.38 | -0.08 | -0.97 | 0.26  | -1.50 |
| Q9NYF8 | Bcl-2-associated transcription factor 1                           | BCLAF1    | -0.31 | 1.18 | -0.68 | -0.46 | -0.65 | 1.59  | 1.52  | 0.19  | -0.37 | -1.40 | 0.81  | -0.55 |
| Q15545 | Transcription initiation factor TFIID subunit 7                   | TAI7      | -0.31 | 0.42 | -0.57 | 1.31  | -0.97 | 0.55  | 0.25  | -0.74 | -0.85 | -1.19 | 0.63  | 1.60  |
| Q9Y4B6 | DDb1- and CUL4-associated factor 1                                | DCAF1     | -0.31 | 0.29 | 1.24  | 0.48  | -1.29 | 0.01  | -0.04 | 1.66  | -1.02 | -1.29 | 0.00  | 0.26  |
| P61019 | Ras-related protein Rab-2A                                        | RAB2A     | -0.31 | 1.37 | 0.59  | 1.96  | -0.72 | 0.28  | -0.64 | -1.46 | 0.93  | -0.72 | 0.26  | -0.48 |
| Q81WV6 | Rho GTPase-activating protein 12                                  | ARHGAP12  | -0.31 | 0.36 | -1.11 | -0.30 | 0.12  | 0.48  | 1.29  | -0.61 | -1.92 | 1.05  | 0.75  | 0.26  |
| Q9Y6W3 | Calpain-7                                                         | CAPN7     | -0.31 | 0.40 | 0.37  | 0.70  | -1.53 | 1.04  | -0.06 | 0.17  | -1.33 | -1.17 | 0.65  | 1.16  |
| Q16543 | Hsp90 co-chaperone Cdc37                                          | CDC37     | -0.32 | 2.21 | -0.11 | 2.21  | -0.91 | -0.10 | 0.99  | -0.75 | 0.57  | -0.70 | -0.91 | -0.30 |
| Q8NEZ3 | WD repeat-containing protein 19                                   | WDR19     | -0.32 | 0.38 | 0.72  | -1.26 | -0.15 | 0.48  | 0.71  | -0.78 | 0.15  | -1.86 | 1.18  | 0.80  |
| O60313 | Dynamin-like 120 kDa protein, mitochondrial                       | OPA1      | -0.32 | 1.30 | -0.64 | 1.11  | -0.86 | -1.29 | 1.41  | -0.92 | -1.17 | 0.86  | -0.28 | 0.09  |
| Q7Z6E9 | E3 ubiquitin-protein ligase RBBP6                                 | RBBP6     | -0.32 | 0.26 | -0.62 | 0.17  | -0.96 | 0.33  | 1.43  | -0.82 | 1.88  | -1.02 | 0.12  | -0.51 |
| P0COL4 | Complement C4-A                                                   | C4A       | -0.32 | 0.21 | -0.73 | -0.48 | 1.08  | 0.34  | 0.09  | -0.31 | -2.16 | 1.35  | 0.51  | 0.31  |
| P32418 | Sodium/calcium exchanger 1                                        | SLC8A1    | -0.32 | 0.67 | -1.00 | 1.03  | -0.57 | 0.64  | 0.73  | 0.22  | 0.80  | -2.10 | -0.38 | 0.64  |
| Q9NZI7 | Upstream-binding protein 1                                        | UBP1      | -0.32 | 0.31 | -0.65 | -0.68 | -0.81 | 1.27  | 1.31  | -0.72 | 0.57  | -1.01 | 1.37  | -0.64 |
| Q6P1M3 | LLGL scribble cell polarity complex component 2                   | LLGL2     | -0.32 | 0.45 | -0.25 | 0.67  | 1.22  | -0.45 | -0.61 | -0.50 | -0.59 | -0.99 | -0.62 | 2.11  |
| Q9BXS0 | Collagen alpha-1(XV) chain                                        | COL25A1   | -0.32 | 0.56 | 0.58  | 0.03  | 1.41  | -1.18 | -0.12 | -1.41 | 1.29  | -0.20 | 0.67  | -1.07 |
| Q13155 | Aminoacyl tRNA synthase complex-interacting multifunctional pr    | AIMP2     | -0.32 | 0.38 | 1.53  | -1.12 | -1.18 | 0.17  | 1.10  | 0.26  | 0.24  | -1.45 | 0.71  | -0.27 |
| O60506 | Heterogeneous nuclear ribonucleoprotein Q                         | SYNCRIP   | -0.32 | 1.01 | 1.43  | -1.26 | -0.33 | -0.53 | 1.88  | -0.54 | -0.85 | 0.37  | -0.47 | 0.30  |
| Q14642 | Inositol polyphosphate-5-phosphatase A                            | INPP5A    | -0.32 | 0.35 | -0.27 | 2.52  | -0.72 | -0.53 | -0.51 | -0.44 | -0.52 | 0.23  | -0.57 | 0.82  |
| O43169 | Cytochrome b5 type B                                              | CYB5B     | -0.32 | 0.35 | 2.20  | -0.46 | -0.61 | -0.28 | -0.38 | 1.50  | -0.39 | -0.77 | -0.43 | -0.38 |
| Q8TB55 | Zinc finger and SCAN domain-containing protein 18                 | ZSCAN18   | -0.32 | 0.47 | 1.82  | -1.10 | -0.93 | -0.18 | 1.01  | 0.69  | 0.78  | -0.65 | -0.69 | -0.75 |
| P09669 | Cytochrome c oxidase subunit 6C                                   | COX6C     | -0.32 | 0.88 | -0.45 | 0.99  | 0.89  | 0.53  | -0.91 | -0.85 | -0.87 | -1.46 | 1.20  | 0.93  |
| Q81ZL8 | Proline-, glutamic acid- and leucine-rich protein 1               | PELP1     | -0.32 | 0.45 | 1.22  | -0.77 | -1.48 | 1.24  | 0.38  | -0.49 | 0.22  | 0.23  | 0.86  | -1.41 |
| P62714 | Serine/threonine-protein phosphatase 2A catalytic subunit beta is | PPP2CB    | -0.32 | 1.72 | 0.97  | 0.06  | -1.21 | 0.24  | 1.66  | 0.02  | -0.38 | -1.86 | 0.38  | 0.12  |
| P48735 | Isocitrate dehydrogenase [NADP], mitochondrial                    | IDH2      | -0.32 | 1.63 | -0.77 | -0.27 | 2.00  | 0.17  | 0.54  | -0.95 | -0.41 | 1.29  | -0.62 | -0.96 |
| Q5TF21 | Protein SOGA3                                                     | SOGA3     | -0.32 | 1.33 | 1.36  | -0.96 | -0.26 | 0.47  | 0.82  | -1.42 | -1.52 | 0.54  | 0.79  | 0.18  |
| P35241 | Radixin                                                           | RDX       | -0.32 | 0.54 | -1.80 | -0.02 | 0.30  | 0.31  | 1.91  | -0.48 | -1.15 | 0.35  | 0.52  | 0.06  |
| P19021 | Peptidyl-glycine alpha-amidating monooxygenase                    | PAM       | -0.32 | 0.57 | 0.73  | 0.01  | 0.69  | -0.43 | -0.27 | 1.35  | -2.37 | 0.52  | -0.08 | -0.16 |
| Q7Z7L7 | Protein zer-1 homolog                                             | ZER1      | -0.32 | 0.35 | 2.02  | -1.04 | 0.50  | 0.06  | -1.07 | -0.96 | -0.92 | 0.43  | 0.58  | 0.40  |
| P98194 | Calcium-transporting ATPase type 2C member 1                      | ATP2C1    | -0.33 | 0.44 | -1.30 | 1.49  | -0.46 | -0.31 | 1.16  | 1.17  | -1.42 | -0.05 | -0.15 | -0.13 |
| Q9Y310 | tRNA-splicing ligase RtcB homolog                                 | RTC8      | -0.33 | 1.17 | -0.28 | 0.40  | -0.50 | 0.54  | 1.16  | 0.49  | -1.23 | -1.85 | 1.31  | -0.04 |
| Q9H019 | Mitochondrial fission regulator 1-like                            | MTFR1L    | -0.33 | 0.64 | -0.55 | 0.24  | -0.25 | 0.52  | 0.86  | -1.87 | -1.01 | -0.08 | 0.45  | 1.70  |
| O14908 | PDZ domain-containing protein GIPC1                               | GIPC1     | -0.33 | 0.41 | 0.13  | 0.78  | -1.00 | 0.58  | 0.07  | 0.38  | -2.34 | -0.22 | 0.71  | 0.92  |
| Q9ULT8 | E3 ubiquitin-protein ligase HECTD1                                | HECTD1    | -0.33 | 0.31 | 1.52  | 0.53  | -0.71 | 0.18  | -1.10 | 0.08  | 0.89  | -1.93 | 0.19  | 0.34  |
| Q9Y2L1 | Exosome complex exonuclease RRP44                                 | DIS3      | -0.33 | 0.52 | -1.79 | 1.28  | -0.37 | 0.71  | 0.83  | -0.71 | -1.06 | -0.34 | 0.75  | 0.70  |
| Q13557 | Calcium/calmodulin-dependent protein kinase type II subunit delt  | CAMK2D    | -0.33 | 0.79 | 0.51  | 0.12  | -0.64 | 0.48  | 0.51  | -0.40 | 1.60  | -2.23 | 0.25  | -0.19 |
| O14530 | Thioredoxin domain-containing protein 9                           | TXNDC9    | -0.33 | 0.47 | -0.35 | 1.32  | 0.85  | -0.56 | -0.65 | -0.49 | 1.96  | -1.01 | -0.51 | -0.56 |
| Q9NX40 | OClA domain-containing protein 1                                  | OClAD1    | -0.33 | 0.33 | 1.49  | -0.89 | -1.20 | 0.48  | 0.56  | 0.47  | -0.98 | -1.34 | 0.57  | 0.84  |
| P36222 | Chitinase-3-like protein 1                                        | CHI3L1    | -0.33 | 0.27 | -1.55 | 0.82  | 1.43  | -0.09 | -0.23 | -0.14 | -1.60 | 1.03  | -0.09 | 0.42  |
| P61353 | 60S ribosomal protein L27                                         | RPL27     | -0.33 | 0.71 | -0.48 | -0.88 | -0.43 | -0.01 | 2.71  | -0.49 | -0.14 | -0.27 | -0.23 | 0.22  |
| Q9NZ23 | Charged multivesicular body protein 5                             | CHMP5     | -0.33 | 0.40 | 0.35  | 1.31  | 0.71  | 0.40  | -2.22 | -0.99 | 0.26  | -0.53 | 0.41  | 0.31  |
| O60341 | Lysine-specific histone demethylase 1A                            | KDM1A     | -0.33 | 0.58 | 2.33  | -0.30 | -0.66 | -0.24 | -0.39 | 1.27  | -0.43 | -0.89 | -0.46 | -0.22 |
| Q06547 | GA-binding protein subunit beta-1                                 | GABPB1    | -0.33 | 0.52 | 1.83  | -0.58 | -0.79 | 0.96  | -0.75 | 1.05  | -0.64 | -1.06 | 0.52  | -0.54 |
| Q9B5D7 | Cancer-related nucleoside-triphosphatase                          | NTPCR     | -0.33 | 0.64 | 0.76  | 0.20  | 0.64  | 0.27  | -1.06 | 0.98  | -2.37 | 0.09  | 0.43  | 0.06  |
| P48553 | Trafficking protein particle complex subunit 10                   | TRAPPC10  | -0.33 | 0.48 | 0.93  | -0.02 | 0.06  | -0.28 | -0.06 | 0.91  | 1.06  | -2.43 | -0.37 | 0.20  |
| P07437 | Tubulin beta chain                                                | TUBB      | -0.33 | 1.10 | 0.31  | 1.92  | -0.40 | 0.24  | -0.83 | 0.87  | -0.85 | -1.66 | 0.14  | 0.27  |
| P22626 | Heterogeneous nuclear ribonucleoproteins A2/B1                    | HNRNPA2B1 | -0.33 | 0.67 | 1.72  | -0.73 | -1.36 | 0.65  | 0.56  | 0.57  | -1.11 | -1.03 | 0.46  | 0.29  |
| P62745 | Rho-related GTP-binding protein RhoB                              | RHOB      | -0.33 | 0.42 | -0.91 | 0.92  | -0.33 | 0.70  | 0.18  | -1.64 | -1.32 | 0.48  | 0.62  | 1.29  |
| P02545 | Prelamin-A/C                                                      | LMNA      | -0.33 | 0.30 | -1.65 | 0.66  | -0.58 | 0.91  | 1.07  | -0.99 | -1.21 | 0.61  | 0.66  | 0.53  |
| Q8TB45 | DEP domain-containing mTOR-interacting protein                    | DEPTOR    | -0.33 | 0.33 | 0.80  | -0.83 | -1.00 | 1.11  | 0.36  | -0.78 | 1.47  | -1.13 | 0.78  | -0.80 |
| P30419 | Glycylpeptide N-tetradecanoyltransferase 1                        | NMT1      | -0.33 | 1.34 | 0.58  | 1.65  | 0.26  | -0.33 | -0.72 | 0.35  | 0.60  | -2.17 | -0.26 | 0.04  |
| Q5T447 | E3 ubiquitin-protein ligase HECTD3                                | HECTD3    | -0.34 | 0.42 | 0.44  | 0.78  | 0.45  | 0.70  | -1.81 | 0.41  | 0.36  | -0.33 | 0.79  | -1.79 |
| Q9Y6Q5 | AP-1 complex subunit mu-2                                         | AP1M2     | -0.34 | 0.27 | 0.02  | 0.61  | 0.75  | 0.46  | -1.46 | -1.36 | -1.40 | 0.73  | 0.86  | 0.80  |
| Q9Y2H2 | Phosphatidylinositol phosphatase SAC2                             | INPP5F    | -0.34 | 0.42 | -0.50 | 0.75  | -0.95 | 1.42  | -0.18 | -0.80 | -0.80 | -1.18 | 1.34  | 0.89  |
| Q9UNA4 | DNA polymerase iota                                               | POLI      | -0.34 | 0.37 | 1.80  | -0.45 | -1.20 | 0.57  | -0.22 | 0.55  | 0.71  | -1.45 | 0.48  | -0.78 |
| Q92932 | Receptor-type tyrosine-protein phosphatase N2                     | PTPRN2    | -0.34 | 0.43 | -0.22 | 1.20  | -0.37 | -0.23 | 0.21  | -1.93 | 1.66  | 0.61  | -0.38 | -0.54 |
| P14866 | Heterogeneous nuclear ribonucleoprotein L                         | HNRNPL    | -0.34 | 1.74 | -0.33 | 0.98  | -0.01 | 0.66  | 0.48  | -0.67 | -2.14 | 1.12  | 0.64  | -0.74 |

|        |                                                                           |          |       |      |       |       |       |       |       |       |       |       |       |       |
|--------|---------------------------------------------------------------------------|----------|-------|------|-------|-------|-------|-------|-------|-------|-------|-------|-------|-------|
| P02751 | Fibronectin                                                               | FN1      | -0.34 | 0.48 | -1.54 | 0.55  | 0.07  | 0.45  | 1.10  | -1.87 | -0.55 | 0.66  | 0.40  | 0.73  |
| Q02J16 | Junctophilin-4                                                            | JPH4     | -0.34 | 0.35 | 0.26  | 1.22  | -1.34 | -1.07 | 1.41  | 0.16  | 0.08  | -1.46 | 0.55  | 0.18  |
| P20393 | Nuclear receptor subfamily 1 group D member 1                             | NR1D1    | -0.34 | 3.31 | 0.46  | -0.07 | 0.19  | -0.22 | 2.25  | -0.07 | -0.50 | -1.76 | -0.47 | 0.19  |
| Q5BK9Y | Protein FAM133B                                                           | FAM133B  | -0.34 | 0.41 | -0.05 | -1.54 | 0.25  | 0.89  | 0.99  | -1.66 | -0.84 | 0.49  | 0.80  | 0.67  |
| P82909 | 28S ribosomal protein S36, mitochondrial                                  | MRP36    | -0.34 | 0.41 | -1.47 | 0.87  | 0.71  | 1.06  | -0.63 | -1.51 | -0.17 | -0.53 | 0.61  | 1.06  |
| P43004 | Excitatory amino acid transporter 2                                       | SLC1A2   | -0.34 | 1.19 | 0.31  | 1.93  | -1.46 | 0.07  | 0.47  | -0.97 | 0.36  | -1.18 | -0.14 | 0.60  |
| 78324  | Tyrosine-protein phosphatase non-receptor type substrate 1                | SIRPA    | -0.34 | 0.43 | -0.83 | 1.82  | 0.31  | 0.21  | -0.94 | -0.34 | -0.14 | 1.57  | -0.78 | -0.89 |
| Q9UEW8 | STE20/SPS1-related proline-alanine-rich protein kinase                    | STK39    | -0.34 | 0.71 | 0.85  | 0.58  | -2.09 | 1.19  | 0.36  | -0.59 | -0.75 | -0.68 | 0.58  | 0.56  |
| P35998 | 26S proteasome regulatory subunit 7                                       | PSMC2    | -0.34 | 0.35 | -0.73 | 1.72  | 0.02  | 0.47  | -1.00 | 0.81  | -1.69 | -0.58 | 0.51  | 0.47  |
| Q8NF37 | Lysophosphatidylcholine acyltransferase 1                                 | LPCAT1   | -0.34 | 0.38 | 0.02  | -0.24 | -0.32 | -0.74 | 1.78  | 1.84  | -0.37 | -0.70 | -1.03 | -0.23 |
| Q8N6M0 | Deubiquitinase OTUD68                                                     | OTUD68   | -0.34 | 0.90 | 0.58  | 1.19  | -1.62 | 1.09  | -0.18 | -0.41 | -1.19 | -0.66 | 1.19  | 0.01  |
| P48730 | Casein kinase I isoform delta                                             | CSNK1D   | -0.34 | 0.49 | -0.55 | 1.23  | -1.36 | 0.67  | 0.65  | -0.21 | -1.90 | 0.71  | 0.39  | 0.38  |
| Q8N612 | FTS and Hook-interacting protein                                          | FAM160A2 | -0.34 | 0.43 | 1.49  | -0.99 | 0.46  | 0.71  | -1.10 | -0.96 | 1.14  | -0.55 | 0.72  | -0.91 |
| Q81Y67 | Ribonucleoprotein PTB-binding 1                                           | RAVER1   | -0.34 | 0.35 | 1.48  | -0.34 | -1.62 | -0.01 | 0.96  | 0.62  | 0.24  | -1.61 | 0.26  | 0.02  |
| Q5VTB9 | E3 ubiquitin-protein ligase RNF220                                        | RNF220   | -0.34 | 0.33 | 1.13  | 0.16  | -1.79 | 0.32  | 0.63  | 0.20  | -1.62 | 0.96  | 0.46  | -0.45 |
| O00139 | Kinesin-like protein KIF2A                                                | KIF2A    | -0.34 | 0.50 | -0.26 | 1.84  | -0.33 | 0.07  | -0.67 | -0.01 | 1.07  | -1.94 | 0.02  | 0.21  |
| Q9NRH2 | SNF-related serine/threonine-protein kinase                               | SNRK     | -0.34 | 0.45 | -0.31 | 1.08  | -1.37 | 0.38  | 0.81  | -1.15 | 1.53  | 0.39  | -0.30 | -1.07 |
| O60268 | Uncharacterized protein KIAA0513                                          | KIAA0513 | -0.34 | 0.53 | -0.19 | 1.87  | 0.19  | -0.26 | -0.94 | -0.32 | 1.32  | -1.57 | -0.36 | 0.25  |
| Q15382 | GTP-binding protein Rheb                                                  | RHEB     | -0.35 | 1.07 | 1.13  | 0.34  | -1.39 | 0.42  | 0.72  | 0.27  | 0.33  | -2.17 | 0.34  | 0.01  |
| Q9H4X1 | Regulator of cell cycle RGCC                                              | RGCC     | -0.35 | 0.36 | -0.29 | 2.45  | -0.70 | -0.44 | -0.54 | 0.54  | 0.74  | -0.77 | -0.47 | -0.52 |
| Q9NY65 | Tubulin alpha-8 chain                                                     | TUBA8    | -0.35 | 0.85 | 1.51  | 0.28  | -1.60 | 0.83  | 0.00  | -0.33 | 0.08  | -1.69 | 0.43  | 0.50  |
| P14324 | Farnesyl pyrophosphate synthase                                           | FDPFS    | -0.35 | 0.52 | -0.20 | -0.22 | 1.45  | 0.07  | -0.42 | -1.27 | -1.13 | 1.92  | 0.01  | -0.20 |
| O14545 | TRAF-type zinc finger domain-containing protein 1                         | TRAFD1   | -0.35 | 0.54 | -0.10 | -1.40 | 0.01  | -0.02 | -0.58 | 0.67  | -2.28 | -0.12 | 0.02  | 1.02  |
| Q9Y4E5 | E3 SUMO-protein ligase ZNF451                                             | ZNF451   | -0.35 | 0.68 | 1.14  | 0.70  | -0.66 | -0.92 | 0.58  | -1.80 | -0.26 | -0.60 | 0.53  | 1.28  |
| Q9UNN5 | FAS-associated factor 1                                                   | FAF1     | -0.35 | 0.90 | 0.86  | 1.25  | 0.17  | 0.42  | -1.64 | 0.98  | -1.09 | -0.75 | 0.63  | -0.84 |
| Q5TCQ9 | Membrane-associated guanylate kinase, WW and PDZ domain-con               | MAGI3    | -0.35 | 0.61 | -0.21 | 2.39  | -1.06 | -0.06 | -0.29 | 0.42  | -0.85 | 0.49  | -0.95 | 0.11  |
| Q6BD52 | UHRF1-binding protein 1                                                   | UHRF1BP1 | -0.35 | 0.36 | 0.33  | 1.53  | -1.52 | 0.53  | -0.38 | 0.92  | 0.32  | -1.67 | 0.10  | -0.16 |
| Q8TEQ0 | Sorting nexin-29                                                          | SNX29    | -0.35 | 0.56 | -0.38 | 0.98  | -0.98 | 1.72  | -0.63 | -0.55 | -0.58 | -1.04 | 1.36  | 0.11  |
| Q8N1G4 | Leucine-rich repeat-containing protein 47                                 | LRR47    | -0.35 | 0.82 | -0.42 | 1.17  | -0.40 | 1.15  | -0.51 | -1.30 | 0.07  | -1.49 | 1.25  | 0.48  |
| Q13595 | Transformer-2 protein homolog alpha                                       | TRA2A    | -0.35 | 0.43 | 0.07  | -0.79 | 1.01  | -0.59 | 0.89  | 0.45  | -2.07 | -0.59 | 0.87  | 0.78  |
| Q16836 | Hydroxyacyl-coenzyme A dehydrogenase, mitochondrial                       | HADH     | -0.35 | 0.64 | -1.01 | -0.51 | 1.88  | 0.47  | -0.04 | -1.71 | -0.09 | 0.56  | 0.78  | -0.34 |
| Q9HAU5 | Regulator of nonsense transcripts 2                                       | UPF2     | -0.35 | 0.45 | -0.37 | 0.44  | 1.57  | 0.05  | -1.10 | 0.48  | 1.02  | -1.93 | -0.14 | -0.03 |
| Q3KQU3 | MAP7 domain-containing protein 1                                          | MAP7D1   | -0.35 | 2.16 | 1.42  | -0.12 | 0.58  | 0.31  | -0.14 | 0.56  | 0.62  | -2.33 | -0.43 | -0.47 |
| P47870 | Gamma-aminobutyric acid receptor subunit beta-2                           | GABRB2   | -0.35 | 0.72 | 1.31  | -1.18 | -0.26 | 0.72  | 0.29  | 0.85  | 0.52  | -2.02 | 0.13  | -0.37 |
| Q14738 | Serine/threonine-protein phosphatase 2A 56 kDa regulatory subu            | PPP2R5D  | -0.35 | 0.72 | 1.54  | 0.64  | -1.40 | 0.22  | -0.11 | 0.44  | 0.33  | -1.96 | 0.08  | 0.23  |
| P54278 | Mismatch repair endonuclease PMS2                                         | PMS2     | -0.35 | 0.54 | 0.62  | -0.95 | -1.21 | 1.38  | 0.84  | 0.55  | 0.16  | -1.36 | 0.83  | -0.87 |
| Q62277 | 40S ribosomal protein S13                                                 | RPS13    | -0.35 | 1.27 | 0.13  | -0.23 | 0.66  | 0.48  | 0.41  | -1.87 | -0.64 | 1.95  | -0.34 | -0.54 |
| Q969T9 | WW domain-binding protein 2                                               | WBP2     | -0.35 | 0.32 | -0.85 | -0.84 | 0.41  | 0.36  | 1.36  | -0.93 | -0.85 | 1.71  | 0.46  | -0.83 |
| Q9Y6E0 | Serine/threonine-protein kinase 24                                        | STK24    | -0.35 | 0.56 | 0.26  | 0.71  | -0.37 | 0.62  | -0.49 | 0.48  | 0.57  | -2.58 | 0.13  | 0.67  |
| Q5TG3Y | AT-hook DNA-binding motif-containing protein 1                            | AHDC1    | -0.35 | 1.55 | 2.61  | -0.35 | -0.50 | -0.01 | -0.10 | -0.27 | -0.34 | -1.26 | 0.02  | 0.21  |
| Q96FJ0 | AMSH-like protease                                                        | STAMBP1  | -0.35 | 0.71 | -0.44 | 0.72  | 0.60  | 0.26  | -0.24 | -0.23 | 1.63  | 0.30  | -0.39 | -2.20 |
| P26440 | Isovaleryl-CoA dehydrogenase, mitochondrial                               | IVD      | -0.35 | 0.66 | -1.34 | 1.13  | 0.29  | 0.56  | 0.18  | -1.63 | -0.75 | 1.40  | 0.45  | -0.30 |
| Q14982 | Opioid-binding protein/cell adhesion molecule                             | OPCM1    | -0.36 | 0.27 | 0.19  | 1.35  | -1.59 | 0.29  | 0.12  | -1.75 | 0.11  | 1.17  | -0.13 | 0.24  |
| Q9UQ35 | Serine/arginine repetitive matrix protein 2                               | SRRM2    | -0.36 | 1.60 | 0.79  | -0.14 | 0.66  | 0.40  | -0.02 | -2.33 | -1.11 | 0.34  | 0.83  | 0.57  |
| P00751 | Complement factor B                                                       | CFB      | -0.36 | 0.42 | -1.47 | 1.01  | 0.45  | 0.87  | -0.30 | -0.55 | -1.80 | 0.25  | 0.79  | 0.75  |
| P46940 | Ras GTPase-activating-like protein IQGAP1                                 | IQGAP1   | -0.36 | 0.53 | 0.80  | 0.21  | 0.36  | 0.21  | -0.89 | -0.08 | -2.48 | 0.53  | 0.63  | 0.71  |
| Q9HCH3 | Copine-5                                                                  | CPNE5    | -0.36 | 0.74 | 0.53  | 0.29  | 0.24  | 0.32  | -0.45 | -2.04 | 1.44  | -0.37 | 0.99  | -0.96 |
| O15530 | 3-phosphoinositide-dependent protein kinase 1                             | PDPK1    | -0.36 | 0.94 | -0.84 | 1.52  | 0.00  | 0.71  | -0.29 | -1.03 | 0.11  | -1.75 | 0.67  | 0.90  |
| Q86T03 | Type 1 phosphatidylinositol 4,5-bisphosphate 4-phosphatase                | PIP4P1   | -0.36 | 0.36 | -1.52 | 1.47  | 0.60  | 0.42  | -0.50 | -1.42 | -0.79 | 0.37  | 0.81  | 0.55  |
| P29144 | Tripeptidyl-peptidase 2                                                   | TPP2     | -0.36 | 0.62 | -1.22 | 0.99  | -0.09 | 0.82  | 0.28  | -1.33 | -1.58 | 0.67  | 0.68  | 0.77  |
| Q9C0D3 | Protein zyg-11 homolog B                                                  | ZYG11B   | -0.36 | 0.40 | -0.74 | 0.55  | -1.09 | 1.14  | 0.68  | -0.80 | -0.81 | -1.13 | 0.79  | 1.42  |
| Q02750 | Dual specificity mitogen-activated protein kinase kinase 1                | MAP2K1   | -0.36 | 0.43 | 1.10  | 0.44  | 0.02  | 0.07  | -1.06 | 0.40  | 1.31  | -2.14 | 0.02  | -0.16 |
| Q13123 | Protein Red                                                               | IK       | -0.36 | 0.48 | -0.94 | 0.72  | -0.89 | 0.78  | 0.96  | -0.63 | -1.64 | -0.37 | 1.08  | 0.93  |
| P62241 | 40S ribosomal protein S8                                                  | RPS8     | -0.36 | 0.85 | -1.42 | -0.70 | 0.37  | 0.72  | 2.07  | -0.65 | -0.86 | -0.17 | 0.57  | 0.08  |
| Q8ND04 | Protein SMG8                                                              | SMG8     | -0.36 | 0.45 | 1.36  | 0.49  | -1.01 | 0.71  | -0.95 | 0.22  | 1.51  | -1.19 | -0.82 | -0.31 |
| Q10570 | Cleavage and polyadenylation specificity factor subunit 1                 | CPSF1    | -0.36 | 0.51 | 0.67  | -1.59 | -0.77 | 1.28  | 1.06  | -1.04 | 0.33  | -0.85 | 0.86  | 0.04  |
| P02462 | Collagen alpha-1(IV) chain                                                | COL4A1   | -0.36 | 0.28 | -0.59 | -0.73 | 2.24  | -0.05 | -0.47 | -0.71 | 0.38  | -0.89 | -0.34 | 1.16  |
| O95685 | Protein phosphatase 1 regulatory subunit 3D                               | PPP1R3D  | -0.36 | 1.90 | -1.01 | 0.91  | 1.56  | 0.20  | 0.20  | -0.35 | -1.95 | 0.71  | -0.41 | 0.17  |
| A6NIH7 | Protein unc-119 homolog B                                                 | UNC119B  | -0.36 | 0.34 | 0.41  | 0.42  | -1.37 | 0.81  | 0.20  | 0.38  | -1.27 | -1.53 | 0.81  | 1.14  |
| P35579 | Myosin-9                                                                  | MYH9     | -0.36 | 0.60 | 0.39  | -0.90 | 0.19  | 0.45  | 0.63  | -0.22 | -2.38 | -0.02 | 0.93  | 0.92  |
| Q9HCD5 | Nuclear receptor coactivator 5                                            | NCOA5    | -0.36 | 0.42 | 2.30  | -0.37 | -0.54 | -0.34 | -0.50 | 1.37  | -0.34 | -0.74 | -0.41 | -0.44 |
| Q9BZQ8 | Protein Niban 1                                                           | NIBAN1   | -0.36 | 0.37 | 0.91  | 1.54  | -0.39 | -0.57 | -0.99 | 0.26  | -0.86 | -1.18 | -0.17 | 1.45  |
| Q9BYB0 | SH3 and multiple ankyrin repeat domains protein 3                         | SHANK3   | -0.37 | 0.48 | 1.39  | -0.31 | 1.03  | -0.46 | -1.02 | 0.98  | 1.02  | -0.63 | -0.63 | -1.37 |
| Q63HN8 | E3 ubiquitin-protein ligase RNF213                                        | RNF213   | -0.37 | 0.47 | -0.75 | -0.32 | -0.60 | 0.45  | 1.82  | -1.75 | -0.55 | 0.55  | 0.32  | 0.82  |
| P13645 | Keratin, type 1 cytoskeletal 10                                           | KRT10    | -0.37 | 0.79 | 0.79  | -1.46 | 1.36  | -1.08 | 1.36  | -0.26 | 0.26  | 0.47  | -0.78 | -0.65 |
| Q15126 | Phosphomevalonate kinase                                                  | PMVK     | -0.37 | 0.62 | 0.99  | -0.64 | -0.82 | 0.88  | 0.36  | 0.83  | -1.01 | -1.86 | 0.84  | 0.41  |
| Q9HC56 | Protocadherin-9                                                           | PCDH9    | -0.37 | 0.35 | 1.34  | 0.91  | -1.32 | 0.71  | -1.18 | 0.49  | 0.44  | -1.44 | -0.32 | 0.36  |
| P37108 | Signal recognition particle 14 kDa protein                                | SRP14    | -0.37 | 1.01 | -0.35 | -0.53 | 2.51  | 0.20  | -0.64 | -1.07 | -0.15 | -0.65 | 0.28  | 0.43  |
| Q9H0F7 | ADP-ribosylation factor-like protein 6                                    | ARL6     | -0.37 | 0.38 | 1.29  | 0.49  | -1.29 | 1.11  | -1.09 | 0.55  | -0.24 | -1.41 | 0.79  | -0.21 |
| Q96SU4 | Oxysterol-binding protein-related protein 9                               | OSBP1L9  | -0.37 | 0.42 | 1.20  | -0.33 | 1.05  | -0.28 | -1.09 | 1.14  | -1.13 | -1.45 | 0.54  | 0.34  |
| P61923 | Coatomer subunit zeta-1                                                   | COPZ1    | -0.37 | 0.48 | 0.95  | 0.32  | -0.70 | 0.70  | -0.65 | 0.21  | 0.36  | -2.12 | -0.40 | 1.32  |
| Q02246 | Contactin-2                                                               | CNTN2    | -0.37 | 1.22 | -0.06 | 0.07  | -0.60 | 0.58  | 1.37  | -1.86 | -0.89 | 1.18  | 0.72  | -0.50 |
| O75663 | TJP41-like protein                                                        | TJP1L    | -0.37 | 1.38 | -0.73 | 0.26  | 1.67  | 0.43  | -0.16 | -1.34 | -1.56 | 1.01  | 0.40  | 0.01  |
| O00116 | Alkyl(dihydroxyacetone)phosphate synthase, peroxisomal                    | AGPS     | -0.37 | 0.45 | 0.90  | -1.49 | 0.86  | -0.76 | 1.08  | -0.10 | -1.19 | 1.32  | -0.57 | -0.04 |
| Q15008 | 26S proteasome non-ATPase regulatory subunit 6                            | PSMD6    | -0.37 | 1.12 | -0.67 | -1.15 | 0.33  | 1.71  | 1.03  | -0.93 | -1.06 | -0.44 | 0.93  | 0.25  |
| Q15831 | Serine/threonine-protein kinase STK11                                     | STK11    | -0.37 | 0.53 | -0.06 | 1.12  | -0.82 | 0.35  | 0.10  | -0.66 | 1.97  | -1.58 | -0.04 | -0.37 |
| Q9Y2I1 | Nischarin                                                                 | NISCH    | -0.37 | 0.28 | 1.32  | -0.11 | -1.36 | 0.28  | 0.27  | 0.51  | 1.03  | -1.96 | 0.22  | -0.19 |
| Q9NP97 | Dynein light chain roadblock-type 1                                       | DYNLRB1  | -0.37 | 4.04 | 1.39  | 1.52  | -0.27 | -0.37 | 0.63  | -0.70 | -1.05 | -0.75 | -1.18 | 0.78  |
| Q9UF56 | F-box/LRR-repeat protein 17                                               | FBXL17   | -0.37 | 0.55 | 1.37  | -0.84 | -0.97 | 0.42  | 0.72  | 0.77  | 1.24  | -1.27 | -0.70 | -0.74 |
| Q9BUJ2 | Heterogeneous nuclear ribonucleoprotein U-like protein 1                  | HNRNPUL1 | -0.37 | 0.58 | 1.77  | -0.76 | -1.53 | 0.48  | 0.78  | 0.47  | -0.34 | -0.99 | 0.68  | -0.57 |
| P07237 | Protein disulfide-isomerase                                               | P4HB     | -0.37 | 0.44 | -0.05 | 0.89  | 0.87  | -0.21 | -0.91 | -0.77 | 2.06  | -1.07 | -0.04 | -0.04 |
| P82979 | SAP domain-containing ribonucleoprotein                                   | SARNP    | -0.37 | 0.52 | -0.70 | -0.48 | 1.37  | 0.22  | 0.27  | -1.26 | -1.10 | 1.67  | 0.59  | -0.58 |
| Q08209 | Serine/threonine-protein phosphatase 2B catalytic subunit alpha is PPP3CA | PPP3CA   | -0.37 | 0.78 | 0.32  | 0.10  | -0.55 | 0.24  | 0.85  | -1.55 | -1.20 | 1.94  | 0.23  | -0.39 |

|        |                                                                                           |           |       |      |       |       |       |       |       |       |       |       |       |       |
|--------|-------------------------------------------------------------------------------------------|-----------|-------|------|-------|-------|-------|-------|-------|-------|-------|-------|-------|-------|
| P14543 | Nidogen-1                                                                                 | NID1      | -0.37 | 0.52 | -0.48 | -0.12 | 1.02  | 0.54  | -0.28 | -0.04 | -2.41 | 0.02  | 0.98  | 0.77  |
| Q9H008 | Phospholysine phosphohistidine inorganic pyrophosphate phosphatase                        | LHPP      | -0.37 | 0.23 | -1.39 | 0.22  | 0.61  | 0.86  | 0.02  | -1.23 | -1.48 | 1.19  | 0.76  | 0.44  |
| Q9J2L5 | Trafficking protein particle complex subunit 8                                            | TRAPPC8   | -0.37 | 0.53 | -1.26 | -0.07 | -0.25 | 0.31  | 1.95  | -1.42 | -0.72 | 0.83  | 0.37  | 0.26  |
| Q14689 | Disco-interacting protein 2 homolog A                                                     | DIP2A     | -0.37 | 0.82 | -1.63 | 1.81  | 0.56  | 0.39  | -0.14 | -0.41 | -1.06 | 0.57  | 0.65  | -0.73 |
| Q9HCE6 | Rho guanine nucleotide exchange factor 10-like protein                                    | ARHGEF10L | -0.38 | 0.49 | 0.40  | 0.23  | 0.40  | 0.30  | -0.69 | 0.38  | 0.15  | -2.57 | 0.32  | 1.08  |
| P38117 | Electron transfer flavoprotein subunit beta                                               | ETFb      | -0.38 | 1.00 | -0.52 | -0.38 | 0.34  | 0.28  | 1.44  | -2.13 | -0.78 | 0.82  | 0.63  | 0.31  |
| P14314 | Glucosidase 2 subunit beta                                                                | PRKCSH    | -0.38 | 0.39 | -0.88 | 0.90  | 1.04  | -0.50 | -0.03 | -0.99 | -1.01 | 1.19  | -1.00 | 1.29  |
| Q9HDC5 | Junctophilin-1                                                                            | JPH1      | -0.38 | 0.33 | 1.14  | 0.94  | -0.88 | -0.80 | 0.05  | 1.43  | 0.88  | -1.12 | -0.82 | -0.83 |
| P27708 | CAD                                                                                       | CAD       | -0.38 | 0.45 | 0.00  | 0.07  | 0.28  | -0.41 | 0.66  | -0.93 | -1.80 | 1.89  | -0.45 | 0.68  |
| Q15696 | U2 small nuclear ribonucleoprotein auxiliary factor 35 kDa subunit                        | ZKSR2     | -0.38 | 0.40 | -0.26 | 2.18  | -0.61 | -0.36 | -0.42 | -0.50 | -0.37 | -0.82 | -0.37 | 1.52  |
| Q9H7B4 | Histone-lysine N-methyltransferase SMYD3                                                  | SMYD3     | -0.38 | 0.59 | 0.63  | -1.98 | 0.52  | 1.07  | 0.52  | -0.76 | -0.66 | 0.28  | 1.15  | -0.76 |
| P23634 | Plasma membrane calcium-transporting ATPase 4                                             | ATP2B4    | -0.38 | 0.76 | -0.83 | 1.32  | 1.52  | -0.32 | -0.77 | -1.49 | 0.95  | -0.44 | -0.35 | 0.40  |
| Q9H3H3 | UPF0696 protein C11orf68                                                                  | C11orf68  | -0.38 | 0.81 | 0.79  | 1.41  | -0.85 | 0.71  | -1.10 | -1.20 | -0.63 | 1.34  | 0.05  | -0.53 |
| O43741 | 5'-AMP-activated protein kinase subunit beta-2                                            | PRKAB2    | -0.38 | 0.29 | -1.43 | 0.85  | -0.38 | 0.70  | 0.66  | -1.15 | 0.63  | -1.41 | 1.12  | 0.42  |
| Q8N1F8 | Serine/threonine-protein kinase 11-interacting protein                                    | STK11IP   | -0.38 | 0.51 | 0.41  | 0.80  | -1.74 | 0.71  | 0.48  | -1.33 | -0.67 | -0.52 | 0.60  | 1.26  |
| Q9Y5S9 | RNA-binding protein 8A                                                                    | RBM8A     | -0.38 | 1.39 | 1.50  | -0.12 | 0.04  | 0.23  | -0.16 | -0.37 | -2.36 | -0.07 | 0.84  | 0.47  |
| Q7Z4L5 | Tetratricopeptide repeat protein 21B                                                      | TTC21B    | -0.38 | 0.51 | 0.99  | -0.82 | -1.01 | 1.07  | 0.42  | -0.82 | -0.80 | -1.18 | 0.94  | 1.20  |
| Q9NVA2 | Septin-11                                                                                 | SEPTIN11  | -0.38 | 1.11 | 1.04  | 1.05  | -1.58 | -0.59 | 1.34  | -0.59 | 0.85  | -0.24 | -0.98 | -0.31 |
| Q9Y5X3 | Sorting nexin-5                                                                           | SNX5      | -0.38 | 0.47 | -1.86 | 1.62  | 0.58  | 0.29  | -0.02 | -0.57 | -0.84 | -0.44 | 0.12  | 1.12  |
| Q9BQ87 | F-box-like/WD repeat-containing protein TBL1Y                                             | TBL1Y     | -0.38 | 1.32 | 2.65  | -0.08 | -0.48 | -0.19 | -0.44 | 0.08  | -0.31 | -1.19 | -0.01 | -0.04 |
| P42262 | Glutamate receptor 2                                                                      | GRIA2     | -0.38 | 1.22 | -0.78 | 0.93  | 0.44  | 1.04  | -0.28 | -2.14 | -0.31 | -0.40 | 1.07  | 0.44  |
| Q14103 | Heterogeneous nuclear ribonucleoprotein D0                                                | HNRNPd    | -0.38 | 1.35 | 1.29  | 0.37  | -0.64 | 0.94  | -0.51 | 0.13  | -1.99 | -0.61 | 1.12  | -0.10 |
| Q96JP5 | E3 ubiquitin-protein ligase ZFP91                                                         | ZFP91     | -0.38 | 0.53 | -0.89 | -0.20 | 0.86  | 0.33  | 0.58  | -1.27 | -1.24 | 1.91  | 0.27  | -0.36 |
| Q9UPU5 | Ubiquitin carboxyl-terminal hydrolase 24                                                  | USP24     | -0.38 | 0.77 | -1.33 | 1.62  | 0.44  | 0.57  | -0.36 | -1.64 | -0.29 | -0.40 | 0.48  | 0.90  |
| Q9CWN6 | Histone H2B type 2-F                                                                      | HIST2H2BF | -0.38 | 0.54 | 0.56  | -1.40 | 2.19  | -0.26 | -0.39 | 0.42  | -1.18 | -0.14 | -0.07 | 0.27  |
| Q8NDT2 | Putative RNA-binding protein 15B                                                          | RBM15B    | -0.38 | 0.53 | 1.66  | -0.65 | -0.76 | -0.56 | 0.99  | 1.51  | -0.67 | -0.97 | -0.01 | -0.54 |
| Q05D32 | CTD small phosphatase-like protein 2                                                      | CTDSP12   | -0.38 | 0.33 | 0.67  | -1.22 | -0.26 | 0.70  | 0.55  | 1.48  | 0.35  | -1.51 | 0.42  | -1.20 |
| Q9H089 | Large subunit GTPase 1 homolog                                                            | LSG1      | -0.38 | 0.29 | 0.60  | 0.90  | -1.31 | 0.49  | -0.27 | 0.26  | -1.24 | -1.46 | 0.98  | 1.06  |
| Q15599 | Na(+)/H(+) exchange regulatory cofactor NHE-RF2                                           | SLC9A3R2  | -0.38 | 1.04 | -1.43 | 0.55  | 0.26  | 0.59  | 1.21  | -1.13 | -1.40 | 1.17  | 0.38  | -0.21 |
| O00255 | Menin                                                                                     | MEN1      | -0.39 | 0.49 | 0.57  | 0.95  | -1.75 | 1.25  | -0.38 | 0.51  | -1.43 | -0.41 | 0.72  | -0.04 |
| Q81UK8 | Cerebellin-2                                                                              | CBLN2     | -0.39 | 0.42 | 1.00  | -0.61 | -0.73 | -0.53 | 1.43  | -0.55 | -0.67 | 1.83  | -0.62 | -0.54 |
| Q81ZQ1 | WD repeat and FYVE domain-containing protein 3                                            | WDFY3     | -0.39 | 0.44 | -1.37 | 1.00  | 0.08  | 0.24  | 0.62  | -1.89 | -0.23 | 0.02  | 0.09  | 1.44  |
| Q9H244 | P2Y purinoceptor 12                                                                       | P2RY12    | -0.39 | 0.45 | -1.69 | 0.68  | 0.24  | 0.51  | 0.84  | -0.68 | -1.62 | 1.09  | 0.63  | 0.01  |
| O95278 | Laforin                                                                                   | EPMA2A    | -0.39 | 0.72 | 0.63  | 0.24  | -1.78 | 0.92  | 0.88  | 0.15  | -0.97 | -1.37 | 0.52  | 0.79  |
| P61601 | Neurocalcin-delta                                                                         | NCALD     | -0.39 | 0.39 | -0.81 | -0.05 | -1.08 | 0.82  | 1.65  | -0.92 | -0.86 | 1.36  | 0.36  | -0.45 |
| P05387 | 60S acidic ribosomal protein P2                                                           | RPLP2     | -0.39 | 0.36 | -0.69 | 0.00  | -0.38 | -0.27 | 1.82  | -1.78 | -0.41 | 1.25  | 0.24  | 0.20  |
| Q7Z5Q1 | Cytoplasmic polyadenylation element-binding protein 2                                     | CPEB2     | -0.39 | 0.53 | -0.63 | -1.03 | 0.65  | 1.09  | 0.60  | -1.04 | -1.69 | 0.52  | 1.07  | 0.47  |
| O75884 | Serine hydrolase RBBP9                                                                    | RBBP9     | -0.39 | 0.45 | -0.91 | 1.10  | 0.37  | 0.16  | -0.11 | -0.17 | -2.15 | -0.20 | 0.60  | 1.32  |
| Q81YB8 | ATP-dependent RNA helicase SUPV3L1, mitochondrial                                         | SUPV3L1   | -0.39 | 0.43 | -0.71 | -0.96 | 0.95  | 0.95  | 0.35  | -0.90 | -0.89 | -1.13 | 0.99  | 1.35  |
| Q9BRX8 | Peroxiorexin-like 2A                                                                      | PRXL2A    | -0.39 | 2.04 | 2.65  | -0.01 | -0.61 | 0.20  | -0.21 | -0.69 | -0.95 | -0.31 | -0.23 | 0.15  |
| Q16555 | Dihydropyrimidine-related protein 2                                                       | DPYSL2    | -0.39 | 1.83 | -0.76 | -0.62 | 1.23  | 1.08  | 0.86  | -0.86 | -0.67 | 0.69  | 0.64  | -1.60 |
| P17612 | cAMP-dependent protein kinase catalytic subunit alpha                                     | PRKACA    | -0.39 | 1.45 | -1.05 | -0.33 | 0.79  | 1.10  | 1.02  | -1.04 | 0.64  | -1.52 | 0.92  | -0.52 |
| O43395 | U4/U6 small nuclear ribonucleoprotein Prp3                                                | PRPF3     | -0.39 | 0.75 | -0.48 | -1.00 | 0.73  | 0.71  | 0.95  | -0.82 | -0.86 | -1.42 | 0.95  | 1.23  |
| Q9H9P5 | Putative E3 ubiquitin-protein ligase UNKL                                                 | UNKL      | -0.39 | 0.56 | 0.73  | 0.35  | -1.17 | 0.12  | 0.69  | 2.01  | -0.84 | -1.24 | -0.25 | -0.39 |
| Q9Y2Q3 | Glutathione S-transferase kappa 1                                                         | GSTK1     | -0.39 | 2.08 | 0.63  | 0.47  | 1.15  | -0.73 | 0.46  | -1.46 | -1.40 | -0.40 | -0.16 | 1.43  |
| Q9UKY1 | Zinc fingers and homeoboxes protein 1                                                     | ZHX1      | -0.39 | 0.62 | -0.49 | -0.79 | 1.63  | -0.64 | 1.07  | -0.73 | -0.67 | -1.11 | 1.20  | 0.53  |
| Q8WXG6 | MAP kinase-activating death domain protein                                                | MADD      | -0.39 | 0.86 | -0.80 | 0.98  | 0.26  | 0.97  | -0.39 | -2.03 | 0.03  | -0.76 | 0.88  | 0.86  |
| P50991 | T-complex protein 1 subunit delta                                                         | CCT4      | -0.39 | 1.48 | 0.25  | 0.27  | 0.37  | 0.64  | 0.09  | -2.22 | -1.22 | 1.18  | 0.70  | -0.06 |
| Q15878 | Voltage-dependent R-type calcium channel subunit alpha-1E                                 | CACNA1E   | -0.39 | 0.37 | 0.16  | 0.54  | -0.09 | 0.31  | -0.41 | 0.23  | 1.55  | -2.38 | 0.43  | -0.33 |
| P55327 | Tumor protein D52                                                                         | TPD52     | -0.39 | 0.54 | -0.36 | -0.26 | -1.24 | 1.36  | 1.19  | -1.42 | -0.61 | -0.24 | 1.18  | 0.40  |
| Q96F85 | CB1 cannabinoid receptor-interacting protein 1                                            | CNRI1P    | -0.39 | 1.58 | 0.52  | 1.39  | -1.80 | 0.76  | 0.78  | -1.08 | -0.55 | -0.54 | 0.75  | -0.23 |
| Q14141 | Septin-6                                                                                  | SEPTIN6   | -0.39 | 1.21 | -0.16 | 2.06  | 0.09  | -0.25 | -0.41 | -1.50 | 0.50  | -1.03 | 0.93  | -0.24 |
| Q15119 | [Pyruvate dehydrogenase (acetyl-transferring)] kinase isozyme 2, PDK2                     | PDK2      | -0.40 | 0.61 | -0.32 | -0.32 | 2.34  | -0.36 | -0.57 | 1.31  | -0.43 | -0.73 | -0.48 | -0.44 |
| P53582 | Methionine aminopeptidase 1                                                               | METAP1    | -0.40 | 0.44 | 0.86  | -0.16 | -0.38 | 1.08  | -0.82 | 0.14  | -2.25 | 0.28  | 1.03  | 0.21  |
| P60484 | Phosphatidylinositol 3,4,5-trisphosphate 3-phosphatase and dual-specificity phosphatase 1 | PTEN      | -0.40 | 1.94 | -0.55 | 1.17  | 0.09  | 0.94  | 0.24  | -1.89 | -1.43 | 0.34  | 0.69  | 0.39  |
| P16870 | Carboxypeptidase E                                                                        | CPE       | -0.40 | 0.54 | 0.85  | 1.54  | -0.17 | -1.29 | -0.24 | 0.38  | 0.78  | 0.61  | -1.21 | -1.25 |
| Q8N8A2 | Serine/threonine-protein phosphatase 6 regulatory ankyrin repeat                          | ANKRD44   | -0.40 | 0.67 | -1.11 | 0.73  | 1.90  | 0.08  | -0.78 | 0.41  | -0.45 | -1.49 | 0.02  | 0.66  |
| P07686 | Beta-hexosaminidase subunit beta                                                          | HEXB      | -0.40 | 0.23 | -1.32 | 0.62  | 0.45  | 0.51  | 0.07  | -1.35 | -1.37 | 0.28  | 0.61  | 1.50  |
| Q9HB71 | Calcyclin-binding protein                                                                 | CACYBP    | -0.40 | 1.68 | -0.96 | 1.50  | 0.14  | 0.75  | 0.27  | -1.72 | 0.58  | -1.21 | 0.63  | 0.03  |
| P05062 | Fructose-bisphosphate aldolase B                                                          | ALDOB     | -0.40 | 1.57 | 0.83  | 0.37  | 2.01  | -0.34 | -1.22 | -0.88 | 0.01  | 0.65  | -0.28 | -1.12 |
| Q96M20 | Ganglioside-induced differentiation-associated protein 1-like 1                           | GDAP1L1   | -0.40 | 0.50 | -0.47 | 0.81  | -1.34 | 0.67  | 0.98  | -0.48 | 0.65  | -1.92 | 0.53  | 0.57  |
| P10636 | Microtubule-associated protein tau                                                        | MAPT      | -0.40 | 1.18 | 0.82  | 0.24  | 0.92  | -0.04 | -0.60 | -1.17 | 1.88  | -1.37 | -0.15 | -0.52 |
| Q93008 | Probable ubiquitin carboxyl-terminal hydrolase FAF-X                                      | USP9X     | -0.40 | 0.66 | 1.39  | -0.33 | 0.36  | -1.40 | 0.80  | 1.30  | -0.02 | 0.09  | -0.81 | -1.37 |
| Q9NZJ4 | Sacsin                                                                                    | SACS      | -0.40 | 0.73 | 0.18  | 1.02  | -1.54 | 0.31  | 0.92  | 1.56  | -0.65 | -1.06 | 0.07  | -0.80 |
| P51114 | Fragile X mental retardation syndrome-related protein 1                                   | FXR1      | -0.40 | 0.62 | 1.18  | -0.77 | -0.78 | 0.25  | 0.89  | 0.55  | 0.82  | -2.14 | 0.05  | -0.05 |
| P61088 | Ubiquitin-conjugating enzyme E2 N                                                         | UBE2N     | -0.40 | 2.08 | 0.33  | 1.07  | 0.87  | -1.25 | 0.94  | -1.55 | 0.07  | 0.54  | -1.32 | 0.30  |
| Q9U112 | V-type proton ATPase subunit H                                                            | ATP6V1H   | -0.40 | 2.12 | -0.06 | 1.83  | 0.71  | 0.61  | -1.10 | -1.33 | 0.39  | -0.54 | 0.51  | -1.03 |
| Q2TA20 | Autophagy-related protein 2 homolog A                                                     | ATG2A     | -0.40 | 0.53 | 1.86  | 1.24  | -0.99 | -0.71 | -0.71 | -0.66 | -0.59 | 0.81  | 0.40  | -0.64 |
| Q7L2E3 | ATP-dependent RNA helicase DHX30                                                          | DHX30     | -0.40 | 1.36 | -0.26 | 2.56  | -0.02 | 0.20  | -0.98 | -0.17 | -1.02 | -0.37 | -0.27 | 0.34  |
| P14678 | Small nuclear ribonucleoprotein-associated proteins B and B'                              | SNRPB     | -0.40 | 1.35 | 0.34  | -0.13 | 1.17  | -0.56 | 0.65  | -1.83 | -0.93 | 0.29  | -0.50 | 1.49  |
| P54750 | Calcium/calmodulin-dependent 3',5'-cyclic nucleotide phosphodiesterase 1                  | PDE1A     | -0.40 | 1.30 | 0.20  | 0.93  | -1.63 | 1.21  | 0.71  | -1.52 | 0.35  | -0.32 | 0.73  | -0.64 |
| Q96FJ2 | Dynein light chain 2, cytoplasmic                                                         | DYNLL2    | -0.40 | 3.09 | 1.23  | 1.33  | -1.06 | 0.08  | 0.93  | -1.85 | -0.11 | -0.16 | -0.51 | 0.11  |
| Q5VZF2 | Muscleblind-like protein 2                                                                | MBNL2     | -0.40 | 0.68 | 1.24  | -1.10 | -1.52 | 0.95  | 1.29  | -0.11 | -0.26 | -0.98 | 0.58  | -0.08 |
| Q92599 | Septin-8                                                                                  | SEPTIN8   | -0.40 | 2.24 | 0.27  | 0.04  | 2.32  | -0.62 | 0.06  | -1.57 | -0.70 | 0.34  | -0.22 | 0.09  |
| Q9VWV2 | GTPase-activating Rap/Ran-GAP domain-like protein 3                                       | GARNL3    | -0.41 | 1.35 | 0.84  | -0.58 | -1.08 | 0.77  | 1.49  | 0.58  | -0.62 | -1.48 | 0.76  | -0.69 |
| O95260 | Arginyl-tRNA--protein transferase 1                                                       | ATE1      | -0.41 | 0.49 | 0.73  | 0.56  | -1.48 | 0.46  | 0.37  | 0.65  | 0.58  | -2.09 | -0.37 | 0.60  |
| O43670 | BUB3-interacting and GLEBS motif-containing protein ZNF207                                | ZNF207    | -0.41 | 0.78 | 0.17  | -1.15 | -0.41 | 1.09  | 1.25  | -0.76 | -1.71 | 0.74  | 0.82  | -0.02 |
| Q9NZ63 | Telomere length and silencing protein 1 homolog                                           | C9orf78   | -0.41 | 0.39 | 2.30  | -0.39 | -0.53 | -0.36 | -0.50 | 1.38  | -0.40 | -0.71 | -0.41 | -0.38 |
| Q8N026 | Tetratricopeptide repeat protein 5                                                        | TTC5      | -0.41 | 0.66 | -0.50 | 0.65  | -0.18 | 0.11  | 0.76  | 1.07  | 0.01  | -2.40 | -0.35 | 0.83  |
| Q9NX05 | Constitutive coactivator of PPAR-gamma-like protein 2                                     | FAM120C   | -0.41 | 0.47 | 1.80  | 0.36  | -0.80 | -0.18 | -0.56 | 1.59  | -0.28 | -1.37 | -0.30 | -0.25 |
| Q13449 | Limbic system-associated membrane protein                                                 | LSAMP     | -0.41 | 0.66 | -0.79 | 1.28  | -0.25 | 0.51  | 0.08  | -1.47 | -1.35 | 1.47  | 0.02  | 0.50  |
| P49790 | Nuclear pore complex protein Nup153                                                       | NUP153    | -0.41 | 0.79 | 2.63  | -0.27 | -0.55 | -0.25 | -0.58 | 0.35  | -0.40 | -0.82 | 0.36  | -0.46 |
| Q9H0J9 | Protein mono-ADP-ribosyltransferase PARP12                                                | PARP12    | -0.41 | 0.69 | 0.37  | 1.49  | -0.83 | 0.50  | -0.68 | -0.68 | -0.81 | 1.24  | 0.81  | -1.39 |



|        |                                                                  |       |      |       |       |       |       |       |       |       |       |       |       |
|--------|------------------------------------------------------------------|-------|------|-------|-------|-------|-------|-------|-------|-------|-------|-------|-------|
| P11177 | Pyruvate dehydrogenase E1 component subunit beta, mitochondrial  | -0.41 | 1.54 | 0.29  | -0.74 | 1.63  | 1.16  | -0.75 | -0.61 | 1.29  | -0.96 | -0.69 | -0.62 |
| Q16822 | Phosphoenolpyruvate carboxykinase [GTP], mitochondrial           | -0.41 | 0.39 | 1.16  | -0.74 | 1.41  | -0.63 | -0.68 | 1.39  | -0.76 | -0.95 | -0.74 | 0.54  |
| O15090 | Zinc finger protein 536                                          | -0.41 | 1.78 | 0.49  | 2.04  | 0.60  | -0.38 | -0.98 | -1.15 | -0.88 | 0.58  | -0.73 | 0.40  |
| Q92551 | Inositol hexakisphosphate kinase 1                               | -0.41 | 0.86 | -0.14 | 1.71  | -0.86 | 0.80  | -0.49 | -0.38 | -0.73 | -0.92 | 1.60  | -0.60 |
| C9JTQ0 | Ankyrin repeat domain-containing protein 63                      | -0.41 | 2.05 | 0.90  | 0.32  | -0.17 | 0.66  | 0.32  | 0.54  | -2.43 | -0.94 | 0.14  | 0.65  |
| Q96EP5 | DAZ-associated protein 1                                         | -0.41 | 1.04 | 0.40  | 0.07  | -0.29 | 0.92  | 0.12  | -0.57 | -2.47 | 0.13  | 0.84  | 0.85  |
| P35659 | Protein DEK                                                      | -0.41 | 0.63 | -0.68 | -0.18 | 0.19  | 0.70  | 0.76  | 0.50  | -2.16 | -0.53 | 1.49  | -0.09 |
| P16591 | Tyrosine-protein kinase Fer                                      | -0.41 | 0.38 | 1.49  | -0.64 | -0.87 | 0.45  | 0.08  | 1.02  | 0.36  | -2.02 | 0.32  | -0.18 |
| P00533 | Epidermal growth factor receptor                                 | -0.41 | 0.22 | -0.99 | -1.12 | 1.04  | 0.43  | 0.96  | -0.18 | -1.87 | 0.49  | 0.65  | 0.60  |
| Q9GZT9 | Egl nine homolog 1                                               | -0.41 | 1.09 | 0.15  | -0.60 | 1.55  | 1.22  | -1.08 | -1.06 | -0.06 | -1.15 | 1.07  | -0.03 |
| Q8NSJ2 | Ubiquitin carboxyl-terminal hydrolase MINDY-1                    | -0.41 | 0.56 | 0.88  | -0.09 | 0.62  | 0.59  | -1.29 | -0.54 | -1.81 | -0.40 | 1.13  | 0.91  |
| Q9NRW1 | Ras-related protein Rab-6B                                       | -0.41 | 2.08 | 0.65  | 1.44  | -1.07 | 1.20  | -0.27 | -0.46 | -1.11 | -1.19 | 0.98  | -0.18 |
| Q15059 | Bromodomain-containing protein 3                                 | -0.42 | 0.64 | -1.06 | 1.30  | -0.17 | 0.76  | -0.03 | -1.24 | -1.13 | -0.60 | 1.16  | 1.02  |
| P62701 | 40S ribosomal protein S4, X isoform                              | -0.42 | 1.57 | 0.90  | 0.52  | 1.72  | -0.65 | -0.88 | 0.48  | -1.20 | 0.70  | -0.40 | -1.20 |
| Q9NP61 | ADP-ribosylation factor GTPase-activating protein 3              | -0.42 | 0.94 | -0.39 | 0.28  | -0.38 | 1.39  | 0.22  | -0.61 | -1.55 | -1.17 | 1.24  | 0.98  |
| Q8N8R7 | ARL14 effector protein                                           | -0.42 | 1.05 | 1.75  | 1.28  | -0.91 | -0.37 | -0.56 | -0.52 | -0.42 | -1.04 | -0.37 | 1.16  |
| Q14008 | Cytoskeleton-associated protein 5                                | -0.42 | 0.69 | 0.51  | 1.80  | -0.69 | -0.19 | -0.57 | 0.04  | 0.48  | -1.99 | -0.05 | 0.67  |
| P48380 | Transcription factor RFX3                                        | -0.42 | 0.52 | -0.47 | -0.51 | -0.83 | 1.49  | 1.00  | -0.52 | 1.75  | -0.84 | -0.57 | -0.50 |
| Q72408 | CUB and sushi domain-containing protein 2                        | -0.42 | 0.57 | -0.53 | 0.59  | -0.17 | 1.15  | -0.31 | -0.45 | -0.10 | -2.16 | 1.19  | 0.78  |
| Q08752 | Peptidyl-prolyl cis-trans isomerase D                            | -0.42 | 0.97 | 0.75  | 1.34  | -0.98 | 0.62  | -0.61 | -0.59 | -1.46 | -0.89 | 0.74  | 1.07  |
| P61962 | DDB1- and CUL4-associated factor 7                               | -0.42 | 1.00 | 1.10  | -0.84 | -1.06 | 0.73  | 1.21  | -0.11 | 0.23  | -1.81 | -0.23 | 0.77  |
| Q5SQN1 | Synaptosomal-associated protein 47                               | -0.42 | 0.50 | 1.20  | 0.90  | -1.31 | 0.93  | -1.07 | 0.15  | 0.42  | -1.48 | 0.67  | -0.41 |
| P07814 | Bifunctional glutamate/proline-tRNA ligase                       | -0.42 | 1.53 | -0.46 | 1.41  | 0.61  | 0.03  | 0.01  | 1.12  | -1.03 | -1.99 | -0.08 | 0.38  |
| P20936 | Ras GTPase-activating protein 1                                  | -0.42 | 1.15 | -0.95 | 1.97  | -0.54 | 0.62  | 0.17  | -0.57 | 0.49  | -1.68 | 0.27  | 0.21  |
| P49207 | 60S ribosomal protein L34                                        | -0.42 | 0.78 | -0.95 | -0.17 | -0.59 | 0.10  | 2.59  | -0.89 | -0.15 | -0.29 | 0.05  | 0.32  |
| Q16352 | Alpha-internexin                                                 | -0.42 | 0.94 | 0.35  | 0.11  | 1.63  | -0.04 | -0.96 | 0.11  | 1.18  | -1.94 | -0.36 | -0.08 |
| Q92876 | Kallikrein-6                                                     | -0.42 | 0.70 | -0.09 | -0.70 | 1.15  | 0.93  | -0.43 | -0.37 | -0.62 | 0.95  | 1.07  | -1.89 |
| Q3V6T2 | Girdin                                                           | -0.42 | 1.23 | 0.94  | 0.05  | 0.50  | 0.41  | -0.51 | 0.67  | 1.52  | -1.70 | -0.76 | -1.11 |
| Q96Q15 | Serine/threonine-protein kinase SMG1                             | -0.43 | 0.54 | 0.02  | 0.79  | 0.44  | -0.31 | -0.24 | 1.53  | -2.27 | -0.52 | 0.03  | 0.52  |
| P62834 | Ras-related protein Rap-1A                                       | -0.43 | 0.52 | -0.27 | 0.33  | 0.49  | 0.54  | -0.40 | 0.28  | -2.64 | 0.67  | 0.78  | 0.23  |
| Q9NQR4 | Omega-amidase NIT2                                               | -0.43 | 0.62 | 0.11  | 0.07  | 0.92  | -0.06 | -0.24 | 0.95  | -2.60 | 0.14  | 0.09  | 0.62  |
| Q9Y4F9 | Rho family-interacting cell polarization regulator 2             | -0.43 | 1.14 | -0.02 | -0.37 | -0.59 | 2.74  | -0.44 | -0.22 | -0.04 | -0.84 | -0.10 | -0.11 |
| P661X1 | Dipeptidyl peptidase 8                                           | -0.43 | 1.23 | 1.48  | -1.57 | 0.22  | 1.65  | -0.40 | -0.81 | -0.46 | 0.57  | -0.32 | -0.36 |
| O60285 | NUAK family SNF1-like kinase 1                                   | -0.43 | 0.38 | 0.74  | 0.16  | -1.58 | 0.74  | 0.45  | 0.41  | 1.08  | -1.67 | 0.55  | -0.88 |
| Q9HQZ5 | Uncharacterized protein C1orf198                                 | -0.43 | 0.35 | -0.74 | 0.16  | -0.05 | 0.33  | 0.78  | -0.54 | -2.31 | 1.16  | 0.61  | 0.59  |
| P31323 | cAMP-dependent protein kinase type II-beta regulatory subunit    | -0.43 | 0.96 | 0.50  | 0.23  | 0.02  | 1.15  | -0.77 | -1.29 | 0.65  | -1.81 | 1.18  | 0.13  |
| Q43350 | Arf-GAP with SH3 domain, ANK repeat and PH domain-containing     | -0.43 | 0.55 | -0.02 | 0.80  | -1.63 | 1.09  | 0.47  | 0.15  | 0.57  | -1.82 | -0.33 | 0.73  |
| Q92667 | A-kinase anchor protein 1, mitochondrial                         | -0.43 | 0.66 | 1.57  | -0.62 | -0.82 | 1.32  | -0.63 | -0.72 | -0.56 | -1.12 | 0.84  | 0.74  |
| P47736 | Rap1 GTPase-activating protein 3                                 | -0.43 | 1.83 | 0.80  | -0.18 | -0.89 | 1.78  | 0.29  | -1.33 | -0.67 | -1.10 | 0.63  | 0.68  |
| Q8TBX8 | Phosphatidylinositol 5-phosphate 4-kinase type-2 gamma           | -0.43 | 0.82 | 0.51  | 0.94  | -1.00 | 0.85  | -0.32 | -0.04 | 1.12  | -2.12 | 0.42  | -0.37 |
| O40479 | High mobility group nucleosome-binding domain-containing protein | -0.43 | 0.92 | 1.22  | 0.81  | 0.97  | -0.47 | -1.44 | 0.09  | 0.11  | -1.40 | -0.85 | 0.97  |
| P46527 | Cyclin-dependent kinase inhibitor 1B                             | -0.43 | 0.64 | -1.20 | 1.96  | 0.51  | 0.54  | -1.01 | -0.98 | -0.75 | 0.15  | -0.01 | 0.78  |
| Q15477 | Helicase SKI2W                                                   | -0.43 | 0.72 | -1.16 | -0.06 | -0.28 | 0.85  | 1.53  | 0.03  | -0.51 | 0.88  | 0.51  | -1.79 |
| Q9H0K1 | Serine/threonine-protein kinase SIK2                             | -0.43 | 0.72 | 0.23  | 0.45  | -1.43 | 1.01  | 0.62  | 0.53  | -1.18 | -1.63 | 0.70  | 0.70  |
| Q9UF11 | Pleckstrin homology domain-containing family B member 1          | -0.43 | 1.22 | -1.33 | 0.36  | 0.67  | 0.23  | 1.42  | -1.41 | -0.71 | 0.86  | 0.79  | -0.87 |
| Q16658 | Fascin                                                           | -0.43 | 1.70 | -0.83 | 0.38  | 0.56  | 1.29  | 0.33  | -1.14 | 0.51  | -0.77 | 1.24  | -1.55 |
| Q14938 | Nuclear factor 1 X-type                                          | -0.43 | 0.55 | 1.05  | -0.89 | -1.53 | 0.84  | 1.24  | 0.20  | -1.20 | -0.72 | 0.64  | 0.36  |
| Q14157 | Ubiquitin-associated protein 2-like                              | -0.43 | 1.24 | 1.13  | -1.62 | 1.48  | -0.11 | 0.49  | 0.89  | -0.67 | -1.11 | -0.42 | -0.06 |
| P36969 | Phospholipid hydroperoxide glutathione peroxidase                | -0.43 | 0.58 | -0.90 | 0.44  | 0.51  | -0.03 | 0.73  | -1.02 | -1.83 | 1.64  | 0.28  | 0.18  |
| Q15042 | Rab3 GTPase-activating protein catalytic subunit                 | -0.43 | 1.33 | 1.44  | 0.92  | -0.51 | 0.16  | -0.57 | 0.71  | 0.00  | -2.11 | -0.53 | 0.50  |
| Q06203 | Amidophosphoribosyltransferase                                   | -0.43 | 0.52 | -0.98 | 0.48  | 0.26  | 0.52  | 0.39  | -0.77 | -2.19 | 1.11  | 0.66  | 0.51  |
| Q9UN70 | Protocadherin gamma-C3                                           | -0.43 | 1.99 | 2.48  | 0.04  | -0.78 | 0.34  | -0.13 | 0.28  | -1.02 | -0.31 | 0.03  | -0.94 |
| O95625 | Zinc finger and BTB domain-containing protein 11                 | -0.44 | 0.51 | -0.98 | 0.95  | -0.22 | 1.35  | -0.45 | -1.07 | -1.02 | -0.73 | 1.14  | 1.02  |
| Q00341 | Vigilin                                                          | -0.44 | 2.14 | 1.59  | 1.20  | 0.88  | -0.03 | -1.56 | -0.56 | -1.19 | -0.27 | 0.13  | -0.18 |
| P55039 | Developmentally-regulated GTP-binding protein 2                  | -0.44 | 1.41 | 1.14  | 1.58  | -0.58 | -0.52 | -0.13 | -0.49 | -0.13 | 1.35  | -1.00 | -1.22 |
| Q92878 | DNA repair protein RAD50                                         | -0.44 | 0.38 | 1.06  | 1.01  | -2.07 | 0.47  | 0.04  | 0.95  | 0.27  | -0.65 | -0.11 | -0.96 |
| P50402 | Emerin                                                           | -0.44 | 0.96 | 0.34  | 0.78  | 0.25  | 0.71  | -0.95 | 1.15  | -0.84 | -2.13 | 0.23  | 0.46  |
| P16383 | GC-rich sequence DNA-binding factor 2                            | -0.44 | 0.40 | 1.04  | 0.47  | 0.76  | -0.89 | -0.85 | -0.81 | 1.66  | -1.10 | -0.82 | 0.54  |
| Q8NDA8 | Maestro heat-like repeat-containing protein family member 1      | -0.44 | 0.48 | -0.43 | 0.33  | -0.10 | 0.71  | 0.12  | -0.41 | -2.47 | 0.35  | 0.95  | 0.94  |
| Q7Z2T5 | TRMT1-like protein                                               | -0.44 | 1.12 | 1.87  | -0.38 | -0.87 | 1.25  | -0.60 | -0.52 | -0.28 | -1.20 | 0.93  | -0.20 |
| Q9UDY2 | Tight junction protein ZO-2                                      | -0.44 | 1.25 | -1.18 | -0.50 | 1.30  | 0.52  | 1.22  | -0.69 | -1.57 | 0.01  | 0.97  | -0.09 |
| Q9GZN7 | Protein rogdi homolog                                            | -0.44 | 0.60 | 0.03  | 1.15  | 0.05  | 0.58  | -1.04 | -0.61 | -1.02 | -1.35 | 1.63  | 0.60  |
| P02452 | Collagen alpha-1(I) chain                                        | -0.44 | 0.32 | -0.02 | 0.51  | 1.72  | -0.89 | -0.88 | -0.88 | 1.45  | -1.03 | -0.34 | 0.37  |
| P61981 | 14-3-3 protein gamma                                             | -0.44 | 3.15 | 0.09  | 2.42  | -0.28 | 0.04  | 0.31  | -1.26 | 0.25  | -1.07 | -0.14 | -0.36 |
| Q9ULK4 | Mediator of RNA polymerase II transcription subunit 23           | -0.44 | 0.49 | 1.23  | 0.19  | -0.99 | -0.75 | 0.96  | 0.74  | 1.37  | -1.07 | -0.89 | -0.79 |
| Q9Y2K9 | Syntaxin-binding protein 5-like                                  | -0.44 | 0.51 | 0.90  | 0.65  | 0.09  | 0.41  | -1.38 | -0.15 | 1.11  | -2.07 | 0.10  | 0.35  |
| O60645 | Exocyst complex component 3                                      | -0.44 | 0.85 | 0.08  | -0.13 | -1.45 | 1.34  | 1.18  | -0.12 | -0.94 | -1.05 | 1.28  | -0.18 |
| Q8N9M1 | Uncharacterized protein C19orf47                                 | -0.44 | 0.71 | 2.53  | -0.48 | -0.53 | -0.27 | -0.37 | -0.38 | 0.94  | -0.80 | -0.36 | -0.28 |
| O43189 | PHD finger protein 1                                             | -0.44 | 0.51 | 1.43  | -0.25 | -1.58 | 0.29  | 0.78  | 0.17  | 0.97  | -1.60 | -0.35 | 0.14  |
| P78356 | Phosphatidylinositol 5-phosphate 4-kinase type-2 beta            | -0.44 | 0.90 | 0.58  | 1.79  | -0.78 | 0.12  | -0.66 | 0.37  | 0.38  | -2.01 | 0.30  | -0.09 |
| P40145 | Adenylyate cyclase type 8                                        | -0.44 | 0.37 | -0.83 | -0.64 | -0.67 | 1.49  | 1.15  | -1.01 | -1.05 | 0.27  | 1.30  | -0.01 |
| Q92733 | Proline-rich protein PRCC                                        | -0.44 | 0.66 | 1.60  | -0.33 | -1.11 | 0.72  | -0.06 | 0.73  | -0.91 | -1.45 | 1.03  | -0.21 |
| Q8N9T8 | Protein KRI1 homolog                                             | -0.44 | 0.62 | -0.52 | 1.25  | -0.80 | 0.12  | 0.73  | 1.97  | -0.50 | -1.06 | -0.53 | -0.66 |
| P0DP58 | Ly-6/neurotoxin-like protein 1                                   | -0.44 | 1.43 | 0.71  | 2.21  | -0.72 | -0.91 | 0.24  | -1.18 | -0.15 | 0.60  | -0.63 | -0.18 |
| Q9BTE1 | Dynactin subunit 5                                               | -0.44 | 1.74 | 0.50  | 1.03  | 0.36  | 0.49  | -0.60 | 0.29  | -0.01 | -2.39 | 0.90  | -0.57 |
| Q9BT23 | LIM domain-containing protein 2                                  | -0.45 | 0.44 | -0.57 | 1.78  | -0.84 | -0.66 | 0.87  | -0.71 | -0.68 | -0.99 | 1.10  | 0.70  |
| Q13131 | 5'-AMP-activated protein kinase catalytic subunit alpha-1        | -0.45 | 1.07 | 0.51  | 1.99  | -1.26 | 0.47  | -0.48 | 0.32  | -0.56 | -1.48 | 0.38  | 0.12  |
| P62330 | ADP-ribosylation factor 6                                        | -0.45 | 1.11 | 0.82  | 0.00  | -0.88 | 0.70  | 0.62  | -0.21 | -0.59 | -2.19 | 0.78  | 0.94  |
| Q07960 | Rho GTPase-activating protein 1                                  | -0.45 | 1.11 | -0.74 | 1.49  | -0.04 | 0.18  | 0.36  | -1.15 | 1.41  | -1.64 | 0.20  | -0.07 |
| Q8NSF7 | NF-kappa-B-activating protein                                    | -0.45 | 0.53 | 0.30  | -0.07 | -1.53 | 0.45  | 1.53  | 0.00  | 1.00  | -1.72 | 0.12  | -0.09 |
| O95970 | Leucine-rich glioma-inactivated protein 1                        | -0.45 | 0.44 | -0.99 | 1.38  | 0.81  | 0.61  | -1.23 | -1.10 | -1.15 | 0.77  | 0.54  | 0.37  |
| P13637 | Sodium/potassium-transporting ATPase subunit alpha-3             | -0.45 | 1.25 | 1.29  | 1.23  | -0.71 | -1.10 | 0.66  | 0.07  | -1.22 | -0.46 | -0.86 | 1.11  |
| P18754 | Regulator of chromosome condensation                             | -0.45 | 0.49 | 1.12  | -0.03 | -0.33 | -0.13 | 0.02  | 1.50  | -2.25 | -0.28 | 0.46  | -0.08 |

|         |                                                                    |                 |       |      |       |       |       |       |       |       |       |       |       |       |
|---------|--------------------------------------------------------------------|-----------------|-------|------|-------|-------|-------|-------|-------|-------|-------|-------|-------|-------|
| O14548  | Cytochrome c oxidase subunit 7A-related protein, mitochondrial     | COX7A2L         | -0.45 | 1.50 | 0.35  | -0.22 | -0.66 | 2.69  | -0.52 | -0.22 | 0.02  | -0.81 | -0.38 | -0.23 |
| Q86V21  | Acetoacetyl-CoA synthetase                                         | AACS            | -0.45 | 0.37 | 0.96  | 0.78  | -1.75 | 0.29  | 0.23  | 0.71  | 0.17  | -1.90 | 0.32  | 0.20  |
| Q9Y2X3  | Nucleolar protein 58                                               | NOPS8           | -0.45 | 0.62 | 0.60  | -1.51 | 0.62  | 0.75  | 0.33  | 0.26  | -1.80 | -0.84 | 0.80  | 0.80  |
| Q9UBT2  | SUMO-activating enzyme subunit 2                                   | UBA2            | -0.45 | 0.65 | 1.41  | -0.69 | -0.87 | 0.59  | 0.36  | 0.58  | -2.11 | 0.20  | 0.68  | -0.16 |
| Q9ULG1  | Chromatin-remodeling ATPase INO80                                  | INO80           | -0.45 | 0.45 | -0.74 | 0.83  | 0.72  | 0.62  | -0.84 | 1.74  | -0.80 | -1.16 | 0.54  | -0.92 |
| Q8NSM4  | Tetratricopeptide repeat protein 9C                                | TTC9C           | -0.45 | 0.61 | -0.55 | 0.66  | -0.88 | -0.25 | 1.78  | -0.70 | -0.58 | -0.99 | -0.05 | 1.56  |
| P31483  | Nucleolysin TIA-1 isoform p40                                      | TIA1            | -0.45 | 1.77 | 0.05  | -0.06 | -0.49 | -0.40 | 2.72  | -0.34 | -0.14 | -0.96 | -0.34 | -0.05 |
| Q14527  | Helicase-like transcription factor                                 | HLTF            | -0.45 | 0.78 | -0.95 | 1.32  | -0.27 | 1.00  | -0.16 | -1.14 | -1.35 | -0.42 | 1.12  | 0.84  |
| A3KN83  | Protein strawberry notch homolog 1                                 | SBNO1           | -0.45 | 0.33 | 0.19  | 1.24  | -1.03 | -0.96 | 1.02  | 0.00  | 0.35  | -1.18 | 1.37  | -1.00 |
| Q9P2E3  | NFX1-type zinc finger-containing protein 1                         | ZNFX1           | -0.46 | 0.58 | -1.51 | 0.62  | 0.89  | 0.28  | 0.45  | -2.14 | 0.14  | 0.62  | 0.16  | 0.49  |
| Q8NB37  | Glutamine amidotransferase-like class 1 domain-containing protein  | GATD1           | -0.46 | 1.39 | -0.51 | -0.33 | 0.20  | 1.30  | 0.83  | -2.04 | 0.23  | -1.02 | 0.47  | 0.87  |
| Q9NR80  | Rho guanine nucleotide exchange factor 4                           | ARHGEF4         | -0.46 | 0.22 | -0.85 | -0.37 | 1.88  | -0.02 | -0.33 | -0.77 | -0.97 | 1.70  | -0.01 | -0.26 |
| Q6DK12  | Galectin-9C                                                        | LGALS9C         | -0.46 | 1.07 | 0.10  | 1.79  | -1.55 | 0.30  | 0.57  | -0.13 | -1.27 | -0.87 | 0.60  | 0.46  |
| P22307  | Non-specific lipid-transfer protein                                | SCP2            | -0.46 | 1.20 | 0.44  | -1.15 | -0.19 | 0.32  | 1.91  | -1.55 | -0.80 | 0.56  | 0.57  | -0.11 |
| P09651  | Heterogeneous nuclear ribonucleoprotein A1                         | HNRNPA1         | -0.46 | 1.56 | 1.64  | -0.39 | -0.77 | 0.74  | 0.38  | 0.38  | -0.87 | -1.90 | 0.55  | 0.23  |
| Q9HCK4  | Roundabout homolog 2                                               | ROBO2           | -0.46 | 1.06 | 0.19  | 1.04  | -1.66 | 0.67  | 0.97  | 0.22  | 0.33  | -1.86 | 0.27  | -0.17 |
| O43252  | Bifunctional 3'-phosphoadenosine 5'-phosphosulfate synthase 1      | PAPSS1          | -0.46 | 0.49 | 1.21  | -0.89 | 0.37  | 0.87  | -0.92 | 1.23  | -0.80 | -1.19 | 0.92  | -0.79 |
| O14776  | Transcription elongation regulator 1                               | TCERG1          | -0.46 | 1.18 | 1.94  | -0.60 | -0.99 | 0.07  | 0.90  | 0.70  | -0.50 | -1.44 | 0.32  | -0.39 |
| Q9P242  | Neuronal tyrosine-phosphorylated phosphoinositide-3-kinase adaptor | NYAP2           | -0.46 | 0.53 | 0.94  | 1.32  | -1.26 | 0.82  | -1.15 | 0.37  | -0.57 | -1.39 | 0.40  | 0.50  |
| Q9UGU0  | Transcription factor 20                                            | TCF20           | -0.46 | 0.58 | -0.47 | 1.83  | 0.77  | -0.68 | -0.71 | -0.66 | -0.62 | -1.01 | 0.15  | 1.41  |
| P04424  | Argininosuccinate lyase                                            | ASL             | -0.46 | 0.65 | -0.22 | -0.49 | 2.33  | -0.31 | -0.50 | -0.40 | -0.37 | -0.86 | 1.29  | -0.48 |
| P51608  | Methyl-CpG-binding protein 2                                       | MECP2           | -0.46 | 1.58 | 0.77  | 1.16  | 1.03  | 0.45  | -1.76 | -1.03 | -0.25 | -1.13 | 0.51  | 0.26  |
| Q765P7  | Protein MTSS 2                                                     | MTSS2           | -0.46 | 0.70 | 0.26  | 0.88  | -1.54 | 1.09  | 0.18  | -1.15 | -1.32 | 0.56  | 1.08  | -0.03 |
| Q9HAN9  | Nicotinamide/nicotinic acid mononucleotide adenylyltransferase 1   | NMNAT1          | -0.46 | 1.06 | 1.52  | -0.77 | 1.11  | 0.11  | -0.77 | -0.82 | -0.68 | -1.33 | 0.94  | 0.69  |
| P51991  | Heterogeneous nuclear ribonucleoprotein A3                         | HNRNPA3         | -0.46 | 0.77 | 2.11  | -1.28 | -0.44 | 0.05  | 0.51  | -0.20 | 0.84  | -1.29 | -0.14 | -0.16 |
| P53621  | Coatomeer subunit alpha                                            | COPA            | -0.46 | 1.11 | -1.49 | 0.92  | 0.75  | 1.05  | 0.02  | -1.50 | -0.91 | -0.27 | 0.49  | 0.93  |
| Q13905  | Rap guanine nucleotide exchange factor 1                           | RAPGEF1         | -0.46 | 1.34 | 0.13  | 2.64  | -0.73 | -0.07 | -0.48 | -0.29 | -0.15 | -1.03 | 0.14  | -0.15 |
| Q71U36  | Tubulin alpha-1A chain                                             | TUBA1A          | -0.46 | 1.70 | 0.73  | 1.68  | -0.90 | 0.10  | 0.10  | 0.18  | 0.06  | -2.11 | 0.49  | -0.34 |
| Q5U5Q3  | RNA-binding E3 ubiquitin-protein ligase MEX3C                      | MEX3C           | -0.46 | 0.76 | -0.13 | -0.29 | -0.71 | -0.44 | 2.50  | -0.23 | -0.34 | -0.80 | -0.51 | 0.95  |
| O75534  | Cold shock domain-containing protein E1                            | CSDE1           | -0.46 | 0.91 | 0.51  | 0.00  | -1.39 | 0.97  | 0.98  | -0.93 | -1.51 | -0.41 | 1.00  | 0.78  |
| Q13432  | Protein unc-119 homolog A                                          | UNC119          | -0.46 | 0.44 | 0.68  | 0.93  | -1.77 | 0.70  | 0.04  | -0.14 | -1.73 | 0.67  | 0.75  | -0.12 |
| Q9P1Y6  | PHD and RING finger domain-containing protein 1                    | PHRF1           | -0.46 | 1.31 | 2.78  | -0.17 | -0.64 | -0.18 | -0.31 | -0.32 | -0.07 | -0.70 | -0.12 | -0.26 |
| Q9Y4A5  | Transformation/transcription domain-associated protein             | TRRAP           | -0.46 | 0.94 | 0.64  | -0.56 | -1.10 | 1.87  | 0.25  | -0.43 | -0.71 | -1.28 | 1.07  | 0.25  |
| Q6ZSR9  | Uncharacterized protein FLJ45252                                   | Uncharacterized | -0.46 | 0.80 | -1.10 | 0.42  | 0.64  | 0.28  | 0.73  | -1.66 | -1.48 | 0.54  | 0.66  | 0.97  |
| Q8WWY3  | U4/U6 small nuclear ribonucleoprotein Prp31                        | PRPF31          | -0.46 | 0.57 | -0.42 | -0.75 | 0.83  | 0.38  | 0.69  | -1.56 | -1.49 | 1.31  | 0.72  | 0.28  |
| P47755  | F-actin-capping protein subunit alpha-2                            | CAPZA2          | -0.46 | 2.04 | 0.58  | 1.04  | 1.64  | 0.04  | -1.35 | -0.10 | -1.40 | -0.97 | 0.36  | 0.16  |
| P13861  | cAMP-dependent protein kinase type II-alpha regulatory subunit     | PRKAR2A         | -0.46 | 0.95 | -0.94 | 1.77  | 0.14  | 0.03  | 0.10  | -2.11 | 0.22  | 0.05  | 0.09  | 0.65  |
| Q96RK0  | Protein capicua homolog                                            | CIC             | -0.46 | 2.88 | 0.47  | -0.06 | -0.52 | 0.51  | 2.01  | 0.39  | -0.08 | -1.39 | -1.45 | 0.13  |
| Q6ZLN55 | Zinc finger protein 574                                            | ZNFX5           | -0.46 | 0.36 | -0.76 | -0.08 | 0.05  | 0.22  | 1.07  | -1.50 | -1.52 | 1.43  | 0.38  | 0.71  |
| Q68D91  | Metallo-beta-lactamase domain-containing protein 2                 | MBLAC2          | -0.46 | 0.43 | -0.90 | 1.09  | -1.18 | 1.09  | 0.47  | -1.04 | -0.99 | -0.49 | 1.01  | 0.94  |
| O43752  | Syntaxin-6                                                         | STX6            | -0.46 | 0.63 | 0.13  | 1.17  | -0.27 | 0.06  | -0.29 | -0.10 | 0.70  | -2.45 | 0.09  | 0.96  |
| Q9H9H5  | MAP6 domain-containing protein 1                                   | MAP6D1          | -0.47 | 0.77 | 1.85  | -1.35 | 0.50  | 0.14  | -0.22 | -0.35 | 1.13  | -1.12 | 0.24  | -0.83 |
| Q15080  | Neutrophil cytosol factor 4                                        | NCF4            | -0.47 | 0.72 | 1.22  | 1.14  | -1.80 | -0.25 | 0.58  | 1.05  | 0.01  | -0.96 | -0.63 | -0.35 |
| Q8WWQ0  | PH-interacting protein                                             | PHIP            | -0.47 | 0.45 | 1.78  | 0.14  | -0.45 | -0.20 | -0.69 | 1.21  | 0.55  | -1.78 | -0.30 | -0.26 |
| P51617  | Interleukin-1 receptor-associated kinase 1                         | IRAK1           | -0.47 | 0.70 | 0.62  | 1.03  | -1.70 | 0.67  | 0.25  | 0.86  | -1.44 | -0.93 | 0.68  | -0.03 |
| Q01780  | Exosome component 10                                               | EXOSC10         | -0.47 | 1.14 | -1.04 | 1.20  | 0.99  | 0.83  | -0.72 | -0.63 | -0.13 | -1.76 | 0.60  | 0.65  |
| Q9BYH1  | Seizure 6-like protein                                             | SEZ6L           | -0.47 | 0.43 | -0.46 | -0.69 | 2.35  | 0.09  | -0.71 | -0.54 | -0.66 | 0.96  | -0.70 | 0.37  |
| O75915  | PRA1 family protein 3                                              | ARL6IP5         | -0.47 | 2.26 | 1.67  | 0.53  | -0.38 | -0.11 | 0.37  | -1.27 | -0.46 | -1.70 | 0.55  | 0.80  |
| O76003  | Glutaredoxin-3                                                     | GLRX3           | -0.47 | 0.80 | 0.29  | 0.13  | 0.11  | 0.85  | -0.39 | -0.24 | -1.50 | -1.65 | 0.99  | 1.41  |
| Q9Y2K2  | Serine/threonine-protein kinase SIK3                               | SIK3            | -0.47 | 0.70 | 0.20  | 1.01  | -1.38 | 0.52  | 0.52  | -1.62 | 1.13  | -1.12 | 0.20  | 0.54  |
| Q9Y3L5  | Ras-related protein Rap-2c                                         | RAP2C           | -0.47 | 1.03 | 0.12  | 1.94  | -1.15 | 0.79  | -0.51 | -0.72 | 0.55  | -1.44 | 0.33  | 0.08  |
| Q9BZX2  | Uridine-cytidine kinase 2                                          | UCK2            | -0.47 | 1.22 | 2.76  | -0.30 | -0.60 | -0.19 | -0.28 | -0.22 | -0.24 | -0.83 | -0.05 | -0.05 |
| O43676  | NADH dehydrogenase [ubiquinone] 1 beta subcomplex subunit 3        | NDUFB3          | -0.47 | 0.50 | 2.44  | -0.40 | -0.53 | -0.37 | -0.49 | -0.33 | 1.15  | -0.66 | -0.42 | -0.39 |
| P55769  | NHP2-like protein 1                                                | SNU13           | -0.47 | 0.54 | -0.77 | 0.57  | -1.04 | 0.74  | 1.18  | -0.89 | -0.83 | -1.10 | 1.26  | 0.87  |
| P30050  | 60S ribosomal protein L12                                          | RPL12           | -0.47 | 1.44 | -0.29 | 2.17  | 0.14  | -0.31 | -0.19 | -0.62 | 0.83  | -1.39 | 0.54  | -0.87 |
| Q9HA65  | TBC1 domain family member 17                                       | TBC1D17         | -0.47 | 1.61 | 0.47  | 1.28  | -1.09 | 0.04  | 0.93  | 0.35  | -0.23 | -2.19 | 0.18  | 0.25  |
| P52701  | DNA mismatch repair protein Msh6                                   | MSH6            | -0.47 | 1.14 | 0.80  | -0.12 | -1.70 | 0.75  | 1.55  | 0.09  | -1.51 | -0.07 | -0.20 | 0.40  |
| ASPKW4  | PH and SEC7 domain-containing protein 1                            | PSD             | -0.47 | 0.78 | 0.86  | -0.90 | -0.84 | 1.20  | 0.63  | -1.77 | 0.89  | -0.34 | 0.78  | -0.50 |
| Q13825  | Methylglutaconyl-CoA hydratase, mitochondrial                      | AUH             | -0.47 | 0.80 | 1.13  | -0.96 | 1.59  | 0.14  | -0.93 | 1.29  | -0.79 | -0.87 | -0.57 | -0.02 |
| Q8IWW8  | E3 ubiquitin-protein ligase UBR2                                   | UBR2            | -0.47 | 0.72 | 2.01  | 0.99  | -0.79 | -0.67 | -0.65 | 0.21  | -0.50 | -1.11 | -0.40 | 0.90  |
| P45974  | Ubiquitin carboxyl-terminal hydrolase 5                            | USP5            | -0.48 | 1.07 | 1.06  | 0.71  | -1.25 | 0.95  | -0.26 | 0.05  | 0.46  | -2.07 | 0.57  | -0.22 |
| P61006  | Ras-related protein Rab-8A                                         | RAB8A           | -0.48 | 1.69 | -0.68 | 0.95  | 0.91  | 1.36  | -0.84 | -1.17 | -1.51 | -0.10 | 0.61  | 0.47  |
| P36954  | DNA-directed RNA polymerase II subunit RPB9                        | POLR2I          | -0.48 | 0.70 | -0.47 | 0.08  | -1.03 | 1.55  | 0.73  | -0.71 | -0.83 | -1.28 | 1.00  | 0.96  |
| P49368  | T-complex protein 1 subunit gamma                                  | CCT3            | -0.48 | 0.44 | -1.47 | 0.30  | 0.35  | 0.71  | 0.69  | -1.48 | -1.34 | 0.71  | 0.87  | 0.66  |
| Q96ID5  | Immunoglobulin superfamily member 21                               | IGSF21          | -0.48 | 0.68 | -0.50 | 1.62  | -0.81 | -0.66 | 1.19  | -0.65 | -0.50 | 1.50  | -0.59 | -0.60 |
| Q7L412  | Arginine/serine-rich coiled-coil protein 2                         | RSRCL           | -0.48 | 0.83 | 1.86  | 0.42  | -1.14 | 0.06  | -0.20 | 1.27  | -1.48 | -0.30 | -0.14 | -0.35 |
| Q8IYB4  | PEX5-related protein                                               | PEX5L           | -0.48 | 2.87 | 0.83  | 0.13  | 1.88  | -0.79 | 0.35  | -1.03 | 0.38  | -1.28 | -0.98 | 0.50  |
| Q9Y5J5  | Pleckstrin homology-like domain family A member 3                  | PHLDA3          | -0.48 | 1.59 | 0.31  | -0.38 | -0.25 | 0.66  | 1.31  | 0.24  | -0.22 | -2.41 | 0.79  | -0.05 |
| Q2T1J5  | Putative coiled-coil-helix-coiled-coil domain-containing protein   | CHCHD2P9        | -0.48 | 0.49 | -0.37 | -0.42 | 2.33  | -0.40 | -0.51 | -0.42 | -0.46 | -0.71 | -0.38 | 1.34  |
| Q8IV08  | Phospholipase D3                                                   | PLD3            | -0.48 | 0.76 | -0.37 | 0.06  | -0.48 | -0.23 | 1.93  | -1.51 | -0.65 | 1.00  | 0.87  | -0.63 |
| Q2M2I8  | AP2-associated protein kinase 1                                    | AAK1            | -0.48 | 0.83 | 0.27  | 1.66  | -0.89 | 0.47  | -0.53 | -0.19 | 0.88  | -1.98 | 0.37  | -0.06 |
| Q96A23  | Copine-4                                                           | CPNE4           | -0.48 | 0.65 | 1.31  | 1.27  | -0.17 | -0.57 | -1.04 | 0.71  | 0.63  | -0.45 | 0.06  | -1.77 |
| Q9UPN7  | Serine/threonine-protein phosphatase 6 regulatory subunit 1        | PPP6R1          | -0.48 | 0.89 | 0.97  | 1.37  | -0.99 | 0.53  | -0.83 | 1.00  | 0.68  | -1.34 | -0.60 | -0.80 |
| P36957  | Dihydrolipoyllysine-residue succinyltransferase component of 2-oxo | DLST            | -0.48 | 0.85 | -0.58 | -0.12 | 1.59  | -0.62 | 0.75  | -1.79 | -0.41 | 1.18  | -0.45 | 0.46  |
| P23763  | Vesicle-associated membrane protein 1                              | VAMP1           | -0.48 | 1.06 | 1.10  | 1.07  | -0.38 | -0.49 | -0.08 | 0.02  | 1.27  | -2.11 | -0.43 | 0.04  |
| Q9UHD2  | Serine/threonine-protein kinase TBK1                               | TBK1            | -0.48 | 0.36 | 1.13  | 0.35  | -1.24 | 0.38  | -0.13 | 1.29  | 1.13  | -1.28 | -0.86 | -0.76 |
| Q49MG5  | Microtubule-associated protein 9                                   | MAP9            | -0.48 | 2.39 | 1.94  | -0.47 | -0.65 | 1.64  | -0.24 | -0.11 | -0.48 | -1.22 | -0.14 | -0.28 |
| Q86WG3  | Caytaxin                                                           | ATCAY           | -0.48 | 0.39 | -1.71 | 0.47  | 0.32  | 0.48  | 0.96  | -1.53 | -0.96 | 0.74  | 0.53  | 0.71  |
| Q8TDN6  | Ribosome biogenesis protein BRX1 homolog                           | BRX1            | -0.48 | 0.57 | -1.07 | -1.38 | 1.39  | 0.78  | 1.01  | -0.35 | -0.17 | 0.11  | 0.88  | -1.20 |
| O15498  | Synaptobrevin homolog YKT6                                         | YKT6            | -0.48 | 0.77 | -0.87 | 0.00  | 2.49  | -0.03 | -0.65 | 0.45  | -0.83 | -0.71 | -0.24 | 0.39  |
| Q9BTC0  | Death-inducer obliterator 1                                        | DIDO1           | -0.48 | 1.28 | 2.78  | -0.25 | -0.52 | -0.25 | -0.31 | -0.28 | -0.23 | -0.77 | -0.19 | 0.01  |
| Q8W264  | Arf-GAP with Rho-GAP domain, ANK repeat and PH domain-containing   | ARAP2           | -0.48 | 0.57 | 0.56  | -0.91 | -1.17 | 1.24  | 1.00  | 0.63  | -0.08 | -1.23 | 0.99  | -1.04 |
| Q2NL82  | Pre-rRNA-processing protein TSR1 homolog                           | TSR1            | -0.49 | 0.53 | 0.87  | 0.27  | -1.06 | 1.50  | -0.90 | -0.75 | -0.89 | 0.28  | 1.42  | -0.74 |

|            |                                                                          |           |       |      |       |       |       |       |       |       |       |       |       |       |
|------------|--------------------------------------------------------------------------|-----------|-------|------|-------|-------|-------|-------|-------|-------|-------|-------|-------|-------|
| Q9C0B0     | RING finger protein unkempt homolog                                      | UNK       | -0.49 | 1.21 | 0.83  | 0.31  | -0.73 | 0.95  | 0.01  | -1.16 | -1.86 | 0.85  | -0.27 | 1.09  |
| P42356     | Phosphatidylinositol 4-kinase alpha                                      | PI4KA     | -0.49 | 0.79 | 1.29  | 0.39  | 0.29  | -0.21 | -0.80 | 1.29  | 0.67  | -1.96 | -0.41 | -0.54 |
| P17480     | Nucleolar transcription factor 1                                         | UBTF      | -0.49 | 0.70 | 0.86  | -1.00 | -0.92 | 0.86  | 1.06  | -0.71 | 0.46  | -0.90 | 1.36  | -1.08 |
| Q8TB37     | Iron-sulfur protein NUBPL                                                | NUBPL     | -0.49 | 0.71 | -0.28 | -0.51 | 2.40  | -0.38 | -0.35 | -0.39 | -0.39 | -0.88 | -0.42 | 1.19  |
| P63104     | 14-3-3 protein zeta/delta                                                | YWHAZ     | -0.49 | 2.08 | -1.25 | 1.87  | 0.55  | 0.09  | 0.72  | -1.68 | -0.16 | 0.22  | 0.10  | -0.47 |
| Q9BTL3     | RNA guanine-N7 methyltransferase activating subunit                      | RAMAC     | -0.49 | 0.47 | -1.28 | 0.61  | 0.58  | 0.92  | -0.22 | -1.40 | -1.38 | 0.27  | 0.87  | 1.03  |
| Q8TAE6     | Protein phosphatase 1 regulatory subunit 14C                             | PPP1R14C  | -0.49 | 1.78 | 0.33  | 2.65  | -0.66 | -0.33 | -0.15 | -0.06 | -0.26 | -1.05 | -0.24 | -0.22 |
| P15120     | [Pyruvate dehydrogenase (acetyl-transferring)] kinase isozyme 3, PDK3    |           | -0.49 | 1.44 | -0.01 | -0.32 | -0.69 | -0.11 | 2.70  | -0.09 | -0.24 | -1.02 | -0.14 | -0.08 |
| P10114     | Ras-related protein Rap-2a                                               | RAP2A     | -0.49 | 1.79 | 0.65  | 1.37  | -1.24 | 0.93  | 0.05  | -0.56 | -0.06 | -1.86 | 0.71  | 0.01  |
| P52594     | Arf-GAP domain and FG repeat-containing protein 1                        | AGF51     | -0.49 | 1.21 | -0.72 | 1.54  | -1.06 | 0.78  | 0.80  | -0.62 | -0.36 | -1.47 | 1.02  | 0.10  |
| Q81UQ0     | Clavesin-1                                                               | CLV51     | -0.49 | 0.52 | -1.14 | 1.46  | -1.06 | 1.18  | 0.23  | -0.85 | -0.08 | -0.17 | 1.26  | -0.81 |
| O43236     | Septin-4                                                                 | SEPTIN4   | -0.49 | 1.20 | 1.19  | 0.44  | 1.02  | -0.82 | -0.51 | 0.81  | 1.00  | -1.03 | -0.55 | -1.55 |
| Q9H3U1     | Protein unc-45 homolog A                                                 | UNC45A    | -0.49 | 0.59 | 0.54  | 0.46  | -1.13 | 0.30  | 0.57  | 0.88  | -0.62 | -2.20 | 0.42  | 0.77  |
| P49441     | Inositol polyphosphate 1-phosphatase                                     | INPP1     | -0.49 | 0.61 | -1.09 | 0.16  | 0.35  | 0.93  | 0.43  | -1.19 | -1.80 | 0.27  | 0.94  | 1.00  |
| Q8IV01     | Synaptotagmin-12                                                         | SYT12     | -0.49 | 0.65 | -1.03 | 0.75  | 0.74  | 0.68  | -0.31 | -1.40 | -1.50 | 1.12  | 0.89  | 0.08  |
| Q13614     | Myotubularin-related protein 2                                           | MTMR2     | -0.49 | 0.91 | 0.59  | 0.00  | -0.05 | 0.86  | -0.30 | 1.19  | 0.21  | -2.51 | 0.20  | -0.19 |
| Q9Y2J8     | Protein-arginine deiminase type-2                                        | PADI2     | -0.49 | 0.42 | -1.79 | 1.19  | 0.10  | 0.81  | 0.24  | -0.74 | -1.24 | -0.29 | 0.85  | 0.87  |
| Q96KN1     | Protein LRATD2                                                           | LRATD2    | -0.49 | 0.61 | 1.25  | -0.70 | -0.73 | -0.33 | 1.28  | 0.55  | 0.78  | -1.58 | -1.01 | 0.50  |
| P16455     | Methylated-DNA--protein-cysteine methyltransferase                       | MGMT      | -0.49 | 0.53 | 0.17  | 0.79  | -1.24 | 0.16  | 0.81  | 0.37  | -1.15 | -1.49 | 0.03  | 1.56  |
| Q53RE8     | Ankyrin repeat domain-containing protein 39                              | ANKRD39   | -0.49 | 1.81 | 0.19  | -0.32 | -0.66 | 0.01  | 2.64  | -0.03 | -0.40 | -1.09 | -0.28 | -0.05 |
| Q8WKF7     | Atlastin-1                                                               | ATL1      | -0.49 | 0.64 | 1.00  | 0.85  | -0.16 | 0.11  | -1.00 | 0.97  | 1.17  | -1.75 | -0.33 | -0.87 |
| Q9H4A5     | Golgi phosphoprotein 3-like                                              | GOLPH3L   | -0.49 | 0.77 | -0.48 | 0.08  | 1.37  | 0.99  | -1.04 | 0.08  | -0.92 | -1.32 | -0.23 | 1.47  |
| Q8T477     | BTB/POZ domain-containing protein KCTD18                                 | KCTD18    | -0.49 | 0.58 | 0.47  | 1.12  | -1.71 | 0.72  | 0.13  | -1.65 | -0.42 | -0.17 | 0.75  | 0.75  |
| P53779     | Mitogen-activated protein kinase 10                                      | MAPK10    | -0.50 | 1.07 | 0.54  | 1.20  | -1.13 | 0.53  | 0.07  | 0.01  | 0.88  | -2.21 | 0.20  | -0.08 |
| Q9UBP4     | Dickkopf-related protein 3                                               | DKK3      | -0.50 | 0.57 | 1.12  | -0.22 | 0.82  | -0.03 | -0.97 | -0.78 | -0.83 | 2.00  | -0.28 | -0.83 |
| Q86V97     | Kelch repeat and BTB domain-containing protein 6                         | KBTBD6    | -0.50 | 0.47 | -0.06 | 1.47  | 0.71  | -1.68 | 0.16  | 0.33  | -0.10 | 0.49  | -1.72 | 0.38  |
| Q96M96     | FYVE, RhoGEF and PH domain-containing protein 4                          | FYVE      | -0.50 | 0.40 | 1.89  | 0.49  | -1.32 | 0.05  | -0.58 | 0.84  | -0.30 | -1.47 | 0.00  | 0.40  |
| Q9P2E9     | Ribosome-binding protein 1                                               | RRBP1     | -0.50 | 0.60 | -0.01 | -0.36 | 0.41  | 0.90  | -0.17 | -1.79 | -1.54 | 0.92  | 0.98  | 0.67  |
| A2RUS2     | DENN domain-containing protein 3                                         | DENND3    | -0.50 | 0.63 | -0.53 | 1.58  | -0.94 | -0.79 | 1.47  | 0.89  | -0.78 | -1.02 | 0.30  | -0.19 |
| Q96K55     | KIF1-binding protein                                                     | KIF1BP    | -0.50 | 0.69 | 1.01  | -0.23 | -0.81 | 0.21  | 0.68  | 0.24  | 0.18  | -2.40 | 0.94  | 0.18  |
| Q96JM2     | Zinc finger protein 462                                                  | ZNF462    | -0.50 | 0.99 | -0.04 | -0.38 | -0.54 | -0.37 | 2.49  | 0.89  | -0.23 | -1.01 | -0.45 | -0.37 |
| Q9Y2V7     | Conserved oligomeric Golgi complex subunit 6                             | COG6      | -0.50 | 0.58 | -0.03 | 0.53  | -1.14 | 1.07  | 0.32  | 0.12  | -0.90 | -1.86 | 0.74  | 1.16  |
| Q03164     | Histone-lysine N-methyltransferase 2A                                    | KMT2A     | -0.50 | 0.87 | 0.21  | -0.50 | -0.72 | 2.46  | -0.40 | -0.53 | -0.49 | -0.90 | 0.79  | 0.09  |
| Q12986     | Transcriptional repressor NF-X1                                          | NFX1      | -0.50 | 0.58 | -0.98 | 0.50  | 0.41  | 0.52  | 0.29  | -2.28 | 1.40  | -0.14 | 0.05  | 0.23  |
| P61011     | Signal recognition particle 54 kDa protein                               | SRP54     | -0.50 | 0.75 | -0.49 | -0.60 | 0.89  | 0.87  | 0.24  | 0.40  | -0.30 | -2.31 | 0.19  | 1.10  |
| P18031     | Tyrosine-protein phosphatase non-receptor type 1                         | PTPN1     | -0.50 | 0.71 | -0.33 | 1.12  | 0.19  | 0.53  | -0.63 | 0.05  | -0.40 | -2.19 | 0.27  | 1.38  |
| Q02778     | C-X-C motif chemokine 10                                                 | CXCL10    | -0.50 | 0.43 | -1.16 | 1.36  | 0.62  | -0.29 | 0.04  | -1.26 | -1.19 | 1.48  | 0.00  | 0.40  |
| Q00013     | 55 kDa erythrocyte membrane protein                                      | MPP1      | -0.50 | 0.83 | 1.13  | 0.86  | -0.62 | 0.38  | -0.76 | 1.23  | -0.97 | -1.70 | 0.68  | -0.24 |
| P27816     | Microtubule-associated protein 4                                         | MAP4      | -0.50 | 1.03 | 1.95  | 0.04  | 0.65  | -0.50 | -0.97 | 0.79  | 0.39  | -1.58 | -0.35 | -0.42 |
| P46379     | Large proline-rich protein BAG6                                          | BAG6      | -0.50 | 0.49 | 1.22  | 0.24  | -0.66 | 0.17  | -0.33 | 1.23  | 0.93  | -2.05 | -0.32 | -0.44 |
| Q9UK58     | Cyclin-L1                                                                | CCNL1     | -0.50 | 0.40 | 0.13  | -0.67 | -0.79 | -0.59 | 2.45  | -0.56 | 0.73  | -0.84 | 0.11  | 0.01  |
| Q04837     | Single-stranded DNA-binding protein, mitochondrial                       | SSBP1     | -0.51 | 1.60 | -0.43 | 0.05  | 2.09  | 0.28  | -0.35 | -1.79 | -0.34 | 0.90  | -0.06 | -0.35 |
| Q9COA0     | Contactin-associated protein-like 4                                      | CNTNAP4   | -0.51 | 0.65 | -1.95 | 1.25  | 0.32  | 0.59  | 0.60  | -1.43 | -0.06 | -0.39 | 0.41  | 0.65  |
| P18615     | Negative elongation factor E                                             | NELFE     | -0.51 | 1.03 | 1.13  | -0.81 | -0.38 | 0.31  | 0.18  | 1.04  | -0.52 | -2.22 | 0.70  | -0.20 |
| Q96F07     | Cytoplasmic FMR1-interacting protein 2                                   | CYFIIP2   | -0.51 | 0.88 | -0.40 | -0.44 | -0.50 | 0.14  | 2.25  | -0.46 | 1.15  | 0.10  | -0.72 | -1.12 |
| Q8TAC9     | Secretory carrier-associated membrane protein 5                          | SCAMP5    | -0.51 | 1.06 | 0.90  | 1.46  | -1.27 | 0.61  | -1.21 | -0.25 | 0.69  | -1.38 | 0.38  | 0.09  |
| Q70CQ4     | Ubiquitin carboxyl-terminal hydrolase 31                                 | USP31     | -0.51 | 0.35 | 0.09  | 0.65  | -1.00 | 0.96  | 0.51  | 1.24  | -0.89 | -1.78 | 0.78  | -0.56 |
| P51812     | Ribosomal protein S6 kinase alpha-3                                      | RPS6KA3   | -0.51 | 1.04 | 0.19  | 1.06  | -0.52 | 0.44  | 0.03  | 0.35  | 0.23  | -2.62 | 0.50  | 0.34  |
| P51157     | Ras-related protein Rab-28                                               | RAB28     | -0.51 | 0.64 | -0.43 | 0.82  | -1.72 | 0.98  | 1.15  | 0.11  | -1.49 | 0.06  | 0.77  | -0.25 |
| Q92556     | Engulfment and cell motility protein 1                                   | ELMO1     | -0.51 | 1.15 | 0.54  | 0.73  | -0.81 | 0.82  | 0.02  | 0.55  | 0.00  | -2.17 | 1.11  | -0.79 |
| Q07666     | KH domain-containing, RNA-binding, signal transduction-associate KHDRBS1 | KHDRBS1   | -0.51 | 1.21 | 1.53  | -0.85 | -1.23 | 0.48  | 1.43  | -0.26 | -0.68 | -1.07 | 0.69  | -0.03 |
| P19784     | Casein kinase II subunit alpha'                                          | CSNK2A2   | -0.51 | 0.63 | 0.03  | 1.79  | -0.23 | 0.23  | -1.02 | 0.86  | -0.14 | -1.95 | 0.17  | 0.28  |
| P07954     | Fumarate hydratase, mitochondrial                                        | FH        | -0.51 | 0.75 | -0.96 | 1.14  | 0.81  | 0.91  | -0.98 | -0.55 | -0.64 | 0.21  | -1.31 | 1.37  |
| AOA0J9YX94 | Paraneoplastic antigen Ma6f                                              | PNMA6F    | -0.51 | 0.80 | -0.22 | 2.57  | -0.65 | -0.36 | -0.36 | -0.31 | -0.42 | -0.82 | -0.23 | 0.80  |
| Q13485     | Mothers against decapentaplegic homolog 4                                | SMAD4     | -0.51 | 0.62 | -1.60 | 0.70  | 1.06  | 0.74  | -0.12 | -0.39 | -1.84 | 0.52  | 0.56  | 0.38  |
| Q96QR8     | Transcriptional activator protein Pur-beta                               | PURB      | -0.51 | 3.63 | 0.94  | 1.05  | -0.72 | 0.90  | 0.58  | -1.31 | 0.45  | -1.78 | 0.30  | -0.43 |
| Q9NRR3     | CDC42 small effector protein 2                                           | CDC42SE2  | -0.51 | 0.45 | 0.80  | 1.49  | -1.10 | 0.48  | -1.07 | 0.40  | 0.71  | -1.26 | 0.55  | -0.99 |
| Q96T51     | RUN and FYVE domain-containing protein 1                                 | RUFY1     | -0.51 | 0.75 | 0.12  | -0.21 | 0.55  | 0.18  | 0.31  | -0.08 | -2.29 | -0.57 | 0.32  | 1.68  |
| Q5T1M5     | FK506-binding protein 15                                                 | FKBP15    | -0.51 | 0.78 | -0.24 | 1.12  | -0.62 | 0.52  | 0.18  | 0.01  | 0.36  | -2.42 | 0.10  | 0.99  |
| P19367     | Hexokinase-1                                                             | HK1       | -0.51 | 0.54 | 1.09  | 0.97  | -1.56 | -0.76 | 0.96  | 0.72  | 0.70  | -0.16 | -0.86 | -1.10 |
| P60953     | Cell division control protein 42 homolog                                 | CDC42     | -0.51 | 1.18 | 0.08  | 1.10  | -0.33 | 0.59  | -0.11 | -1.25 | -1.65 | 1.65  | 0.35  | -0.44 |
| Q17RD7     | Synaptotagmin-16                                                         | SYT16     | -0.51 | 1.11 | 2.79  | -0.33 | -0.60 | -0.22 | -0.33 | -0.30 | -0.03 | -0.67 | -0.07 | -0.23 |
| Q9Y6Y8     | SEC23-interacting protein                                                | SEC23IP   | -0.51 | 0.75 | 0.53  | 0.46  | -0.24 | 0.60  | -0.43 | -0.89 | 1.32  | -2.24 | 0.46  | 0.42  |
| Q5TH69     | Brefeldin A-inhibited guanine nucleotide-exchange protein 3              | ARFGEP3   | -0.51 | 0.87 | 0.95  | 0.78  | -0.48 | 0.26  | -0.46 | 0.89  | 1.03  | -1.99 | 0.10  | -1.08 |
| Q02556     | Interferon regulatory factor 8                                           | IRF8      | -0.51 | 1.01 | 0.42  | 0.82  | -0.92 | -0.65 | 1.49  | -0.52 | -0.63 | -0.94 | -0.68 | 1.62  |
| Q08495     | Dematin                                                                  | DMTN      | -0.51 | 0.86 | 0.39  | 0.32  | -1.92 | 0.74  | 1.51  | -0.56 | 0.32  | -1.25 | 0.51  | -0.05 |
| Q07002     | Cyclin-dependent kinase 18                                               | CDK18     | -0.51 | 0.99 | 0.86  | -0.38 | -0.81 | 0.95  | 0.54  | -0.57 | 1.36  | -1.63 | 0.69  | -0.99 |
| Q9NUJ1     | Mycophenolic acid acyl-glucuronide esterase, mitochondrial               | ABHD10    | -0.51 | 0.34 | -0.78 | -1.32 | 0.39  | 1.17  | 1.00  | -0.74 | -1.34 | -0.20 | 1.10  | 0.71  |
| Q9UKB3     | DnaJ homolog subfamily C member 12                                       | DNAJC12   | -0.51 | 0.93 | -0.46 | 1.73  | 0.48  | -0.82 | 0.15  | -0.89 | -0.76 | -1.21 | 0.41  | 1.37  |
| Q9BVB3     | Monoacylglycerol lipase ABHD6                                            | ABHD6     | -0.52 | 0.95 | 0.38  | 0.44  | -1.04 | 1.25  | 0.09  | -0.73 | -1.55 | -0.90 | 1.28  | 0.80  |
| Q99798     | Aconitate hydratase, mitochondrial                                       | ACO2      | -0.52 | 2.14 | -0.70 | 1.27  | 1.75  | -0.06 | -0.26 | -1.56 | -0.36 | 0.72  | 0.02  | -0.83 |
| Q9NRA8     | Eukaryotic translation initiation factor 4E transporter                  | EIF4ENIF1 | -0.52 | 1.20 | 1.12  | -0.12 | -0.47 | 0.69  | 0.12  | 1.29  | 0.97  | -1.00 | -1.43 | -1.17 |
| Q81WU2     | Serine/threonine-protein kinase LMTK2                                    | LMTK2     | -0.52 | 0.61 | 1.38  | -0.93 | -1.47 | 0.46  | 1.33  | 0.12  | -1.25 | 0.58  | 0.15  | -0.38 |
| P09132     | Signal recognition particle 19 kDa protein                               | SRP19     | -0.52 | 0.92 | 0.41  | -0.73 | 0.95  | -0.99 | 1.44  | -0.85 | -1.68 | 0.23  | 0.43  | 0.78  |
| Q96F22     | Abasic site processing protein HMCES                                     | HMCES     | -0.52 | 1.49 | 2.75  | -0.27 | -0.57 | 0.02  | -0.31 | -0.15 | -0.27 | -0.89 | -0.16 | -0.16 |
| Q9POL1     | Zinc finger protein with KRAB and SCAN domains 7                         | ZKSCAN7   | -0.52 | 0.71 | 0.80  | -1.38 | 0.60  | 0.45  | 0.41  | -0.65 | -0.20 | -1.18 | 1.85  | -0.69 |
| Q81ZH2     | 5'-3' exonuclease 1                                                      | XRN1      | -0.52 | 0.61 | 1.89  | -1.40 | -0.15 | 0.24  | 0.18  | 0.23  | -0.05 | -1.69 | 0.07  | 0.66  |
| Q8IXS6     | Paralemmin-2                                                             | PALM2     | -0.52 | 0.71 | 1.22  | 1.15  | -0.30 | 0.40  | -1.60 | 0.38  | 0.75  | -1.57 | -0.03 | -0.41 |
| P54646     | 5'-AMP-activated protein kinase catalytic subunit alpha-2                | PRKAA2    | -0.52 | 1.38 | -0.13 | -0.96 | 0.27  | 1.00  | 1.30  | -1.29 | -0.92 | 0.54  | 1.22  | -1.02 |
| O96019     | Actin-like protein 6A                                                    | ACTL6A    | -0.52 | 0.84 | -0.42 | 1.37  | -1.58 | 0.51  | 1.13  | 0.09  | -1.36 | -0.73 | 0.60  | 0.41  |
| Q13151     | Heterogeneous nuclear ribonucleoprotein A0                               | HNRNPA0   | -0.52 | 0.62 | 1.17  | -1.46 | -1.12 | 0.80  | 1.40  | -0.07 | -1.01 | -0.34 | 0.71  | -0.07 |
| Q4G0F5     | Vacuolar protein sorting-associated protein 26B                          | VPS26B    | -0.52 | 2.00 | 0.90  | 1.15  | -0.48 | 0.60  | -0.24 | -1.21 | 0.21  | -2.01 | 0.76  | 0.31  |
| Q15029     | 116 kDa U5 small nuclear ribonucleoprotein component                     | EFTUD2    | -0.52 | 0.80 | 0.55  | 0.33  | 0.31  | 1.12  | -1.36 | 0.46  | -1.29 | -1.57 | 0.77  | 0.66  |

|        |                                                                          |           |       |      |       |       |       |       |       |       |       |       |       |       |
|--------|--------------------------------------------------------------------------|-----------|-------|------|-------|-------|-------|-------|-------|-------|-------|-------|-------|-------|
| Q8NCG7 | Sn1-specific diacylglycerol lipase beta                                  | DAGLB     | -0.52 | 1.67 | -0.02 | 2.77  | -0.47 | -0.18 | -0.33 | -0.28 | -0.11 | -0.84 | -0.19 | -0.35 |
| O95372 | Acyl-protein thioesterase 2                                              | LYPLA2    | -0.52 | 0.64 | -1.08 | 1.47  | 0.20  | 0.69  | -0.48 | -1.13 | -1.20 | -0.42 | 0.72  | 1.23  |
| Q9P2S2 | Neurexin-2                                                               | NRXN2     | -0.52 | 1.31 | -0.43 | 1.38  | -0.90 | -0.45 | 1.82  | -0.54 | -0.63 | 1.03  | -0.63 | -0.65 |
| Q86VP1 | Tax1-binding protein 1                                                   | TAX1BP1   | -0.52 | 1.11 | -0.33 | -0.82 | 0.59  | 1.04  | 0.77  | -1.66 | -1.06 | 0.74  | 1.23  | -0.51 |
| Q7ZSK2 | Wings apart-like protein homolog                                         | WAPL      | -0.52 | 0.45 | 0.27  | -1.48 | 1.73  | -0.13 | 0.20  | 0.53  | -0.06 | 0.73  | -0.11 | -1.69 |
| P5R3F8 | Protein phosphatase 1 regulatory subunit 29                              | ELFN2     | -0.52 | 0.83 | 1.59  | 0.20  | -0.76 | 0.49  | -0.53 | -0.62 | 1.79  | -1.04 | -0.69 | -0.43 |
| W78362 | SRSF protein kinase 2                                                    | SRPK2     | -0.52 | 1.06 | 1.04  | 0.82  | -1.13 | -0.03 | 0.51  | -2.21 | 0.30  | 0.84  | -0.21 | 0.07  |
| Q01581 | Hydroxymethylglutaryl-CoA synthase, cytoplasmic                          | HMGCS1    | -0.52 | 0.59 | -1.26 | 0.43  | 0.50  | 0.97  | 0.13  | -1.85 | -1.00 | 0.47  | 0.97  | 0.66  |
| P84101 | Small EDRK-rich factor 2                                                 | SERF2     | -0.53 | 0.84 | -0.84 | -0.11 | 1.93  | 0.47  | -0.45 | -1.15 | -1.00 | -0.54 | 0.65  | 1.05  |
| Q9NW68 | BSD domain-containing protein 1                                          | BSDC1     | -0.53 | 1.07 | 0.07  | 1.92  | -1.05 | 1.02  | -0.74 | -0.79 | -0.06 | -1.22 | 0.67  | 0.18  |
| Q9H2U1 | ATP-dependent DNA/RNA helicase DHX36                                     | DHX36     | -0.53 | 1.62 | -0.74 | 1.92  | 0.60  | 0.72  | -0.84 | 0.36  | -1.26 | -1.11 | 0.48  | -0.13 |
| O14647 | Chromodomain-helicase-DNA-binding protein 2                              | CHD2      | -0.53 | 1.38 | 0.75  | 1.56  | -1.39 | 0.11  | 0.44  | -0.76 | 0.10  | -1.58 | -0.10 | 0.87  |
| P04216 | Thy-1 membrane glycoprotein                                              | THY1      | -0.53 | 1.56 | -0.12 | 0.64  | -0.02 | 0.79  | 0.38  | -1.63 | -1.93 | 0.77  | 0.87  | 0.25  |
| O00217 | NADH dehydrogenase [ubiquinone] iron-sulfur protein 8, mitochondrion     | NDUFS8    | -0.53 | 1.36 | 2.77  | -0.27 | -0.60 | -0.07 | -0.31 | -0.10 | -0.27 | -0.79 | -0.19 | -0.16 |
| Q08722 | Leukocyte surface antigen CD47                                           | CD47      | -0.53 | 0.50 | -1.04 | 0.64  | -0.21 | 0.88  | 0.38  | -2.37 | 0.39  | 0.17  | 0.75  | 0.41  |
| P29350 | Tyrosine-protein phosphatase non-receptor type 6                         | PTPN6     | -0.53 | 0.37 | -1.06 | 0.27  | 0.61  | 0.61  | 0.07  | -1.59 | -1.50 | 0.84  | 0.77  | 0.98  |
| Q15036 | Sorting nexin-17                                                         | SNX17     | -0.53 | 1.19 | 0.99  | 0.72  | -1.18 | 0.48  | 0.30  | 1.01  | -1.81 | -1.10 | 0.51  | 0.07  |
| Q5T011 | KICSTOR complex protein SZT2                                             | SZT2      | -0.53 | 0.58 | 0.30  | -0.85 | -1.01 | 0.97  | 1.33  | -0.81 | 1.11  | -1.21 | 0.83  | -0.66 |
| Q9U1S9 | Methyl-CpG-binding domain protein 1                                      | MBD1      | -0.53 | 0.62 | 0.85  | -1.04 | -1.14 | 0.35  | 1.76  | -0.72 | -1.00 | 0.36  | 0.95  | -0.37 |
| O15042 | U2 snRNP-associated SURP motif-containing protein                        | UZSURP    | -0.53 | 0.63 | 0.59  | 1.03  | -2.31 | 0.76  | 0.74  | 0.01  | 0.19  | -0.90 | 0.32  | -0.42 |
| Q86TX2 | Acyl-coenzyme A thioesterase 1                                           | ACOT1     | -0.53 | 1.56 | -0.96 | -1.04 | 1.01  | 0.68  | 1.96  | -0.67 | -0.79 | -0.62 | 0.01  | 0.43  |
| O43933 | Peroxisome biogenesis factor 1                                           | PEX1      | -0.53 | 1.96 | 0.36  | 2.60  | -0.50 | -0.26 | -0.25 | -0.15 | -0.23 | -1.23 | -0.39 | 0.05  |
| Q9NZ45 | CDGSH iron-sulfur domain-containing protein 1                            | CISD1     | -0.53 | 1.52 | 0.65  | 0.65  | 0.33  | 0.62  | -0.63 | -1.14 | -0.26 | -2.03 | 0.68  | 1.13  |
| A5YM72 | Carnosine synthase 1                                                     | CARN1S1   | -0.53 | 0.70 | 0.16  | -0.58 | 0.31  | 1.40  | -0.41 | 0.09  | -0.87 | 0.16  | 1.55  | -1.80 |
| Q9NW82 | WD repeat-containing protein 70                                          | WDR70     | -0.53 | 0.56 | -0.20 | 0.25  | -0.96 | 0.65  | 0.98  | -1.12 | -1.18 | -0.85 | 0.85  | 1.58  |
| Q92752 | Tenascin-R                                                               | TNR       | -0.53 | 1.25 | -0.12 | -0.78 | 0.17  | 0.86  | 1.24  | -1.30 | -1.35 | 0.81  | 1.18  | -0.71 |
| Q9Y217 | 1-phosphatidylinositol 3-phosphate 5-kinase                              | PIKPYVE   | -0.53 | 0.72 | 0.10  | 1.48  | 0.55  | 0.63  | -1.87 | -0.52 | -1.05 | 0.43  | 0.83  | -0.58 |
| O94818 | Nucleolar protein 4                                                      | NOL4      | -0.53 | 0.87 | -0.95 | 0.69  | -0.72 | 1.25  | 0.77  | -1.31 | -1.11 | -0.48 | 1.06  | 0.80  |
| O75335 | Liprin-alpha-4                                                           | PPFIA4    | -0.53 | 0.82 | 0.63  | 1.45  | -0.86 | 0.34  | -0.58 | 1.09  | -0.01 | -2.03 | -0.08 | 0.03  |
| Q16778 | Histone H2B type 2-E                                                     | HIST2H2BE | -0.54 | 0.79 | 0.63  | -0.84 | 1.81  | -0.40 | -0.26 | 0.14  | -1.99 | 0.17  | 0.13  | 0.60  |
| Q9BUH6 | Protein PAXX                                                             | PAXX      | -0.54 | 1.44 | -0.06 | -0.30 | -0.63 | 2.75  | -0.17 | -0.27 | -0.07 | -0.89 | -0.17 | -0.18 |
| Q9P0M6 | Core histone macro-H2A.2                                                 | H2AFY2    | -0.54 | 0.88 | 0.66  | -0.85 | 1.41  | -0.52 | 0.35  | 0.66  | -0.52 | -2.09 | 0.46  | 0.44  |
| P62070 | Ras-related protein R-Ras2                                               | RRAS2     | -0.54 | 0.89 | -0.95 | 0.33  | -0.71 | 0.86  | 1.53  | 0.56  | -0.89 | -1.65 | 0.74  | 0.21  |
| Q7L7X3 | Serine/threonine-protein kinase TAO1                                     | TAOK1     | -0.54 | 0.65 | -0.08 | 0.03  | -0.72 | 0.73  | 0.86  | -0.16 | 0.87  | -2.40 | 0.81  | 0.06  |
| Q9H270 | Vacuolar protein sorting-associated protein 11 homolog                   | VPS11     | -0.54 | 1.07 | -1.81 | 0.37  | 1.21  | 1.09  | 0.35  | -1.04 | -0.75 | -0.01 | 1.00  | -0.41 |
| Q3KR37 | Protein Aster-B                                                          | GRAMD1B   | -0.54 | 0.37 | -0.97 | 0.70  | 0.09  | 0.62  | 0.07  | -1.06 | -1.87 | 1.42  | 0.67  | 0.34  |
| O00468 | Agtrin                                                                   | AGRIN     | -0.54 | 0.78 | -0.20 | 1.04  | 1.62  | -0.32 | -1.19 | 0.17  | -1.76 | 0.42  | -0.33 | 0.55  |
| Q96ST3 | Paired amphipathic helix protein Sin3a                                   | SIN3A     | -0.54 | 0.72 | 0.90  | 0.25  | 0.03  | 0.57  | -0.86 | 0.43  | 0.55  | -2.52 | 0.38  | 0.27  |
| Q9UKA9 | Polypyrimidine tract-binding protein 2                                   | PTBP2     | -0.54 | 1.68 | 1.08  | -0.25 | 0.26  | 1.21  | -0.59 | 0.00  | -0.58 | -2.24 | 0.85  | 0.06  |
| P13073 | Cytochrome c oxidase subunit 4 isoform 1, mitochondrial                  | COX4I1    | -0.54 | 1.59 | 0.43  | 0.37  | 0.03  | 0.47  | 0.42  | 0.51  | 0.44  | -0.32 | -2.75 | 0.40  |
| Q9P016 | Thymocyte nuclear protein 1                                              | THYN1     | -0.54 | 2.71 | 1.32  | 0.36  | -1.15 | 0.00  | 1.86  | -0.57 | -0.98 | -0.24 | 0.34  | -0.94 |
| Q86WJ1 | Chromodomain-helicase-DNA-binding protein 1-like                         | CHD1L     | -0.54 | 0.74 | 0.46  | -1.82 | 0.54  | 1.00  | 0.72  | 0.14  | 0.15  | -0.23 | 0.76  | -1.73 |
| Q04323 | UBX domain-containing protein 1                                          | UBXN1     | -0.54 | 1.90 | -0.02 | 2.14  | -0.63 | 0.62  | -0.26 | -0.23 | -1.28 | -1.21 | 0.59  | 0.28  |
| Q9HAL7 | SWI/SNF-related matrix-associated actin-dependent regulator of cSMARCAD1 | AIDA      | -0.54 | 0.84 | 2.55  | -0.43 | -0.54 | -0.24 | -0.33 | -0.42 | 0.89  | -0.82 | -0.29 | -0.37 |
| Q96B33 | Axin interactor, dorsalization-associated protein                        | CIT       | -0.54 | 2.18 | 0.99  | -0.41 | 0.10  | -0.17 | 1.51  | 0.13  | -2.28 | -0.38 | 0.09  | 0.41  |
| O14578 | Citron Rho-interacting kinase                                            | RG57      | -0.54 | 0.52 | 1.18  | 0.34  | -0.78 | -0.10 | 0.02  | 1.14  | 0.83  | -2.18 | -0.21 | -0.26 |
| P49802 | Regulator of G-protein signaling 7                                       | RGS7      | -0.54 | 1.29 | 0.52  | 1.68  | -0.90 | 0.04  | 0.05  | 0.14  | 0.87  | -2.01 | 0.12  | -0.53 |
| Q9H477 | Ribokinase                                                               | RBKS      | -0.54 | 1.06 | 1.38  | -0.83 | -1.18 | 0.77  | 1.08  | -0.85 | -0.76 | 0.70  | -0.99 | 0.70  |
| P11233 | Ras-related protein Ral-A                                                | RALA      | -0.54 | 3.54 | 0.21  | 0.80  | 1.20  | 0.22  | 0.42  | -2.57 | 0.00  | -0.03 | -0.19 | -0.06 |
| A6NHX0 | Cytosolic arginine sensor for mTORC1 subunit 2                           | CASTOR2   | -0.55 | 1.31 | -0.15 | 0.43  | 0.35  | 0.69  | 0.16  | -2.39 | -0.93 | 0.34  | 1.15  | 0.36  |
| O10451 | Osteopontin                                                              | SPP1      | -0.55 | 0.44 | 0.19  | 1.48  | 0.17  | -0.58 | -0.68 | -0.70 | -0.68 | 2.05  | -0.64 | -0.62 |
| Q96P16 | Regulation of nuclear pre-mRNA domain-containing protein 1A              | RPRD1A    | -0.55 | 0.65 | 1.56  | -0.83 | -1.02 | 0.62  | 0.49  | -0.18 | 1.49  | -1.26 | -0.48 | -0.39 |
| Q12905 | Interleukin enhancer-binding factor 2                                    | ILF2      | -0.55 | 0.97 | -0.99 | 1.03  | 0.34  | 0.69  | 0.06  | -1.88 | -0.82 | 1.31  | 0.57  | -0.31 |
| Q8N142 | Adenylosuccinate synthetase isozyme 1                                    | ADSS1     | -0.55 | 0.50 | -1.61 | 0.44  | -0.27 | 0.90  | 1.19  | -0.31 | -1.70 | 0.43  | 0.88  | 0.05  |
| Q9H726 | Histone acetyltransferase KAT8                                           | KAT8      | -0.55 | 0.70 | 0.86  | -0.87 | 0.58  | 0.11  | 0.20  | -0.98 | 1.83  | -1.34 | 0.49  | -0.88 |
| Q8TD10 | Chromodomain-helicase-DNA-binding protein 5                              | CHD5      | -0.55 | 1.99 | 0.33  | -0.36 | 2.62  | -0.10 | -0.52 | -0.21 | -0.29 | -1.17 | -0.34 | 0.03  |
| Q96NT1 | Nucleosome assembly protein 1-like 5                                     | NAP1L5    | -0.55 | 0.54 | 1.18  | 0.68  | -1.57 | 0.11  | 0.29  | -0.17 | 1.36  | -1.63 | -0.11 | -0.15 |
| Q9UJ68 | Mitochondrial peptide methionine sulfoxide reductase                     | MSRA      | -0.55 | 1.02 | -0.83 | 0.45  | 0.39  | 0.68  | 0.50  | -0.10 | -2.51 | 0.81  | 0.49  | 0.11  |
| Q5QP82 | DDB1- and CUL4-associated factor 10                                      | DCAF10    | -0.55 | 0.80 | -0.75 | -0.96 | 0.64  | 1.32  | 0.70  | -0.78 | 1.61  | 0.01  | -1.01 | -0.78 |
| Q01432 | AMP deaminase 3                                                          | AMPD3     | -0.55 | 1.00 | -0.18 | 0.47  | -0.68 | 0.94  | 0.23  | -2.02 | -1.32 | 1.19  | 0.57  | 0.40  |
| Q9UBL3 | Set1/Ash2 histone methyltransferase complex subunit ASH2                 | ASH2L     | -0.55 | 0.77 | 0.88  | 0.71  | -0.28 | 0.74  | -0.71 | 0.46  | -2.25 | -0.29 | 0.88  | 0.26  |
| Q86VW2 | Rho guanine nucleotide exchange factor 25                                | ARHGGEF25 | -0.55 | 1.20 | 2.76  | -0.34 | -0.57 | -0.12 | -0.35 | -0.13 | -0.17 | -0.86 | -0.13 | -0.08 |
| Q9NXN4 | Ganglioside-induced differentiation-associated protein 2                 | GDAIP2    | -0.55 | 0.58 | -0.22 | 0.98  | -1.16 | 0.74  | 0.40  | 0.45  | -1.51 | -1.34 | 0.46  | 1.20  |
| Q13356 | RING-type E3 ubiquitin-protein ligase PPI2                               | PPI2      | -0.55 | 1.14 | -1.63 | 0.42  | 1.05  | 0.12  | 1.32  | 1.15  | -0.80 | -1.06 | -0.09 | -0.47 |
| Q9NSE4 | Isoleucine-tRNA ligase, mitochondrial                                    | IARS2     | -0.55 | 0.71 | -1.68 | 0.43  | 1.82  | 0.38  | -0.07 | -1.43 | -0.36 | 0.08  | 0.33  | 0.50  |
| P16104 | Histone H2AX                                                             | H2AFX     | -0.55 | 0.92 | 1.03  | -1.81 | 1.95  | -0.18 | 0.12  | 0.30  | -0.34 | -0.63 | -0.47 | 0.04  |
| Q9BTV5 | Fibronectin type III and SPRY domain-containing protein 1                | FSD1      | -0.55 | 1.16 | -0.38 | 1.69  | 0.29  | -0.06 | -0.24 | 0.22  | 0.48  | -2.33 | 0.42  | -0.09 |
| Q8N1A0 | Keratin-like protein KRT222                                              | KRT222    | -0.55 | 0.95 | 1.60  | -0.50 | -0.77 | -0.53 | 1.30  | -0.50 | -0.44 | -0.88 | -0.68 | 1.40  |
| P35568 | Insulin receptor substrate 1                                             | IRS1      | -0.56 | 1.71 | 0.12  | 2.70  | -0.53 | -0.10 | -0.40 | -0.26 | -0.34 | -1.02 | -0.06 | -0.10 |
| Q9NEB9 | Phosphatidylinositol 3-kinase catalytic subunit type 3                   | PIK3C3    | -0.56 | 0.53 | 0.11  | 0.47  | -1.47 | 0.48  | 1.09  | 0.30  | 0.40  | -2.16 | 0.36  | 0.42  |
| Q9BZK7 | F-box-like/WD repeat-containing protein TBL1XR1                          | TBL1XR1   | -0.56 | 0.79 | 1.78  | -1.25 | -0.05 | 0.91  | -0.43 | 0.72  | -0.26 | -1.25 | 0.67  | -0.83 |
| Q96P48 | Arf-GAP with Rho-GAP domain, ANK repeat and PH domain-containing protein | ARAP1     | -0.56 | 0.64 | 0.32  | 0.49  | -0.22 | 0.33  | -0.11 | 0.79  | 0.13  | -2.71 | 0.53  | 0.44  |
| Q8NB66 | Protein unc-13 homolog C                                                 | UNC13C    | -0.56 | 1.12 | -0.04 | -0.25 | -0.73 | -0.25 | 2.56  | -0.40 | -0.35 | -0.85 | 0.77  | -0.45 |
| P12694 | 2-oxoisovalerate dehydrogenase subunit alpha, mitochondrial              | BCKDHA    | -0.56 | 1.39 | -0.41 | -0.60 | 1.36  | 0.35  | 0.77  | -1.97 | -1.00 | 0.10  | 0.52  | 0.87  |
| O60508 | Pre-mRNA-processing factor 17                                            | CDC40     | -0.56 | 0.68 | 0.94  | -0.95 | -1.04 | 0.71  | 1.18  | 0.49  | -0.46 | -1.21 | 1.24  | -0.89 |
| O43678 | NADH dehydrogenase [ubiquinone] 1 alpha subcomplex subunit 2             | NDUFA2    | -0.56 | 1.07 | 1.62  | 1.29  | -0.83 | -0.37 | -0.49 | -0.56 | -0.43 | -0.97 | -0.62 | 1.36  |
| Q9NU22 | Midasin                                                                  | MDN1      | -0.56 | 0.82 | 0.88  | 0.20  | 1.39  | -0.61 | -0.87 | -0.69 | 1.36  | -1.64 | -0.23 | 0.21  |
| Q14775 | Guanine nucleotide-binding protein subunit beta-5                        | GNB5      | -0.56 | 2.28 | 0.03  | 1.41  | -0.26 | 0.79  | 0.14  | -0.09 | 0.15  | -2.48 | 0.32  | -0.02 |
| Q6CQQ9 | OTU domain-containing protein 7B                                         | OTUD7B    | -0.56 | 1.27 | -0.99 | 0.54  | 1.44  | 1.11  | -0.72 | -0.96 | -1.21 | -0.33 | 1.18  | -0.06 |
| P52630 | Signal transducer and activator of transcription 2                       | STAT2     | -0.56 | 0.63 | 1.14  | 0.23  | -1.71 | 0.87  | 0.25  | 0.46  | -0.18 | -1.83 | 0.34  | 0.42  |
| Q9UHV5 | Rap guanine nucleotide exchange factor-like 1                            | RAPGEFL1  | -0.56 | 1.70 | 2.75  | -0.07 | -0.63 | -0.02 | -0.24 | -0.12 | -0.29 | -0.86 | -0.26 | -0.27 |
| Q13017 | Rho GTPase-activating protein 5                                          | ARHGAP5   | -0.56 | 1.20 | -0.33 | 1.35  | -0.87 | 0.96  | 0.21  | -0.27 | -1.68 | -1.04 | 0.92  | 0.74  |
| Q96RS6 | NudC domain-containing protein 1                                         | NUDCD1    | -0.56 | 0.64 | 0.27  | -0.17 | -1.28 | 1.37  | 0.61  | -0.52 | 0.71  | -0.30 | 1.05  | -1.74 |



|        |                                                                          |          |       |      |       |       |       |       |       |       |       |       |       |       |
|--------|--------------------------------------------------------------------------|----------|-------|------|-------|-------|-------|-------|-------|-------|-------|-------|-------|-------|
| Q00178 | GTP-binding protein 1                                                    | GTBPB1   | -0.56 | 0.53 | -1.19 | -0.04 | 0.66  | 0.38  | 0.88  | -1.04 | -1.77 | 1.23  | 0.64  | 0.26  |
| Q9B977 | Polymerase delta-interacting protein 3                                   | POLDIP3  | -0.56 | 1.01 | -0.77 | 0.30  | 0.26  | 0.79  | 0.60  | -1.01 | 0.13  | -2.13 | 0.98  | 0.85  |
| P62891 | 60S ribosomal protein L39                                                | RPL39    | -0.56 | 0.63 | -0.29 | -1.69 | 0.88  | 0.11  | 1.79  | -1.24 | 0.45  | 0.02  | 0.39  | -0.42 |
| Q96L91 | E1A-binding protein p400                                                 | EP400    | -0.56 | 0.48 | -1.15 | 0.65  | 0.26  | 0.68  | 0.19  | -1.97 | -0.99 | 0.98  | 0.64  | 0.71  |
| P41219 | Peripherin                                                               | PRPH     | -0.56 | 1.29 | 0.62  | 0.36  | 1.65  | -0.27 | -0.97 | -0.23 | 0.75  | -1.98 | -0.29 | 0.35  |
| Q6KC79 | Nipped-B-like protein                                                    | NIPBL    | -0.56 | 0.75 | 1.01  | 0.46  | -0.53 | -0.09 | 0.09  | -2.37 | 1.36  | 0.03  | 0.11  | -0.06 |
| Q6P3W7 | SCY1-like protein 2                                                      | SCYL2    | -0.56 | 0.85 | -0.65 | -0.28 | -0.10 | 1.07  | 0.97  | -0.58 | -1.48 | -1.11 | 0.69  | 1.47  |
| P22415 | Upstream stimulatory factor 1                                            | USF1     | -0.56 | 0.77 | 2.57  | -0.40 | -1.52 | -0.29 | -0.41 | 0.86  | -0.39 | -0.78 | -0.40 | -0.23 |
| Q9UHG2 | ProSAA5                                                                  | PCSK1N   | -0.57 | 0.67 | 0.43  | 0.31  | -1.02 | -0.60 | 1.72  | -0.61 | -1.12 | -0.01 | 1.53  | -0.63 |
| P11169 | Solute carrier family 2, facilitated glucose transporter member 3        | SLC2A3   | -0.57 | 0.79 | -0.23 | 2.05  | -0.08 | 0.08  | -0.87 | -0.74 | -0.46 | -1.29 | 1.18  | 0.37  |
| Q9Y2W3 | Proton-associated sugar transporter A                                    | SLC45A1  | -0.57 | 0.90 | -0.30 | 2.13  | -0.84 | 0.64  | -0.57 | -0.60 | -0.54 | -1.07 | 1.08  | 0.06  |
| Q6F5E8 | Capping protein, Arp2/3 and myosin I linker protein 2                    | CARMIL2  | -0.57 | 0.86 | 1.27  | 1.45  | 0.41  | -1.74 | -0.35 | -0.54 | 0.48  | -0.54 | -0.95 | 0.51  |
| Q99250 | Sodium channel protein type 2 subunit alpha                              | SCN2A    | -0.57 | 0.94 | 0.66  | 1.42  | -0.20 | -0.11 | -0.67 | 1.32  | 0.64  | -1.72 | -0.52 | -0.81 |
| Q9UM22 | Synergism gamma                                                          | SYNRG    | -0.57 | 0.66 | -1.07 | 1.14  | -0.47 | 0.37  | 0.85  | -0.44 | 0.26  | -1.96 | 0.15  | 1.16  |
| O60260 | E3 ubiquitin-protein ligase parkin                                       | PRKN     | -0.57 | 0.82 | 1.80  | -0.13 | -1.54 | 0.54  | 0.31  | 0.39  | -1.17 | 0.17  | 0.64  | -1.01 |
| Q14C28 | Hepatocyte cell adhesion molecule                                        | HEPACAM  | -0.57 | 1.35 | -0.95 | 1.21  | 0.55  | -0.53 | 1.17  | -0.40 | -1.82 | -0.56 | 0.75  | 0.59  |
| P17706 | Tyrosine-protein phosphatase non-receptor type 2                         | PTPN2    | -0.57 | 1.02 | -0.34 | 2.25  | 0.11  | -0.54 | -0.31 | -0.64 | -0.72 | -1.18 | 0.38  | 0.98  |
| Q96LR2 | Leucine rich adaptor protein 1                                           | LURAP1   | -0.57 | 1.16 | -1.08 | 0.20  | 0.54  | 1.64  | -0.01 | -1.16 | -1.42 | 0.88  | -0.34 | 0.75  |
| Q99961 | Endophilin-A2                                                            | SH3GL1   | -0.57 | 0.97 | 2.13  | 0.63  | -0.19 | 0.04  | -0.48 | -0.34 | 0.72  | -1.28 | -0.39 | 0.16  |
| P27449 | V-type proton ATPase 16 kDa proteolipid subunit                          | ATP6V0C  | -0.57 | 0.89 | 0.87  | 1.34  | -0.26 | 0.52  | -1.43 | -1.44 | 1.19  | -0.45 | 0.22  | -0.57 |
| Q8WZ42 | Titin                                                                    | TTN      | -0.57 | 0.51 | -2.00 | 0.75  | 0.24  | 0.70  | 0.97  | -1.32 | -0.66 | 0.11  | 0.64  | 0.58  |
| Q01844 | RNA-binding protein EWS                                                  | EWSR1    | -0.57 | 0.84 | 0.63  | -0.36 | -0.74 | -0.63 | 2.11  | -1.37 | -0.31 | 1.01  | -0.07 | -0.27 |
| Q9NZU7 | Calcium-binding protein 1                                                | CABP1    | -0.57 | 1.43 | 1.20  | -0.60 | -0.11 | -0.46 | 1.48  | 0.07  | -1.88 | -0.41 | 1.00  | -0.28 |
| Q9H6B1 | Zinc finger protein 385D                                                 | ZNF385D  | -0.57 | 1.80 | 0.17  | -0.19 | -0.59 | -0.21 | 2.65  | -0.12 | -0.24 | -1.18 | -0.23 | -0.07 |
| O95391 | Pre-mRNA-splicing factor SLU7                                            | SLU7     | -0.57 | 0.80 | 0.19  | 0.07  | -0.19 | -0.35 | 1.27  | -1.01 | 2.03  | -1.22 | -0.75 | -0.02 |
| Q9H501 | ESF1 homolog                                                             | ESF1     | -0.57 | 1.05 | 1.90  | -0.54 | -0.83 | -0.33 | 1.00  | -0.53 | 1.29  | -0.88 | -0.59 | -0.49 |
| Q06413 | Myocyte-specific enhancer factor 2C                                      | MEF2C    | -0.57 | 0.65 | -0.92 | 0.63  | -1.24 | 0.96  | 1.39  | -1.07 | -1.03 | -0.20 | 0.81  | 0.68  |
| Q9Y5K8 | V-type proton ATPase subunit D                                           | ATP6V1D  | -0.57 | 1.83 | -0.23 | 0.33  | 0.42  | 0.77  | 0.58  | -1.30 | -1.55 | 1.14  | 1.00  | -1.16 |
| Q99719 | Septin-5                                                                 | SEPTIN5  | -0.57 | 1.26 | 0.62  | 0.89  | -1.26 | 0.69  | 0.44  | -0.29 | 1.21  | -1.96 | 0.10  | -0.44 |
| Q969F9 | Hermansky-Pudlak syndrome 3 protein                                      | HPS3     | -0.57 | 1.57 | 2.75  | -0.26 | -0.63 | -0.09 | -0.09 | -0.16 | -0.09 | -0.90 | -0.31 | -0.22 |
| Q05209 | Tyrosine-protein phosphatase non-receptor type 12                        | PTPN12   | -0.57 | 0.62 | -0.70 | 1.23  | -1.10 | 0.46  | 0.89  | -0.86 | 1.09  | -1.14 | 0.95  | -0.83 |
| Q96CW1 | AP-2 complex subunit mu                                                  | AP2M1    | -0.57 | 4.28 | 1.10  | 1.22  | -0.66 | 0.78  | 0.55  | -2.09 | -0.52 | -0.09 | 0.24  | -0.53 |
| Q8N608 | Inactive dipeptidyl peptidase 10                                         | DPP10    | -0.57 | 0.77 | 0.24  | 1.39  | 1.13  | -1.54 | -0.27 | 0.07  | -0.76 | 0.66  | 0.50  | -1.42 |
| P56962 | Syntaxin-17                                                              | STX17    | -0.58 | 0.83 | 0.65  | 2.48  | -0.78 | -0.64 | -0.69 | -0.47 | -0.58 | 0.29  | 0.22  | -0.48 |
| P45954 | Short/branched chain specific acyl-CoA dehydrogenase, mitochondrial      | ACAD5B   | -0.58 | 0.72 | -0.93 | -0.82 | 1.78  | 0.39  | 0.47  | -1.20 | -1.11 | 1.02  | 0.43  | -0.02 |
| P53618 | Coatomer subunit beta                                                    | COPB1    | -0.58 | 0.67 | -0.89 | 0.41  | 0.61  | 0.72  | -0.01 | -1.54 | -1.65 | 1.13  | 0.66  | 0.57  |
| O94811 | Tubulin polymerization-promoting protein                                 | TPPP     | -0.58 | 2.45 | 0.22  | 1.08  | -0.09 | 0.67  | 0.39  | -2.14 | -0.03 | -0.64 | 1.28  | -0.74 |
| Q92686 | Neurogranin                                                              | NRGN     | -0.58 | 1.21 | -0.38 | -0.35 | -1.15 | -0.44 | 2.69  | -0.70 | -0.54 | -0.01 | -0.55 | 0.43  |
| Q9UPP2 | IQ motif and SEC7 domain-containing protein 3                            | IQSEC3   | -0.58 | 0.58 | 0.90  | -0.13 | 1.24  | 0.56  | -1.84 | 0.67  | 0.04  | -1.38 | 0.48  | -0.55 |
| Q9UNA1 | Rho GTPase-activating protein 26                                         | ARHGAP26 | -0.58 | 0.48 | 0.60  | 0.65  | -0.78 | 0.35  | -0.20 | 0.97  | 0.24  | -2.49 | 0.37  | 0.28  |
| O00303 | Eukaryotic translation initiation factor 3 subunit F                     | EIF3F    | -0.58 | 0.63 | 0.83  | 0.55  | 0.06  | 0.54  | -1.18 | 0.87  | -0.61 | -2.15 | 0.53  | 0.57  |
| Q6PKG0 | La-related protein 1                                                     | LARP1    | -0.58 | 1.36 | -0.09 | 0.77  | -0.23 | 1.29  | -0.26 | -2.04 | -0.96 | -0.08 | 1.14  | 0.47  |
| P32519 | ETS-related transcription factor E1F-1                                   | ELF1     | -0.58 | 1.03 | 1.65  | -0.59 | -0.95 | 0.31  | 0.76  | -0.61 | -0.64 | -0.96 | 1.54  | -0.50 |
| O43157 | Plexin-B1                                                                | PLXNB1   | -0.58 | 0.50 | -0.90 | 0.21  | 0.70  | 0.58  | 0.07  | -2.43 | -0.18 | 0.84  | 0.74  | 0.38  |
| Q8NAB2 | Kelch repeat and BTB domain-containing protein 3                         | KBTBD3   | -0.58 | 0.71 | -0.48 | 1.14  | -0.77 | 1.53  | -0.55 | -0.54 | -0.89 | -1.61 | -0.49 | -0.49 |
| P24752 | Acetyl-CoA acetyltransferase, mitochondrial                              | ACAT1    | -0.58 | 0.74 | -1.09 | 0.99  | 0.58  | 1.26  | -0.84 | -0.91 | -1.43 | 0.08  | 1.14  | 0.22  |
| Q07912 | Activated CDC42 kinase 1                                                 | TNK2     | -0.58 | 0.66 | 0.56  | 0.64  | -1.58 | 0.35  | 0.84  | 1.37  | -1.43 | -0.89 | 0.43  | -0.30 |
| O75746 | Calcium-binding mitochondrial carrier protein Aralar1                    | SLC25A12 | -0.58 | 1.72 | 1.37  | -1.04 | -0.39 | 0.40  | 1.38  | -0.87 | -1.64 | 0.16  | 0.03  | 0.60  |
| Q14161 | ARF GTPase-activating protein GIT2                                       | GIT2     | -0.58 | 1.96 | -0.51 | 1.79  | 0.63  | 0.24  | -0.27 | -0.82 | -1.91 | -0.28 | 0.55  | 0.57  |
| Q6ZMW3 | Echinoderm microtubule-associated protein-like 6                         | EBL6     | -0.58 | 1.72 | -0.14 | -0.14 | 0.32  | 0.30  | 1.41  | -1.97 | -1.10 | 1.28  | 0.19  | -0.15 |
| P35609 | Alpha-actinin-2                                                          | ACTN2    | -0.58 | 1.24 | -0.46 | 1.74  | 0.23  | -0.20 | 0.05  | -0.31 | 1.09  | -2.08 | -0.19 | 0.13  |
| P78527 | DNA-dependent protein kinase catalytic subunit                           | PRKDC    | -0.58 | 2.37 | -0.65 | 1.41  | 0.14  | 0.89  | 0.35  | -2.01 | -0.87 | -0.35 | 0.29  | 0.80  |
| Q5GLZ8 | Probable E3 ubiquitin-protein ligase HERC4                               | HERC4    | -0.58 | 0.74 | 0.99  | 0.88  | -0.34 | 0.35  | -0.98 | 1.15  | -1.22 | -1.68 | 0.53  | 0.32  |
| B7ZBB8 | Protein phosphatase 1 regulatory subunit 3G                              | PPP1R3G  | -0.58 | 1.19 | -0.34 | -0.73 | 1.91  | 1.24  | -0.74 | -0.70 | -0.66 | -1.02 | 0.27  | 0.78  |
| Q9BR61 | Acyl-CoA-binding domain-containing protein 6                             | ACBD6    | -0.58 | 0.76 | -0.32 | 1.24  | -1.49 | 1.02  | 0.47  | -0.05 | 0.52  | -1.69 | 0.75  | -0.45 |
| Q7Z2K8 | G protein-regulated inducer of neurite outgrowth 1                       | GPRIN1   | -0.58 | 1.67 | -0.56 | 1.53  | 0.64  | 0.71  | -0.63 | -2.18 | 0.10  | -0.23 | 0.42  | 0.21  |
| O75525 | KH domain-containing, RNA-binding, signal transduction-associate KHDRBS3 | KHDRBS3  | -0.59 | 1.34 | 0.04  | 1.85  | -1.00 | 0.60  | -0.05 | -1.59 | -0.30 | 1.12  | -0.09 | -0.58 |
| Q9UB55 | Gamma-aminobutyric acid type B receptor subunit 1                        | GABBR1   | -0.59 | 0.42 | 1.76  | 0.27  | -0.55 | 0.02  | -0.94 | 1.51  | 0.22  | -1.38 | -0.51 | -0.40 |
| Q53HC0 | Coiled-coil domain-containing protein 92                                 | CCDC92   | -0.59 | 2.20 | 0.37  | -0.62 | 1.22  | 1.02  | 0.06  | -1.22 | -1.37 | 0.48  | 1.11  | -1.05 |
| Q86T24 | Transcriptional regulator Kaiso                                          | ZBTB33   | -0.59 | 2.97 | 0.44  | 0.13  | -0.20 | 1.29  | 0.85  | -0.52 | 0.21  | -0.66 | -2.26 | 0.71  |
| Q01831 | DNA repair protein complementing XP-C cells                              | XPC      | -0.59 | 0.54 | 1.46  | 0.78  | -0.40 | 0.02  | -1.16 | 1.06  | 0.69  | -1.35 | 0.04  | -1.14 |
| Q9H993 | Damage-control phosphatase ARMT1                                         | ARMT1    | -0.59 | 0.64 | 0.08  | 0.46  | -0.86 | 0.82  | 0.31  | 0.37  | -0.19 | -2.45 | 0.66  | 0.80  |
| Q06787 | Synaptic functional regulator FMR1                                       | FMR1     | -0.59 | 1.67 | 1.43  | -0.15 | -0.38 | 1.18  | -0.40 | -0.19 | 0.24  | -2.11 | 0.75  | -0.38 |
| Q9H254 | Spectrin beta chain, non-erythrocytic 4                                  | SPTBN4   | -0.59 | 2.25 | -0.36 | 1.90  | -0.55 | 0.59  | 0.48  | -1.92 | -0.27 | -0.29 | 0.67  | -0.25 |
| P48426 | Phosphatidylinositol 5-phosphate 4-kinase type-2 alpha                   | PIP4K2A  | -0.59 | 1.47 | 1.04  | 0.72  | 1.13  | -0.94 | -0.41 | 0.16  | -1.52 | 1.24  | -1.02 | -0.40 |
| Q5TDH0 | Protein DD11 homolog 2                                                   | DDI2     | -0.59 | 1.17 | 1.06  | 1.44  | -0.48 | -0.31 | -0.40 | 0.57  | -0.29 | -2.18 | 0.25  | 0.34  |
| Q8N684 | Cleavage and polyadenylation specificity factor subunit 7                | CPSF7    | -0.59 | 1.92 | 0.39  | -0.44 | -0.68 | 1.25  | 1.34  | -0.33 | -0.23 | -1.52 | 1.19  | -0.98 |
| Q96Q04 | Serine/threonine-protein kinase LMTK3                                    | LMTK3    | -0.59 | 0.89 | 0.95  | -0.24 | -1.78 | 0.11  | 2.04  | -0.69 | 0.10  | -0.24 | 0.09  | -0.35 |
| Q5T440 | Putative transferase CAF17, mitochondrial                                | IBA57    | -0.59 | 0.74 | -0.98 | 0.99  | 2.24  | -0.70 | -0.63 | -0.59 | -0.62 | 0.40  | -0.42 | 0.31  |
| P07357 | Complement component C8 alpha chain                                      | C8A      | -0.59 | 0.54 | -0.66 | -0.78 | 1.83  | 1.13  | -0.83 | -0.77 | -0.68 | 0.39  | 1.01  | -0.66 |
| Q15818 | Neuronal pentraxin-1                                                     | NPTX1    | -0.59 | 0.52 | -0.44 | 1.45  | -1.35 | 0.90  | 0.11  | -1.70 | 0.09  | -0.46 | 0.74  | 0.66  |
| Q5TAQ9 | DDB1- and CUL4-associated factor 8                                       | DCAF8    | -0.59 | 0.98 | 0.62  | -1.25 | 0.22  | 1.75  | -0.20 | -0.46 | -0.12 | -1.64 | 0.99  | 0.10  |
| P88559 | Pyruvate dehydrogenase E1 component subunit alpha, somatic for PDHA1     | PDHA1    | -0.59 | 1.45 | -0.12 | -0.83 | -0.51 | 1.46  | 1.52  | -0.03 | -0.18 | -0.59 | 0.85  | -1.58 |
| P63000 | Ras-related C3 botulinum toxin substrate 1                               | RAC1     | -0.59 | 3.03 | -0.38 | 1.41  | 0.42  | 0.82  | 0.25  | -1.93 | -0.54 | 0.45  | 0.65  | -1.15 |
| Q70EL4 | Ubiquitin carboxyl-terminal hydrolase 43                                 | USP43    | -0.59 | 1.62 | 0.00  | -0.13 | -0.56 | 2.74  | -0.32 | -0.34 | -0.32 | -0.90 | -0.17 | 0.00  |
| Q5VTL8 | Pre-mRNA-splicing factor 38B                                             | PRPF38B  | -0.59 | 0.80 | 0.50  | -1.64 | 0.54  | 0.06  | 1.50  | 0.36  | -1.64 | -0.53 | 0.29  | 0.56  |
| Q9NS86 | LanC-like protein 2                                                      | LANCL2   | -0.60 | 1.38 | 0.90  | 0.11  | 0.57  | 0.71  | -0.80 | -1.08 | -1.76 | 1.16  | 0.82  | -0.63 |
| Q8IVD9 | NudC domain-containing protein 3                                         | NUDCD3   | -0.60 | 0.92 | 1.76  | -0.35 | 0.54  | 0.28  | -1.15 | 0.28  | 0.63  | -1.88 | 0.16  | -0.27 |
| Q9BX66 | Sorbin and SH3 domain-containing protein 1                               | SORBS1   | -0.60 | 1.31 | -0.22 | 0.46  | 0.39  | 0.75  | 0.09  | 0.61  | -2.56 | -0.66 | 0.60  | 0.53  |
| Q9HB19 | Pleckstrin homology domain-containing family A member 2                  | PLEKHA2  | -0.60 | 0.87 | 0.28  | 1.01  | -0.38 | 0.76  | -0.63 | -0.09 | -2.23 | -0.47 | 0.70  | 1.05  |
| Q92688 | Acidic leucine-rich nuclear phosphoprotein 32 family member B            | ANP32B   | -0.60 | 1.22 | -0.10 | -0.69 | 2.01  | 0.98  | -0.85 | -0.62 | -0.58 | 1.12  | -0.60 | -0.67 |
| P04275 | von Willebrand factor                                                    | VWF      | -0.60 | 0.79 | -0.85 | -0.56 | 1.23  | 0.44  | 0.69  | -1.29 | -1.65 | 0.79  | 0.73  | 0.47  |
| P62753 | 40S ribosomal protein S6                                                 | RPS6     | -0.60 | 0.70 | -0.14 | -1.55 | 0.17  | 0.12  | 2.27  | -0.30 | -1.10 | 0.25  | 0.15  | 0.11  |

|          |                                                                        |           |       |      |       |       |       |       |       |       |       |       |       |       |
|----------|------------------------------------------------------------------------|-----------|-------|------|-------|-------|-------|-------|-------|-------|-------|-------|-------|-------|
| Q6R327   | Rapamycin-insensitive companion of mTOR                                | RICTOR    | -0.60 | 1.43 | 0.51  | 0.72  | -0.55 | 0.54  | 0.33  | -1.06 | -2.04 | -0.27 | 0.41  | 1.41  |
| P62195   | 26S proteasome regulatory subunit 8                                    | PSMC5     | -0.60 | 2.22 | 0.86  | 0.90  | -0.68 | 0.48  | 0.53  | 0.57  | -0.86 | -2.30 | 0.37  | 0.14  |
| P30085   | UMP-CMP kinase                                                         | CMK1      | -0.60 | 1.20 | -1.65 | 1.01  | 0.47  | 0.96  | 0.53  | -1.07 | -1.15 | -0.55 | 0.81  | 0.63  |
| Q99490   | Arf-GAP with GTPase, ANK repeat and PH domain-containing prot          | AGAP2     | -0.60 | 0.66 | -1.14 | 0.95  | 0.70  | 0.58  | -0.27 | -1.94 | -0.88 | 0.77  | 0.52  | 0.72  |
| O43301   | Heat shock 70 kDa protein 12A                                          | HSPA12A   | -0.60 | 1.70 | 1.16  | 0.42  | -1.30 | 0.94  | 0.47  | -0.34 | 0.21  | -1.97 | 0.72  | -0.33 |
| P20916   | Myelin-associated glycoprotein                                         | MAG       | -0.60 | 0.64 | -0.94 | 0.32  | 1.49  | 0.40  | -0.47 | -1.70 | -0.53 | 1.30  | 0.58  | -0.46 |
| O75363   | Breast carcinoma-amplified sequence 1                                  | BCAS1     | -0.61 | 1.02 | 0.88  | -0.76 | 2.24  | 0.12  | -1.27 | -0.09 | 0.02  | -0.30 | 0.11  | -0.95 |
| Q5TCY1   | Tau-tubulin kinase 1                                                   | TTBK1     | -0.61 | 0.51 | 0.53  | 0.60  | -0.85 | 0.19  | 0.21  | 0.17  | 1.86  | -1.53 | 0.14  | -1.30 |
| Q9BYN0   | Sulfiredoxin-1                                                         | SRXN1     | -0.61 | 0.66 | 0.43  | 0.79  | -1.05 | -0.21 | 0.87  | 1.44  | -0.96 | -1.22 | -0.99 | 0.89  |
| O95714   | E3 ubiquitin-protein ligase HERC2                                      | HERC2     | -0.61 | 0.77 | -1.21 | 0.47  | 0.94  | 0.61  | 0.13  | -1.50 | -1.50 | 0.86  | 0.80  | 0.40  |
| Q6GMV3   | Putative peptidyl-tRNA hydrolase PTRHD1                                | PTRHD1    | -0.61 | 0.54 | -0.60 | 1.53  | -0.63 | -0.74 | 1.13  | -0.66 | 0.16  | -0.95 | -0.72 | 1.49  |
| O95267   | RAS guanyl-releasing protein 1                                         | RASGRP1   | -0.61 | 0.69 | 1.74  | -0.59 | -0.74 | 1.21  | -0.77 | 0.34  | -0.61 | -0.95 | 1.06  | -0.70 |
| Q9Y4D2   | Sn1-specific diacylglycerol lipase alpha                               | DAGLA     | -0.61 | 0.74 | 1.50  | 0.57  | -1.88 | 0.95  | -0.22 | 0.06  | -0.37 | -0.96 | 0.82  | -0.47 |
| Q6PL24   | Protein TMED8                                                          | TMED8     | -0.61 | 1.34 | 0.56  | 1.39  | -1.04 | 0.75  | -0.22 | 0.44  | -0.67 | -1.97 | 0.74  | 0.03  |
| P42331   | Rho GTPase-activating protein 25                                       | ARHGAP25  | -0.61 | 0.92 | -0.48 | 0.84  | -0.78 | 0.70  | 0.81  | -1.18 | -1.23 | -0.77 | 0.49  | 1.61  |
| O60488   | Long-chain-fatty-acid-CoA ligase 4                                     | ACSL4     | -0.61 | 0.91 | -0.45 | 0.06  | 0.37  | -0.63 | 1.71  | 0.26  | -1.80 | 1.28  | -0.58 | -0.24 |
| O60760   | Hematopoietic prostaglandin D synthase                                 | HPGDS     | -0.61 | 0.97 | -0.44 | -0.48 | -0.76 | 0.93  | 1.88  | -0.56 | -0.44 | -0.96 | 1.37  | -0.54 |
| P42684   | Tyrosine-protein kinase ABL2                                           | ABL2      | -0.61 | 0.65 | 0.65  | 0.96  | -0.92 | 0.25  | -0.12 | 0.57  | 0.89  | -2.34 | 0.28  | -0.22 |
| Q01813   | ATP-dependent 6-phosphofructokinase, platelet type                     | PFKP      | -0.61 | 2.08 | -0.21 | 0.93  | 1.63  | 0.16  | -0.56 | -1.03 | -0.53 | -1.65 | 0.27  | 0.98  |
| O43295   | SLIT-ROBO Rho GTPase-activating protein 3                              | SRGAP3    | -0.61 | 2.04 | 0.21  | 1.00  | 1.00  | 1.15  | -1.42 | -0.98 | 0.78  | -0.36 | 0.01  | -1.38 |
| P02656   | Apolipoprotein C-III                                                   | APOC3     | -0.61 | 1.07 | -0.29 | 1.15  | -0.76 | -0.47 | 1.57  | -0.45 | -0.59 | -1.09 | -0.59 | 1.50  |
| Q6PGP7   | Tetratricopeptide repeat protein 37                                    | TTC37     | -0.61 | 2.12 | 0.81  | -0.74 | 2.29  | -0.37 | 0.04  | -1.18 | 0.56  | -0.67 | -0.34 | -0.40 |
| P39023   | 60S ribosomal protein L3                                               | RPL3      | -0.61 | 0.94 | -0.68 | -1.20 | 1.03  | 0.30  | 1.65  | -0.73 | -1.45 | 0.61  | 0.44  | 0.03  |
| P25705   | ATP synthase subunit alpha, mitochondrial                              | ATP5F1A   | -0.61 | 2.27 | -0.03 | -0.24 | 2.65  | 0.11  | -0.34 | -0.88 | -0.34 | -0.84 | 0.24  | -0.33 |
| Q05193   | Dynamin-1                                                              | DNM1      | -0.61 | 1.44 | -0.20 | 1.66  | -0.22 | 0.64  | -0.36 | -1.10 | 0.98  | -1.75 | 0.58  | -0.23 |
| Q5TFE4   | 5'-nucleotidase domain-containing protein 1                            | NTSDC1    | -0.61 | 1.02 | -0.01 | 1.70  | 0.53  | 0.18  | -1.23 | -1.96 | -0.24 | 0.39  | 0.20  | 0.45  |
| Q9P035   | Very-long-chain (3R)-3-hydroxyacyl-CoA dehydratase 3                   | HACD3     | -0.62 | 0.69 | -1.66 | 0.41  | -0.02 | 1.24  | 0.88  | -0.92 | -1.14 | -0.42 | 1.02  | 0.61  |
| Q8NB46   | Serine/threonine-protein phosphatase 6 regulatory ankyrin repeat       | ANKRD52   | -0.62 | 0.52 | -0.54 | -0.74 | -0.88 | 1.09  | 1.75  | -0.68 | -0.70 | -0.91 | 1.01  | 0.59  |
| Q8NH75   | RNA polymerase II-associated factor 1 homolog                          | PAF1      | -0.62 | 0.76 | 0.55  | -1.01 | -1.05 | 0.81  | 1.62  | 0.17  | -0.92 | -1.31 | 0.72  | 0.41  |
| Q9BQ15   | SH3-containing GRB2-like protein 3-interacting protein 1               | SGIP1     | -0.62 | 1.40 | 0.68  | 1.38  | 0.28  | -0.14 | -0.70 | -1.99 | 1.31  | -0.01 | -0.50 | -0.30 |
| Q9NPB6   | Partitioning defective 6 homolog alpha                                 | PARD6A    | -0.62 | 1.26 | 1.52  | 0.39  | 1.47  | -0.96 | -1.02 | 0.59  | -0.84 | -0.58 | -0.93 | 0.37  |
| Q9Y639   | Neuroplastin                                                           | NPTN      | -0.62 | 0.81 | 1.20  | 1.45  | -1.37 | -0.09 | -0.22 | 0.13  | -1.15 | -1.12 | 0.24  | 0.94  |
| P05026   | Sodium/potassium-transporting ATPase subunit beta-1                    | ATP1B1    | -0.62 | 2.11 | 1.60  | 0.94  | 0.78  | 0.18  | -1.49 | -1.22 | 0.02  | 0.29  | -0.04 | -1.06 |
| Q9P2F8   | Signal-induced proliferation-associated 1-like protein 2               | SIPA1L2   | -0.62 | 2.76 | 1.45  | 0.49  | -0.97 | -1.22 | 1.62  | -0.44 | -0.35 | -1.48 | 0.47  | -0.57 |
| O14559   | Rho GTPase-activating protein 33                                       | ARHGAP33  | -0.62 | 0.64 | -0.71 | 0.96  | -1.05 | 0.03  | 0.57  | -0.88 | -0.88 | -1.15 | 1.02  | 1.08  |
| P13200   | 26S proteasome non-ATPase regulatory subunit 2                         | PSMD2     | -0.62 | 0.79 | -0.39 | 0.28  | 0.11  | 0.48  | 0.51  | -0.17 | -2.65 | 0.49  | 0.51  | 0.84  |
| P42679   | Megakaryocyte-associated tyrosine-protein kinase                       | MATK      | -0.62 | 0.63 | 0.97  | 0.59  | -0.85 | 0.81  | -0.73 | -0.63 | -0.64 | 1.97  | -0.73 | -0.76 |
| Q5VY58   | Terminal uridylyltransferase 7                                         | TUT7      | -0.62 | 0.89 | 0.84  | -0.66 | -0.89 | 0.68  | 1.08  | -0.62 | -0.67 | -0.96 | -0.62 | 1.82  |
| GABORA12 | Gamma-aminobutyric acid receptor-associated protein-like 2             | GABARAPL2 | -0.62 | 2.48 | 0.61  | 1.62  | -0.52 | -0.05 | 0.54  | -1.60 | 1.20  | -0.41 | -0.31 | -1.08 |
| Q9NQK7   | Coiled-coil domain-containing protein 177                              | CCDC177   | -0.62 | 0.74 | 0.62  | 1.29  | -1.13 | 0.21  | -0.09 | 0.95  | 0.30  | -2.15 | -0.12 | 0.12  |
| Q9Y6V0   | Protein piccolo                                                        | PCLO      | -0.62 | 1.06 | 1.19  | 1.15  | -0.05 | -0.73 | -0.34 | 0.05  | 1.21  | -1.92 | -0.66 | 0.12  |
| Q6NT76   | Homeobox-containing protein 1                                          | HMBX01    | -0.62 | 1.75 | 0.00  | -0.24 | -0.49 | -0.17 | 2.71  | -0.15 | -0.17 | -1.05 | -0.39 | -0.06 |
| Q92890   | Ubiquitin recognition factor in ER-associated degradation protein      | UFD1      | -0.62 | 2.10 | 0.91  | 1.43  | 0.09  | -0.14 | -0.31 | -2.15 | -0.67 | 0.97  | -0.13 | -0.01 |
| Q9BQ69   | ADP-ribose glycohydrolase MACROD1                                      | MACROD1   | -0.62 | 0.82 | -0.67 | -0.11 | 1.61  | 0.95  | -0.80 | -0.82 | -0.72 | -1.23 | 1.10  | 0.69  |
| B68371   | Tubulin beta-4B chain                                                  | TUBB4B    | -0.62 | 2.67 | 0.83  | 1.96  | -0.79 | 0.52  | -0.23 | -0.45 | 0.17  | -1.78 | 0.08  | -0.32 |
| Q9NR46   | Endophilin-B2                                                          | SH3GLB2   | -0.62 | 0.85 | -0.03 | 0.87  | -0.16 | -0.07 | 0.43  | -0.70 | 1.40  | -2.32 | 0.15  | 0.43  |
| Q99460   | 26S proteasome non-ATPase regulatory subunit 1                         | PSMD1     | -0.62 | 1.51 | -0.05 | 1.37  | 0.96  | 0.75  | -1.46 | -0.57 | -1.54 | -0.47 | 0.66  | 0.35  |
| P50851   | Lipopolysaccharide-responsive and beige-like anchor protein            | LRBA      | -0.63 | 0.71 | 1.96  | -0.55 | -0.37 | 0.53  | -0.70 | -1.12 | 0.26  | -0.73 | -0.60 | 1.32  |
| Q13423   | NAD(P) transhydrogenase, mitochondrial                                 | NNT       | -0.63 | 0.63 | -1.99 | 1.08  | 0.50  | 0.71  | 0.48  | -0.02 | -1.52 | -0.26 | 0.62  | 0.39  |
| P41240   | Tyrosine-protein kinase CSK                                            | CSK       | -0.63 | 0.56 | -2.01 | 1.46  | 1.27  | 0.43  | -0.42 | -0.40 | -0.16 | -0.70 | 0.39  | 0.13  |
| Q13505   | Metaxin-1                                                              | MTX1      | -0.63 | 1.55 | 0.12  | -0.29 | -0.54 | 2.76  | -0.37 | -0.20 | -0.35 | -0.81 | -0.21 | -0.10 |
| O94979   | Protein transport protein Sec31A                                       | SEC31A    | -0.63 | 1.67 | 1.02  | 0.26  | -0.40 | 0.61  | 0.25  | -0.34 | -1.92 | -1.27 | 0.54  | 1.26  |
| Q14693   | Phosphatidate phosphatase LPIN1                                        | LPIN1     | -0.63 | 0.93 | 0.86  | 0.57  | 0.12  | -1.20 | 0.74  | -0.05 | 0.44  | -1.59 | -1.21 | 1.32  |
| P01266   | Thyroglobulin                                                          | TG        | -0.63 | 1.35 | 2.79  | -0.29 | -0.49 | -0.11 | -0.39 | -0.28 | -0.12 | -0.73 | -0.22 | -0.16 |
| P57737   | Coronin-7                                                              | CORO7     | -0.63 | 1.33 | 1.34  | -0.43 | -1.08 | 1.02  | 0.58  | -0.18 | -0.98 | -1.59 | 0.86  | 0.46  |
| Q86XD5   | Protein FAM131B                                                        | FAM131B   | -0.63 | 1.93 | 0.38  | 1.60  | -0.02 | 0.08  | -0.15 | -1.59 | 0.88  | 0.73  | -0.41 | -1.50 |
| P52272   | Heterogeneous nuclear ribonucleoprotein M                              | HNRNPM    | -0.63 | 1.48 | 1.56  | -0.50 | -1.06 | 0.98  | 0.55  | -0.04 | -1.36 | -1.15 | 0.84  | 0.17  |
| P62314   | Small nuclear ribonucleoprotein Sm D1                                  | SNRNP1    | -0.63 | 1.63 | -0.23 | -1.29 | 1.83  | 0.54  | 0.83  | -0.92 | -1.34 | 0.53  | -0.10 | 0.15  |
| Q72631   | N-terminal EF-hand calcium-binding protein 2                           | NECAB2    | -0.63 | 0.95 | 0.83  | 0.47  | -1.43 | 0.67  | 0.56  | 0.17  | 0.81  | -1.43 | 0.75  | -1.40 |
| P10586   | Receptor-type tyrosine-protein phosphatase F                           | PTPRF     | -0.63 | 1.51 | -0.97 | 1.72  | -0.28 | 0.79  | 0.32  | 0.12  | -0.04 | -2.03 | 0.39  | 0.00  |
| Q9HC15   | Melanoma-associated antigen E1                                         | MAGEE1    | -0.63 | 1.59 | 2.77  | -0.13 | -0.44 | -0.13 | -0.37 | -0.32 | -0.18 | -0.85 | -0.33 | -0.02 |
| Q01064   | Calcium/calmodulin-dependent 3',5'-cyclic nucleotide phosphodiesterase | PDE1B     | -0.63 | 0.89 | 1.37  | 0.39  | -0.84 | 0.13  | 0.02  | 0.30  | 0.70  | -2.37 | 0.20  | 0.10  |
| Q9H7N4   | Splicing factor, arginine/serine-rich 19                               | SCAF1     | -0.63 | 0.72 | -0.72 | -0.07 | -0.28 | 0.46  | 1.49  | -1.69 | -1.13 | 1.20  | 0.62  | 0.12  |
| P14598   | Neutrophil cytosol factor 1                                            | NCF1      | -0.63 | 0.74 | -0.78 | 1.71  | -0.06 | 1.05  | -1.02 | 0.26  | -0.05 | -1.16 | 1.00  | -0.94 |
| Q9H0E2   | Toll-interacting protein                                               | TOLLIP    | -0.64 | 5.14 | 0.55  | 1.60  | -0.02 | 0.44  | 0.74  | 0.08  | -1.30 | -1.89 | 0.14  | -0.35 |
| Q6NW34   | Nucleolus and neural progenitor protein                                | NEPRO     | -0.64 | 2.07 | 0.22  | 2.69  | -0.49 | -0.08 | -0.29 | -0.07 | -0.40 | -1.02 | -0.19 | -0.37 |
| Q12955   | Ankyrin-3                                                              | ANK3      | -0.64 | 1.91 | 0.88  | 0.73  | -1.42 | 1.29  | 0.36  | -0.89 | -0.12 | -1.38 | 0.99  | -0.45 |
| P15700   | Disks large homolog 2                                                  | DLG2      | -0.64 | 1.71 | -0.05 | 0.59  | 0.40  | -0.35 | 1.17  | -1.37 | 1.77  | -0.86 | -1.11 | -0.18 |
| P43243   | Matrin-3                                                               | MATR3     | -0.64 | 3.60 | 0.91  | -0.90 | 0.92  | 1.02  | 0.79  | -0.32 | -2.03 | -0.77 | 0.28  | 0.10  |
| Q14155   | Rho guanine nucleotide exchange factor 7                               | ARHGEF7   | -0.64 | 1.01 | 0.17  | 1.15  | -0.57 | 0.50  | -0.08 | -0.23 | 1.48  | -2.11 | 0.23  | -0.55 |
| Q00537   | Cyclin-dependent kinase 17                                             | CDK17     | -0.64 | 1.02 | 0.45  | 1.13  | -1.91 | 0.89  | 0.62  | 0.26  | 0.24  | -1.45 | 0.37  | -0.60 |
| Q9UK76   | Jupiter microtubule associated homolog 1                               | JPT1      | -0.64 | 0.69 | 0.45  | 0.63  | -0.81 | -0.76 | 1.35  | -0.50 | -0.72 | 1.86  | -0.77 | -0.73 |
| Q92879   | CUGBP Elav-like family member 1                                        | CELF1     | -0.64 | 1.09 | 0.14  | -0.22 | -1.29 | 1.06  | 1.53  | -1.44 | -0.60 | -0.47 | 1.06  | 0.22  |
| Q8IUR0   | Trafficking protein particle complex subunit 5                         | TRAPPC5   | -0.64 | 1.02 | -0.38 | -0.65 | -0.71 | 1.49  | 1.42  | -0.56 | -0.55 | -0.86 | -0.61 | 1.41  |
| P35498   | Sodium channel protein type 1 subunit alpha                            | SCN1A     | -0.64 | 1.20 | -1.59 | 1.63  | 0.01  | 1.16  | 0.13  | -0.40 | 0.46  | -1.42 | 0.19  | -0.17 |
| P55316   | Forkhead box protein G1                                                | FOXG1     | -0.64 | 1.33 | 1.68  | 1.44  | -0.78 | -0.34 | -0.57 | -0.50 | -0.47 | -1.06 | 1.09  | -0.51 |
| Q9Y4F1   | FERM, ARHGEF and pleckstrin domain-containing protein 1                | FARP1     | -0.64 | 2.00 | 0.98  | 1.16  | -0.84 | -0.39 | 0.99  | 0.27  | -0.64 | -1.90 | 0.77  | -0.40 |
| Q92565   | Rap guanine nucleotide exchange factor 5                               | RAPGEF5   | -0.64 | 0.80 | -0.40 | -0.51 | -0.70 | 1.25  | 1.32  | -0.63 | 1.70  | -0.94 | -0.57 | -0.52 |
| O14686   | Histone-lysine N-methyltransferase 2D                                  | KMT2D     | -0.64 | 2.22 | 0.96  | 1.47  | -0.57 | 0.87  | -0.69 | -0.03 | 0.35  | -1.89 | 0.29  | -0.76 |
| Q96RF0   | Sorting nexin-18                                                       | SNX18     | -0.64 | 1.05 | 0.18  | 0.28  | 0.14  | 0.77  | -0.13 | 0.76  | -0.71 | -2.52 | 0.81  | 0.43  |
| Q53F19   | Nuclear cap-binding protein subunit 3                                  | NCBP3     | -0.64 | 0.93 | 1.50  | -1.05 | 0.23  | -0.03 | 0.42  | -1.02 | 1.51  | -1.44 | 0.04  | -0.18 |
| Q5XPI4   | E3 ubiquitin-protein ligase RNF123                                     | RNF123    | -0.64 | 0.78 | -1.57 | 1.44  | -0.04 | 0.86  | 0.25  | -1.36 | -0.13 | -0.84 | 0.95  | 0.43  |
| Q9P1Y5   | Calmodulin-regulated spectrin-associated protein 3                     | CAMSAP3   | -0.64 | 0.95 | 0.98  | 1.63  | -0.46 | 0.65  | -1.70 | -0.97 | -0.35 | 0.58  | 0.24  | -0.62 |

|        |                                                                   |          |       |      |       |       |       |       |       |       |       |       |       |       |
|--------|-------------------------------------------------------------------|----------|-------|------|-------|-------|-------|-------|-------|-------|-------|-------|-------|-------|
| Q9UQ16 | Dynamin-3                                                         | DNM3     | -0.64 | 1.46 | 0.75  | 1.75  | -0.41 | 0.58  | -1.14 | 0.00  | -0.03 | -1.85 | 0.30  | 0.05  |
| A6NHR9 | Structural maintenance of chromosomes flexible hinge domain-cc    | SMCHD1   | -0.64 | 0.62 | -0.25 | 0.62  | -1.41 | 0.94  | 0.88  | -1.26 | -1.38 | 0.21  | 0.87  | 0.78  |
| P23378 | Glycine dehydrogenase (decarboxylating), mitochondrial            | GLDC     | -0.65 | 1.59 | 2.77  | -0.24 | -0.53 | -0.06 | -0.22 | -0.05 | -0.28 | -0.83 | -0.31 | -0.23 |
| Q6NXS1 | Protein phosphatase inhibitor 2 family member B                   | PPP1R2B  | -0.65 | 0.58 | 1.50  | 0.32  | -1.02 | -0.87 | 0.80  | 0.71  | -0.93 | 1.19  | -0.88 | -0.81 |
| P23368 | NAD-dependent malic enzyme, mitochondrial                         | ME2      | -0.65 | 1.01 | -0.61 | 0.57  | 0.95  | -0.03 | 0.30  | -1.66 | -1.67 | 0.67  | 0.40  | 1.08  |
| Q99698 | Lysosomal-trafficking regulator                                   | LYST     | -0.65 | 0.66 | 0.28  | -0.66 | -1.24 | 0.87  | 1.58  | -1.08 | -1.11 | 0.40  | 1.07  | -0.11 |
| P25490 | Transcriptional repressor protein YY1                             | YY1      | -0.65 | 0.71 | 0.50  | 0.34  | -1.34 | 0.62  | 0.77  | -0.07 | -2.12 | -0.19 | 0.43  | 1.07  |
| Q726K5 | Arpin                                                             | ARPIN    | -0.65 | 0.71 | 0.20  | 0.47  | -0.39 | 0.69  | -0.08 | 0.37  | 0.05  | -2.64 | 0.91  | 0.41  |
| Q9BU61 | NADH dehydrogenase [ubiquinone] 1 alpha subcomplex assembly       | NDUFAF3  | -0.65 | 0.65 | -0.98 | 0.82  | 1.32  | 0.73  | -1.09 | -1.14 | 0.57  | -1.28 | 0.75  | 0.29  |
| Q5W0V3 | Protein FAM160B1                                                  | FAM160B1 | -0.65 | 1.03 | -0.50 | 1.04  | 1.34  | -1.09 | 0.39  | -1.42 | -1.30 | 0.69  | 0.44  | 0.41  |
| Q96PY6 | Serine/threonine protein kinase Nek1                              | NEK1     | -0.65 | 0.81 | 1.52  | -0.57 | -0.32 | -0.06 | 0.40  | -0.43 | -1.13 | -1.44 | 0.51  | 1.52  |
| O43818 | U3 small nuclear RNA-interacting protein 2                        | RRP9     | -0.65 | 1.20 | -1.86 | 1.92  | -0.08 | 0.97  | 0.43  | -0.61 | 0.03  | -0.49 | 0.04  | -0.36 |
| P46783 | 40S ribosomal protein S10                                         | RPS10    | -0.65 | 2.02 | -0.40 | -0.23 | 0.21  | 0.88  | 1.47  | -2.07 | 0.06  | 0.46  | 0.60  | -0.98 |
| Q12906 | Interleukin enhancer-binding factor 3                             | ILF3     | -0.65 | 2.34 | -0.77 | 1.78  | 0.25  | 0.34  | 0.52  | -2.13 | -0.19 | -0.29 | 0.36  | 0.12  |
| P51513 | RNA-binding protein Nova-1                                        | NOVA1    | -0.65 | 0.87 | 1.40  | -1.56 | -0.81 | 0.82  | 1.19  | 0.15  | -0.30 | -1.05 | 0.65  | -0.50 |
| Q8N653 | Leucine-zipper-like transcriptional regulator 1                   | LZTR1    | -0.65 | 1.44 | 0.31  | -0.63 | -1.05 | 1.89  | 1.02  | -0.64 | 0.53  | -1.22 | 0.44  | -0.64 |
| Q5THK1 | Protein PRR14L                                                    | PRR14L   | -0.65 | 0.42 | -1.36 | 0.06  | 0.57  | 0.81  | 0.47  | -1.45 | -1.43 | 0.66  | 0.85  | 0.81  |
| Q99426 | Tubulin-folding cofactor B                                        | TBCB     | -0.65 | 0.97 | 0.04  | -0.53 | 0.74  | 0.47  | 0.44  | -0.08 | -2.55 | 0.83  | 0.74  | -0.09 |
| Q6QEF8 | Coronin-6                                                         | CORO6    | -0.65 | 0.54 | -0.46 | -0.51 | -0.72 | 1.49  | 0.90  | -0.60 | -0.52 | -0.82 | 1.83  | -0.59 |
| Q96Q06 | Perilipin-4                                                       | PLIN4    | -0.65 | 1.06 | -0.48 | -1.30 | 1.35  | 0.08  | 1.56  | -1.04 | -1.05 | 0.48  | -0.21 | 0.62  |
| Q7L8C5 | Synaptotagmin-13                                                  | SYT13    | -0.65 | 0.91 | 0.89  | 0.96  | -1.01 | 0.23  | 0.01  | 0.32  | 1.36  | -1.98 | -0.55 | -0.22 |
| Q14254 | Flotillin-2                                                       | FLOT2    | -0.66 | 0.88 | 0.78  | 0.75  | -1.81 | 0.15  | 1.18  | 0.08  | 0.97  | -1.10 | -0.01 | -0.98 |
| P30711 | Glutathione S-transferase theta-1                                 | GSTT1    | -0.66 | 0.82 | -0.87 | 0.33  | 0.64  | 0.19  | 0.71  | -1.03 | -1.16 | 1.78  | 0.55  | -1.14 |
| Q9H3Z4 | DnaJ homolog subfamily C member 5                                 | DNAJC5   | -0.66 | 1.20 | 0.86  | 1.73  | -0.49 | -0.12 | -0.66 | -0.08 | 0.87  | -0.82 | -1.72 | 0.42  |
| Q14676 | Mediator of DNA damage checkpoint protein 1                       | MDC1     | -0.66 | 1.03 | 1.59  | 0.13  | -0.96 | 0.30  | 0.12  | 0.04  | 0.05  | -0.39 | 1.12  | -2.01 |
| Q6NXE6 | Armado repeat-containing protein 6                                | ARMC6    | -0.66 | 0.78 | -0.06 | -0.11 | -1.22 | 0.91  | 1.43  | 0.17  | -0.91 | -1.62 | 0.98  | 0.44  |
| P23471 | Receptor-type tyrosine-protein phosphatase zeta                   | PTPRZ1   | -0.66 | 0.99 | -1.00 | 0.10  | 0.27  | 0.92  | 0.86  | -1.45 | -1.46 | 1.06  | 0.96  | -0.25 |
| Q72616 | Rho GTPase-activating protein 30                                  | ARHGAP30 | -0.66 | 1.64 | 0.04  | 2.75  | -0.39 | -0.25 | -0.41 | -0.07 | -0.35 | -0.92 | -0.20 | -0.20 |
| Q8TV50 | LysM and putative peptidoglycan-binding domain-containing protein | LYSMD2   | -0.66 | 1.26 | 0.33  | 0.96  | -0.17 | -0.06 | 0.37  | 0.84  | 0.20  | -2.64 | -0.08 | 0.27  |
| P08572 | Collagen alpha-2(IV) chain                                        | COL4A2   | -0.66 | 0.85 | -0.48 | -0.63 | 1.98  | 0.02  | 0.12  | -1.45 | 0.80  | -0.97 | -0.23 | 0.83  |
| Q9P2K8 | eIF-2-alpha kinase GCN2                                           | EIF2AK4  | -0.66 | 0.98 | -0.57 | 0.41  | -1.09 | 1.22  | 1.15  | -0.16 | -0.44 | -1.74 | 0.09  | 1.11  |
| Q9H8T0 | AKT-interacting protein                                           | AKTIP    | -0.66 | 1.36 | 2.80  | -0.25 | -0.47 | -0.20 | -0.37 | -0.06 | -0.25 | -0.69 | -0.28 | -0.25 |
| Q16774 | Guanylate kinase                                                  | GUK1     | -0.66 | 1.17 | 0.90  | 0.79  | -0.49 | 0.43  | -0.31 | 0.71  | 0.63  | -2.47 | -0.01 | -0.17 |
| Q6NYC8 | Phostensin                                                        | PPP1R18  | -0.66 | 1.00 | 0.74  | 2.01  | -1.04 | 0.29  | -0.84 | 0.32  | -0.87 | -0.91 | -0.51 | 0.79  |
| P62917 | 60S ribosomal protein L8                                          | RPL8     | -0.66 | 0.74 | -0.85 | -0.78 | 0.05  | -0.11 | 2.62  | -0.66 | -0.47 | 0.35  | -0.07 | -0.07 |
| P56385 | ATP synthase subunit e, mitochondrial                             | ATP5ME   | -0.66 | 0.47 | 0.48  | -0.83 | -0.91 | 1.55  | 0.32  | -0.79 | -0.82 | -1.02 | 1.45  | 0.56  |
| Q8TEA7 | TBC domain-containing protein kinase-like protein                 | TBCK     | -0.66 | 1.49 | 0.08  | 2.77  | -0.49 | -0.24 | -0.49 | -0.20 | -0.25 | -0.77 | -0.29 | -0.12 |
| Q9NRY4 | Rho GTPase-activating protein 35                                  | ARHGAP35 | -0.67 | 1.14 | 0.13  | 1.09  | -0.70 | 0.77  | -0.01 | -0.15 | 0.89  | -2.37 | 0.49  | -0.15 |
| Q9NQC1 | E3 ubiquitin-protein ligase Jade-2                                | JADE2    | -0.67 | 1.53 | 2.77  | -0.06 | -0.55 | -0.24 | -0.25 | -0.18 | -0.31 | -0.84 | -0.23 | -0.10 |
| Q9UKA4 | A-kinase anchor protein 11                                        | AKAP11   | -0.67 | 1.55 | 1.78  | 0.33  | -0.84 | 0.98  | -0.66 | -0.48 | -0.53 | -1.26 | -0.47 | 1.14  |
| O43310 | CBP80/20-dependent translation initiation factor                  | CTIF     | -0.67 | 0.98 | 1.03  | 0.80  | -0.57 | 0.64  | -0.76 | 0.87  | -2.15 | -0.49 | 0.64  | -0.01 |
| Q8NE09 | Regulator of G-protein signaling 22                               | RGS22    | -0.67 | 0.39 | -1.24 | -0.30 | 1.13  | 0.33  | 0.61  | -1.25 | -1.24 | 1.51  | 0.47  | -0.01 |
| Q9UJC3 | Protein Hook homolog 1                                            | HOOK1    | -0.67 | 0.60 | 0.84  | -0.85 | -1.13 | 0.13  | 1.76  | 0.07  | 0.69  | -1.29 | -0.83 | 0.60  |
| Q5JR59 | Microtubule-associated tumor suppressor candidate 2               | MTUS2    | -0.67 | 1.48 | 2.80  | -0.14 | -0.60 | -0.05 | -0.38 | -0.19 | -0.27 | -0.61 | -0.26 | -0.30 |
| Q9BPUE | Dihydropyrimidinase-related protein 5                             | DPYSL5   | -0.67 | 1.08 | -1.35 | 0.83  | 0.67  | 0.21  | 0.87  | -0.97 | -1.65 | 1.23  | 0.23  | -0.06 |
| Q9BUR5 | MICOS complex subunit MIC26                                       | APOO     | -0.67 | 0.70 | 0.47  | -1.07 | -1.19 | 1.07  | 1.60  | -0.12 | -0.55 | -1.27 | 0.67  | 0.39  |
| Q6ZVM7 | TOM1-like protein 2                                               | TOM1L2   | -0.67 | 0.97 | -0.23 | 1.28  | 1.04  | 0.07  | -1.04 | 0.83  | 0.84  | -1.80 | -0.48 | -0.52 |
| Q7LSY9 | E3 ubiquitin-protein transferase MAEA                             | MAEA     | -0.67 | 1.25 | 1.04  | 0.88  | -0.64 | -0.15 | 0.25  | 0.63  | 1.04  | -2.18 | -0.59 | -0.29 |
| Q9Y6A4 | Cilia- and flagella-associated protein 20                         | CFAP20   | -0.67 | 1.67 | 0.05  | -0.62 | 0.54  | 0.82  | 0.92  | -0.98 | -2.25 | 0.52  | 0.54  | 0.46  |
| Q8TV36 | Protein HID1                                                      | HID1     | -0.67 | 1.64 | -0.02 | 2.75  | -0.60 | -0.10 | -0.29 | -0.08 | -0.32 | -0.85 | -0.39 | -0.10 |
| Q9P2R7 | Succinate--CoA ligase [ADP-forming] subunit beta, mitochondrial   | SUCLA2   | -0.67 | 1.29 | -0.19 | 0.90  | 1.33  | -0.13 | -0.50 | -1.19 | 1.50  | -1.54 | -0.31 | 0.12  |
| Q7Z7K6 | Centromere protein V                                              | CENPV    | -0.67 | 0.89 | 1.10  | -1.58 | -0.71 | 0.48  | 1.78  | 0.09  | -0.97 | -0.25 | 0.48  | -0.41 |
| Q8TCS8 | Polyribonucleotide nucleotidyltransferase 1, mitochondrial        | PNPT1    | -0.67 | 1.01 | -0.43 | 0.56  | 2.17  | -0.54 | -0.59 | -0.55 | 1.25  | -0.92 | -0.47 | -0.47 |
| Q56555 | Protein kinase C delta type                                       | PRKCD    | -0.67 | 1.22 | 0.14  | 1.91  | -0.53 | -0.26 | 0.07  | 0.68  | 0.64  | -1.96 | -0.33 | -0.36 |
| Q8NI08 | Nuclear receptor coactivator 7                                    | NCOA7    | -0.68 | 1.02 | 0.15  | 1.26  | 0.40  | -0.43 | -0.20 | -0.52 | 1.96  | -1.32 | -0.28 | -1.03 |
| Q8IU77 | Armado repeat-containing protein 8                                | ARMC8    | -0.68 | 0.91 | 1.56  | 1.35  | -1.03 | 0.14  | -0.95 | -0.75 | -0.13 | -1.26 | 0.49  | 0.59  |
| Q8TAM6 | Ermin                                                             | ERMN     | -0.68 | 0.76 | -0.31 | -0.27 | 0.90  | 0.56  | 0.06  | -0.51 | -2.38 | 1.10  | 0.76  | 0.09  |
| Q9NRD5 | PRKCA-binding protein                                             | PICK1    | -0.68 | 2.96 | -1.26 | 0.55  | 0.89  | 0.39  | 1.96  | -0.21 | -0.76 | -0.95 | 0.26  | -0.87 |
| P46776 | 60S ribosomal protein L27a                                        | RPL27A   | -0.68 | 0.82 | -0.44 | -1.05 | 0.58  | -0.45 | 2.36  | -0.27 | 0.45  | -1.06 | -0.34 | 0.23  |
| P24043 | Laminin subunit alpha-2                                           | LAMA2    | -0.68 | 5.15 | 0.88  | -0.41 | 1.12  | 1.45  | 0.22  | -0.53 | -1.93 | -0.81 | 0.02  | -0.01 |
| Q9NQ89 | Protein C12orf4                                                   | C12orf4  | -0.68 | 0.82 | 1.02  | 0.56  | -1.06 | 0.57  | -0.10 | 0.32  | 1.02  | -2.25 | -0.07 | -0.01 |
| O00750 | Phosphatidylinositol 4-phosphate 3-kinase C2 domain-containing s  | PIK3C2B  | -0.68 | 1.43 | -0.06 | 2.79  | -0.59 | -0.17 | -0.38 | -0.18 | -0.29 | -0.71 | -0.18 | -0.23 |
| Q96KJ2 | DDB1- and CUL4-associated factor 5                                | DCAF5    | -0.68 | 2.09 | 2.62  | -0.22 | -0.60 | 0.51  | -0.25 | -0.31 | -0.22 | -1.07 | -0.33 | -0.12 |
| Q6PID6 | Tetratricopeptide repeat protein 33                               | TTC33    | -0.68 | 1.53 | 2.78  | -0.09 | -0.57 | -0.17 | -0.28 | -0.14 | -0.16 | -0.79 | -0.36 | -0.21 |
| Q9Y257 | Polymerase delta-interacting protein 2                            | POLDIP2  | -0.68 | 1.72 | -0.18 | -0.31 | 2.79  | -0.19 | -0.31 | -0.28 | -0.32 | -0.86 | -0.20 | -0.15 |
| O75077 | Disintegrin and metalloprotease domain-containing protein 23      | ADAM23   | -0.68 | 1.38 | -1.36 | 0.02  | 0.76  | 0.15  | 1.92  | -1.12 | -1.09 | 0.65  | 0.11  | -0.04 |
| Q9H307 | Pinin                                                             | PNN      | -0.68 | 1.02 | 0.54  | -1.67 | 1.30  | 0.22  | 0.78  | 0.16  | -1.83 | 0.42  | 0.09  | 0.00  |
| Q02086 | Transcription factor Sp2                                          | SP2      | -0.68 | 1.03 | -0.40 | -0.55 | -0.71 | 1.22  | 1.62  | -0.49 | -0.50 | -0.96 | 1.44  | -0.67 |
| Q92782 | Zinc finger protein neuro-d4                                      | DPF1     | -0.68 | 1.10 | 2.72  | -0.35 | -0.61 | -0.21 | -0.26 | 0.39  | -0.35 | -0.69 | -0.39 | -0.24 |
| Q9Y263 | Phospholipase A-2-activating protein                              | PLAA     | -0.68 | 0.57 | -1.61 | 0.56  | 0.50  | 0.59  | 0.68  | -1.71 | -0.93 | 0.77  | 0.68  | 0.46  |
| Q9H902 | Receptor expression-enhancing protein 1                           | REEP1    | -0.68 | 1.79 | -0.52 | 1.67  | -1.03 | 0.32  | 1.34  | -0.70 | -0.04 | -1.53 | 0.14  | 0.35  |
| Q8TEV9 | Guanine nucleotide exchange protein SMCR8                         | SMCR8    | -0.68 | 0.83 | -0.39 | 1.21  | -1.00 | 0.30  | 0.87  | -2.17 | 0.84  | 0.32  | 0.15  | -0.13 |
| Q8TCT0 | Ceramide kinase                                                   | CERK     | -0.68 | 2.45 | 2.38  | -0.23 | -0.62 | 0.96  | -0.22 | -0.26 | -0.36 | -1.05 | 0.19  | -0.79 |
| Q8N5C8 | TGF-beta-activated kinase 1 and MAP3K7-binding protein 3          | TAB3     | -0.68 | 0.82 | 1.15  | 1.01  | -1.39 | 0.50  | -0.30 | 1.28  | -0.46 | -1.44 | 0.26  | -0.63 |
| P09038 | Fibroblast growth factor 2                                        | FGF2     | -0.68 | 0.45 | -0.72 | -1.20 | 0.55  | 0.43  | 1.52  | -0.35 | -1.80 | 0.61  | 0.34  | 0.61  |
| B7ZAP0 | Rab GTPase-activating protein 1-like, isoform 10                  | RABGAP1L | -0.68 | 1.43 | -0.03 | 2.80  | -0.59 | -0.28 | -0.31 | -0.21 | -0.32 | -0.62 | -0.28 | -0.17 |
| P16220 | Cyclic AMP-responsive element-binding protein 1                   | CREB1    | -0.68 | 1.06 | 1.60  | -1.53 | 1.05  | 0.34  | -0.24 | -0.31 | 0.65  | 0.01  | -0.05 | -1.52 |
| Q8N3D4 | BH domain-binding protein 1-like protein 1                        | BHBPL1   | -0.68 | 1.53 | -0.06 | 2.78  | -0.45 | -0.13 | -0.47 | -0.26 | -0.17 | -0.82 | -0.21 | -0.21 |
| Q9H367 | Vacuolar protein sorting-associated protein 33B                   | VPS33B   | -0.68 | 0.94 | 0.04  | 1.56  | -0.37 | 0.60  | -0.73 | 0.02  | 0.70  | -2.23 | 0.27  | 0.14  |
| Q9BY32 | Inosine triphosphate pyrophosphatase                              | ITPA     | -0.69 | 0.87 | -0.70 | 1.60  | -1.05 | 0.57  | 0.62  | -0.85 | -0.86 | 1.38  | 0.16  | -0.85 |
| P02686 | Myelin basic protein                                              | MBP      | -0.69 | 0.98 | -0.34 | -0.36 | 2.22  | 0.48  | -0.86 | -0.83 | -0.84 | 0.70  | 0.61  | -0.78 |
| Q9NQW7 | Xaa-Pro aminopeptidase 1                                          | XPNPEP1  | -0.69 | 0.81 | -1.44 | 0.28  | 0.39  | 0.19  | 1.56  | -1.55 | -0.93 | 0.61  | 0.74  | 0.16  |
| Q2TAL8 | Glutamine-rich protein 1                                          | QRICH1   | -0.69 | 0.84 | 1.31  | -0.54 | -1.02 | 0.74  | 0.51  | 0.74  | -1.73 | -1.01 | 0.74  | 0.25  |

|        |                                                                   |           |       |      |       |       |       |       |       |       |       |       |       |       |
|--------|-------------------------------------------------------------------|-----------|-------|------|-------|-------|-------|-------|-------|-------|-------|-------|-------|-------|
| Q5T0D9 | Tumor protein p63-regulated gene 1-like protein                   | TPRG1L    | -0.69 | 1.53 | 0.04  | 1.39  | -0.16 | 0.18  | 0.17  | -0.67 | 0.30  | -2.38 | 0.31  | 0.83  |
| Q9UMR2 | ATP-dependent RNA helicase DDX19B                                 | DDX19B    | -0.69 | 1.51 | 0.15  | 1.06  | -0.72 | 0.46  | 0.65  | 0.52  | 0.77  | -2.39 | -0.32 | -0.16 |
| Q12933 | TNF receptor-associated factor 2                                  | TRAF2     | -0.69 | 1.07 | 0.81  | 1.08  | -1.19 | 0.98  | -0.46 | 0.33  | 0.31  | -1.98 | -0.41 | 0.54  |
| Q8N1G1 | RNA exonuclease 1 homolog                                         | REXO1     | -0.69 | 1.56 | -0.34 | -0.07 | -0.99 | 0.91  | 2.10  | -0.68 | 0.52  | -1.19 | 0.33  | -0.60 |
| O60264 | SWI/SNF-related matrix-associated actin-dependent regulator of    | SMARCA5   | -0.69 | 1.39 | -0.92 | 1.53  | 0.20  | 0.61  | 0.06  | -1.31 | -0.67 | -1.27 | 0.78  | 0.99  |
| P06576 | ATP synthase subunit beta, mitochondrial                          | ATP5F1B   | -0.69 | 1.88 | 0.46  | 0.27  | -1.52 | -0.20 | -0.19 | -2.27 | -0.49 | 0.93  | 0.16  | -0.18 |
| Q92581 | Sodium/hydrogen exchanger 6                                       | SLC9A6    | -0.69 | 1.32 | 1.23  | 0.99  | -1.79 | 0.23  | 0.78  | -1.48 | -0.25 | -0.41 | 0.38  | 0.32  |
| O75334 | Liprin-alpha-2                                                    | PPF1A2    | -0.69 | 1.57 | 1.24  | 0.98  | -1.12 | 0.47  | 0.04  | 0.14  | 0.72  | -2.00 | 0.19  | -0.66 |
| Q96AX9 | E3 ubiquitin-protein ligase MIB2                                  | MIB2      | -0.69 | 1.21 | 1.43  | 0.49  | -1.20 | 0.30  | 0.32  | 1.15  | -0.15 | -1.87 | 0.01  | -0.47 |
| P53675 | Clathrin heavy chain 2                                            | CLTC1L    | -0.69 | 1.64 | -0.07 | -0.31 | -0.58 | -0.06 | 2.79  | -0.30 | -0.31 | -0.68 | -0.13 | -0.33 |
| Q9NVE7 | Pantothenate kinase 4                                             | PANK4     | -0.69 | 1.84 | 1.42  | 0.17  | 0.52  | 0.49  | -0.78 | 0.49  | 0.28  | -2.32 | 0.09  | -0.35 |
| Q08J23 | tRNA (cytosine(34)-C(5))-methyltransferase                        | NSUN2     | -0.69 | 1.11 | 1.78  | 0.14  | -1.28 | 0.35  | 0.25  | -0.23 | 0.43  | -1.82 | -0.24 | 0.61  |
| Q12756 | Kinesin-like protein KIF1A                                        | KIF1A     | -0.69 | 1.03 | -0.90 | 2.04  | -0.37 | 0.42  | -0.01 | -1.13 | -1.30 | 0.07  | 0.49  | 0.69  |
| Q9NVQ4 | Fas apoptotic inhibitory molecule 1                               | FAIM      | -0.69 | 0.99 | -0.91 | 0.45  | -0.10 | 1.17  | 0.54  | -0.95 | -1.08 | -1.26 | 1.50  | 0.63  |
| Q00613 | Heat shock factor protein 1                                       | HSF1      | -0.69 | 1.38 | 2.78  | -0.30 | -0.56 | -0.11 | -0.27 | -0.15 | -0.25 | -0.77 | -0.33 | -0.02 |
| Q8IX12 | Cell division cycle and apoptosis regulator protein 1             | CCAR1     | -0.69 | 1.40 | 0.17  | 1.29  | 1.10  | -1.48 | 0.40  | -0.74 | -0.56 | 1.31  | -0.85 | -0.63 |
| Q6P2Q9 | Pre-mRNA-processing-splicing factor 8                             | PRPF8     | -0.70 | 0.79 | 0.62  | 0.20  | 0.25  | 0.40  | -0.49 | 0.84  | -2.61 | 0.62  | 0.40  | -0.23 |
| P40938 | Replication factor C subunit 3                                    | RFC3      | -0.70 | 1.01 | 1.02  | 1.71  | 0.02  | 0.08  | -1.65 | 0.21  | 0.54  | -1.12 | 0.03  | -0.84 |
| Q13425 | Beta-2-syntrophin                                                 | SNTB2     | -0.70 | 0.90 | 0.73  | 0.69  | -1.08 | 0.28  | 0.45  | 0.12  | 0.12  | -2.42 | 0.48  | 0.64  |
| Q96PE2 | Rho guanine nucleotide exchange factor 17                         | ARHGGEF17 | -0.70 | 0.79 | 0.53  | -0.40 | -0.33 | 0.28  | 0.90  | -0.62 | 0.79  | -2.40 | 0.54  | 0.72  |
| Q8IXW5 | Putative RNA polymerase II subunit B1 CTD phosphatase RPA2        | RPA2      | -0.70 | 1.38 | 2.78  | -0.23 | -0.41 | -0.27 | -0.33 | -0.10 | -0.22 | -0.85 | -0.20 | -0.16 |
| Q99884 | Sodium-dependent proline transporter                              | SLC6A7    | -0.70 | 0.79 | 0.01  | 1.69  | -0.83 | 0.02  | 0.07  | -0.70 | 1.84  | -0.99 | -0.53 | -0.56 |
| Q9H871 | E3 ubiquitin-protein transferase RMNDSA                           | RMNDSA    | -0.70 | 0.57 | -0.79 | 0.31  | 0.50  | 0.13  | 0.57  | -1.50 | -1.51 | 1.73  | 0.27  | 0.27  |
| Q8IVF5 | T-lymphoma invasion and metastasis-inducing protein 2             | TIAM2     | -0.70 | 1.69 | 1.15  | 0.41  | -1.60 | 0.82  | 0.93  | 0.03  | -1.01 | -1.45 | 0.32  | 0.41  |
| Q9Y3C6 | Peptidyl-prolyl cis-trans isomerase-like 1                        | PP1L1     | -0.70 | 1.81 | 0.21  | 1.22  | -0.18 | 0.88  | -0.31 | 0.41  | -1.90 | -1.44 | 0.73  | 0.39  |
| Q12583 | Ras GTPase-activating protein 2                                   | RASA2     | -0.70 | 0.89 | 1.85  | -0.18 | -1.22 | 0.53  | 0.07  | -0.39 | 1.14  | -1.35 | 0.21  | -0.67 |
| P23468 | Receptor-type tyrosine-protein phosphatase delta                  | PTPRD     | -0.70 | 1.00 | 1.99  | 0.35  | -0.52 | 0.51  | -1.17 | -0.22 | 0.53  | -0.60 | 0.56  | -1.43 |
| Q13085 | Acetyl-CoA carboxylase 1                                          | ACACA     | -0.70 | 1.74 | 0.81  | 1.42  | -0.68 | 0.47  | -0.29 | 0.32  | 0.81  | -2.06 | -0.08 | -0.73 |
| Q96CM8 | Medium-chain acyl-CoA ligase ACSF2, mitochondrial                 | ACSF2     | -0.70 | 1.30 | -0.65 | 0.41  | 1.98  | -0.65 | 0.32  | -0.83 | -0.67 | -1.29 | 0.36  | 1.02  |
| P25205 | DNA replication licensing factor MCM3                             | MCM3      | -0.70 | 1.43 | 2.80  | -0.28 | -0.44 | -0.28 | -0.22 | -0.12 | -0.27 | -0.76 | -0.32 | -0.10 |
| Q9H0M0 | NEDD4-like E3 ubiquitin-protein ligase WWP1                       | WWP1      | -0.70 | 1.04 | 0.63  | 1.62  | -1.07 | 0.91  | -0.91 | 0.45  | -0.96 | -1.35 | 0.26  | 0.40  |
| Q00169 | Phosphatidylinositol transfer protein alpha isoform               | PITPNIA   | -0.70 | 1.14 | -0.44 | -0.11 | 0.47  | 0.52  | 0.88  | -1.33 | -2.08 | 0.70  | 0.72  | 0.68  |
| Q6ZVC0 | Neuronal tyrosine-phosphorylated phosphoinositide-3-kinase adapt  | NYAP1     | -0.70 | 0.91 | 0.09  | 1.47  | -1.60 | 0.54  | 0.57  | 0.17  | 0.52  | -1.75 | 0.37  | -0.38 |
| Q01081 | Splicing factor U2AF 35 kDa subunit                               | U2AF1     | -0.70 | 1.34 | 1.39  | -1.01 | 0.35  | 0.43  | 0.29  | 0.56  | -2.21 | -0.47 | 0.42  | 0.27  |
| O43318 | Mitogen-activated protein kinase kinase kinase 7                  | MAP3K7    | -0.70 | 0.93 | 0.23  | 1.70  | -0.72 | 0.48  | -0.60 | -1.88 | -0.50 | -0.20 | 0.79  | 0.71  |
| P52747 | Zinc finger protein 143                                           | ZNF143    | -0.70 | 1.17 | 1.98  | -0.54 | -0.67 | -0.71 | 1.26  | 0.08  | -0.57 | -1.05 | 0.74  | -0.52 |
| Q9NWZ5 | Uridine-cytidine kinase-like 1                                    | UCKL1     | -0.70 | 0.90 | 0.95  | -0.03 | -1.40 | 1.02  | 0.51  | -0.04 | -1.21 | -1.44 | 0.85  | 0.78  |
| P05161 | Ubiquitin-like protein ISG15                                      | ISG15     | -0.70 | 0.70 | -1.47 | 1.53  | 0.56  | 0.19  | 0.06  | 0.05  | -1.90 | 0.08  | 0.19  | 0.71  |
| O14827 | Ras-specific guanine nucleotide-releasing factor 2                | RASGRF2   | -0.70 | 0.90 | 0.87  | 0.08  | -0.34 | 0.43  | 0.05  | 1.16  | 0.84  | -2.33 | -0.09 | -0.67 |
| O95758 | Polypyrimidine tract-binding protein 3                            | PTBP3     | -0.71 | 0.65 | 1.22  | -1.19 | -0.69 | 0.70  | 0.76  | 0.56  | -1.17 | -1.43 | 0.50  | 0.75  |
| Q9NWB1 | RNA binding protein fox-1 homolog 1                               | RBFox1    | -0.71 | 0.87 | 0.49  | -1.74 | 0.12  | 0.66  | 1.50  | -1.51 | -0.51 | 0.17  | 0.66  | 0.16  |
| O95810 | Caveolae-associated protein 2                                     | CAVIN2    | -0.71 | 0.80 | 1.47  | 0.37  | -1.65 | 0.24  | 0.53  | 0.53  | 0.81  | -1.31 | 0.01  | -1.00 |
| P11234 | Ras-related protein Rab-B                                         | RALB      | -0.71 | 2.22 | 0.41  | 1.07  | 0.40  | 0.26  | 0.00  | 0.19  | -1.99 | -1.57 | 0.27  | 0.96  |
| Q92614 | Unconventional myosin-XVIIIa                                      | MYO18A    | -0.71 | 1.59 | -0.72 | 1.72  | -0.03 | 0.84  | -0.18 | -0.63 | 0.67  | -1.97 | 0.28  | 0.02  |
| Q96N21 | AP-4 complex accessory subunit Tepsin                             | TEPSIN    | -0.71 | 1.84 | 2.76  | -0.05 | -0.49 | -0.12 | -0.22 | -0.28 | -0.31 | -0.91 | -0.26 | -0.12 |
| O00194 | Ras-related protein Rab-27B                                       | RAB27B    | -0.71 | 1.61 | 0.14  | 2.74  | -0.62 | -0.09 | -0.44 | -0.32 | -0.25 | -0.83 | -0.13 | -0.20 |
| Q9H444 | Charged multivesicular body protein 4b                            | CHMP4B    | -0.71 | 2.33 | -0.27 | 0.35  | 0.33  | -0.25 | 1.95  | -1.68 | 0.50  | -1.17 | -0.31 | 0.55  |
| Q9HF65 | Coiled-coil domain-containing protein 86                          | CCDC86    | -0.71 | 1.62 | 0.30  | -1.17 | 1.71  | 0.43  | 0.38  | -1.38 | -0.17 | -0.44 | -0.85 | 1.20  |
| Q9H6W3 | Ribosomal oxygenase 1                                             | RIOX1     | -0.71 | 1.78 | -0.07 | -0.25 | 2.78  | -0.34 | -0.28 | -0.20 | -0.40 | -0.84 | -0.23 | -0.17 |
| P51665 | 26S proteasome non-ATPase regulatory subunit 7                    | PSMD7     | -0.71 | 1.38 | -0.30 | -0.60 | -0.80 | 1.00  | 2.19  | 0.74  | -0.36 | -1.04 | -0.48 | -0.36 |
| Q15291 | Retinoblastoma-binding protein 5                                  | RBBP5     | -0.71 | 1.73 | -0.67 | 1.45  | -1.08 | 1.47  | 0.57  | -0.79 | -0.93 | 0.32  | 0.58  | -0.92 |
| Q86X10 | Ral GTPase-activating protein subunit beta                        | RALGAPB   | -0.71 | 2.46 | -0.03 | 0.53  | -0.47 | 0.99  | 1.18  | -0.89 | -1.95 | -0.75 | 0.52  | 0.84  |
| Q14318 | Peptidyl-prolyl cis-trans isomerase FKBP8                         | FKBP8     | -0.71 | 1.88 | 1.60  | -0.66 | -0.55 | 1.15  | 0.29  | -0.29 | -0.60 | -1.76 | 0.86  | -0.04 |
| Q9H4L4 | Sentrin-specific protease 3                                       | SEN3      | -0.71 | 2.95 | 0.29  | -0.68 | 0.63  | 1.16  | 1.07  | -2.19 | -0.78 | -0.02 | 0.41  | 0.12  |
| Q9NZ08 | Endoplasmic reticulum aminopeptidase 1                            | ERAP1     | -0.71 | 0.87 | -0.49 | 0.97  | 1.93  | -0.71 | -0.67 | -0.73 | 0.54  | -1.00 | -0.73 | 0.88  |
| P82970 | High mobility group nucleosome-binding domain-containing protein  | HMGN5     | -0.71 | 2.44 | -0.08 | 2.20  | 0.06  | -0.08 | 0.07  | -1.37 | -0.48 | -0.43 | -0.89 | 1.01  |
| Q9H6Z4 | Ran-binding protein 3                                             | RANBP3    | -0.71 | 0.88 | -1.27 | 0.42  | 0.17  | 1.23  | 0.49  | -1.91 | -0.75 | 0.47  | 1.00  | 0.14  |
| O43147 | Small G protein signaling modulator 2                             | SGSM2     | -0.71 | 1.00 | -0.70 | 1.63  | -1.00 | 1.56  | -0.32 | -0.68 | -0.79 | 0.63  | 0.46  | -0.79 |
| Q08257 | Quinone oxidoreductase                                            | CRY2      | -0.71 | 1.04 | -1.46 | 0.70  | 0.88  | 0.47  | 0.59  | -1.36 | -1.49 | 0.72  | 0.47  | 0.48  |
| P42685 | Tyrosine-protein kinase FRK                                       | FRK       | -0.71 | 0.52 | -1.39 | 0.72  | 0.25  | 0.73  | 0.37  | -1.43 | -1.43 | 0.42  | 0.93  | 0.83  |
| P57723 | Poly(rC)-binding protein 4                                        | PCBP4     | -0.72 | 1.03 | 0.19  | -0.07 | -0.49 | 1.32  | 0.24  | 0.73  | -2.02 | -0.67 | 1.26  | -0.50 |
| P04350 | Tubulin beta-4A chain                                             | TUBB4A    | -0.72 | 2.52 | 0.65  | 1.54  | -0.91 | 0.47  | 0.47  | -0.29 | 0.21  | -2.18 | 0.17  | -0.13 |
| Q9NW64 | Pre-mRNA-splicing factor RBM22                                    | RBM22     | -0.72 | 1.14 | 1.30  | -0.33 | -1.10 | 0.37  | 1.03  | 0.47  | -1.21 | -1.59 | 0.50  | 0.56  |
| Q9ULH4 | Leucine-rich repeat and fibronectin type-III domain-containing pr | LRFN2     | -0.72 | 1.47 | -0.01 | 2.80  | -0.56 | -0.27 | -0.33 | -0.27 | -0.25 | -0.62 | -0.22 | -0.25 |
| Q8ND24 | RING finger protein 214                                           | RNF214    | -0.72 | 1.01 | -0.59 | 1.24  | 1.14  | 0.61  | -1.23 | -1.23 | -1.33 | 0.52  | 0.50  | 0.38  |
| Q9Y3Z3 | Deoxynucleoside triphosphate triphosphohydrolase SAMHD1           | SAMHD1    | -0.72 | 1.22 | -0.32 | -0.21 | 0.50  | 0.98  | 0.43  | -0.08 | -2.60 | 0.18  | 0.72  | 0.40  |
| O00478 | Butyrophilin subfamily 3 member A3                                | BTN3A3    | -0.72 | 1.05 | 0.10  | 1.19  | -0.36 | 0.99  | -0.72 | -0.03 | -1.41 | -1.52 | 1.11  | 0.65  |
| Q6P3X3 | Tetratricopeptide repeat protein 27                               | TTC27     | -0.72 | 0.83 | 0.71  | -0.56 | -0.67 | -0.46 | 1.97  | 1.45  | -0.51 | -0.85 | -0.53 | -0.55 |
| O05329 | Glutamate decarboxylase 2                                         | GAD2      | -0.72 | 2.39 | -0.53 | 1.93  | -0.30 | 0.74  | 0.29  | -0.53 | 0.05  | -1.98 | 0.12  | 0.20  |
| P13492 | Phosphatidylinositol-binding clathrin assembly protein            | PICALM    | -0.72 | 1.87 | 0.38  | 0.70  | -0.06 | 0.42  | 0.48  | -1.18 | 1.76  | -1.70 | -0.04 | -0.76 |
| P37275 | Zinc finger E-box-binding homeobox 1                              | ZEB1      | -0.72 | 1.74 | 2.77  | -0.13 | -0.52 | -0.14 | -0.16 | -0.12 | -0.27 | -0.87 | -0.34 | -0.23 |
| P31943 | Heterogeneous nuclear ribonucleoprotein H                         | HNRNP1H   | -0.72 | 1.53 | 1.47  | -1.03 | -0.93 | 0.81  | 1.27  | 0.08  | -0.68 | -1.36 | 0.53  | -0.17 |
| Q8IU66 | Histone H2A type 2-B                                              | HIST2H2AB | -0.72 | 0.48 | -0.20 | -1.66 | 1.36  | 0.66  | 0.47  | -0.24 | -1.67 | 0.00  | 0.65  | 0.63  |
| Q9BRK0 | Receptor expression-enhancing protein 2                           | REEP2     | -0.72 | 1.37 | -1.08 | -0.16 | 0.29  | 0.16  | 2.27  | -0.10 | -1.57 | 0.10  | 0.22  | -0.12 |
| P60245 | Protocadherin-7                                                   | PCDH7     | -0.72 | 1.50 | -0.05 | 2.80  | -0.59 | -0.22 | -0.30 | -0.26 | -0.30 | -0.62 | -0.30 | -0.16 |
| O75122 | CLIP-associating protein 2                                        | CLASP2    | -0.72 | 1.51 | -0.87 | 1.63  | 0.39  | -0.39 | 0.81  | -1.14 | 0.67  | -1.36 | -0.58 | 0.84  |
| Q12980 | GATOR complex protein NPRL3                                       | NPRL3     | -0.72 | 1.57 | 2.81  | -0.29 | -0.44 | -0.14 | -0.24 | -0.37 | -0.38 | -0.66 | -0.15 | -0.15 |
| P20042 | Eukaryotic translation initiation factor 2 subunit 2              | EIF2S2    | -0.72 | 2.66 | 0.23  | 0.83  | -0.15 | -0.09 | 1.50  | -1.20 | -1.25 | -0.94 | -0.35 | 1.41  |
| Q27J81 | Inverted formin-2                                                 | INF2      | -0.72 | 1.79 | -0.50 | 2.17  | 0.17  | 0.58  | -0.63 | -0.44 | -1.27 | -0.98 | 0.69  | 0.23  |
| P22897 | Macrophage mannose receptor 1                                     | MRC1      | -0.72 | 0.97 | -0.35 | -0.55 | -0.81 | 1.89  | 0.95  | 1.35  | -0.54 | -0.86 | -0.61 | -0.48 |
| Q96GD0 | Pyridoxal phosphate phosphatase                                   | PDXP      | -0.72 | 3.30 | -0.43 | 1.20  | 0.03  | 1.11  | 0.71  | -1.95 | -0.91 | 0.04  | 0.80  | -0.61 |
| Q92843 | Bcl-2-like protein 2                                              | BCL2L2    | -0.73 | 0.80 | -0.26 | 0.81  | -1.49 | 1.11  | 0.80  | -0.05 | -1.38 | -1.04 | 0.87  | 0.64  |
| P12270 | Nucleoprotein TPR                                                 | TPR       | -0.73 | 0.90 | 0.63  | -1.00 | 0.94  | -0.05 | 0.55  | -1.06 | 0.32  | 1.75  | -1.06 | -1.01 |



|        |                                                                      |           |       |      |       |       |       |       |       |       |       |       |       |       |
|--------|----------------------------------------------------------------------|-----------|-------|------|-------|-------|-------|-------|-------|-------|-------|-------|-------|-------|
| Q6VAB6 | Kinase suppressor of Ras 2                                           | KSR2      | -0.73 | 0.89 | 0.42  | 0.20  | -1.01 | 0.60  | 0.85  | 0.08  | -2.27 | 1.02  | 0.54  | -0.43 |
| O75530 | Polycomb protein EED                                                 | EED       | -0.73 | 1.11 | -0.34 | 2.17  | -0.78 | -0.57 | 0.78  | -0.46 | 1.06  | -0.96 | -0.48 | -0.42 |
| Q96Q07 | BTB/POZ domain-containing protein 9                                  | BTBD9     | -0.73 | 0.73 | 0.06  | 0.71  | -1.39 | 1.19  | 0.32  | -1.22 | 0.76  | -1.53 | 0.66  | 0.44  |
| Q9Y6X4 | Soluble lamin-associated protein of 75 kDa                           | FAM169A   | -0.73 | 2.88 | -0.05 | -0.48 | 1.17  | -0.41 | 2.31  | -0.29 | -0.19 | -1.18 | -0.43 | -0.45 |
| Q8NFA0 | Ubiquitin carboxyl-terminal hydrolase 32                             | USP32     | -0.73 | 3.19 | 1.29  | 0.87  | 1.48  | -0.35 | -0.72 | -1.16 | -0.09 | 0.30  | -0.09 | -1.52 |
| Q6XE24 | RNA-binding motif, single-stranded-interacting protein 3             | RBMS3     | -0.73 | 1.02 | 1.21  | 0.46  | -1.06 | -0.95 | 1.53  | 0.36  | 0.52  | -1.36 | 0.16  | -0.84 |
| Q01650 | Large neutral amino acids transporter small subunit 1                | SLC7A5    | -0.73 | 1.10 | 0.70  | 1.50  | -1.80 | 0.24  | 0.62  | 0.52  | -0.90 | -1.20 | 0.07  | 0.25  |
| Q9NTU7 | Cerebellin-4                                                         | CBLN4     | -0.73 | 0.71 | -1.33 | -0.21 | 0.34  | 0.87  | 1.19  | -0.87 | -1.73 | 0.23  | 0.80  | 0.70  |
| Q6ZMQ8 | Serine/threonine-protein kinase LMTK1                                | AATK      | -0.73 | 2.30 | 2.58  | 0.62  | -0.48 | -0.23 | -0.30 | -0.27 | -0.26 | -1.11 | -0.47 | -0.08 |
| Q8N3J6 | Cell adhesion molecule 2                                             | CADM2     | -0.73 | 2.51 | -0.44 | 2.20  | -0.66 | 1.17  | 0.02  | -0.31 | -0.87 | -1.03 | -0.38 | 0.31  |
| P28332 | Alcohol dehydrogenase 6                                              | ADH6      | -0.73 | 2.08 | -0.02 | -0.33 | 2.77  | -0.15 | -0.21 | -0.41 | -0.36 | -0.87 | -0.25 | -0.18 |
| Q13243 | Serine/arginine-rich splicing factor 5                               | SRSF5     | -0.73 | 0.72 | 1.51  | -0.11 | -1.32 | 0.22  | 0.58  | 1.52  | -1.14 | -0.19 | -0.96 | -0.12 |
| Q00535 | Cyclin-dependent-like kinase 5                                       | CDK5      | -0.73 | 2.62 | 1.19  | 1.43  | -1.46 | 0.95  | 0.24  | -0.82 | -0.71 | -0.74 | 0.58  | -0.64 |
| Q9NQUS | Serine/threonine-protein kinase PAK 6                                | PAK6      | -0.73 | 1.78 | -0.05 | -0.17 | -0.47 | 2.76  | -0.22 | -0.23 | -0.24 | -0.94 | -0.22 | -0.22 |
| Q69YN2 | CWF19-like protein 1                                                 | CWF19L1   | -0.73 | 0.77 | 1.51  | 0.20  | -1.35 | 0.51  | 0.06  | 1.21  | -0.43 | -1.10 | 0.57  | -1.19 |
| O96013 | Serine/threonine-protein kinase PAK 4                                | PAK4      | -0.73 | 0.49 | -0.77 | 0.20  | 2.28  | -0.18 | -0.89 | 0.70  | 0.45  | -1.13 | -0.62 | -0.05 |
| Q2M1Z3 | Rho GTPase-activating protein 31                                     | ARHGAP31  | -0.73 | 1.78 | 0.06  | 2.74  | -0.50 | -0.20 | -0.25 | -0.30 | -0.11 | -0.96 | -0.33 | -0.16 |
| Q9Y4G8 | Rap guanine nucleotide exchange factor 2                             | RAPGEF2   | -0.73 | 1.65 | -0.85 | 0.07  | 0.04  | -0.14 | 2.60  | -0.95 | -0.06 | -0.72 | -0.18 | 0.18  |
| Q9UL54 | Serine/threonine-protein kinase TAO2                                 | TAO2      | -0.73 | 1.36 | 1.74  | -1.40 | 0.09  | 0.84  | 0.18  | 0.48  | 0.49  | -1.53 | -0.30 | -0.60 |
| Q13573 | SNW domain-containing protein 1                                      | SNW1      | -0.73 | 1.08 | -0.78 | 0.74  | 0.95  | 1.19  | -0.88 | -0.86 | -0.95 | -1.19 | 1.13  | 0.65  |
| Q13148 | TAR DNA-binding protein 43                                           | TARDBP    | -0.73 | 2.10 | 0.77  | -0.61 | -0.59 | 1.24  | 1.16  | -0.51 | -1.34 | -1.33 | 0.96  | 0.25  |
| P49902 | Cytosolic purine 5'-nucleotidase                                     | NTSC2     | -0.73 | 0.65 | -1.16 | -0.47 | 0.98  | 0.58  | 0.88  | -1.07 | -1.71 | 0.67  | 0.71  | 0.59  |
| Q8NF91 | Nesprin-1                                                            | SYNE1     | -0.73 | 0.57 | -1.19 | 0.82  | 0.61  | 0.87  | -0.38 | -0.98 | -1.74 | 0.26  | 0.68  | 1.06  |
| O43865 | S-adenosylhomocysteine hydrolase-like protein 1                      | AHCYL1    | -0.73 | 1.21 | -1.36 | -0.03 | 0.13  | 0.69  | 1.92  | -1.21 | -0.90 | -0.05 | 0.84  | -0.02 |
| P62805 | Histone H4                                                           | HIST1H4A  | -0.74 | 2.36 | 0.74  | 0.00  | 1.13  | 0.07  | 0.27  | 0.23  | -2.59 | -0.33 | 0.01  | 0.47  |
| Q9UIW2 | Plexin-A1                                                            | PLXNA1    | -0.74 | 0.95 | -1.25 | 1.66  | 0.55  | -0.14 | 0.29  | -1.09 | 0.95  | -1.44 | 0.25  | 0.22  |
| O75955 | Flotillin-1                                                          | FLOT1     | -0.74 | 0.92 | 0.76  | 0.90  | -1.73 | -0.10 | 1.24  | 0.53  | 0.72  | -1.23 | -0.29 | -0.82 |
| P10619 | Lysosomal protective protein                                         | CTSA      | -0.74 | 1.54 | 0.02  | -0.34 | -0.52 | -0.26 | 2.76  | -0.07 | -0.32 | -0.84 | -0.14 | -0.30 |
| O94822 | E3 ubiquitin-protein ligase listerin                                 | LTN1      | -0.74 | 0.62 | 1.14  | 0.36  | -0.92 | 0.13  | 0.08  | 0.89  | 1.09  | -2.13 | -0.33 | -0.30 |
| P19878 | Neutrophil cytosol factor 2                                          | NCF2      | -0.74 | 1.58 | -0.18 | 1.72  | -0.80 | 1.59  | -0.67 | -0.55 | -0.54 | -1.10 | 0.74  | -0.20 |
| Q7Z7G0 | Target of Nesh-SH3                                                   | ABI3BP    | -0.74 | 0.98 | 0.44  | -0.16 | -0.42 | 1.18  | 0.12  | 0.84  | -1.48 | -1.84 | 0.72  | 0.61  |
| O14979 | Heterogeneous nuclear ribonucleoprotein D-like                       | HNRNPDL   | -0.74 | 2.25 | 1.15  | -1.07 | 0.84  | 0.62  | 0.52  | -0.45 | -2.18 | -0.04 | 0.40  | 0.21  |
| Q13724 | Mannosyl-oligosaccharide glucosidase                                 | MOGS      | -0.74 | 0.92 | 1.18  | -0.50 | -0.69 | 1.69  | -0.60 | -0.53 | -0.58 | -0.84 | 1.42  | -0.55 |
| P61026 | Ras-related protein Rab-10                                           | RAB10     | -0.74 | 3.45 | -0.69 | 1.99  | 1.08  | 0.65  | -0.29 | -0.91 | -1.10 | -0.91 | 0.12  | 0.07  |
| Q5V266 | Janus kinase and microtubule-interacting protein 3                   | JAKMIP3   | -0.74 | 1.96 | 0.10  | 2.72  | -0.58 | -0.04 | -0.22 | -0.22 | -0.16 | -0.96 | -0.35 | -0.28 |
| Q9NX63 | MICOS complex subunit MIC19                                          | CHCHD3    | -0.74 | 0.48 | -0.59 | 1.29  | -0.37 | 1.38  | -1.10 | -0.66 | -0.91 | -0.88 | 0.99  | 0.84  |
| P53597 | Succinate--CoA ligase [ADP/GDP-forming] subunit alpha, mitochondrion | SUCLG1    | -0.74 | 2.37 | 2.23  | 0.39  | 0.55  | -0.54 | -0.47 | 0.84  | -0.63 | -1.01 | -0.82 | -0.53 |
| Q13434 | Putative E3 ubiquitin-protein ligase makorin-4                       | MKRN4P    | -0.74 | 1.36 | 0.06  | 2.79  | -0.57 | -0.32 | -0.43 | -0.34 | -0.23 | -0.62 | -0.16 | -0.18 |
| P17677 | Neuromodulin                                                         | GNAS1     | -0.74 | 1.26 | 0.16  | 0.95  | 0.66  | -1.30 | 0.90  | -0.48 | 0.81  | 0.62  | -1.93 | -0.40 |
| P08579 | U2 small nuclear ribonucleoprotein B"                                | SNRNPB    | -0.74 | 0.95 | -0.56 | -1.04 | 0.96  | 1.04  | 0.71  | -1.36 | -1.22 | -0.35 | 0.87  | 0.94  |
| O76094 | Signal recognition particle subunit SRP72                            | SRP72     | -0.74 | 0.78 | 0.65  | -0.26 | 0.82  | -0.63 | 0.38  | 0.21  | -0.43 | -1.82 | -0.71 | 1.80  |
| Q6Z5Z5 | Rho guanine nucleotide exchange factor 18                            | ARHGEF18  | -0.74 | 1.67 | 0.07  | 2.75  | -0.46 | -0.15 | -0.45 | -0.25 | -0.18 | -0.91 | -0.18 | -0.24 |
| O75410 | Transforming acidic coiled-coil-containing protein 1                 | TACC1     | -0.74 | 1.47 | -0.31 | 1.43  | 0.20  | 1.40  | -1.17 | -0.23 | -1.40 | -0.89 | 0.82  | 0.15  |
| P30531 | Sodium- and chloride-dependent GABA transporter 1                    | SLC6A1    | -0.74 | 0.88 | -0.26 | 2.57  | -0.51 | -0.33 | -0.42 | -0.46 | -0.36 | -0.68 | -0.43 | 0.88  |
| A7KAX9 | Rho GTPase-activating protein 32                                     | ARHGAP32  | -0.74 | 0.54 | 0.93  | -0.16 | 0.29  | 0.26  | -0.61 | 1.24  | -0.66 | -2.25 | 0.25  | 0.72  |
| O94992 | Protein HEXIM1                                                       | HEXIM1    | -0.75 | 1.62 | 2.78  | -0.31 | -0.48 | -0.10 | -0.17 | -0.16 | -0.30 | -0.83 | -0.34 | -0.09 |
| O95639 | Cleavage and polyadenylation specificity factor subunit 4            | CPSF4     | -0.75 | 1.52 | 2.76  | -0.21 | -0.63 | -0.09 | -0.19 | -0.11 | -0.34 | -0.82 | -0.13 | -0.25 |
| Q8WXF1 | Paraspeckle component 1                                              | PSPC1     | -0.75 | 2.16 | -0.42 | 0.41  | 0.87  | 0.61  | 0.62  | -1.49 | -1.97 | -0.08 | 0.78  | 0.67  |
| P61764 | Syntaxin-binding protein 1                                           | STXBP1    | -0.75 | 2.86 | -0.34 | 2.07  | 0.27  | 0.16  | 0.24  | -0.89 | 0.33  | -1.87 | -0.15 | 0.19  |
| Q99832 | T-complex protein 1 subunit eta                                      | CCT7      | -0.75 | 4.34 | 1.24  | 0.36  | 1.34  | 0.55  | -0.49 | -0.80 | -1.84 | -0.41 | 0.64  | -0.61 |
| A4D161 | Protein FAM221A                                                      | FAM221A   | -0.75 | 1.34 | 2.81  | -0.23 | -0.58 | -0.29 | -0.21 | -0.23 | -0.15 | -0.61 | -0.29 | -0.22 |
| Q8N3P4 | Vacuolar protein sorting-associated protein 8 homolog                | VPS8      | -0.75 | 2.08 | 1.58  | -0.04 | -1.21 | 0.94  | 0.69  | -0.31 | -1.20 | -0.91 | 1.01  | -0.55 |
| O60315 | Zinc finger E-box-binding homeobox 2                                 | ZEB2      | -0.75 | 0.81 | 1.40  | -1.22 | -0.11 | 0.05  | 0.84  | 0.95  | -1.58 | -0.97 | 0.72  | -0.10 |
| Q9UPT6 | C-Jun-amino-terminal kinase-interacting protein 3                    | MAPK8IP3  | -0.75 | 2.63 | 0.11  | 1.68  | 0.29  | 0.37  | -0.15 | -1.63 | 0.55  | -1.45 | -0.52 | 0.76  |
| Q8WUJ2 | Peptidyl-prolyl cis-trans isomerase-like 4                           | PP1L4     | -0.75 | 0.74 | 0.13  | 0.91  | -2.00 | 1.08  | 0.79  | -0.11 | -0.65 | -0.62 | 1.08  | -0.60 |
| Q6W3E5 | Glycerophosphodiester phosphodiesterase domain-containing protein 1  | GDPD4     | -0.75 | 0.54 | -1.00 | 0.27  | 1.40  | 1.18  | -1.16 | -1.04 | -1.09 | 0.01  | 0.71  | 0.71  |
| P35222 | Catenin beta-1                                                       | CTNNB1    | -0.75 | 2.69 | 0.06  | 1.11  | 0.96  | 0.75  | -0.55 | 0.05  | -0.59 | -2.26 | 0.66  | -0.19 |
| Q16653 | Myelin-oligodendrocyte glycoprotein                                  | MOG       | -0.75 | 0.80 | -0.08 | -0.30 | 1.54  | -0.01 | -0.18 | -0.29 | -2.04 | 1.47  | 0.16  | -0.26 |
| Q6UXB8 | Peptidase inhibitor 16                                               | PI16      | -0.75 | 2.88 | 0.06  | 0.92  | 2.40  | -0.30 | -0.55 | -0.23 | -0.47 | -1.19 | -0.53 | -0.11 |
| O94964 | Protein SOGA1                                                        | SOGA1     | -0.75 | 1.03 | 0.67  | -0.92 | 0.78  | -0.76 | 1.41  | -0.80 | -0.73 | -1.24 | 1.32  | 0.28  |
| O60524 | Nuclear export mediator factor NEMF                                  | NEMF      | -0.75 | 1.27 | -0.48 | 1.34  | -0.50 | 1.27  | -0.25 | -1.44 | -1.44 | 0.20  | 0.74  | 0.56  |
| Q9H082 | Ras-related protein Rab-33B                                          | RAB33B    | -0.75 | 2.79 | -0.43 | 2.02  | -0.09 | 1.05  | -0.18 | -1.10 | -0.18 | 0.10  | 0.32  | -1.49 |
| Q14183 | Double C2-like domain-containing protein alpha                       | DOC2A     | -0.75 | 1.54 | -0.15 | -0.48 | 0.29  | 0.68  | 1.28  | -1.24 | -1.40 | 1.26  | 0.73  | -0.97 |
| O95396 | Adenylyltransferase and sulfuryltransferase MOC53                    | MOC53     | -0.75 | 0.91 | 0.35  | 0.41  | -1.45 | 1.07  | 0.69  | 0.24  | -1.98 | -0.51 | 0.80  | 0.38  |
| Q9H124 | WD repeat-containing protein 13                                      | WDR13     | -0.75 | 3.81 | 0.23  | 1.41  | -0.55 | 1.13  | 0.59  | -1.73 | 0.11  | -1.18 | 0.54  | -0.56 |
| Q9UDY4 | DnaJ homolog subfamily B member 4                                    | DNAJB4    | -0.75 | 0.79 | 0.15  | 0.82  | -0.03 | 0.25  | -0.21 | 0.27  | 1.27  | -2.55 | 0.03  | 0.02  |
| P62068 | Ubiquitin carboxyl-terminal hydrolase 46                             | USP46     | -0.75 | 2.60 | -0.49 | 0.84  | 0.27  | 2.10  | -0.44 | -0.77 | -0.81 | -1.37 | 0.37  | 0.31  |
| Q99996 | A-kinase anchor protein 9                                            | AKAP9     | -0.76 | 0.48 | -1.19 | 1.42  | -0.26 | 0.50  | 0.16  | -2.00 | 0.09  | 1.07  | 0.27  | -0.05 |
| P06748 | Nucleophosmin                                                        | NPM1      | -0.76 | 1.69 | 0.38  | -1.59 | 0.38  | 1.04  | 1.49  | -0.34 | -1.58 | -0.09 | 0.47  | -0.17 |
| P00403 | Cytochrome c oxidase subunit 2                                       | MT-CO2    | -0.76 | 0.97 | 0.34  | 0.50  | 0.32  | 0.08  | -0.08 | 0.69  | -2.47 | -0.85 | 0.45  | 1.01  |
| Q5VZM2 | Ras-related GTP-binding protein B                                    | RRAGB     | -0.76 | 1.01 | 1.06  | 1.00  | -1.04 | 1.02  | -0.89 | -0.76 | -0.78 | -1.20 | 1.01  | 0.56  |
| Q9H0R8 | Gamma-aminobutyric acid receptor-associated protein-like 1           | GABARAPL1 | -0.76 | 2.78 | 0.42  | 2.17  | -0.19 | 0.25  | -0.30 | -1.22 | 0.85  | -0.77 | -0.16 | -1.05 |
| Q6P1L5 | Protein FAM117B                                                      | FAM117B   | -0.76 | 1.55 | 0.01  | 2.79  | -0.49 | -0.21 | -0.42 | -0.32 | -0.34 | -0.67 | -0.16 | -0.18 |
| Q8TCY9 | Up-regulator of cell proliferation                                   | URGCP     | -0.76 | 1.52 | 1.18  | -0.75 | -0.86 | 1.64  | 0.36  | -0.64 | -0.60 | -1.12 | 1.14  | -0.37 |
| Q08174 | Protocadherin-1                                                      | PCDH1     | -0.76 | 1.45 | -0.03 | 2.79  | -0.51 | -0.23 | -0.42 | -0.25 | -0.16 | -0.70 | -0.32 | -0.17 |
| Q86UA1 | Pre-mRNA-processing factor 39                                        | PRPF39    | -0.76 | 1.98 | 0.45  | 1.39  | -0.70 | 0.59  | 0.18  | -0.99 | -0.44 | -1.90 | 0.42  | 1.00  |
| Q9HBL0 | Tensin-1                                                             | TNS1      | -0.76 | 1.00 | 0.87  | 0.56  | -0.61 | 0.60  | -0.24 | 0.62  | 0.57  | -2.53 | 0.01  | 0.16  |
| Q8NEZ5 | F-box only protein 22                                                | FBXO22    | -0.76 | 1.00 | 0.35  | -0.35 | 0.73  | 1.58  | -1.16 | 0.04  | -1.12 | 1.33  | -0.28 | -1.13 |
| O43251 | RNA binding protein fox-1 homolog 2                                  | RBFox2    | -0.76 | 1.25 | 2.07  | -0.59 | -0.80 | -0.19 | 0.88  | 0.97  | -0.40 | -0.18 | -0.54 | -1.22 |
| Q9BVM4 | Gamma-glutamylaminocyclotransferase                                  | GGACT     | -0.76 | 0.89 | -0.82 | 0.46  | 1.03  | 0.08  | 0.31  | -1.09 | -1.03 | -1.33 | 0.95  | 1.44  |
| N11274 | Breakpoint cluster region protein                                    | BCR       | -0.76 | 3.29 | 0.55  | 0.82  | -0.61 | 1.53  | 0.32  | -0.08 | -0.57 | -1.98 | 0.70  | -0.68 |
| Q99726 | Zinc transporter 3                                                   | SLC30A3   | -0.77 | 1.27 | 1.53  | 1.70  | -0.77 | -0.53 | -0.54 | -0.45 | -0.53 | -0.97 | 0.98  | -0.42 |
| Q5TBA9 | Protein furry homolog                                                | FRY       | -0.77 | 1.39 | 0.88  | 0.05  | -1.29 | 1.25  | 0.59  | -1.00 | -0.99 | 1.00  | 0.63  | -1.12 |

|        |                                                                         |           |       |      |       |       |       |       |       |       |       |       |       |       |
|--------|-------------------------------------------------------------------------|-----------|-------|------|-------|-------|-------|-------|-------|-------|-------|-------|-------|-------|
| Q8N2M8 | CLK4-associating serine/arginine rich protein                           | CLASRP    | -0.77 | 1.84 | 1.38  | 1.76  | -0.64 | -0.21 | -0.49 | -0.25 | 0.90  | -0.93 | -1.20 | -0.34 |
| Q11206 | CMP-N-acetylneuraminase-beta-galactosamide-alpha-2,3-sialyltran         | ST3GAL4   | -0.77 | 1.08 | 0.15  | 0.18  | 0.31  | 0.57  | 0.06  | 0.47  | 0.75  | -2.60 | 0.75  | -0.64 |
| Q96QH2 | PML-RARA-regulated adapter molecule 1                                   | PRAM1     | -0.77 | 0.65 | 1.11  | 0.49  | -0.53 | 0.24  | -0.50 | 1.76  | -1.23 | -1.51 | -0.06 | 0.21  |
| P37840 | Alpha-synuclein                                                         | SNCA      | -0.77 | 1.49 | 0.02  | 0.46  | -0.52 | -0.31 | 1.90  | -1.86 | 0.96  | 0.22  | -0.58 | -0.29 |
| O75177 | Calcium-responsive transactivator                                       | SS18L1    | -0.77 | 1.64 | -0.39 | -0.38 | -0.81 | 1.44  | 1.82  | -0.57 | -0.61 | -1.04 | 0.87  | -0.33 |
| Q8TDY2 | RB1-inducible coiled-coil protein 1                                     | RB1CC1    | -0.77 | 2.27 | 1.68  | 1.27  | -1.29 | 0.73  | -0.27 | -0.24 | -0.30 | -1.45 | 0.08  | -0.20 |
| O14994 | Synapsin-3                                                              | SYN3      | -0.77 | 1.67 | 1.06  | 1.50  | -0.68 | 0.31  | -0.50 | -0.22 | 1.24  | -1.61 | -0.36 | -0.74 |
| P05388 | 60S acidic ribosomal protein P0                                         | RPLP0     | -0.77 | 1.46 | -0.50 | 0.46  | -0.29 | 0.76  | 1.13  | -0.86 | -2.14 | 1.04  | 0.47  | -0.06 |
| Q96QD9 | UAP56-interacting factor                                                | FYTTD1    | -0.77 | 1.26 | 0.61  | 0.50  | -1.41 | 0.83  | 0.83  | -0.37 | -2.06 | -0.06 | 0.64  | 0.48  |
| Q13459 | Unconventional myosin-IXb                                               | MYO9B     | -0.77 | 0.66 | -1.21 | 0.60  | 0.66  | 0.74  | 0.03  | -1.53 | -1.45 | 0.47  | 0.58  | 1.11  |
| P06681 | Complement C2                                                           | C2        | -0.77 | 0.77 | -0.93 | 0.37  | 1.16  | 0.89  | -0.55 | -0.85 | -1.85 | 0.23  | 1.06  | 0.48  |
| Q9NRG4 | N-lysine methyltransferase SMYD2                                        | SMYD2     | -0.77 | 1.51 | 2.43  | -0.61 | -0.73 | 0.35  | 0.16  | 0.57  | -0.59 | -1.08 | -0.10 | -0.41 |
| P20336 | Ras-related protein Rab-3A                                              | RAB3A     | -0.77 | 2.72 | -0.55 | 0.95  | 0.94  | 0.63  | 0.40  | -2.47 | -0.17 | -0.25 | 0.32  | 0.20  |
| Q15773 | Myeloid leukemia factor 2                                               | MLF2      | -0.77 | 2.55 | 1.28  | 1.00  | -0.72 | 0.42  | 0.28  | 0.27  | 0.35  | -2.28 | -0.40 | -0.18 |
| Q96CV9 | Optineurin                                                              | OPTN      | -0.77 | 2.37 | 0.66  | 1.92  | -1.23 | 0.82  | 0.00  | -0.52 | -0.74 | -1.29 | 0.45  | -0.07 |
| Q8TBB6 | Probable cationic amino acid transporter                                | SLC7A14   | -0.77 | 1.40 | -0.07 | 2.78  | -0.54 | -0.21 | -0.41 | -0.25 | -0.22 | -0.79 | -0.17 | -0.13 |
| Q99569 | Plakophilin-4                                                           | PKP4      | -0.78 | 1.68 | 1.12  | 1.07  | -0.55 | 0.80  | -0.74 | 0.42  | -0.22 | -1.68 | 0.90  | -1.12 |
| P23258 | Tubulin gamma-1 chain                                                   | TUBG1     | -0.78 | 0.91 | 0.88  | 0.69  | -0.05 | 0.81  | -1.27 | -0.10 | -1.24 | -1.52 | 0.92  | 0.87  |
| Q96GX2 | Ataxin-7-like protein 3B                                                | ATXN7L3B  | -0.78 | 1.51 | 2.82  | -0.22 | -0.46 | -0.28 | -0.21 | -0.13 | -0.30 | -0.65 | -0.28 | -0.30 |
| P19532 | Transcription factor E3                                                 | TFE3      | -0.78 | 1.65 | 0.40  | 0.83  | -1.61 | 0.93  | 1.13  | 1.06  | -0.45 | -0.29 | -0.98 | -1.02 |
| P08243 | Asparagine synthetase [glutamine-hydrolyzing]                           | ASNS      | -0.78 | 2.63 | 0.80  | 1.12  | -0.30 | 0.98  | -0.30 | 0.01  | -1.27 | -1.81 | 1.01  | -0.23 |
| P11277 | Spectrin beta chain, erythrocytic                                       | SPTB      | -0.78 | 0.98 | 0.49  | 0.03  | 1.48  | -0.12 | -0.74 | 0.16  | 0.96  | -2.04 | -0.77 | 0.55  |
| A6NL88 | Protein shisa-7                                                         | SHISA7    | -0.78 | 1.56 | 1.40  | 0.31  | 1.50  | -0.76 | -0.83 | 1.04  | -0.08 | -1.12 | -0.82 | -0.64 |
| Q16777 | Histone H2A type 2-C                                                    | HIST2H2AC | -0.78 | 1.06 | 0.49  | -0.38 | 1.30  | 0.66  | -0.88 | 0.21  | -2.21 | -0.04 | 0.86  | -0.03 |
| Q9H9B1 | Histone-lysine N-methyltransferase EHMT1                                | EHMT1     | -0.78 | 1.43 | 0.19  | 0.37  | -1.41 | 0.68  | 1.68  | -1.16 | 0.24  | -0.08 | 0.75  | -1.26 |
| O75688 | Protein phosphatase 1B                                                  | PPM1B     | -0.78 | 1.07 | -0.64 | 0.98  | 2.17  | -0.60 | -0.67 | -0.60 | -0.64 | -0.24 | -0.67 | 0.92  |
| Q8IXS8 | Protein FAM126B                                                         | FAM126B   | -0.78 | 0.96 | -0.26 | 2.65  | -0.45 | -0.39 | -0.41 | -0.37 | -0.41 | -0.71 | -0.34 | 0.68  |
| O00168 | Phospholemmann                                                          | FXDY1     | -0.78 | 1.60 | -0.07 | 2.80  | -0.44 | -0.16 | -0.41 | -0.28 | -0.19 | -0.69 | -0.36 | -0.21 |
| O00522 | Krev interaction trapped protein 1                                      | KRIT1     | -0.78 | 0.95 | 1.04  | -0.01 | -1.34 | 0.96  | 0.45  | 0.18  | -1.28 | -1.49 | 0.79  | 0.70  |
| Q9NXU5 | ADP-ribosylation factor-like protein 15                                 | ARL15     | -0.78 | 2.31 | -0.26 | 2.26  | 0.44  | 0.23  | -0.56 | -1.38 | 0.40  | -0.94 | 0.28  | -0.48 |
| Q9ULM3 | YEATS domain-containing protein 2                                       | YEATS2    | -0.78 | 0.59 | -1.05 | 0.56  | 1.56  | 0.78  | -1.09 | -1.12 | -1.06 | 0.32  | 0.91  | 0.20  |
| Q9H0W8 | Protein SMG9                                                            | SMG9      | -0.78 | 1.40 | 0.08  | -0.94 | 0.89  | 1.14  | 0.33  | -1.00 | -1.01 | -1.37 | 1.30  | 0.58  |
| Q9PIU1 | Actin-related protein 3B                                                | ACTR3B    | -0.78 | 1.62 | -0.40 | 1.30  | -0.36 | 0.90  | 0.23  | -2.24 | 0.57  | -0.17 | 0.72  | -0.54 |
| Q8N3C7 | CAP-Gly domain-containing linker protein 4                              | CLIP4     | -0.78 | 0.67 | -0.70 | -1.08 | 0.55  | 1.25  | 0.80  | -1.11 | -1.05 | -0.63 | 1.29  | 0.67  |
| Q96544 | EKC/KEOPS complex subunit TP53RK                                        | TP53RK    | -0.78 | 1.19 | 1.04  | -0.36 | -0.71 | 1.20  | 0.16  | 0.14  | -1.00 | -1.85 | 1.14  | 0.25  |
| O14880 | Microsomal glutathione S-transferase 3                                  | MGST3     | -0.78 | 0.79 | -1.49 | 0.81  | -0.09 | 1.04  | 0.68  | -1.09 | -1.53 | 0.32  | 0.81  | 0.53  |
| O43307 | Rho guanine nucleotide exchange factor 9                                | ARHGEF9   | -0.78 | 1.58 | -0.02 | -0.97 | 0.53  | 1.26  | 0.81  | -1.92 | -0.49 | -0.60 | 1.06  | 0.32  |
| Q96ME7 | Zinc finger protein 512                                                 | ZNF512    | -0.78 | 0.99 | 1.49  | -1.02 | -0.92 | 0.54  | 1.04  | 0.31  | -1.67 | 0.21  | 0.55  | -0.54 |
| Q9Y6T7 | Diacylglycerol kinase beta                                              | DGKB      | -0.78 | 1.87 | 0.00  | 0.44  | -0.25 | 0.93  | 0.76  | -2.47 | -0.59 | -0.14 | 0.69  | 0.62  |
| Q9H0L4 | Cleavage stimulation factor subunit 2 tau variant                       | CSTF2T    | -0.78 | 1.41 | -0.64 | 0.84  | -1.05 | 0.86  | 1.48  | -0.81 | -0.78 | -1.28 | 0.63  | 0.75  |
| Q52LJ0 | Protein FAM98B                                                          | FAM98B    | -0.78 | 0.45 | -1.25 | 0.33  | 0.65  | 0.85  | 0.02  | -1.56 | -1.38 | 0.65  | 0.91  | 0.78  |
| Q9H009 | Nascent polypeptide-associated complex subunit alpha-2                  | NACA2     | -0.78 | 3.72 | 1.05  | 1.01  | 0.67  | 0.45  | -0.32 | -1.07 | 0.01  | -1.57 | -1.23 | 1.00  |
| Q9UPR5 | Sodium/calcium exchanger 2                                              | SLC8A2    | -0.78 | 1.29 | -0.38 | 1.49  | 0.46  | 0.12  | -0.28 | -1.91 | -0.47 | 1.49  | 0.00  | -0.52 |
| Q8IX01 | SURP and G-patch domain-containing protein 2                            | SUGP2     | -0.78 | 0.68 | 1.07  | -0.72 | -0.88 | 0.43  | 0.95  | 0.58  | 0.86  | -1.99 | 0.31  | -0.61 |
| Q7Z794 | Keratin, type II cytoskeletal 1b                                        | KRT72     | -0.79 | 2.29 | 0.38  | -0.97 | 1.04  | -0.09 | 1.71  | -1.87 | -0.20 | -0.28 | 0.48  | -0.21 |
| Q96BY6 | Dedicator of cytokinesis protein 10                                     | DOCK10    | -0.79 | 0.97 | 0.87  | 0.58  | -0.64 | 0.50  | -0.17 | -1.10 | 1.64  | -1.33 | 0.68  | -1.03 |
| Q00653 | Nuclear factor NF-kappa-B p100 subunit                                  | NFKB2     | -0.79 | 1.17 | -0.58 | 1.42  | -1.04 | 1.03  | 0.47  | -0.82 | -0.86 | -1.22 | 1.05  | 0.54  |
| Q9C0H5 | Rho GTPase-activating protein 39                                        | ARHGAP39  | -0.79 | 1.01 | -0.59 | 0.89  | -0.04 | 0.49  | 0.44  | -1.76 | 1.54  | -1.28 | 0.53  | -0.21 |
| Q9H0Q3 | FXDY domain-containing ion transport regulator 6                        | FXDY6     | -0.79 | 1.67 | 0.00  | 2.77  | -0.46 | -0.17 | -0.37 | -0.12 | -0.25 | -0.83 | -0.35 | -0.21 |
| Q9BYJ9 | YTH domain-containing family protein 1                                  | YTHDF1    | -0.79 | 1.40 | 1.36  | -1.17 | -0.69 | 1.79  | 1.21  | 0.38  | 0.07  | -1.61 | 0.32  | -0.65 |
| Q92905 | COP9 signalosome complex subunit 5                                      | COPS5     | -0.79 | 2.92 | 0.71  | -0.46 | 0.63  | 1.60  | -0.05 | -0.61 | 0.44  | -0.82 | 0.52  | -1.96 |
| Q9H0B6 | Kinesin light chain 2                                                   | KLC2      | -0.79 | 1.45 | 0.77  | 1.14  | -1.52 | 0.00  | 1.12  | 0.18  | -1.58 | 0.62  | 0.03  | -0.78 |
| Q9UKE5 | TRAF2 and NCK-interacting protein kinase                                | TNIK      | -0.79 | 2.33 | 0.69  | 0.92  | -0.65 | 1.03  | 0.15  | 0.01  | -0.01 | -2.39 | 0.59  | -0.34 |
| O60518 | Ran-binding protein 6                                                   | RANBP6    | -0.79 | 0.86 | -1.35 | 0.89  | -0.35 | 0.88  | 0.96  | 0.46  | -1.46 | -1.21 | 0.70  | 0.50  |
| P10915 | Hyaluronan and proteoglycan link protein 1                              | HAPLN1    | -0.79 | 0.96 | -0.02 | -0.79 | 0.29  | -0.12 | 1.75  | -0.90 | -1.48 | 1.48  | -0.09 | -0.13 |
| O43566 | Regulator of G-protein signaling 14                                     | RGS14     | -0.79 | 1.25 | -0.04 | 1.64  | -1.69 | 0.95  | 0.53  | 0.13  | -1.04 | -0.79 | 0.67  | -0.36 |
| Q9H2U2 | Inorganic pyrophosphatase 2, mitochondrial                              | PPA2      | -0.79 | 0.71 | -1.45 | 0.47  | 0.24  | 0.64  | 0.98  | -0.99 | -1.69 | 1.00  | 0.61  | 0.20  |
| P27448 | MAP/microtubule affinity-regulating kinase 3                            | MARK3     | -0.79 | 2.02 | -0.49 | 2.54  | -0.21 | 0.44  | -0.30 | -1.10 | 0.11  | -0.80 | 0.15  | -0.33 |
| O95425 | Supervillin                                                             | SVIL      | -0.79 | 1.07 | -0.65 | 1.39  | 0.30  | 1.11  | -0.94 | 1.02  | -0.93 | -1.13 | -0.88 | 0.70  |
| P31942 | Heterogeneous nuclear ribonucleoprotein H3                              | HNRNPH3   | -0.79 | 1.65 | 1.55  | -0.24 | -1.20 | 0.59  | 0.97  | 0.24  | -1.13 | -1.49 | 0.27  | 0.43  |
| P19525 | Interferon-induced, double-stranded RNA-activated protein kinase        | EIF2AK2   | -0.80 | 1.38 | 1.23  | -0.63 | -0.92 | 0.61  | 1.18  | 0.38  | -0.52 | -1.96 | 0.40  | 0.24  |
| O14924 | Regulator of G-protein signaling 12                                     | RGS12     | -0.80 | 1.02 | -0.10 | 0.49  | -0.85 | 0.40  | 1.24  | -1.61 | -0.52 | -1.11 | 1.28  | 0.78  |
| O43920 | NADH dehydrogenase [ubiquinone] iron-sulfur protein 5                   | NDUFS5    | -0.80 | 1.05 | -0.08 | -0.91 | 0.88  | -0.36 | 1.66  | -1.41 | -1.01 | 0.30  | -0.23 | 1.16  |
| Q15427 | Splicing factor 3B subunit 4                                            | SF3B4     | -0.80 | 1.29 | -0.36 | -0.66 | 0.86  | -0.61 | 2.18  | -0.60 | -0.64 | 1.04  | -0.64 | -0.58 |
| P57087 | Junctional adhesion molecule B                                          | JAM2      | -0.80 | 1.09 | -0.59 | 0.56  | 0.92  | -0.26 | 0.62  | 0.53  | -1.87 | 0.24  | -1.34 | 1.19  |
| Q9P260 | RAB11-binding protein RELCH                                             | RELCH     | -0.80 | 0.73 | -1.17 | 1.22  | -0.16 | 0.89  | 0.11  | -1.25 | 1.03  | -1.49 | 0.66  | 0.16  |
| O43148 | mRNA cap guanine-N7 methyltransferase                                   | RNMT      | -0.80 | 0.92 | -0.73 | -1.13 | 0.93  | 1.21  | 0.79  | -1.17 | -1.39 | 0.24  | 0.46  | 0.46  |
| Q13542 | Eukaryotic translation initiation factor 4E-binding protein 2           | EIF4EBP2  | -0.80 | 0.77 | -0.75 | -0.87 | 0.75  | 0.95  | 0.85  | -0.89 | -0.97 | -1.20 | 0.91  | 1.22  |
| P04114 | Apolipoprotein B-100                                                    | APOB      | -0.80 | 0.40 | -1.59 | 0.61  | 0.50  | 0.71  | 0.31  | -0.83 | -1.75 | 0.48  | 0.75  | 0.83  |
| P49411 | Blongation factor Tu, mitochondrial                                     | TUFM      | -0.80 | 2.35 | 0.11  | -0.10 | 2.44  | -0.36 | 0.06  | -0.95 | 0.56  | -1.20 | -0.08 | -0.47 |
| Q9UQB8 | Brain-specific angiogenesis inhibitor 1-associated protein 2            | BAIAP2    | -0.80 | 1.78 | 1.47  | 0.45  | -0.29 | -0.31 | 0.47  | 0.62  | 0.78  | -2.17 | -0.41 | -0.60 |
| Q13136 | Liprin-alpha-1                                                          | PPFIA1    | -0.80 | 0.89 | -0.71 | 1.63  | -0.92 | 0.49  | 0.55  | -0.54 | -1.36 | -0.81 | 1.21  | 0.45  |
| O00401 | Neural Wiskott-Aldrich syndrome protein                                 | WASL      | -0.80 | 1.27 | -0.76 | 1.29  | -0.52 | 1.13  | 0.24  | -0.24 | 0.56  | -1.92 | 0.84  | -0.63 |
| P08294 | Extracellular superoxide dismutase [Cu-Zn]                              | SOD3      | -0.80 | 1.22 | 0.86  | 0.25  | 0.97  | -1.04 | 0.31  | -0.96 | 0.22  | 1.24  | -1.89 | 0.03  |
| O15085 | Rho guanine nucleotide exchange factor 11                               | ARHGEF11  | -0.80 | 1.88 | -0.20 | 1.35  | -0.11 | 0.57  | 0.26  | -0.86 | 0.45  | -2.30 | 0.14  | 0.70  |
| Q96J33 | Engulfment and cell motility protein 2                                  | ELMO2     | -0.80 | 1.14 | -1.54 | 1.62  | 0.33  | 0.67  | 0.20  | -1.06 | -1.22 | -0.22 | 0.54  | 0.67  |
| Q15843 | NEDD8                                                                   | NEDD8     | -0.80 | 1.30 | -0.91 | 1.44  | 0.22  | -0.22 | 0.88  | -1.69 | -0.07 | 1.33  | -0.26 | 0.73  |
| P20337 | Ras-related protein Rab-3B                                              | RAB3B     | -0.80 | 0.79 | 0.63  | 1.56  | -0.90 | 0.45  | -0.79 | 0.00  | 0.94  | -1.81 | 0.41  | -0.48 |
| P07910 | Heterogeneous nuclear ribonucleoproteins C1/C2                          | HNRNPC    | -0.80 | 2.00 | -0.58 | 1.37  | 0.34  | 0.60  | 0.21  | -0.36 | -2.37 | -0.18 | 0.60  | 0.37  |
| Q8WVY7 | Ubiquitin-like domain-containing CTD phosphatase 1                      | UBLCP1    | -0.80 | 0.99 | 1.43  | 0.65  | -1.27 | 0.14  | 0.19  | 0.83  | -0.18 | -1.46 | 0.83  | -1.15 |
| P62760 | Visinin-like protein 1                                                  | VSNL1     | -0.81 | 0.87 | -1.34 | -0.35 | 0.46  | 0.03  | 2.25  | -0.95 | -0.76 | 0.53  | 0.09  | 0.05  |
| P07199 | Major centromere autoantigen B                                          | CENPB     | -0.81 | 1.69 | -0.14 | -0.25 | -0.37 | 2.79  | -0.24 | -0.14 | -0.26 | -0.85 | -0.32 | -0.22 |
| Q7Z6J2 | General receptor for phosphoinositides 1-associated scaffold prot GRASP |           | -0.81 | 1.57 | 2.81  | -0.19 | -0.48 | -0.21 | -0.23 | -0.25 | -0.21 | -0.67 | -0.29 | -0.29 |

|        |                                                                  |          |       |      |       |       |       |       |       |       |       |       |       |       |
|--------|------------------------------------------------------------------|----------|-------|------|-------|-------|-------|-------|-------|-------|-------|-------|-------|-------|
| P19387 | DNA-directed RNA polymerase II subunit RPB3                      | POLR2C   | -0.81 | 1.95 | 0.29  | 0.84  | -0.85 | 0.27  | 1.33  | 0.15  | -1.89 | -1.19 | 0.72  | 0.33  |
| P08574 | Cytochrome c1, heme protein, mitochondrial                       | CYC1     | -0.81 | 1.68 | -0.45 | 0.55  | -0.97 | 1.53  | 1.03  | -0.58 | -0.64 | -1.11 | 1.30  | -0.66 |
| P0D319 | Serum amyloid A-2 protein                                        | SAA2     | -0.81 | 1.15 | -0.28 | 2.59  | 0.16  | -0.55 | -0.59 | -0.50 | 0.34  | -0.90 | -0.54 | 0.28  |
| Q9BRP8 | Partner of Y14 and mago                                          | PYM1     | -0.81 | 1.25 | 2.05  | 0.53  | 0.66  | -0.82 | -1.04 | -0.32 | 0.52  | -0.78 | -1.12 | 0.31  |
| P25054 | Adenomatous polyposis coli protein                               | APC      | -0.81 | 0.72 | 1.15  | 1.52  | -0.39 | -0.12 | -1.29 | 0.23  | 0.83  | -1.66 | -0.15 | -0.11 |
| O00429 | Dynamin-1-like protein                                           | DNM1L    | -0.81 | 1.01 | 0.41  | 0.61  | 0.24  | -0.13 | 0.06  | 0.67  | 1.01  | -2.62 | -0.04 | -0.21 |
| Q9BY44 | Eukaryotic translation initiation factor 2A                      | EIF2A    | -0.81 | 1.76 | 0.73  | 0.07  | -0.76 | 1.06  | 0.68  | -0.91 | -1.10 | -1.60 | 1.04  | 0.80  |
| Q9Y618 | Nuclear receptor corepressor 2                                   | NCOR2    | -0.81 | 0.70 | 0.46  | 0.56  | 0.33  | 0.05  | -0.53 | -0.91 | -1.04 | -1.12 | -0.02 | 2.21  |
| P44226 | Signal transducer and activator of transcription 6               | STAT6    | -0.81 | 1.04 | 1.44  | -0.06 | -1.01 | 0.61  | 0.21  | 1.17  | -1.57 | -1.25 | 0.30  | 0.16  |
| Q7L099 | Protein RUFY3                                                    | RUFY3    | -0.82 | 3.59 | 0.46  | 2.14  | -0.28 | 0.79  | -0.35 | -0.73 | -0.56 | -1.54 | 0.33  | -0.27 |
| O95208 | Epsin-2                                                          | EPN2     | -0.82 | 1.13 | -0.74 | 1.02  | -0.92 | 0.55  | 1.36  | -1.03 | -1.03 | -0.90 | 1.02  | 0.67  |
| Q6PFW1 | Inositol hexakisphosphate and diphosphoinositol-pentakisphosphat | PP1PSK1  | -0.82 | 1.47 | 0.78  | 0.83  | -0.14 | 0.96  | -0.87 | -0.15 | -0.49 | -2.19 | 0.88  | 0.40  |
| Q9BZ72 | Membrane-associated phosphatidylinositol transfer protein 2      | PITPNM2  | -0.82 | 0.76 | 1.18  | 0.09  | -0.91 | 0.46  | 0.11  | 1.08  | 0.67  | -2.13 | 0.07  | -0.63 |
| O95294 | RasGAP-activating-like protein 1                                 | RASAL1   | -0.82 | 2.09 | 1.38  | -0.32 | -0.12 | 1.21  | -0.17 | -0.88 | 0.48  | -1.51 | 1.02  | -1.08 |
| Q6PH85 | DCN1-like protein 2                                              | DCUN1D2  | -0.82 | 1.16 | -0.34 | 1.16  | -0.70 | 1.80  | -0.62 | -0.57 | -0.57 | -0.93 | 1.28  | -0.50 |
| O14617 | AP-3 complex subunit delta-1                                     | AP3D1    | -0.82 | 3.62 | -0.33 | 1.65  | 1.35  | 0.11  | -0.03 | -1.49 | -0.51 | 0.60  | -0.11 | -1.23 |
| P45880 | Voltage-dependent anion-selective channel protein 2              | VDAC2    | -0.82 | 2.47 | 1.23  | 1.09  | -0.97 | 0.44  | 0.40  | 0.49  | -0.09 | -2.07 | -0.68 | 0.16  |
| Q8TF44 | C2 calcium-dependent domain-containing protein 4C                | C2CD4C   | -0.82 | 0.73 | 0.58  | 1.00  | -2.05 | 0.85  | 0.53  | -1.08 | 0.47  | -0.02 | 0.59  | -0.87 |
| Q13613 | Myotubularin-related protein 1                                   | MTMR1    | -0.82 | 1.04 | 1.06  | 1.21  | -0.53 | -0.09 | -0.46 | 0.95  | 0.62  | -2.10 | -0.42 | -0.25 |
| P29466 | Caspase-1                                                        | CASP1    | -0.82 | 1.05 | -1.50 | 0.07  | 1.45  | 0.28  | 0.89  | -0.91 | -1.52 | 0.67  | 0.28  | 0.29  |
| Q8WZA9 | Immunity-related GTPase family Q protein                         | IRGQ     | -0.82 | 1.90 | -0.78 | 1.04  | 1.06  | -0.44 | 0.95  | -2.11 | 0.09  | 0.68  | -0.38 | -0.13 |
| P49815 | Tuberin                                                          | TSC2     | -0.82 | 1.14 | 0.74  | 1.34  | -1.07 | 0.50  | -0.24 | 0.72  | 0.56  | -1.76 | 0.29  | -1.09 |
| Q9BV19 | Uncharacterized protein C1orf50                                  | C1orf50  | -0.82 | 0.72 | 0.67  | -0.84 | 0.64  | -0.88 | 1.29  | 0.90  | 1.13  | -1.16 | -0.92 | -0.84 |
| P30837 | Aldehyde dehydrogenase X, mitochondrial                          | ALDH1B1  | -0.82 | 1.76 | -0.02 | -0.20 | 2.78  | -0.31 | -0.40 | -0.28 | -0.19 | -0.85 | -0.33 | -0.18 |
| Q9Y2Y9 | Kruppel-like factor 13                                           | KLF13    | -0.83 | 1.86 | -0.07 | -0.18 | -0.45 | -0.16 | 2.76  | -0.34 | -0.21 | -0.90 | -0.37 | -0.09 |
| Q13263 | Transcription intermediary factor 1-beta                         | TRIM28   | -0.83 | 1.75 | 1.72  | -0.24 | -0.78 | 0.75  | 0.29  | 0.18  | -1.93 | -0.50 | 0.80  | -0.29 |
| Q8N732 | APC membrane recruitment protein 2                               | AMER2    | -0.83 | 2.00 | 1.20  | 0.07  | 1.67  | 0.02  | -1.05 | -1.02 | -1.54 | 0.21  | 0.02  | 0.42  |
| P08247 | Synaptophysin                                                    | SNP      | -0.83 | 0.56 | 0.40  | 1.50  | -2.06 | 0.54  | 0.34  | -0.45 | 0.64  | -1.10 | 0.30  | -0.10 |
| Q9Y5A7 | NEDD8 ultimate buster 1                                          | NUB1     | -0.83 | 2.19 | -0.50 | 0.29  | 0.12  | 1.30  | 0.84  | -1.31 | -0.71 | -0.57 | 1.02  | 0.50  |
| P17600 | Synapsin-1                                                       | SYN1     | -0.83 | 2.42 | 0.50  | 1.55  | -0.27 | 0.29  | 0.13  | -1.60 | 1.20  | -1.37 | 0.10  | -0.53 |
| P16949 | Stathmin                                                         | STMN1    | -0.83 | 0.79 | -0.26 | 0.45  | -0.11 | -0.67 | 1.55  | -1.03 | -0.29 | 1.88  | -0.60 | -0.91 |
| O15079 | Syntaxin-1                                                       | SNPH     | -0.83 | 1.58 | 0.49  | 0.02  | 0.88  | 0.69  | -0.40 | 0.63  | -0.34 | -2.54 | -0.02 | 0.61  |
| Q16850 | Lanosterol 14-alpha demethylase                                  | CYP51A1  | -0.83 | 1.13 | 0.85  | 0.59  | -1.68 | 1.13  | 0.37  | -0.29 | 0.20  | -1.80 | 0.05  | 0.58  |
| Q9H1V8 | Sodium-dependent neutral amino acid transporter SLC6A17          | SLC6A17  | -0.83 | 1.92 | -0.18 | 2.69  | -0.65 | -0.36 | 0.46  | -0.38 | -0.52 | -0.04 | -0.50 | -0.53 |
| O60256 | Phosphoribosyl pyrophosphate synthase-associated protein 2       | PRPSAP2  | -0.83 | 1.96 | -1.26 | 1.73  | 0.17  | 1.07  | 0.19  | -0.90 | -1.20 | -0.52 | 0.83  | -0.10 |
| P09012 | U1 small nuclear ribonucleoprotein A                             | SNRPA    | -0.83 | 2.99 | -0.41 | 0.02  | 1.27  | 0.51  | 1.09  | -1.52 | -1.74 | 0.38  | 0.54  | -0.14 |
| Q86WR0 | Coiled-coil domain-containing protein 25                         | CCDC25C  | -0.83 | 0.55 | -1.39 | 0.23  | 0.86  | 0.50  | 0.50  | -1.31 | -1.55 | 0.97  | 0.60  | 0.60  |
| Q8NSH7 | SH2 domain-containing protein 3C                                 | SH2D3C   | -0.83 | 0.95 | 0.62  | 0.87  | -1.41 | 0.61  | 0.42  | 0.49  | 0.28  | -1.58 | 0.96  | -1.26 |
| Q15109 | Advanced glycosylation end product-specific receptor             | AGER     | -0.83 | 0.44 | 0.39  | 0.78  | 1.50  | -1.05 | -1.05 | 0.34  | 0.44  | -1.23 | -1.05 | 0.92  |
| Q96KR7 | Phosphatase and actin regulator 3                                | PHACTR3  | -0.84 | 2.33 | 0.66  | 0.01  | -0.60 | -0.39 | 2.55  | -0.29 | -0.47 | -1.03 | -0.45 | 0.01  |
| P35612 | Beta-adducin                                                     | ADD2     | -0.84 | 4.00 | 0.65  | 2.32  | 0.24  | -0.09 | -0.16 | -1.06 | -1.25 | -0.51 | 0.22  | -0.35 |
| Q9Y2H0 | Disks large-associated protein 4                                 | DLGAP4   | -0.84 | 0.88 | 0.91  | 0.50  | -1.48 | 1.00  | 0.12  | -1.31 | -1.32 | 0.13  | 1.03  | 0.44  |
| P43378 | Tyrosine-protein phosphatase non-receptor type 9                 | PTPN9    | -0.84 | 1.09 | -0.23 | 0.98  | -0.36 | 0.47  | 0.39  | -2.08 | -0.18 | -0.84 | 0.33  | 1.51  |
| Q9H1E3 | Nuclear ubiquitin casein and cyclin-dependent kinase substrate   | NUCKS1   | -0.84 | 0.92 | 0.69  | 1.04  | 1.45  | -1.30 | -0.80 | -0.59 | 0.23  | 0.00  | -1.44 | 0.72  |
| Q76070 | Gamma-synuclein                                                  | SNCG     | -0.84 | 1.05 | 0.91  | 0.39  | 0.51  | -1.71 | 1.10  | 0.36  | 0.74  | 0.12  | -1.27 | -1.15 |
| P11137 | Microtubule-associated protein 2                                 | MAP2     | -0.84 | 1.24 | 0.96  | -0.18 | -0.76 | 0.84  | 0.50  | -0.69 | 1.42  | -1.77 | 0.48  | -0.80 |
| P84085 | ADP-ribosylation factor 5                                        | ARF5     | -0.84 | 2.36 | -0.73 | 1.39  | 0.35  | 0.56  | 0.57  | -2.04 | -1.02 | -0.13 | 0.52  | 0.53  |
| Q9UFC0 | Leucine-rich repeat and WD repeat-containing protein 1           | LRWD1    | -0.84 | 1.39 | 1.74  | -0.66 | -0.92 | -0.26 | 1.61  | -0.35 | -0.59 | -1.02 | -0.22 | 0.68  |
| S5VVQ6 | Ubiquitin thioesterase OTU1                                      | YOD1     | -0.84 | 1.74 | 0.28  | 0.85  | 0.93  | 0.57  | -0.87 | -1.09 | 0.79  | -2.00 | 0.66  | -0.11 |
| Q16799 | Reticulon-1                                                      | RTN1     | -0.84 | 4.19 | 0.24  | 0.07  | 1.65  | 0.80  | 0.24  | -2.13 | 0.27  | -0.35 | 0.10  | -0.88 |
| Q8NS12 | TBC1 domain family member 19                                     | TBC1D19  | -0.84 | 1.36 | 1.84  | -0.48 | -0.77 | -0.50 | 1.37  | 1.00  | -0.53 | -0.94 | -0.55 | -0.44 |
| Q6P1X5 | Transcription initiation factor TFIID subunit 2                  | TAF2     | -0.85 | 1.80 | -0.10 | -0.17 | -0.44 | -0.19 | 2.77  | -0.37 | -0.17 | -0.88 | -0.13 | -0.32 |
| Q9NYS0 | NF-kappa-B inhibitor-interacting Ras-like protein 1              | NKIRAS1  | -0.85 | 0.81 | 0.79  | 0.32  | -1.69 | 1.11  | 0.44  | -0.11 | 0.14  | -1.83 | 0.78  | 0.04  |
| O75912 | Diacylglycerol kinase iota                                       | DGKI     | -0.85 | 3.99 | 0.84  | 1.75  | 0.74  | 0.84  | -1.15 | -0.65 | -0.26 | -1.29 | -0.13 | -0.70 |
| Q9Y2K5 | R3H domain-containing protein 2                                  | R3HDM2   | -0.85 | 0.96 | 0.56  | 0.00  | -1.80 | 0.45  | 1.92  | -0.66 | -0.92 | 0.29  | 0.39  | -0.23 |
| Q9HCE3 | Zinc finger protein 532                                          | ZNF532   | -0.85 | 1.08 | -0.59 | -0.74 | 1.05  | 0.10  | 1.40  | -0.60 | -0.98 | 0.53  | 0.18  | 0.65  |
| Q96LT7 | Guanine nucleotide exchange C9orf72                              | C9orf72  | -0.85 | 1.00 | -0.82 | 1.39  | -0.99 | 1.19  | 0.39  | -0.95 | -0.91 | -0.78 | 1.19  | 0.30  |
| Q96E39 | RNA binding motif protein, X-linked-like-1                       | RBMXL1   | -0.85 | 1.20 | 0.99  | 0.64  | -1.51 | 0.60  | 0.61  | -1.25 | -0.28 | -1.34 | 0.79  | 0.75  |
| P25713 | Metallothionein-3                                                | MT3      | -0.85 | 0.71 | -0.86 | 0.48  | -0.28 | 0.70  | 0.83  | -1.54 | -1.45 | 1.42  | 0.44  | 0.25  |
| Q70IA6 | MOB kinase activator 2                                           | MOB2     | -0.85 | 3.58 | -0.01 | 1.58  | -0.44 | 1.02  | 0.57  | -1.23 | -1.79 | -0.18 | 0.42  | 0.05  |
| Q8NHG7 | Small VCP/p97-interacting protein                                | SVIP     | -0.85 | 0.54 | -1.75 | 0.53  | 1.01  | 0.37  | 0.54  | -1.80 | -0.37 | 0.39  | 0.38  | 0.71  |
| Q9NQW6 | Anillin                                                          | ANLN     | -0.85 | 1.15 | 0.69  | -1.83 | 0.32  | 0.05  | 2.09  | -0.33 | -0.26 | -0.15 | 0.11  | -0.70 |
| Q9Y630 | Calcineurin-binding protein cabin-1                              | CABIN1   | -0.85 | 1.25 | 0.97  | 1.66  | -0.96 | 0.47  | -0.78 | 0.96  | -0.72 | -1.17 | 0.35  | -0.79 |
| Q9UHP3 | Ubiquitin carboxyl-terminal hydrolase 25                         | USP25    | -0.85 | 1.62 | 0.52  | 1.74  | -0.53 | 0.12  | -0.21 | -1.52 | 0.08  | 0.79  | 0.47  | -1.48 |
| O14772 | Fucose-1-phosphate guanylyltransferase                           | FPGT     | -0.85 | 1.05 | -1.25 | 0.42  | 0.07  | 0.94  | 1.01  | -1.45 | -1.43 | 0.17  | 0.87  | 0.64  |
| P00367 | Glutamate dehydrogenase 1, mitochondrial                         | GLUD1    | -0.85 | 2.79 | -0.69 | -0.27 | 1.81  | 0.35  | 1.16  | -1.85 | 0.05  | -0.10 | 0.05  | -0.51 |
| Q16623 | Syntaxin-1A                                                      | STX1A    | -0.85 | 2.42 | -0.26 | 0.80  | -0.29 | -0.12 | 2.04  | -1.76 | 0.67  | -0.44 | -0.08 | -0.54 |
| Q81ZD0 | Sterile alpha motif domain-containing protein 14                 | SAMD14   | -0.85 | 0.99 | -0.15 | -0.17 | -0.52 | 0.76  | 1.22  | 0.05  | -2.39 | 0.78  | 0.51  | -0.09 |
| P36915 | Guanine nucleotide-binding protein-like 1                        | GNL1     | -0.85 | 2.61 | 0.98  | 1.38  | 0.06  | 0.46  | -0.61 | 0.02  | 0.55  | -2.08 | 0.17  | -0.94 |
| Q96J87 | CUGBP Elav-like family member 6                                  | CELF6    | -0.85 | 0.75 | -0.24 | -0.67 | -0.68 | 1.14  | 1.36  | -1.02 | 1.12  | -1.27 | 0.81  | -0.56 |
| Q8WW38 | Zinc finger protein ZFPM2                                        | ZFPM2    | -0.85 | 0.81 | -0.48 | 1.33  | -0.67 | 1.40  | -0.61 | -0.56 | -0.57 | -0.85 | 1.59  | -0.58 |
| Q9BX13 | Cytosolic 5'-nucleotidase 1A                                     | NT5C1A   | -0.85 | 1.15 | 1.08  | 0.76  | -1.43 | 1.03  | -0.16 | 0.02  | -1.11 | -1.44 | 0.68  | 0.58  |
| Q9BV44 | THUMP domain-containing protein 3                                | THUMPD3  | -0.85 | 1.31 | -0.01 | 1.75  | -0.64 | 1.00  | -0.68 | -0.43 | -0.84 | -1.31 | 1.20  | -0.04 |
| O15047 | Histone-lysine N-methyltransferase SETD1A                        | SETD1A   | -0.85 | 1.23 | 1.76  | -0.89 | -1.01 | 0.59  | 0.91  | -0.33 | 0.42  | -1.19 | 0.65  | -0.90 |
| Q5T8L3 | Protein FAM102B                                                  | FAM102B  | -0.85 | 1.12 | 1.33  | 0.89  | -1.10 | 0.19  | -0.05 | 1.48  | -0.94 | -1.15 | 0.20  | -0.86 |
| Q15287 | RNA-binding protein with serine-rich domain 1                    | RNPS1    | -0.85 | 2.07 | -0.07 | 0.23  | 1.08  | 0.99  | -0.24 | -1.95 | -0.99 | -0.62 | 0.38  | 1.19  |
| Q9BX55 | AP-1 complex subunit mu-1                                        | APIM1    | -0.86 | 1.83 | -0.10 | 1.75  | -0.04 | 0.88  | -0.70 | -0.72 | -0.24 | -1.82 | 0.87  | 0.12  |
| Q8WZA2 | Rap guanine nucleotide exchange factor 4                         | RAPGEF4  | -0.86 | 1.64 | 0.70  | 0.90  | -1.79 | 0.78  | 1.09  | -0.81 | -1.40 | 0.09  | 0.17  | 0.26  |
| P21281 | V-type proton ATPase subunit B, brain isoform                    | ATP6V1B2 | -0.86 | 3.44 | 0.31  | 0.83  | 1.37  | 0.59  | -0.39 | -1.74 | -0.56 | 0.17  | 0.79  | -1.36 |
| Q61Q19 | Centriole, cilia and spindle-associated protein                  | CCSAP    | -0.86 | 2.11 | 2.48  | 1.02  | -0.67 | -0.24 | -0.49 | -0.35 | -0.37 | -0.73 | -0.43 | -0.23 |
| Q92871 | Phosphomannomutase 1                                             | PMM1     | -0.86 | 0.90 | 0.19  | -0.32 | 0.40  | 1.41  | -0.62 | 0.18  | 0.65  | 1.00  | -0.84 | -2.04 |
| P21695 | Glycerol-3-phosphate dehydrogenase [NAD(+)], cytoplasmic         | GPD1     | -0.86 | 1.47 | -1.07 | 0.99  | 1.04  | -0.07 | 0.66  | -1.27 | -0.47 | 1.35  | 0.14  | -1.29 |
| Q9UKT7 | F-box/LRR-repeat protein 3                                       | FBXL3    | -0.86 | 1.61 | -0.12 | -0.28 | -0.54 | -0.13 | 2.81  | -0.21 | -0.29 | -0.62 | -0.29 | -0.33 |

|        |                                                                                |          |       |      |       |       |       |       |       |       |       |       |       |       |
|--------|--------------------------------------------------------------------------------|----------|-------|------|-------|-------|-------|-------|-------|-------|-------|-------|-------|-------|
| O75147 | Obscurin-like protein 1                                                        | OBSL1    | -0.86 | 1.27 | -0.83 | -0.17 | 0.02  | 0.57  | 1.79  | -2.07 | -0.11 | -0.08 | 0.60  | 0.27  |
| P08311 | Cathepsin G                                                                    | CTSG     | -0.86 | 0.78 | 1.18  | 0.00  | -0.62 | 0.45  | -0.05 | 1.34  | -1.53 | 0.33  | -1.59 | 0.49  |
| Q9GZY8 | Mitochondrial fission factor                                                   | MFF      | -0.86 | 2.65 | 0.29  | -0.12 | -0.48 | 0.94  | 1.65  | -0.28 | -0.41 | -2.16 | 0.38  | 0.17  |
| O95817 | BAG family molecular chaperone regulator 3                                     | BAG3     | -0.86 | 1.62 | -0.34 | 1.96  | -0.79 | 1.47  | -0.61 | -0.60 | -0.48 | 0.67  | -0.65 | -0.64 |
| Q9BQE5 | Apolipoprotein L2                                                              | APOL2    | -0.87 | 1.52 | -0.46 | 1.70  | -0.43 | 0.66  | 0.10  | -0.24 | 0.00  | -2.19 | 0.28  | 0.57  |
| Q9H981 | Actin-related protein 8                                                        | ACTR8    | -0.87 | 0.61 | -1.38 | 0.32  | 0.72  | 0.71  | 0.41  | -1.43 | -1.43 | 0.97  | 0.84  | 0.28  |
| Q81Z69 | tRNA (uracil-5-)-methyltransferase homolog A                                   | TRMT2A   | -0.87 | 0.99 | 0.43  | -0.65 | -0.78 | 0.57  | 1.56  | -0.65 | 1.70  | -0.97 | -0.61 | -0.61 |
| Q7L5D6 | Golgi to ER traffic protein 4 homolog                                          | GET4     | -0.87 | 2.24 | 1.19  | -0.22 | -0.76 | 0.46  | 1.38  | 0.07  | -0.10 | -2.16 | 0.32  | -0.19 |
| Q99081 | Transcription factor 12                                                        | TCF12    | -0.87 | 1.75 | -0.10 | -0.27 | -0.46 | -0.15 | 2.82  | -0.29 | -0.29 | -0.59 | -0.34 | -0.33 |
| O14594 | Neurocan core protein                                                          | NCAN     | -0.87 | 1.12 | 0.08  | -0.86 | 0.61  | -0.28 | 1.70  | -1.09 | -1.10 | 1.50  | -0.07 | -0.50 |
| Q53GL7 | Protein mono-ADP-ribosyltransferase PARP10                                     | PARP10   | -0.87 | 2.50 | -0.22 | 1.52  | 0.33  | 1.08  | -0.51 | -2.23 | 0.04  | -0.25 | -0.01 | 0.24  |
| Q15311 | RalA-binding protein 1                                                         | RALBP1   | -0.87 | 1.28 | 1.74  | 1.05  | -0.47 | -0.25 | -0.68 | 0.76  | 0.65  | -1.47 | -0.43 | -0.90 |
| P20339 | Ras-related protein Rab-5A                                                     | RAB5A    | -0.87 | 1.05 | 2.33  | -0.01 | -1.38 | -0.29 | 0.58  | 0.03  | -0.96 | 0.30  | -0.45 | -0.15 |
| O75382 | Tripartite motif-containing protein 3                                          | TRIM3    | -0.87 | 1.99 | 0.84  | 1.45  | -0.96 | 0.69  | -0.12 | -0.13 | -0.02 | -2.01 | 0.72  | -0.46 |
| P20591 | Interferon-induced GTP-binding protein Mx1                                     | MX1      | -0.87 | 1.27 | 0.55  | 1.65  | -0.81 | 0.29  | -0.30 | 0.55  | -1.65 | -1.27 | 0.42  | 0.58  |
| Q9Y5L0 | Transportin-3                                                                  | TNPO3    | -0.87 | 1.79 | -0.94 | 0.43  | -0.19 | 1.03  | 1.44  | -1.07 | -1.63 | 0.41  | 0.83  | -0.31 |
| Q9NP81 | Serine--tRNA ligase, mitochondrial                                             | SARS2    | -0.87 | 1.57 | -0.90 | 0.20  | 1.97  | -0.11 | 0.45  | -1.67 | 0.58  | -0.89 | 0.36  | 0.01  |
| Q5VWQ0 | Lysine-specific demethylase 9                                                  | RSBN1    | -0.87 | 1.47 | -0.09 | -0.21 | -0.52 | -0.35 | 2.79  | -0.22 | -0.18 | -0.78 | -0.28 | -0.14 |
| Q52LD8 | Raftlin-2                                                                      | RFTN2    | -0.87 | 1.48 | -0.33 | 1.75  | -0.86 | 1.53  | -0.54 | -0.50 | -0.46 | -0.98 | 0.88  | -0.51 |
| O75781 | Paralemin-1                                                                    | PALM     | -0.87 | 2.36 | -0.03 | 2.09  | -0.57 | 0.39  | 0.24  | -1.19 | -1.56 | -0.06 | 0.40  | 0.29  |
| Q9H2M9 | Rab3 GTPase-activating protein non-catalytic subunit                           | RAB3GAP2 | -0.87 | 1.32 | -0.11 | 0.69  | -0.03 | 0.23  | 0.69  | -0.86 | -2.12 | -0.32 | 0.23  | 1.60  |
| Q14289 | Protein-tyrosine kinase 2-beta                                                 | PTK2B    | -0.88 | 5.70 | 1.06  | -0.30 | 0.49  | 0.34  | 1.85  | -1.22 | -0.88 | 0.44  | -0.78 | -0.98 |
| Q9P244 | Leucine-rich repeat and fibronectin type III domain-containing protein 1       | LRFN1    | -0.88 | 1.47 | -0.09 | 2.79  | -0.52 | -0.28 | -0.29 | -0.13 | -0.33 | -0.74 | -0.22 | -0.19 |
| P62333 | 26S proteasome regulatory subunit 10B                                          | PSMC6    | -0.88 | 2.36 | -0.18 | 1.54  | 0.06  | 0.36  | 0.39  | 0.29  | -1.66 | -1.68 | 0.81  | 0.07  |
| Q725L9 | Interferon regulatory factor 2-binding protein 2                               | IRF2BP2  | -0.88 | 1.03 | -0.39 | -0.54 | -0.78 | 1.59  | 1.31  | -0.57 | -0.51 | -0.89 | 1.40  | -0.60 |
| Q86V48 | Leucine zipper protein 1                                                       | LUZP1    | -0.88 | 0.84 | 0.92  | 0.14  | -1.49 | 0.68  | 0.74  | 0.69  | -2.05 | -0.18 | 0.42  | 0.12  |
| P55795 | Heterogeneous nuclear ribonucleoprotein H2                                     | HNRNPH2  | -0.88 | 1.60 | 1.43  | -0.90 | -1.00 | 1.03  | 1.10  | -0.46 | -0.95 | -1.02 | 0.84  | -0.06 |
| Q6ZW86 | BTB/POZ domain-containing protein KCTD8                                        | KCTD8    | -0.88 | 0.47 | -1.04 | 0.86  | 1.11  | 0.87  | -1.19 | -1.14 | 0.17  | 0.50  | 0.97  | -1.11 |
| Q9UHC7 | E3 ubiquitin-protein ligase makorin-1                                          | MKRN1    | -0.88 | 1.62 | -0.50 | 1.31  | -0.29 | 0.60  | 0.55  | -2.37 | -0.42 | 0.58  | 0.25  | 0.30  |
| P21980 | Protein-glutamine gamma-glutamyltransferase 2                                  | TGM2     | -0.88 | 1.12 | -0.99 | 2.44  | -0.43 | -0.38 | 0.64  | -1.08 | -0.20 | 0.25  | -0.01 | -0.25 |
| Q8IXQ6 | Protein mono-ADP-ribosyltransferase PARP9                                      | PARP9    | -0.88 | 0.48 | -1.25 | -0.01 | 0.50  | 0.86  | 0.52  | -1.83 | -1.03 | 0.84  | 0.92  | 0.47  |
| P05455 | Lupus La protein                                                               | SSB      | -0.88 | 1.29 | -0.40 | 0.60  | 0.32  | -0.01 | 0.92  | 0.07  | -2.61 | 0.81  | 0.06  | 0.23  |
| Q17RY0 | Cytoplasmic polyadenylation element-binding protein 4                          | CPEB4    | -0.89 | 1.60 | -0.13 | 0.20  | -1.19 | 0.82  | 1.95  | -1.49 | 0.27  | 0.30  | 0.08  | -0.80 |
| Q8IWQ3 | Serine/threonine-protein kinase BRSK2                                          | BRSK2    | -0.89 | 0.86 | -1.78 | 0.97  | 0.34  | 0.35  | 1.15  | -1.69 | -0.17 | 0.61  | 0.24  | -0.02 |
| Q9Y5M8 | Signal recognition particle receptor subunit beta                              | SRPRB    | -0.89 | 0.87 | 0.87  | 0.33  | -1.70 | 0.25  | 1.28  | 0.62  | 0.00  | -1.76 | -0.09 | 0.20  |
| O43172 | U4/U6 small nuclear ribonucleoprotein Prp4                                     | PRPF4    | -0.89 | 0.78 | -0.97 | 1.44  | 0.10  | 0.38  | -0.01 | -1.08 | -1.82 | 0.38  | 0.81  | 0.77  |
| Q92947 | Glutaryl-CoA dehydrogenase, mitochondrial                                      | GCDH     | -0.89 | 0.72 | -1.44 | 0.65  | 0.73  | 0.40  | 0.55  | -1.43 | -1.45 | 0.82  | 0.61  | 0.57  |
| P25440 | Bromodomain-containing protein 2                                               | BRD2     | -0.89 | 1.87 | 0.42  | 2.71  | -0.56 | -0.16 | -0.48 | -0.27 | -0.24 | -0.73 | -0.40 | -0.29 |
| Q9NQX3 | Gephyrin                                                                       | GPHN     | -0.89 | 1.74 | 0.08  | 0.74  | -0.09 | 0.30  | 0.77  | -0.56 | -2.57 | 0.70  | 0.57  | 0.04  |
| Q9BUE6 | Iron-sulfur cluster assembly 1 homolog, mitochondrial                          | ISCA1    | -0.89 | 1.35 | 0.82  | 0.64  | 0.11  | 1.19  | -1.32 | 1.07  | 0.40  | -1.60 | -0.62 | -0.69 |
| Q9BY43 | Charged multivesicular body protein 4a                                         | CHMP4A   | -0.89 | 0.88 | -0.20 | 0.57  | 1.22  | -1.35 | 0.80  | -1.28 | -1.38 | 0.12  | 0.83  | 0.67  |
| Q9Y5F6 | Protocadherin gamma-C5                                                         | PCDHGC5  | -0.89 | 1.40 | -0.54 | 1.45  | -0.80 | 0.92  | 0.46  | -0.56 | -0.67 | -1.09 | -0.73 | 1.56  |
| Q9BX68 | Histidine triad nucleotide-binding protein 2, mitochondrial                    | HINT2    | -0.89 | 1.75 | 1.45  | 0.42  | 1.02  | 0.42  | -1.56 | -1.45 | 0.67  | 0.01  | -0.36 | -0.62 |
| O94953 | Lysine-specific demethylase 4B                                                 | KDM4B    | -0.89 | 1.26 | -1.60 | 1.92  | 0.00  | 0.53  | 0.54  | -0.03 | -1.14 | -0.83 | 0.40  | 0.21  |
| Q8WVK2 | U4/U6.U5 small nuclear ribonucleoprotein 27 kDa protein                        | SNRNP27  | -0.89 | 0.85 | 1.76  | -1.32 | 0.65  | 0.03  | -0.10 | 1.06  | -1.47 | -0.60 | 0.18  | -0.18 |
| Q14165 | Malectin                                                                       | MLEC     | -0.89 | 1.08 | -0.67 | -0.42 | 0.26  | 0.89  | 1.17  | -0.10 | 0.26  | -2.33 | 0.79  | 0.15  |
| Q53GS9 | U4/U6.U5 tri-snRNP-associated protein 2                                        | USP39    | -0.89 | 1.61 | 0.59  | 0.56  | 1.22  | 0.68  | -1.41 | -1.27 | -1.22 | -0.11 | 1.12  | -0.17 |
| P16157 | Ankyrin-1                                                                      | ANK1     | -0.89 | 2.15 | -0.25 | 1.66  | -0.53 | 0.74  | 0.38  | -0.98 | -0.13 | -1.90 | 0.74  | 0.27  |
| Q643R3 | Lysophospholipid acyltransferase LPCAT4                                        | LPCAT4   | -0.89 | 1.20 | 1.04  | 0.26  | -0.61 | -0.12 | 0.77  | 0.15  | 0.79  | -2.48 | -0.03 | 0.23  |
| Q99471 | Prefoldin subunit 5                                                            | PFDN5    | -0.90 | 1.88 | -0.08 | -0.15 | -0.48 | -0.15 | 2.79  | -0.22 | -0.24 | -0.73 | -0.40 | -0.34 |
| Q96E17 | Ras-related protein Rab-3C                                                     | RAB3C    | -0.90 | 1.44 | 0.26  | 1.44  | 0.42  | -0.41 | -0.18 | -0.61 | 1.37  | -2.03 | 0.06  | -0.32 |
| Q9UHW9 | Solute carrier family 12 member 6                                              | SLC12A6  | -0.90 | 1.77 | 0.61  | 2.38  | -0.88 | 0.42  | -0.71 | 0.27  | -0.46 | -0.93 | -0.11 | -0.59 |
| P00519 | Tyrosine-protein kinase ABL1                                                   | ABL1     | -0.90 | 1.61 | -0.01 | 2.80  | -0.44 | -0.19 | -0.43 | -0.18 | -0.30 | -0.68 | -0.23 | -0.34 |
| O95782 | AP-2 complex subunit alpha-1                                                   | AP2A1    | -0.90 | 0.86 | -1.24 | 0.34  | 1.65  | 0.60  | -0.32 | -1.28 | -1.16 | 0.83  | 0.69  | -0.10 |
| Q96K21 | Abscission/NoCut checkpoint regulator                                          | ZFYVE19  | -0.90 | 1.26 | 1.32  | 1.39  | -1.14 | 0.07  | -0.27 | 0.77  | -0.84 | -1.59 | 0.31  | -0.03 |
| Q5T5U3 | Rho GTPase-activating protein 21                                               | ARHGAP21 | -0.90 | 1.17 | 1.71  | 0.67  | -0.38 | 0.39  | -1.09 | 0.75  | 0.53  | -1.58 | -0.10 | -0.89 |
| Q9NQ86 | E3 ubiquitin-protein ligase TRIM36                                             | TRIM36   | -0.90 | 2.66 | 0.08  | -0.33 | 2.23  | 0.22  | 0.10  | -1.24 | -1.37 | 0.18  | 0.52  | -0.37 |
| Q6ZS17 | Rho family-interacting cell polarization regulator 1                           | RIPOR1   | -0.90 | 0.70 | -0.75 | 1.13  | -0.97 | 1.17  | 0.30  | -0.85 | -0.90 | -1.12 | 1.00  | 1.00  |
| Q61Q22 | Ras-related protein Rab-12                                                     | RAB12    | -0.90 | 3.77 | -0.07 | 1.19  | 0.59  | -0.77 | 1.94  | -1.31 | 0.11  | -0.33 | -0.92 | -0.44 |
| P53667 | LIM domain kinase 1                                                            | LIMK1    | -0.90 | 0.93 | -0.89 | -0.26 | 0.65  | 0.47  | 1.13  | -1.58 | -1.49 | 1.02  | 0.59  | 0.36  |
| O15269 | Serine palmitoyltransferase 1                                                  | SPTLC1   | -0.90 | 1.17 | 0.87  | -0.84 | 0.89  | 1.33  | -0.95 | -0.86 | -0.85 | -1.11 | 1.08  | 0.44  |
| O60678 | Protein arginine N-methyltransferase 3                                         | PRMT3    | -0.91 | 0.90 | 0.52  | 0.63  | -0.66 | 0.61  | -0.02 | 0.76  | -0.95 | -2.26 | 0.66  | 0.71  |
| P62837 | Ubiquitin-conjugating enzyme E2 D2                                             | UBE2D2   | -0.91 | 1.01 | -0.61 | 1.79  | 1.44  | -0.70 | -0.76 | -0.66 | -0.60 | -0.93 | 0.76  | 0.25  |
| P10606 | Cytochrome c oxidase subunit 5B, mitochondrial                                 | COX5B    | -0.91 | 1.28 | -0.37 | 0.50  | 1.07  | 0.28  | -0.06 | -0.23 | 0.33  | -2.52 | 0.08  | 0.92  |
| Q9NUQ6 | SPATS2-like protein                                                            | SPATS2L  | -0.91 | 1.56 | 1.13  | -0.11 | -0.80 | 0.92  | 0.47  | 0.99  | 0.46  | -1.72 | 0.01  | -1.36 |
| Q9UBW8 | COP9 signalosome complex subunit 7a                                            | COPS7A   | -0.91 | 1.35 | -1.15 | 0.24  | 0.15  | 0.82  | 1.38  | -1.28 | -1.40 | 0.31  | 1.14  | -0.22 |
| P35527 | Keratin, type I cytoskeletal 9                                                 | KRT9     | -0.91 | 3.27 | 0.79  | -1.07 | 1.48  | -0.01 | 1.46  | -0.03 | -1.33 | -0.87 | 0.16  | -0.58 |
| Q5UIP0 | Telomere-associated protein RIF1                                               | RIF1     | -0.91 | 2.68 | -0.51 | 0.48  | 0.46  | 1.31  | 0.61  | -2.37 | 0.26  | -0.60 | 0.39  | -0.01 |
| Q9UQ26 | Regulating synaptic membrane exocytosis protein 2                              | RIMS2    | -0.91 | 1.60 | 2.18  | 0.48  | -1.10 | 0.32  | -0.23 | -0.80 | 0.65  | 0.25  | -0.80 | -0.94 |
| Q93050 | V-type proton ATPase 116 kDa subunit a isoform 1                               | ATP6V0A1 | -0.91 | 1.85 | -0.70 | 0.74  | 0.68  | 0.79  | 0.34  | -1.64 | -1.52 | -0.42 | 1.07  | 0.67  |
| Q15048 | Leucine-rich repeat-containing protein 14                                      | LRRCL14  | -0.91 | 1.34 | 1.51  | 0.43  | 0.01  | -0.74 | 0.24  | 1.53  | -0.92 | -1.62 | -0.13 | -0.30 |
| Q9UBL0 | cAMP-regulated phosphoprotein 21                                               | ARPP21   | -0.91 | 1.77 | 1.72  | 0.79  | -0.51 | 0.03  | -0.26 | -0.80 | -0.86 | -1.30 | -0.21 | 1.41  |
| Q14012 | Calcium/calmodulin-dependent protein kinase type 1                             | CAMK1    | -0.91 | 2.36 | -0.10 | -0.44 | 0.61  | -0.04 | 2.09  | -0.43 | -1.96 | 0.07  | 0.20  | 0.00  |
| Q96DM3 | Regulator of MON1-CCZ1 complex                                                 | RMCI1    | -0.91 | 1.29 | 1.32  | 0.74  | -1.25 | 0.65  | -0.06 | -1.08 | -0.47 | -1.42 | 0.90  | 0.68  |
| Q8IXT5 | RNA-binding protein 12B                                                        | RBM12B   | -0.91 | 0.75 | 1.54  | -0.95 | -0.85 | 0.50  | 0.66  | 1.37  | -1.04 | -1.04 | 0.26  | -0.47 |
| Q5V289 | DENN domain-containing protein 4C                                              | DENND4C  | -0.92 | 1.75 | -0.57 | 1.13  | 1.26  | 0.89  | -0.96 | -0.82 | -0.87 | -1.31 | 0.35  | 0.91  |
| O15066 | Kinesin-like protein KIF3B                                                     | KIF3B    | -0.92 | 1.35 | 0.89  | 0.17  | -0.13 | 0.59  | -0.02 | 0.61  | -0.15 | -2.68 | 0.31  | 0.41  |
| Q9UL51 | Potassium/sodium hyperpolarization-activated cyclic nucleotide-gated channel 2 | HCN2     | -0.92 | 1.44 | -0.65 | 0.61  | 0.69  | -0.69 | 1.54  | -0.52 | 1.54  | -1.06 | -0.69 | -0.78 |
| Q86V81 | THO complex subunit 4                                                          | ALYREF   | -0.92 | 1.90 | 1.15  | 0.69  | 0.57  | 0.75  | -1.32 | -0.70 | 0.53  | -0.46 | -1.80 | 0.59  |
| P35749 | Myosin-11                                                                      | MYH11    | -0.92 | 1.48 | -1.39 | 1.09  | 1.94  | 0.04  | -0.11 | -0.82 | -0.38 | -1.02 | 0.17  | 0.47  |
| Q9Y2L9 | Leucine-rich repeat and calponin homology domain-containing protein 1          | LRCH1    | -0.92 | 1.24 | -0.95 | 0.91  | -0.08 | 0.88  | 0.60  | -1.00 | -1.10 | -1.32 | 1.16  | 0.90  |
| Q641Q2 | WASH complex subunit 2A                                                        | WASHC2A  | -0.92 | 1.94 | 1.10  | 1.07  | -0.21 | 0.02  | -0.08 | 0.46  | 0.20  | -0.26 | -2.49 | 0.19  |
| Q12874 | Splicing factor 3A subunit 3                                                   | SF3A3    | -0.92 | 0.96 | 1.15  | 0.34  | -1.71 | 0.69  | 0.64  | 0.23  | -0.49 | -1.74 | 0.57  | 0.33  |



|        |                                                              |           |       |      |       |       |       |       |       |       |       |       |       |       |
|--------|--------------------------------------------------------------|-----------|-------|------|-------|-------|-------|-------|-------|-------|-------|-------|-------|-------|
| Q7Z6L0 | Proline-rich transmembrane protein 2                         | PRRT2     | -0.92 | 1.38 | -0.59 | 1.86  | -0.51 | 0.57  | 0.13  | -1.85 | -0.58 | 0.62  | 0.59  | -0.24 |
| Q9Y2D8 | Afadin- and alpha-actinin-binding protein                    | SSX2IP    | -0.92 | 3.35 | -0.43 | 1.65  | -0.06 | 0.58  | 0.88  | 0.30  | -2.08 | -0.70 | 0.10  | -0.25 |
| Q5SYC1 | Clavesin-2                                                   | CLVS2     | -0.92 | 2.48 | -0.13 | 0.19  | 1.58  | 0.80  | -0.22 | -2.29 | -0.42 | 0.32  | 0.43  | -0.26 |
| Q9Y6N8 | Cadherin-10                                                  | CDH10     | -0.93 | 1.32 | -0.14 | 2.81  | -0.51 | -0.33 | -0.35 | -0.18 | -0.24 | -0.65 | -0.24 | -0.17 |
| Q8NF99 | Zinc finger protein 397                                      | ZNF397    | -0.93 | 1.49 | -1.42 | 1.46  | -0.32 | 1.13  | 0.71  | -0.30 | -1.54 | -0.47 | 0.48  | 0.27  |
| P499I8 | Cyclin-dependent kinase inhibitor 1C                         | CDKN1C    | -0.93 | 2.03 | 2.76  | -0.39 | 0.18  | -0.15 | -0.36 | -0.31 | -0.19 | -0.81 | -0.42 | -0.31 |
| P01111 | GTPase NRas                                                  | NRAS      | -0.93 | 1.37 | 0.51  | 0.83  | -0.22 | 0.18  | 0.22  | -1.76 | -1.81 | 0.40  | 0.72  | 0.93  |
| P22681 | E3 ubiquitin-protein ligase CBL                              | CBL       | -0.93 | 1.60 | -0.13 | 2.81  | -0.41 | -0.31 | -0.24 | -0.18 | -0.19 | -0.71 | -0.34 | -0.31 |
| Q5SY16 | Polynucleotide 5'-hydroxyl-kinase NOL9                       | NOL9      | -0.93 | 1.06 | 1.13  | -0.74 | -0.97 | 1.25  | 0.53  | 0.91  | -0.53 | -1.76 | 0.37  | -0.19 |
| Q66GS9 | Centrosomal protein of 135 kDa                               | CEP135    | -0.93 | 0.59 | -0.99 | 0.21  | 0.49  | 0.29  | 0.75  | -1.57 | -1.54 | 1.28  | 0.41  | 0.66  |
| Q10713 | Mitochondrial-processing peptidase subunit alpha             | PMPCA     | -0.93 | 1.76 | 0.63  | -0.69 | 2.05  | 0.55  | -0.78 | -0.64 | -0.80 | -1.24 | 0.39  | 0.53  |
| Q4V328 | GRIP1-associated protein 1                                   | GRIPAP1   | -0.93 | 1.17 | 0.65  | 0.83  | -0.66 | 0.47  | 0.04  | 0.67  | 0.85  | -2.38 | 0.12  | -0.59 |
| Q9Y2J2 | Band 4.1-like protein 3                                      | EPB41L3   | -0.93 | 2.82 | 0.57  | 1.26  | -1.16 | 1.15  | 0.56  | -0.21 | -0.22 | -1.68 | 0.63  | -0.89 |
| P21796 | Voltage-dependent anion-selective channel protein 1          | VDAC1     | -0.93 | 3.62 | 0.67  | 0.97  | -0.27 | 0.80  | 0.68  | -1.87 | -1.02 | -0.61 | 1.13  | -0.48 |
| Q16798 | NADP-dependent malic enzyme, mitochondrial                   | ME3       | -0.93 | 1.21 | 0.79  | -0.31 | 1.20  | -0.52 | 0.19  | 0.92  | -2.04 | 0.77  | -0.04 | -0.96 |
| Q9NR50 | Translation initiation factor eIF-2B subunit gamma           | EIF2B3    | -0.93 | 1.12 | 1.00  | 0.20  | 0.44  | 0.46  | -0.82 | 0.85  | 0.58  | -2.34 | 0.20  | -0.57 |
| Q9BWE0 | Replication initiator 1                                      | REP1N1    | -0.93 | 0.75 | 0.74  | -0.94 | 0.35  | -0.53 | 1.30  | 1.11  | 1.03  | -1.20 | -0.92 | -0.94 |
| Q6IA86 | Blongator complex protein 2                                  | ELP2      | -0.93 | 1.54 | -0.07 | -0.23 | -0.53 | -0.29 | 2.81  | -0.29 | -0.18 | -0.63 | -0.28 | -0.30 |
| O14974 | Protein phosphatase 1 regulatory subunit 12A                 | PPP1R12A  | -0.94 | 2.30 | -0.74 | 0.55  | 0.45  | -0.14 | 1.99  | -0.99 | -1.10 | -0.83 | -0.18 | 1.03  |
| Q5VSL9 | Striatin-interacting protein 1                               | STRIP1    | -0.94 | 0.98 | 0.67  | 0.68  | 0.57  | 0.23  | -1.00 | 0.94  | -0.85 | -2.16 | 0.37  | 0.55  |
| Q9Y4D8 | Probable E3 ubiquitin-protein ligase HECTD4                  | HECTD4    | -0.94 | 0.92 | -0.61 | -0.34 | 1.30  | 0.48  | 0.26  | -0.35 | -2.33 | 0.29  | 0.72  | 0.59  |
| Q8IVL0 | Neuron navigator 3                                           | NAV3      | -0.94 | 1.05 | 1.82  | 0.19  | -0.28 | 0.16  | 0.00  | 1.53  | -0.84 | -1.17 | -0.34 | -0.37 |
| Q9ULX5 | RING finger protein 112                                      | RNF112    | -0.94 | 1.59 | -0.76 | 1.22  | 0.27  | 1.32  | -0.42 | -0.99 | -1.01 | -1.27 | 0.85  | 0.79  |
| Q13387 | C-Jun-amino-terminal kinase-interacting protein 2            | MAPK8IP2  | -0.94 | 1.89 | -0.51 | 0.75  | 0.88  | -0.33 | 1.07  | -1.43 | -0.63 | 0.69  | -1.49 | 1.01  |
| P0DN79 | Cystathionine beta-synthase-like protein                     | CBSL      | -0.94 | 1.67 | -0.51 | 0.99  | -0.11 | 0.89  | 0.44  | -0.36 | -2.44 | 0.21  | 0.77  | 0.10  |
| Q96Q05 | Trafficking protein particle complex subunit 9               | TRAPPC9   | -0.94 | 1.60 | 0.92  | 0.99  | -0.96 | 0.41  | 0.29  | 0.16  | 0.35  | -2.39 | 0.36  | -0.12 |
| P12429 | Annexin A3                                                   | ANXA3     | -0.94 | 1.79 | -1.26 | 0.82  | 1.07  | 1.00  | 0.14  | 0.18  | -1.43 | 0.83  | -0.01 | -1.34 |
| P62877 | E3 ubiquitin-protein ligase RBX1                             | RBX1      | -0.94 | 0.87 | -1.40 | 0.73  | 0.33  | 0.89  | 0.48  | -1.50 | -1.41 | 0.63  | 0.69  | 0.55  |
| Q969K3 | E3 ubiquitin-protein ligase RNF34                            | RNF34     | -0.94 | 1.02 | 0.28  | 0.31  | -1.68 | 0.80  | 1.46  | 0.18  | -1.65 | 0.17  | 0.53  | -0.40 |
| Q02040 | A-kinase anchor protein 17A                                  | AKAP17A   | -0.94 | 1.10 | 0.65  | -0.50 | -0.67 | -0.53 | 2.31  | -0.45 | 0.97  | -0.84 | -0.46 | -0.47 |
| Q16186 | Proteasomal ubiquitin receptor ADRM1                         | ADRM1     | -0.94 | 2.46 | 1.23  | 0.76  | -1.46 | 0.60  | 1.08  | -1.74 | -0.04 | -0.30 | 0.22  | -0.34 |
| Q9Y2W2 | VW domain-binding protein 11                                 | WBP11     | -0.94 | 2.51 | -0.09 | 0.16  | 1.32  | 0.56  | 0.33  | -1.40 | -1.38 | -1.20 | 0.93  | 0.78  |
| P17980 | 26S proteasome regulatory subunit 6A                         | PSMC3     | -0.95 | 1.21 | 0.93  | 1.06  | -0.21 | -0.05 | -0.38 | 0.60  | 0.43  | -2.42 | -0.45 | 0.48  |
| Q9BXM0 | Periaxin                                                     | PRX       | -0.95 | 2.55 | 0.10  | 0.79  | 1.15  | 0.60  | -0.36 | -1.78 | -1.62 | -0.05 | 0.75  | 0.42  |
| AOAVT1 | Ubiquitin-like modifier-activating enzyme 6                  | UBA6      | -0.95 | 1.35 | -1.57 | 1.10  | 0.89  | 0.60  | 0.43  | -1.35 | -1.29 | 0.34  | 0.51  | 0.35  |
| O94983 | Calmodulin-binding transcription activator 2                 | CAMTA2    | -0.95 | 2.72 | -0.21 | -0.35 | -0.64 | 1.91  | 1.74  | -0.25 | -0.48 | -1.15 | -0.30 | -0.26 |
| Q9Y520 | Protein PRRC2C                                               | PRRC2C    | -0.95 | 1.81 | 2.30  | -0.11 | 0.55  | -0.05 | -0.89 | 0.07  | -0.71 | 0.38  | -1.38 | -0.18 |
| O94967 | WD repeat-containing protein 47                              | WDR47     | -0.95 | 2.41 | -0.01 | 0.74  | -0.27 | 1.24  | 0.51  | -1.31 | -2.04 | 0.16  | 0.79  | 0.19  |
| P47869 | Gamma-aminobutyric acid receptor subunit alpha-2             | GABRA2    | -0.95 | 1.84 | 0.53  | 0.79  | 0.33  | -0.21 | 0.45  | 0.61  | 0.33  | -2.69 | 0.00  | -0.13 |
| Q99758 | ATP-binding cassette sub-family A member 3                   | ABCA3     | -0.95 | 0.57 | -0.98 | 0.24  | 0.03  | 0.80  | 0.65  | -1.61 | -1.53 | 0.68  | 0.83  | 0.91  |
| Q96XP1 | Diacylglycerol kinase eta                                    | DGKH      | -0.95 | 2.03 | 1.18  | -0.49 | -0.91 | 1.18  | 0.96  | -0.44 | -1.97 | 0.41  | 0.04  | 0.04  |
| Q7L804 | Rab11 family-interacting protein 2                           | RAB11FIP2 | -0.95 | 1.34 | 1.27  | 0.60  | -0.87 | 0.85  | -0.41 | 0.69  | 0.36  | -2.04 | 0.28  | -0.72 |
| Q8ITY4 | Katanin p60 ATPase-containing subunit A-like 2               | KATNAL2   | -0.95 | 1.06 | 0.14  | 0.27  | 0.22  | 0.28  | 0.35  | -0.38 | -2.65 | 1.11  | 0.42  | 0.24  |
| Q92615 | La-related protein 4B                                        | LARP4B    | -0.95 | 0.78 | -0.35 | -0.18 | -0.15 | 0.02  | 1.61  | -1.69 | -0.22 | -0.60 | -0.15 | 1.72  |
| Q13643 | Four and a half LIM domains protein 3                        | FHL3      | -0.95 | 2.05 | 0.55  | 0.05  | 0.27  | 0.73  | 0.46  | 0.47  | 0.18  | -2.67 | 0.49  | -0.53 |
| Q16143 | Beta-synuclein                                               | SNCB      | -0.96 | 1.20 | -0.85 | 0.53  | -0.48 | 0.19  | 1.93  | -1.52 | -0.96 | 0.86  | 0.03  | 0.25  |
| Q7Z6J0 | E3 ubiquitin-protein ligase SH3RF1                           | SH3RF1    | -0.96 | 1.48 | 0.56  | 1.78  | -0.98 | 1.07  | -0.87 | -0.70 | 0.56  | -1.07 | 0.38  | -0.74 |
| Q8NFG4 | Follistatin                                                  | FLCN      | -0.96 | 0.99 | 1.18  | -0.52 | -0.76 | 1.87  | -0.62 | -0.56 | 1.20  | -0.75 | -0.49 | -0.55 |
| Q9NUL3 | Double-stranded RNA-binding protein Staufen homolog 2        | STAU2     | -0.96 | 0.75 | 0.88  | 1.81  | -1.06 | -0.49 | -0.22 | 0.73  | 0.73  | -0.19 | -0.91 | -1.27 |
| Q8N110 | Dedicator of cytokinesis protein 4                           | DOCK4     | -0.96 | 1.39 | 0.38  | 1.56  | -0.68 | 0.17  | 0.05  | -2.07 | 0.84  | -0.74 | 0.60  | -0.12 |
| Q9H3K6 | BolA-like protein 2                                          | BOLA2     | -0.96 | 2.49 | -0.67 | 1.41  | 0.35  | 0.40  | 0.73  | -1.43 | -1.48 | -0.70 | 0.53  | 0.86  |
| Q86Y57 | C2 domain-containing protein 5                               | C2CD5     | -0.96 | 1.54 | 0.81  | 0.08  | 0.09  | 0.46  | 0.23  | 0.49  | 0.51  | -2.74 | 0.25  | -0.17 |
| Q9P107 | GEM-interacting protein                                      | GMIP      | -0.96 | 0.70 | 0.49  | 0.34  | -0.97 | -0.79 | 1.79  | -0.36 | -0.41 | 1.51  | -0.85 | -0.76 |
| Q9BW30 | Tubulin polymerization-promoting protein family member 3     | TPPP3     | -0.96 | 0.87 | -1.22 | -0.18 | 0.55  | 0.45  | 1.42  | -1.33 | -1.28 | 1.19  | 0.33  | 0.06  |
| P22105 | Tenascin-X                                                   | TNXB      | -0.96 | 1.29 | 0.92  | -0.08 | 1.83  | -0.19 | -1.07 | 0.53  | -1.02 | -1.37 | -0.16 | 0.63  |
| Q9NUQ8 | ATP-binding cassette sub-family F member 3                   | ABCF3     | -0.96 | 1.42 | 0.51  | -0.29 | 1.03  | 0.30  | -0.02 | -0.34 | -2.56 | 0.85  | 0.29  | 0.21  |
| Q99755 | Phosphatidylinositol 4-phosphate 5-kinase type-1 alpha       | PIPSK1A   | -0.96 | 2.16 | 0.42  | 0.96  | -1.06 | 1.17  | 0.52  | -1.53 | -0.25 | -1.29 | 1.05  | 0.01  |
| P14625 | Endoplasmic                                                  | HSP90B1   | -0.96 | 1.55 | -0.79 | -0.37 | 0.57  | -0.27 | 2.50  | 0.15  | -1.20 | -0.14 | -0.30 | -0.16 |
| P34947 | G protein-coupled receptor kinase 5                          | GRK5      | -0.96 | 1.53 | 0.60  | 1.49  | -1.48 | 1.22  | -0.23 | -1.59 | -0.18 | -0.13 | 0.29  | 0.01  |
| Q9BQ04 | RNA-binding protein 4B                                       | RBM4B     | -0.96 | 1.31 | 1.05  | 0.12  | -1.60 | 1.02  | 0.84  | -0.02 | 0.18  | 1.75  | 0.57  | -0.40 |
| Q6XUX3 | Dual serine/threonine and tyrosine protein kinase            | DSTYK     | -0.97 | 0.63 | -1.24 | 0.56  | 0.47  | 0.13  | 0.89  | -1.17 | -1.64 | 1.37  | 0.29  | 0.35  |
| P60880 | Synaptosomal-associated protein 25                           | SNAP25    | -0.97 | 3.06 | 0.13  | 2.13  | 0.14  | 0.50  | -0.41 | -1.07 | 0.38  | -1.55 | 0.25  | -0.51 |
| Q96T37 | RNA-binding protein 15                                       | RBM15     | -0.97 | 1.12 | 1.84  | -0.87 | -1.08 | 0.92  | 0.46  | 0.21  | -0.82 | -1.23 | 0.61  | -0.04 |
| Q16762 | Thiosulfate sulfurtransferase                                | TST       | -0.97 | 1.12 | -0.76 | 0.54  | 1.35  | 0.05  | 0.09  | -1.51 | -1.56 | 1.13  | 0.55  | 0.11  |
| Q8NEY1 | Neuron navigator 1                                           | NAV1      | -0.97 | 1.17 | -1.29 | 0.77  | 0.44  | 0.83  | 0.56  | -0.61 | -2.01 | -0.16 | 0.79  | 0.69  |
| Q9Y6X8 | Zinc fingers and homeoboxes protein 2                        | ZHX2      | -0.97 | 1.51 | 1.30  | 0.30  | -0.87 | -0.79 | 1.63  | -0.73 | -0.76 | -1.12 | 0.89  | 0.15  |
| Q8N336 | ELMO domain-containing protein 1                             | ELMOD1    | -0.97 | 1.63 | -0.47 | 0.88  | -0.34 | 0.66  | 0.95  | -1.18 | -2.06 | 0.36  | 0.75  | 0.45  |
| Q15111 | Inactive phospholipase C-like protein 1                      | PLCL1     | -0.97 | 2.16 | -0.78 | 1.91  | 0.77  | 0.75  | -0.63 | -1.28 | -0.34 | -0.91 | 0.75  | -0.23 |
| Q2UY09 | Collagen alpha-1(XV) chain                                   | COL28A1   | -0.98 | 0.92 | -0.28 | -0.40 | 2.57  | -0.36 | -0.44 | 0.89  | -0.43 | -0.72 | -0.44 | -0.38 |
| Q92547 | DNA topoisomerase 2-binding protein 1                        | TOPBP1    | -0.98 | 1.45 | -0.36 | -0.63 | -0.70 | 1.13  | 2.10  | -0.43 | -0.54 | -0.91 | 0.85  | -0.51 |
| Q6DN90 | IQ motif and SEC7 domain-containing protein 1                | IQSEC1    | -0.98 | 2.49 | 0.93  | 1.28  | -0.92 | 0.74  | 0.17  | -1.04 | 0.67  | -1.83 | 0.34  | -0.34 |
| Q6P995 | Protein FAM171B                                              | FAM171B   | -0.98 | 2.06 | -0.68 | 1.29  | -0.46 | 1.02  | 0.78  | -1.35 | -0.91 | -1.07 | 1.05  | 0.34  |
| Q15555 | Microtubule-associated protein RP/EB family member 2         | MAPRE2    | -0.98 | 3.78 | 0.62  | 1.08  | -0.66 | 1.05  | 0.74  | -1.11 | -0.01 | -1.91 | 0.59  | -0.38 |
| P56693 | Transcription factor SOX-10                                  | SOX10     | -0.98 | 1.25 | 0.76  | -0.20 | -1.55 | 0.73  | 1.63  | 0.13  | -1.34 | -0.52 | 0.75  | -0.40 |
| P50993 | Sodium/potassium-transporting ATPase subunit alpha-2         | ATP1A2    | -0.98 | 1.21 | 0.44  | 0.89  | 0.41  | 0.00  | -0.37 | 0.41  | -2.69 | 0.27  | 0.16  | 0.47  |
| Q5T2T1 | MAGUK p55 subfamily member 7                                 | MPF7      | -0.98 | 1.52 | -0.77 | 1.13  | -1.09 | 1.61  | 0.71  | -0.91 | 0.29  | -1.33 | -0.07 | 0.42  |
| Q92558 | Wiskott-Aldrich syndrome protein family member 1             | WASF1     | -0.98 | 1.52 | -0.70 | 1.00  | 0.35  | 0.27  | 0.68  | -2.55 | 0.50  | 0.32  | 0.12  | 0.00  |
| Q9P2R3 | Rabkynin-5                                                   | ANKFY1    | -0.98 | 1.57 | -0.32 | -0.32 | -0.56 | 0.54  | 2.28  | 0.28  | -0.41 | -1.64 | -0.03 | 0.18  |
| Q9CDD0 | Phosphatase and actin regulator 1                            | PHACTR1   | -0.98 | 2.18 | 0.56  | 1.67  | -1.26 | 0.97  | 0.10  | 0.08  | -0.31 | -0.74 | 0.51  | -1.56 |
| Q8N8S7 | Protein enabled homolog                                      | ENAH      | -0.99 | 1.33 | -1.30 | -0.08 | 1.59  | 0.55  | 0.67  | -0.97 | -1.48 | 0.86  | 0.33  | -0.17 |
| Q9P0K1 | Disintegrin and metalloprotease domain-containing protein 22 | ADAM22    | -0.99 | 2.59 | -0.32 | 2.02  | -0.88 | 0.86  | 0.61  | -0.33 | -0.78 | -1.10 | 0.67  | -0.75 |
| O43681 | ATPase ASNA1                                                 | ASNA1     | -0.99 | 1.36 | -0.36 | 0.36  | -0.72 | -0.32 | 2.53  | -1.13 | -0.22 | -0.37 | -0.24 | 0.47  |
| P46952 | 3-hydroxyanthranilate 3,4-dioxygenase                        | HAAO      | -0.99 | 2.19 | -0.40 | 1.03  | 0.43  | 0.78  | 0.24  | -0.32 | -2.16 | -1.05 | 0.84  | 0.60  |

|         |                                                                   |          |       |      |       |       |       |       |       |       |       |       |       |       |
|---------|-------------------------------------------------------------------|----------|-------|------|-------|-------|-------|-------|-------|-------|-------|-------|-------|-------|
| Q16531  | DNA damage-binding protein 1                                      | DDB1     | -0.99 | 0.76 | -0.63 | -0.07 | 0.69  | 0.49  | 0.45  | -1.09 | -2.14 | 1.09  | 0.71  | 0.48  |
| Q6P1M0  | Long-chain fatty acid transport protein 4                         | SLC22A4  | -0.99 | 1.74 | 0.54  | 1.35  | -0.29 | 0.18  | -0.01 | 0.64  | -2.35 | -0.69 | 0.02  | 0.60  |
| Q92561  | Phytanoyl-CoA hydroxylase-interacting protein                     | PHYHIP   | -0.99 | 3.35 | 1.10  | 0.99  | 0.07  | 0.63  | -0.07 | -0.82 | 0.61  | -2.31 | 0.01  | -0.21 |
| Q14137  | Ribosome biogenesis protein BOP1                                  | BOP1     | -0.99 | 1.65 | 0.80  | -1.04 | 0.57  | -0.03 | 1.37  | 1.19  | -1.04 | -1.51 | 0.19  | -0.52 |
| Q6UX04  | Spliceosome-associated protein CWC27 homolog                      | CWC27    | -0.99 | 2.25 | 2.21  | -1.03 | 0.14  | 0.38  | 0.39  | -1.08 | -0.22 | -1.19 | 0.14  | 0.26  |
| Q9BZK3  | Putative nascent polypeptide-associated complex subunit alpha-iii | NACA4P   | -0.99 | 0.55 | -1.40 | 0.74  | 0.36  | 0.56  | 0.44  | -1.44 | -1.44 | 0.50  | 0.72  | 0.96  |
| Q15144  | Actin-related protein 2/3 complex subunit 2                       | ARP2     | -1.00 | 0.69 | -1.46 | 0.24  | 0.40  | 0.51  | 1.15  | -1.46 | -1.29 | 0.83  | 0.63  | 0.44  |
| P02538  | Keratin, type II cytoskeletal 6A                                  | KRT6A    | -1.00 | 1.73 | 1.36  | -1.04 | 0.18  | 0.40  | 0.83  | -0.79 | -1.62 | 1.09  | 0.37  | -0.79 |
| Q9BWQ8  | Protein lifeguard 2                                               | FAIM2    | -1.00 | 1.11 | 1.10  | 1.56  | -0.96 | 0.40  | -0.86 | 0.80  | -0.78 | -1.16 | 0.63  | -0.75 |
| P19086  | Guanine nucleotide-binding protein G(z) subunit alpha             | GNAZ     | -1.00 | 2.70 | 0.40  | 1.60  | -0.12 | 0.46  | 0.00  | -0.85 | 0.36  | -2.15 | 0.67  | -0.37 |
| Q9ULV0  | Unconventional myosin-Vb                                          | MYO5B    | -1.00 | 0.92 | -0.30 | 0.22  | -0.12 | 0.50  | 0.81  | -0.63 | 1.38  | -2.32 | 0.53  | -0.07 |
| Q9Y6K9  | NF-kappa-B essential modulator                                    | IKBKG    | -1.00 | 0.88 | -0.92 | 0.22  | 1.66  | 0.47  | -0.39 | -1.72 | -0.88 | 0.91  | 0.67  | -0.03 |
| Q06546  | GA-binding protein alpha chain                                    | GABPA    | -1.00 | 1.38 | -0.08 | 0.84  | 0.69  | 0.10  | -0.03 | -0.41 | -2.59 | 0.22  | 0.41  | 0.85  |
| Q684P5  | Rap1 GTPase-activating protein 2                                  | RAP1GAP2 | -1.00 | 2.45 | -0.14 | 1.13  | -0.53 | 0.98  | 0.77  | -1.28 | -0.24 | -1.83 | 0.89  | 0.25  |
| Q8BNB7  | Retinol dehydrogenase 13                                          | RDH13    | -1.00 | 0.79 | -1.33 | 0.59  | 0.25  | 0.82  | 0.62  | -1.45 | -1.48 | 0.28  | 0.85  | 0.83  |
| Q15735  | Phosphatidylinositol 4,5-bisphosphate 5-phosphatase A             | INPP5J   | -1.00 | 1.21 | -0.39 | 1.29  | -0.75 | -0.59 | 1.78  | -0.48 | 1.18  | -0.92 | -0.58 | -0.53 |
| AS5YKK6 | CCR4-NOT transcription complex subunit 1                          | CNOT1    | -1.00 | 1.41 | 0.88  | 0.58  | 0.04  | 0.28  | -0.23 | -1.03 | -2.31 | 0.27  | 0.48  | 1.04  |
| Q76039  | Cyclin-dependent kinase-like 5                                    | CDKL5    | -1.00 | 1.12 | -0.03 | 0.21  | 0.19  | 0.82  | 0.11  | -0.58 | -2.59 | 0.70  | 0.53  | 0.64  |
| Q96HU8  | GTP-binding protein Di-Ras2                                       | DIRAS2   | -1.01 | 3.21 | 0.99  | 1.16  | -0.82 | 0.60  | 0.63  | -0.65 | 0.19  | -2.07 | 0.46  | -0.50 |
| Q9UF33  | Ephrin type-A receptor 6                                          | EPHA6    | -1.01 | 1.05 | -0.45 | 1.52  | -0.72 | 1.43  | -0.58 | -0.61 | -0.53 | -0.89 | 1.36  | -0.52 |
| Q9H6K5  | Proline-rich protein 36                                           | PRR36    | -1.01 | 0.93 | -0.28 | 1.02  | 0.39  | 0.73  | -0.77 | -2.28 | -0.35 | 0.51  | 0.04  | 1.00  |
| Q9NQX4  | Unconventional myosin-Vc                                          | MYO5C    | -1.01 | 1.03 | -1.21 | 0.41  | -0.03 | 1.54  | 0.47  | -0.09 | -1.33 | 0.46  | 1.07  | -1.28 |
| Q9C0E2  | Exportin-4                                                        | XPO4     | -1.01 | 0.82 | -0.54 | -0.69 | 2.11  | 0.82  | -0.70 | 0.62  | -0.70 | -0.88 | -0.70 | 0.67  |
| Q7LSN1  | COP9 signalosome complex subunit 6                                | COP56    | -1.01 | 0.59 | -1.71 | 0.86  | 0.37  | 0.63  | 0.59  | -0.49 | -1.80 | 0.17  | 0.75  | 0.63  |
| Q05823  | 2-5A-dependent ribonuclease                                       | RNASEL   | -1.01 | 2.61 | -0.20 | 1.58  | -0.58 | 2.09  | -0.49 | -0.16 | -0.45 | -0.99 | -0.45 | -0.36 |
| P62995  | Transformer-2 protein homolog beta                                | TRA2B    | -1.01 | 1.43 | -1.09 | 0.72  | 0.42  | 0.93  | 0.53  | -1.66 | -1.45 | 0.58  | 0.87  | 0.14  |
| O15400  | Syntaxin-7                                                        | STX7     | -1.01 | 2.46 | -0.30 | 1.83  | 0.40  | -0.64 | 0.90  | -0.79 | -1.24 | -0.01 | 0.94  | -1.08 |
| Q8WVR3  | Microtubule-associated protein 11                                 | MAP11    | -1.01 | 3.90 | 1.00  | 1.31  | -1.12 | 1.27  | 0.44  | 0.43  | -0.79 | -1.19 | -0.87 | -0.48 |
| P63010  | AP-2 complex subunit beta                                         | AP2B1    | -1.01 | 1.88 | -1.19 | 1.30  | 0.48  | 0.58  | 0.66  | -1.92 | -0.85 | -0.02 | 0.59  | 0.37  |
| Q9NZ09  | Ubiquitin-associated protein 1                                    | UBAP1    | -1.01 | 1.57 | -0.03 | 2.81  | -0.47 | -0.27 | -0.35 | -0.26 | -0.19 | -0.58 | -0.36 | -0.31 |
| Q5K651  | Sterile alpha motif domain-containing protein 9                   | SAMD9    | -1.01 | 1.68 | -0.57 | 0.82  | -0.89 | 0.87  | 1.46  | -0.64 | -0.69 | -1.03 | 1.37  | -0.70 |
| Q99501  | GAS2-like protein 1                                               | GAS2L1   | -1.02 | 2.27 | 0.23  | 0.06  | 0.62  | 0.41  | 0.87  | -0.42 | 0.54  | -0.91 | 0.94  | -2.34 |
| Q69YU3  | Ankyrin repeat domain-containing protein 34A                      | ANKRD34A | -1.02 | 1.44 | 0.22  | 0.43  | 0.40  | 1.03  | -0.53 | -1.60 | -1.45 | 0.96  | 1.15  | -0.60 |
| O60229  | Kalirin                                                           | KALRN    | -1.02 | 1.40 | 0.61  | 1.06  | -0.88 | 0.55  | 0.16  | -0.05 | 0.68  | -2.38 | 0.49  | -0.24 |
| Q96T60  | Bifunctional polynucleotide phosphatase/kinase                    | PNKP     | -1.02 | 1.18 | -0.11 | 0.54  | 1.16  | -0.28 | 0.02  | -0.99 | -2.14 | 1.07  | 0.76  | -0.04 |
| Q6P996  | Pyridoxal-dependent decarboxylase domain-containing protein 1     | PDXDC1   | -1.02 | 2.29 | -0.67 | 0.71  | 2.48  | 0.01  | -0.36 | -0.55 | -0.51 | -1.10 | -0.01 | 0.00  |
| Q7Z7M0  | Multiple epidermal growth factor-like domains protein 8           | MEGF8    | -1.02 | 2.04 | 1.28  | 1.45  | -0.45 | 0.44  | -0.80 | 0.40  | -1.50 | 0.41  | 0.05  | -1.28 |
| Q9Y5B0  | RNA polymerase II subunit A C-terminal domain phosphatase         | CTDP1    | -1.02 | 1.18 | 0.89  | 0.36  | -1.29 | 0.77  | 0.58  | 1.23  | -1.24 | -1.41 | 0.52  | -0.41 |
| Q86Y23  | Homerin                                                           | HRNR     | -1.02 | 3.45 | 0.42  | 1.94  | 0.02  | 0.47  | -0.19 | 0.19  | 0.29  | -1.97 | -0.36 | -0.81 |
| Q94812  | BAI1-associated protein 3                                         | BAIAP3   | -1.02 | 1.27 | 0.58  | 0.73  | -0.08 | 1.33  | -1.19 | 0.39  | -1.14 | -1.42 | 1.15  | -0.37 |
| Q92835  | Phosphatidylinositol 3,4,5-trisphosphate 5-phosphatase 1          | INPP5D   | -1.02 | 2.12 | -0.81 | 1.92  | 0.16  | 0.83  | -0.12 | -1.21 | -0.21 | -1.42 | 0.56  | 0.29  |
| Q9UJY4  | ADP-ribosylation factor-binding protein GGA2                      | GGA2     | -1.02 | 1.50 | 1.56  | -0.83 | -0.96 | 0.81  | 0.98  | -0.77 | -0.81 | -1.07 | 0.96  | 0.13  |
| Q96P50  | Arf-GAP with coiled-coil, ANK repeat and PH domain-containing p   | ACAP3    | -1.02 | 3.01 | 0.53  | 0.25  | -1.19 | 1.73  | 1.19  | -0.69 | -0.86 | -1.23 | 0.30  | -0.04 |
| Q8NE35  | Cytoplasmic polyadenylation element-binding protein 3             | CPEB3    | -1.02 | 1.72 | 0.64  | -0.50 | -0.76 | 1.02  | 1.31  | -1.21 | -0.62 | -1.37 | 0.47  | 1.01  |
| Q86TG7  | Retrotransposon-derived protein PEG10                             | PEG10    | -1.02 | 1.63 | 1.85  | -0.69 | -0.95 | 0.37  | 1.07  | 0.96  | -0.27 | -0.95 | -0.76 | -0.65 |
| Q86SX6  | Glutaredoxin-related protein 5, mitochondrial                     | GLRX5    | -1.02 | 1.80 | -0.04 | -0.32 | 2.81  | -0.24 | -0.33 | -0.34 | -0.31 | -0.63 | -0.42 | -0.18 |
| Q9Y5Q8  | General transcription factor 3C polypeptide 5                     | GTFC5C   | -1.02 | 1.79 | 1.20  | 0.36  | 1.43  | -0.15 | -1.08 | -0.16 | -1.00 | -1.32 | 1.13  | -0.42 |
| Q76081  | Regulator of G-protein signaling 20                               | RGS20    | -1.03 | 1.11 | -0.81 | 0.92  | -1.13 | 1.42  | 0.85  | 0.15  | -0.21 | -1.27 | 0.99  | -0.92 |
| P15056  | Serine/threonine-protein kinase B-raf                             | BRAF     | -1.03 | 2.21 | 1.32  | 0.40  | -0.80 | 0.82  | 0.31  | -0.32 | -0.81 | -2.06 | 0.46  | 0.68  |
| P10316  | HLA class I histocompatibility antigen, A-69 alpha chain          | HLA-A    | -1.03 | 2.70 | -0.88 | 1.73  | 0.44  | 0.80  | 0.22  | -1.02 | -1.43 | -0.87 | 0.62  | 0.38  |
| Q9UKJ3  | G patch domain-containing protein 8                               | GPATCH8  | -1.03 | 1.23 | -1.03 | 0.58  | 0.64  | 1.00  | 0.16  | -1.55 | -1.58 | 0.29  | 0.92  | 0.57  |
| Q9Y2Q0  | Phospholipid-transporting ATPase 1A                               | ATP8A1   | -1.03 | 1.64 | -0.10 | 1.42  | 0.09  | 0.28  | 0.01  | -1.19 | 1.47  | -1.82 | -0.06 | -0.10 |
| Q13177  | Serine/threonine-protein kinase PAK 2                             | PAK2     | -1.03 | 1.30 | 0.59  | 0.02  | 1.18  | -0.08 | -0.27 | 1.12  | -2.40 | 0.23  | -0.34 | -0.05 |
| P05129  | Protein kinase C gamma type                                       | PRKCG    | -1.03 | 1.58 | -0.41 | -0.28 | 2.12  | 0.19  | 0.00  | -1.71 | -0.62 | 0.87  | 0.17  | -0.33 |
| Q96EK4  | THAP domain-containing protein 11                                 | THAP11   | -1.03 | 2.38 | -0.09 | -0.23 | -0.61 | 0.60  | 2.56  | -0.10 | -0.16 | -0.79 | -0.21 | -0.97 |
| Q96JE9  | Microtubule-associated protein 6                                  | MAP6     | -1.03 | 3.12 | 1.39  | 1.49  | 0.54  | -0.24 | -0.66 | -1.27 | 0.76  | -1.22 | -0.58 | -0.21 |
| O94966  | Ubiquitin carboxyl-terminal hydrolase 19                          | USP19    | -1.03 | 2.88 | -0.18 | 1.76  | -0.05 | -0.24 | 1.10  | -0.21 | 0.32  | -2.04 | 0.07  | -0.53 |
| Q9Y4F5  | Centrosomal protein of 170 kDa protein B                          | CEP170B  | -1.03 | 2.98 | 0.63  | 0.94  | 1.07  | 0.43  | -0.56 | -1.34 | -0.38 | 0.96  | 0.05  | -1.79 |
| Q9Y217  | Myotubularin-related protein 6                                    | MTMR6    | -1.04 | 1.22 | 0.83  | 0.59  | -0.78 | 0.73  | -0.01 | 0.19  | 0.29  | -2.54 | 0.46  | 0.23  |
| P15056  | Eukaryotic translation initiation factor 4H                       | EIF4H    | -1.04 | 2.31 | 0.30  | 2.02  | -0.27 | 0.66  | -0.63 | -0.76 | -0.08 | -1.77 | 0.41  | 0.11  |
| P20264  | POU domain, class 3, transcription factor 3                       | POU3F3   | -1.04 | 1.40 | 0.03  | -0.62 | -0.74 | 1.29  | 1.53  | -0.66 | -0.56 | -1.00 | 1.38  | -0.64 |
| P13611  | Versican core protein                                             | VCAN     | -1.04 | 1.23 | -0.39 | -0.76 | 1.63  | 0.13  | 0.73  | -0.66 | -1.71 | 1.16  | 0.35  | -0.48 |
| Q8WUH6  | Transmembrane protein 263                                         | TMEM263  | -1.04 | 1.16 | -0.70 | -0.61 | -0.36 | 0.37  | 2.65  | -0.68 | -0.39 | -0.36 | 0.27  | -0.19 |
| Q9NP77  | RNA polymerase II subunit A C-terminal domain phosphatase SSI     | SSU72    | -1.04 | 2.31 | 0.70  | 0.09  | -0.88 | 1.33  | 0.85  | 0.03  | 0.46  | -2.13 | -0.65 | 0.19  |
| Q9H000  | Probable E3 ubiquitin-protein ligase makorin-2                    | MKRN2    | -1.04 | 1.54 | 0.77  | -0.62 | -1.05 | 0.97  | 1.52  | -0.28 | -0.97 | -1.35 | 0.91  | 0.09  |
| Q9Y6M7  | Sodium bicarbonate cotransporter 3                                | SLC4A7   | -1.04 | 2.35 | -0.92 | 1.03  | 0.15  | -0.29 | 2.22  | -0.99 | -1.01 | 0.06  | -0.22 | -0.03 |
| Q96RT7  | Gamma-tubulin complex component 6                                 | TUBGCP6  | -1.04 | 0.75 | 1.02  | -0.96 | 1.28  | -0.93 | 0.50  | 1.10  | -0.91 | 0.73  | -0.96 | -0.88 |
| Q6FI81  | Anamorsin                                                         | CIAPIN1  | -1.05 | 2.51 | -0.70 | -0.18 | 0.85  | 0.29  | 1.94  | -0.92 | -1.65 | 0.29  | -0.30 | 0.37  |
| P31321  | cAMP-dependent protein kinase type I-beta regulatory subunit      | PRKAR1B  | -1.05 | 1.59 | 0.38  | 1.77  | -1.03 | 0.53  | -0.03 | 0.05  | 0.06  | -2.08 | 0.20  | 0.14  |
| Q99259  | Glutamate decarboxylase 1                                         | GAD1     | -1.05 | 1.38 | 0.54  | 0.61  | 0.46  | -0.26 | 0.19  | -0.87 | 0.58  | -2.44 | 0.24  | 0.97  |
| Q9BZC1  | CUGBP Elav-like family member 4                                   | CELF4    | -1.05 | 0.66 | 1.02  | -1.14 | -1.22 | 0.99  | 1.18  | -0.52 | 0.20  | -1.35 | 0.81  | 0.04  |
| Q81YB3  | Serine/arginine repetitive matrix protein 1                       | SRRM1    | -1.05 | 2.13 | -1.18 | 0.72  | 0.45  | 0.62  | 1.37  | -1.87 | -0.95 | 0.33  | 0.28  | 0.23  |
| P11678  | Eosinophil peroxidase                                             | EPX      | -1.05 | 3.06 | 1.45  | 1.27  | -0.83 | 1.35  | -0.66 | -0.63 | -0.57 | -1.16 | 0.22  | -0.45 |
| Q969S2  | Endonuclease B-like 2                                             | NEIL2    | -1.05 | 2.33 | 2.16  | -0.53 | -0.70 | -0.18 | 1.49  | -0.47 | -0.33 | -0.85 | -0.06 | -0.52 |
| O60307  | Microtubule-associated serine/threonine-protein kinase 3          | MAST3    | -1.05 | 1.59 | -0.41 | 0.24  | 0.62  | 0.89  | 0.34  | -2.08 | -1.32 | 0.81  | 0.86  | 0.06  |
| Q6UUV7  | CREB-regulated transcription coactivator 3                        | CRTC3    | -1.05 | 2.89 | 1.84  | -0.40 | 1.88  | -0.23 | -0.51 | -0.30 | -0.28 | -0.96 | -0.53 | -0.51 |
| P36542  | ATP synthase subunit gamma, mitochondrial                         | ATP5F1C  | -1.05 | 2.04 | -0.19 | 0.42  | 1.64  | -0.18 | 0.27  | -0.32 | -2.13 | -0.76 | 0.58  | 0.68  |
| P10515  | Dihydropolyllysine-residue acetyltransferase component of pyruv   | DLAT     | -1.05 | 2.58 | 1.22  | 0.21  | 1.09  | 0.28  | -0.53 | -0.44 | 0.88  | -2.17 | -0.07 | -0.48 |
| P11498  | Pyruvate carboxylase, mitochondrial                               | PC       | -1.05 | 1.79 | -0.58 | -0.49 | 2.33  | 0.68  | -0.15 | -0.86 | 0.02  | -1.21 | 0.50  | -0.24 |
| A6NHQ2  | rRNA/tRNA 2'-O-methyltransferase fibrillar-like protein 1         | FBLL1    | -1.06 | 1.35 | -0.51 | -0.69 | -0.58 | 1.17  | 2.07  | -0.63 | -0.70 | -0.42 | 0.91  | -0.63 |
| Q2NKQ1  | Small G protein signaling modulator 1                             | SGSM1    | -1.06 | 1.18 | 0.54  | 1.27  | -1.14 | 0.57  | 0.07  | -0.53 | 1.14  | -1.95 | 0.22  | -0.19 |
| Q6VVB1  | E3 ubiquitin-protein ligase NHLRC1                                | NHLRC1   | -1.06 | 1.63 | 1.10  | -0.77 | -1.02 | 0.67  | 1.69  | 0.58  | -0.58 | -1.22 | 0.31  | -0.77 |
| Q8TEU7  | Rap guanine nucleotide exchange factor 6                          | RAPGEF6  | -1.06 | 1.68 | -0.09 | -0.34 | -0.42 | -0.18 | 2.81  | -0.29 | -0.18 | -0.69 | -0.29 | -0.33 |

|        |                                                                   |          |       |      |       |       |       |       |       |       |       |       |       |       |
|--------|-------------------------------------------------------------------|----------|-------|------|-------|-------|-------|-------|-------|-------|-------|-------|-------|-------|
| Q86UE4 | Protein LYRIC                                                     | MTDH     | -1.06 | 1.02 | -1.43 | 0.60  | 0.27  | 1.18  | 0.55  | -1.61 | -1.01 | -0.12 | 0.87  | 0.69  |
| O95198 | Kelch-like protein 2                                              | KLHL2    | -1.06 | 2.63 | -0.08 | 2.01  | -0.66 | 1.68  | -0.51 | -0.49 | -0.36 | -0.91 | -0.40 | -0.28 |
| Q96DA2 | Ras-related protein Rab-39B                                       | RAB39B   | -1.06 | 3.12 | 0.67  | 1.27  | -0.97 | 0.52  | 1.02  | -0.86 | -0.34 | -1.88 | 0.55  | 0.02  |
| Q9JG8  | Melanoma-associated antigen D4                                    | MAGED4   | -1.06 | 1.15 | 0.41  | 0.08  | -0.59 | 0.32  | 1.10  | -1.65 | -1.73 | 0.79  | 0.51  | 0.77  |
| P55196 | Afadin                                                            | AFDN     | -1.06 | 2.17 | -0.05 | 0.44  | 1.92  | -0.88 | 0.58  | -0.83 | -1.11 | 0.82  | 0.25  | -1.15 |
| Q9UQM7 | Calcium/calmodulin-dependent protein kinase type II subunit alpha | CAMK2A   | -1.06 | 3.25 | 0.99  | -0.20 | -0.61 | 0.91  | 1.48  | -1.06 | 0.23  | -1.72 | 0.46  | -0.48 |
| Q96JN2 | Coiled-coil domain-containing protein 136                         | CCDC136  | -1.06 | 1.50 | 0.19  | 0.66  | 0.47  | 0.34  | -0.02 | 0.31  | -2.77 | 0.54  | 0.36  | -0.07 |
| Q96G97 | Seipin                                                            | BSC12    | -1.06 | 5.39 | 1.05  | 0.08  | 1.14  | 0.79  | 0.41  | 0.43  | -0.48 | -1.32 | -0.21 | -1.89 |
| Q9NQX5 | Neural proliferation differentiation and control protein 1        | NPDC1    | -1.06 | 1.16 | -0.75 | 1.55  | 1.10  | 0.32  | -0.91 | -0.80 | 0.89  | -1.12 | 0.64  | -0.90 |
| O95299 | NADH dehydrogenase [ubiquinone] 1 alpha subcomplex subunit 10     | NDUFA10  | -1.07 | 2.05 | 1.22  | -0.48 | 1.87  | -0.57 | -0.09 | -0.85 | 0.50  | -1.36 | -0.66 | 0.43  |
| Q81XK0 | Polyhomeotic-like protein 2                                       | PHC2     | -1.07 | 1.49 | 0.33  | -0.15 | 0.64  | -0.11 | 0.91  | -1.02 | 0.93  | -2.08 | 1.08  | -0.51 |
| P42658 | Dipeptidyl aminopeptidase-like protein 6                          | DPP6     | -1.07 | 1.33 | 0.44  | 0.53  | -0.52 | 0.23  | 0.79  | -1.95 | 1.59  | 0.14  | -0.16 | -1.09 |
| Q96EP0 | E3 ubiquitin-protein ligase RNF31                                 | RNF31    | -1.07 | 1.18 | 0.81  | 0.52  | -1.53 | 0.85  | 0.66  | 0.23  | -1.07 | -1.62 | 0.75  | 0.41  |
| Q81YM9 | E3 ubiquitin-protein ligase TRIM22                                | TRIM22   | -1.07 | 2.02 | -0.42 | 0.51  | -0.91 | 1.33  | 1.41  | -0.61 | -0.61 | -1.12 | 1.18  | -0.76 |
| P08240 | Signal recognition particle receptor subunit alpha                | SRPRA    | -1.07 | 1.29 | -1.12 | 0.94  | 0.09  | 0.89  | 0.60  | 0.03  | 0.34  | -2.32 | 0.44  | 0.10  |
| Q9UBP0 | Spastin                                                           | SPAST    | -1.07 | 0.58 | -1.29 | 0.01  | 0.51  | 0.13  | 1.38  | -1.28 | -1.29 | 1.30  | 0.35  | 0.19  |
| P22087 | rRNA 2'-O-methyltransferase fibrillarin                           | FBL      | -1.07 | 1.47 | 0.42  | 0.30  | -1.15 | 0.90  | 1.07  | -0.53 | -2.09 | 0.40  | 0.80  | -0.13 |
| O75347 | Tubulin-specific chaperone A                                      | TBCA     | -1.07 | 0.97 | -0.51 | 0.98  | -0.71 | -0.58 | 1.94  | -0.60 | -0.65 | 1.30  | -0.58 | -0.59 |
| Q8NHF8 | RalBP1-associated Eps domain-containing protein 2                 | REPS2    | -1.08 | 2.52 | 1.58  | 1.34  | -0.27 | 0.04  | -0.47 | 0.64  | -0.11 | -1.87 | -0.20 | -0.68 |
| Q8TDC3 | Serine/threonine-protein kinase BRSK1                             | BRSK1    | -1.08 | 2.28 | 0.62  | 0.91  | -1.06 | 0.86  | 0.75  | 0.17  | 0.11  | -2.02 | 0.60  | -0.93 |
| Q86XP3 | ATP-dependent RNA helicase DDX42                                  | DDX42    | -1.08 | 1.56 | 0.93  | 0.44  | -0.19 | -0.05 | 0.52  | 0.15  | -0.05 | -2.67 | 0.37  | 0.54  |
| P30876 | DNA-directed RNA polymerase II subunit RPB2                       | POLR2B   | -1.08 | 2.13 | 0.89  | 0.00  | -1.21 | 1.22  | 1.09  | 1.02  | -1.36 | -0.70 | -0.14 | -0.81 |
| Q9Y5Q9 | General transcription factor 3C polypeptide 3                     | GTFC3    | -1.08 | 1.03 | -1.44 | 0.70  | 0.67  | 0.73  | 0.52  | -1.36 | -1.51 | 0.34  | 0.76  | 0.60  |
| P42704 | Leucine-rich PPR motif-containing protein, mitochondrial          | LRPPRC   | -1.08 | 1.22 | -0.73 | 0.80  | -0.60 | 0.59  | 0.10  | -2.53 | 0.19  | -0.17 | 0.63  | 0.51  |
| Q96DZ5 | CAP-Gly domain-containing linker protein 3                        | CLIP3    | -1.08 | 1.57 | 0.91  | 0.65  | -1.00 | 1.11  | -0.05 | -1.51 | -1.52 | 0.05  | 0.60  | 0.76  |
| Q12979 | Active breakpoint cluster region-related protein                  | ABR      | -1.08 | 3.12 | 0.90  | 0.96  | -1.09 | 1.03  | 0.71  | -0.28 | -0.43 | -1.85 | 0.67  | -0.62 |
| P56545 | C-terminal-binding protein 2                                      | CTBP2    | -1.08 | 0.65 | -1.00 | 0.04  | 0.52  | 0.41  | 0.85  | -1.54 | -1.58 | 1.14  | 0.59  | 0.58  |
| Q3YEC7 | Rab-like protein 6                                                | RABL6    | -1.08 | 1.43 | -1.23 | 0.47  | 0.96  | 0.77  | 0.55  | -1.32 | -1.64 | 0.62  | 0.80  | 0.03  |
| O43432 | Eukaryotic translation initiation factor 4 gamma 3                | EIF4G3   | -1.09 | 1.29 | 1.11  | 0.60  | -0.13 | -0.04 | -0.11 | 0.72  | 0.78  | -0.09 | -0.38 | -2.47 |
| Q9Y3A3 | MOB-like protein phocin                                           | MOB4     | -1.09 | 2.02 | 2.09  | 0.15  | -0.02 | 0.03  | -0.33 | -0.40 | 0.30  | -1.92 | -0.47 | 0.58  |
| P09496 | Clathrin light chain A                                            | CLTA     | -1.09 | 1.55 | -0.93 | 0.87  | -0.22 | -0.15 | 2.05  | -0.94 | -0.89 | 0.82  | 0.24  | -0.83 |
| Q9H357 | Tyrosine-protein phosphatase non-receptor type 23                 | PTPN23   | -1.09 | 3.57 | -0.28 | 1.28  | 1.03  | 0.72  | 0.01  | -2.20 | -0.83 | -0.06 | 0.41  | -0.08 |
| P49916 | DNA ligase 3                                                      | LIG3     | -1.09 | 2.10 | 1.29  | 1.71  | -1.44 | 0.51  | -0.04 | 0.02  | -1.25 | -0.70 | 0.08  | -0.17 |
| O60493 | Sorting nexin-3                                                   | SNX3     | -1.09 | 3.02 | 1.46  | 0.58  | -0.68 | 0.70  | 0.42  | -0.18 | -1.22 | -1.88 | 0.55  | 0.24  |
| Q6ZTN6 | Ankyrin repeat domain-containing protein 13D                      | ANKRD13D | -1.09 | 1.20 | 0.84  | 0.61  | -1.65 | 0.66  | 0.87  | 0.90  | -1.52 | -0.75 | 0.43  | -0.38 |
| P16854 | Deoxyguanosine kinase, mitochondrial                              | DGUOK    | -1.09 | 1.28 | -0.51 | -0.56 | 1.32  | -0.59 | 1.75  | -0.57 | -0.52 | -0.93 | -0.58 | 1.21  |
| P05060 | Secretogranin-1                                                   | CHGB     | -1.09 | 3.21 | 0.94  | 0.69  | 0.98  | -0.38 | 0.40  | 0.34  | -2.04 | -0.41 | -1.21 | 0.67  |
| P19827 | Inter-alpha-trypsin inhibitor heavy chain H1                      | ITIH1    | -1.10 | 2.28 | -0.71 | -0.14 | 1.05  | 0.87  | 1.02  | -1.51 | -1.57 | 0.33  | 0.83  | -0.17 |
| Q9H2G2 | STE20-like serine/threonine-protein kinase                        | SLK      | -1.10 | 1.14 | 0.84  | 0.74  | 0.42  | 0.02  | -0.72 | 0.66  | 0.53  | -2.49 | -0.28 | 0.27  |
| Q14BN4 | Sarcolemmal membrane-associated protein                           | SLMAP    | -1.10 | 2.05 | -0.02 | 1.44  | -1.43 | 0.48  | 1.50  | -0.82 | -0.15 | -1.02 | 0.58  | -0.58 |
| Q9UQL6 | Histone deacetylase 5                                             | HDAC5    | -1.10 | 1.61 | -0.68 | 0.40  | 0.01  | 1.29  | 0.64  | -1.77 | -1.33 | -0.12 | 1.08  | 0.47  |
| O96000 | NADH dehydrogenase [ubiquinone] 1 beta subcomplex subunit 10      | NDUF10   | -1.10 | 1.79 | 0.29  | 1.45  | -1.31 | 0.55  | 0.80  | -0.23 | 0.05  | -1.42 | -1.10 | 0.94  |
| Q9H582 | Zinc finger protein 644                                           | ZNF644   | -1.10 | 1.61 | -0.89 | 0.49  | 0.99  | 0.28  | 0.79  | -2.23 | -0.62 | 0.72  | 0.62  | -0.14 |
| Q5VTU8 | ATP synthase subunit epsilon-like protein, mitochondrial          | ATP5F1P2 | -1.10 | 1.59 | -0.94 | 0.64  | 0.99  | 0.96  | -0.01 | -1.07 | -1.09 | -1.30 | 1.19  | 0.62  |
| Q8N9B5 | Junction-mediating and -regulatory protein                        | JMY      | -1.10 | 1.40 | -0.71 | 1.21  | -0.65 | 0.90  | 0.74  | -0.81 | 0.87  | -1.80 | 0.67  | -0.42 |
| Q9UHB6 | LIM domain and actin-binding protein 1                            | LIMA1    | -1.10 | 1.77 | -1.22 | 1.13  | 0.54  | 0.74  | 0.56  | -1.46 | -1.30 | -0.45 | 0.70  | 0.76  |
| P43155 | Carnitine O-acetyltransferase                                     | CRAT     | -1.10 | 1.28 | 0.22  | 0.25  | 1.95  | 0.41  | -1.43 | -0.64 | -1.19 | 0.80  | 0.21  | -0.57 |
| Q8NH99 | Atlastin-2                                                        | ATL2     | -1.10 | 1.53 | 0.38  | 1.35  | -0.28 | 0.46  | -0.30 | -0.26 | 0.41  | -2.48 | 0.35  | 0.37  |
| Q9Y496 | Kinesin-like protein KIF3A                                        | KIF3A    | -1.11 | 1.92 | -0.84 | 1.10  | 0.38  | 0.59  | 0.64  | -1.81 | -1.45 | 0.36  | 0.23  | 0.78  |
| Q8WUH1 | Protein Churchill                                                 | CHURC1   | -1.11 | 1.20 | 0.45  | 0.18  | 1.17  | -1.25 | 0.78  | 0.59  | 0.17  | -1.51 | -1.38 | 0.82  |
| P51572 | B-cell receptor-associated protein 31                             | B-CAPI1  | -1.11 | 1.71 | -0.04 | 1.01  | 0.56  | -1.23 | 1.41  | 0.16  | 0.71  | -1.29 | 0.10  | -1.39 |
| Q9NNW5 | WD repeat-containing protein 6                                    | WDR6     | -1.11 | 2.45 | 0.06  | -0.54 | -0.73 | 1.84  | 1.62  | -0.58 | -0.64 | -0.90 | 0.49  | -0.62 |
| Q14839 | Chromodomain-helicase-DNA-binding protein 4                       | CHD4     | -1.11 | 1.00 | 0.38  | -1.11 | 0.69  | 0.25  | 0.95  | -0.36 | -2.19 | 1.03  | 0.45  | -0.10 |
| Q9Y383 | Putative RNA-binding protein Luc7-like 2                          | LUC7L2   | -1.11 | 3.61 | 1.14  | -0.91 | 0.30  | 0.63  | 1.57  | -0.07 | -1.37 | -1.39 | 0.23  | -0.14 |
| Q93015 | N-alpha-acetyltransferase 80                                      | NAA80    | -1.11 | 1.40 | -0.17 | 2.82  | -0.48 | -0.27 | -0.35 | -0.27 | -0.32 | -0.59 | -0.26 | -0.23 |
| Q9UJ04 | Testis-specific Y-encoded-like protein 4                          | TSPYL4   | -1.11 | 1.98 | 0.18  | 0.59  | -1.32 | 0.86  | 1.58  | 0.90  | -0.74 | -0.95 | 0.07  | -1.18 |
| Q8N6D5 | Ankyrin repeat domain-containing protein 29                       | ANKRD29  | -1.11 | 2.37 | -0.25 | 0.49  | 0.98  | 0.89  | 0.09  | -0.07 | -2.56 | -0.19 | 0.56  | 0.05  |
| Q14244 | Enscosin                                                          | MAP7     | -1.11 | 3.21 | 1.57  | 0.38  | 0.30  | 0.38  | -0.01 | -0.31 | -0.66 | -2.31 | 0.18  | 0.49  |
| Q9UPQ9 | Trinucleotide repeat-containing gene 6B protein                   | TNRC6B   | -1.11 | 3.03 | 2.28  | 0.79  | -0.70 | -0.58 | 0.87  | -0.40 | -0.47 | -0.87 | -0.49 | -0.44 |
| Q15084 | Protein disulfide-isomerase A6                                    | PDI6A    | -1.12 | 1.95 | -0.14 | -0.25 | 2.80  | -0.14 | -0.29 | -0.33 | -0.31 | -0.76 | -0.35 | -0.23 |
| Q9NP64 | Nucleolar protein of 40 kDa                                       | ZCCHC17  | -1.12 | 1.20 | -0.84 | 0.42  | 0.94  | 0.51  | 0.32  | -0.80 | -2.25 | 0.89  | 0.27  | 0.56  |
| P43246 | DNA mismatch repair protein Msh2                                  | MSH2     | -1.12 | 1.98 | 0.36  | 1.12  | -0.95 | 0.78  | 0.60  | -0.38 | 0.26  | -2.25 | 0.66  | -0.20 |
| Q9NXH9 | tRNA (guanine(26)-N(2))-dimethyltransferase                       | TRMT1    | -1.12 | 1.64 | 1.34  | -0.47 | -0.70 | -0.48 | 2.00  | -0.49 | 0.80  | -0.83 | -0.60 | -0.58 |
| P67870 | Casein kinase II subunit beta                                     | CSNK2B   | -1.12 | 2.56 | 1.33  | 0.77  | -0.38 | -0.25 | 0.79  | -2.14 | 0.72  | -0.54 | -0.60 | 0.30  |
| P18505 | Gamma-aminobutyric acid receptor subunit beta-1                   | GABRB1   | -1.12 | 3.23 | 1.38  | -1.08 | 0.43  | 0.81  | 1.03  | 0.58  | -0.77 | -1.02 | 0.08  | -1.44 |
| Q99574 | Neuroserpin                                                       | SERPINI1 | -1.12 | 2.53 | -0.13 | 0.84  | 2.58  | -0.38 | -0.52 | -0.45 | -0.43 | -0.73 | -0.35 | -0.42 |
| Q96R05 | Retinoid-binding protein 7                                        | RBP7     | -1.12 | 1.24 | -0.83 | 0.82  | -0.53 | 1.10  | 0.79  | -0.96 | -0.99 | -1.25 | 1.35  | 0.50  |
| Q72456 | Kinesin-like protein KIF21A                                       | KIF21A   | -1.12 | 2.18 | 1.30  | 0.79  | -0.91 | 0.79  | 0.05  | 0.68  | -0.30 | -1.92 | 0.42  | -0.91 |
| Q9UHD9 | Ubiquitin-2                                                       | UBQLN2   | -1.12 | 1.24 | 0.77  | 0.84  | -0.16 | 0.36  | -0.42 | 0.23  | 0.65  | -2.60 | 0.33  | 0.00  |
| P45985 | Dual specificity mitogen-activated protein kinase kinase 4        | MAP2K4   | -1.12 | 1.80 | -0.03 | 1.66  | -0.37 | 0.66  | -0.13 | -0.13 | -0.01 | -2.30 | 0.60  | 0.05  |
| O60831 | PRA1 family protein 2                                             | PRAF2    | -1.12 | 3.01 | -0.18 | -0.02 | 0.34  | 0.34  | 1.98  | -1.32 | 0.05  | -1.71 | 0.32  | 0.19  |
| P23435 | Cerebellin-1                                                      | CBLN1    | -1.12 | 1.09 | 1.69  | -0.81 | -0.94 | 0.39  | 0.91  | 1.16  | -0.72 | -1.04 | -0.81 | 0.17  |
| P98077 | SHC-transforming protein 2                                        | SHC2     | -1.13 | 2.20 | 0.97  | 2.54  | -0.50 | -0.43 | -0.41 | -0.34 | -0.34 | -0.69 | -0.37 | -0.43 |
| Q9BXB5 | Oxysterol-binding protein-related protein 10                      | OSBP10   | -1.13 | 1.38 | 0.62  | 0.56  | -0.80 | 0.37  | 0.74  | -0.31 | 1.37  | -2.21 | -0.02 | -0.32 |
| Q9NKR7 | BRISC and BRCA1-A complex member 2                                | BABAM2   | -1.13 | 1.64 | 0.61  | -0.52 | 0.87  | 0.33  | 0.42  | -1.45 | -0.51 | -1.73 | 1.04  | 0.94  |
| P67775 | Serine/threonine-protein phosphatase 2A catalytic subunit alpha   | PPP2CA   | -1.13 | 3.32 | 0.93  | 1.20  | -0.46 | 0.88  | 0.10  | -1.74 | 0.48  | -1.37 | 0.54  | -0.56 |
| Q5XUX1 | F-box/WD repeat-containing protein 9                              | FBXW9    | -1.13 | 1.94 | -0.59 | 1.68  | 0.70  | -0.68 | 0.75  | -0.63 | -0.73 | -1.13 | 1.29  | -0.68 |
| Q96IZ7 | Serine/Arginine-related protein 53                                | RSRC1    | -1.13 | 2.26 | 0.58  | -1.01 | 0.14  | 0.37  | 2.00  | -0.01 | -1.02 | 0.82  | -0.99 | -0.88 |
| Q14964 | Ras-related protein Rab-39A                                       | RAB39A   | -1.13 | 1.43 | 1.01  | 1.53  | -1.04 | 0.80  | -0.79 | -0.77 | -0.88 | -1.08 | 0.68  | 0.54  |
| Q86VP3 | Phosphofurin acidic cluster sorting protein 2                     | PACS2    | -1.13 | 2.21 | -0.09 | 0.68  | 0.31  | 1.29  | 0.84  | -1.17 | -1.52 | -0.42 | 1.02  | 0.04  |
| P23677 | Inositol-trisphosphate 3-kinase A                                 | ITPKA    | -1.13 | 2.61 | -1.09 | 1.23  | 0.23  | 0.85  | 0.11  | -1.62 | 0.64  | -1.85 | 0.48  | 0.02  |
| Q9NQC3 | Reticulon-4                                                       | RTN4     | -1.13 | 3.85 | 0.09  | 1.65  | 0.27  | 1.14  | -0.33 | -0.54 | -1.47 | -1.36 | 0.69  | -0.15 |
| Q7L3S4 | Zinc finger protein 771                                           | ZNF771   | -1.13 | 1.37 | -1.47 | 1.24  | -0.02 | 0.70  | 1.02  | -0.31 | -1.61 | -0.68 | 0.52  | 0.60  |

|        |                                                                          |           |       |      |       |       |       |       |       |       |       |       |       |       |
|--------|--------------------------------------------------------------------------|-----------|-------|------|-------|-------|-------|-------|-------|-------|-------|-------|-------|-------|
| O00151 | PDZ and LIM domain protein 1                                             | PDLIM1    | -1.13 | 1.56 | -0.13 | 2.82  | -0.36 | -0.32 | -0.33 | -0.22 | -0.26 | -0.63 | -0.30 | -0.29 |
| P42858 | Huntingtin                                                               | HTT       | -1.13 | 1.83 | 0.40  | 1.00  | 0.28  | 0.24  | -0.05 | -0.27 | 0.01  | -2.64 | 0.28  | 0.75  |
| P41217 | OX-2 membrane glycoprotein                                               | CD200     | -1.14 | 2.05 | 0.85  | 2.57  | -0.53 | -0.31 | -0.53 | -0.32 | -0.37 | -0.76 | -0.32 | -0.30 |
| Q16864 | V-type proton ATPase subunit F                                           | ATP6V1F   | -1.14 | 1.15 | 0.80  | 0.88  | -1.29 | -0.61 | 1.50  | -1.09 | -1.12 | 0.88  | -0.14 | 0.19  |
| O60711 | Leupaxin                                                                 | LPXN      | -1.14 | 2.34 | 0.00  | 0.92  | -1.04 | 0.90  | 1.33  | -1.12 | -0.81 | -1.17 | -0.11 | 1.10  |
| Q13526 | Peptidyl-prolyl cis-trans isomerase NIMA-interacting 1                   | PIN1      | -1.14 | 3.20 | 0.88  | 1.66  | -0.43 | 0.59  | -0.14 | -0.37 | -0.16 | -2.14 | 0.35  | -0.23 |
| Q723B1 | Neuronal growth regulator 1                                              | NEGR1     | -1.14 | 1.81 | 0.27  | 1.76  | -0.78 | 0.27  | 0.26  | -0.31 | -1.94 | 0.88  | 0.21  | -0.62 |
| Q9HCJ6 | Synaptic vesicle membrane protein VAT-1 homolog-like                     | VAT1L     | -1.14 | 2.07 | -0.71 | -0.46 | 1.76  | 0.07  | 1.30  | -1.64 | -0.68 | 0.49  | 0.16  | -0.29 |
| Q9NYV4 | Cyclin-dependent kinase 12                                               | CDK12     | -1.15 | 1.26 | 0.69  | -0.69 | -0.80 | 0.19  | 1.98  | -0.67 | 1.20  | -1.02 | -0.23 | -0.66 |
| P49840 | Glycogen synthase kinase-3 alpha                                         | GSK3A     | -1.15 | 1.35 | -1.11 | 0.36  | 0.26  | 1.06  | 0.88  | -1.68 | -1.16 | -0.16 | 1.14  | 0.41  |
| Q14C86 | GTPase-activating protein and VPS9 domain-containing protein 1           | GAPVD1    | -1.15 | 1.28 | -0.66 | 0.70  | 0.62  | 0.57  | 0.19  | -1.19 | -2.04 | 0.07  | 0.56  | 1.18  |
| Q14566 | DNA replication licensing factor MCM6                                    | MCM6      | -1.15 | 2.00 | 0.36  | -0.18 | -1.15 | 1.94  | 0.95  | 0.65  | -0.23 | -1.17 | -0.97 | -0.21 |
| Q96BH1 | E3 ubiquitin-protein ligase RNF25                                        | RNF25     | -1.15 | 1.70 | 1.47  | 2.00  | -0.69 | -0.49 | -0.54 | 0.60  | -0.58 | -0.84 | -0.46 | -0.48 |
| Q8N163 | Cell cycle and apoptosis regulator protein 2                             | CCAR2     | -1.15 | 1.32 | -0.59 | -0.12 | 1.03  | 0.32  | 0.81  | -1.04 | -2.10 | 1.04  | 0.38  | 0.28  |
| Q12873 | Chromodomain-helicase-DNA-binding protein 3                              | CHD3      | -1.16 | 1.44 | 0.96  | 0.18  | 0.56  | -0.55 | 0.41  | 0.99  | 0.78  | -1.78 | -1.58 | 0.04  |
| O95822 | Malonyl-CoA decarboxylase, mitochondrial                                 | MLYCD     | -1.16 | 2.04 | 0.68  | 1.03  | 1.15  | 0.07  | -1.00 | -1.04 | -0.96 | -1.42 | 0.65  | 0.84  |
| Q14149 | MORC family CW-type zinc finger protein 3                                | MORC3     | -1.16 | 0.98 | 1.64  | -1.09 | -0.53 | 0.38  | 0.75  | 1.48  | -0.63 | -0.65 | -0.31 | -1.02 |
| Q13330 | Metastasis-associated protein MTA1                                       | MTA1      | -1.16 | 1.50 | 0.83  | 1.32  | -1.28 | 0.88  | -0.19 | 0.74  | -1.14 | -1.23 | -0.58 | 0.65  |
| Q8IVN3 | Musculoskeletal embryonic nuclear protein 1                              | MUSTN1    | -1.16 | 1.58 | -0.18 | -0.23 | -0.42 | -0.28 | 2.83  | -0.23 | -0.32 | -0.56 | -0.31 | -0.29 |
| Q96NX5 | Calcium/calmodulin-dependent protein kinase type 1G                      | CAMK1G    | -1.16 | 2.08 | 2.05  | 0.61  | -0.89 | 0.85  | -0.63 | -0.63 | -0.63 | -0.89 | 0.75  | -0.59 |
| Q9UMF0 | Intercellular adhesion molecule 5                                        | ICAM5     | -1.16 | 1.84 | 0.03  | 1.47  | 0.05  | 0.88  | -0.62 | -1.47 | -0.76 | 1.47  | -0.85 | -0.19 |
| Q9H936 | Mitochondrial glutamate carrier 1                                        | SLC25A22  | -1.16 | 1.03 | -1.55 | 0.70  | 0.42  | 0.83  | 0.79  | -0.72 | -1.82 | 0.08  | 0.62  | 0.65  |
| Q96T17 | MAP7 domain-containing protein 2                                         | MAP7D2    | -1.16 | 1.02 | -1.00 | 0.70  | 0.56  | 0.60  | 0.33  | -1.99 | -1.18 | 0.48  | 0.68  | 0.82  |
| P46459 | Vesicle-fusing ATPase                                                    | NSF       | -1.17 | 1.89 | 0.18  | 1.43  | -0.26 | 0.57  | -0.05 | 1.06  | -0.39 | -2.19 | 0.28  | -0.62 |
| Q6YP21 | Kynurenine--oxoglutarate transaminase 3                                  | KYAT3     | -1.17 | 2.54 | 0.39  | 1.37  | 0.61  | -0.38 | 0.30  | -1.98 | 0.74  | 0.17  | 0.15  | -1.35 |
| Q13332 | Receptor-type tyrosine-protein phosphatase S                             | PTPRS     | -1.17 | 2.19 | -0.11 | 1.79  | 0.69  | 0.81  | -1.14 | -0.97 | -0.47 | -1.35 | 0.61  | 0.14  |
| O95218 | Zinc finger Ran-binding domain-containing protein 2                      | ZRANB2    | -1.17 | 1.81 | -0.63 | 0.84  | 0.12  | 0.52  | 0.96  | -2.20 | -1.03 | 0.27  | 0.42  | 0.72  |
| Q14671 | Pumilio homolog 1                                                        | PUM1      | -1.17 | 1.97 | 0.00  | -0.78 | 2.07  | 0.18  | 0.42  | -1.54 | -1.07 | 0.53  | 0.27  | -0.08 |
| P32780 | General transcription factor IIH subunit 1                               | GTTF2H1   | -1.17 | 1.73 | -0.73 | 0.93  | 1.60  | 0.85  | -0.92 | -0.95 | -0.87 | 0.83  | 0.27  | -1.02 |
| Q53H96 | Pyroline-5-carboxylate reductase 3                                       | PYCR3     | -1.17 | 1.62 | -0.56 | -0.69 | 0.06  | 1.14  | 1.69  | -1.11 | -0.64 | 0.12  | 1.08  | -1.11 |
| O43739 | Cytohesin-3                                                              | CYTH3     | -1.17 | 2.65 | -0.24 | 2.13  | -0.61 | -0.38 | 1.53  | -0.37 | -0.37 | -1.00 | -0.38 | -0.32 |
| Q6ZVD8 | PH domain leucine-rich repeat-containing protein phosphatase 2           | PHLPP2    | -1.17 | 1.61 | 0.96  | 0.40  | -1.20 | 0.68  | 0.81  | -1.04 | 1.14  | -1.29 | 0.55  | -0.99 |
| Q9NZC9 | SWI/SNF-related matrix-associated actin-dependent regulator of cSMARCA11 | SMARCA11  | -1.17 | 1.73 | 2.14  | -0.71 | -0.86 | 0.41  | 0.78  | 0.69  | -0.63 | -1.07 | -0.12 | -0.61 |
| Q8IW50 | PHD finger protein 6                                                     | PHF6      | -1.18 | 2.41 | 1.61  | -0.50 | -0.66 | 0.33  | 1.38  | 0.30  | -1.80 | -0.60 | 0.09  | -0.15 |
| Q96P47 | Arf-GAP with GTPase, ANK repeat and PH domain-containing prot            | AGAP3     | -1.18 | 3.40 | 1.24  | 0.67  | -0.40 | 0.66  | 0.54  | -0.16 | 0.56  | -2.00 | 0.21  | -1.33 |
| O95319 | CUGBP Elav-like family member 2                                          | CELF2     | -1.18 | 2.35 | 0.99  | -0.78 | -0.59 | 0.88  | 1.62  | -1.46 | -0.36 | -0.94 | 0.71  | -0.07 |
| Q9BWF3 | RNA-binding protein 4                                                    | RBM4      | -1.18 | 1.20 | 1.01  | -0.23 | -1.01 | 0.65  | 0.91  | 0.40  | 0.09  | -2.32 | 0.31  | 0.20  |
| Q9H723 | Protein NRDE2 homolog                                                    | NRDE2     | -1.18 | 0.93 | -1.38 | 0.17  | 0.34  | 1.08  | 0.86  | -1.37 | -1.40 | 0.18  | 0.91  | 0.60  |
| Q9P265 | Disco-interacting protein 2 homolog B                                    | DIP2B     | -1.18 | 5.26 | -0.37 | 0.92  | 1.05  | 0.84  | 0.91  | -1.84 | -0.82 | -0.79 | 0.64  | -0.54 |
| Q49A26 | Putative oxidoreductase GLYR1                                            | GLYR1     | -1.18 | 1.91 | 0.18  | 0.35  | 0.69  | 0.20  | 0.55  | -0.40 | -2.66 | 0.72  | 0.52  | -0.14 |
| Q96J01 | THO complex subunit 3                                                    | THOC3     | -1.18 | 2.01 | 0.83  | 0.30  | -0.74 | 0.68  | 0.87  | -1.22 | -0.87 | -1.53 | 1.32  | 0.34  |
| Q6P2E9 | Enhancer of mRNA-decapping protein 4                                     | EDC4      | -1.19 | 1.14 | 0.28  | 1.16  | 0.73  | -0.40 | -0.47 | 0.28  | 0.93  | -2.17 | 0.53  | -0.86 |
| Q9NWB6 | Arginine and glutamate-rich protein 1                                    | ARGLU1    | -1.19 | 1.06 | 0.00  | 0.02  | 0.40  | 0.33  | 0.50  | -2.69 | -0.24 | 0.95  | 0.39  | 0.34  |
| Q2TAK8 | PWWP domain-containing DNA repair factor 3A                              | PWWP3A    | -1.19 | 1.45 | 0.62  | 0.94  | -0.22 | 0.56  | -0.34 | -1.53 | 0.13  | -1.80 | 0.43  | 1.21  |
| Q96DH6 | RNA-binding protein Musashi homolog 2                                    | MSI2      | -1.19 | 1.88 | 0.46  | 0.29  | -0.56 | 0.76  | 0.93  | -0.41 | -2.26 | -0.72 | 0.71  | 0.81  |
| Q9HCK8 | Chromodomain-helicase-DNA-binding protein 8                              | CHD8      | -1.19 | 1.56 | 1.46  | -0.34 | -1.00 | 0.57  | 0.92  | 1.14  | -0.93 | -1.29 | 0.30  | -0.83 |
| O00192 | Armadillo repeat protein deleted in velo-cardio-facial syndrome          | ARVCF     | -1.19 | 1.50 | 0.90  | 1.28  | -1.36 | 0.60  | 0.13  | -0.34 | -1.16 | -1.39 | 0.53  | 0.80  |
| P42166 | Lamina-associated polypeptide 2, isoform alpha                           | TMPO      | -1.19 | 1.91 | -0.90 | 1.02  | 1.02  | 0.50  | 0.22  | -1.35 | -1.80 | 0.09  | 0.67  | 0.53  |
| Q9Y5A9 | YTH domain-containing family protein 2                                   | YTHDF2    | -1.19 | 1.90 | 1.04  | -0.21 | -0.68 | 0.47  | 1.23  | -0.05 | 0.48  | -2.26 | 0.40  | -0.42 |
| P33402 | Guanylate cyclase soluble subunit alpha-2                                | GUICY1A2  | -1.19 | 2.60 | 0.83  | 0.31  | -0.09 | 0.80  | 0.52  | -0.34 | -0.95 | -2.23 | 0.01  | 1.14  |
| Q15139 | Serine/threonine-protein kinase D1                                       | PRKD1     | -1.19 | 1.79 | -0.57 | 1.29  | 0.08  | 0.66  | 0.33  | 0.12  | -2.32 | -0.65 | 0.35  | 0.71  |
| Q9UII2 | ATPase inhibitor, mitochondrial                                          | ATP5IF1   | -1.20 | 2.00 | 0.57  | -1.30 | 0.12  | 0.54  | 2.01  | -1.11 | -0.45 | 0.42  | 0.20  | -1.01 |
| Q13574 | Diacylglycerol kinase zeta                                               | DGKZ      | -1.20 | 1.23 | 1.61  | -0.01 | -0.47 | 0.44  | -0.21 | 1.12  | 0.13  | -0.69 | 0.14  | -2.05 |
| Q9BX40 | Protein LSM14 homolog B                                                  | LSM14B    | -1.20 | 0.81 | 1.25  | -0.29 | -0.90 | 0.23  | 0.68  | -0.79 | 1.90  | -1.04 | -0.26 | -0.80 |
| Q9UPT8 | Zinc finger CCCH domain-containing protein 4                             | ZC3H4     | -1.20 | 2.35 | -0.11 | 0.75  | -0.53 | -0.45 | 2.60  | -0.34 | -0.42 | -0.76 | -0.29 | -0.46 |
| P67809 | Nuclease-sensitive element-binding protein 1                             | YBX1      | -1.20 | 1.99 | -0.52 | 0.66  | 1.73  | -0.46 | 0.48  | -0.14 | -1.28 | -1.58 | 0.71  | 0.40  |
| Q9BVC5 | Ashwin                                                                   | C2orf49   | -1.20 | 2.98 | 0.83  | 0.64  | -1.08 | 0.60  | 1.46  | -0.34 | -0.95 | -1.28 | 0.94  | -0.82 |
| P43007 | Neutral amino acid transporter A                                         | SLC1A4    | -1.20 | 2.17 | -0.45 | 1.68  | -0.56 | -0.57 | 2.03  | -0.51 | -0.62 | 0.05  | -0.63 | -0.42 |
| Q8WY36 | HMG box transcription factor BBX                                         | BBX       | -1.20 | 2.01 | -0.64 | 1.09  | -0.98 | 0.78  | 1.67  | -0.03 | -0.78 | -1.18 | 0.74  | -0.68 |
| Q9UM54 | Pre-mRNA-processing factor 19                                            | PRPF19    | -1.20 | 2.46 | 0.00  | 0.14  | 2.00  | 0.37  | -0.33 | -1.05 | -1.72 | -0.41 | 0.46  | 0.54  |
| Q9BXM9 | FSD1-like protein                                                        | FSD1L     | -1.20 | 1.97 | 1.57  | 0.47  | -0.42 | 0.35  | -0.06 | 0.69  | -0.38 | -2.32 | 0.06  | 0.05  |
| Q00536 | Cyclin-dependent kinase 16                                               | CDK16     | -1.21 | 2.89 | 0.26  | -0.17 | 1.66  | 0.94  | -0.28 | -1.20 | -1.14 | -0.52 | 1.24  | -0.79 |
| O43390 | Heterogeneous nuclear ribonucleoprotein R                                | HNRNPR    | -1.21 | 1.88 | -0.43 | -0.10 | 1.44  | 0.65  | 0.29  | -1.25 | -1.87 | 0.59  | 0.89  | -0.22 |
| Q96J02 | E3 ubiquitin-protein ligase Itchy homolog                                | ITCH      | -1.21 | 1.76 | 0.20  | 1.30  | -0.19 | 0.31  | 0.17  | -0.14 | 0.09  | -2.58 | 0.56  | 0.28  |
| Q8WXA9 | Splicing regulatory glutamine/lysine-rich protein 1                      | SREK1     | -1.21 | 1.73 | -1.08 | 1.06  | -0.18 | 0.81  | 1.12  | -1.73 | -0.94 | -0.31 | 0.69  | 0.56  |
| O95819 | Mitogen-activated protein kinase kinase kinase 4                         | MAP4K4    | -1.21 | 1.67 | -0.03 | 0.79  | -0.29 | 0.92  | 0.35  | -0.40 | -2.46 | -0.24 | 0.89  | 0.49  |
| Q8N3C0 | Activating signal integrator 1 complex subunit 3                         | ASCC3     | -1.21 | 1.54 | 0.01  | 1.51  | -1.33 | 0.78  | 0.63  | -0.24 | -1.08 | -1.43 | 0.62  | 0.53  |
| Q6NV74 | Uncharacterized protein KIAA1211-like                                    | KIAA1211L | -1.21 | 2.17 | 0.83  | 1.35  | -0.77 | 0.23  | 0.40  | -0.45 | 1.18  | -1.88 | -0.16 | -0.72 |
| P63027 | Vesicle-associated membrane protein 2                                    | VAMP2     | -1.21 | 2.55 | 0.65  | 1.86  | -0.12 | -0.10 | -0.06 | -1.14 | 0.97  | -1.66 | -0.10 | -0.30 |
| Q00975 | Voltage-dependent N-type calcium channel subunit alpha-1B                | CACNA1B   | -1.21 | 1.54 | -0.42 | 1.99  | -0.74 | -0.58 | 1.38  | -0.56 | -0.58 | -0.77 | 0.77  | -0.48 |
| Q9NUB1 | Acetyl-coenzyme A synthetase 2-like, mitochondrial                       | ACSS1     | -1.21 | 1.67 | 0.57  | -0.68 | 0.61  | 0.30  | 0.92  | 1.37  | 0.61  | -1.46 | -1.08 | -1.17 |
| Q9Y4H2 | Insulin receptor substrate 2                                             | IRS2      | -1.22 | 2.35 | -0.51 | -0.41 | 0.48  | 1.09  | 1.47  | -1.94 | -0.50 | -0.40 | 0.89  | -0.17 |
| Q9NYB0 | Telomeric repeat-binding factor 2-interacting protein 1                  | TERF2IP   | -1.22 | 3.64 | 1.27  | -0.75 | 0.69  | 1.18  | 0.36  | 0.56  | -0.47 | -1.95 | -0.22 | -0.67 |
| O75689 | Arf-GAP with dual PH domain-containing protein 1                         | ADAP1     | -1.22 | 3.66 | 0.27  | 0.83  | 0.61  | 1.20  | -0.04 | -0.61 | -0.12 | -2.07 | 0.90  | -0.97 |
| Q13596 | Sorting nexin-1                                                          | SNX1      | -1.22 | 0.94 | -1.05 | 0.15  | 1.51  | 0.51  | -0.02 | -1.72 | -1.15 | 0.65  | 0.64  | 0.48  |
| Q6P6B7 | Ankyrin repeat domain-containing protein 16                              | ANKRD16   | -1.22 | 1.57 | 1.26  | -0.96 | -1.02 | 1.12  | 1.23  | 0.37  | 0.26  | -1.24 | -0.97 | -0.04 |
| P29558 | RNA-binding motif, single-stranded-interacting protein 1                 | RBMS1     | -1.22 | 1.10 | 2.04  | -0.53 | -0.71 | -0.57 | 1.02  | -0.50 | -0.56 | -0.75 | -0.56 | 1.12  |
| Q72417 | Nuclear fragile X mental retardation-interacting protein 2               | NUFIP2    | -1.22 | 1.14 | -1.42 | 0.59  | 0.69  | 0.64  | 0.78  | -1.23 | -1.63 | 0.22  | 0.69  | 0.67  |
| Q9Y5X0 | Sorting nexin-10                                                         | SNX10     | -1.22 | 2.29 | 2.46  | -0.45 | -0.55 | 1.07  | -0.32 | -0.31 | -0.30 | -0.84 | -0.43 | -0.34 |
| P53365 | Arfapin-2                                                                | ARFIP2    | -1.23 | 1.92 | 0.53  | 0.19  | -1.08 | 1.23  | 0.98  | -0.54 | 0.46  | -1.90 | 0.74  | -0.62 |
| Q9BZ95 | Histone-lysine N-methyltransferase NSD3                                  | NSD3      | -1.23 | 1.82 | 1.22  | 1.01  | -1.51 | 0.09  | 0.99  | 0.01  | -1.44 | -0.97 | 0.43  | 0.17  |
| Q08378 | Golgin subfamily A member 3                                              | GOLGA3    | -1.23 | 4.23 | 1.07  | 0.21  | 1.42  | 0.47  | -0.16 | -0.60 | -1.15 | 0.44  | 0.21  | -1.91 |
| O14734 | Acyl-coenzyme A thioesterase 8                                           | ACOT8     | -1.23 | 2.06 | 0.61  | 0.31  | 0.91  | -0.45 | 0.63  | -0.40 | 0.83  | -2.47 | 0.29  | -0.26 |



|        |                                                                          |          |       |      |       |       |       |       |       |       |       |       |       |       |
|--------|--------------------------------------------------------------------------|----------|-------|------|-------|-------|-------|-------|-------|-------|-------|-------|-------|-------|
| PODPH8 | Tubulin alpha-3D chain                                                   | TUBA3D   | -1.23 | 1.48 | 1.09  | -0.01 | 0.14  | 0.71  | -0.35 | 0.45  | -2.56 | -0.20 | 0.58  | 0.15  |
| Q15276 | Rab GTPase-binding effector protein 1                                    | RABEP1   | -1.23 | 2.00 | -0.84 | 1.53  | -0.19 | 1.10  | 0.31  | -0.96 | -1.46 | -0.82 | 0.74  | 0.59  |
| Q9UPN9 | E3 ubiquitin-protein ligase TRIM33                                       | TRIM33   | -1.23 | 1.84 | 0.63  | -0.92 | 0.26  | 0.54  | 1.30  | -1.16 | -1.89 | 0.05  | 0.77  | 0.42  |
| P04049 | RAF proto-oncogene serine/threonine-protein kinase                       | RAF1     | -1.23 | 2.92 | 0.26  | 0.85  | -0.34 | 1.00  | 0.72  | -2.26 | -0.09 | -0.97 | 0.70  | 0.13  |
| P28472 | Gamma-aminobutyric acid receptor subunit beta-3                          | GABRB3   | -1.23 | 2.46 | 0.34  | 1.04  | -0.82 | 1.02  | 0.62  | -2.12 | -0.03 | -0.17 | 0.83  | -0.70 |
| Q8NI36 | WD repeat-containing protein 36                                          | WDR36    | -1.23 | 2.67 | 1.79  | -0.32 | -0.57 | 1.96  | -0.39 | -0.42 | -0.33 | -0.83 | -0.45 | -0.44 |
| Q14192 | Four and a half LIM domains protein 2                                    | FHL2     | -1.24 | 1.66 | -1.41 | 0.99  | 0.67  | 0.70  | 0.72  | -1.24 | -1.39 | -0.42 | 0.59  | 0.78  |
| Q8NFX7 | Syntaxin-binding protein 6                                               | STXBP6   | -1.24 | 3.23 | 0.65  | 0.32  | 0.53  | 0.84  | 0.45  | -0.17 | -0.97 | -2.32 | 0.93  | -0.26 |
| Q96124 | Far upstream element-binding protein 3                                   | FUBP3    | -1.24 | 2.21 | -0.64 | 0.70  | 0.62  | 0.68  | 0.72  | -1.08 | -2.09 | -0.27 | 1.00  | 0.34  |
| O60885 | Bromodomain-containing protein 4                                         | BRD4     | -1.24 | 2.21 | 0.85  | -0.56 | -0.68 | 2.43  | 0.09  | -0.55 | -0.49 | -0.91 | -0.41 | 0.23  |
| Q12800 | Alpha-globin transcription factor CP2                                    | TFCP2    | -1.24 | 2.42 | -0.34 | 0.68  | -0.07 | 1.27  | 0.66  | -0.29 | -1.13 | -2.03 | 0.84  | 0.42  |
| Q9Y314 | Nitric oxide synthase-interacting protein                                | NOSIP    | -1.24 | 2.08 | 0.63  | 0.43  | -0.56 | 0.66  | 0.86  | 0.09  | -2.55 | -0.28 | 0.52  | 0.22  |
| Q8TEQ6 | Gem-associated protein 5                                                 | GEMIN5   | -1.24 | 1.30 | -0.90 | -0.15 | 1.89  | 0.40  | 0.17  | -1.65 | -0.99 | 0.59  | 0.59  | 0.06  |
| Q06587 | E3 ubiquitin-protein ligase RING1                                        | RING1    | -1.24 | 2.72 | 1.19  | -0.69 | 0.87  | 0.68  | 0.30  | -0.09 | -2.26 | -0.50 | 0.65  | -0.14 |
| Q8NE62 | Choline dehydrogenase, mitochondrial                                     | CHDH     | -1.25 | 2.82 | 0.60  | -0.88 | 0.28  | 0.45  | 1.92  | -0.80 | -0.66 | -1.18 | 0.97  | -0.70 |
| Q7RTP6 | [F-actin]-monooxygenase MICAL3                                           | MICAL3   | -1.25 | 1.35 | -0.57 | 0.19  | 0.52  | 0.56  | 0.79  | -2.06 | -1.22 | 1.20  | 0.49  | 0.11  |
| Q9Y218 | WD repeat-containing protein 37                                          | WDR37    | -1.25 | 5.54 | -0.45 | 1.51  | 0.34  | 0.68  | 1.29  | -1.11 | -0.46 | -1.18 | 0.48  | -1.10 |
| Q96PE3 | Inositol polyphosphate-4-phosphatase type I A                            | INPP4A   | -1.25 | 1.41 | 1.03  | 0.52  | 0.17  | 0.05  | -0.23 | 0.65  | 0.59  | -2.60 | 0.10  | -0.28 |
| Q9UJU3 | Zinc finger protein 112                                                  | ZNF112   | -1.25 | 1.47 | 1.32  | -0.94 | -1.07 | 1.15  | 1.09  | 0.68  | -0.92 | 0.31  | -0.83 | -0.79 |
| P49591 | Serine--tRNA ligase, cytoplasmic                                         | SARS     | -1.25 | 1.57 | 0.04  | 0.59  | 0.72  | 0.43  | -0.10 | -0.38 | -2.63 | 0.38  | 0.83  | 0.11  |
| Q68DU8 | BTB/POZ domain-containing protein KCTD16                                 | KCTD16   | -1.25 | 2.63 | 0.19  | 1.73  | 0.01  | 0.63  | -0.26 | -0.06 | -2.16 | -0.76 | 0.46  | 0.23  |
| Q9Y426 | C2 domain-containing protein 2                                           | C2CD2    | -1.25 | 1.97 | 0.70  | 1.44  | -0.61 | 0.79  | -0.43 | 0.52  | -1.30 | -1.70 | -0.06 | 0.65  |
| Q6ZUM4 | Rho GTPase-activating protein 27                                         | ARHGAP27 | -1.25 | 1.80 | -0.39 | 0.31  | 2.38  | -0.60 | 0.10  | -0.50 | -0.64 | -0.97 | -0.57 | 0.88  |
| Q76176 | Protein phosphatase Slingshot homolog 2                                  | SSH2     | -1.25 | 3.51 | 1.06  | 1.40  | -0.85 | 0.81  | 0.27  | -1.31 | -0.66 | -0.02 | 0.67  | -1.37 |
| O00483 | Cytochrome c oxidase subunit NDUFA4                                      | NDUFA4   | -1.25 | 0.71 | -1.38 | 0.68  | 0.31  | 0.71  | 0.55  | -1.45 | -1.47 | 0.59  | 0.79  | 0.67  |
| O94772 | Lymphocyte antigen 6H                                                    | LY6H     | -1.25 | 2.21 | 0.03  | 1.57  | -0.22 | 0.69  | -0.02 | -2.44 | 0.07  | 0.16  | 0.14  | 0.02  |
| Q5H9R7 | Serine/threonine-protein phosphatase 6 regulatory subunit 3              | PPP6R3   | -1.25 | 1.59 | 0.57  | 0.81  | -1.44 | 0.91  | 0.79  | 0.03  | -1.24 | -1.51 | 0.76  | 0.34  |
| Q9NPF5 | DNA methyltransferase 1-associated protein 1                             | DMAP1    | -1.25 | 1.77 | 1.19  | -0.10 | -0.93 | 0.54  | 1.04  | 0.89  | -1.70 | -0.88 | 0.62  | -0.69 |
| Q9NWW8 | BRISC and BRCA1-A complex member 1                                       | BABAM1   | -1.25 | 1.94 | 1.28  | 1.46  | -0.33 | 0.47  | -1.01 | -1.23 | 0.83  | -0.30 | 0.09  | -1.26 |
| Q96PX6 | Coiled-coil domain-containing protein 85A                                | CCDC85A  | -1.25 | 3.04 | 0.14  | 1.90  | -0.95 | 0.38  | 1.04  | -0.70 | -0.78 | -1.10 | 0.72  | -0.65 |
| Q6P158 | Putative ATP-dependent RNA helicase DHX57                                | DHX57    | -1.25 | 2.03 | 1.34  | -0.22 | 0.03  | 0.53  | 0.28  | -0.85 | 1.00  | -2.19 | 0.38  | -0.31 |
| Q8WUQ7 | Cactin                                                                   | CACTIN   | -1.25 | 1.18 | -0.35 | 0.59  | -1.09 | 0.71  | 1.44  | -0.95 | 1.20  | -1.31 | 0.46  | -0.70 |
| Q71RC2 | La-related protein 4                                                     | LARP4    | -1.25 | 3.22 | 0.50  | 0.44  | -0.96 | 0.52  | 2.12  | -0.74 | -0.65 | -1.13 | -0.60 | 0.50  |
| P53804 | E3 ubiquitin-protein ligase TTC3                                         | TTC3     | -1.26 | 2.29 | -0.66 | 1.56  | 1.29  | 0.70  | -0.79 | -0.65 | -0.67 | -1.07 | 0.95  | -0.66 |
| P69891 | Hemoglobin subunit gamma-1                                               | HGB1     | -1.26 | 1.35 | -0.12 | 0.43  | 0.56  | 0.43  | 0.22  | -0.89 | -2.34 | 1.21  | 0.70  | -0.19 |
| Q9NCQ7 | Ubiquitin carboxyl-terminal hydrolase CYLD                               | CYLD     | -1.26 | 3.65 | -0.04 | 0.91  | 0.47  | 1.02  | 0.54  | -1.19 | 0.27  | -2.16 | 0.56  | -0.37 |
| P09497 | Clathrin light chain B                                                   | CLTB     | -1.26 | 1.32 | -1.07 | 1.46  | -0.75 | -0.13 | 1.94  | -0.78 | 0.36  | 0.08  | -0.47 | -0.64 |
| Q9UHV9 | Prefoldin subunit 2                                                      | PFND2    | -1.26 | 1.94 | 0.46  | 0.51  | -0.12 | 0.14  | 0.95  | -1.43 | -2.13 | 0.69  | 0.19  | 0.73  |
| P05452 | Tetranectin                                                              | CLEC3B   | -1.26 | 3.00 | -0.13 | -0.33 | 2.41  | 1.11  | -0.42 | -0.49 | -0.33 | -0.96 | -0.38 | -0.47 |
| O15294 | UDP-N-acetylglucosamine--peptide N-acetylglucosaminyltransferase         | OGT      | -1.26 | 5.52 | 0.66  | 1.32  | -0.06 | 1.02  | 0.51  | -1.02 | -0.70 | -1.73 | 0.70  | -0.70 |
| Q14376 | UDP-glucose 4-epimerase                                                  | GALE     | -1.26 | 2.55 | 2.32  | -0.54 | 0.47  | -0.51 | 0.55  | -0.67 | -0.60 | -1.01 | -0.60 | 0.59  |
| P31040 | Succinate dehydrogenase [ubiquinone] flavoprotein subunit, mitochondrial | SDHA     | -1.26 | 1.34 | -0.81 | 0.21  | 1.58  | 1.34  | -0.88 | -0.31 | -0.93 | -1.09 | 1.03  | -0.14 |
| B01IT2 | Unconventional myosin-Ig                                                 | MYO1G    | -1.26 | 2.52 | 0.88  | 2.30  | 0.65  | -0.69 | -0.78 | -0.71 | -0.58 | -0.21 | -0.71 | -0.15 |
| Q9NRL3 | Striatin-4                                                               | STRN4    | -1.26 | 2.72 | 0.64  | 0.42  | 1.14  | 0.26  | -0.03 | 0.16  | 0.15  | -2.62 | -0.33 | 0.21  |
| P33992 | DNA replication licensing factor MCM5                                    | MCM5     | -1.26 | 2.49 | 1.81  | -0.59 | -0.80 | 0.92  | 0.88  | -0.59 | -0.72 | -1.05 | 0.82  | -0.68 |
| Q9BPX5 | Actin-related protein 2/3 complex subunit 5-like protein                 | ARPC5L   | -1.26 | 1.97 | 0.29  | 1.43  | -0.59 | 0.22  | 0.56  | -2.31 | 0.56  | -0.65 | 0.23  | 0.26  |
| P09914 | Interferon-induced protein with tetratricopeptide repeats 1              | IFIT1    | -1.27 | 2.41 | 0.50  | 1.21  | -0.33 | 0.29  | 0.54  | 0.61  | -2.36 | -0.80 | 0.43  | -0.09 |
| Q6ULP2 | Aftiphilin                                                               | AFTPH    | -1.27 | 1.15 | -0.52 | 0.31  | 0.62  | 0.68  | 0.23  | -2.30 | -0.97 | 0.77  | 0.89  | 0.30  |
| Q9Y484 | WD repeat domain phosphoinositide-interacting protein 4                  | WDR45    | -1.27 | 2.19 | -0.24 | 0.47  | 1.60  | 0.36  | -0.15 | -1.58 | -1.61 | 0.48  | -0.16 | 0.82  |
| Q9NS69 | Mitochondrial import receptor subunit TOM22 homolog                      | TOMM22   | -1.27 | 1.34 | 2.11  | -0.52 | -0.64 | -0.57 | 1.08  | -0.51 | -0.52 | -0.78 | -0.59 | 0.94  |
| Q9Y2H1 | Serine/threonine-protein kinase 38-like                                  | STK38L   | -1.28 | 2.11 | -0.58 | -0.60 | 0.46  | 0.30  | 2.47  | -0.92 | -0.88 | -0.06 | 0.25  | -0.45 |
| Q9C0C7 | Activating molecule in BECN1-regulated autophagy protein 1               | AMBRA1   | -1.28 | 1.78 | 0.87  | -1.39 | 0.51  | 0.43  | 1.33  | 0.41  | 0.07  | -1.68 | -0.96 | 0.39  |
| P62166 | Neuronal calcium sensor 1                                                | NCS1     | -1.28 | 1.38 | 1.85  | -0.13 | -0.82 | -0.70 | 1.28  | 1.01  | -0.72 | -0.91 | -0.29 | -0.57 |
| Q9UQR1 | Zinc finger protein 148                                                  | ZNF148   | -1.28 | 1.12 | -0.41 | -0.93 | 1.09  | -0.59 | 2.12  | 0.11  | -0.09 | 0.50  | -0.71 | -1.09 |
| P07477 | Trypsin-1                                                                | PRSS1    | -1.28 | 1.72 | -0.75 | -0.63 | 0.60  | 0.08  | 2.49  | -0.76 | -0.79 | 0.22  | -0.01 | -0.44 |
| Q96SB3 | Neurabin-2                                                               | PPP1R9B  | -1.28 | 2.52 | 0.59  | 1.26  | -0.23 | 0.44  | 0.24  | 0.30  | 0.68  | -2.10 | 0.16  | -1.33 |
| Q969R2 | Oxysterol-binding protein 2                                              | OSBP2    | -1.28 | 4.68 | -0.37 | 1.76  | 0.14  | 0.20  | 1.43  | -1.39 | -1.28 | -0.02 | -0.27 | -0.21 |
| Q9HBZ2 | Aryl hydrocarbon receptor nuclear translocator 2                         | ARNT2    | -1.29 | 1.84 | -0.48 | -0.16 | -0.70 | 1.38  | 1.78  | -0.66 | -0.67 | -0.95 | 1.04  | -0.57 |
| Q9BRG1 | Vacuolar protein-sorting-associated protein 25                           | VPS25    | -1.29 | 2.58 | -0.21 | 2.08  | -0.66 | -0.43 | 1.62  | -0.33 | -0.31 | -0.86 | -0.46 | -0.44 |
| Q96RQ3 | Methylcrotonoyl-CoA carboxylase subunit alpha, mitochondrial             | MCCC1    | -1.29 | 2.16 | -0.65 | 0.16  | 0.64  | 0.92  | 0.98  | -1.99 | -1.13 | -0.27 | 0.90  | 0.46  |
| O75044 | SLIT-ROBO Rho GTPase-activating protein 2                                | SRGAP2   | -1.29 | 2.83 | -0.18 | 1.59  | -0.57 | 0.74  | 0.80  | -0.14 | -0.52 | -2.05 | 0.61  | -0.29 |
| Q2KHT3 | Protein CLEC16A                                                          | CLEC16A  | -1.29 | 0.59 | -1.32 | -0.10 | 0.57  | 0.61  | 0.98  | -1.41 | -1.39 | 1.01  | 0.73  | 0.32  |
| O75064 | DENN domain-containing protein 48                                        | DENN4D8  | -1.29 | 2.13 | 0.44  | 2.05  | -0.96 | 0.66  | -0.19 | 0.26  | -0.82 | -1.23 | 0.57  | -0.78 |
| Q13469 | Nuclear factor of activated T-cells, cytoplasmic 2                       | NFATC2   | -1.29 | 1.67 | -1.21 | 0.95  | 1.10  | 0.31  | 0.54  | -1.37 | -1.61 | 0.45  | 0.31  | 0.54  |
| Q96K17 | Transcription factor BTF3 homolog 4                                      | BTF3L4   | -1.30 | 2.38 | 0.02  | 0.25  | 1.82  | -0.20 | 0.26  | -0.60 | 0.33  | -1.81 | -0.97 | 0.90  |
| Q5THJ4 | Vacuolar protein sorting-associated protein 13D                          | VPS13D   | -1.30 | 2.33 | 0.45  | 0.73  | 0.57  | 0.35  | 0.14  | 0.64  | -2.46 | -1.07 | 0.37  | 0.27  |
| Q9UPT9 | Ubiquitin carboxyl-terminal hydrolase 22                                 | USP22    | -1.30 | 2.39 | -0.21 | 0.31  | -0.82 | 0.95  | 1.92  | -1.08 | -0.58 | -0.95 | 0.97  | -0.51 |
| Q92529 | SHC-transforming protein 3                                               | SHC3     | -1.30 | 1.70 | 0.61  | 0.17  | 1.10  | -0.09 | -0.03 | 1.80  | -0.86 | -1.33 | -0.11 | -1.26 |
| Q70YC5 | Protein ZNF365                                                           | ZNF365   | -1.30 | 2.94 | 0.69  | 0.43  | -0.33 | 0.62  | 1.10  | 0.87  | -0.07 | -2.29 | -0.71 | -0.32 |
| O15197 | Ephrin type-B receptor 6                                                 | EPHB6    | -1.30 | 1.79 | 0.22  | 0.61  | -0.16 | 0.38  | 0.80  | -1.12 | -2.32 | 0.33  | 0.28  | 0.98  |
| P20290 | Transcription factor BTF3                                                | BTF3     | -1.30 | 1.64 | -0.15 | 0.17  | 1.73  | -0.49 | 0.40  | -1.12 | -0.37 | 0.22  | -1.61 | 1.22  |
| O95057 | GTP-binding protein Di-Ras1                                              | DIRAS1   | -1.30 | 2.90 | 0.51  | 0.73  | -0.56 | 1.31  | 0.46  | -0.29 | -0.64 | -2.19 | 0.82  | -0.15 |
| P08631 | Tyrosine-protein kinase HCK                                              | HCK      | -1.30 | 2.31 | -0.17 | 1.03  | -0.49 | 0.47  | 1.29  | -0.57 | -0.33 | -2.20 | 0.58  | 0.41  |
| Q61Q55 | Tau-tubulin kinase 2                                                     | TTBK2    | -1.31 | 2.15 | 1.59  | 1.82  | -0.90 | -0.79 | 0.37  | 0.04  | -0.86 | 0.02  | -0.61 | -0.69 |
| Q726L1 | Tectonin beta-propeller repeat-containing protein 1                      | TECPR1   | -1.31 | 1.51 | 1.48  | 1.29  | -0.41 | -0.41 | -0.39 | 0.92  | -0.38 | -1.47 | -0.19 | -1.20 |
| Q20539 | Histone H1.1                                                             | HIST1H1A | -1.31 | 1.54 | -0.45 | 0.70  | 2.15  | -0.12 | -0.67 | -0.61 | -0.64 | -0.89 | 1.13  | -0.59 |
| P30414 | NK-tumor recognition protein                                             | NKTR     | -1.31 | 1.34 | -1.33 | 1.12  | 0.33  | 0.54  | 0.78  | -1.47 | -1.40 | 0.54  | 0.74  | 0.16  |
| O15327 | Inositol polyphosphate 4-phosphatase type II                             | INPP4B   | -1.31 | 2.93 | -0.38 | 2.03  | 0.75  | 0.78  | -0.73 | -0.55 | -0.69 | -1.12 | -0.75 | 0.65  |
| Q81VT5 | Kinase suppressor of Ras 1                                               | KSR1     | -1.31 | 1.67 | 1.26  | 1.12  | -1.25 | 0.73  | -0.17 | 0.67  | -1.11 | -1.33 | 0.59  | -0.49 |
| O95721 | Synaptosomal-associated protein 29                                       | SNAP29   | -1.31 | 2.21 | -0.33 | 1.63  | 0.64  | 0.08  | 0.02  | -0.38 | 0.69  | -2.25 | -0.28 | 0.16  |
| P25686 | DnaJ homolog subfamily B member 2                                        | DNAJB2   | -1.31 | 4.22 | 0.18  | 1.54  | 0.68  | 0.50  | 0.13  | -0.82 | 0.15  | -2.25 | 0.17  | -0.30 |
| O75143 | Autophagy-related protein 13                                             | ATG13    | -1.31 | 2.32 | 0.32  | 1.68  | -0.94 | 1.20  | -0.15 | -0.67 | -0.62 | -1.11 | 1.04  | -0.74 |
| O60573 | Eukaryotic translation initiation factor 4E type 2                       | EIF4E2   | -1.31 | 3.38 | 1.14  | -0.25 | 0.07  | 1.12  | 0.61  | -1.06 | -1.34 | -1.50 | 0.85  | 0.36  |

|            |                                                               |           |       |      |       |       |       |       |       |       |       |       |       |       |
|------------|---------------------------------------------------------------|-----------|-------|------|-------|-------|-------|-------|-------|-------|-------|-------|-------|-------|
| P18583     | Protein SON                                                   | SON       | -1.32 | 1.46 | 0.50  | 0.55  | -1.57 | 0.86  | 1.20  | -0.40 | -1.41 | -0.92 | 0.85  | 0.34  |
| Q8TD47     | 40S ribosomal protein S4, Y isoform 2                         | RPS4Y2    | -1.32 | 2.92 | -0.17 | -0.42 | 2.31  | 1.32  | -0.43 | -0.44 | -0.42 | -0.85 | -0.44 | -0.46 |
| A1X283     | SH3 and PX domain-containing protein 2B                       | SH3PXD2B  | -1.32 | 1.55 | 0.40  | 0.98  | 1.12  | 0.35  | -1.24 | -1.07 | 1.20  | -1.46 | 0.21  | -0.48 |
| Q8N4X5     | Actin filament-associated protein 1-like 2                    | AFAP1L2   | -1.32 | 3.74 | 0.89  | 0.35  | -0.37 | 1.06  | 0.92  | 0.25  | 0.30  | -1.93 | -0.02 | -1.45 |
| Q9NRU3     | Metal transporter CNNM1                                       | CNNM1     | -1.32 | 2.67 | 0.43  | 0.76  | -0.30 | 0.88  | 0.62  | 0.55  | -0.40 | -1.58 | 0.86  | -1.81 |
| Q8IV38     | Ankyrin repeat and MYND domain-containing protein 2           | ANKMY2    | -1.32 | 2.09 | -0.52 | 0.30  | 0.31  | 0.40  | 1.51  | -1.54 | -1.76 | 0.48  | 0.61  | 0.21  |
| Q5T6F2     | Ubiquitin-associated protein 2                                | UBAP2     | -1.32 | 2.75 | 0.72  | 1.66  | 0.04  | 0.79  | -0.88 | 0.95  | -0.14 | -1.33 | -0.94 | -0.88 |
| O95405     | Zinc finger FYVE domain-containing protein 9                  | ZFYV9     | -1.32 | 1.21 | 1.26  | 0.10  | -1.04 | 0.42  | 0.59  | 1.43  | -0.98 | -1.20 | 0.47  | -1.06 |
| Q15418     | Ribosomal protein S6 kinase alpha-1                           | RPS6KA1   | -1.32 | 1.42 | 1.23  | 0.01  | -0.24 | 0.52  | 0.01  | 1.01  | -1.53 | -1.82 | 0.11  | 0.70  |
| O60684     | Importin subunit alpha-7                                      | KPNA6     | -1.33 | 2.30 | -0.81 | 0.02  | 0.04  | 0.42  | 2.51  | -0.93 | -0.72 | -0.39 | 0.33  | -0.46 |
| Q9BW91     | ADP-ribose pyrophosphatase, mitochondrial                     | NUDT9     | -1.33 | 2.40 | -0.05 | 1.07  | -0.17 | 0.06  | 1.27  | 1.07  | -0.04 | -1.64 | -1.54 | -0.04 |
| P01871     | Immunoglobulin heavy constant mu                              | IGHM      | -1.33 | 1.22 | -0.12 | 1.06  | 0.33  | 0.64  | -0.55 | -0.61 | -2.36 | 0.19  | 0.57  | 0.85  |
| O43759     | Synaptogyrin-1                                                | SYNGR1    | -1.33 | 1.76 | 0.94  | 1.83  | -1.08 | 0.05  | 0.01  | -1.45 | 0.10  | -1.10 | 0.46  | 0.24  |
| Q9Y4E6     | WD repeat-containing protein 7                                | WDR7      | -1.33 | 3.03 | 0.51  | 1.71  | -0.30 | 0.36  | 0.22  | -0.43 | 0.30  | -2.21 | 0.36  | -0.51 |
| Q8N6T3     | ADP-ribosylation factor GTPase-activating protein 1           | ARFGAP1   | -1.33 | 2.90 | 0.67  | 1.76  | -0.50 | 0.43  | 0.06  | -0.98 | 0.61  | -1.89 | 0.14  | -0.30 |
| Q50586     | Ubiquitin-protein ligase E3A                                  | UBE3A     | -1.33 | 3.49 | 0.34  | 1.62  | -0.31 | 1.22  | -0.18 | -0.67 | -1.55 | -1.21 | 0.52  | 0.22  |
| Q15942     | Zyxin                                                         | ZYX       | -1.33 | 2.18 | 1.12  | 1.01  | -0.49 | -0.36 | 0.75  | 0.63  | -0.67 | -2.20 | 0.31  | -0.10 |
| Q9NY12     | H/ACA ribonucleoprotein complex subunit 1                     | GAR1      | -1.33 | 1.69 | 1.08  | 1.13  | 0.71  | -1.32 | 0.10  | -0.07 | -1.33 | 0.31  | -1.37 | 0.75  |
| Q9UHR5     | SAP30-binding protein                                         | SAP30BP   | -1.34 | 2.29 | 2.12  | -0.43 | -0.67 | -0.41 | 1.62  | -0.41 | -0.37 | -0.73 | -0.31 | -0.41 |
| P35658     | Nuclear pore complex protein Nup214                           | NUP214    | -1.34 | 2.61 | -0.18 | -0.44 | -0.66 | 2.09  | 1.60  | -0.36 | -0.34 | -0.90 | -0.49 | -0.33 |
| P53680     | AP-2 complex subunit sigma                                    | AP2S1     | -1.34 | 1.83 | -1.01 | 1.33  | 0.26  | 0.59  | 0.64  | -1.93 | -1.00 | 0.03  | 0.44  | 0.67  |
| Q96IV0     | Peptide-N(4)-(N-acetyl-beta-glucosaminyl)asparagine amidase   | NGLY1     | -1.34 | 3.27 | 0.22  | 0.36  | -0.72 | 0.82  | 1.90  | -0.70 | -1.04 | -1.27 | 0.82  | -0.39 |
| P22102     | Trifunctional purine biosynthetic protein adenosine-3         | GART      | -1.34 | 1.72 | -0.65 | 0.74  | 0.16  | 0.80  | 0.71  | -0.32 | -2.49 | 0.52  | 0.02  | 0.51  |
| Q8N806     | Putative E3 ubiquitin-protein ligase UBR7                     | UBR7      | -1.34 | 2.22 | 0.54  | 0.29  | 1.09  | -0.11 | 0.33  | -0.25 | -1.23 | -1.98 | -0.02 | 1.35  |
| Q9Y2X9     | Zinc finger protein 281                                       | ZNF281    | -1.34 | 3.40 | -0.41 | 1.02  | -0.88 | 1.31  | 1.74  | -0.71 | -0.69 | -1.02 | 0.13  | -0.49 |
| O60503     | Adenylate cyclase type 9                                      | ADCY9     | -1.35 | 3.72 | 1.79  | 1.62  | -0.65 | -0.23 | 0.37  | -0.85 | -1.01 | -0.79 | -0.43 | 0.17  |
| A8MVV0     | Protein FAM171A2                                              | FAM171A2  | -1.35 | 1.67 | 0.39  | 1.66  | -1.38 | 0.19  | 0.82  | -1.13 | 0.60  | -0.78 | 0.57  | -0.95 |
| Q7Z589     | BRCA2-interacting transcriptional repressor EMSY              | EMSY      | -1.35 | 2.88 | -0.49 | -0.71 | 1.40  | 0.93  | 1.28  | -0.80 | -0.82 | -1.03 | -0.71 | 0.95  |
| P14406     | Cytochrome c oxidase subunit 7A2, mitochondrial               | COX7A2    | -1.35 | 1.24 | -0.75 | 1.32  | -1.08 | 0.90  | 0.96  | -0.84 | -0.89 | -1.08 | 0.88  | 0.58  |
| Q08AE8     | Protein spire homolog 1                                       | SPIRE1    | -1.35 | 1.87 | 0.56  | 0.78  | -0.39 | 0.60  | 0.34  | -0.18 | 0.47  | -2.64 | 0.50  | -0.05 |
| Q8WUJ2     | Transforming growth factor-beta receptor-associated protein 1 | TGFBRAP1  | -1.35 | 3.49 | 1.01  | 1.07  | -0.91 | 0.65  | 0.85  | -0.35 | -2.11 | -0.32 | 0.35  | -0.26 |
| Q9Y4W2     | Ribosomal biogenesis protein LAS1L                            | LAS1L     | -1.35 | 1.72 | 1.42  | -0.79 | -0.88 | 1.46  | 0.51  | -0.72 | -0.75 | -1.02 | 1.00  | -0.23 |
| Q6UB98     | Ankyrin repeat domain-containing protein 12                   | ANKRD12   | -1.35 | 1.02 | -0.07 | -0.71 | -0.77 | 0.91  | 1.80  | -0.87 | -0.88 | -0.92 | 0.35  | 1.15  |
| Q9H4B7     | Tubulin beta-1 chain                                          | TUBB1     | -1.36 | 2.04 | -0.76 | 1.52  | 1.27  | 0.79  | -0.87 | -0.95 | -0.97 | 0.24  | 0.63  | -0.91 |
| Q9BY89     | Uncharacterized protein KIAA1671                              | KIAA1671  | -1.36 | 2.05 | -1.06 | 1.49  | -0.45 | 0.81  | 1.16  | -1.26 | -1.13 | -0.44 | 0.49  | 0.39  |
| Q92526     | T-complex protein 1 subunit zeta-2                            | CCT6B     | -1.36 | 0.91 | -1.37 | 0.67  | 0.72  | 0.64  | 0.41  | -1.44 | -1.52 | 0.61  | 0.70  | 0.58  |
| Q9G6G1     | Diphosphoinositol polyphosphate phosphohydrolase 3-beta       | NUDT11    | -1.36 | 1.92 | -0.34 | 0.86  | 0.05  | 0.86  | 0.49  | -0.26 | -0.67 | -2.36 | 0.94  | 0.44  |
| Q8WXS3     | Brain and acute leukemia cytoplasmic protein                  | BAALC     | -1.36 | 2.15 | 1.20  | 1.83  | -0.87 | 0.64  | -0.77 | -0.64 | -0.58 | -0.90 | 0.72  | -0.62 |
| Q9HB21     | Pleckstrin homology domain-containing family A member 1       | PLEKHA1   | -1.36 | 2.95 | 1.10  | 0.67  | -1.06 | 0.99  | 0.73  | 0.33  | -0.61 | -1.73 | 0.54  | -0.96 |
| Q03252     | Lamin-B2                                                      | LMNB2     | -1.37 | 2.69 | -0.68 | 0.58  | 0.40  | 0.68  | 1.34  | -0.77 | -0.87 | -1.26 | -0.87 | 1.44  |
| Q92785     | Zinc finger protein ubi-d4                                    | DPF2      | -1.37 | 3.33 | 1.26  | 1.52  | -1.06 | 0.46  | 0.45  | -0.37 | -0.06 | -1.75 | 0.15  | -0.59 |
| P04179     | Superoxide dismutase [Mn], mitochondrial                      | SOD2      | -1.37 | 1.84 | -0.11 | 0.46  | 0.40  | 0.56  | 0.59  | -0.94 | -2.36 | 1.20  | 0.22  | -0.02 |
| P16112     | Aggrecan core protein                                         | ACAN      | -1.37 | 1.61 | -0.38 | -0.22 | 1.54  | 0.16  | 0.57  | -0.60 | -1.96 | 1.32  | -0.04 | -0.38 |
| Q02156     | Protein kinase C epsilon type                                 | PRKCE     | -1.37 | 2.41 | 1.22  | 1.21  | -0.74 | 0.58  | -0.11 | -0.37 | 0.13  | -2.16 | 0.52  | -0.27 |
| R08779     | Keratin, type 1 cytoskeletal 16                               | KRT16     | -1.37 | 1.17 | -0.57 | 0.07  | 0.77  | 0.58  | 0.49  | -2.40 | -0.70 | 0.91  | 0.64  | 0.23  |
| Q9HD26     | Golgi-associated PDZ and coiled-coil motif-containing protein | GOPC      | -1.37 | 2.56 | 0.57  | 0.73  | 0.25  | 0.80  | 0.02  | 0.61  | -1.28 | -2.29 | 0.37  | 0.21  |
| Q9Y6K8     | Adenylate kinase isoenzyme 5                                  | AK5       | -1.37 | 3.26 | 1.16  | 0.89  | -0.23 | 1.02  | -0.24 | -1.35 | 0.12  | -1.83 | 0.68  | -0.23 |
| Q9BZE9     | Tether containing UBX domain for GLUT4                        | ASPSR1    | -1.37 | 2.42 | 0.57  | 1.08  | 0.19  | 0.46  | -0.03 | -0.11 | -1.24 | -1.64 | 1.54  | -0.81 |
| Q8GUU1     | Pleckstrin homology-like domain family B member 1             | PHLDB1    | -1.38 | 1.96 | -0.61 | -0.73 | 0.77  | 0.53  | 1.92  | -0.78 | -0.80 | -1.18 | 0.93  | -0.06 |
| Q9P0P8     | Mitochondrial transcription rescue factor 1                   | MTRS1     | -1.38 | 2.42 | 0.69  | 0.47  | 1.88  | 0.15  | -1.02 | -0.92 | -0.81 | -1.33 | 0.43  | 0.47  |
| Q75348     | V-type proton ATPase subunit G 1                              | ATP6V1G1  | -1.38 | 2.07 | 0.07  | 0.64  | 1.33  | 0.19  | -0.24 | -0.88 | 0.03  | -2.29 | 0.39  | 0.75  |
| Q9BZF1     | Oxysterol-binding protein-related protein 8                   | OSBPL8    | -1.38 | 1.74 | 0.53  | 0.25  | 0.98  | 0.66  | -0.64 | 0.48  | -0.01 | -2.51 | 0.51  | -0.25 |
| P56211     | cAMP-regulated phosphoprotein 19                              | ARPP19    | -1.38 | 3.71 | 0.24  | 1.68  | 0.21  | -0.11 | 0.78  | -2.24 | -0.50 | -0.34 | 0.02  | 0.27  |
| Q15637     | Splicing factor 1                                             | SF1       | -1.39 | 4.87 | 0.38  | 1.06  | 0.61  | 0.90  | 0.48  | -2.17 | -0.07 | -1.25 | 0.17  | -0.12 |
| Q5JQF8     | Polyadenylate-binding protein 1-like 2                        | PABPC1L2A | -1.39 | 2.61 | 0.84  | 0.30  | -0.66 | 1.05  | 0.78  | 0.13  | -1.31 | -1.98 | 0.59  | 0.28  |
| Q9NPF8     | Arf-GAP with dual PH domain-containing protein 2              | ADAP2     | -1.39 | 1.62 | -0.10 | 2.83  | -0.43 | -0.22 | -0.33 | -0.29 | -0.30 | -0.50 | -0.36 | -0.29 |
| A0A1B0GTU1 | Zinc finger CCCH domain-containing protein 11B                | ZC3H11B   | -1.39 | 1.93 | 1.51  | 0.89  | -1.42 | 0.31  | 0.57  | 0.56  | -1.16 | -0.45 | 0.39  | -1.21 |
| O60331     | Phosphatidylinositol 4-phosphate 5-kinase type-1 gamma        | PIPSK1C   | -1.39 | 4.48 | -0.01 | 0.82  | 1.78  | 0.55  | -0.08 | -1.38 | -0.07 | -0.71 | 0.56  | -1.46 |
| P35626     | Beta-adrenergic receptor kinase 2                             | GRK3      | -1.39 | 3.03 | -0.32 | -0.33 | 1.48  | -0.36 | 2.20  | -0.49 | -0.31 | -0.90 | -0.51 | -0.45 |
| Q9NVN3     | Synembryn-B                                                   | RIC8B     | -1.39 | 1.03 | 0.26  | 1.75  | -0.87 | 0.89  | -0.85 | -0.74 | 0.04  | -0.94 | -0.79 | 1.24  |
| P29074     | Tyrosine-protein phosphatase non-receptor type 4              | PTPN4     | -1.40 | 3.60 | 1.55  | -0.44 | -0.87 | 1.52  | 1.21  | -0.55 | -0.53 | -0.93 | -0.49 | -0.47 |
| Q8N490     | Probable hydrolase PNKD                                       | PNKD      | -1.40 | 2.24 | -0.12 | 2.55  | -0.64 | 0.90  | -0.48 | -0.41 | -0.45 | -0.66 | -0.36 | -0.30 |
| P46939     | Utrophin                                                      | UTRN      | -1.40 | 3.19 | -0.74 | 2.20  | 0.05  | 0.60  | 0.49  | -0.33 | -1.35 | -1.02 | 0.11  | -0.02 |
| P61421     | V-type proton ATPase subunit d 1                              | ATP6V0D1  | -1.40 | 6.48 | 0.95  | 1.21  | 1.09  | 0.42  | -0.01 | -0.82 | 0.31  | -1.87 | -0.35 | -0.94 |
| Q9Y3A4     | Ribosomal RNA-processing protein 7 homolog A                  | RRP7A     | -1.40 | 2.13 | -0.71 | 1.12  | 0.14  | -0.48 | 1.93  | -0.82 | -0.78 | 0.99  | -0.59 | -0.80 |
| Q8TE49     | OTU domain-containing protein 7A                              | OTUD7A    | -1.40 | 1.05 | 0.85  | 0.79  | 1.17  | -0.90 | -0.72 | -0.98 | 0.86  | -1.15 | 1.03  | -0.95 |
| Q6ZV89     | SH2 domain-containing protein 5                               | SH2D5     | -1.41 | 2.03 | -0.21 | 0.98  | -0.09 | 0.96  | 0.34  | -2.24 | 0.40  | -1.06 | 0.80  | 0.12  |
| Q05516     | Zinc finger and BTB domain-containing protein 16              | ZBTB16    | -1.41 | 2.56 | 0.34  | 0.89  | -1.38 | 1.02  | 1.38  | -0.59 | 0.11  | -1.30 | 0.49  | -0.97 |
| Q8IWT3     | Cullin-9                                                      | CUL9      | -1.41 | 2.07 | 0.27  | -0.04 | -0.98 | 1.05  | 1.64  | -0.84 | -0.98 | -1.16 | 1.07  | -0.05 |
| Q9H2P0     | Activity-dependent neuroprotector homeobox protein            | ADNP      | -1.42 | 2.13 | -0.38 | 0.48  | 0.65  | 0.62  | 0.70  | -0.60 | -2.53 | 0.47  | 0.58  | 0.01  |
| P16144     | Integrin beta-4                                               | ITGB4     | -1.42 | 0.66 | -1.01 | 0.43  | 0.40  | 0.84  | 0.17  | -1.40 | -1.76 | 0.68  | 0.87  | 0.78  |
| Q13075     | Baculoviral IAP repeat-containing protein 1                   | NAIP      | -1.42 | 2.75 | 0.43  | 1.07  | -0.77 | -0.53 | 2.32  | -0.39 | -0.40 | -0.80 | -0.53 | -0.40 |
| Q96D29     | CKLF-like MARVEL transmembrane domain-containing protein 5    | CMTM5     | -1.42 | 2.82 | -0.35 | 1.84  | 1.92  | -0.39 | -0.46 | -0.40 | -0.47 | -0.83 | -0.41 | -0.44 |
| Q9BV73     | Centrosome-associated protein CEP250                          | CEP250    | -1.42 | 1.92 | 2.48  | -0.44 | 0.85  | -0.47 | -0.49 | -0.50 | -0.46 | -0.84 | -0.44 | 0.31  |
| P47224     | Guanine nucleotide exchange factor MSS4                       | RAB1F     | -1.42 | 2.32 | 1.63  | 2.11  | -0.62 | -0.44 | -0.43 | -0.39 | -0.30 | -0.74 | -0.45 | -0.38 |
| P35613     | Basigin                                                       | BSG       | -1.42 | 1.64 | -0.15 | -0.29 | 2.83  | -0.31 | -0.32 | -0.34 | -0.23 | -0.54 | -0.37 | -0.28 |
| Q6ZMT1     | SH3 and cysteine-rich domain-containing protein 2             | STAC2     | -1.42 | 3.29 | 1.29  | 1.72  | -0.80 | 1.06  | -0.56 | 0.22  | -0.67 | -1.01 | -0.65 | -0.60 |
| O15240     | Neurosecretory protein VGF                                    | VGF       | -1.42 | 1.55 | 1.17  | 1.16  | -1.18 | -0.47 | 0.91  | 0.96  | 0.00  | -1.33 | -1.06 | -0.18 |
| Q17R89     | Rho GTPase-activating protein 44                              | ARHGAP44  | -1.42 | 4.42 | 0.82  | 1.62  | 0.06  | 0.71  | -0.17 | -0.25 | -1.60 | -1.48 | 0.52  | -0.24 |
| P56377     | AP-1 complex subunit sigma-2                                  | AP1S2     | -1.42 | 1.78 | 1.53  | 2.01  | -0.66 | -0.45 | -0.61 | 0.48  | -0.55 | -0.76 | -0.50 | -0.49 |
| Q9UQ13     | Leucine-rich repeat protein SHOC-2                            | SHOC2     | -1.43 | 2.02 | 0.43  | 0.10  | 1.21  | -1.07 | 1.24  | -1.16 | -1.05 | 0.89  | 0.49  | -1.09 |
| P78352     | Disks large homolog 4                                         | DLG4      | -1.43 | 2.35 | -0.16 | 0.84  | 1.50  | -0.23 | 0.18  | -1.34 | 1.18  | -1.63 | -0.26 | -0.09 |
| Q9UPW8     | Protein unc-13 homolog A                                      | UNC13A    | -1.43 | 1.00 | -0.27 | 0.36  | 1.14  | -0.67 | 0.61  | 0.28  | -1.85 | 1.34  | -1.15 | 0.21  |

|        |                                                                      |           |       |      |       |       |       |       |       |       |       |       |       |       |
|--------|----------------------------------------------------------------------|-----------|-------|------|-------|-------|-------|-------|-------|-------|-------|-------|-------|-------|
| Q96B45 | BLOC-1-related complex subunit 7                                     | BORCS7    | -1.43 | 3.35 | -0.42 | 0.52  | 0.73  | -0.44 | 2.46  | -0.53 | -0.58 | -0.89 | -0.48 | -0.37 |
| P43Z50 | G protein-coupled receptor kinase 6                                  | GRK6      | -1.43 | 2.14 | -1.26 | 1.69  | 0.03  | 0.62  | 0.93  | -0.09 | 0.48  | -1.22 | 0.07  | -1.25 |
| Q8TAB3 | Protocadherin-19                                                     | PCDH19    | -1.43 | 3.39 | 1.33  | 1.69  | 0.75  | -0.16 | -0.91 | -0.81 | 0.20  | -1.24 | -0.02 | -0.83 |
| P50454 | Serpin H1                                                            | SERPINH1  | -1.43 | 1.60 | -0.23 | -0.28 | 2.83  | -0.30 | -0.29 | -0.23 | -0.32 | -0.55 | -0.33 | -0.30 |
| Q13972 | Ras-specific guanine nucleotide-releasing factor 1                   | RASGRF1   | -1.43 | 2.11 | 1.45  | -0.16 | -0.99 | 0.99  | 0.69  | -0.32 | -0.08 | -2.00 | 0.55  | -0.12 |
| Q9BZ17 | Regulator of nonsense transcripts 3B                                 | UPF3B     | -1.44 | 2.05 | 0.73  | 2.28  | -0.48 | -0.77 | 0.22  | 0.02  | -0.18 | -0.51 | -1.44 | 0.14  |
| Q9NRD1 | F-box only protein 6                                                 | FBXO6     | -1.44 | 3.86 | 0.85  | 0.15  | 1.23  | 0.85  | -0.17 | -1.69 | -1.11 | -1.16 | 0.44  | 0.61  |
| Q12923 | Tyrosine-protein phosphatase non-receptor type 13                    | PTPN13    | -1.44 | 1.56 | -0.86 | 0.89  | 1.26  | 0.56  | -0.25 | -0.06 | -2.06 | -0.71 | 0.63  | 0.59  |
| P35232 | Prohibitin                                                           | PHB       | -1.44 | 2.50 | 0.50  | 0.88  | 0.23  | 0.94  | -0.25 | -0.52 | -2.36 | -0.60 | 0.80  | 0.38  |
| Q9UQC2 | GRB2-associated-binding protein 2                                    | GAB2      | -1.44 | 1.92 | 0.82  | 1.25  | -1.30 | 0.60  | 0.49  | 0.47  | -0.70 | -1.48 | 0.82  | -0.95 |
| Q75151 | Lysine-specific demethylase PHF2                                     | PHF2      | -1.45 | 4.87 | 0.49  | 0.66  | 1.37  | 0.40  | 0.42  | 0.07  | -0.68 | -2.28 | 0.16  | -0.62 |
| Q53HC5 | Kelch-like protein 26                                                | KLHL26    | -1.45 | 2.12 | -0.58 | -0.06 | 2.22  | 1.19  | -0.73 | -0.57 | -0.68 | -0.97 | 0.20  | -0.04 |
| Q9UPY6 | Wiskott-Aldrich syndrome protein family member 3                     | WASF3     | -1.45 | 3.10 | 1.99  | -0.01 | 0.59  | 0.23  | -0.29 | 0.64  | 0.19  | -1.06 | -1.58 | -0.69 |
| Q12805 | EGF-containing fibulin-like extracellular matrix protein 1           | EFEMP1    | -1.45 | 1.58 | -0.73 | 0.65  | 0.65  | -0.03 | 1.10  | -0.36 | -2.34 | 0.85  | 0.24  | -0.03 |
| Q86TP1 | Exopolyphosphatase PRUNE1                                            | PRUNE1    | -1.46 | 1.97 | -0.05 | 0.00  | 2.78  | -0.12 | -0.59 | -0.26 | -0.62 | -0.46 | -0.36 | -0.32 |
| Q969G6 | Riboflavin kinase                                                    | RFK       | -1.46 | 2.12 | -0.18 | 0.62  | 0.35  | 0.17  | 1.11  | -0.68 | -2.43 | 0.88  | 0.23  | -0.05 |
| Q9Y6R1 | Electrogenic sodium bicarbonate cotransporter 1                      | SLC4A4    | -1.46 | 2.12 | -1.08 | 0.55  | 1.79  | 0.01  | 0.71  | -1.16 | -1.10 | -0.43 | -0.29 | 1.00  |
| Q75970 | Multiple PDZ domain protein                                          | MPDZ      | -1.46 | 3.59 | 1.16  | 0.63  | -0.33 | 1.13  | 0.18  | -0.26 | 0.36  | -2.23 | 0.16  | -0.80 |
| Q14151 | Scaffold attachment factor B2                                        | SAFB2     | -1.46 | 1.84 | 0.78  | 0.78  | -0.96 | 0.70  | 0.53  | -1.75 | -1.41 | 0.97  | 0.03  | 0.35  |
| Q13873 | Bone morphogenetic protein receptor type-2                           | BMPR2     | -1.47 | 2.78 | -0.34 | 2.12  | 1.41  | -0.96 | 0.31  | -0.45 | -0.50 | -0.75 | -0.51 | -0.34 |
| Q14640 | Segment polarity protein dishevelled homolog DVL-1                   | DVL1      | -1.47 | 2.38 | 0.05  | 0.88  | -1.14 | 1.06  | 1.29  | -0.98 | -0.80 | -1.27 | 0.95  | -0.04 |
| Q15230 | Laminin subunit alpha-5                                              | LAMA5     | -1.47 | 1.92 | -0.95 | -0.28 | 1.47  | 0.35  | 1.26  | -1.09 | -1.09 | 0.88  | 0.37  | -0.93 |
| Q9BV68 | E3 ubiquitin-protein ligase RNF126                                   | RNF126    | -1.47 | 2.75 | 1.14  | 1.29  | -1.07 | -0.09 | 1.08  | -0.87 | -0.81 | 0.98  | -0.78 | -0.86 |
| Q9NRX5 | Serine incorporator 1                                                | SERINC1   | -1.47 | 2.50 | 2.20  | 1.53  | -0.55 | -0.34 | -0.46 | -0.36 | -0.41 | -0.71 | -0.47 | -0.42 |
| Q5JU85 | IQ motif and SEC7 domain-containing protein 2                        | IQSEC2    | -1.47 | 4.15 | 0.46  | 1.34  | -0.34 | 0.85  | 0.68  | -1.78 | -0.62 | -1.35 | 0.47  | 0.29  |
| Q9Y2G0 | Protein EFR3 homolog B                                               | EFR3B     | -1.47 | 2.40 | 0.68  | 1.29  | -0.28 | 0.34  | 0.17  | -0.76 | 0.60  | -2.37 | 0.30  | 0.03  |
| P80723 | Brain acid soluble protein 1                                         | BASP1     | -1.47 | 2.90 | 0.12  | 1.85  | -0.29 | -0.42 | 1.16  | -1.83 | 0.48  | -0.29 | -0.42 | -0.35 |
| A6XGL0 | Yjef N-terminal domain-containing protein 3                          | YJEFN3    | -1.48 | 1.94 | -0.20 | 0.95  | 0.57  | 0.78  | -0.19 | -1.70 | -1.66 | -0.23 | 0.87  | 0.79  |
| Q9UBM7 | 7-dehydrocholesterol reductase                                       | DHCR7     | -1.48 | 2.06 | -0.52 | 0.98  | -0.81 | 0.35  | 1.96  | -0.67 | -0.61 | -0.99 | -0.65 | 0.96  |
| Q6ZS81 | WD repeat- and FYVE domain-containing protein 4                      | WDFY4     | -1.48 | 1.87 | 1.15  | -0.19 | 0.43  | 0.12  | 0.38  | 0.81  | -2.55 | 0.24  | -0.13 | -0.26 |
| Q95793 | Double-stranded RNA-binding protein Staufen homolog 1                | STAU1     | -1.48 | 1.76 | 1.31  | 0.40  | 0.74  | -1.17 | 0.48  | 0.61  | -0.38 | -1.47 | -1.29 | 0.78  |
| Q43166 | Signal-induced proliferation-associated 1-like protein 1             | SIPA1L1   | -1.49 | 2.68 | -0.93 | 1.75  | 0.51  | 0.81  | 0.15  | -0.85 | -1.14 | -1.24 | 0.73  | 0.20  |
| Q15622 | Zinc finger CCCH domain-containing protein 11A                       | ZC3H11A   | -1.49 | 2.24 | -0.60 | -0.14 | 0.38  | 1.14  | 1.29  | -1.92 | -0.57 | -0.82 | 0.79  | 0.47  |
| Q15772 | Striated muscle preferentially expressed protein kinase              | SPEG      | -1.49 | 2.80 | 2.04  | -0.37 | 1.72  | -0.33 | -0.51 | -0.39 | -0.51 | -0.74 | -0.51 | -0.41 |
| P63215 | Guanine nucleotide-binding protein G(1)/G(S)/G(O) subunit gamma GNG3 | GNG3      | -1.49 | 1.89 | 1.22  | 1.38  | -0.32 | -1.13 | 0.69  | 0.71  | -0.34 | -1.37 | -1.09 | 0.25  |
| Q86UW8 | Hyaluronan and proteoglycan link protein 4                           | HAPLN4    | -1.49 | 2.35 | 0.54  | 0.00  | 0.96  | -0.58 | 1.22  | -0.20 | -2.34 | 0.61  | -0.26 | 0.06  |
| Q9UJF2 | Ras GTPase-activating protein nGAP                                   | RASA1     | -1.50 | 3.46 | 1.01  | 0.98  | -1.09 | 0.88  | 0.90  | -0.33 | -0.54 | -1.77 | 0.59  | -0.62 |
| Q8ND11 | BH domain-binding protein 1                                          | BHBP1     | -1.50 | 2.83 | 0.83  | 0.88  | 0.21  | 0.80  | -0.25 | 0.18  | -0.43 | -2.55 | 0.20  | 0.13  |
| Q7Z7E8 | Ubiquitin-conjugating enzyme E2 Q1                                   | UBE2Q1    | -1.50 | 1.60 | -0.84 | 1.05  | -0.55 | 1.17  | 0.80  | -1.04 | -0.94 | -1.23 | 1.06  | 0.52  |
| Q00408 | cGMP-dependent 3',5'-cyclic phosphodiesterase                        | PDE2A     | -1.50 | 3.28 | 0.38  | 1.89  | 0.31  | 0.18  | -0.16 | -1.40 | 0.49  | -1.71 | 0.12  | -0.10 |
| Q9NRF2 | SH2B adapter protein 1                                               | SH2B1     | -1.50 | 2.78 | -0.02 | 0.79  | 1.51  | 0.50  | -0.41 | -0.55 | -1.18 | -1.77 | 0.28  | 0.86  |
| Q2M389 | WASH complex subunit 4                                               | WASHC4    | -1.51 | 2.80 | -1.00 | 1.54  | 0.27  | 0.76  | 0.78  | -1.42 | -1.28 | -0.47 | 0.68  | 0.13  |
| Q94885 | SAM and SH3 domain-containing protein 1                              | SASH1     | -1.51 | 1.64 | 0.79  | 0.52  | -0.78 | 0.68  | 0.48  | -0.20 | 0.68  | -2.46 | 0.49  | -0.20 |
| P29475 | Nitric oxide synthase, brain                                         | NOS1      | -1.51 | 1.38 | -0.98 | -0.42 | 0.61  | 0.24  | 2.02  | -1.60 | -0.70 | 0.46  | 0.28  | 0.09  |
| Q94910 | Adhesion G protein-coupled receptor L1                               | ADGR1     | -1.51 | 2.32 | 1.01  | 1.49  | -0.70 | 0.56  | -0.25 | 0.65  | -0.83 | -1.74 | 0.52  | -0.70 |
| Q75155 | Cullin-associated NEDD8-dissociated protein 2                        | CAND2     | -1.51 | 1.04 | 0.42  | 2.21  | -1.32 | 0.07  | -0.18 | 0.05  | 0.27  | -1.39 | 0.22  | -0.36 |
| P0DJ18 | Serum amyloid A-1 protein                                            | SAA1      | -1.51 | 1.35 | -0.46 | 1.96  | 1.23  | -0.60 | -0.67 | -0.53 | -0.56 | -0.82 | -0.57 | 1.02  |
| P52824 | Diacylglycerol kinase theta                                          | DGKQ      | -1.52 | 1.63 | -0.65 | 0.50  | 0.19  | 0.38  | 1.26  | -1.26 | -2.03 | 0.66  | 0.46  | 0.48  |
| Q9UL11 | NACHT and WD repeat domain-containing protein 2                      | NWD2      | -1.52 | 1.20 | -0.01 | 1.41  | -1.40 | 0.66  | 0.66  | -1.27 | -1.35 | 0.14  | 0.66  | 0.50  |
| Q7Z2W4 | Zinc finger CCCH-type antiviral protein 1                            | ZC3HAV1   | -1.52 | 5.29 | 0.39  | 1.23  | -0.19 | 0.21  | 1.65  | -0.23 | -1.60 | -1.36 | 0.09  | -0.19 |
| Q9UPX8 | SH3 and multiple ankyrin repeat domains protein 2                    | SHANK2    | -1.53 | 3.73 | 0.71  | 0.87  | 0.83  | 0.35  | 0.23  | -0.71 | -0.11 | -2.41 | 0.64  | -0.40 |
| Q86U58 | Telomerase-binding protein EST1A                                     | SMG6      | -1.53 | 0.98 | -1.38 | 0.51  | 0.59  | 0.85  | 0.57  | -1.42 | -1.47 | 0.19  | 0.74  | 0.83  |
| Q75351 | Vacuolar protein sorting-associated protein 4B                       | VPS4B     | -1.53 | 2.36 | 0.27  | 0.56  | 1.38  | 0.49  | -0.54 | 0.19  | 0.00  | -2.38 | 0.51  | -0.47 |
| P58005 | Sestrin-3                                                            | SESN3     | -1.53 | 2.54 | 0.88  | -0.32 | -0.47 | -0.27 | 2.57  | -0.43 | -0.38 | -0.73 | -0.45 | -0.42 |
| O00533 | Neural cell adhesion molecule L1-like protein                        | CHL1      | -1.53 | 3.39 | -0.89 | 0.69  | 1.85  | 0.05  | 0.97  | -1.24 | -0.91 | 0.61  | -0.57 | -0.57 |
| Q6ZUT9 | DENN domain-containing protein 5B                                    | DENND5B   | -1.54 | 5.34 | 0.75  | 2.06  | -0.36 | 0.92  | 0.08  | -0.60 | -1.30 | -0.98 | -0.16 | -0.41 |
| Q9Y4F4 | TOG array regulator of axonemal microtubules protein 1               | TORGARAM1 | -1.54 | 1.47 | -0.20 | -0.33 | -0.42 | -0.27 | 2.84  | -0.28 | -0.33 | -0.47 | -0.30 | -0.24 |
| Q96PV0 | Ras/Rap GTPase-activating protein SynGAP                             | SYNGAP1   | -1.54 | 1.86 | 0.01  | 0.03  | 0.84  | 0.63  | 0.39  | -1.07 | 1.46  | -2.05 | 0.24  | -0.48 |
| Q9P2G1 | Ankyrin repeat and IBR domain-containing protein 1                   | ANKIB1    | -1.54 | 2.78 | 0.60  | 1.33  | -1.17 | 1.08  | 0.51  | -0.98 | -0.90 | -1.32 | 0.73  | 0.12  |
| Q69YW2 | Protein stum homolog                                                 | STUM      | -1.55 | 1.55 | 0.43  | 1.10  | -1.00 | 0.93  | 0.15  | 0.50  | 0.45  | 0.58  | -1.58 | -1.56 |
| Q94905 | Erlin-2                                                              | ERLIN2    | -1.55 | 2.33 | 1.00  | 0.70  | 0.28  | 0.01  | 0.22  | 0.25  | -2.67 | -0.28 | 0.21  | 0.28  |
| P40123 | Adenylyl cyclase-associated protein 2                                | CAP2      | -1.55 | 3.98 | 0.25  | 1.81  | -0.16 | 0.67  | 0.32  | -0.75 | -0.52 | -2.00 | 0.48  | -0.10 |
| P29323 | Ephrin type-B receptor 2                                             | EPHB2     | -1.55 | 3.53 | 0.37  | 0.25  | 0.91  | 0.88  | 0.48  | -1.26 | -1.21 | -1.69 | 0.97  | 0.30  |
| Q9BZ71 | Membrane-associated phosphatidylinositol transfer protein 3          | PITPM3    | -1.55 | 1.64 | 0.95  | 0.07  | 0.18  | 0.39  | 0.15  | 0.71  | 0.51  | -2.57 | 0.26  | -0.65 |
| Q9Y2U9 | Kelch domain-containing protein 2                                    | KLHDC2    | -1.55 | 2.59 | 2.65  | -0.35 | -0.53 | 0.20  | 0.45  | -0.35 | -0.44 | -0.81 | -0.41 | -0.40 |
| Q9UD71 | Protein phosphatase 1 regulatory subunit 1B                          | PPP1R1B   | -1.55 | 2.64 | 0.49  | 0.94  | 0.05  | -0.95 | 1.75  | -0.99 | -1.10 | 0.86  | -1.00 | -0.05 |
| Q96DG6 | Carboxymethylenebutenolidase homolog                                 | CMBL      | -1.55 | 1.87 | -1.14 | 0.52  | 0.38  | 0.83  | 1.23  | -1.23 | -1.61 | -0.30 | 0.66  | 0.66  |
| Q6ZVL6 | UPF0606 protein KIAA1549L                                            | KIAA1549L | -1.55 | 3.35 | 0.22  | 1.17  | -0.01 | 0.40  | 0.94  | -2.15 | 0.47  | -0.04 | 0.27  | -1.27 |
| Q562R1 | Beta-actin-like protein 2                                            | ACTBL2    | -1.56 | 1.16 | 0.17  | -0.84 | 0.19  | 1.17  | 0.62  | -2.09 | -0.37 | -0.53 | 1.24  | 0.45  |
| Q14669 | E3 ubiquitin-protein ligase TRIP12                                   | TRIP12    | -1.56 | 1.66 | -0.25 | 0.45  | -0.05 | 0.31  | 1.26  | -1.73 | -1.72 | 0.79  | 0.28  | 0.65  |
| Q9NZQ8 | Transient receptor potential cation channel subfamily M member       | TRPM5     | -1.56 | 2.18 | -1.22 | 0.90  | 1.06  | 0.94  | 0.34  | -1.36 | -1.42 | 0.83  | 0.08  | -0.14 |
| Q96N16 | Janus kinase and microtubule-interacting protein 1                   | JAKMIP1   | -1.56 | 1.93 | -0.14 | 1.38  | -1.13 | 1.09  | 0.67  | -0.92 | -0.92 | -1.27 | 0.83  | 0.41  |
| Q8N6N2 | Tetrapeptide repeat protein 9B                                       | TTC9B     | -1.56 | 3.33 | 0.79  | 0.85  | -1.10 | 0.80  | 1.28  | -0.89 | 0.01  | -0.57 | 0.52  | -1.67 |
| Q9NZR2 | Low-density lipoprotein receptor-related protein 1B                  | LRP1B     | -1.57 | 3.16 | -0.12 | 2.04  | -0.17 | 1.18  | -0.37 | -0.25 | 0.10  | -1.69 | -0.19 | -0.54 |
| Q86VY4 | Testis-specific Y-encoded-like protein 5                             | TSPY15    | -1.57 | 2.76 | 1.76  | -0.70 | -0.83 | 0.53  | 1.76  | -0.57 | -0.65 | -0.47 | -0.57 | -0.27 |
| Q60716 | Catenin delta-1                                                      | CTNND1    | -1.57 | 1.40 | -0.82 | 0.94  | 0.11  | 0.17  | 1.10  | -1.44 | 0.65  | -1.70 | 0.11  | 0.88  |
| Q9BZ29 | Dedicator of cytokinesis protein 9                                   | DOCK9     | -1.57 | 2.19 | -0.83 | 1.18  | 0.24  | 0.78  | 0.66  | -1.98 | -0.91 | -0.44 | 0.79  | 0.50  |
| Q9NR82 | Potassium voltage-gated channel subfamily KQT member 5               | KCNQ5     | -1.58 | 3.90 | 0.20  | 1.64  | -0.99 | 0.75  | 1.32  | -0.68 | -0.62 | -1.17 | 0.36  | -0.81 |
| Q15164 | Transcription intermediary factor 1-alpha                            | TRIM24    | -1.58 | 3.27 | 2.11  | -0.45 | -0.83 | 0.99  | 0.99  | -0.48 | -0.41 | -0.88 | -0.58 | -0.45 |
| Q12816 | Trophinin                                                            | TRO       | -1.58 | 2.79 | 2.11  | -0.49 | -0.58 | -0.10 | 1.59  | -0.44 | -0.50 | -0.82 | -0.39 | -0.39 |
| Q6ZNB6 | NF-X1-type zinc finger protein NFXL1                                 | NFXL1     | -1.58 | 3.52 | 0.37  | 0.87  | -1.14 | 1.42  | 1.21  | -0.87 | -0.84 | -1.33 | -0.04 | 0.35  |
| Q13435 | Splicing factor 3B subunit 2                                         | SF3B2     | -1.58 | 2.12 | 0.51  | -0.12 | 0.79  | -0.15 | 1.02  | -0.64 | -2.26 | 0.47  | -0.58 | 0.97  |
| Q9P2Y5 | UV radiation resistance-associated gene protein                      | UVRAG     | -1.59 | 2.83 | 0.76  | 0.83  | -0.62 | 0.93  | 0.52  | -0.48 | 0.00  | -2.34 | 0.66  | -0.27 |

|        |                                                                           |          |       |      |       |       |       |       |       |       |       |       |       |       |
|--------|---------------------------------------------------------------------------|----------|-------|------|-------|-------|-------|-------|-------|-------|-------|-------|-------|-------|
| Q726G8 | Ankyrin repeat and sterile alpha motif domain-containing protein          | ANKS1B   | -1.59 | 3.32 | 0.73  | 0.22  | 0.30  | -0.43 | 1.79  | -1.95 | 0.35  | -0.66 | 0.34  | -0.69 |
| O43761 | Synaptogyrin-3                                                            | SYNGR3   | -1.59 | 1.88 | 0.91  | 1.71  | -1.25 | 0.50  | -0.04 | -0.58 | 0.65  | -1.53 | 0.18  | -0.55 |
| A6NKN8 | Purkinje cell protein 4-like protein 1                                    | PCP4L1   | -1.59 | 4.43 | -0.34 | 0.75  | 1.76  | -0.48 | 1.58  | -0.68 | -0.23 | -1.02 | -0.69 | -0.67 |
| P17029 | Zinc finger protein with KRAB and SCAN domains 1                          | ZKSCAN1  | -1.59 | 1.26 | -0.75 | 0.37  | -0.47 | 1.04  | 1.19  | -1.84 | -0.41 | -0.76 | 1.07  | 0.57  |
| Q8WVD5 | RING finger protein 141                                                   | RNF141   | -1.59 | 2.74 | -0.28 | 1.56  | -0.37 | 0.92  | 0.51  | -1.49 | -1.47 | -0.49 | 0.64  | 0.48  |
| Q94805 | Actin-like protein 6B                                                     | ACTL6B   | -1.59 | 1.33 | 1.01  | -1.49 | 0.26  | 0.98  | 0.67  | 0.81  | -0.28 | -1.36 | 0.56  | -1.16 |
| Q9Y6D6 | Brefeldin A-inhibited guanine nucleotide-exchange protein 1               | ARFGEF1  | -1.60 | 2.92 | 0.53  | 1.31  | -0.25 | -0.07 | 0.95  | 0.09  | 0.35  | -2.40 | -0.31 | -0.19 |
| O15357 | Phosphatidylinositol 3,4,5-trisphosphate 5-phosphatase 2                  | INPPL1   | -1.60 | 2.03 | -0.83 | 0.33  | 1.85  | -0.16 | 0.75  | -0.10 | -0.66 | -1.82 | -0.01 | 0.67  |
| Q9HCH5 | Synaptotagmin-like protein 2                                              | SYTL2    | -1.60 | 3.61 | -0.67 | 0.83  | 0.66  | 0.79  | 1.14  | -1.93 | -1.05 | 0.07  | 0.64  | -0.48 |
| Q13671 | Ras and Rab interactor 1                                                  | RIN1     | -1.60 | 2.32 | 0.60  | 1.07  | -1.15 | 1.03  | 0.55  | -0.81 | -0.28 | -1.86 | 0.79  | 0.06  |
| Q9Y6W5 | Wiskott-Aldrich syndrome protein family member 2                          | WASF2    | -1.60 | 4.11 | -0.33 | 1.48  | 1.58  | 1.19  | -0.74 | -0.52 | -0.58 | -1.03 | -0.56 | -0.49 |
| Q01804 | OTU domain-containing protein 4                                           | OTUD4    | -1.61 | 7.31 | 1.12  | 0.73  | 1.22  | 0.68  | 0.11  | -1.65 | -0.66 | -1.31 | 0.28  | -0.51 |
| Q8N111 | Cell cycle exit and neuronal differentiation protein 1                    | CEND1    | -1.61 | 4.16 | -0.23 | 0.06  | 0.98  | -0.02 | 2.34  | -0.38 | -0.50 | -1.02 | -0.23 | -1.00 |
| Q16629 | Serine/arginine-rich splicing factor 7                                    | SRSF7    | -1.61 | 1.68 | -0.09 | 0.49  | 0.28  | 0.08  | 1.01  | -2.65 | -0.24 | 0.63  | 0.06  | 0.43  |
| Q9NTX7 | E3 ubiquitin-protein ligase RNF146                                        | RNF146   | -1.61 | 2.37 | 0.94  | 1.13  | -1.26 | 0.27  | 1.06  | 0.06  | -0.22 | -1.46 | -1.19 | 0.67  |
| Q05519 | Serine/arginine-rich splicing factor 11                                   | SRSF11   | -1.61 | 2.93 | -0.15 | -0.35 | 0.33  | 0.43  | 2.17  | -1.58 | 0.14  | -1.08 | 0.33  | -0.24 |
| Q9NY10 | PH and SEC7 domain-containing protein 3                                   | PSD3     | -1.61 | 3.49 | 0.69  | 1.21  | -0.34 | 0.83  | 0.36  | -0.68 | 0.50  | -2.22 | 0.28  | -0.63 |
| Q14088 | Ras-related protein Rab-33A                                               | RAB33A   | -1.61 | 2.90 | 0.44  | 0.95  | 0.08  | 0.55  | 0.55  | -0.34 | 0.11  | -2.64 | 0.44  | -0.15 |
| Q95359 | Transforming acidic coiled-coil-containing protein 2                      | TACC2    | -1.62 | 1.16 | 1.20  | -0.90 | 0.68  | -0.92 | 1.23  | 0.16  | -0.92 | 1.22  | -0.89 | -0.87 |
| Q12926 | ELAV-like protein 2                                                       | ELAVL2   | -1.62 | 2.65 | 0.88  | 0.41  | -0.45 | 0.34  | 1.16  | -1.70 | -0.91 | 1.21  | 0.16  | -1.09 |
| Q9UI09 | NADH dehydrogenase [ubiquinone] 1 alpha subcomplex subunit 12             | NDUFA12  | -1.62 | 3.73 | -0.49 | 1.41  | 1.33  | 0.65  | -0.12 | -1.45 | -1.36 | -0.47 | -0.13 | 0.63  |
| Q14444 | Caprin-1                                                                  | CAPRIN1  | -1.63 | 3.27 | 1.30  | -0.10 | -0.87 | 1.05  | 1.21  | -0.81 | -0.43 | -1.50 | 0.74  | -0.59 |
| P25098 | Beta-adrenergic receptor kinase 1                                         | GRK2     | -1.63 | 2.17 | 0.56  | 0.50  | 0.02  | 0.18  | 0.86  | 0.91  | -0.31 | -2.55 | 0.25  | -0.43 |
| Q58WV2 | DDb1- and CUL4-associated factor 6                                        | DCAF6    | -1.63 | 3.97 | -0.78 | 0.53  | 0.78  | 1.19  | 1.16  | -0.96 | -0.99 | 1.00  | -0.91 | -1.02 |
| Q9ULJ8 | Neurabin-1                                                                | PPP1R9A  | -1.64 | 3.14 | 0.56  | 0.69  | -0.30 | 0.46  | 1.20  | -1.82 | 1.20  | -1.17 | -0.49 | -0.33 |
| Q75400 | Pre-mRNA-processing factor 40 homolog A                                   | PRPF40A  | -1.64 | 2.76 | -0.04 | -0.30 | 1.30  | 0.76  | 0.67  | -1.94 | -1.43 | 0.14  | 0.44  | 0.40  |
| P49619 | Diacylglycerol kinase gamma                                               | DGKG     | -1.65 | 2.36 | 1.23  | 0.11  | -0.59 | 0.55  | 0.86  | 0.02  | -0.78 | -2.26 | 0.43  | 0.44  |
| O15117 | FYN-binding protein 1                                                     | FYB1     | -1.65 | 1.13 | -1.60 | 0.88  | 0.84  | 0.51  | 0.63  | -1.67 | -0.93 | 0.37  | 0.35  | 0.62  |
| Q15031 | Probable leucine-tRNA ligase, mitochondrial                               | LARS2    | -1.65 | 2.45 | -0.53 | 0.84  | 1.32  | 0.27  | 0.31  | -1.16 | -1.16 | -1.46 | 0.65  | 0.93  |
| P14867 | Gamma-aminobutyric acid receptor subunit alpha-1                          | GABRA1   | -1.65 | 1.65 | -0.16 | 0.53  | 0.52  | 0.28  | 0.58  | -2.77 | 0.08  | 0.39  | 0.25  | 0.31  |
| Q9BZL4 | Protein phosphatase 1 regulatory subunit 12C                              | PPP1R12C | -1.66 | 2.62 | 1.35  | 0.78  | 0.32  | 0.10  | -0.22 | 0.12  | 0.77  | -2.12 | 0.06  | -1.15 |
| Q8NF13 | Cytosolic endo-beta-N-acetylglucosaminidase                               | ENGASE   | -1.66 | 2.94 | 0.03  | 0.36  | 0.11  | 0.27  | 1.70  | -1.20 | -1.68 | 0.88  | 0.39  | -0.86 |
| Q75962 | Triple functional domain protein                                          | TRIO     | -1.67 | 2.18 | -0.29 | -0.30 | 1.62  | 0.51  | 0.49  | -1.56 | 0.54  | -1.31 | 0.92  | -0.64 |
| Q13439 | Golgin subfamily A member 4                                               | GOLGA4   | -1.67 | 1.31 | -1.31 | 1.26  | 0.42  | 0.62  | 0.42  | -1.94 | -0.75 | 0.23  | 0.61  | 0.44  |
| Q75420 | GRB10-interacting GYF protein 1                                           | GIGYF1   | -1.67 | 3.79 | 0.98  | 1.13  | 0.48  | 0.45  | -0.11 | 0.33  | 0.63  | -1.40 | -0.61 | -1.87 |
| Q9UBW7 | Zinc finger MYM-type protein 2                                            | ZMYM2    | -1.68 | 1.68 | -0.55 | 0.95  | 0.58  | 0.85  | -0.11 | -2.24 | -0.81 | -0.10 | 0.77  | 0.66  |
| Q9BY12 | S phase cyclin A-associated protein in the endoplasmic reticulum          | SCAPER   | -1.68 | 1.33 | -0.44 | 0.65  | 0.30  | 0.63  | 0.35  | -1.76 | -1.64 | -0.05 | 0.77  | 1.19  |
| Q9BF22 | Oxysterol-binding protein-related protein 7                               | OSBPPL7  | -1.68 | 1.77 | 0.89  | 0.30  | -1.31 | 1.08  | 0.79  | 0.27  | -1.28 | -1.48 | 0.84  | -0.10 |
| Q8IU55 | Epoxide hydrolase 4                                                       | EPHX4    | -1.68 | 2.53 | 0.42  | 1.11  | -1.09 | 1.41  | 0.37  | -1.04 | -0.98 | -1.26 | 0.36  | 0.71  |
| P40424 | Pre-B-cell leukemia transcription factor 1                                | PBX1     | -1.68 | 3.71 | 1.15  | 1.19  | 0.64  | -0.74 | 0.54  | 0.13  | 0.19  | -2.05 | -0.20 | -0.85 |
| P0DP25 | Calmodulin-3                                                              | CALM3    | -1.68 | 1.19 | -0.36 | 0.41  | 0.34  | 0.69  | 0.28  | -1.65 | -1.65 | 1.54  | 0.47  | -0.08 |
| P56945 | Breast cancer anti-estrogen resistance protein 1                          | BCAR1    | -1.68 | 3.41 | -0.88 | 1.56  | -0.15 | 0.88  | 1.26  | -0.98 | 0.45  | -1.40 | -0.44 | -0.30 |
| P98179 | RNA-binding protein 3                                                     | RBM3     | -1.70 | 2.28 | 1.25  | 1.39  | -1.10 | 0.65  | -0.11 | -0.80 | 0.14  | -1.17 | 0.82  | -1.07 |
| Q8TAG9 | Exocyst complex component 6                                               | EXOC6    | -1.70 | 4.44 | 0.77  | 1.17  | -0.32 | 0.48  | 1.01  | -1.35 | -0.72 | -1.75 | 0.43  | 0.28  |
| Q9H650 | 3'-5' RNA helicase YTHDC2                                                 | YTHDC2   | -1.71 | 2.23 | 0.64  | 0.02  | -0.39 | 0.94  | 0.69  | -1.30 | 0.95  | -1.58 | 0.83  | -1.00 |
| Q99578 | GTP-binding protein Rit2                                                  | RIT2     | -1.71 | 2.76 | 1.48  | 0.34  | -0.95 | 0.99  | 0.48  | -0.91 | -0.63 | -1.12 | 1.17  | -0.85 |
| O60231 | Pre-mRNA-splicing factor ATP-dependent RNA helicase DHX16                 | DHX16    | -1.71 | 5.08 | 1.32  | 1.17  | -0.45 | 0.69  | 0.53  | -0.42 | -1.26 | -1.74 | 0.34  | -0.17 |
| O14523 | Phospholipid transfer protein C2CD2L                                      | C2CD2L   | -1.71 | 1.64 | 1.09  | 0.05  | 1.13  | -0.16 | -0.43 | 0.74  | 0.62  | -2.25 | -0.25 | -0.54 |
| Q95263 | High affinity cAMP-specific and IBMX-insensitive 3',5'-cyclic phosphatase | PDE8B    | -1.71 | 1.79 | 1.59  | -0.81 | 1.42  | 0.47  | -0.89 | 0.23  | -0.76 | -1.04 | 0.63  | -0.83 |
| Q9BYC9 | 39S ribosomal protein L20, mitochondrial                                  | MRPL20   | -1.71 | 2.99 | -0.25 | -0.43 | 0.67  | 1.05  | 1.42  | -1.66 | -0.67 | -0.01 | 0.93  | -1.06 |
| P12755 | Ski oncogene                                                              | SKI      | -1.72 | 4.61 | 1.78  | 0.99  | -0.34 | 0.41  | 0.26  | -1.18 | -1.13 | 0.17  | 0.35  | -1.30 |
| Q5SZQ8 | CUGBP Elav-like family member 3                                           | CELF3    | -1.72 | 2.71 | 2.03  | -0.49 | -0.76 | 0.11  | 1.57  | -0.50 | -0.58 | -0.82 | 0.00  | -0.57 |
| Q8NCB2 | CaM kinase-like vesicle-associated protein                                | CAMKV    | -1.72 | 3.33 | 0.54  | 0.39  | 0.04  | 1.09  | 0.71  | -0.73 | -0.18 | -2.35 | 0.82  | -0.33 |
| Q96MW1 | Coiled-coil domain-containing protein 43                                  | CCDC43   | -1.72 | 1.42 | 1.08  | 0.48  | 0.52  | -0.54 | -0.02 | 1.01  | 0.86  | -1.73 | -1.51 | -0.16 |
| O14490 | Disks large-associated protein 1                                          | DLGAP1   | -1.72 | 2.05 | 0.35  | 0.71  | 0.15  | 0.35  | 0.51  | 0.24  | 0.59  | -2.53 | 0.57  | -0.93 |
| Q16875 | 6-phosphofructo-2-kinase/fructose-2,6-bisphosphatase 3                    | PFKFB3   | -1.72 | 1.38 | -1.09 | 0.71  | 0.25  | 0.87  | 0.74  | -1.10 | -1.94 | 0.60  | 0.78  | 0.19  |
| Q8NSV2 | Ephexin-1                                                                 | NGEF     | -1.73 | 2.18 | 0.69  | 0.75  | -0.43 | 0.69  | 0.39  | -0.57 | 0.90  | -2.35 | 0.44  | -0.51 |
| Q9Y3C5 | RING finger protein 11                                                    | RNF11    | -1.73 | 3.58 | -0.83 | 2.04  | 0.86  | 0.21  | 0.49  | -0.96 | -1.02 | -0.13 | 0.35  | -1.01 |
| Q14206 | Calcipressin-2                                                            | RCAN2    | -1.74 | 1.71 | -0.74 | 1.37  | -0.99 | 1.23  | 0.85  | -0.81 | -0.88 | -1.06 | 0.89  | 0.14  |
| Q94921 | Cyclin-dependent kinase 14                                                | CDK14    | -1.74 | 2.80 | 0.66  | 0.77  | -0.27 | 0.79  | 0.52  | 0.05  | -0.41 | -2.48 | 0.74  | -0.38 |
| Q96G28 | Cilia- and flagella-associated protein 36                                 | CFAP36   | -1.75 | 3.09 | 1.22  | 1.24  | -1.14 | 0.41  | 0.78  | -1.02 | -0.94 | -1.28 | 0.56  | 0.16  |
| Q9BSH4 | Translational activator of cytochrome c oxidase 1                         | TACO1    | -1.75 | 3.97 | 0.27  | 0.27  | 1.59  | 0.52  | 0.31  | -2.24 | -0.27 | -0.75 | 0.52  | -0.21 |
| P13804 | Electron transfer flavoprotein subunit alpha, mitochondrial               | ETF A    | -1.75 | 2.48 | -0.02 | 0.61  | 0.30  | 0.19  | 1.20  | -0.44 | -2.42 | 0.81  | 0.28  | -0.50 |
| Q9UN37 | Vacuolar protein sorting-associated protein 4A                            | VPS4A    | -1.75 | 2.26 | 0.38  | 0.89  | -0.18 | 0.95  | 0.10  | -0.32 | -0.01 | -2.57 | 0.65  | 0.10  |
| Q8NDH6 | Islet cell autoantigen 1-like protein                                     | ICA1L    | -1.75 | 2.50 | -0.56 | 1.69  | -0.84 | 0.90  | 1.02  | -0.80 | -0.69 | -0.96 | 0.89  | -0.66 |
| Q9Y514 | Protocadherin alpha-C2                                                    | PCDHAC2  | -1.75 | 2.47 | 1.28  | 0.92  | -0.79 | 0.32  | 0.47  | -0.17 | 1.18  | -1.55 | -0.41 | -1.26 |
| O14737 | Programmed cell death protein 5                                           | PDCD5    | -1.76 | 1.97 | -0.81 | 1.36  | 0.54  | -0.85 | 1.68  | -0.81 | 0.91  | 0.17  | -0.92 | 0.55  |
| O14522 | Receptor-type tyrosine-protein phosphatase T                              | PTPR     | -1.76 | 2.77 | -0.16 | 0.95  | 0.11  | 0.40  | 1.12  | -1.50 | -1.63 | 0.82  | 0.67  | -0.77 |
| P49674 | Casein kinase I isoform epsilon                                           | CSNK1E   | -1.76 | 4.89 | 1.33  | 0.58  | 0.50  | 0.58  | 0.39  | -0.11 | -0.54 | -2.19 | 0.40  | -0.94 |
| Q16288 | NT-3 growth factor receptor                                               | NTRK3    | -1.76 | 3.49 | 0.40  | 0.87  | 0.58  | 0.52  | 0.55  | -0.02 | -2.57 | -0.69 | 0.28  | 0.07  |
| Q9H1Y0 | Autophagy protein 5                                                       | ATG5     | -1.77 | 3.44 | 0.25  | 0.94  | 0.55  | 0.28  | 0.83  | 0.13  | 1.13  | -1.58 | -1.23 | -1.30 |
| Q9C0H9 | SRC kinase signaling inhibitor 1                                          | SRCIN1   | -1.77 | 6.54 | 0.82  | 0.86  | 0.45  | 1.47  | 0.07  | -1.19 | -0.43 | -1.46 | 0.51  | -1.10 |
| Q08043 | Alpha-actinin-3                                                           | ACTN3    | -1.77 | 1.40 | -1.35 | 0.37  | 0.69  | 0.69  | 1.07  | -1.46 | -1.43 | 0.25  | 0.75  | 0.39  |
| O60551 | Glycylpeptide N-tetradecanoyltransferase 2                                | NMT2     | -1.77 | 4.41 | 0.80  | 0.20  | 1.44  | -0.09 | 0.75  | -0.35 | 0.02  | -2.28 | 0.11  | -0.59 |
| Q86W42 | THO complex subunit 6 homolog                                             | THOC6    | -1.77 | 4.72 | 0.01  | 1.51  | 1.60  | 0.06  | -0.05 | -1.21 | -0.71 | -1.47 | 0.14  | 0.11  |
| Q969V3 | Nicalin                                                                   | NCLN     | -1.78 | 4.52 | 1.30  | 0.38  | 2.06  | 0.27  | -0.66 | -0.65 | -0.51 | -1.03 | -0.67 | -0.49 |
| Q9UPU7 | TBC1 domain family member 2B                                              | TBC1D2B  | -1.78 | 2.78 | -0.35 | 1.32  | -0.07 | 0.92  | 0.56  | -0.39 | -1.46 | -1.72 | 0.72  | 0.46  |
| Q9HNW7 | Leucine-rich repeat-containing protein 7                                  | LRRC7    | -1.78 | 3.48 | 0.65  | 2.09  | 1.32  | -0.54 | -0.60 | -0.50 | -0.50 | -0.85 | -0.53 | -0.53 |
| Q9H4G0 | Band 4.1-like protein 1                                                   | EPB41L1  | -1.78 | 4.58 | 0.62  | 1.38  | -0.50 | 0.89  | 0.71  | -0.73 | 0.27  | -1.66 | 0.32  | -1.30 |
| Q96C86 | m7GpppX diphosphatase                                                     | DCPS     | -1.78 | 1.98 | -0.79 | 1.22  | 0.82  | 0.21  | 0.45  | -1.25 | -1.87 | 0.22  | 0.09  | 0.91  |
| Q75038 | 1-phosphatidylinositol 4,5-bisphosphate phosphodiesterase eta-2           | PLCH2    | -1.79 | 5.21 | -0.04 | 1.88  | 0.56  | 0.49  | 0.40  | -1.20 | -1.17 | -0.11 | 0.50  | -1.31 |
| Q12851 | Mitogen-activated protein kinase kinase kinase 2                          | MAP4K2   | -1.79 | 2.51 | -0.05 | 0.80  | -0.19 | -0.24 | 1.89  | -0.83 | -1.83 | -0.44 | 0.27  | 0.62  |
| Q96JH7 | Deubiquitinating protein VCIPI35                                          | VCIPI1   | -1.80 | 1.37 | 0.23  | -0.75 | 1.14  | -0.20 | 1.05  | 0.51  | -0.20 | -2.02 | 1.00  | -0.76 |



|        |                                                                |           |       |      |       |       |       |       |       |       |       |       |       |       |
|--------|----------------------------------------------------------------|-----------|-------|------|-------|-------|-------|-------|-------|-------|-------|-------|-------|-------|
| Q8NDX5 | Polyhomeotic-like protein 3                                    | PHC3      | -1.80 | 2.77 | 0.56  | 0.76  | 0.70  | 0.54  | -0.07 | -1.25 | -2.19 | -0.33 | 0.51  | 0.78  |
| O00507 | Probable ubiquitin carboxyl-terminal hydrolase FAF-Y           | USP9Y     | -1.80 | 3.53 | 1.09  | 1.05  | -1.23 | 0.85  | 0.96  | -1.04 | -1.13 | 0.20  | 0.29  | -1.03 |
| O43524 | Forkhead box protein O3                                        | FOXO3     | -1.80 | 6.27 | 1.59  | -0.23 | 0.09  | 0.76  | 1.37  | -0.04 | -0.38 | -1.53 | -0.54 | -1.09 |
| Q9BXB4 | Oxysterol-binding protein-related protein 11                   | OSBPL11   | -1.80 | 2.01 | -0.32 | 1.34  | 0.29  | 0.66  | -0.02 | 0.27  | -1.56 | -1.83 | 0.59  | 0.59  |
| Q9Y230 | Rabphilin-3A                                                   | RPH3A     | -1.80 | 3.93 | 0.20  | 1.70  | -0.54 | 0.97  | 0.51  | -1.12 | 0.31  | -1.58 | 0.32  | -0.79 |
| O00555 | Voltage-dependent P/Q-type calcium channel subunit alpha-1A    | CACNA1A   | -1.80 | 2.57 | 1.13  | 0.44  | -0.76 | -0.59 | 2.10  | 0.34  | -0.67 | -1.01 | -0.74 | -0.24 |
| P34903 | Gamma-aminobutyric acid receptor subunit alpha-3               | GABRA3    | -1.81 | 4.96 | -0.61 | 0.91  | 0.45  | 1.46  | 0.99  | -0.72 | -0.91 | -1.34 | 0.69  | -0.93 |
| Q9P2U7 | Vesicular glutamate transporter 1                              | SLC17A7   | -1.81 | 3.64 | 0.52  | 1.65  | -0.28 | 0.71  | 0.17  | -0.60 | 0.52  | -1.38 | 0.35  | -1.66 |
| P41743 | Protein kinase C iota type                                     | PRKCI     | -1.81 | 2.71 | 0.10  | 2.09  | -0.33 | 0.33  | 0.13  | 0.05  | -0.44 | -2.03 | 0.23  | -0.11 |
| P54259 | Atrophen-1                                                     | ATN1      | -1.81 | 3.64 | 1.94  | -0.55 | -0.66 | 1.05  | 1.22  | -0.54 | -0.57 | -0.87 | -0.45 | -0.56 |
| Q15393 | Splicing factor 3B subunit 3                                   | SF3B3     | -1.82 | 1.06 | -1.27 | 0.97  | 0.28  | 0.76  | 0.47  | -1.22 | -1.68 | 0.12  | 0.79  | 0.79  |
| Q9BUQ8 | Probable ATP-dependent RNA helicase DDX23                      | DDX23     | -1.82 | 1.37 | -0.52 | 1.06  | 0.41  | 0.46  | 0.09  | -0.95 | -2.27 | 0.30  | 0.55  | 0.88  |
| Q96D05 | Protein FAM241B                                                | FAM241B   | -1.82 | 1.60 | -0.28 | 1.15  | -0.10 | 0.70  | 0.20  | -1.74 | -1.66 | 0.16  | 0.83  | 0.73  |
| Q81283 | Aldehyde dehydrogenase family 16 member A1                     | ALDH16A1  | -1.82 | 3.00 | 1.00  | 1.10  | -0.03 | 0.74  | -0.29 | -2.16 | -0.96 | -0.23 | 0.69  | 0.15  |
| Q06828 | Fibromodulin                                                   | FMOD      | -1.83 | 4.14 | 1.19  | 0.32  | -0.26 | 0.62  | 1.12  | -0.90 | 0.15  | -2.22 | -0.04 | 0.01  |
| C9JLW8 | Mapk-regulated corepressor-interacting protein 1               | MCRIP1    | -1.84 | 2.90 | 0.90  | 1.30  | -0.81 | -0.65 | 1.77  | -0.61 | -0.64 | -1.01 | 0.36  | -0.60 |
| Q969Q5 | Ras-related protein Rab-24                                     | RAB24     | -1.84 | 2.95 | 0.34  | 1.40  | 0.05  | 0.79  | -0.08 | -0.46 | -0.27 | -2.40 | 0.49  | 0.13  |
| P54762 | Ephrin type-B receptor 1                                       | EPHB1     | -1.84 | 2.71 | -0.30 | -0.15 | 0.63  | 0.51  | 1.64  | -1.65 | -1.59 | 0.41  | 0.14  | 0.35  |
| O95786 | Probable ATP-dependent RNA helicase DDX58                      | DDX58     | -1.85 | 2.41 | -1.29 | 0.89  | 1.17  | 0.55  | 0.83  | -0.63 | -1.04 | -1.48 | 0.66  | 0.34  |
| Q9Y216 | Ninein-like protein                                            | NINL      | -1.85 | 2.01 | 0.45  | 0.70  | 0.31  | 0.36  | 0.21  | -0.42 | -2.72 | 0.22  | 0.36  | 0.53  |
| Q9UJ06 | Drebrin-like protein                                           | DBNL      | -1.85 | 1.73 | -1.22 | 0.12  | 0.58  | 0.36  | 1.89  | -1.37 | -1.11 | 0.45  | 0.38  | -0.08 |
| Q9Y2X7 | ARF GTPase-activating protein GIT1                             | GIT1      | -1.85 | 2.79 | 0.13  | 1.41  | 0.02  | 0.86  | 0.00  | -0.97 | 0.33  | -2.23 | 0.50  | -0.04 |
| Q99767 | Amyloid-beta A4 precursor protein-binding family A member 2    | APBA2     | -1.85 | 5.40 | 0.34  | 0.78  | 1.19  | 1.11  | 0.02  | -1.08 | -1.75 | -0.71 | 0.72  | -0.61 |
| Q9Y296 | Trafficking protein particle complex subunit 4                 | TRAPPC4   | -1.86 | 1.82 | 1.07  | -0.73 | 1.52  | -0.73 | 0.65  | 1.29  | -0.69 | -0.97 | -0.71 | -0.70 |
| P29120 | Neuroendocrine convertase 1                                    | PCSK1     | -1.86 | 3.29 | 1.05  | 1.36  | -1.28 | 0.62  | 0.87  | 0.37  | -0.28 | -1.32 | -0.29 | -1.10 |
| O95166 | Gamma-aminobutyric acid receptor-associated protein            | GABARAP   | -1.86 | 2.86 | -0.98 | 0.49  | 0.97  | 0.55  | 1.36  | -1.11 | -1.12 | 0.89  | 0.14  | -1.19 |
| Q9BQE3 | Tubulin alpha-1C chain                                         | TUBA1C    | -1.86 | 1.71 | 0.08  | 1.11  | 0.16  | -1.20 | 1.56  | 0.12  | 0.25  | -1.45 | -1.18 | 0.55  |
| Q9ULX3 | RNA-binding protein NOB1                                       | NOB1      | -1.86 | 2.57 | -0.33 | 1.28  | -0.52 | -0.38 | 2.36  | -0.39 | -0.43 | -0.78 | -0.39 | -0.44 |
| P56524 | Histone deacetylase 4                                          | HDAC4     | -1.87 | 3.84 | 0.46  | 0.99  | -0.63 | 0.96  | 1.07  | -0.92 | -0.28 | -1.82 | 0.83  | -0.67 |
| A6NEL2 | Ankyrin repeat domain-containing protein SOWAHB                | SOWAHB    | -1.87 | 5.15 | -0.73 | 0.41  | 1.26  | 1.31  | 1.03  | 0.51  | -0.92 | -1.16 | -0.83 | -0.88 |
| Q6UUV9 | CREB-regulated transcription coactivator 1                     | CRTC1     | -1.87 | 3.88 | 1.20  | 1.00  | -0.20 | 0.43  | 0.49  | -1.22 | 0.79  | -1.77 | 0.16  | -0.89 |
| Q02410 | Amyloid-beta A4 precursor protein-binding family A member 1    | APBA1     | -1.88 | 3.88 | 1.42  | 1.63  | -0.29 | -0.10 | 0.18  | 0.24  | 0.02  | -1.27 | -0.26 | -1.57 |
| Q9HAD4 | WD repeat-containing protein 41                                | WDR41     | -1.88 | 2.89 | 0.40  | 1.29  | -1.09 | 1.10  | 0.71  | -0.65 | -0.85 | -1.14 | 1.06  | -0.82 |
| Q9HAU0 | Pleckstrin homology domain-containing family A member 5        | PLEKH5A   | -1.88 | 1.32 | -1.32 | 0.62  | 0.43  | 0.76  | 0.93  | -1.37 | -1.57 | 0.22  | 0.74  | 0.55  |
| O00257 | E3 SUMO-protein ligase CBX4                                    | CBX4      | -1.88 | 2.32 | -0.63 | 1.16  | -0.84 | 1.29  | 1.13  | -0.73 | -0.74 | -0.97 | 1.04  | -0.71 |
| Q96EV2 | RNA-binding protein 33                                         | RBM33     | -1.89 | 2.91 | 1.61  | -0.41 | -1.09 | 1.11  | 1.30  | -0.42 | -0.02 | -1.15 | -0.16 | -0.78 |
| Q9PJ07 | E3 ubiquitin-protein ligase KCMF1                              | KCMF1     | -1.90 | 7.00 | -0.52 | 1.22  | 1.02  | 0.91  | 1.41  | -0.70 | -0.77 | -1.13 | -0.68 | -0.76 |
| Q6Z5Y5 | Protein phosphatase 1 regulatory subunit 3F                    | PPP1R3F   | -1.91 | 3.04 | -0.19 | 1.29  | 0.45  | 0.88  | 0.11  | 0.44  | -1.78 | -1.65 | 0.47  | -0.03 |
| O43572 | A-kinase anchor protein 10, mitochondrial                      | AKAP10    | -1.91 | 2.44 | -0.41 | 1.26  | 0.46  | 0.56  | 0.36  | -1.09 | -2.23 | 0.37  | 0.41  | 0.33  |
| O95670 | V-type proton ATPase subunit G 2                               | ATP6V1G2  | -1.91 | 4.80 | 0.64  | 1.29  | 1.53  | -0.03 | -0.28 | -1.82 | -0.15 | -1.08 | -0.05 | -0.05 |
| A6NFN3 | RNA binding protein fox-1 homolog 3                            | RBF3X3    | -1.91 | 2.84 | 0.67  | -0.27 | -0.23 | 1.08  | 1.17  | -0.83 | -2.07 | -0.11 | 0.91  | -0.33 |
| Q15771 | Ras-related protein Rab-30                                     | RAB30     | -1.92 | 0.99 | -0.98 | 0.39  | 0.68  | 0.70  | 0.36  | -1.59 | -1.61 | 0.95  | 0.81  | 0.30  |
| Q8N1F7 | Nuclear pore complex protein Nup93                             | NUP93     | -1.92 | 2.59 | -0.92 | 1.13  | 0.48  | 0.85  | 0.72  | -1.08 | -1.82 | -0.51 | 0.63  | 0.52  |
| O75531 | Barrier-to-autointegration factor                              | BANF1     | -1.93 | 2.86 | 1.66  | 1.11  | 1.10  | -0.65 | -0.77 | -0.67 | -0.62 | -1.02 | -0.74 | 0.61  |
| Q14202 | Zinc finger MYM-type protein 3                                 | ZMYM3     | -1.95 | 2.15 | -0.32 | 0.42  | 0.96  | 0.67  | 0.35  | -1.68 | -1.90 | 0.37  | 0.63  | 0.50  |
| Q9ULX6 | A-kinase anchor protein 8-like                                 | AKAP8L    | -1.95 | 2.37 | 0.76  | 0.93  | -0.51 | 0.66  | 0.34  | 0.28  | -2.09 | -1.34 | 0.63  | 0.33  |
| Q9NZT2 | Opioid growth factor receptor                                  | OGFR      | -1.95 | 3.52 | 0.89  | 1.42  | -0.96 | 1.11  | 0.24  | -0.90 | -0.84 | -1.16 | 0.84  | -0.63 |
| Q92572 | AP-3 complex subunit sigma-1                                   | AP3S1     | -1.95 | 2.55 | 1.06  | 1.24  | -1.42 | 0.71  | 0.66  | -1.18 | -1.26 | 0.26  | 0.39  | -0.45 |
| Q9Y5L4 | Mitochondrial import inner membrane translocase subunit Tim13  | TIMM13    | -1.95 | 2.49 | -0.66 | 0.62  | 1.80  | -0.66 | 1.12  | -0.71 | -0.68 | -0.97 | -0.75 | 0.89  |
| Q86X18 | Uncharacterized protein ZSWIM9                                 | ZSWIM9    | -1.95 | 1.50 | -0.95 | 0.14  | 0.60  | 0.49  | 1.28  | -1.54 | -1.59 | 0.25  | 0.61  | 0.71  |
| Q81VH8 | Mitogen-activated protein kinase kinase kinase 3               | MAP4K3    | -1.96 | 2.46 | 0.40  | 0.77  | 0.25  | 0.72  | 0.18  | -1.76 | -1.83 | 0.91  | 0.55  | -0.18 |
| Q9Y311 | F-box only protein 7                                           | FBXO7     | -1.96 | 5.26 | 1.09  | 0.58  | 0.05  | 0.94  | 0.80  | -1.51 | -1.40 | -0.98 | 0.78  | -0.35 |
| Q81Z57 | Neurensin-1                                                    | NRSN1     | -1.97 | 3.26 | 0.65  | 1.45  | -1.18 | 0.32  | 1.39  | 0.33  | -0.48 | -1.26 | -0.19 | -1.03 |
| Q96QZ7 | Membrane-associated guanylate kinase, WW and PDZ domain-con    | MAGI1     | -1.97 | 1.78 | -0.74 | 1.52  | 0.04  | 0.83  | 0.11  | -1.59 | -1.36 | -0.22 | 0.79  | 0.61  |
| Q9H2D6 | TRIO and F-actin-binding protein                               | TRIOBP    | -1.97 | 1.23 | -1.16 | 0.22  | 0.27  | 0.86  | 1.17  | -2.04 | -0.70 | 0.23  | 0.75  | 0.41  |
| Q86UX6 | Serine/threonine-protein kinase 32C                            | STK32C    | -1.97 | 1.94 | -0.68 | 0.58  | 0.71  | 0.69  | 0.62  | -1.90 | -1.55 | 0.46  | 0.64  | 0.44  |
| Q8TBG4 | Ethanolamine-phosphate phospho-lyase                           | ETNPPL    | -1.97 | 2.64 | 0.18  | 0.46  | 0.37  | 0.67  | 0.76  | -0.91 | -2.48 | 0.04  | 0.75  | 0.17  |
| Q4G0J3 | La-related protein 7                                           | LARP7     | -1.97 | 3.87 | 0.33  | -0.92 | 1.10  | 1.49  | 0.85  | -0.56 | -0.85 | -1.25 | 0.71  | -0.89 |
| O95696 | Bromodomain-containing protein 1                               | BRD1      | -1.98 | 2.38 | -0.67 | 1.44  | -0.85 | 1.16  | 1.08  | -0.71 | -0.71 | -0.90 | 0.93  | -0.76 |
| Q5U5X0 | Complex III assembly factor LYRM7                              | LYRM7     | -1.99 | 3.84 | -0.91 | 1.01  | 1.27  | 0.89  | 0.57  | -1.01 | -1.10 | -1.39 | 0.45  | 0.23  |
| O43324 | Eukaryotic translation elongation factor 1 epsilon-1           | EEF1E1    | -1.99 | 2.77 | 0.64  | -0.24 | 1.55  | 0.07  | 0.36  | -1.22 | -1.12 | -1.40 | 1.12  | 0.24  |
| Q12888 | TP53-binding protein 1                                         | TP53BP1   | -2.01 | 3.29 | 0.29  | 0.20  | 1.36  | 0.50  | 0.35  | -1.63 | -1.86 | 0.44  | 0.52  | -0.18 |
| Q8N6R0 | eEF1A lysine and N-terminal methyltransferase                  | EEF1AKNMT | -2.01 | 3.98 | 1.34  | -0.05 | 1.13  | 0.52  | -0.02 | 0.54  | -1.65 | -1.31 | 0.38  | -0.89 |
| Q15256 | Receptor-type tyrosine-protein phosphatase R                   | PTPRR     | -2.02 | 3.66 | 0.51  | 2.06  | -0.88 | 0.29  | 0.85  | -0.73 | 0.43  | -1.06 | -0.73 | -0.74 |
| P31644 | Gamma-aminobutyric acid receptor subunit alpha-5               | GABRA5    | -2.02 | 3.87 | -0.44 | 1.43  | -0.75 | 1.26  | 1.59  | -0.51 | -0.62 | -0.97 | -0.54 | -0.45 |
| Q86SE5 | RNA-binding Raly-like protein                                  | RALYL     | -2.02 | 4.66 | 1.07  | -0.86 | 0.51  | 1.06  | 1.35  | 0.58  | -0.76 | -1.25 | -0.79 | -0.90 |
| Q9UPV7 | PHD finger protein 24                                          | PHF24     | -2.02 | 4.77 | 0.53  | 1.73  | -0.35 | 0.60  | 0.65  | -1.21 | 0.26  | -1.64 | 0.20  | -0.75 |
| P49454 | Centromere protein F                                           | CENPF     | -2.02 | 1.42 | -1.31 | 0.33  | 0.38  | 1.01  | 1.08  | -1.38 | -1.38 | -0.03 | 0.98  | 0.31  |
| Q5VT52 | Regulation of nuclear pre-mRNA domain-containing protein 2     | RPRD2     | -2.03 | 4.02 | 0.03  | 1.17  | 0.36  | 1.02  | 0.44  | -0.66 | -2.14 | -0.98 | 0.51  | 0.24  |
| Q61PU0 | Centromere protein P                                           | CENPP     | -2.04 | 1.21 | -1.37 | 0.69  | 1.14  | 0.50  | 0.37  | -1.44 | -1.40 | 0.18  | 0.58  | 0.76  |
| Q96PE5 | Opalin                                                         | OPALIN    | -2.04 | 4.15 | 0.15  | -0.27 | 0.99  | 0.86  | 1.25  | -1.42 | 0.34  | -1.78 | 0.32  | -0.44 |
| P62851 | 40S ribosomal protein S25                                      | RPS25     | -2.04 | 1.34 | 0.19  | -0.02 | 0.53  | 0.45  | 0.37  | 0.13  | -2.79 | 0.48  | 0.54  | 0.13  |
| Q5SQ10 | Alpha-tubulin N-acetyltransferase 1                            | ATAT1     | -2.05 | 3.03 | 0.82  | 0.79  | -0.30 | 1.66  | -0.49 | -0.25 | 0.23  | -2.02 | 0.20  | -0.62 |
| Q8N9V3 | WD repeat, SAM and U-box domain-containing protein 1           | WDSUB1    | -2.05 | 2.85 | -0.91 | 1.13  | 0.26  | 0.52  | 1.39  | -1.05 | 0.38  | -1.33 | -1.07 | 0.68  |
| Q9Y2D9 | Zinc finger protein 652                                        | ZNF652    | -2.05 | 9.44 | 1.52  | 0.75  | 0.45  | 0.77  | 0.65  | -1.06 | -0.90 | -1.44 | 0.18  | -0.92 |
| P83111 | Serine beta-lactamase-like protein LACTB, mitochondrial        | LACTB     | -2.06 | 2.32 | -1.08 | 1.39  | 0.51  | 0.75  | 0.54  | -0.82 | -1.14 | -1.41 | 0.77  | 0.50  |
| Q92796 | Disks large homolog 3                                          | DLG3      | -2.06 | 2.14 | 0.96  | 0.30  | -0.04 | -1.11 | 1.91  | 0.26  | 0.56  | -0.77 | -1.14 | -0.93 |
| Q92574 | Hamartin                                                       | TSC1      | -2.07 | 4.43 | 0.54  | 1.24  | 0.61  | 0.72  | 0.10  | -0.64 | -0.46 | -2.23 | 0.65  | -0.53 |
| P02533 | Keratin, type 1 cytoskeletal 14                                | KRT14     | -2.07 | 6.04 | 1.65  | -0.38 | 0.83  | 0.30  | 1.11  | -1.35 | -0.68 | -0.16 | 0.03  | -1.35 |
| P41732 | Tetraspanin-7                                                  | TSPAN7    | -2.08 | 3.20 | 1.22  | 1.68  | -0.65 | -0.26 | 0.57  | -1.22 | 0.41  | -1.28 | -0.72 | 0.25  |
| Q12824 | SWI/SNF-related matrix-associated actin-dependent regulator of | SMARCB1   | -2.09 | 2.74 | -2.09 | 1.09  | 0.44  | 1.04  | 0.10  | -1.75 | -1.60 | -0.16 | 0.86  | 0.26  |
| Q92567 | Protein FAM168A                                                | FAM168A   | -2.10 | 3.29 | 1.12  | -0.07 | -0.61 | 0.73  | 1.42  | -1.02 | -1.74 | -0.43 | 0.73  | -0.14 |
| Q15904 | V-type proton ATPase subunit S1                                | ATP6AP1   | -2.10 | 3.73 | 1.02  | 0.79  | -1.06 | 1.06  | 0.97  | -0.85 | -0.64 | -1.19 | 0.84  | -0.93 |

|        |                                                                   |           |       |       |       |       |       |       |       |       |       |       |       |       |
|--------|-------------------------------------------------------------------|-----------|-------|-------|-------|-------|-------|-------|-------|-------|-------|-------|-------|-------|
| P12236 | ADP/ATP translocase 3                                             | SLC25A6   | -2.11 | 4.23  | -0.38 | -0.60 | 1.09  | 1.31  | 1.83  | -0.60 | -0.60 | -0.99 | -0.61 | -0.44 |
| Q9Y3Y2 | Chromatin target of PRMT1 protein                                 | CHTOP     | -2.11 | 4.26  | 0.84  | 0.25  | 0.94  | 0.08  | 1.02  | -2.38 | -0.72 | -0.30 | 0.10  | 0.16  |
| Q81Y37 | Probable ATP-dependent RNA helicase DHX37                         | DHX37     | -2.12 | 2.60  | -0.81 | 0.22  | 0.62  | 1.21  | 1.03  | -0.94 | -1.50 | -1.11 | 0.97  | 0.31  |
| Q7Z478 | ATP-dependent RNA helicase DHX29                                  | DHX29     | -2.14 | 5.81  | 0.72  | -0.22 | 0.42  | 1.37  | 1.17  | 0.00  | -0.93 | -1.43 | -1.42 | 0.31  |
| O15523 | ATP-dependent RNA helicase DDX3Y                                  | DDX3Y     | -2.14 | 2.43  | 1.33  | -0.85 | -0.29 | 0.94  | 1.03  | -0.78 | -1.02 | 1.24  | -0.82 | -0.82 |
| Q8TF61 | F-box only protein 41                                             | FBXO41    | -2.14 | 3.79  | 0.68  | 0.98  | -0.55 | 1.06  | 0.69  | -1.54 | -1.57 | -0.06 | 0.78  | -0.46 |
| O75896 | Tumor suppressor candidate 2                                      | TUSC2     | -2.15 | 5.69  | 0.83  | 1.78  | 0.20  | 0.63  | -0.02 | -1.11 | -0.09 | -1.47 | 0.35  | -1.09 |
| Q16849 | Receptor-type tyrosine-protein phosphatase-like N                 | PTPRN     | -2.15 | 3.11  | 0.57  | 1.52  | -0.07 | 0.47  | 0.09  | -1.93 | 0.79  | -1.32 | 0.10  | -0.21 |
| Q9BTT0 | Acidic leucine-rich nuclear phosphoprotein 32 family member E     | ANP32E    | -2.16 | 2.28  | 0.13  | 1.15  | -0.07 | 0.62  | 0.34  | -0.71 | -2.45 | -0.14 | 0.61  | 0.53  |
| Q9BTE6 | Alanyl-tRNA editing protein Aarsd1                                | AARS01    | -2.16 | 2.69  | 0.18  | 0.32  | 0.08  | 1.02  | 0.83  | -0.81 | 0.10  | -2.47 | 0.56  | 0.19  |
| Q9BYX4 | Interferon-induced helicase C domain-containing protein 1         | IFIH1     | -2.17 | 4.79  | -0.73 | 1.44  | 1.40  | 0.20  | 0.89  | -0.99 | -1.00 | -1.27 | -0.08 | 0.14  |
| Q9H426 | Regulating synaptic membrane exocytosis protein 4                 | RIMS4     | -2.17 | 3.68  | 0.53  | 0.88  | 0.40  | 0.76  | 0.42  | -1.74 | -1.68 | 0.57  | 0.57  | -0.72 |
| Q9Y5W8 | Sorting nexin-13                                                  | SNX13     | -2.17 | 4.31  | 1.27  | 0.11  | 0.03  | 0.98  | 0.69  | -0.35 | -0.91 | -2.19 | 0.42  | -0.05 |
| Q8N3F8 | MICAL-like protein 1                                              | MICALL1   | -2.19 | 4.42  | -0.56 | 0.72  | 0.69  | 0.14  | 2.25  | -0.06 | -0.74 | -1.04 | -0.72 | -0.67 |
| Q14694 | Ubiquitin carboxyl-terminal hydrolase 10                          | USP10     | -2.19 | 3.81  | 0.11  | 1.11  | 0.30  | 0.96  | 0.48  | -0.81 | -0.88 | -2.14 | 0.70  | 0.16  |
| Q9UPQ3 | Arf-GAP with GTPase, ANK repeat and PH domain-containing prot     | AGAP1     | -2.20 | 3.01  | 0.60  | 0.83  | 0.54  | 0.37  | 0.31  | -0.10 | 0.26  | -2.69 | 0.16  | -0.29 |
| Q9UIG0 | Tyrosine-protein kinase BAZ1B                                     | BAZ1B     | -2.22 | 1.82  | -0.57 | 0.84  | 0.55  | 0.46  | 0.56  | -1.38 | -2.08 | 0.50  | 0.45  | 0.67  |
| Q9H6U6 | Breast carcinoma-amplified sequence 3                             | BCAS3     | -2.24 | 3.74  | -0.27 | 1.08  | 0.37  | 1.00  | 0.69  | -0.87 | -0.21 | -2.25 | 0.54  | -0.09 |
| Q9H0U9 | Testis-specific Y-encoded-like protein 1                          | TSPYL1    | -2.24 | 1.38  | -0.96 | 0.78  | 0.61  | 0.64  | 0.41  | -1.62 | -1.66 | 0.80  | 0.58  | 0.40  |
| Q9UK39 | Nocturnin                                                         | NOCT      | -2.25 | 2.38  | -0.34 | 2.51  | -0.51 | -0.40 | 1.03  | -0.42 | -0.36 | -0.69 | -0.47 | -0.36 |
| O43639 | Cytoplasmic protein NCK2                                          | NCK2      | -2.25 | 2.17  | 0.19  | 0.65  | 1.33  | 0.08  | -0.20 | -0.17 | -0.60 | -2.31 | 0.03  | 0.99  |
| O95886 | Disks large-associated protein 3                                  | DLGAP3    | -2.26 | 4.83  | -0.80 | 1.03  | 1.71  | 0.38  | 0.92  | -0.94 | -0.86 | -1.28 | 0.16  | -0.32 |
| Q15788 | Nuclear receptor coactivator 1                                    | NCOA1     | -2.26 | 3.35  | 0.44  | -0.54 | -0.61 | 1.58  | 1.98  | -0.52 | -0.50 | -0.83 | -0.56 | -0.44 |
| Q9UPP1 | Histone lysine demethylase PHF8                                   | PHF8      | -2.28 | 2.03  | 0.13  | 0.03  | 0.08  | 1.02  | 0.74  | -0.03 | -1.64 | -1.87 | 0.87  | 0.67  |
| Q5QJ66 | Deoxynucleotidyltransferase terminal-interacting protein 2        | DNTTIP2   | -2.29 | 5.86  | 0.63  | 1.04  | -0.08 | 0.68  | 1.27  | -1.18 | -1.17 | -1.58 | 0.43  | -0.04 |
| Q9UI30 | Multifunctional methyltransferase subunit TRM112-like protein     | TRMT112   | -2.29 | 4.06  | 0.61  | 0.73  | -0.17 | 0.25  | 1.54  | -1.27 | -1.19 | -1.46 | 0.32  | 0.64  |
| P48634 | Protein PRRC2A                                                    | PRRC2A    | -2.30 | 3.52  | 0.74  | 0.42  | -0.45 | 0.18  | 1.80  | -1.25 | 0.78  | -1.54 | -0.23 | -0.45 |
| Q86YM7 | Homer protein homolog 1                                           | HOMER1    | -2.32 | 3.31  | 0.83  | 0.85  | 0.69  | -0.20 | 0.57  | -1.29 | 0.70  | -2.14 | 0.08  | -0.08 |
| O43795 | Unconventional myosin-Ib                                          | MYO1B     | -2.33 | 3.29  | 1.07  | 0.55  | 0.55  | 0.74  | -0.19 | -2.16 | -1.15 | 0.58  | 0.42  | -0.41 |
| Q8WXD9 | Caskin-1                                                          | CASKIN1   | -2.33 | 3.38  | 0.96  | 0.97  | -0.61 | 1.10  | 0.24  | -1.01 | 0.08  | -1.87 | 0.77  | -0.63 |
| Q9UJX5 | Anaphase-promoting complex subunit 4                              | ANAPC4    | -2.34 | 1.66  | -1.36 | 1.05  | 0.41  | 0.74  | 0.84  | -1.42 | -1.41 | 0.02  | 0.65  | 0.47  |
| Q9Y450 | HBS1-like protein                                                 | HBS1L     | -2.34 | 1.48  | 0.07  | -0.19 | 0.77  | 0.36  | 0.61  | -0.20 | -2.63 | 0.82  | 0.48  | -0.07 |
| P59190 | Ras-related protein Rab-15                                        | RAB15     | -2.34 | 3.29  | 0.44  | 1.28  | -0.34 | 0.20  | 1.06  | -1.41 | 0.90  | -1.70 | 0.00  | -0.42 |
| Q14011 | Cold-inducible RNA-binding protein                                | CIRBP     | -2.34 | 6.24  | 1.18  | 0.84  | -0.34 | 1.03  | 0.85  | -1.87 | -0.48 | -0.53 | 0.27  | -0.96 |
| Q9Y2T4 | Serine/threonine-protein phosphatase 2A 55 kDa regulatory subunit | PPP2R2C   | -2.34 | 2.95  | 0.37  | 0.62  | 0.27  | 1.22  | 0.08  | -0.15 | -1.61 | -1.84 | 0.94  | 0.11  |
| P23786 | Carnitine O-palmitoyltransferase 2, mitochondrial                 | CPT2      | -2.35 | 1.46  | -1.39 | 0.65  | 0.85  | 0.61  | 0.81  | -1.47 | -1.44 | 0.49  | 0.49  | 0.40  |
| Q8N919 | Probable E3 ubiquitin-protein ligase DTX3                         | DTX3      | -2.36 | 3.29  | 1.09  | 0.80  | -0.86 | 1.04  | 0.52  | -0.93 | -1.22 | -1.44 | 0.76  | 0.23  |
| Q13523 | Serine/threonine-protein kinase PRP4 homolog                      | PRPF4B    | -2.37 | 1.36  | -0.76 | 0.49  | 0.33  | 0.46  | 0.96  | -1.53 | -1.84 | 0.62  | 0.76  | 0.51  |
| A8MU93 | Uncharacterized protein C17orf100                                 | C17orf100 | -2.37 | 3.95  | -0.31 | 1.10  | 0.07  | 1.04  | 1.01  | -1.38 | -1.46 | -1.01 | 0.69  | 0.25  |
| Q5T2E6 | Armadillo-like helical domain-containing protein 3                | ARMH3     | -2.40 | 4.01  | 2.01  | -0.78 | 0.24  | 0.54  | 0.95  | -0.83 | -0.79 | -1.07 | 0.42  | -0.68 |
| Q9UN86 | Ras GTPase-activating protein-binding protein 2                   | G3BP2     | -2.41 | 2.90  | 0.69  | 0.16  | -0.24 | 0.78  | 1.10  | -0.53 | 0.06  | -2.46 | 0.51  | -0.07 |
| Q9BZE4 | Nucleolar GTP-binding protein 1                                   | GTPBP4    | -2.43 | 2.91  | -0.78 | 0.55  | 0.51  | 0.97  | 1.18  | -0.09 | -1.39 | -1.65 | 0.90  | -0.20 |
| Q99627 | COP9 signalosome complex subunit 8                                | COPS8     | -2.44 | 3.84  | -0.77 | 0.87  | 0.58  | 1.18  | 0.97  | -0.90 | -0.90 | -1.15 | 1.07  | -0.94 |
| O60925 | Prefoldin subunit 1                                               | PFND1     | -2.45 | 2.54  | -0.99 | 0.43  | 0.43  | 1.03  | 1.33  | -1.03 | -1.08 | -1.30 | 0.89  | 0.30  |
| Q99700 | Ataxin-2                                                          | ATXN2     | -2.45 | 2.99  | -0.04 | 0.98  | 0.30  | 0.67  | 0.67  | -1.82 | -1.80 | 0.09  | 0.59  | 0.35  |
| Q5VUA4 | Zinc finger protein 318                                           | ZNF318    | -2.46 | 4.03  | 0.46  | 0.24  | 0.96  | 0.52  | 0.92  | -1.28 | -1.33 | -1.63 | 0.54  | 0.59  |
| Q6UWE0 | E3 ubiquitin-protein ligase LRSAM1                                | LRSAM1    | -2.51 | 2.30  | -0.35 | 1.42  | -0.37 | 1.41  | -0.02 | -0.90 | -0.81 | -0.37 | -1.26 | 1.25  |
| Q9NUA8 | Zinc finger and BTB domain-containing protein 40                  | ZBTB40    | -2.54 | 4.18  | -0.58 | 1.03  | 1.06  | 0.62  | 0.85  | -1.15 | -1.18 | -1.50 | 0.59  | 0.26  |
| Q08499 | cAMP-specific 3',5'-cyclic phosphodiesterase 4D                   | PDE4D     | -2.56 | 4.88  | 0.46  | 0.87  | 1.22  | 0.47  | 0.37  | -2.33 | -0.48 | -0.70 | 0.19  | -0.07 |
| Q9H6Y2 | WD repeat-containing protein 55                                   | WDR55     | -2.59 | 3.93  | 1.15  | 0.32  | 2.18  | -0.65 | 0.04  | -0.62 | -0.03 | -1.05 | -0.71 | -0.64 |
| O95365 | Zinc finger and BTB domain-containing protein 7A                  | ZBTB7A    | -2.60 | 2.77  | -0.67 | 1.18  | 0.60  | 0.99  | 0.27  | -1.50 | -0.15 | -1.71 | 0.66  | 0.33  |
| O60237 | Protein phosphatase 1 regulatory subunit 12B                      | PPP1R12B  | -2.62 | 6.06  | 1.71  | 1.01  | -0.59 | 0.93  | 0.54  | -1.03 | -0.36 | -1.35 | -0.69 | -0.17 |
| P17081 | Rho-related GTP-binding protein RhoQ                              | RHOQ      | -2.63 | 4.94  | 0.16  | 0.83  | 0.09  | 0.82  | 1.39  | 0.34  | -1.20 | -1.57 | -1.24 | 0.37  |
| Q5T5P2 | Sickle tail protein homolog                                       | KIAA1217  | -2.65 | 4.98  | 0.14  | 0.95  | 0.77  | 0.84  | 0.75  | -1.05 | -0.49 | -2.11 | 0.54  | -0.33 |
| Q96A00 | Protein phosphatase 1 regulatory subunit 14A                      | PPP1R14A  | -2.69 | 3.31  | 0.65  | 0.10  | 1.54  | 0.73  | -0.40 | -1.65 | -1.44 | 0.00  | 0.78  | -0.32 |
| Q07343 | cAMP-specific 3',5'-cyclic phosphodiesterase 4B                   | PDE4B     | -2.75 | 5.02  | -0.37 | 1.37  | 0.08  | 1.23  | 0.91  | -0.95 | -0.97 | -1.18 | 0.77  | -0.90 |
| P25189 | Myelin protein P0                                                 | MPZ       | -2.83 | 2.30  | 0.13  | -0.43 | 2.74  | -0.02 | -0.20 | -0.16 | -0.22 | -0.53 | -0.72 | -0.59 |
| Q96538 | Ribosomal protein S6 kinase delta-1                               | RPS6KC1   | -2.87 | 7.44  | 0.55  | 1.38  | 1.01  | 0.68  | 0.28  | -1.15 | -0.60 | -1.47 | 0.43  | -1.10 |
| Q9Y6R4 | Mitogen-activated protein kinase kinase kinase 4                  | MAP3K4    | -2.90 | 3.17  | -1.29 | 1.07  | 1.47  | 0.87  | 0.46  | -0.59 | -0.20 | -1.60 | 0.13  | -0.34 |
| Q5BKZ1 | DBIRD complex subunit ZNF326                                      | ZNF326    | -2.90 | 5.75  | 1.08  | 0.20  | 0.64  | 0.57  | 1.12  | -0.61 | -1.91 | -1.12 | 0.53  | -0.51 |
| Q9H792 | Inactive tyrosine-protein kinase PEAK1                            | PEAK1     | -2.93 | 3.70  | -0.84 | 0.40  | 0.59  | 1.24  | 1.38  | -0.89 | -0.90 | -1.07 | 0.94  | -0.84 |
| O94762 | ATP-dependent DNA helicase Q5                                     | RECQL5    | -2.97 | 6.82  | 0.41  | 0.35  | 1.67  | 0.56  | 0.72  | -1.12 | 0.21  | -1.49 | -1.25 | -0.06 |
| Q6ZT07 | TBC1 domain family member 9                                       | TBC1D9    | -3.02 | 0.89  | -0.90 | 0.99  | 0.94  | -0.96 | 0.98  | -0.95 | -0.97 | 0.83  | 0.99  | -0.95 |
| Q13464 | Rho-associated protein kinase 1                                   | ROCK1     | -3.02 | 2.95  | -0.22 | 0.43  | 1.79  | 0.51  | -0.07 | -0.01 | -1.18 | 1.08  | -1.15 | -1.18 |
| Q9NVP4 | Double zinc ribbon and ankyrin repeat-containing protein 1        | DZANK1    | -3.02 | 2.60  | 2.11  | 0.25  | -1.00 | 0.61  | 0.32  | -0.92 | -0.87 | -1.10 | 0.46  | 0.14  |
| Q9ULH7 | Myocardin-related transcription factor B                          | MRTFB     | -3.11 | 5.02  | 0.88  | 1.29  | -0.07 | 0.49  | 0.74  | -1.53 | -0.02 | -1.75 | 0.41  | -0.44 |
| P35030 | Trypsin-3                                                         | PRSS3     | -3.24 | 3.55  | 0.41  | 0.37  | -0.49 | 0.70  | 1.71  | -1.23 | 0.29  | 0.67  | -1.26 | -1.18 |
| Q13427 | Peptidyl-prolyl cis-trans isomerase G                             | PPIG      | -3.27 | 5.28  | 0.69  | -0.19 | 0.26  | 1.09  | 1.46  | -1.32 | -1.25 | -0.76 | 0.78  | -0.77 |
| E9PRG8 | Uncharacterized protein C11orf98                                  | C11orf98  | -3.32 | 1.61  | -1.15 | 0.57  | 0.53  | 0.76  | 0.93  | -1.56 | -1.54 | 0.31  | 0.67  | 0.48  |
| Q6YHK3 | CD109 antigen                                                     | CD109     | -3.43 | 14.94 | 0.28  | 0.92  | 1.05  | 1.12  | 1.12  | -0.59 | -1.03 | -1.35 | -0.60 | -0.93 |
| Q09019 | Dystrophin myotonia WD repeat-containing protein                  | DMWD      | -3.57 | 3.45  | -0.09 | 0.45  | 2.20  | 0.20  | -0.09 | -0.50 | -1.87 | -0.33 | 0.16  | -0.14 |
| O60733 | 85/88 kDa calcium-independent phospholipase A2                    | PLA2G6    | -3.93 | 5.45  | 0.68  | 1.22  | 1.01  | 0.24  | 0.37  | 0.29  | -1.51 | -1.74 | 0.11  | -0.66 |
| POC7X4 | Putative ferritin heavy polypeptide-like 19                       | FTH1P19   | -3.98 | 1.45  | -1.35 | 0.67  | 0.69  | 0.73  | 0.78  | -1.36 | -1.37 | -0.38 | 0.81  | 0.77  |
