# Supplementary material for: TMEM106B Puncta Is Increased in Multiple Sclerosis Plaques, and Reduced Protein in Mice Results in Delayed Lipid Clearance Following CNS Injury
Source: MDPI journal article supplement (doi:10.3390/cells12131734), 2023-06-27
Supplement: s1 [file s1]

**Supplemental TABLE 1:** Available samples for the ongoing study. **For nanoLC-ms/ms:**

**RRMS**

| Case # | PMI* | Age | Gender | Diagnosis |
|--------|------|-----|--------|-----------|
| 1      | 5h   | 65  |        | Diagnosis |
| 2      | 5h   | 65  | Female | RRMS      |
| 3      | 24h  | 61  | Female | RRMS      |
| 4      | 2h   | 69  | Male   | RRMS      |
| 5      | 7h   | 64  | Female | RRMS      |

\*Post-mortem interval

**Non-neurological White Matter Controls**

| Case # | PMI  | Age | Gender | Diagnosis       |
|--------|------|-----|--------|-----------------|
| 1      | 5h   | 74  | Male   | Cardiac         |
| 2      | 5h   | 57  | Female | Breast Cancer   |
| 3      | 19h  | 59  | Male   | Cardiac         |
| 4      | 9h   | 63  | Male   | Infarct/Cardiac |
| 5      | 6.5h | 65  | Male   | Cardiac         |

**For IF and IHC Staining:**

**MS Cases Paraffin-**

| <u>Case</u> | <u>PMI</u> | <u>Age</u> | <u>Gender</u> | <u>Diagnosis</u>                  |
|-------------|------------|------------|---------------|-----------------------------------|
| 11          | 15h        | 49         | Female        | Secondary Progressive, Plaque and |
| 12          | <10h       | 61         | NAWM Female   | RRMS, Plaque and NAWM             |
| 13          | 10h        | 61         | Mal           | RRMS, Plaque and NAWM             |
| 14          | UNK        | 68         | e             | MS type unknown, Plaque and       |
| 15          | 14h        | 73         | Mal           | NAWM RRMS, Plaque and             |
| 16          | 21h        | 65         | Female        | NAWM RRMS, Plaque and             |
| 17          | 14h        | 64         | NAWM Male     | RRMS, Plaque                      |
| 18          | 12h        | 69         | and NAWM Male | RRMS, Plaque and NAWM             |

|    |     |    |      |                       |
|----|-----|----|------|-----------------------|
| 19 | 12h | 57 | Male | RRMS, Plaque and NAWM |
| 20 | 18h | 68 | Male | RRMS, Plaque and NAWM |

### **Other Neurologic Controls and Non-Neurologic Controls**

#### **Alzheimer's Disease Paraffin-embedded**

| Case # | PMI  | Age | Gender | Diagnosis |
|--------|------|-----|--------|-----------|
| 21     | UNK* | 86  | Female | AD        |
| 22     | UNK  | 66  | Female | AD        |
| 23     | UNK  | 62  | Male   | AD        |
| 24     | 12 h | 70  | Male   | AD        |
| 25     | UNK  | 63  | Male   | AD        |
| 26     | UNK  | 80  | Female | AD        |
| 27     | UNK  | 61  | Male   | AD        |

\*Unknown

#### **Non-Neurological Controls (NNCs) Paraffin-embedded**

| Case # | PMI | Age | Gender | Diagnosis                                                                      |
|--------|-----|-----|--------|--------------------------------------------------------------------------------|
| 28     | 2 d | 72  | Male   | Pneumonia                                                                      |
| 29     | 22h | 65  | Female | Septic shock                                                                   |
| 30     | UNK | 78  | Male   | No diagnostic abnormality recognized                                           |
| 31     | UNK | 67  | Male   | No diagnostic abnormality recognized                                           |
| 32     | UNK | 62  | Male   | No diagnostic abnormality recognized                                           |
| 33     | UNK | 81  | Male   | Primary Age-related tauopathy                                                  |
| 34     | UNK | 26  | Male   | Severe and chronic lung injury, respiratory distress syndrome, liver cirrhosis |
| 35     | UNK | 59  | Male   | Advanced K-ras-mutated non-small cell adenocarcinoma stage IV                  |
| 36     | UNK | 48  | Female | Metastatic carcinoma probable urachal origin and hypertension                  |
| 37     | UNK | 68  | Female | Toxic epidermal necrolysis 60% body                                            |
